# Supplementary material for: Integrated Analysis of Long Non-coding RNAs (lncRNAs) and mRNAs Reveals the Regulatory Role of lncRNAs Associated With Salt Resistance in Camellia sinensis
Source: Front Plant Sci. 2020 Mar 19;11:218. doi: 10.3389/fpls.2020.00218 (PMC7096555; doi:10.3389/fpls.2020.00218)
Supplement: TABLE S1 — Statistics of DE-lncRNAs. [file Table_1.xls]

#ID	CK1_Count	CK2_Count	CK3_Count	Salt1_Count	Salt2_Count	Salt3_Count	CK1_FPKM	CK2_FPKM	CK3_FPKM	Salt1_FPKM	Salt2_FPKM	Salt3_FPKM	FDR	log2FC	regulated
MSTRG.100445.2	0	0	32	237	137	82	0	0	1.943862	9.957688	8.176397	3.669786	0.00048185308784737	3.20535023044211	up
MSTRG.100989.1	20	12	9	0	0	0	0.658773	0.320913	0.408683	0	0	0	0.0366323806760118	-Inf	down
MSTRG.10116.3	1	0	0	54	22	33	3.8e-05	0	0	0.380344	0.221971	0.247322	0.00144532589381488	6.60817939963998	up
MSTRG.101650.3	17	1	1	90	113	94	0.09092	0.001484	0.00101	0.480748	0.86118	0.537063	0.00058377916711381	3.88870141985105	up
MSTRG.105774.1	0	0	0	47	20	22	0	0	0	1.289288	0.770049	0.637892	0.00151457890505792	Inf	up
MSTRG.105960.2	29	8	0	98	60	106	0.673294	0.159353	0	2.199146	1.919493	2.556678	0.0423488577742091	2.75191112326473	up
MSTRG.106114.4	11	1	1	86	78	24	0.089746	6.3e-05	0.007215	0.737349	0.944496	0.221578	0.0453902189646673	3.72978300698564	up
MSTRG.106816.8	33	25	14	0	0	0	0.644533	0.416359	0.374424	0	0	0	0.00144470655645746	-Inf	down
MSTRG.108768.1	111	227	71	62	12	22	0.345793	0.606702	0.315497	0.186196	0.049366	0.068463	0.037830800274037	-2.33950957263717	down
MSTRG.109059.17	1	0	2	92	17	53	0.002421	0	0.015087	0.520068	0.134406	0.320784	0.00207897968215483	5.20284426137369	up
MSTRG.109201.1	213	109	67	36	0	18	0.89783	0.391188	0.400825	0.1449	0	0.074523	0.0371058155143348	-3.17911307158199	down
MSTRG.113150.1	150	253	124	52	47	43	5.829517	8.388686	6.88381	1.925572	2.479416	1.699758	0.0312251775617355	-2.04262929998019	down
MSTRG.114748.1	48	24	35	3	0	2	0.42735	0.180227	0.44172	0.025524	0	0.018473	0.00545643535166315	-4.81876466987778	down
MSTRG.11607.1	20	9	9	0	0	0	0.603547	0.21695	0.371343	0	0	0	0.0495020889136049	-Inf	down
MSTRG.116638.9	16	34	8	0	0	0	0.505836	0.941484	0.358021	0	0	0	0.00689185154687481	-Inf	down
MSTRG.116911.1	0	0	0	21	28	12	0	0	0	0.367112	0.690347	0.22066	0.0125349173657802	Inf	up
MSTRG.118391.1	35	114	33	282	178	346	0.138934	0.391259	0.184171	1.091676	0.975064	1.437421	0.0370121142580336	2.0233935820207	up
MSTRG.119951.1	11	30	11	0	0	0	0.299824	0.71885	0.429613	0	0	0	0.0118533013892413	-Inf	down
MSTRG.120498.1	9	17	18	205	165	296	0.114851	0.182106	0.324782	2.519037	2.878763	3.911552	4.19019493456212e-06	3.65938231236851	up
MSTRG.12085.1	0	0	0	24	22	37	0	0	0	0.419311	0.541092	0.681036	0.00199061523336056	Inf	up
MSTRG.121097.1	126	107	71	15	19	20	4.830571	3.482259	3.844768	0.546402	0.953472	0.779265	0.0134566989189668	-2.62942259456527	down
MSTRG.121195.1	112	95	75	20	0	18	2.871247	2.058421	2.734184	0.486453	0	0.464946	0.0044007844065667	-3.21902357212385	down
MSTRG.121855.1	0	0	0	54	33	45	0	0	0	2.625804	2.23492	2.334843	6.89925092836402e-05	Inf	up
MSTRG.122572.1	0	28	9	310	112	221	0	0.981688	0.488138	12.406063	6.32038	9.485467	2.43268621031906e-06	3.92620660829749	up
MSTRG.123314.1	101	165	58	4	6	3	0.545994	0.764471	0.448729	0.016371	0.043958	0.016062	2.43268621031906e-06	-4.70403709060351	down
MSTRG.123314.2	0	3	30	188	102	130	0	0.007902	0.186549	0.809368	0.624602	0.601626	0.000295771360863538	3.09674169661868	up
MSTRG.123550.3	1015	1408	871	90	56	107	15.779022	18.669218	19.301132	1.333767	1.176867	1.710366	1.04841664588091e-08	-3.90234078616358	down
MSTRG.123551.1	4059	5038	2827	497	330	615	26.240234	27.776951	26.055946	3.087045	2.91109	4.100241	0.00058377916711381	-3.22783867109709	down
MSTRG.124649.1	0	7	0	73	49	60	0	0.043389	0	0.581345	0.558817	0.515531	0.00140781565148962	4.74212279226226	up
MSTRG.126160.1	1409	1239	889	378	319	365	28.901901	21.669407	26.004057	7.447319	8.925664	7.724235	0.028623268107835	-1.91823775880912	down
MSTRG.128486.1	91	94	24	2	4	7	3.445681	3.036817	1.296827	0.036662	0.207503	0.235628	0.00058377916711381	-4.03814124474194	down
MSTRG.128954.1	0	0	0	81	61	28	0	0	0	2.360757	2.513608	0.86569	4.83392405878279e-06	Inf	up
MSTRG.129444.1	2	2	0	23	39	47	0.015531	0.013247	0	0.164372	0.404442	0.374322	0.0115496851281465	4.80903397941066	up
MSTRG.132769.1	0	0	0	37	18	26	0	0	0	0.75454	0.503967	0.56642	0.00272900777670914	Inf	up
MSTRG.134598.1	0	0	2	33	37	16	0	0	0.03264	0.355269	0.579678	0.189524	0.0134566989189668	4.87359521369749	up
MSTRG.135141.1	16	14	19	0	0	1	0.653311	0.511995	1.13287	0	0	0.038738	0.0391890120685953	-5.85103571531817	down
MSTRG.135274.1	72	71	33	594	355	434	0.624058	0.522366	0.408101	4.974377	4.225278	3.902166	0.000135071962393078	2.80066885876064	up
MSTRG.136260.1	95	126	46	428	405	453	1.297298	1.470369	0.888148	5.6466	7.588724	6.414406	0.0109145365914825	2.15709259330009	up
MSTRG.136364.45	119	3	0	270	232	177	0.501008	0.008318	0	1.096717	1.336941	0.767548	0.0131843738200161	2.3872820590522	up
MSTRG.139242.1	24	12	22	228	247	384	0.597438	0.236087	0.784806	5.474351	8.435272	9.907921	4.83392405878279e-06	3.64270566616724	up
MSTRG.1396.6	4	9	8	114	97	64	0.026269	0.05906	0.091787	0.927642	1.124904	0.559822	0.00207897968215483	3.46627466412022	up
MSTRG.140161.1	3	3	2	117	136	306	0.091337	0.077901	0.065124	5.128498	8.480604	14.418553	0.000984193165269351	5.97666539609903	up
MSTRG.140165.1	0	0	0	57	76	174	0	0	0	0.454677	0.861132	1.487147	0.000257711723223522	Inf	up
MSTRG.140463.1	0	99	0	241	133	137	0	0.279748	0	0.769563	0.602429	0.468845	0.0371059987087134	2.38569189568602	up
MSTRG.140796.1	106	130	46	15	19	23	3.065133	3.197324	1.879262	0.413468	0.738038	0.672852	0.034776301689028	-2.38884482510241	down
MSTRG.14108.1	885	845	750	260	138	307	13.135664	10.693974	15.867773	3.712023	2.791069	4.699462	0.0134566989189668	-2.05741817087141	down
MSTRG.141164.1	131	233	75	48	18	35	2.869855	4.369707	2.327637	0.996934	0.514816	0.777445	0.0194450772006621	-2.3010057681122	down
MSTRG.141949.1	134	108	80	597	540	703	0.403066	0.277124	0.342178	1.730008	2.218187	2.182106	0.00184363407062325	2.33912005609034	up
MSTRG.142510.3	1	2	6	82	17	79	0.001008	0.044408	0.396823	3.763017	1.087442	3.894871	0.0201212957095098	3.81123001940297	up
MSTRG.142541.1	131	102	56	16	11	23	2.094342	1.387492	1.256983	0.241121	0.219976	0.371681	0.0147208895304855	-2.69192140283966	down
MSTRG.143029.1	3	0	7	76	50	84	0.031941	0	0.145905	1.157273	1.0718	1.370867	0.00121035163061637	3.92566627871763	up
MSTRG.143628.1	11	29	49	151	222	243	0.130378	0.303728	0.843633	1.781102	3.724494	3.074124	0.00453241724007389	2.49917142659289	up
MSTRG.143784.2	0	0	0	37	25	7	0	0	0	0.535995	0.51556	0.097615	0.00739516757772253	Inf	up
MSTRG.144846.1	398	308	255	0	32	0	17.265661	11.397886	15.794985	0	1.856148	0	8.63168522363514e-12	-4.83968617934324	down
MSTRG.145197.2	16	21	15	0	0	0	0.326371	0.375421	0.424303	0	0	0	0.0109145365914825	-Inf	down
MSTRG.145316.44	181	138	118	0	50	0	2.449295	1.590338	2.276578	0	0.920423	0	0.000178808421236091	-3.0620869443295	down
MSTRG.145320.22	58	52	36	0	0	0	0.13081	0.100837	0.115976	0	0	0	2.91616999044414e-06	-Inf	down
MSTRG.146118.2	12	49	16	0	4	0	0.240206	0.852057	0.445424	0	0.104237	0	0.0481842048338385	-4.12193814809142	down
MSTRG.146599.1	3	20	15	0	0	0	0.023484	0.197849	0.23676	0	0	0	0.0469333448076185	-Inf	down
MSTRG.147380.1	0	25	0	118	51	66	0	0.081698	0	0.444402	0.274231	0.267909	0.0222908515842494	3.22937545467323	up
MSTRG.147718.2	83	70	23	12	15	0	0.909609	0.647878	0.348039	0.12488	0.222376	0	0.0424070184023718	-2.77322692084148	down
MSTRG.147815.1	39	42	38	311	626	637	0.217282	0.201133	0.303344	1.691446	4.84193	3.724221	0.00453241724007389	3.57742096593573	up
MSTRG.148397.1	78	120	35	20	15	8	1.24959	1.632807	0.789262	0.307877	0.30721	0.129456	0.0397469244200741	-2.5604777979749	down
MSTRG.148404.1	234	229	114	66	34	54	1.342316	1.118455	0.930728	0.363981	0.26545	0.317841	0.0251668860292056	-2.09502465511222	down
MSTRG.151316.8	0	0	0	121	156	47	0	0	0	0.611053	1.112521	0.250757	0.000223869950078825	Inf	up
MSTRG.151316.9	0	0	0	21	49	23	0	0	0	0.1811	0.60857	0.216639	0.0115496851281465	Inf	up
MSTRG.151382.1	103	68	45	411	425	690	0.851058	0.477381	0.527656	3.287086	4.832777	5.93193	0.000996462449948335	2.67661791180017	up
MSTRG.152108.2	18	21	33	0	2	0	0.273711	0.279694	0.739051	0	0.042259	0	0.0112523294001312	-5.2053628534999	down
MSTRG.152933.1	2	4	23	139	183	355	0.036862	0.099817	1.125883	4.623167	8.642337	12.722338	0.00464343246928978	4.10684835357553	up
MSTRG.152990.1	0	0	0	106	80	92	0	0	0	3.867443	4.148333	3.601306	6.13667621785447e-09	Inf	up
MSTRG.154726.2	0	0	0	25	18	63	0	0	0	0.413672	0.409425	1.115679	0.0131843738200161	Inf	up
MSTRG.154782.1	0	0	0	18	24	8	0	0	0	0.458771	0.861669	0.198441	0.034136180751669	Inf	up
MSTRG.160.2	0	0	0	106	54	36	0	0	0	0.855428	0.619349	0.312652	1.31503894800981e-06	Inf	up
MSTRG.16444.6	1	0	1	38	12	37	0.009004	0	0.023384	0.597233	0.263281	0.627814	0.0153225835315469	5.01981787632805	up
MSTRG.17069.33	157	182	131	35	46	31	1.185546	1.170513	1.41112	0.25362	0.469827	0.238861	0.0183601218908992	-2.22030888190359	down
MSTRG.17070.4	550	514	306	92	0	95	3.107796	2.479363	2.469715	0.497729	0	0.550613	9.50090169545886e-06	-3.16080153108631	down
MSTRG.18399.1	113	21	134	3	0	0	0.642858	0.099298	1.088649	0.016485	0	0	0.0371058155143348	-7.12505638409841	down
MSTRG.2010.3	9	4	3	59	68	113	0.12712	0.048979	0.044177	0.867381	1.408249	1.784095	0.00207620607774686	3.77339004860453	up
MSTRG.20787.7	36	91	84	24	0	0	0.390093	0.852175	1.309396	0.25072	0	0	0.0465536179363666	-3.68407956264768	down
MSTRG.20899.1	492	470	205	136	153	70	2.548475	2.076521	1.511221	0.674322	1.081822	0.370467	0.0253202772376278	-1.80822634915696	down
MSTRG.20972.1	35	25	27	189	184	146	0.50531	0.315184	0.554806	2.680772	3.711093	2.212158	0.0128005103347489	2.36563349930053	up
MSTRG.21689.1	27	37	24	159	250	314	0.169343	0.195337	0.211587	0.964252	2.153509	2.047234	0.00545643535166315	2.90525545965576	up
MSTRG.21811.7	18	21	9	0	0	0	0.727052	0.727982	0.531137	0	0	0	0.0178565009769702	-Inf	down
MSTRG.2213.15	54	70	65	0	0	0	0.24191	0.264934	0.413588	0	0	0	7.15357198780526e-08	-Inf	down
MSTRG.2213.7	44	42	109	0	0	0	0.18392	0.150249	0.655502	0	0	0	0.0157902347779276	-Inf	down
MSTRG.2213.9	40	40	42	0	0	0	0.168951	0.143048	0.249702	0	0	0	1.47085168460272e-05	-Inf	down
MSTRG.23694.1	56	65	25	209	193	247	0.330546	0.328153	0.20707	1.203245	1.572206	1.522416	0.0491140606476997	2.03675368708056	up
MSTRG.25186.1	22	10	10	0	0	0	0.716563	0.289188	0.437258	0	0	0	0.031709453851713	-Inf	down
MSTRG.25764.2	0	0	17	135	119	154	0	0	0.600626	3.385554	4.23505	4.15882	4.83392405878279e-06	4.01199743340134	up
MSTRG.26810.3	0	0	15	82	30	59	0	0	0.194729	0.757638	0.395137	0.582175	0.0275192081998283	2.86182146404771	up
MSTRG.27406.1	0	68	0	18619	10275	19860	0	1.876405	0	582.55658	456.366486	666.46228	1.87183662006442e-08	9.51769944533438	up
MSTRG.29504.1	119	115	33	8	17	19	1.13752	0.931567	0.437485	0.070134	0.211378	0.182593	0.0156908259574997	-2.62863361674747	down
MSTRG.29549.1	23	11	7	71	97	123	0.364156	0.149673	0.139949	1.087546	2.118427	2.013677	0.028623268107835	2.71896017940114	up
MSTRG.29847.4	0	0	0	48	15	14	0	0	0	0.472767	0.206956	0.139253	0.00448313315639529	Inf	up
MSTRG.30505.1	0	0	0	32	37	55	0	0	0	1.260749	2.11501	2.35938	0.000103292137303244	Inf	up
MSTRG.30582.5	0	0	0	59	54	159	0	0	0	0.6588	0.852059	1.918499	0.000931032925132014	Inf	up
MSTRG.30841.1	27	52	11	169	137	218	0.161849	0.266468	0.091406	0.986968	1.136977	1.372526	0.0154180444191119	2.46407365531187	up
MSTRG.30841.2	0	0	0	48	104	38	0	0	0	0.445325	1.365309	0.370684	0.00687837243623477	Inf	up
MSTRG.30996.1	5	4	0	42	36	50	0.150012	0.106082	0	1.425472	1.746149	1.823311	0.0351576015581836	3.80875441033773	up
MSTRG.31209.1	0	16	8	141	37	77	0	0.194612	0.144578	1.949099	0.713447	1.139025	0.0105948653922924	3.12330554512381	up
MSTRG.31273.1	0	0	0	35	18	6	0	0	0	1.098486	0.792893	0.188769	0.018372539479739	Inf	up
MSTRG.31376.9	0	0	0	55	43	11	0	0	0	0.419152	0.468139	0.083398	0.00178268765893981	Inf	up
MSTRG.32669.7	127	122	170	32	12	28	1.382381	1.13809	2.645113	0.328986	0.175759	0.30679	0.017278044409942	-2.87514088747702	down
MSTRG.32718.1	65	45	121	407	258	312	0.288151	0.168987	0.763044	1.739265	1.564916	1.427862	0.0369729956871657	1.70995553316538	up
MSTRG.33801.6	96	80	65	0	0	0	0.544768	0.388601	0.528049	0	0	0	2.435079794731e-09	-Inf	down
MSTRG.33968.1	160	135	84	27	0	43	1.158182	0.831855	0.863501	0.185791	0	0.315534	0.00836953450602653	-2.69224649349302	down
MSTRG.34133.1	0	0	0	27	9	19	0	0	0	0.653626	0.307649	0.491667	0.0267156038562997	Inf	up
MSTRG.36333.1	0	0	0	112	76	201	0	0	0	0.999285	0.953475	1.920882	6.7706884320135e-07	Inf	up
MSTRG.36333.2	13	4	0	156	43	149	0.06966	0.01838	0	0.807829	0.314693	0.823334	0.00144470655645746	4.22361383250457	up
MSTRG.36615.10	0	0	0	51	14	22	0	0	0	0.652717	0.25364	0.30205	0.00195908332992865	Inf	up
MSTRG.37158.1	10	10	10	67	106	118	0.059689	0.050685	0.083255	0.386622	0.87377	0.736534	0.00633799402866638	3.10232779082439	up
MSTRG.37277.1	369	411	159	133	50	55	7.194452	6.837579	4.429193	2.484449	1.328592	1.105112	0.00737282279974743	-2.19122164669717	down
MSTRG.38771.1	0	1	1	42	13	30	0	0.00257	0.025612	0.824548	0.352803	0.625148	0.0178565009769702	5.03487452599421	up
MSTRG.4.9	1	50	28	235	143	270	0.004713	0.256301	0.238007	1.385258	1.19107	1.704704	0.000771069147336142	2.81355201000401	up
MSTRG.4191.1	5	12	0	76	52	149	0.091357	0.205828	0	1.544178	1.479967	3.244002	0.0312251775617355	4.03720069155321	up
MSTRG.43673.3	9	60	19	0	0	0	0.01876	0.108102	0.055024	0	0	0	0.0219756793953412	-Inf	down
MSTRG.4405.9	69	37	29	0	4	0	0.66542	0.300192	0.39909	0	0.052468	0	0.000575492970199623	-4.98704780520647	down
MSTRG.44568.1	5	3	3	220	209	365	0.117558	0.042497	0.096111	5.203139	7.017514	9.289966	7.85243656477348e-10	5.98256616935352	up
MSTRG.44568.2	23	29	14	187	167	312	0.254385	0.283376	0.213723	2.059474	2.620171	3.702173	0.000438245042426634	3.19577973404252	up
MSTRG.44568.3	0	0	0	24	20	20	0	0	0	0.682935	0.793963	0.60089	0.0109145365914825	Inf	up
MSTRG.44629.1	33	36	22	6	0	0	0.330163	0.307718	0.314654	0.056779	0	0	0.0262305261982536	-4.39223597087963	down
MSTRG.45452.1	127	134	43	7	5	3	0.520539	0.467127	0.250698	0.027053	0.027305	0.012159	1.2024165227947e-05	-4.47392458142953	down
MSTRG.45844.8	24	65	57	0	3	1	0.144057	0.337311	0.49328	0	0.021894	0.001229	0.000931032925132014	-5.22613390758538	down
MSTRG.46700.1	0	0	2	32	25	14	0	0	0.094146	1.131964	1.236958	0.533715	0.0399412729808566	4.55694986365198	up
MSTRG.48223.2	48	112	86	0	0	0	0.403688	0.810759	1.036188	0	0	0	2.435079794731e-09	-Inf	down
MSTRG.4912.7	148	221	345	0	0	0	0.284389	0.361544	0.945934	0	0	0	1.79858482256272e-05	-Inf	down
MSTRG.49718.1	0	0	0	28	76	181	0	0	0	0.600025	2.385716	4.300462	0.0116464145254684	Inf	up
MSTRG.49718.2	0	0	0	40	12	27	0	0	0	0.833428	0.345468	0.591089	0.00355475374233981	Inf	up
MSTRG.50214.1	18	35	23	0	0	0	0.479584	0.799948	0.862591	0	0	0	0.000945851149037814	-Inf	down
MSTRG.53907.1	1	0	0	51	33	41	0.003191	0	0	1.777388	1.589256	1.530229	0.000503279447657499	6.84934669430703	up
MSTRG.54711.1	122	138	107	20	10	31	3.33337	3.237725	4.192488	0.519631	0.345836	0.877556	0.00453241724007389	-2.81716564595993	down
MSTRG.55561.1	3	2	0	32	34	34	0.108326	0.051882	0	1.38248	2.075817	1.583798	0.0322523257660713	4.31140475094542	up
MSTRG.55773.2	0	0	0	130	365	779	0	0	0	1.292973	5.164658	8.334418	0.000368121680331713	Inf	up
MSTRG.56302.5	0	0	0	20	26	18	0	0	0	0.266596	0.506509	0.267143	0.0100504152214991	Inf	up
MSTRG.57248.2	3	2	1	285	260	54	0.035754	0.014301	0.017222	3.416846	4.435981	0.686359	0.0033170846034701	6.50267158145793	up
MSTRG.58597.5	6	0	0	144	47	60	0.021282	0	0	0.57213	0.262103	0.255058	3.56917052298337e-05	5.19793385428679	up
MSTRG.62466.2	127	61	72	0	0	32	1.101664	0.45257	0.891318	0	0	0.278863	0.00355475374233981	-3.20747968377086	down
MSTRG.62671.1	84	146	82	650	233	463	1.348197	2.005788	1.871939	10.112426	5.136815	7.723768	0.0256386679072385	1.86383590908441	up
MSTRG.62748.1	25	15	6	0	0	0	0.571191	0.28895	0.169347	0	0	0	0.0230755977203222	-Inf	down
MSTRG.62809.3	71	35	34	15	0	0	0.659532	0.277323	0.451067	0.135134	0	0	0.0244256142409218	-3.7124545901811	down
MSTRG.6328.1	120	126	72	12	18	35	2.859602	2.544391	2.428784	0.252402	0.582162	0.857611	0.0248803227625693	-2.40896943108655	down
MSTRG.65427.3	46	164	20	367	260	382	0.173464	0.533904	0.107019	1.352598	1.360579	1.511343	0.029473752522373	2.08368402428694	up
MSTRG.65490.1	13	2	2	59	61	52	0.06998	0.006432	0.014504	0.327809	0.480096	0.30827	0.0370121142580336	3.2154317210808	up
MSTRG.78603.1	76	334	229	0	0	31	1.114462	4.2128	4.839457	0	0	0.466933	0.0104172753237626	-4.5551037186228	down
MSTRG.79089.3	16	14	12	0	0	0	0.604466	0.459232	0.626384	0	0	0	0.0312251775617355	-Inf	down
MSTRG.81703.4	23	59	20	0	5	0	0.104231	0.224701	0.128888	0	0.028801	0	0.00910235391317207	-4.20732915637412	down
MSTRG.81747.1	1	5	0	87	41	88	0.011867	0.054568	0	1.071393	0.714328	1.169871	0.000178808421236091	5.16292947644021	up
MSTRG.82254.1	178	181	117	2	6	28	4.192549	3.639968	3.932503	0.044257	0.192087	0.660274	4.64961990583078e-06	-3.8470191536007	down
MSTRG.82451.1	155	233	242	2807	1344	2862	1.590759	2.040224	3.543833	27.834126	18.923029	30.445505	1.88001448657747e-05	3.18408483157185	up
MSTRG.85464.1	20	6	32	186	91	116	0.102866	0.024699	0.240361	0.959924	0.666483	0.64105	0.0155643478437691	2.33922910132271	up
MSTRG.86405.1	117	197	80	3479	1789	3134	4.615889	6.617771	4.466051	132.038147	96.379341	127.600296	4.53453478603948e-08	4.23895182281257	up
MSTRG.87055.1	51	15	17	0	0	0	0.372013	0.093842	0.174549	0	0	0	0.0052457592750777	-Inf	down
MSTRG.87696.1	73	300	176	2	12	1	0.386249	1.358507	1.32911	0.006339	0.082767	0.004573	0.00066702525741105	-5.20260444061669	down
MSTRG.87731.1	0	0	0	52	20	13	0	0	0	1.681662	0.915565	0.422731	0.00212900138403657	Inf	up
MSTRG.87820.1	68	26	27	0	9	2	0.518341	0.165448	0.29217	0	0.093435	0.015877	0.0252401243345309	-3.42249585149069	down
MSTRG.88836.3	0	0	0	21	15	19	0	0	0	0.213268	0.221919	0.21031	0.0244212840967867	Inf	up
MSTRG.89027.1	8	0	0	102	170	234	0.031507	0	0	0.38509	0.909255	0.949978	1.10728715460086e-05	5.94579465320858	up
MSTRG.90783.1	21	7	19	246	80	215	0.311185	0.088851	0.391853	3.601702	1.648519	3.383715	0.000284148713799653	3.16475854640006	up
MSTRG.91236.3	0	0	0	18	24	7	0	0	0	0.320959	0.627493	0.130695	0.0370121142580336	Inf	up
MSTRG.91612.2	0	0	0	77	109	110	0	0	0	1.414595	2.863018	2.177417	2.05691365096612e-09	Inf	up
MSTRG.92164.1	55	1	1	283	191	118	0.596991	0.001574	0.007377	2.995701	2.866508	1.341116	0.000211839009486963	3.24698391555266	up
MSTRG.92784.12	4	18	0	95	53	62	0.024234	0.116255	0	0.712441	0.569346	0.500621	0.0284716970017317	3.24706388682339	up
MSTRG.9283.1	561	464	171	44	73	93	5.090377	3.588636	2.204105	0.384688	0.904994	0.87166	0.00321604739219172	-2.57196294460357	down
MSTRG.94274.1	50	66	56	347	403	485	1.410896	1.604298	2.275743	9.519269	15.680458	14.271562	0.000348924067466986	2.65494720084475	up
MSTRG.94838.1	0	0	0	45	18	14	0	0	0	1.256483	0.702788	0.419976	0.0042908451710543	Inf	up
MSTRG.95182.3	27	39	19	267	93	186	0.233041	0.289286	0.228019	2.229609	1.101582	1.66632	0.00869858383780276	2.45585829780723	up
MSTRG.95438.3	8	102	47	0	0	0	0.031408	0.37757	0.290835	0	0	0	0.0109145365914825	-Inf	down
MSTRG.96611.1	16	0	8	398	367	403	0.063447	0	0.045863	1.591243	2.08108	1.727642	1.34470026057895e-12	5.34053169941478	up
MSTRG.97341.14	29	14	29	0	0	0	0.334286	0.135747	0.486992	0	0	0	0.00116049657812306	-Inf	down
MSTRG.98723.10	762	636	497	26	341	56	2.243281	1.597325	2.087234	0.072663	1.37065	0.16756	0.00143886587561792	-2.14960212120393	down
MSTRG.99417.1	0	0	2	26	50	43	0	0	0.075456	1.064659	2.942816	1.895671	0.00144470655645746	5.3870318901646	up
MSTRG.99965.1	1034	821	510	75	36	53	45.658001	30.925245	32.089848	3.169881	2.142605	2.390243	2.05691365096612e-09	-4.06560517391877	down
