# Supplementary material for: Integrated Analysis of Long Non-coding RNAs (lncRNAs) and mRNAs Reveals the Regulatory Role of lncRNAs Associated With Salt Resistance in Camellia sinensis
Source: Front Plant Sci. 2020 Mar 19;11:218. doi: 10.3389/fpls.2020.00218 (PMC7096555; doi:10.3389/fpls.2020.00218)
Supplement: TABLE S2 — Statistics of cis-target genes of DE-lncRNAs. [file Table_2.xls]

#lncRNA	Genes
MSTRG.52085.2	TEA024365.1_gene;TEA024363.1_gene;TEA024377.1_gene
MSTRG.108721.2	TEA027927.1_gene
MSTRG.68101.1	TEA018320.1_gene;TEA018319.1_gene
MSTRG.103270.1	TEA022618.1_gene;TEA022622.1_gene
MSTRG.93781.1	TEA021814.1_gene
MSTRG.76324.1	TEA023837.1_gene;TEA023836.1_gene
MSTRG.74505.1	TEA024146.1_gene;TEA024145.1_gene
MSTRG.79195.8	TEA006454.1_gene;TEA006462.1_gene
MSTRG.102322.1	TEA013778.1_gene;TEA013773.1_gene;TEA013817.1_gene
MSTRG.72632.1	TEA003965.1_gene;TEA004014.1_gene;TEA004022.1_gene;TEA003996.1_gene;TEA004027.1_gene;TEA004009.1_gene;TEA004021.1_gene
MSTRG.137560.1	TEA023329.1_gene;TEA023309.1_gene;TEA023314.1_gene
MSTRG.142908.2	TEA011405.1_gene;TEA011388.1_gene
MSTRG.91234.1	TEA014843.1_gene
MSTRG.82474.7	TEA014276.1_gene
MSTRG.76278.1	TEA000144.1_gene
MSTRG.113847.1	TEA005064.1_gene;TEA005025.1_gene;TEA005075.1_gene;TEA005069.1_gene;TEA005019.1_gene;TEA005029.1_gene;TEA005042.1_gene
MSTRG.135813.1	TEA007533.1_gene;TEA007546.1_gene;TEA007550.1_gene;TEA007549.1_gene;TEA007539.1_gene;TEA007527.1_gene
MSTRG.38555.1	TEA012699.1_gene;TEA012683.1_gene
MSTRG.126081.2	TEA004482.1_gene
MSTRG.18457.2	TEA019819.1_gene
MSTRG.5320.1	TEA026453.1_gene;TEA026487.1_gene;TEA026462.1_gene;TEA026484.1_gene
MSTRG.145320.18	TEA023221.1_gene
MSTRG.72675.1	TEA004029.1_gene;TEA003968.1_gene;TEA004007.1_gene
MSTRG.51546.7	TEA034003.1_gene;TEA024404.1_gene
MSTRG.127809.1	TEA019989.1_gene;TEA019984.1_gene;TEA019990.1_gene
MSTRG.131117.2	TEA014732.1_gene;TEA014734.1_gene;TEA014731.1_gene
MSTRG.110165.1	TEA021282.1_gene;TEA021280.1_gene;TEA021281.1_gene;TEA021291.1_gene;TEA021288.1_gene;TEA021289.1_gene;TEA021286.1_gene
MSTRG.144911.1	TEA027508.1_gene;TEA027509.1_gene;TEA027526.1_gene
MSTRG.29093.13	TEA005266.1_gene;TEA005264.1_gene;TEA005269.1_gene;TEA005267.1_gene;TEA005268.1_gene;TEA005262.1_gene;TEA005263.1_gene
MSTRG.62178.2	TEA009553.1_gene;TEA009561.1_gene
MSTRG.18489.1	TEA015287.1_gene
MSTRG.151340.1	TEA031529.1_gene
MSTRG.108696.1	TEA027923.1_gene
MSTRG.84666.1	TEA023505.1_gene
MSTRG.59002.1	TEA031214.1_gene
MSTRG.95321.5	TEA004662.1_gene;TEA004663.1_gene;TEA004661.1_gene
MSTRG.151673.1	TEA032659.1_gene;TEA032640.1_gene;TEA032632.1_gene;TEA032633.1_gene;TEA032648.1_gene;TEA032658.1_gene;TEA032641.1_gene
MSTRG.146825.2	TEA003911.1_gene;TEA003922.1_gene;TEA003912.1_gene
MSTRG.98723.10	TEA004068.1_gene
MSTRG.121471.11	TEA030983.1_gene;TEA030982.1_gene
MSTRG.62989.1	TEA030416.1_gene;TEA030414.1_gene;TEA030409.1_gene;TEA030431.1_gene;TEA030418.1_gene;TEA030435.1_gene
MSTRG.111958.1	TEA007458.1_gene;TEA007456.1_gene
MSTRG.38970.1	TEA029056.1_gene;TEA029051.1_gene;TEA029068.1_gene
MSTRG.147296.2	TEA003649.1_gene;TEA003650.1_gene;TEA003647.1_gene;TEA003648.1_gene
MSTRG.133422.1	TEA004592.1_gene;TEA004601.1_gene;TEA004596.1_gene;TEA004599.1_gene
MSTRG.47573.2	TEA021745.1_gene;TEA021747.1_gene
MSTRG.50876.6	TEA008656.1_gene;TEA008662.1_gene;TEA008655.1_gene;TEA008661.1_gene
MSTRG.138229.1	TEA028640.1_gene
MSTRG.80591.12	TEA012225.1_gene;TEA012233.1_gene;TEA012231.1_gene;TEA012226.1_gene
MSTRG.1718.1	TEA016025.1_gene
MSTRG.62355.8	TEA032598.1_gene;TEA032604.1_gene;TEA032597.1_gene;TEA032591.1_gene
MSTRG.4205.1	TEA004816.1_gene
MSTRG.53735.2	TEA027849.1_gene;TEA027866.1_gene;TEA027841.1_gene;TEA027854.1_gene;TEA027851.1_gene
MSTRG.18330.1	TEA031452.1_gene;TEA031446.1_gene
MSTRG.107185.1	TEA023234.1_gene;TEA023235.1_gene
MSTRG.25659.2	TEA007931.1_gene;TEA007922.1_gene;TEA007924.1_gene
MSTRG.10122.1	TEA032823.1_gene;TEA032825.1_gene;TEA032828.1_gene
MSTRG.2629.1	TEA029455.1_gene
MSTRG.141069.1	TEA006707.1_gene;TEA006699.1_gene;TEA006704.1_gene;TEA006702.1_gene;TEA006701.1_gene;TEA006710.1_gene;TEA006703.1_gene
MSTRG.51627.11	TEA002969.1_gene;TEA002964.1_gene;TEA002968.1_gene
MSTRG.20422.1	TEA012356.1_gene;TEA012359.1_gene;TEA012355.1_gene
MSTRG.151495.1	TEA003236.1_gene
MSTRG.16794.1	TEA003407.1_gene;TEA003404.1_gene;TEA003409.1_gene;TEA003406.1_gene
MSTRG.133358.1	TEA004591.1_gene;TEA004589.1_gene;TEA004593.1_gene;TEA004595.1_gene;TEA004588.1_gene;TEA004598.1_gene
MSTRG.117593.1	TEA023577.1_gene;TEA023580.1_gene;TEA023573.1_gene;TEA023575.1_gene;TEA023578.1_gene
MSTRG.142513.1	TEA008297.1_gene;TEA008295.1_gene;TEA008294.1_gene;TEA008298.1_gene
MSTRG.41845.1	TEA016600.1_gene;TEA016608.1_gene
MSTRG.107109.1	TEA011072.1_gene
MSTRG.129482.1	TEA019339.1_gene;TEA019342.1_gene
MSTRG.17568.4	TEA002531.1_gene;TEA002513.1_gene;TEA002517.1_gene;TEA002529.1_gene
MSTRG.27642.1	TEA013979.1_gene;TEA013973.1_gene;TEA013932.1_gene;TEA013957.1_gene;TEA013952.1_gene
MSTRG.37353.1	TEA004141.1_gene;TEA004142.1_gene;TEA004139.1_gene;TEA004140.1_gene;TEA004137.1_gene
MSTRG.47202.3	TEA015611.1_gene;TEA015619.1_gene;TEA015633.1_gene;TEA015632.1_gene;TEA015621.1_gene
MSTRG.92192.1	TEA007402.1_gene;TEA007396.1_gene;TEA007400.1_gene
MSTRG.139176.1	TEA005273.1_gene;TEA005275.1_gene
MSTRG.128752.1	TEA007799.1_gene;TEA007803.1_gene;TEA007801.1_gene;TEA007794.1_gene;TEA007786.1_gene;TEA007788.1_gene;TEA007790.1_gene
MSTRG.62356.2	TEA032604.1_gene;TEA032597.1_gene;TEA032598.1_gene;TEA032591.1_gene
MSTRG.42023.4	TEA006244.1_gene;TEA006246.1_gene
MSTRG.20589.1	TEA028526.1_gene;TEA028515.1_gene;TEA028518.1_gene;TEA028529.1_gene;TEA028522.1_gene
MSTRG.138024.1	TEA013710.1_gene;TEA013717.1_gene;TEA013734.1_gene
MSTRG.89471.1	TEA025555.1_gene;TEA025567.1_gene;TEA025559.1_gene;TEA025564.1_gene;TEA025563.1_gene;TEA025551.1_gene;TEA025539.1_gene;TEA025522.1_gene;TEA025530.1_gene
MSTRG.93902.2	TEA023752.1_gene;TEA023763.1_gene;TEA023765.1_gene;TEA023761.1_gene;TEA023754.1_gene
MSTRG.57852.1	TEA009729.1_gene;TEA009733.1_gene;TEA009735.1_gene;TEA009734.1_gene
MSTRG.123078.1	TEA013345.1_gene
MSTRG.118395.2	TEA005164.1_gene
MSTRG.119297.3	TEA027542.1_gene;TEA027540.1_gene;TEA027544.1_gene
MSTRG.84320.1	TEA022467.1_gene;TEA022475.1_gene;TEA022474.1_gene;TEA022472.1_gene;TEA022465.1_gene;TEA022468.1_gene
MSTRG.553.1	TEA018653.1_gene;TEA018667.1_gene;TEA018651.1_gene;TEA018654.1_gene
MSTRG.115309.5	TEA011136.1_gene;TEA011138.1_gene;TEA011134.1_gene
MSTRG.15534.1	TEA019788.1_gene
MSTRG.21609.1	TEA032447.1_gene;TEA032449.1_gene;TEA032450.1_gene
MSTRG.140377.1	TEA000957.1_gene;TEA000958.1_gene
MSTRG.102899.3	TEA016804.1_gene;TEA016802.1_gene;TEA016806.1_gene;TEA016809.1_gene;TEA016811.1_gene
MSTRG.99718.1	TEA013549.1_gene;TEA013548.1_gene;TEA013541.1_gene
MSTRG.11629.1	TEA000114.1_gene
MSTRG.40849.4	TEA011773.1_gene;TEA011776.1_gene;TEA011770.1_gene
MSTRG.132990.1	TEA013334.1_gene
MSTRG.117006.2	TEA026771.1_gene;TEA026770.1_gene;TEA026782.1_gene;TEA026776.1_gene
MSTRG.44042.23	TEA024114.1_gene;TEA024118.1_gene;TEA024125.1_gene;TEA024123.1_gene
MSTRG.17264.2	TEA004240.1_gene
MSTRG.97053.1	TEA002353.1_gene;TEA002352.1_gene;TEA002345.1_gene;TEA002354.1_gene;TEA002350.1_gene;TEA002344.1_gene
MSTRG.105237.1	TEA008865.1_gene;TEA008870.1_gene
MSTRG.126995.6	TEA018255.1_gene
MSTRG.94573.1	TEA033793.1_gene;TEA033803.1_gene;TEA033796.1_gene;TEA033788.1_gene
MSTRG.136365.3	TEA020562.1_gene;TEA020565.1_gene;TEA020563.1_gene;TEA020561.1_gene
MSTRG.37019.1	TEA017594.1_gene;TEA017606.1_gene;TEA017588.1_gene;TEA017617.1_gene;TEA017581.1_gene;TEA017602.1_gene
MSTRG.132618.1	TEA005467.1_gene;TEA005484.1_gene;TEA005476.1_gene
MSTRG.21929.1	TEA009293.1_gene;TEA009306.1_gene;TEA009299.1_gene;TEA009313.1_gene
MSTRG.95076.1	TEA008491.1_gene
MSTRG.43594.1	TEA032541.1_gene;TEA032540.1_gene;TEA032539.1_gene;TEA032538.1_gene
MSTRG.56838.1	TEA032755.1_gene;TEA032758.1_gene;TEA032754.1_gene;TEA032748.1_gene;TEA032736.1_gene;TEA032759.1_gene;TEA032735.1_gene
MSTRG.88573.1	TEA021633.1_gene;TEA021639.1_gene;TEA021650.1_gene;TEA021648.1_gene
MSTRG.135814.1	TEA007546.1_gene;TEA007550.1_gene;TEA007536.1_gene;TEA007533.1_gene;TEA007527.1_gene;TEA007539.1_gene;TEA007538.1_gene
MSTRG.835.1	TEA000988.1_gene;TEA000980.1_gene;TEA000981.1_gene;TEA000975.1_gene
MSTRG.87171.9	TEA026168.1_gene;TEA026177.1_gene;TEA026169.1_gene
MSTRG.106618.1	TEA013104.1_gene
MSTRG.113755.1	TEA005031.1_gene;TEA005015.1_gene;TEA005037.1_gene;TEA005054.1_gene;TEA005067.1_gene
MSTRG.16831.1	TEA026967.1_gene
MSTRG.52348.3	TEA022699.1_gene;TEA022701.1_gene
MSTRG.152496.2	TEA028547.1_gene;TEA028554.1_gene
MSTRG.104577.1	TEA016279.1_gene;TEA016260.1_gene;TEA016262.1_gene;TEA016250.1_gene;TEA016264.1_gene;TEA016282.1_gene;TEA016290.1_gene;TEA016269.1_gene;TEA016278.1_gene
MSTRG.132657.1	TEA024943.1_gene;TEA024944.1_gene;TEA024941.1_gene;TEA024945.1_gene;TEA024928.1_gene;TEA024942.1_gene;TEA024927.1_gene
MSTRG.69428.1	TEA026560.1_gene;TEA026572.1_gene;TEA026570.1_gene;TEA026550.1_gene;TEA026558.1_gene;TEA026565.1_gene;TEA026544.1_gene;TEA026562.1_gene;TEA026542.1_gene
MSTRG.68497.2	TEA020738.1_gene;TEA020751.1_gene
MSTRG.129836.1	TEA011051.1_gene;TEA011054.1_gene
MSTRG.61543.2	TEA001139.1_gene;TEA001131.1_gene
MSTRG.114778.3	TEA002818.1_gene;TEA002803.1_gene;TEA002819.1_gene;TEA002807.1_gene;TEA002840.1_gene;TEA002820.1_gene
MSTRG.36344.3	TEA019327.1_gene;TEA019313.1_gene;TEA019330.1_gene;TEA019320.1_gene
MSTRG.36615.10	TEA029140.1_gene
MSTRG.81151.1	TEA017366.1_gene;TEA017371.1_gene;TEA017359.1_gene;TEA017368.1_gene;TEA017363.1_gene
MSTRG.37957.3	TEA005150.1_gene;TEA005137.1_gene;TEA005133.1_gene;TEA005126.1_gene
MSTRG.21666.3	TEA020801.1_gene;TEA020802.1_gene;TEA020789.1_gene;TEA020798.1_gene;TEA020795.1_gene
MSTRG.134980.4	TEA008210.1_gene
MSTRG.15736.3	TEA013571.1_gene;TEA013569.1_gene
MSTRG.50120.1	TEA015837.1_gene;TEA015845.1_gene
MSTRG.34925.2	TEA009681.1_gene;TEA009689.1_gene;TEA009678.1_gene;TEA009686.1_gene;TEA009690.1_gene
MSTRG.44381.1	TEA019643.1_gene;TEA019642.1_gene
MSTRG.37499.16	TEA004509.1_gene;TEA004510.1_gene
MSTRG.27158.2	TEA019452.1_gene;TEA019477.1_gene;TEA019478.1_gene;TEA019453.1_gene;TEA019466.1_gene
MSTRG.100251.1	TEA011664.1_gene
MSTRG.105949.1	TEA004130.1_gene;TEA004132.1_gene;TEA004133.1_gene;TEA004123.1_gene
MSTRG.84067.1	TEA013260.1_gene;TEA013253.1_gene
MSTRG.47573.1	TEA021745.1_gene;TEA021747.1_gene
MSTRG.92784.11	TEA028800.1_gene
MSTRG.87219.2	TEA028568.1_gene
MSTRG.79240.1	TEA004794.1_gene;TEA004791.1_gene
MSTRG.149898.1	TEA007841.1_gene;TEA007837.1_gene;TEA007829.1_gene;TEA007827.1_gene;TEA007830.1_gene
MSTRG.31189.1	TEA027730.1_gene
MSTRG.54458.2	TEA001967.1_gene
MSTRG.126353.1	TEA001752.1_gene;TEA001743.1_gene;TEA001745.1_gene
MSTRG.132899.1	TEA000497.1_gene;TEA000494.1_gene;TEA000491.1_gene;TEA000481.1_gene
MSTRG.88554.1	TEA021646.1_gene;TEA021660.1_gene;TEA021643.1_gene;TEA021636.1_gene;TEA021651.1_gene;TEA021653.1_gene;TEA021645.1_gene
MSTRG.16713.1	TEA026158.1_gene
MSTRG.21482.2	TEA023368.1_gene;TEA023384.1_gene;TEA023380.1_gene;TEA023363.1_gene;TEA023365.1_gene;TEA023382.1_gene;TEA023381.1_gene;TEA023383.1_gene;TEA023376.1_gene;TEA023369.1_gene;TEA023362.1_gene
MSTRG.99244.1	TEA016207.1_gene;TEA016233.1_gene;TEA016182.1_gene;TEA016209.1_gene;TEA016173.1_gene
MSTRG.85982.3	TEA010820.1_gene;TEA010816.1_gene;TEA010819.1_gene;TEA010810.1_gene;TEA010823.1_gene;TEA010804.1_gene;TEA010792.1_gene;TEA010802.1_gene
MSTRG.10220.6	TEA006200.1_gene
MSTRG.123968.1	TEA013886.1_gene;TEA013916.1_gene;TEA013890.1_gene;TEA013915.1_gene;TEA013894.1_gene
MSTRG.59755.1	TEA007111.1_gene
MSTRG.138112.17	TEA003616.1_gene;TEA003623.1_gene;TEA003625.1_gene;TEA003624.1_gene;TEA003615.1_gene;TEA003620.1_gene
MSTRG.125010.1	TEA019775.1_gene;TEA019767.1_gene;TEA019765.1_gene;TEA019774.1_gene;TEA019760.1_gene;TEA019777.1_gene
MSTRG.16906.1	TEA009279.1_gene;TEA009281.1_gene
MSTRG.58830.1	TEA016339.1_gene;TEA016368.1_gene;TEA016325.1_gene;TEA016373.1_gene;TEA016357.1_gene;TEA016331.1_gene;TEA016348.1_gene
MSTRG.99771.1	TEA006391.1_gene;TEA006390.1_gene
MSTRG.43275.1	TEA009518.1_gene;TEA009516.1_gene;TEA009514.1_gene
MSTRG.46844.1	TEA007271.1_gene;TEA007254.1_gene;TEA007267.1_gene
MSTRG.113434.1	TEA023582.1_gene;TEA023605.1_gene;TEA023603.1_gene;TEA023592.1_gene;TEA023618.1_gene;TEA023601.1_gene
MSTRG.81599.1	TEA017818.1_gene;TEA017824.1_gene;TEA017829.1_gene;TEA017826.1_gene;TEA017827.1_gene
MSTRG.154922.1	TEA010606.1_gene;TEA010579.1_gene;TEA010595.1_gene;TEA010598.1_gene
MSTRG.25340.1	TEA028965.1_gene;TEA028954.1_gene;TEA028964.1_gene;TEA028977.1_gene
MSTRG.8081.1	TEA025490.1_gene;TEA025496.1_gene;TEA025498.1_gene
MSTRG.89377.1	TEA025547.1_gene;TEA025541.1_gene
MSTRG.108765.1	TEA010934.1_gene;TEA010937.1_gene;TEA010936.1_gene;TEA010938.1_gene;TEA010943.1_gene;TEA010942.1_gene;TEA010941.1_gene
MSTRG.104246.1	TEA005299.1_gene;TEA005293.1_gene;TEA005284.1_gene;TEA005279.1_gene;TEA005296.1_gene
MSTRG.127921.1	TEA009273.1_gene
MSTRG.154726.2	TEA022861.1_gene
MSTRG.90772.3	TEA026062.1_gene;TEA026076.1_gene;TEA026074.1_gene;TEA026068.1_gene;TEA026070.1_gene
MSTRG.17971.1	TEA032081.1_gene;TEA032092.1_gene;TEA032099.1_gene;TEA032084.1_gene
MSTRG.148440.1	TEA007853.1_gene
MSTRG.100538.2	TEA003042.1_gene;TEA003040.1_gene;TEA003044.1_gene
MSTRG.33805.1	TEA012729.1_gene;TEA012719.1_gene
MSTRG.5461.1	TEA020186.1_gene
MSTRG.142538.1	TEA032260.1_gene;TEA032261.1_gene
MSTRG.125813.2	TEA009112.1_gene;TEA009108.1_gene;TEA009115.1_gene;TEA009104.1_gene;TEA009116.1_gene;TEA009117.1_gene;TEA009114.1_gene;TEA009110.1_gene;TEA009113.1_gene;TEA009105.1_gene
MSTRG.121197.1	TEA012609.1_gene;TEA012605.1_gene
MSTRG.109736.2	TEA011989.1_gene;TEA011985.1_gene
MSTRG.129035.5	TEA008240.1_gene
MSTRG.75877.1	TEA024772.1_gene;TEA024792.1_gene;TEA024771.1_gene;TEA024777.1_gene;TEA024785.1_gene;TEA024789.1_gene
MSTRG.14137.1	TEA009592.1_gene;TEA009606.1_gene
MSTRG.123680.1	TEA003684.1_gene;TEA003700.1_gene;TEA003703.1_gene
MSTRG.45182.9	TEA023336.1_gene
MSTRG.88254.1	TEA013398.1_gene;TEA013387.1_gene
MSTRG.108251.1	TEA012622.1_gene;TEA012621.1_gene;TEA012631.1_gene;TEA012613.1_gene
MSTRG.14722.2	TEA010177.1_gene;TEA010178.1_gene;TEA010168.1_gene;TEA010171.1_gene;TEA010172.1_gene;TEA010176.1_gene;TEA010167.1_gene
MSTRG.2010.2	TEA016705.1_gene;TEA016707.1_gene
MSTRG.54771.1	TEA022063.1_gene;TEA022070.1_gene;TEA022078.1_gene;TEA022068.1_gene;TEA022077.1_gene;TEA022067.1_gene;TEA022075.1_gene;TEA022071.1_gene;TEA022069.1_gene
MSTRG.106270.1	TEA033136.1_gene;TEA033142.1_gene;TEA033131.1_gene;TEA033144.1_gene;TEA033145.1_gene;TEA033132.1_gene
MSTRG.44449.6	TEA010270.1_gene
MSTRG.34183.2	TEA031108.1_gene;TEA031106.1_gene
MSTRG.51546.4	TEA034003.1_gene;TEA024404.1_gene
MSTRG.106920.3	TEA018413.1_gene
MSTRG.109916.1	TEA014690.1_gene
MSTRG.111224.1	TEA000435.1_gene;TEA000437.1_gene;TEA000436.1_gene
MSTRG.88671.1	TEA000790.1_gene;TEA000788.1_gene;TEA000779.1_gene
MSTRG.59398.1	TEA018062.1_gene;TEA018076.1_gene;TEA018071.1_gene;TEA018057.1_gene;TEA018079.1_gene;TEA018072.1_gene
MSTRG.76817.2	TEA015376.1_gene;TEA015387.1_gene;TEA015391.1_gene
MSTRG.73126.1	TEA014290.1_gene;TEA014292.1_gene;TEA014291.1_gene;TEA014293.1_gene
MSTRG.147687.5	TEA020658.1_gene;TEA020660.1_gene;TEA020662.1_gene;TEA020665.1_gene
MSTRG.28503.1	TEA012095.1_gene;TEA012093.1_gene;TEA012088.1_gene;TEA012099.1_gene;TEA012087.1_gene
MSTRG.68755.1	TEA026046.1_gene;TEA026040.1_gene;TEA026050.1_gene;TEA026043.1_gene;TEA026027.1_gene;TEA026037.1_gene
MSTRG.50722.1	TEA001706.1_gene;TEA001722.1_gene;TEA001720.1_gene;TEA001721.1_gene
MSTRG.96895.1	TEA013170.1_gene;TEA013167.1_gene;TEA013176.1_gene
MSTRG.103283.14	TEA033779.1_gene;TEA033781.1_gene;TEA033782.1_gene;TEA033777.1_gene
MSTRG.138134.1	TEA001560.1_gene;TEA001559.1_gene
MSTRG.70273.6	TEA011941.1_gene;TEA011936.1_gene;TEA011945.1_gene;TEA011912.1_gene
MSTRG.133669.2	TEA030253.1_gene;TEA030238.1_gene
MSTRG.54336.4	TEA015913.1_gene
MSTRG.62315.1	TEA032599.1_gene;TEA032602.1_gene
MSTRG.37870.1	TEA005101.1_gene;TEA005143.1_gene
MSTRG.114838.1	TEA002823.1_gene;TEA002838.1_gene;TEA002799.1_gene;TEA002810.1_gene;TEA002833.1_gene
MSTRG.54486.2	TEA001969.1_gene;TEA001965.1_gene
MSTRG.112747.2	TEA024975.1_gene
MSTRG.134438.1	TEA014901.1_gene
MSTRG.146047.1	TEA017071.1_gene;TEA017070.1_gene
MSTRG.131328.1	TEA030476.1_gene
MSTRG.40866.1	TEA011776.1_gene;TEA011769.1_gene;TEA011765.1_gene
MSTRG.149893.1	TEA007830.1_gene;TEA007838.1_gene;TEA007827.1_gene;TEA007841.1_gene;TEA007829.1_gene;TEA007837.1_gene
MSTRG.13031.2	TEA000304.1_gene;TEA000311.1_gene
MSTRG.94785.1	TEA031436.1_gene;TEA031423.1_gene
MSTRG.72962.1	TEA008732.1_gene;TEA008731.1_gene;TEA008728.1_gene
MSTRG.33305.6	TEA026495.1_gene
MSTRG.89840.1	TEA018557.1_gene
MSTRG.8720.1	TEA002487.1_gene
MSTRG.37905.3	TEA005110.1_gene;TEA005132.1_gene;TEA005151.1_gene;TEA005144.1_gene;TEA005131.1_gene
MSTRG.103657.1	TEA021211.1_gene;TEA021227.1_gene;TEA021219.1_gene;TEA021209.1_gene;TEA021225.1_gene;TEA021213.1_gene;TEA021207.1_gene
MSTRG.143537.1	TEA019727.1_gene
MSTRG.68504.2	TEA020748.1_gene;TEA020758.1_gene;TEA020759.1_gene
MSTRG.90063.1	TEA011410.1_gene;TEA011421.1_gene
MSTRG.32107.1	TEA021882.1_gene;TEA021871.1_gene;TEA021887.1_gene
MSTRG.151293.1	TEA031518.1_gene;TEA031509.1_gene;TEA031494.1_gene;TEA031502.1_gene
MSTRG.57218.2	TEA010309.1_gene
MSTRG.24965.6	TEA026540.1_gene
MSTRG.11863.1	TEA020157.1_gene;TEA020154.1_gene;TEA020155.1_gene;TEA020156.1_gene
MSTRG.70847.1	TEA033365.1_gene;TEA033352.1_gene
MSTRG.88342.2	TEA013395.1_gene;TEA013396.1_gene
MSTRG.145196.1	TEA020414.1_gene
MSTRG.81485.1	TEA027436.1_gene
MSTRG.148401.1	TEA007849.1_gene;TEA007858.1_gene
MSTRG.61633.1	TEA001597.1_gene;TEA001647.1_gene;TEA001628.1_gene
MSTRG.29415.1	TEA026618.1_gene;TEA026621.1_gene
MSTRG.43084.1	TEA002896.1_gene
MSTRG.98305.1	TEA021989.1_gene
MSTRG.73469.2	TEA027098.1_gene;TEA027086.1_gene
MSTRG.106204.1	TEA010210.1_gene
MSTRG.14023.1	TEA001189.1_gene;TEA001194.1_gene;TEA001199.1_gene
MSTRG.7011.8	TEA004064.1_gene
MSTRG.151261.1	TEA033471.1_gene;TEA033467.1_gene;TEA033470.1_gene
MSTRG.133497.1	TEA000591.1_gene
MSTRG.6455.11	TEA028644.1_gene;TEA028645.1_gene
MSTRG.83030.1	TEA012308.1_gene;TEA012284.1_gene;TEA012306.1_gene;TEA012283.1_gene;TEA012299.1_gene;TEA012304.1_gene;TEA012300.1_gene;TEA012278.1_gene
MSTRG.103296.1	TEA033771.1_gene;TEA033779.1_gene;TEA033773.1_gene
MSTRG.109012.1	TEA001891.1_gene;TEA001883.1_gene
MSTRG.92743.1	TEA024750.1_gene;TEA024749.1_gene;TEA024752.1_gene;TEA024751.1_gene
MSTRG.150840.1	TEA019693.1_gene
MSTRG.89508.9	TEA025523.1_gene;TEA025526.1_gene;TEA025568.1_gene;TEA025583.1_gene;TEA025540.1_gene
MSTRG.43957.1	TEA024111.1_gene
MSTRG.108437.1	TEA031887.1_gene;TEA031877.1_gene;TEA031897.1_gene;TEA031889.1_gene;TEA031885.1_gene
MSTRG.83253.1	TEA016009.1_gene;TEA016019.1_gene
MSTRG.67009.1	TEA004764.1_gene;TEA004759.1_gene;TEA004766.1_gene
MSTRG.154123.1	TEA028375.1_gene
MSTRG.87712.2	TEA007412.1_gene;TEA007416.1_gene
MSTRG.102879.1	TEA016799.1_gene;TEA016798.1_gene
MSTRG.30921.1	TEA006413.1_gene
MSTRG.100915.3	TEA003796.1_gene;TEA003795.1_gene;TEA003806.1_gene;TEA003803.1_gene
MSTRG.7628.1	TEA012895.1_gene;TEA012875.1_gene
MSTRG.111291.1	TEA006077.1_gene
MSTRG.93778.7	TEA021814.1_gene
MSTRG.110558.2	TEA013311.1_gene;TEA013313.1_gene
MSTRG.51800.1	TEA021097.1_gene;TEA021109.1_gene;TEA021102.1_gene;TEA021070.1_gene;TEA021096.1_gene
MSTRG.4191.1	TEA001892.1_gene
MSTRG.27827.2	TEA031839.1_gene;TEA031837.1_gene
MSTRG.16689.1	TEA018890.1_gene;TEA018889.1_gene;TEA018881.1_gene
MSTRG.123246.2	TEA029374.1_gene
MSTRG.33700.1	TEA012721.1_gene
MSTRG.14082.1	TEA001197.1_gene;TEA001147.1_gene;TEA001176.1_gene;TEA001159.1_gene;TEA001180.1_gene
MSTRG.61344.5	TEA022280.1_gene;TEA022281.1_gene
MSTRG.56086.2	TEA026675.1_gene;TEA026659.1_gene;TEA026654.1_gene;TEA026662.1_gene;TEA026677.1_gene
MSTRG.2555.13	TEA029449.1_gene;TEA029444.1_gene
MSTRG.96964.1	TEA007377.1_gene
MSTRG.29553.1	TEA014233.1_gene;TEA014241.1_gene
MSTRG.152850.1	TEA033566.1_gene
MSTRG.117675.3	TEA007001.1_gene
MSTRG.45034.1	TEA023118.1_gene;TEA023132.1_gene;TEA023139.1_gene;TEA023137.1_gene;TEA023119.1_gene;TEA023144.1_gene;TEA023150.1_gene;TEA023133.1_gene;TEA023127.1_gene;TEA023120.1_gene
MSTRG.121786.1	TEA027343.1_gene;TEA027346.1_gene;TEA027342.1_gene
MSTRG.98894.21	TEA011123.1_gene;TEA011121.1_gene
MSTRG.108118.1	TEA011575.1_gene;TEA011578.1_gene;TEA011581.1_gene
MSTRG.69526.2	TEA018429.1_gene;TEA018445.1_gene;TEA018437.1_gene;TEA018441.1_gene;TEA018424.1_gene
MSTRG.125857.1	TEA009043.1_gene;TEA009038.1_gene;TEA009039.1_gene;TEA009040.1_gene
MSTRG.79444.1	TEA029160.1_gene
MSTRG.62757.20	TEA028059.1_gene
MSTRG.45703.6	TEA010634.1_gene;TEA010620.1_gene;TEA010633.1_gene;TEA010625.1_gene
MSTRG.150730.13	TEA007958.1_gene;TEA007952.1_gene;TEA007960.1_gene;TEA007955.1_gene
MSTRG.123345.5	TEA010576.1_gene;TEA010577.1_gene;TEA010574.1_gene;TEA010578.1_gene
MSTRG.116694.12	TEA025676.1_gene;TEA025670.1_gene;TEA025671.1_gene;TEA025669.1_gene;TEA025674.1_gene
MSTRG.104858.1	TEA007904.1_gene;TEA007894.1_gene;TEA007897.1_gene
MSTRG.79542.1	TEA007734.1_gene;TEA007729.1_gene;TEA007728.1_gene
MSTRG.35777.4	TEA009723.1_gene;TEA009719.1_gene
MSTRG.115232.2	TEA011488.1_gene
MSTRG.145896.1	TEA003009.1_gene;TEA003004.1_gene
MSTRG.135343.1	TEA010676.1_gene;TEA010673.1_gene;TEA010681.1_gene
MSTRG.140845.2	TEA017446.1_gene
MSTRG.37957.1	TEA005137.1_gene;TEA005126.1_gene;TEA005133.1_gene;TEA005150.1_gene
MSTRG.69160.1	TEA031536.1_gene;TEA031533.1_gene
MSTRG.101468.1	TEA002961.1_gene;TEA002958.1_gene
MSTRG.18392.14	TEA028278.1_gene;TEA028290.1_gene
MSTRG.56993.6	TEA000148.1_gene;TEA000170.1_gene;TEA000166.1_gene;TEA000168.1_gene
MSTRG.100868.1	TEA003801.1_gene;TEA003804.1_gene;TEA003800.1_gene
MSTRG.134096.1	TEA010006.1_gene;TEA010012.1_gene;TEA010011.1_gene
MSTRG.40129.1	TEA021581.1_gene;TEA021580.1_gene;TEA021576.1_gene;TEA021582.1_gene
MSTRG.21699.1	TEA020800.1_gene;TEA020790.1_gene;TEA020784.1_gene;TEA020788.1_gene
MSTRG.5838.2	TEA009501.1_gene;TEA009493.1_gene;TEA009500.1_gene
MSTRG.93778.44	TEA021814.1_gene
MSTRG.22154.1	TEA026336.1_gene;TEA026325.1_gene;TEA026339.1_gene
MSTRG.33536.1	TEA005556.1_gene;TEA005543.1_gene;TEA005541.1_gene
MSTRG.91036.6	TEA005878.1_gene;TEA005934.1_gene;TEA005897.1_gene;TEA005885.1_gene
MSTRG.1211.2	TEA011494.1_gene
MSTRG.55091.1	TEA008245.1_gene;TEA008273.1_gene;TEA008248.1_gene;TEA008262.1_gene;TEA008282.1_gene
MSTRG.152574.1	TEA004291.1_gene;TEA004294.1_gene;TEA004293.1_gene
MSTRG.134587.1	TEA027467.1_gene;TEA027484.1_gene;TEA027495.1_gene
MSTRG.59654.1	TEA032525.1_gene;TEA032524.1_gene;TEA032537.1_gene;TEA032527.1_gene
MSTRG.101109.1	TEA025212.1_gene;TEA025225.1_gene
MSTRG.21027.1	TEA010566.1_gene;TEA010569.1_gene
MSTRG.121195.2	TEA012605.1_gene;TEA012609.1_gene
MSTRG.26800.1	TEA030870.1_gene;TEA030872.1_gene
MSTRG.12721.1	TEA016850.1_gene;TEA016851.1_gene;TEA016857.1_gene;TEA016846.1_gene
MSTRG.18399.3	TEA028289.1_gene
MSTRG.75510.2	TEA008789.1_gene;TEA008765.1_gene
MSTRG.142703.1	TEA020340.1_gene;TEA020342.1_gene;TEA020325.1_gene;TEA020332.1_gene
MSTRG.19609.1	TEA032583.1_gene;TEA032582.1_gene;TEA032581.1_gene
MSTRG.116667.1	TEA007164.1_gene
MSTRG.52007.2	TEA024383.1_gene;TEA024358.1_gene;TEA024373.1_gene;TEA024369.1_gene
MSTRG.38908.1	TEA025456.1_gene;TEA025461.1_gene;TEA025459.1_gene;TEA025467.1_gene
MSTRG.9720.1	TEA010554.1_gene
MSTRG.81235.1	TEA014242.1_gene
MSTRG.53068.1	TEA003024.1_gene
MSTRG.101070.1	TEA024591.1_gene;TEA024572.1_gene;TEA024588.1_gene
MSTRG.11925.1	TEA000416.1_gene;TEA000417.1_gene;TEA000425.1_gene;TEA000424.1_gene;TEA000421.1_gene
MSTRG.132473.1	TEA010533.1_gene;TEA010534.1_gene
MSTRG.107600.3	TEA015567.1_gene
MSTRG.51740.3	TEA021099.1_gene;TEA021089.1_gene;TEA021064.1_gene
MSTRG.29422.1	TEA026634.1_gene;TEA026627.1_gene;TEA026626.1_gene;TEA026614.1_gene;TEA026635.1_gene
MSTRG.65490.3	TEA006568.1_gene;TEA006592.1_gene;TEA006601.1_gene;TEA006590.1_gene
MSTRG.66463.1	TEA013840.1_gene;TEA013852.1_gene;TEA013853.1_gene;TEA013832.1_gene;TEA013833.1_gene;TEA013846.1_gene;TEA013844.1_gene
MSTRG.45766.1	TEA005969.1_gene;TEA005955.1_gene
MSTRG.124172.1	TEA020243.1_gene;TEA020235.1_gene;TEA020241.1_gene;TEA020250.1_gene
MSTRG.45716.2	TEA032557.1_gene;TEA032556.1_gene;TEA032560.1_gene
MSTRG.9335.2	TEA005387.1_gene;TEA005389.1_gene
MSTRG.127081.2	TEA020454.1_gene;TEA020453.1_gene;TEA020457.1_gene;TEA020450.1_gene;TEA020461.1_gene;TEA020462.1_gene;TEA020458.1_gene
MSTRG.42038.1	TEA006256.1_gene
MSTRG.8323.1	TEA032151.1_gene;TEA032139.1_gene
MSTRG.6135.1	TEA021950.1_gene;TEA021952.1_gene;TEA021953.1_gene;TEA021955.1_gene;TEA021967.1_gene;TEA021958.1_gene;TEA021951.1_gene;TEA021964.1_gene
MSTRG.127443.5	TEA021508.1_gene;TEA021512.1_gene
MSTRG.73669.1	TEA021022.1_gene
MSTRG.68372.3	TEA020742.1_gene;TEA020746.1_gene;TEA020756.1_gene;TEA020731.1_gene;TEA020743.1_gene;TEA020749.1_gene;TEA020762.1_gene
MSTRG.92784.2	TEA028800.1_gene
MSTRG.133324.1	TEA024921.1_gene
MSTRG.130738.1	TEA029849.1_gene
MSTRG.135441.1	TEA003157.1_gene;TEA003160.1_gene;TEA003158.1_gene
MSTRG.65114.2	TEA004205.1_gene;TEA004213.1_gene;TEA004209.1_gene;TEA004215.1_gene;TEA004208.1_gene
MSTRG.99686.1	TEA013530.1_gene;TEA013550.1_gene;TEA013555.1_gene;TEA013528.1_gene;TEA013534.1_gene;TEA013544.1_gene
MSTRG.63974.3	TEA010713.1_gene;TEA010708.1_gene
MSTRG.554.1	TEA018651.1_gene;TEA018667.1_gene;TEA018653.1_gene;TEA018654.1_gene
MSTRG.107806.1	TEA029409.1_gene;TEA029410.1_gene;TEA029405.1_gene
MSTRG.147467.3	TEA026848.1_gene;TEA026811.1_gene;TEA026810.1_gene;TEA026850.1_gene
MSTRG.64441.1	TEA023567.1_gene;TEA023568.1_gene;TEA023570.1_gene
MSTRG.149772.2	TEA023942.1_gene;TEA023934.1_gene;TEA023947.1_gene;TEA023957.1_gene;TEA023958.1_gene
MSTRG.142593.1	TEA020339.1_gene;TEA020343.1_gene;TEA020349.1_gene;TEA020363.1_gene;TEA020347.1_gene
MSTRG.121996.1	TEA004431.1_gene;TEA004403.1_gene;TEA004408.1_gene;TEA004417.1_gene
MSTRG.1660.1	TEA000731.1_gene
MSTRG.1717.1	TEA016025.1_gene
MSTRG.102951.3	TEA020135.1_gene;TEA020131.1_gene;TEA020132.1_gene
MSTRG.76832.1	TEA015398.1_gene;TEA015375.1_gene;TEA015388.1_gene;TEA015396.1_gene;TEA015382.1_gene;TEA015374.1_gene
MSTRG.56774.1	TEA019982.1_gene
MSTRG.116021.1	TEA028025.1_gene;TEA028045.1_gene
MSTRG.16929.1	TEA018194.1_gene;TEA018196.1_gene
MSTRG.122672.1	TEA004441.1_gene;TEA004443.1_gene;TEA004434.1_gene;TEA004437.1_gene;TEA004438.1_gene;TEA004442.1_gene
MSTRG.117104.2	TEA023211.1_gene;TEA023202.1_gene;TEA023209.1_gene;TEA023205.1_gene;TEA023207.1_gene
MSTRG.40990.2	TEA009667.1_gene;TEA009670.1_gene;TEA009674.1_gene;TEA009663.1_gene
MSTRG.81268.1	TEA014262.1_gene;TEA014255.1_gene;TEA014248.1_gene;TEA014243.1_gene;TEA014259.1_gene
MSTRG.34250.10	TEA013273.1_gene;TEA013277.1_gene;TEA013279.1_gene;TEA013280.1_gene
MSTRG.85172.2	TEA016085.1_gene;TEA016081.1_gene
MSTRG.33119.1	TEA016539.1_gene;TEA016559.1_gene;TEA016553.1_gene
MSTRG.76620.1	TEA031483.1_gene;TEA031482.1_gene
MSTRG.142694.2	TEA020332.1_gene;TEA020340.1_gene;TEA020342.1_gene;TEA020325.1_gene;TEA020326.1_gene
MSTRG.91573.1	TEA019656.1_gene;TEA019677.1_gene;TEA019663.1_gene
MSTRG.28300.3	TEA022430.1_gene;TEA022428.1_gene;TEA022431.1_gene;TEA022434.1_gene
MSTRG.78783.1	TEA011510.1_gene;TEA011505.1_gene;TEA011497.1_gene;TEA011500.1_gene
MSTRG.10180.1	TEA006188.1_gene;TEA006191.1_gene;TEA006205.1_gene;TEA006184.1_gene
MSTRG.42701.2	TEA010071.1_gene;TEA010106.1_gene;TEA010072.1_gene;TEA010096.1_gene
MSTRG.123322.1	TEA000795.1_gene
MSTRG.144191.1	TEA030529.1_gene;TEA030527.1_gene;TEA030522.1_gene;TEA030515.1_gene
MSTRG.119751.1	TEA001461.1_gene;TEA001456.1_gene;TEA001464.1_gene;TEA001483.1_gene
MSTRG.4775.1	TEA020102.1_gene;TEA020109.1_gene;TEA020110.1_gene
MSTRG.84391.1	TEA007496.1_gene;TEA007495.1_gene
MSTRG.66394.1	TEA013839.1_gene;TEA013835.1_gene;TEA013829.1_gene;TEA013825.1_gene;TEA013826.1_gene;TEA013843.1_gene;TEA013842.1_gene
MSTRG.72863.1	TEA015986.1_gene;TEA015990.1_gene;TEA015987.1_gene
MSTRG.106846.5	TEA020989.1_gene
MSTRG.54687.1	TEA025435.1_gene;TEA025434.1_gene;TEA025436.1_gene;TEA025430.1_gene;TEA025426.1_gene;TEA025428.1_gene
MSTRG.119166.1	TEA000232.1_gene;TEA000242.1_gene;TEA000236.1_gene;TEA000237.1_gene;TEA000233.1_gene
MSTRG.142213.1	TEA012819.1_gene;TEA012820.1_gene;TEA012847.1_gene
MSTRG.121493.2	TEA009260.1_gene;TEA009244.1_gene
MSTRG.79635.11	TEA016316.1_gene
MSTRG.12612.27	TEA001078.1_gene;TEA001084.1_gene;TEA001083.1_gene
MSTRG.67882.1	TEA028869.1_gene;TEA028871.1_gene
MSTRG.123.1	TEA014509.1_gene
MSTRG.67081.1	TEA004777.1_gene;TEA004779.1_gene;TEA004767.1_gene
MSTRG.1404.2	TEA027293.1_gene;TEA027289.1_gene
MSTRG.7953.1	TEA017833.1_gene;TEA017836.1_gene
MSTRG.129476.5	TEA019342.1_gene;TEA019339.1_gene
MSTRG.18803.1	TEA010429.1_gene;TEA010416.1_gene
MSTRG.116322.2	TEA004885.1_gene
MSTRG.43938.3	TEA020485.1_gene;TEA020481.1_gene
MSTRG.109337.1	TEA001412.1_gene
MSTRG.139696.1	TEA004645.1_gene
MSTRG.131835.6	TEA029357.1_gene
MSTRG.53051.1	TEA003496.1_gene;TEA003495.1_gene
MSTRG.8235.1	TEA015186.1_gene;TEA015200.1_gene;TEA015187.1_gene;TEA015202.1_gene;TEA015189.1_gene;TEA015184.1_gene
MSTRG.129080.1	TEA002582.1_gene
MSTRG.42000.1	TEA006238.1_gene;TEA006258.1_gene;TEA006240.1_gene
MSTRG.130429.1	TEA019867.1_gene;TEA019871.1_gene;TEA019823.1_gene
MSTRG.32667.1	TEA009617.1_gene;TEA009616.1_gene;TEA009609.1_gene;TEA009615.1_gene;TEA009613.1_gene
MSTRG.37440.1	TEA004512.1_gene;TEA004515.1_gene
MSTRG.120283.5	TEA011068.1_gene
MSTRG.73243.1	TEA031612.1_gene;TEA031593.1_gene;TEA031618.1_gene;TEA031609.1_gene;TEA031588.1_gene
MSTRG.69225.3	TEA020969.1_gene;TEA020965.1_gene
MSTRG.36621.1	TEA029140.1_gene;TEA029145.1_gene
MSTRG.121525.5	TEA009265.1_gene
MSTRG.30841.2	TEA018030.1_gene;TEA018037.1_gene;TEA018038.1_gene;TEA018033.1_gene;TEA018041.1_gene
MSTRG.49329.2	TEA030579.1_gene;TEA030575.1_gene;TEA030570.1_gene
MSTRG.89100.1	TEA012218.1_gene;TEA012195.1_gene;TEA012211.1_gene;TEA012212.1_gene;TEA012209.1_gene;TEA012204.1_gene
MSTRG.116639.2	TEA007163.1_gene
MSTRG.132833.1	TEA020536.1_gene;TEA020548.1_gene;TEA020545.1_gene;TEA020541.1_gene;TEA020546.1_gene;TEA020540.1_gene
MSTRG.21057.1	TEA024049.1_gene;TEA024032.1_gene;TEA024054.1_gene
MSTRG.107642.1	TEA015569.1_gene;TEA015577.1_gene
MSTRG.40525.1	TEA011008.1_gene;TEA011007.1_gene;TEA011003.1_gene;TEA011019.1_gene;TEA011012.1_gene
MSTRG.31222.1	TEA021852.1_gene
MSTRG.104928.1	TEA028156.1_gene;TEA028163.1_gene;TEA028172.1_gene;TEA028173.1_gene;TEA028153.1_gene;TEA028160.1_gene;TEA028162.1_gene
MSTRG.150269.1	TEA032996.1_gene;TEA032975.1_gene
MSTRG.55521.5	TEA008684.1_gene
MSTRG.121203.1	TEA012611.1_gene;TEA012604.1_gene;TEA012610.1_gene
MSTRG.106435.1	TEA007784.1_gene
MSTRG.53781.1	TEA016506.1_gene;TEA016501.1_gene;TEA016502.1_gene
MSTRG.86826.1	TEA007093.1_gene;TEA007092.1_gene;TEA007102.1_gene;TEA007081.1_gene
MSTRG.56995.7	TEA000168.1_gene;TEA000148.1_gene;TEA000166.1_gene;TEA000170.1_gene
MSTRG.1605.2	TEA021910.1_gene;TEA021912.1_gene;TEA021914.1_gene;TEA021921.1_gene;TEA021908.1_gene;TEA021905.1_gene
MSTRG.151316.8	TEA031521.1_gene;TEA031520.1_gene;TEA031513.1_gene
MSTRG.130001.2	TEA001918.1_gene;TEA001933.1_gene;TEA001944.1_gene
MSTRG.35917.1	TEA009176.1_gene;TEA009171.1_gene;TEA009189.1_gene
MSTRG.104489.1	TEA016263.1_gene;TEA016275.1_gene;TEA016285.1_gene;TEA016289.1_gene
MSTRG.31156.1	TEA027559.1_gene
MSTRG.76073.1	TEA008321.1_gene;TEA008315.1_gene;TEA008322.1_gene;TEA008311.1_gene;TEA008310.1_gene;TEA008314.1_gene
MSTRG.42238.3	TEA032458.1_gene;TEA032451.1_gene;TEA032474.1_gene;TEA032471.1_gene
MSTRG.154130.1	TEA028375.1_gene
MSTRG.49353.5	TEA030566.1_gene;TEA030572.1_gene;TEA030578.1_gene;TEA030562.1_gene
MSTRG.36333.1	TEA019315.1_gene;TEA019323.1_gene;TEA019316.1_gene;TEA019318.1_gene;TEA019326.1_gene
MSTRG.150279.1	TEA032977.1_gene;TEA032979.1_gene;TEA032998.1_gene
MSTRG.2057.1	TEA016720.1_gene;TEA016709.1_gene;TEA016717.1_gene
MSTRG.6113.1	TEA021953.1_gene;TEA021956.1_gene;TEA021955.1_gene;TEA021957.1_gene;TEA021950.1_gene;TEA021967.1_gene
MSTRG.47256.1	TEA015616.1_gene;TEA015617.1_gene;TEA015606.1_gene
MSTRG.96764.1	TEA009138.1_gene
MSTRG.18785.2	TEA010412.1_gene;TEA010430.1_gene;TEA010422.1_gene
MSTRG.118859.1	TEA021936.1_gene;TEA021929.1_gene;TEA021930.1_gene;TEA021942.1_gene;TEA021941.1_gene
MSTRG.74370.2	TEA029401.1_gene
MSTRG.136364.45	TEA020561.1_gene;TEA020563.1_gene;TEA020562.1_gene;TEA020565.1_gene
MSTRG.64566.1	TEA023468.1_gene
MSTRG.33747.1	TEA012737.1_gene;TEA012747.1_gene
MSTRG.11190.2	TEA000759.1_gene
MSTRG.137366.1	TEA014618.1_gene;TEA014645.1_gene;TEA014625.1_gene;TEA014606.1_gene;TEA014636.1_gene;TEA014635.1_gene
MSTRG.135733.1	TEA007532.1_gene
MSTRG.140847.2	TEA017446.1_gene
MSTRG.145878.1	TEA033043.1_gene;TEA033030.1_gene;TEA033037.1_gene
MSTRG.155305.2	TEA024304.1_gene;TEA024310.1_gene;TEA024296.1_gene;TEA024295.1_gene;TEA024302.1_gene
MSTRG.26878.4	TEA010928.1_gene
MSTRG.67624.1	TEA033661.1_gene
MSTRG.125743.5	TEA001206.1_gene;TEA001214.1_gene;TEA001210.1_gene
MSTRG.28513.1	TEA012094.1_gene;TEA012099.1_gene
MSTRG.118904.1	TEA021934.1_gene
MSTRG.36617.5	TEA029145.1_gene;TEA029140.1_gene
MSTRG.57382.1	TEA018960.1_gene;TEA018961.1_gene;TEA018966.1_gene;TEA018964.1_gene;TEA018958.1_gene
MSTRG.98581.1	TEA014480.1_gene;TEA014440.1_gene;TEA014413.1_gene;TEA014431.1_gene;TEA014410.1_gene;TEA014447.1_gene;TEA014417.1_gene;TEA014406.1_gene
MSTRG.58891.1	TEA023869.1_gene
MSTRG.17263.5	TEA004240.1_gene
MSTRG.149936.1	TEA007823.1_gene;TEA007832.1_gene
MSTRG.124684.4	TEA019237.1_gene;TEA019241.1_gene
MSTRG.132618.3	TEA005467.1_gene;TEA005484.1_gene;TEA005476.1_gene
MSTRG.43431.1	TEA026443.1_gene
MSTRG.58692.1	TEA029424.1_gene
MSTRG.8160.2	TEA026148.1_gene
MSTRG.131865.1	TEA033185.1_gene;TEA033188.1_gene;TEA033192.1_gene;TEA033172.1_gene;TEA033184.1_gene
MSTRG.27488.1	TEA032722.1_gene
MSTRG.153173.1	TEA018293.1_gene
MSTRG.117820.1	TEA019954.1_gene;TEA019951.1_gene;TEA019953.1_gene
MSTRG.25312.2	TEA032376.1_gene;TEA032378.1_gene
MSTRG.18663.1	TEA030895.1_gene;TEA030900.1_gene
MSTRG.78112.1	TEA004721.1_gene;TEA004712.1_gene
MSTRG.96187.1	TEA018629.1_gene;TEA018627.1_gene;TEA018625.1_gene
MSTRG.1272.1	TEA013001.1_gene;TEA013010.1_gene;TEA012993.1_gene
MSTRG.72792.1	TEA015469.1_gene;TEA015481.1_gene;TEA015483.1_gene
MSTRG.23153.1	TEA008367.1_gene
MSTRG.57884.1	TEA031834.1_gene
MSTRG.149394.1	TEA012082.1_gene
MSTRG.124696.1	TEA002695.1_gene;TEA002689.1_gene;TEA002675.1_gene;TEA002691.1_gene;TEA002676.1_gene;TEA002679.1_gene;TEA002678.1_gene
MSTRG.65740.1	TEA013444.1_gene
MSTRG.28440.1	TEA021537.1_gene;TEA021527.1_gene;TEA021541.1_gene;TEA021528.1_gene;TEA021533.1_gene
MSTRG.98381.1	TEA014439.1_gene;TEA014421.1_gene;TEA014486.1_gene;TEA014490.1_gene;TEA014456.1_gene
MSTRG.135914.1	TEA017552.1_gene;TEA017548.1_gene
MSTRG.40990.4	TEA009667.1_gene;TEA009670.1_gene;TEA009674.1_gene;TEA009663.1_gene
MSTRG.130994.1	TEA023104.1_gene
MSTRG.105149.6	TEA009910.1_gene
MSTRG.41843.1	TEA016601.1_gene
MSTRG.80127.2	TEA019925.1_gene;TEA019914.1_gene;TEA019917.1_gene;TEA019930.1_gene
MSTRG.145316.4	TEA023221.1_gene;TEA023219.1_gene
MSTRG.93778.24	TEA021814.1_gene
MSTRG.121639.1	TEA025740.1_gene
MSTRG.28624.1	TEA032388.1_gene;TEA032393.1_gene;TEA032390.1_gene;TEA032395.1_gene
MSTRG.21067.1	TEA024032.1_gene;TEA024054.1_gene;TEA024049.1_gene
MSTRG.124363.1	TEA019517.1_gene;TEA019532.1_gene;TEA019534.1_gene;TEA019523.1_gene;TEA019555.1_gene
MSTRG.100417.3	TEA033260.1_gene;TEA033261.1_gene;TEA033231.1_gene
MSTRG.154732.1	TEA022865.1_gene;TEA022847.1_gene;TEA022832.1_gene
MSTRG.74755.2	TEA022116.1_gene
MSTRG.153945.1	TEA025628.1_gene;TEA025626.1_gene;TEA025624.1_gene;TEA025629.1_gene;TEA025621.1_gene;TEA025623.1_gene
MSTRG.64821.1	TEA016988.1_gene;TEA016986.1_gene
MSTRG.3160.1	TEA000799.1_gene;TEA000804.1_gene;TEA000800.1_gene;TEA000801.1_gene;TEA000803.1_gene;TEA000798.1_gene;TEA000806.1_gene;TEA000805.1_gene;TEA000807.1_gene
MSTRG.136364.33	TEA020562.1_gene;TEA020565.1_gene;TEA020563.1_gene;TEA020561.1_gene
MSTRG.136185.1	TEA004836.1_gene;TEA004839.1_gene;TEA004838.1_gene;TEA004837.1_gene
MSTRG.101056.1	TEA024574.1_gene;TEA024573.1_gene
MSTRG.31188.2	TEA027730.1_gene
MSTRG.137571.1	TEA023314.1_gene;TEA023324.1_gene;TEA023309.1_gene;TEA023329.1_gene
MSTRG.24919.7	TEA026537.1_gene;TEA026538.1_gene
MSTRG.117501.1	TEA022614.1_gene;TEA022613.1_gene;TEA022610.1_gene
MSTRG.39212.1	TEA019348.1_gene;TEA019346.1_gene
MSTRG.37957.8	TEA005150.1_gene;TEA005137.1_gene;TEA005133.1_gene;TEA005126.1_gene
MSTRG.106750.1	TEA026139.1_gene
MSTRG.101072.2	TEA024591.1_gene;TEA024572.1_gene;TEA024588.1_gene
MSTRG.8262.1	TEA015192.1_gene;TEA015195.1_gene;TEA015201.1_gene;TEA015185.1_gene
MSTRG.58970.1	TEA023861.1_gene
MSTRG.49501.1	TEA017523.1_gene;TEA017518.1_gene;TEA017528.1_gene;TEA017504.1_gene;TEA017538.1_gene;TEA017493.1_gene
MSTRG.145316.47	TEA023221.1_gene
MSTRG.5803.1	TEA005486.1_gene;TEA005488.1_gene
MSTRG.125111.2	TEA031027.1_gene;TEA031032.1_gene
MSTRG.17094.1	TEA004226.1_gene;TEA004229.1_gene;TEA004278.1_gene;TEA004280.1_gene
MSTRG.116033.1	TEA028019.1_gene;TEA028041.1_gene;TEA028033.1_gene;TEA028042.1_gene
MSTRG.130739.6	TEA029849.1_gene;TEA029855.1_gene
MSTRG.5921.2	TEA011519.1_gene;TEA011513.1_gene;TEA011518.1_gene;TEA011517.1_gene;TEA011514.1_gene
MSTRG.22873.1	TEA021437.1_gene
MSTRG.144132.3	TEA012038.1_gene
MSTRG.52404.1	TEA022697.1_gene
MSTRG.9957.1	TEA025117.1_gene;TEA025107.1_gene;TEA025110.1_gene;TEA025115.1_gene
MSTRG.70350.1	TEA011928.1_gene;TEA011943.1_gene
MSTRG.13005.1	TEA000337.1_gene;TEA000323.1_gene
MSTRG.117757.1	TEA017007.1_gene;TEA017006.1_gene
MSTRG.49681.3	TEA005326.1_gene;TEA005303.1_gene
MSTRG.44628.1	TEA033348.1_gene;TEA033340.1_gene
MSTRG.127684.1	TEA008541.1_gene
MSTRG.18431.2	TEA028293.1_gene;TEA028281.1_gene;TEA028280.1_gene
MSTRG.113559.9	TEA013650.1_gene;TEA013635.1_gene;TEA013624.1_gene
MSTRG.95811.4	TEA000911.1_gene;TEA000932.1_gene
MSTRG.94774.1	TEA031432.1_gene;TEA031435.1_gene;TEA031428.1_gene;TEA031433.1_gene;TEA031429.1_gene
MSTRG.19335.1	TEA017283.1_gene;TEA017282.1_gene
MSTRG.5535.3	TEA022311.1_gene;TEA022309.1_gene;TEA022308.1_gene
MSTRG.50233.1	TEA005562.1_gene
MSTRG.22961.2	TEA015594.1_gene;TEA015590.1_gene;TEA015588.1_gene
MSTRG.108852.1	TEA003938.1_gene;TEA003937.1_gene;TEA003934.1_gene
MSTRG.15751.1	TEA022601.1_gene;TEA022598.1_gene;TEA022599.1_gene;TEA022597.1_gene;TEA022602.1_gene;TEA022595.1_gene;TEA022603.1_gene
MSTRG.145022.5	TEA015086.1_gene;TEA015088.1_gene;TEA015092.1_gene
MSTRG.29025.1	TEA033503.1_gene
MSTRG.47291.1	TEA015626.1_gene
MSTRG.66109.2	TEA014537.1_gene
MSTRG.34150.1	TEA007586.1_gene;TEA007604.1_gene;TEA007595.1_gene
MSTRG.89822.1	TEA018567.1_gene;TEA018554.1_gene
MSTRG.91205.2	TEA014844.1_gene;TEA014837.1_gene;TEA014832.1_gene;TEA014838.1_gene;TEA014840.1_gene;TEA014834.1_gene;TEA014839.1_gene
MSTRG.44873.1	TEA013413.1_gene
MSTRG.24184.1	TEA004455.1_gene;TEA004449.1_gene
MSTRG.75650.1	TEA000379.1_gene;TEA000378.1_gene;TEA000376.1_gene
MSTRG.39788.1	TEA011444.1_gene;TEA011438.1_gene;TEA011441.1_gene;TEA011454.1_gene;TEA011450.1_gene
MSTRG.66269.1	TEA008017.1_gene
MSTRG.23694.1	TEA004157.1_gene;TEA004153.1_gene;TEA004155.1_gene
MSTRG.80188.1	TEA006692.1_gene;TEA006689.1_gene;TEA006693.1_gene;TEA006691.1_gene
MSTRG.53679.2	TEA027859.1_gene;TEA027833.1_gene
MSTRG.80200.2	TEA006696.1_gene
MSTRG.56389.1	TEA000890.1_gene;TEA000881.1_gene;TEA000892.1_gene
MSTRG.130461.1	TEA019844.1_gene;TEA019846.1_gene
MSTRG.125411.2	TEA001858.1_gene;TEA001850.1_gene
MSTRG.67880.1	TEA028869.1_gene;TEA028871.1_gene
MSTRG.49902.2	TEA026721.1_gene;TEA026726.1_gene;TEA026719.1_gene;TEA026729.1_gene
MSTRG.68609.1	TEA024342.1_gene;TEA024344.1_gene;TEA024341.1_gene;TEA024343.1_gene
MSTRG.21997.1	TEA026329.1_gene
MSTRG.94786.1	TEA031436.1_gene;TEA031423.1_gene
MSTRG.141711.1	TEA011321.1_gene;TEA011323.1_gene
MSTRG.96569.5	TEA022810.1_gene;TEA022804.1_gene;TEA022796.1_gene;TEA022802.1_gene
MSTRG.2583.1	TEA029450.1_gene;TEA029447.1_gene
MSTRG.53170.2	TEA010482.1_gene;TEA010498.1_gene
MSTRG.95543.1	TEA004341.1_gene;TEA004346.1_gene;TEA004349.1_gene
MSTRG.84066.4	TEA013260.1_gene;TEA013253.1_gene
MSTRG.132554.1	TEA005477.1_gene
MSTRG.147642.6	TEA018804.1_gene;TEA018790.1_gene;TEA018776.1_gene;TEA018811.1_gene
MSTRG.153648.2	TEA033653.1_gene;TEA033655.1_gene;TEA033646.1_gene;TEA033644.1_gene
MSTRG.114783.1	TEA002807.1_gene;TEA002816.1_gene;TEA002840.1_gene;TEA002820.1_gene;TEA002819.1_gene;TEA002803.1_gene;TEA002818.1_gene
MSTRG.105935.1	TEA004118.1_gene;TEA004120.1_gene;TEA004132.1_gene;TEA004121.1_gene
MSTRG.89206.1	TEA003542.1_gene;TEA003550.1_gene
MSTRG.27597.1	TEA013927.1_gene;TEA013978.1_gene;TEA013986.1_gene;TEA013939.1_gene;TEA013943.1_gene;TEA013969.1_gene
MSTRG.41518.1	TEA016108.1_gene;TEA016109.1_gene
MSTRG.136454.6	TEA008607.1_gene;TEA008603.1_gene
MSTRG.20744.1	TEA009633.1_gene;TEA009645.1_gene
MSTRG.100372.1	TEA001902.1_gene;TEA001895.1_gene;TEA001903.1_gene;TEA001893.1_gene
MSTRG.92467.1	TEA022385.1_gene;TEA022383.1_gene;TEA022386.1_gene;TEA022382.1_gene;TEA022388.1_gene
MSTRG.52917.1	TEA009710.1_gene;TEA009713.1_gene;TEA009711.1_gene
MSTRG.108851.1	TEA003937.1_gene;TEA003938.1_gene;TEA003934.1_gene
MSTRG.59242.1	TEA031979.1_gene;TEA031983.1_gene
MSTRG.132899.2	TEA000497.1_gene;TEA000494.1_gene;TEA000481.1_gene;TEA000491.1_gene
MSTRG.83212.6	TEA016021.1_gene
MSTRG.128377.3	TEA011873.1_gene;TEA011861.1_gene
MSTRG.45444.1	TEA006974.1_gene
MSTRG.75769.1	TEA028128.1_gene;TEA028134.1_gene;TEA028131.1_gene;TEA028127.1_gene;TEA028129.1_gene;TEA028133.1_gene;TEA028135.1_gene
MSTRG.151316.13	TEA031521.1_gene;TEA031520.1_gene;TEA031513.1_gene
MSTRG.145018.1	TEA015086.1_gene;TEA015089.1_gene;TEA015097.1_gene
MSTRG.121546.3	TEA009234.1_gene;TEA009242.1_gene;TEA009248.1_gene;TEA009252.1_gene;TEA009243.1_gene
MSTRG.154621.1	TEA022840.1_gene;TEA022864.1_gene;TEA022854.1_gene;TEA022841.1_gene;TEA022844.1_gene;TEA022842.1_gene;TEA022866.1_gene
MSTRG.20262.1	TEA029172.1_gene;TEA029171.1_gene;TEA029173.1_gene;TEA029161.1_gene
MSTRG.63914.1	TEA010714.1_gene;TEA010716.1_gene
MSTRG.106727.3	TEA026137.1_gene;TEA026141.1_gene
MSTRG.32561.1	TEA000993.1_gene
MSTRG.98134.4	TEA015247.1_gene;TEA015278.1_gene;TEA015260.1_gene;TEA015244.1_gene;TEA015236.1_gene;TEA015281.1_gene;TEA015254.1_gene
MSTRG.22995.1	TEA015592.1_gene;TEA015587.1_gene;TEA015593.1_gene;TEA015586.1_gene;TEA015602.1_gene;TEA015601.1_gene;TEA015595.1_gene
MSTRG.58819.1	TEA016353.1_gene
MSTRG.88696.3	TEA000785.1_gene;TEA000787.1_gene;TEA000778.1_gene
MSTRG.135288.2	TEA010677.1_gene;TEA010663.1_gene;TEA010664.1_gene;TEA010667.1_gene
MSTRG.15331.1	TEA007175.1_gene
MSTRG.33028.4	TEA016572.1_gene;TEA016518.1_gene;TEA016548.1_gene;TEA016531.1_gene;TEA016544.1_gene;TEA016524.1_gene;TEA016547.1_gene
MSTRG.5049.1	TEA018746.1_gene;TEA018742.1_gene
MSTRG.111623.1	TEA008837.1_gene;TEA008825.1_gene;TEA008824.1_gene;TEA008817.1_gene;TEA008840.1_gene
MSTRG.74256.1	TEA009803.1_gene;TEA009797.1_gene;TEA009777.1_gene;TEA009771.1_gene;TEA009819.1_gene
MSTRG.35065.3	TEA021230.1_gene;TEA021234.1_gene
MSTRG.122542.1	TEA022095.1_gene;TEA022091.1_gene;TEA022088.1_gene;TEA022083.1_gene
MSTRG.33832.1	TEA012725.1_gene;TEA012727.1_gene;TEA012738.1_gene;TEA012751.1_gene;TEA012740.1_gene
MSTRG.107806.4	TEA029409.1_gene;TEA029407.1_gene;TEA029410.1_gene;TEA029405.1_gene
MSTRG.85121.1	TEA016083.1_gene;TEA016076.1_gene
MSTRG.141934.5	TEA017276.1_gene;TEA017279.1_gene
MSTRG.138613.1	TEA022920.1_gene;TEA022892.1_gene;TEA022921.1_gene;TEA022909.1_gene;TEA022908.1_gene;TEA022883.1_gene;TEA022918.1_gene;TEA022900.1_gene;TEA022919.1_gene
MSTRG.43722.1	TEA008803.1_gene
MSTRG.62546.14	TEA012130.1_gene;TEA012145.1_gene;TEA012148.1_gene;TEA012139.1_gene;TEA012141.1_gene;TEA012149.1_gene
MSTRG.64456.2	TEA002156.1_gene;TEA002155.1_gene
MSTRG.112654.1	TEA024968.1_gene;TEA024970.1_gene;TEA024961.1_gene;TEA024986.1_gene;TEA024960.1_gene;TEA024990.1_gene
MSTRG.127250.1	TEA018372.1_gene;TEA018374.1_gene;TEA018365.1_gene;TEA018375.1_gene;TEA018363.1_gene;TEA018371.1_gene;TEA018364.1_gene
MSTRG.37957.6	TEA005133.1_gene;TEA005126.1_gene;TEA005137.1_gene;TEA005150.1_gene
MSTRG.72563.1	TEA004013.1_gene;TEA003999.1_gene;TEA003963.1_gene;TEA004016.1_gene
MSTRG.63560.1	TEA007967.1_gene;TEA007963.1_gene;TEA007968.1_gene;TEA007966.1_gene
MSTRG.141136.1	TEA028179.1_gene;TEA028199.1_gene;TEA028200.1_gene;TEA028186.1_gene;TEA028187.1_gene
MSTRG.41158.1	TEA023038.1_gene;TEA023031.1_gene
MSTRG.109268.2	TEA003036.1_gene
MSTRG.62817.1	TEA003738.1_gene;TEA003733.1_gene;TEA003735.1_gene
MSTRG.75279.8	TEA016400.1_gene;TEA016401.1_gene;TEA016387.1_gene
MSTRG.124042.1	TEA013891.1_gene;TEA013906.1_gene;TEA013884.1_gene
MSTRG.86386.1	TEA015515.1_gene;TEA015519.1_gene;TEA015512.1_gene;TEA015514.1_gene;TEA015520.1_gene
MSTRG.135134.2	TEA017704.1_gene;TEA017714.1_gene;TEA017705.1_gene
MSTRG.23296.1	TEA030724.1_gene
MSTRG.69471.1	TEA026548.1_gene;TEA026574.1_gene
MSTRG.143475.1	TEA019707.1_gene;TEA019746.1_gene;TEA019748.1_gene;TEA019717.1_gene
MSTRG.53734.1	TEA027866.1_gene;TEA027849.1_gene;TEA027854.1_gene;TEA027851.1_gene;TEA027841.1_gene
MSTRG.79099.2	TEA006459.1_gene;TEA006450.1_gene;TEA006455.1_gene;TEA006451.1_gene;TEA006465.1_gene;TEA006446.1_gene;TEA006460.1_gene;TEA006445.1_gene
MSTRG.90259.1	TEA002145.1_gene;TEA002104.1_gene;TEA002105.1_gene
MSTRG.131127.1	TEA032410.1_gene
MSTRG.89781.1	TEA018562.1_gene;TEA018563.1_gene
MSTRG.69526.1	TEA018424.1_gene;TEA018429.1_gene;TEA018445.1_gene;TEA018437.1_gene;TEA018441.1_gene
MSTRG.61336.1	TEA022280.1_gene;TEA022281.1_gene
MSTRG.115202.9	TEA013860.1_gene
MSTRG.59926.1	TEA029890.1_gene;TEA029929.1_gene;TEA029934.1_gene
MSTRG.136751.1	TEA032806.1_gene;TEA032803.1_gene;TEA032794.1_gene
MSTRG.31746.7	TEA018451.1_gene;TEA018456.1_gene;TEA018459.1_gene
MSTRG.112039.1	TEA014932.1_gene;TEA014922.1_gene
MSTRG.60990.2	TEA025657.1_gene;TEA025638.1_gene
MSTRG.36246.1	TEA014764.1_gene
MSTRG.53267.2	TEA019295.1_gene;TEA019277.1_gene
MSTRG.53427.1	TEA007869.1_gene;TEA007870.1_gene;TEA007885.1_gene
MSTRG.92661.1	TEA017910.1_gene;TEA017912.1_gene
MSTRG.98453.1	TEA014430.1_gene;TEA014455.1_gene;TEA014482.1_gene;TEA014442.1_gene
MSTRG.130257.3	TEA005648.1_gene;TEA005636.1_gene
MSTRG.23426.1	TEA007987.1_gene;TEA007995.1_gene;TEA007993.1_gene;TEA007984.1_gene
MSTRG.100644.1	TEA022460.1_gene;TEA022454.1_gene;TEA022458.1_gene;TEA022456.1_gene
MSTRG.122694.1	TEA004432.1_gene;TEA004440.1_gene;TEA004445.1_gene;TEA004433.1_gene
MSTRG.147530.2	TEA026851.1_gene
MSTRG.119090.1	TEA016924.1_gene;TEA016918.1_gene;TEA016923.1_gene;TEA016919.1_gene
MSTRG.142252.1	TEA014366.1_gene;TEA014356.1_gene;TEA014355.1_gene;TEA014364.1_gene
MSTRG.121557.1	TEA009248.1_gene;TEA009252.1_gene;TEA009242.1_gene;TEA009234.1_gene;TEA009243.1_gene
MSTRG.97630.2	TEA017901.1_gene;TEA017898.1_gene
MSTRG.44160.3	TEA012916.1_gene;TEA012918.1_gene;TEA012914.1_gene;TEA012926.1_gene
MSTRG.81097.1	TEA012575.1_gene
MSTRG.129628.1	TEA031874.1_gene
MSTRG.9577.1	TEA027976.1_gene
MSTRG.10996.1	TEA023239.1_gene;TEA023247.1_gene;TEA023237.1_gene;TEA023236.1_gene
MSTRG.80477.1	TEA022462.1_gene
MSTRG.154367.12	TEA013089.1_gene;TEA013090.1_gene;TEA013094.1_gene;TEA013096.1_gene;TEA013092.1_gene;TEA013093.1_gene
MSTRG.142610.1	TEA020333.1_gene;TEA020358.1_gene;TEA020344.1_gene
MSTRG.117275.1	TEA011530.1_gene;TEA011529.1_gene
MSTRG.136335.2	TEA003328.1_gene
MSTRG.55775.2	TEA013472.1_gene;TEA013465.1_gene;TEA013482.1_gene
MSTRG.88836.3	TEA025084.1_gene
MSTRG.122593.1	TEA002340.1_gene;TEA002334.1_gene;TEA002343.1_gene;TEA002338.1_gene;TEA002342.1_gene;TEA002337.1_gene
MSTRG.47316.1	TEA005782.1_gene;TEA005776.1_gene;TEA005789.1_gene;TEA005785.1_gene;TEA005775.1_gene;TEA005787.1_gene;TEA005788.1_gene
MSTRG.63393.17	TEA012804.1_gene;TEA012811.1_gene;TEA012803.1_gene;TEA012800.1_gene;TEA012805.1_gene
MSTRG.123346.2	TEA010578.1_gene;TEA010574.1_gene;TEA010577.1_gene;TEA010576.1_gene
MSTRG.30530.2	TEA019122.1_gene;TEA019126.1_gene;TEA019163.1_gene;TEA019154.1_gene
MSTRG.43609.1	TEA032555.1_gene;TEA032549.1_gene
MSTRG.3404.2	TEA007119.1_gene;TEA007131.1_gene;TEA007134.1_gene;TEA007138.1_gene;TEA007118.1_gene;TEA007125.1_gene;TEA007116.1_gene;TEA007155.1_gene
MSTRG.43971.5	TEA024111.1_gene;TEA024122.1_gene;TEA024134.1_gene
MSTRG.138181.6	TEA028637.1_gene;TEA028633.1_gene;TEA028631.1_gene
MSTRG.137839.4	TEA025094.1_gene
MSTRG.154752.1	TEA022847.1_gene;TEA022820.1_gene;TEA022824.1_gene
MSTRG.122336.1	TEA024743.1_gene;TEA024745.1_gene;TEA024748.1_gene
MSTRG.128754.5	TEA007794.1_gene;TEA007786.1_gene;TEA007792.1_gene;TEA007790.1_gene;TEA007788.1_gene;TEA007801.1_gene;TEA007803.1_gene
MSTRG.16717.1	TEA026157.1_gene;TEA026162.1_gene;TEA026158.1_gene;TEA026156.1_gene
MSTRG.59654.2	TEA032527.1_gene;TEA032524.1_gene;TEA032525.1_gene;TEA032537.1_gene
MSTRG.145671.1	TEA028362.1_gene;TEA028321.1_gene
MSTRG.96511.1	TEA030796.1_gene;TEA030781.1_gene;TEA030784.1_gene
MSTRG.54378.1	TEA015926.1_gene;TEA015900.1_gene;TEA015903.1_gene;TEA015908.1_gene;TEA015938.1_gene;TEA015911.1_gene;TEA015924.1_gene
MSTRG.24966.1	TEA026540.1_gene
MSTRG.145320.6	TEA023221.1_gene;TEA023219.1_gene
MSTRG.35434.2	TEA015123.1_gene;TEA015115.1_gene;TEA015105.1_gene
MSTRG.3435.1	TEA007133.1_gene;TEA007130.1_gene;TEA007147.1_gene;TEA007129.1_gene;TEA007136.1_gene
MSTRG.149277.1	TEA027826.1_gene;TEA027815.1_gene;TEA027806.1_gene;TEA027821.1_gene;TEA027804.1_gene
MSTRG.145320.21	TEA023221.1_gene
MSTRG.116830.22	TEA011268.1_gene;TEA011271.1_gene
MSTRG.56004.1	TEA002494.1_gene;TEA002496.1_gene;TEA002493.1_gene
MSTRG.18399.4	TEA028289.1_gene
MSTRG.23883.1	TEA023350.1_gene;TEA023349.1_gene;TEA023351.1_gene
MSTRG.72421.1	TEA011790.1_gene;TEA011786.1_gene;TEA011777.1_gene;TEA011782.1_gene;TEA011803.1_gene
MSTRG.45267.1	TEA011033.1_gene;TEA011040.1_gene;TEA011045.1_gene
MSTRG.124176.1	TEA020250.1_gene;TEA020235.1_gene;TEA020241.1_gene;TEA020255.1_gene;TEA020256.1_gene
MSTRG.77579.9	TEA013132.1_gene;TEA013129.1_gene;TEA013135.1_gene;TEA013133.1_gene;TEA013126.1_gene;TEA013127.1_gene;TEA013136.1_gene
MSTRG.93761.1	TEA021797.1_gene
MSTRG.73756.1	TEA032342.1_gene;TEA032336.1_gene;TEA032337.1_gene;TEA032350.1_gene;TEA032351.1_gene;TEA032341.1_gene
MSTRG.1763.1	TEA009884.1_gene;TEA009889.1_gene;TEA009888.1_gene;TEA009886.1_gene
MSTRG.87289.1	TEA005407.1_gene;TEA005406.1_gene;TEA005409.1_gene
MSTRG.71067.1	TEA027600.1_gene
MSTRG.136507.1	TEA012592.1_gene;TEA012589.1_gene
MSTRG.21037.1	TEA010562.1_gene;TEA010568.1_gene;TEA010567.1_gene
MSTRG.116550.1	TEA013066.1_gene;TEA013062.1_gene;TEA013073.1_gene;TEA013065.1_gene;TEA013064.1_gene;TEA013078.1_gene;TEA013072.1_gene
MSTRG.7014.1	TEA004062.1_gene;TEA004067.1_gene;TEA004064.1_gene
MSTRG.96689.1	TEA029110.1_gene;TEA029100.1_gene;TEA029097.1_gene;TEA029095.1_gene
MSTRG.21676.2	TEA020792.1_gene;TEA020787.1_gene
MSTRG.31128.1	TEA027571.1_gene;TEA027566.1_gene;TEA027572.1_gene
MSTRG.92804.1	TEA006717.1_gene;TEA006720.1_gene;TEA006725.1_gene;TEA006722.1_gene;TEA006719.1_gene;TEA006723.1_gene
MSTRG.62773.7	TEA028061.1_gene;TEA028057.1_gene
MSTRG.62597.1	TEA012134.1_gene;TEA012131.1_gene
MSTRG.61530.1	TEA001140.1_gene;TEA001144.1_gene
MSTRG.10220.4	TEA006200.1_gene
MSTRG.74912.1	TEA007231.1_gene;TEA007238.1_gene
MSTRG.46091.1	TEA033382.1_gene
MSTRG.150132.1	TEA009985.1_gene;TEA009976.1_gene;TEA009988.1_gene;TEA009989.1_gene
MSTRG.70881.1	TEA033356.1_gene;TEA033353.1_gene
MSTRG.117006.1	TEA026776.1_gene;TEA026782.1_gene;TEA026771.1_gene;TEA026770.1_gene
MSTRG.93273.4	TEA020315.1_gene;TEA020309.1_gene;TEA020312.1_gene;TEA020313.1_gene;TEA020311.1_gene
MSTRG.110156.1	TEA021290.1_gene;TEA021280.1_gene;TEA021284.1_gene;TEA021286.1_gene;TEA021293.1_gene;TEA021291.1_gene;TEA021282.1_gene;TEA021287.1_gene;TEA021283.1_gene;TEA021289.1_gene
MSTRG.7343.2	TEA025298.1_gene;TEA025279.1_gene;TEA025296.1_gene;TEA025288.1_gene;TEA025289.1_gene
MSTRG.154296.2	TEA008080.1_gene
MSTRG.19275.3	TEA033092.1_gene;TEA033087.1_gene;TEA033085.1_gene;TEA033084.1_gene;TEA033086.1_gene
MSTRG.18663.3	TEA030895.1_gene;TEA030900.1_gene
MSTRG.61836.1	TEA001637.1_gene;TEA001601.1_gene;TEA001676.1_gene;TEA001634.1_gene
MSTRG.40652.1	TEA026715.1_gene;TEA026709.1_gene;TEA026710.1_gene;TEA026706.1_gene
MSTRG.117354.1	TEA020825.1_gene;TEA020820.1_gene;TEA020828.1_gene
MSTRG.124670.1	TEA019241.1_gene;TEA019238.1_gene;TEA019236.1_gene
MSTRG.52404.8	TEA022697.1_gene
MSTRG.108329.1	TEA012619.1_gene;TEA012626.1_gene;TEA012628.1_gene;TEA012632.1_gene
MSTRG.87696.5	TEA007412.1_gene;TEA007416.1_gene
MSTRG.38571.1	TEA012707.1_gene;TEA012686.1_gene
MSTRG.87731.1	TEA007405.1_gene
MSTRG.4096.1	TEA021387.1_gene;TEA021397.1_gene;TEA021394.1_gene
MSTRG.53170.1	TEA010498.1_gene;TEA010482.1_gene
MSTRG.73362.1	TEA031592.1_gene
MSTRG.66256.1	TEA008012.1_gene;TEA008021.1_gene;TEA008022.1_gene;TEA008015.1_gene
MSTRG.91454.1	TEA010760.1_gene;TEA010759.1_gene
MSTRG.153648.1	TEA033644.1_gene;TEA033655.1_gene;TEA033646.1_gene;TEA033653.1_gene
MSTRG.2691.1	TEA032302.1_gene;TEA032306.1_gene;TEA032303.1_gene;TEA032305.1_gene;TEA032309.1_gene;TEA032308.1_gene;TEA032304.1_gene;TEA032310.1_gene
MSTRG.52457.1	TEA027078.1_gene;TEA027051.1_gene
MSTRG.50080.1	TEA015844.1_gene;TEA015829.1_gene;TEA015838.1_gene;TEA015840.1_gene;TEA015841.1_gene;TEA015835.1_gene
MSTRG.100741.2	TEA019809.1_gene
MSTRG.7347.2	TEA025298.1_gene;TEA025279.1_gene;TEA025288.1_gene;TEA025291.1_gene;TEA025289.1_gene
MSTRG.44160.5	TEA012926.1_gene;TEA012914.1_gene;TEA012916.1_gene;TEA012918.1_gene
MSTRG.122053.1	TEA004409.1_gene;TEA004402.1_gene
MSTRG.119661.1	TEA001447.1_gene;TEA001514.1_gene;TEA001484.1_gene;TEA001466.1_gene;TEA001457.1_gene;TEA001498.1_gene;TEA001516.1_gene;TEA001508.1_gene
MSTRG.24669.1	TEA010571.1_gene
MSTRG.152797.1	TEA018477.1_gene
MSTRG.114125.1	TEA022547.1_gene;TEA022571.1_gene;TEA022590.1_gene;TEA022561.1_gene
MSTRG.23211.1	TEA030741.1_gene;TEA030714.1_gene
MSTRG.126081.3	TEA004482.1_gene
MSTRG.99908.1	TEA011354.1_gene;TEA011329.1_gene
MSTRG.57180.1	TEA010303.1_gene;TEA010308.1_gene;TEA010311.1_gene
MSTRG.126324.1	TEA001756.1_gene
MSTRG.70665.1	TEA022232.1_gene
MSTRG.141683.4	TEA031321.1_gene
MSTRG.123679.2	TEA003684.1_gene;TEA003681.1_gene;TEA003703.1_gene;TEA003702.1_gene;TEA003700.1_gene
MSTRG.104921.1	TEA028162.1_gene;TEA028153.1_gene;TEA028172.1_gene;TEA028155.1_gene
MSTRG.129963.8	TEA001921.1_gene;TEA001934.1_gene
MSTRG.29961.2	TEA014049.1_gene
MSTRG.75793.1	TEA007066.1_gene;TEA007068.1_gene
MSTRG.41902.1	TEA016607.1_gene;TEA016591.1_gene
MSTRG.96978.4	TEA007384.1_gene;TEA007375.1_gene;TEA007378.1_gene;TEA007376.1_gene
MSTRG.1923.2	TEA015342.1_gene
MSTRG.58400.1	TEA007737.1_gene;TEA007739.1_gene
MSTRG.150730.8	TEA007958.1_gene;TEA007960.1_gene;TEA007952.1_gene;TEA007955.1_gene
MSTRG.54181.1	TEA004303.1_gene;TEA004306.1_gene;TEA004302.1_gene
MSTRG.150225.1	TEA009996.1_gene;TEA009979.1_gene
MSTRG.69527.1	TEA018445.1_gene;TEA018429.1_gene;TEA018437.1_gene;TEA018441.1_gene;TEA018424.1_gene
MSTRG.114003.1	TEA005361.1_gene;TEA005365.1_gene;TEA005363.1_gene;TEA005367.1_gene;TEA005370.1_gene
MSTRG.19543.1	TEA014889.1_gene;TEA014883.1_gene
MSTRG.51444.3	TEA021295.1_gene
MSTRG.102320.1	TEA013773.1_gene;TEA013817.1_gene
MSTRG.106800.1	TEA007720.1_gene;TEA007709.1_gene;TEA007713.1_gene;TEA007715.1_gene;TEA007712.1_gene
MSTRG.53841.1	TEA017974.1_gene;TEA017967.1_gene
MSTRG.117317.1	TEA013870.1_gene;TEA013873.1_gene;TEA013871.1_gene
MSTRG.132966.1	TEA000483.1_gene;TEA000496.1_gene
MSTRG.20411.1	TEA012362.1_gene;TEA012359.1_gene;TEA012356.1_gene
MSTRG.89779.20	TEA018565.1_gene
MSTRG.96801.1	TEA009148.1_gene;TEA009146.1_gene;TEA009140.1_gene;TEA009144.1_gene;TEA009136.1_gene;TEA009149.1_gene;TEA009150.1_gene
MSTRG.7455.12	TEA024692.1_gene
MSTRG.74170.1	TEA009790.1_gene;TEA009815.1_gene
MSTRG.75914.1	TEA024774.1_gene;TEA024796.1_gene
MSTRG.132618.9	TEA005476.1_gene;TEA005484.1_gene;TEA005467.1_gene
MSTRG.36325.1	TEA019316.1_gene;TEA019315.1_gene;TEA019321.1_gene;TEA019318.1_gene
MSTRG.138887.1	TEA022335.1_gene;TEA022334.1_gene;TEA022332.1_gene
MSTRG.24425.1	TEA031996.1_gene;TEA032007.1_gene;TEA032015.1_gene;TEA032011.1_gene
MSTRG.63376.2	TEA012799.1_gene;TEA012801.1_gene;TEA012806.1_gene;TEA012798.1_gene
MSTRG.53219.1	TEA010477.1_gene;TEA010474.1_gene
MSTRG.21455.2	TEA016301.1_gene;TEA016303.1_gene
MSTRG.135141.1	TEA017705.1_gene;TEA017704.1_gene
MSTRG.106383.1	TEA016292.1_gene;TEA016293.1_gene
MSTRG.76816.1	TEA015391.1_gene;TEA015387.1_gene;TEA015376.1_gene
MSTRG.115591.12	TEA015403.1_gene
MSTRG.67352.2	TEA000056.1_gene;TEA000072.1_gene
MSTRG.47890.1	TEA028586.1_gene;TEA028616.1_gene
MSTRG.13922.1	TEA001170.1_gene;TEA001188.1_gene;TEA001190.1_gene;TEA001184.1_gene;TEA001164.1_gene
MSTRG.78111.2	TEA004721.1_gene;TEA004720.1_gene;TEA004716.1_gene
MSTRG.15164.2	TEA032171.1_gene;TEA032173.1_gene
MSTRG.147315.1	TEA003634.1_gene;TEA003642.1_gene;TEA003645.1_gene;TEA003630.1_gene
MSTRG.135985.1	TEA017561.1_gene;TEA017541.1_gene;TEA017556.1_gene;TEA017549.1_gene;TEA017566.1_gene
MSTRG.54814.1	TEA022065.1_gene
MSTRG.31702.5	TEA018458.1_gene;TEA018455.1_gene
MSTRG.30465.10	TEA019110.1_gene;TEA019149.1_gene;TEA019120.1_gene
MSTRG.134664.3	TEA027483.1_gene;TEA027502.1_gene;TEA027504.1_gene;TEA027499.1_gene
MSTRG.139455.1	TEA023721.1_gene
MSTRG.112554.2	TEA023189.1_gene;TEA023186.1_gene;TEA023188.1_gene;TEA023187.1_gene
MSTRG.90697.1	TEA003015.1_gene;TEA003016.1_gene
MSTRG.23823.1	TEA033668.1_gene;TEA033670.1_gene;TEA033671.1_gene;TEA033669.1_gene;TEA033673.1_gene
MSTRG.103764.1	TEA017338.1_gene;TEA017346.1_gene
MSTRG.148152.2	TEA027939.1_gene;TEA027947.1_gene;TEA027951.1_gene;TEA027946.1_gene
MSTRG.109508.2	TEA029245.1_gene;TEA029255.1_gene
MSTRG.96171.1	TEA018627.1_gene
MSTRG.119889.2	TEA010184.1_gene;TEA010186.1_gene;TEA010188.1_gene;TEA010187.1_gene;TEA010185.1_gene
MSTRG.83301.6	TEA021406.1_gene;TEA021405.1_gene;TEA021407.1_gene;TEA021409.1_gene;TEA021408.1_gene
MSTRG.84066.3	TEA013260.1_gene;TEA013253.1_gene
MSTRG.134835.1	TEA006376.1_gene;TEA006372.1_gene;TEA006367.1_gene;TEA006375.1_gene;TEA006371.1_gene
MSTRG.120288.1	TEA011068.1_gene
MSTRG.81520.1	TEA027423.1_gene
MSTRG.149835.1	TEA023935.1_gene
MSTRG.146338.1	TEA026218.1_gene;TEA026216.1_gene
MSTRG.23025.1	TEA015591.1_gene;TEA015596.1_gene;TEA015600.1_gene
MSTRG.99538.1	TEA016861.1_gene
MSTRG.137759.1	TEA031901.1_gene
MSTRG.71695.1	TEA003567.1_gene;TEA003572.1_gene;TEA003593.1_gene
MSTRG.27118.1	TEA019476.1_gene;TEA019465.1_gene;TEA019462.1_gene;TEA019473.1_gene
MSTRG.11653.1	TEA005178.1_gene
MSTRG.127027.1	TEA020459.1_gene
MSTRG.92829.1	TEA006721.1_gene;TEA006727.1_gene;TEA006729.1_gene;TEA006713.1_gene;TEA006724.1_gene;TEA006712.1_gene;TEA006726.1_gene;TEA006715.1_gene
MSTRG.80741.1	TEA027002.1_gene
MSTRG.64354.1	TEA000461.1_gene;TEA000465.1_gene;TEA000474.1_gene
MSTRG.50045.2	TEA015830.1_gene
MSTRG.58702.1	TEA029418.1_gene
MSTRG.59145.3	TEA008875.1_gene;TEA008876.1_gene
MSTRG.146573.7	TEA002310.1_gene
MSTRG.131133.1	TEA032410.1_gene
MSTRG.43972.2	TEA024111.1_gene;TEA024134.1_gene;TEA024122.1_gene
MSTRG.5660.2	TEA027773.1_gene
MSTRG.74370.11	TEA029401.1_gene
MSTRG.124725.1	TEA002683.1_gene;TEA002682.1_gene;TEA002674.1_gene;TEA002692.1_gene
MSTRG.129876.1	TEA007159.1_gene;TEA007158.1_gene;TEA007161.1_gene
MSTRG.108407.1	TEA025880.1_gene;TEA025894.1_gene
MSTRG.142592.2	TEA020349.1_gene;TEA020339.1_gene;TEA020343.1_gene;TEA020363.1_gene;TEA020347.1_gene
MSTRG.84259.2	TEA033010.1_gene;TEA033015.1_gene;TEA033005.1_gene;TEA033008.1_gene
MSTRG.6261.5	TEA030073.1_gene;TEA030078.1_gene;TEA030090.1_gene;TEA030092.1_gene;TEA030080.1_gene;TEA030066.1_gene
MSTRG.94630.5	TEA028514.1_gene;TEA028511.1_gene;TEA028510.1_gene;TEA028509.1_gene
MSTRG.83310.3	TEA021412.1_gene;TEA021406.1_gene;TEA021410.1_gene;TEA021409.1_gene;TEA021411.1_gene
MSTRG.60878.1	TEA013702.1_gene
MSTRG.45881.1	TEA009875.1_gene;TEA009876.1_gene
MSTRG.15525.2	TEA019788.1_gene
MSTRG.143912.3	TEA018053.1_gene
MSTRG.47155.1	TEA006142.1_gene;TEA006153.1_gene;TEA006138.1_gene
MSTRG.61178.2	TEA002643.1_gene;TEA002670.1_gene;TEA002665.1_gene
MSTRG.96345.1	TEA030826.1_gene;TEA030786.1_gene;TEA030811.1_gene
MSTRG.95781.1	TEA000909.1_gene;TEA000938.1_gene
MSTRG.66008.3	TEA014557.1_gene;TEA014554.1_gene;TEA014534.1_gene;TEA014555.1_gene
MSTRG.47543.9	TEA021762.1_gene;TEA021752.1_gene;TEA021764.1_gene;TEA021758.1_gene
MSTRG.23812.2	TEA033669.1_gene
MSTRG.120163.1	TEA019491.1_gene;TEA019480.1_gene;TEA019486.1_gene;TEA019479.1_gene
MSTRG.4421.1	TEA008966.1_gene
MSTRG.99318.1	TEA007466.1_gene
MSTRG.147710.1	TEA020659.1_gene;TEA020666.1_gene;TEA020664.1_gene
MSTRG.115633.1	TEA006844.1_gene;TEA006826.1_gene;TEA006842.1_gene;TEA006825.1_gene;TEA006850.1_gene
MSTRG.113438.1	TEA023601.1_gene;TEA023618.1_gene;TEA023592.1_gene;TEA023603.1_gene;TEA023586.1_gene
MSTRG.54968.7	TEA024729.1_gene;TEA024724.1_gene;TEA024741.1_gene
MSTRG.96668.1	TEA029110.1_gene;TEA029114.1_gene;TEA029097.1_gene;TEA029116.1_gene;TEA029095.1_gene
MSTRG.98134.3	TEA015236.1_gene;TEA015244.1_gene;TEA015247.1_gene;TEA015278.1_gene;TEA015260.1_gene;TEA015254.1_gene;TEA015281.1_gene
MSTRG.34678.1	TEA020528.1_gene;TEA020534.1_gene;TEA020500.1_gene;TEA020524.1_gene;TEA020530.1_gene;TEA020532.1_gene
MSTRG.47553.1	TEA021758.1_gene;TEA021764.1_gene;TEA021752.1_gene
MSTRG.141934.2	TEA017279.1_gene;TEA017276.1_gene
MSTRG.8140.1	TEA009404.1_gene
MSTRG.106727.4	TEA026137.1_gene;TEA026141.1_gene
MSTRG.62722.3	TEA028066.1_gene
MSTRG.151338.6	TEA031528.1_gene;TEA031529.1_gene
MSTRG.1062.1	TEA001783.1_gene;TEA001784.1_gene
MSTRG.136074.1	TEA008458.1_gene
MSTRG.6024.1	TEA006779.1_gene;TEA006784.1_gene;TEA006781.1_gene;TEA006782.1_gene
MSTRG.17206.1	TEA004261.1_gene
MSTRG.57447.2	TEA005000.1_gene;TEA004982.1_gene;TEA004991.1_gene
MSTRG.96071.2	TEA006879.1_gene;TEA006864.1_gene;TEA006872.1_gene;TEA006891.1_gene
MSTRG.117424.2	TEA026400.1_gene;TEA026411.1_gene
MSTRG.24678.2	TEA010571.1_gene
MSTRG.128464.7	TEA023387.1_gene
MSTRG.121475.9	TEA030983.1_gene;TEA030982.1_gene
MSTRG.98060.1	TEA015273.1_gene;TEA015270.1_gene;TEA015228.1_gene;TEA015264.1_gene;TEA015257.1_gene;TEA015243.1_gene
MSTRG.99806.1	TEA006381.1_gene;TEA006389.1_gene
MSTRG.76960.1	TEA019368.1_gene
MSTRG.137388.1	TEA014614.1_gene;TEA014592.1_gene;TEA014629.1_gene;TEA014644.1_gene;TEA014608.1_gene
MSTRG.43426.6	TEA026443.1_gene;TEA026440.1_gene;TEA026444.1_gene
MSTRG.35182.1	TEA011711.1_gene;TEA011697.1_gene
MSTRG.5182.1	TEA026475.1_gene;TEA026483.1_gene;TEA026473.1_gene
MSTRG.43955.4	TEA024111.1_gene
MSTRG.136466.2	TEA012593.1_gene;TEA012587.1_gene
MSTRG.123828.1	TEA017036.1_gene;TEA017033.1_gene;TEA017038.1_gene;TEA017037.1_gene
MSTRG.89956.1	TEA026883.1_gene;TEA026876.1_gene;TEA026880.1_gene
MSTRG.91407.1	TEA010762.1_gene;TEA010763.1_gene
MSTRG.40469.2	TEA025121.1_gene;TEA025122.1_gene;TEA025132.1_gene
MSTRG.103512.8	TEA027438.1_gene
MSTRG.67000.4	TEA004766.1_gene;TEA004764.1_gene;TEA004782.1_gene
MSTRG.10942.1	TEA029124.1_gene
MSTRG.67867.1	TEA028854.1_gene;TEA028866.1_gene;TEA028857.1_gene;TEA028847.1_gene;TEA028850.1_gene
MSTRG.72588.1	TEA004017.1_gene
MSTRG.111167.1	TEA010440.1_gene
MSTRG.53629.1	TEA027852.1_gene;TEA027839.1_gene;TEA027848.1_gene
MSTRG.40843.1	TEA011770.1_gene;TEA011773.1_gene
MSTRG.54969.1	TEA024729.1_gene;TEA024741.1_gene;TEA024724.1_gene
MSTRG.49599.1	TEA017529.1_gene
MSTRG.3147.1	TEA000799.1_gene;TEA000798.1_gene;TEA000801.1_gene;TEA000803.1_gene;TEA000804.1_gene;TEA000806.1_gene
MSTRG.71201.4	TEA006306.1_gene;TEA006303.1_gene;TEA006312.1_gene;TEA006311.1_gene;TEA006317.1_gene;TEA006307.1_gene
MSTRG.154550.1	TEA013499.1_gene
MSTRG.73762.1	TEA032351.1_gene;TEA032342.1_gene
MSTRG.32189.1	TEA030955.1_gene;TEA030953.1_gene
MSTRG.115643.2	TEA006825.1_gene;TEA006842.1_gene;TEA006844.1_gene;TEA006833.1_gene;TEA006850.1_gene
MSTRG.50868.1	TEA008661.1_gene;TEA008656.1_gene;TEA008662.1_gene
MSTRG.37729.1	TEA030117.1_gene
MSTRG.132688.1	TEA024929.1_gene;TEA024933.1_gene
MSTRG.110771.1	TEA006273.1_gene
MSTRG.32248.1	TEA012651.1_gene;TEA012668.1_gene
MSTRG.10089.1	TEA032815.1_gene;TEA032827.1_gene;TEA032820.1_gene
MSTRG.120897.1	TEA022275.1_gene;TEA022269.1_gene;TEA022268.1_gene;TEA022270.1_gene;TEA022276.1_gene
MSTRG.88017.1	TEA027619.1_gene
MSTRG.140547.1	TEA001791.1_gene;TEA001790.1_gene
MSTRG.91992.7	TEA033870.1_gene
MSTRG.146253.3	TEA004104.1_gene;TEA004102.1_gene;TEA004101.1_gene
MSTRG.98900.1	TEA011121.1_gene;TEA011123.1_gene
MSTRG.1913.2	TEA015337.1_gene
MSTRG.125486.1	TEA006052.1_gene;TEA006056.1_gene;TEA006047.1_gene;TEA006042.1_gene
MSTRG.26612.1	TEA008042.1_gene;TEA008043.1_gene
MSTRG.21936.5	TEA009313.1_gene
MSTRG.70954.1	TEA000965.1_gene
MSTRG.128294.1	TEA023215.1_gene
MSTRG.99113.2	TEA016175.1_gene
MSTRG.79531.13	TEA007734.1_gene;TEA007729.1_gene;TEA007728.1_gene
MSTRG.75849.2	TEA024776.1_gene;TEA024779.1_gene;TEA024781.1_gene;TEA024783.1_gene;TEA024773.1_gene;TEA024786.1_gene
MSTRG.1524.29	TEA021926.1_gene;TEA021911.1_gene;TEA021907.1_gene
MSTRG.55788.1	TEA009369.1_gene
MSTRG.50716.2	TEA001727.1_gene;TEA001718.1_gene;TEA001733.1_gene;TEA001708.1_gene;TEA001725.1_gene
MSTRG.1838.2	TEA025695.1_gene;TEA025698.1_gene;TEA025694.1_gene;TEA025692.1_gene;TEA025699.1_gene;TEA025693.1_gene;TEA025691.1_gene;TEA025690.1_gene
MSTRG.21414.1	TEA024388.1_gene
MSTRG.14778.1	TEA031558.1_gene
MSTRG.55024.1	TEA008271.1_gene;TEA008249.1_gene;TEA008281.1_gene
MSTRG.62190.3	TEA009550.1_gene;TEA009545.1_gene;TEA009551.1_gene;TEA009548.1_gene
MSTRG.130459.2	TEA019846.1_gene;TEA019844.1_gene;TEA019877.1_gene
MSTRG.21216.1	TEA014301.1_gene
MSTRG.137199.1	TEA018306.1_gene;TEA018308.1_gene;TEA018310.1_gene
MSTRG.113859.2	TEA005066.1_gene;TEA005022.1_gene
MSTRG.149265.1	TEA027805.1_gene;TEA027808.1_gene;TEA027819.1_gene;TEA027818.1_gene
MSTRG.33740.1	TEA012735.1_gene;TEA012726.1_gene;TEA012737.1_gene
MSTRG.18117.1	TEA005809.1_gene;TEA005804.1_gene
MSTRG.78111.1	TEA004721.1_gene;TEA004720.1_gene
MSTRG.98041.1	TEA015256.1_gene;TEA015232.1_gene;TEA015261.1_gene;TEA015248.1_gene;TEA015269.1_gene;TEA015265.1_gene
MSTRG.149272.4	TEA027821.1_gene;TEA027804.1_gene;TEA027826.1_gene;TEA027825.1_gene;TEA027815.1_gene;TEA027806.1_gene
MSTRG.93778.20	TEA021814.1_gene
MSTRG.38107.2	TEA013204.1_gene
MSTRG.109522.1	TEA029240.1_gene;TEA029241.1_gene;TEA029239.1_gene;TEA029257.1_gene;TEA029238.1_gene;TEA029250.1_gene;TEA029252.1_gene
MSTRG.17551.1	TEA020321.1_gene;TEA020319.1_gene;TEA020318.1_gene;TEA020322.1_gene
MSTRG.95365.1	TEA023563.1_gene
MSTRG.115953.1	TEA010121.1_gene;TEA010114.1_gene
MSTRG.83447.1	TEA023353.1_gene;TEA023352.1_gene;TEA023356.1_gene
MSTRG.127676.2	TEA008541.1_gene
MSTRG.79098.1	TEA006455.1_gene;TEA006450.1_gene;TEA006459.1_gene;TEA006445.1_gene;TEA006460.1_gene;TEA006465.1_gene;TEA006446.1_gene;TEA006451.1_gene
MSTRG.42173.1	TEA032482.1_gene;TEA032480.1_gene;TEA032473.1_gene;TEA032470.1_gene
MSTRG.144749.2	TEA027351.1_gene;TEA027367.1_gene
MSTRG.72965.1	TEA008728.1_gene;TEA008725.1_gene
MSTRG.30260.1	TEA025708.1_gene
MSTRG.147141.1	TEA029631.1_gene;TEA029639.1_gene;TEA029638.1_gene
MSTRG.16746.1	TEA011314.1_gene;TEA011311.1_gene;TEA011310.1_gene
MSTRG.28162.2	TEA014098.1_gene
MSTRG.49394.1	TEA007556.1_gene;TEA007573.1_gene;TEA007562.1_gene;TEA007568.1_gene;TEA007571.1_gene;TEA007565.1_gene
MSTRG.22191.1	TEA026317.1_gene;TEA026318.1_gene
MSTRG.36615.19	TEA029140.1_gene;TEA029145.1_gene
MSTRG.12605.2	TEA001080.1_gene
MSTRG.2986.3	TEA022778.1_gene;TEA022788.1_gene;TEA022781.1_gene
MSTRG.15574.1	TEA019782.1_gene
MSTRG.3990.1	TEA019450.1_gene
MSTRG.33722.1	TEA012744.1_gene;TEA012750.1_gene;TEA012710.1_gene
MSTRG.84028.3	TEA013236.1_gene;TEA013242.1_gene;TEA013249.1_gene
MSTRG.33959.5	TEA007602.1_gene;TEA007593.1_gene
MSTRG.98894.14	TEA011122.1_gene;TEA011123.1_gene;TEA011120.1_gene
MSTRG.14169.1	TEA009603.1_gene;TEA009596.1_gene
MSTRG.138369.2	TEA024918.1_gene
MSTRG.60869.2	TEA013703.1_gene
MSTRG.34341.1	TEA008186.1_gene;TEA008195.1_gene;TEA008187.1_gene
MSTRG.55663.1	TEA026791.1_gene;TEA026788.1_gene;TEA026789.1_gene;TEA026787.1_gene
MSTRG.12333.3	TEA025851.1_gene;TEA025835.1_gene;TEA025855.1_gene
MSTRG.137841.1	TEA025094.1_gene
MSTRG.2694.11	TEA032309.1_gene;TEA032308.1_gene;TEA032304.1_gene;TEA032302.1_gene;TEA032303.1_gene;TEA032306.1_gene
MSTRG.65912.1	TEA018154.1_gene;TEA018119.1_gene;TEA018125.1_gene;TEA018144.1_gene;TEA018110.1_gene
MSTRG.150196.1	TEA009972.1_gene;TEA009980.1_gene
MSTRG.153311.4	TEA026108.1_gene;TEA026121.1_gene;TEA026125.1_gene
MSTRG.133196.2	TEA016445.1_gene;TEA016447.1_gene;TEA016433.1_gene;TEA016440.1_gene;TEA016432.1_gene
MSTRG.118727.1	TEA029004.1_gene;TEA028996.1_gene;TEA028998.1_gene;TEA028997.1_gene;TEA028990.1_gene;TEA028999.1_gene
MSTRG.147607.1	TEA018791.1_gene
MSTRG.117005.1	TEA026776.1_gene;TEA026771.1_gene;TEA026770.1_gene;TEA026782.1_gene
MSTRG.45140.1	TEA031943.1_gene;TEA031944.1_gene;TEA031948.1_gene
MSTRG.149965.3	TEA002922.1_gene
MSTRG.92428.2	TEA018898.1_gene;TEA018896.1_gene;TEA018901.1_gene;TEA018903.1_gene;TEA018906.1_gene
MSTRG.124164.1	TEA020243.1_gene
MSTRG.76340.1	TEA014191.1_gene
MSTRG.8716.1	TEA002487.1_gene;TEA002480.1_gene
MSTRG.154886.1	TEA010597.1_gene;TEA010593.1_gene
MSTRG.149995.2	TEA002914.1_gene;TEA002934.1_gene
MSTRG.52620.6	TEA027019.1_gene;TEA027055.1_gene;TEA027044.1_gene;TEA027026.1_gene;TEA027066.1_gene
MSTRG.133420.1	TEA004597.1_gene;TEA004596.1_gene;TEA004599.1_gene;TEA004601.1_gene
MSTRG.103071.1	TEA016662.1_gene;TEA016654.1_gene
MSTRG.81813.1	TEA002385.1_gene;TEA002381.1_gene;TEA002375.1_gene;TEA002372.1_gene;TEA002376.1_gene
MSTRG.137394.3	TEA014608.1_gene;TEA014595.1_gene;TEA014614.1_gene;TEA014592.1_gene
MSTRG.129482.3	TEA019342.1_gene;TEA019339.1_gene
MSTRG.111887.1	TEA023176.1_gene;TEA023171.1_gene;TEA023162.1_gene;TEA023166.1_gene;TEA023172.1_gene;TEA023173.1_gene;TEA023174.1_gene;TEA023175.1_gene
MSTRG.4377.1	TEA008970.1_gene;TEA008944.1_gene
MSTRG.44160.4	TEA012918.1_gene;TEA012916.1_gene;TEA012926.1_gene;TEA012914.1_gene
MSTRG.20419.2	TEA012359.1_gene;TEA012355.1_gene;TEA012356.1_gene
MSTRG.77895.1	TEA025477.1_gene;TEA025474.1_gene;TEA025471.1_gene;TEA025473.1_gene
MSTRG.2213.4	TEA005601.1_gene;TEA005593.1_gene;TEA005595.1_gene;TEA005594.1_gene
MSTRG.138422.2	TEA002064.1_gene;TEA002065.1_gene;TEA002070.1_gene;TEA002076.1_gene;TEA002071.1_gene;TEA002092.1_gene;TEA002075.1_gene
MSTRG.9832.1	TEA013301.1_gene
MSTRG.134170.1	TEA010015.1_gene;TEA010018.1_gene
MSTRG.66692.7	TEA019074.1_gene;TEA019076.1_gene;TEA019088.1_gene;TEA019078.1_gene
MSTRG.114215.1	TEA022573.1_gene;TEA022557.1_gene;TEA022578.1_gene;TEA022568.1_gene;TEA022591.1_gene
MSTRG.2694.18	TEA032309.1_gene;TEA032306.1_gene;TEA032303.1_gene;TEA032308.1_gene;TEA032304.1_gene;TEA032302.1_gene
MSTRG.87289.3	TEA005407.1_gene;TEA005406.1_gene;TEA005409.1_gene
MSTRG.32381.3	TEA006010.1_gene;TEA006003.1_gene;TEA006015.1_gene
MSTRG.147609.2	TEA018791.1_gene
MSTRG.1923.3	TEA015342.1_gene
MSTRG.11853.1	TEA020154.1_gene;TEA020155.1_gene;TEA020153.1_gene;TEA020156.1_gene
MSTRG.128439.1	TEA011854.1_gene;TEA011855.1_gene;TEA011860.1_gene
MSTRG.1381.1	TEA002411.1_gene;TEA002412.1_gene
MSTRG.96347.1	TEA030801.1_gene;TEA030826.1_gene;TEA030811.1_gene
MSTRG.30582.9	TEA019117.1_gene
MSTRG.58374.1	TEA007741.1_gene
MSTRG.1805.3	TEA031665.1_gene;TEA031668.1_gene;TEA031664.1_gene
MSTRG.121525.18	TEA009265.1_gene
MSTRG.6002.1	TEA009426.1_gene;TEA009424.1_gene;TEA009427.1_gene
MSTRG.113724.1	TEA005058.1_gene;TEA005040.1_gene
MSTRG.76992.1	TEA009959.1_gene
MSTRG.13031.1	TEA000311.1_gene;TEA000304.1_gene
MSTRG.82473.6	TEA014276.1_gene
MSTRG.144996.1	TEA015096.1_gene;TEA015090.1_gene
MSTRG.28159.1	TEA014098.1_gene;TEA014100.1_gene
MSTRG.66008.2	TEA014534.1_gene;TEA014555.1_gene;TEA014554.1_gene;TEA014557.1_gene
MSTRG.8777.4	TEA002492.1_gene;TEA002473.1_gene
MSTRG.145316.51	TEA023221.1_gene
MSTRG.61923.1	TEA016764.1_gene;TEA016768.1_gene
MSTRG.77832.2	TEA030687.1_gene;TEA030697.1_gene
MSTRG.101181.1	TEA025215.1_gene;TEA025219.1_gene;TEA025216.1_gene;TEA025214.1_gene
MSTRG.56611.1	TEA030864.1_gene;TEA030861.1_gene
MSTRG.3989.1	TEA019450.1_gene
MSTRG.138731.4	TEA001869.1_gene;TEA001876.1_gene;TEA001868.1_gene;TEA001874.1_gene;TEA001878.1_gene;TEA001864.1_gene
MSTRG.52623.1	TEA027044.1_gene;TEA027055.1_gene;TEA027019.1_gene;TEA027026.1_gene;TEA027066.1_gene
MSTRG.124942.4	TEA023539.1_gene;TEA023549.1_gene;TEA023552.1_gene;TEA023540.1_gene
MSTRG.20098.2	TEA011376.1_gene;TEA011377.1_gene
MSTRG.5657.1	TEA027773.1_gene
MSTRG.85146.1	TEA016086.1_gene;TEA016080.1_gene
MSTRG.73469.1	TEA027086.1_gene;TEA027098.1_gene
MSTRG.15532.1	TEA019788.1_gene
MSTRG.541.1	TEA018659.1_gene;TEA018655.1_gene
MSTRG.43937.3	TEA020485.1_gene;TEA020481.1_gene
MSTRG.83658.1	TEA016929.1_gene;TEA016930.1_gene;TEA016932.1_gene
MSTRG.131224.1	TEA022512.1_gene;TEA022508.1_gene
MSTRG.32246.1	TEA012668.1_gene;TEA012651.1_gene
MSTRG.32379.10	TEA006004.1_gene;TEA006003.1_gene;TEA006015.1_gene;TEA006010.1_gene
MSTRG.49153.3	TEA020996.1_gene;TEA021009.1_gene
MSTRG.141504.1	TEA019032.1_gene;TEA019029.1_gene
MSTRG.9400.1	TEA011236.1_gene
MSTRG.107924.1	TEA033052.1_gene;TEA033055.1_gene;TEA033051.1_gene
MSTRG.29215.1	TEA015352.1_gene;TEA015349.1_gene;TEA015346.1_gene
MSTRG.136466.3	TEA012593.1_gene;TEA012587.1_gene
MSTRG.33958.5	TEA007593.1_gene;TEA007602.1_gene
MSTRG.113042.1	TEA001356.1_gene;TEA001354.1_gene;TEA001358.1_gene;TEA001348.1_gene;TEA001349.1_gene
MSTRG.11020.1	TEA023246.1_gene;TEA023242.1_gene
MSTRG.143722.1	TEA015799.1_gene
MSTRG.99611.1	TEA013562.1_gene
MSTRG.141698.3	TEA031320.1_gene
MSTRG.69829.1	TEA004960.1_gene;TEA004961.1_gene
MSTRG.88837.1	TEA025084.1_gene
MSTRG.43900.7	TEA020484.1_gene;TEA020483.1_gene
MSTRG.48880.1	TEA018836.1_gene;TEA018849.1_gene;TEA018842.1_gene
MSTRG.101159.7	TEA025219.1_gene;TEA025215.1_gene;TEA025214.1_gene;TEA025217.1_gene;TEA025223.1_gene;TEA025218.1_gene;TEA025211.1_gene;TEA025216.1_gene
MSTRG.130813.1	TEA008574.1_gene;TEA008570.1_gene;TEA008575.1_gene
MSTRG.128265.1	TEA006949.1_gene
MSTRG.121474.4	TEA030982.1_gene;TEA030983.1_gene
MSTRG.92164.1	TEA012351.1_gene;TEA012339.1_gene;TEA012342.1_gene;TEA012337.1_gene
MSTRG.86325.1	TEA011558.1_gene;TEA011555.1_gene
MSTRG.6166.1	TEA008802.1_gene
MSTRG.59602.1	TEA004975.1_gene
MSTRG.68779.2	TEA026041.1_gene;TEA026035.1_gene;TEA026057.1_gene
MSTRG.96103.1	TEA006871.1_gene;TEA006873.1_gene;TEA006874.1_gene;TEA006887.1_gene;TEA006892.1_gene;TEA006876.1_gene;TEA006866.1_gene;TEA006888.1_gene;TEA006890.1_gene;TEA006893.1_gene;TEA006878.1_gene;TEA006884.1_gene
MSTRG.31299.1	TEA021851.1_gene;TEA021861.1_gene;TEA021831.1_gene;TEA021864.1_gene;TEA021830.1_gene;TEA021856.1_gene;TEA021857.1_gene;TEA021819.1_gene;TEA021858.1_gene;TEA021865.1_gene
MSTRG.86271.1	TEA027197.1_gene;TEA027155.1_gene
MSTRG.147966.1	TEA022487.1_gene;TEA022490.1_gene;TEA022483.1_gene;TEA022482.1_gene;TEA022478.1_gene;TEA022488.1_gene
MSTRG.144158.1	TEA012052.1_gene
MSTRG.47400.3	TEA026095.1_gene;TEA026101.1_gene;TEA026090.1_gene
MSTRG.53455.2	TEA007878.1_gene;TEA007873.1_gene;TEA007872.1_gene
MSTRG.100028.6	TEA011346.1_gene;TEA011359.1_gene;TEA011335.1_gene;TEA011358.1_gene;TEA011353.1_gene;TEA011360.1_gene
MSTRG.130970.1	TEA023113.1_gene;TEA023106.1_gene;TEA023107.1_gene;TEA023111.1_gene
MSTRG.18392.13	TEA028278.1_gene;TEA028290.1_gene
MSTRG.92784.13	TEA028799.1_gene;TEA028800.1_gene
MSTRG.124681.5	TEA019238.1_gene;TEA019236.1_gene;TEA019241.1_gene;TEA019237.1_gene
MSTRG.310.3	TEA017866.1_gene;TEA017867.1_gene
MSTRG.32912.1	TEA029308.1_gene;TEA029316.1_gene;TEA029317.1_gene;TEA029314.1_gene;TEA029303.1_gene
MSTRG.106604.1	TEA013105.1_gene;TEA013100.1_gene;TEA013103.1_gene
MSTRG.88472.1	TEA016136.1_gene;TEA016151.1_gene;TEA016148.1_gene;TEA016137.1_gene;TEA016141.1_gene;TEA016150.1_gene;TEA016154.1_gene;TEA016144.1_gene
MSTRG.111639.6	TEA008818.1_gene;TEA008838.1_gene;TEA008831.1_gene;TEA008826.1_gene
MSTRG.54647.12	TEA004964.1_gene;TEA004966.1_gene;TEA004969.1_gene
MSTRG.41353.2	TEA010905.1_gene;TEA010913.1_gene;TEA010904.1_gene
MSTRG.105941.1	TEA004126.1_gene;TEA004133.1_gene
MSTRG.85358.1	TEA010398.1_gene;TEA010380.1_gene;TEA010393.1_gene
MSTRG.131241.2	TEA022531.1_gene;TEA022513.1_gene;TEA022528.1_gene;TEA022518.1_gene;TEA022516.1_gene
MSTRG.98060.4	TEA015257.1_gene;TEA015243.1_gene;TEA015264.1_gene;TEA015228.1_gene;TEA015273.1_gene;TEA015270.1_gene
MSTRG.124628.5	TEA002416.1_gene;TEA002419.1_gene;TEA002415.1_gene;TEA002413.1_gene
MSTRG.22684.1	TEA021430.1_gene
MSTRG.2213.13	TEA005601.1_gene;TEA005594.1_gene;TEA005593.1_gene;TEA005595.1_gene
MSTRG.151236.1	TEA033468.1_gene;TEA033469.1_gene;TEA033472.1_gene
MSTRG.4017.1	TEA019451.1_gene
MSTRG.44141.2	TEA012919.1_gene
MSTRG.36121.2	TEA004636.1_gene
MSTRG.120287.1	TEA011068.1_gene
MSTRG.121525.30	TEA009265.1_gene
MSTRG.104714.1	TEA033636.1_gene;TEA033637.1_gene;TEA033639.1_gene
MSTRG.55939.4	TEA009361.1_gene;TEA009376.1_gene;TEA009349.1_gene;TEA009355.1_gene
MSTRG.33701.1	TEA012721.1_gene
MSTRG.152225.1	TEA010657.1_gene;TEA010655.1_gene;TEA010654.1_gene;TEA010638.1_gene;TEA010646.1_gene;TEA010653.1_gene;TEA010650.1_gene
MSTRG.30670.1	TEA029134.1_gene
MSTRG.133709.1	TEA030259.1_gene;TEA030232.1_gene;TEA030225.1_gene;TEA030247.1_gene
MSTRG.28286.3	TEA022436.1_gene;TEA022428.1_gene;TEA022430.1_gene;TEA022431.1_gene
MSTRG.27855.1	TEA025042.1_gene;TEA025048.1_gene;TEA025054.1_gene;TEA025041.1_gene
MSTRG.135417.2	TEA006001.1_gene
MSTRG.114227.1	TEA022566.1_gene;TEA022557.1_gene;TEA022591.1_gene;TEA022556.1_gene;TEA022555.1_gene
MSTRG.12797.2	TEA000082.1_gene
MSTRG.118344.1	TEA020979.1_gene
MSTRG.124488.3	TEA017914.1_gene
MSTRG.97220.2	TEA033221.1_gene
MSTRG.115400.3	TEA013368.1_gene;TEA013367.1_gene;TEA013364.1_gene;TEA013366.1_gene
MSTRG.31251.1	TEA021832.1_gene;TEA021863.1_gene;TEA021867.1_gene;TEA021849.1_gene
MSTRG.105554.11	TEA000673.1_gene
MSTRG.25506.1	TEA031062.1_gene;TEA031057.1_gene;TEA031055.1_gene;TEA031051.1_gene;TEA031053.1_gene;TEA031049.1_gene;TEA031071.1_gene
MSTRG.27087.2	TEA019474.1_gene
MSTRG.27818.1	TEA031844.1_gene;TEA031841.1_gene
MSTRG.134095.2	TEA010012.1_gene;TEA010006.1_gene;TEA010011.1_gene
MSTRG.99894.9	TEA011357.1_gene;TEA011368.1_gene;TEA011351.1_gene;TEA011348.1_gene
MSTRG.31209.1	TEA021862.1_gene;TEA021828.1_gene;TEA021843.1_gene;TEA021825.1_gene
MSTRG.132990.3	TEA013334.1_gene
MSTRG.2584.1	TEA029454.1_gene;TEA029441.1_gene;TEA029447.1_gene;TEA029450.1_gene
MSTRG.59811.3	TEA029883.1_gene;TEA029899.1_gene;TEA029897.1_gene;TEA029913.1_gene
MSTRG.19275.4	TEA033086.1_gene;TEA033085.1_gene;TEA033084.1_gene;TEA033087.1_gene;TEA033092.1_gene;TEA033094.1_gene
MSTRG.6214.14	TEA030099.1_gene;TEA030069.1_gene
MSTRG.121511.3	TEA009265.1_gene;TEA009262.1_gene
MSTRG.59838.1	TEA029949.1_gene;TEA029951.1_gene;TEA029915.1_gene;TEA029888.1_gene
MSTRG.72307.1	TEA018602.1_gene;TEA018600.1_gene;TEA018610.1_gene;TEA018598.1_gene;TEA018603.1_gene;TEA018604.1_gene
MSTRG.95640.1	TEA014874.1_gene
MSTRG.44969.2	TEA023130.1_gene;TEA023138.1_gene;TEA023136.1_gene;TEA023128.1_gene
MSTRG.73142.1	TEA014967.1_gene;TEA014969.1_gene;TEA014970.1_gene;TEA014971.1_gene
MSTRG.59540.1	TEA010922.1_gene;TEA010919.1_gene;TEA010918.1_gene;TEA010921.1_gene;TEA010920.1_gene
MSTRG.74126.1	TEA009800.1_gene;TEA009802.1_gene;TEA009810.1_gene;TEA009776.1_gene;TEA009806.1_gene;TEA009792.1_gene;TEA009768.1_gene
MSTRG.25193.1	TEA010998.1_gene;TEA010985.1_gene
MSTRG.49314.1	TEA030575.1_gene;TEA030579.1_gene
MSTRG.11852.1	TEA020146.1_gene;TEA020157.1_gene;TEA020153.1_gene
MSTRG.17070.4	TEA026380.1_gene
MSTRG.124084.14	TEA007524.1_gene;TEA007518.1_gene;TEA007521.1_gene;TEA007519.1_gene;TEA007526.1_gene;TEA007522.1_gene;TEA007523.1_gene;TEA007525.1_gene
MSTRG.19656.2	TEA008915.1_gene;TEA008910.1_gene;TEA008917.1_gene;TEA008919.1_gene;TEA008916.1_gene;TEA008913.1_gene
MSTRG.67660.1	TEA021245.1_gene;TEA021249.1_gene;TEA021247.1_gene;TEA021241.1_gene
MSTRG.102687.1	TEA032871.1_gene;TEA032853.1_gene;TEA032848.1_gene
MSTRG.102951.2	TEA020131.1_gene;TEA020132.1_gene;TEA020135.1_gene
MSTRG.24370.1	TEA031992.1_gene;TEA032035.1_gene;TEA032031.1_gene
MSTRG.10.1	TEA014515.1_gene;TEA014525.1_gene;TEA014514.1_gene;TEA014521.1_gene;TEA014520.1_gene;TEA014517.1_gene
MSTRG.153275.1	TEA026118.1_gene;TEA026117.1_gene;TEA026112.1_gene;TEA026128.1_gene
MSTRG.110491.1	TEA024502.1_gene;TEA024506.1_gene;TEA024501.1_gene;TEA024505.1_gene;TEA024503.1_gene
MSTRG.4010.5	TEA019450.1_gene;TEA019449.1_gene
MSTRG.110033.1	TEA026362.1_gene;TEA026358.1_gene;TEA026361.1_gene
MSTRG.50717.1	TEA001731.1_gene;TEA001706.1_gene
MSTRG.82474.8	TEA014276.1_gene
MSTRG.108736.1	TEA027921.1_gene;TEA027920.1_gene;TEA027930.1_gene;TEA027929.1_gene;TEA027926.1_gene;TEA027919.1_gene
MSTRG.43957.2	TEA024111.1_gene
MSTRG.138761.1	TEA001873.1_gene;TEA001866.1_gene;TEA001870.1_gene;TEA001877.1_gene;TEA001871.1_gene;TEA001879.1_gene;TEA001875.1_gene
MSTRG.144415.2	TEA010519.1_gene
MSTRG.69839.1	TEA028893.1_gene;TEA028895.1_gene;TEA028909.1_gene
MSTRG.74738.1	TEA022264.1_gene;TEA022261.1_gene;TEA022260.1_gene
MSTRG.143366.1	TEA019713.1_gene;TEA019726.1_gene
MSTRG.43937.5	TEA020485.1_gene;TEA020481.1_gene
MSTRG.90657.2	TEA033150.1_gene;TEA033159.1_gene;TEA033147.1_gene
MSTRG.92666.1	TEA017910.1_gene;TEA017907.1_gene
MSTRG.75832.2	TEA024793.1_gene
MSTRG.17338.1	TEA004286.1_gene;TEA004246.1_gene;TEA004255.1_gene;TEA004221.1_gene;TEA004223.1_gene;TEA004224.1_gene;TEA004264.1_gene
MSTRG.37504.1	TEA004509.1_gene;TEA004510.1_gene
MSTRG.84128.1	TEA013256.1_gene;TEA013248.1_gene
MSTRG.32898.1	TEA033830.1_gene;TEA033833.1_gene;TEA033860.1_gene;TEA033846.1_gene;TEA033819.1_gene;TEA033853.1_gene;TEA033862.1_gene;TEA033829.1_gene
MSTRG.92206.5	TEA007402.1_gene;TEA007396.1_gene
MSTRG.115614.1	TEA015405.1_gene
MSTRG.84193.8	TEA013246.1_gene;TEA013239.1_gene;TEA013245.1_gene
MSTRG.46949.1	TEA003052.1_gene;TEA003048.1_gene;TEA003049.1_gene;TEA003051.1_gene
MSTRG.146176.2	TEA018588.1_gene
MSTRG.952.2	TEA009747.1_gene
MSTRG.399.1	TEA017865.1_gene
MSTRG.120541.1	TEA026888.1_gene
MSTRG.89779.3	TEA018565.1_gene;TEA018563.1_gene;TEA018562.1_gene
MSTRG.121871.1	TEA025783.1_gene
MSTRG.121396.1	TEA030698.1_gene;TEA030700.1_gene;TEA030701.1_gene;TEA030704.1_gene;TEA030699.1_gene;TEA030703.1_gene;TEA030702.1_gene
MSTRG.126993.1	TEA018255.1_gene
MSTRG.125420.1	TEA001848.1_gene
MSTRG.124223.1	TEA020259.1_gene;TEA020248.1_gene;TEA020260.1_gene;TEA020253.1_gene
MSTRG.261.2	TEA005251.1_gene;TEA005252.1_gene
MSTRG.105562.1	TEA000655.1_gene;TEA000661.1_gene;TEA000650.1_gene;TEA000671.1_gene
MSTRG.62732.1	TEA028054.1_gene;TEA028066.1_gene
MSTRG.67528.1	TEA029972.1_gene;TEA030004.1_gene;TEA029992.1_gene;TEA030003.1_gene;TEA029997.1_gene
MSTRG.44540.8	TEA010253.1_gene
MSTRG.86834.1	TEA007080.1_gene;TEA007104.1_gene;TEA007083.1_gene
MSTRG.101072.1	TEA024572.1_gene;TEA024588.1_gene;TEA024591.1_gene
MSTRG.129981.2	TEA001919.1_gene;TEA001948.1_gene;TEA001937.1_gene
MSTRG.93778.14	TEA021814.1_gene
MSTRG.109334.1	TEA001412.1_gene
MSTRG.7412.1	TEA025272.1_gene;TEA025275.1_gene;TEA025273.1_gene
MSTRG.101242.1	TEA005225.1_gene
MSTRG.111423.1	TEA003362.1_gene;TEA003369.1_gene;TEA003375.1_gene
MSTRG.29449.3	TEA020719.1_gene;TEA020717.1_gene
MSTRG.152370.1	TEA008496.1_gene;TEA008500.1_gene
MSTRG.147830.1	TEA030209.1_gene;TEA030190.1_gene;TEA030210.1_gene;TEA030199.1_gene;TEA030173.1_gene;TEA030213.1_gene;TEA030183.1_gene
MSTRG.79483.1	TEA007722.1_gene;TEA007727.1_gene;TEA007735.1_gene
MSTRG.45423.1	TEA006987.1_gene
MSTRG.76415.1	TEA004335.1_gene
MSTRG.91146.3	TEA005887.1_gene;TEA005880.1_gene;TEA005941.1_gene;TEA005920.1_gene
MSTRG.68594.5	TEA024338.1_gene
MSTRG.114217.1	TEA022573.1_gene;TEA022566.1_gene;TEA022578.1_gene;TEA022568.1_gene;TEA022591.1_gene
MSTRG.52037.1	TEA024372.1_gene;TEA024375.1_gene;TEA024370.1_gene
MSTRG.154295.1	TEA008080.1_gene
MSTRG.69950.2	TEA027874.1_gene;TEA027872.1_gene
MSTRG.105480.1	TEA000656.1_gene;TEA000653.1_gene
MSTRG.121525.47	TEA009265.1_gene
MSTRG.142697.1	TEA020342.1_gene;TEA020340.1_gene;TEA020325.1_gene;TEA020332.1_gene
MSTRG.36623.1	TEA029140.1_gene
MSTRG.129995.2	TEA001918.1_gene;TEA001933.1_gene
MSTRG.28034.20	TEA005977.1_gene;TEA005994.1_gene
MSTRG.68475.1	TEA020761.1_gene;TEA020750.1_gene;TEA020753.1_gene
MSTRG.2609.1	TEA029451.1_gene
MSTRG.17069.26	TEA026378.1_gene
MSTRG.2214.1	TEA005601.1_gene;TEA005593.1_gene;TEA005595.1_gene;TEA005594.1_gene
MSTRG.35084.8	TEA011702.1_gene;TEA011703.1_gene;TEA011690.1_gene;TEA011688.1_gene;TEA011701.1_gene
MSTRG.7338.1	TEA025288.1_gene;TEA025296.1_gene
MSTRG.82718.6	TEA017265.1_gene
MSTRG.92525.1	TEA006415.1_gene
MSTRG.99936.1	TEA011337.1_gene
MSTRG.96674.1	TEA029116.1_gene;TEA029095.1_gene;TEA029097.1_gene;TEA029114.1_gene;TEA029110.1_gene;TEA029112.1_gene
MSTRG.30818.1	TEA021143.1_gene;TEA021133.1_gene;TEA021141.1_gene;TEA021145.1_gene;TEA021140.1_gene
MSTRG.3498.1	TEA001375.1_gene
MSTRG.119739.5	TEA001454.1_gene;TEA001477.1_gene;TEA001515.1_gene;TEA001520.1_gene;TEA001453.1_gene;TEA001481.1_gene;TEA001480.1_gene
MSTRG.4146.1	TEA030948.1_gene;TEA030944.1_gene;TEA030951.1_gene;TEA030938.1_gene
MSTRG.73276.1	TEA031580.1_gene
MSTRG.24196.1	TEA004461.1_gene
MSTRG.103224.1	TEA000864.1_gene;TEA000851.1_gene
MSTRG.105008.1	TEA031039.1_gene;TEA031038.1_gene;TEA031042.1_gene;TEA031043.1_gene;TEA031044.1_gene
MSTRG.24102.1	TEA001009.1_gene;TEA001001.1_gene;TEA000998.1_gene;TEA001011.1_gene
MSTRG.40692.1	TEA016494.1_gene;TEA016490.1_gene
MSTRG.138112.16	TEA003620.1_gene;TEA003615.1_gene;TEA003624.1_gene;TEA003625.1_gene;TEA003623.1_gene;TEA003616.1_gene
MSTRG.91502.1	TEA017802.1_gene
MSTRG.118574.2	TEA017781.1_gene;TEA017770.1_gene;TEA017771.1_gene;TEA017793.1_gene;TEA017776.1_gene
MSTRG.37905.1	TEA005110.1_gene;TEA005132.1_gene;TEA005151.1_gene;TEA005144.1_gene;TEA005131.1_gene
MSTRG.81449.1	TEA023900.1_gene;TEA023901.1_gene
MSTRG.100538.1	TEA003044.1_gene;TEA003042.1_gene;TEA003040.1_gene
MSTRG.133187.1	TEA016438.1_gene;TEA016445.1_gene;TEA016432.1_gene;TEA016440.1_gene;TEA016433.1_gene
MSTRG.67796.1	TEA001127.1_gene;TEA001124.1_gene
MSTRG.133872.1	TEA025310.1_gene;TEA025300.1_gene
MSTRG.54334.1	TEA015913.1_gene
MSTRG.130257.4	TEA005636.1_gene;TEA005648.1_gene
MSTRG.95231.2	TEA002549.1_gene;TEA002552.1_gene;TEA002547.1_gene
MSTRG.7766.3	TEA012877.1_gene
MSTRG.152698.1	TEA032973.1_gene
MSTRG.86938.3	TEA011628.1_gene;TEA011633.1_gene;TEA011641.1_gene;TEA011637.1_gene;TEA011613.1_gene
MSTRG.101322.1	TEA031736.1_gene;TEA031742.1_gene;TEA031738.1_gene;TEA031740.1_gene;TEA031739.1_gene;TEA031746.1_gene
MSTRG.72121.3	TEA004616.1_gene;TEA004618.1_gene;TEA004608.1_gene;TEA004617.1_gene
MSTRG.83009.1	TEA012300.1_gene;TEA012285.1_gene;TEA012308.1_gene;TEA012299.1_gene;TEA012284.1_gene;TEA012304.1_gene;TEA012282.1_gene
MSTRG.51425.1	TEA021309.1_gene;TEA021294.1_gene;TEA021308.1_gene;TEA021306.1_gene
MSTRG.138315.1	TEA008046.1_gene;TEA008049.1_gene
MSTRG.48188.1	TEA007446.1_gene;TEA034006.1_gene;TEA007438.1_gene
MSTRG.18394.6	TEA028290.1_gene;TEA028278.1_gene
MSTRG.43540.1	TEA032550.1_gene;TEA032552.1_gene
MSTRG.98953.1	TEA016211.1_gene;TEA016174.1_gene;TEA016191.1_gene;TEA016220.1_gene;TEA016231.1_gene
MSTRG.29446.3	TEA020713.1_gene;TEA020719.1_gene;TEA020716.1_gene
MSTRG.56350.1	TEA000884.1_gene;TEA000882.1_gene
MSTRG.95713.1	TEA000933.1_gene;TEA000937.1_gene
MSTRG.40444.1	TEA025124.1_gene
MSTRG.88138.1	TEA006922.1_gene;TEA006926.1_gene;TEA006929.1_gene;TEA006920.1_gene
MSTRG.79816.1	TEA017693.1_gene;TEA017692.1_gene
MSTRG.108782.1	TEA019235.1_gene;TEA019231.1_gene;TEA019234.1_gene
MSTRG.89864.1	TEA024663.1_gene;TEA024665.1_gene;TEA024668.1_gene
MSTRG.22765.1	TEA021417.1_gene;TEA021427.1_gene;TEA021421.1_gene;TEA021441.1_gene;TEA021462.1_gene;TEA021451.1_gene;TEA021440.1_gene;TEA021463.1_gene;TEA021433.1_gene
MSTRG.32358.1	TEA012672.1_gene;TEA012661.1_gene;TEA012666.1_gene
MSTRG.65084.1	TEA004211.1_gene
MSTRG.96953.2	TEA007379.1_gene;TEA007386.1_gene
MSTRG.36262.1	TEA014746.1_gene;TEA014741.1_gene
MSTRG.131060.1	TEA012559.1_gene;TEA012566.1_gene;TEA012564.1_gene;TEA012563.1_gene;TEA012561.1_gene
MSTRG.110084.31	TEA031765.1_gene;TEA031763.1_gene;TEA031766.1_gene;TEA031764.1_gene;TEA031767.1_gene;TEA031768.1_gene
MSTRG.22655.1	TEA000586.1_gene
MSTRG.64875.1	TEA029156.1_gene;TEA029155.1_gene;TEA029158.1_gene;TEA029148.1_gene
MSTRG.110960.1	TEA018982.1_gene;TEA018981.1_gene;TEA018973.1_gene;TEA018976.1_gene;TEA018986.1_gene
MSTRG.127034.1	TEA020444.1_gene;TEA020459.1_gene
MSTRG.85657.2	TEA023805.1_gene
MSTRG.142045.1	TEA029470.1_gene;TEA029473.1_gene;TEA029465.1_gene
MSTRG.79195.6	TEA006454.1_gene;TEA006462.1_gene
MSTRG.25483.1	TEA031072.1_gene;TEA031060.1_gene
MSTRG.77601.3	TEA013132.1_gene;TEA013135.1_gene;TEA013128.1_gene;TEA013133.1_gene;TEA013126.1_gene;TEA013131.1_gene
MSTRG.8741.1	TEA002463.1_gene;TEA002480.1_gene;TEA002485.1_gene
MSTRG.53346.1	TEA019282.1_gene;TEA019297.1_gene;TEA019286.1_gene;TEA019275.1_gene;TEA019290.1_gene;TEA019293.1_gene;TEA019281.1_gene;TEA019299.1_gene;TEA019287.1_gene
MSTRG.118561.1	TEA017783.1_gene;TEA017791.1_gene
MSTRG.118392.1	TEA005164.1_gene
MSTRG.131004.2	TEA023104.1_gene;TEA023110.1_gene
MSTRG.50142.1	TEA015827.1_gene
MSTRG.100691.1	TEA002215.1_gene
MSTRG.28286.2	TEA022431.1_gene;TEA022437.1_gene;TEA022430.1_gene;TEA022436.1_gene
MSTRG.34248.1	TEA013273.1_gene;TEA013280.1_gene;TEA013278.1_gene
MSTRG.93362.2	TEA008994.1_gene;TEA008997.1_gene;TEA008998.1_gene;TEA008989.1_gene;TEA008996.1_gene;TEA008992.1_gene;TEA008988.1_gene
MSTRG.51827.12	TEA021110.1_gene;TEA021065.1_gene;TEA021103.1_gene
MSTRG.43167.1	TEA026747.1_gene;TEA026748.1_gene
MSTRG.124680.1	TEA019238.1_gene;TEA019236.1_gene;TEA019237.1_gene;TEA019241.1_gene
MSTRG.128735.5	TEA027225.1_gene;TEA027226.1_gene;TEA027224.1_gene;TEA027222.1_gene
MSTRG.38550.1	TEA012699.1_gene;TEA012681.1_gene
MSTRG.125852.1	TEA009038.1_gene;TEA009044.1_gene;TEA009040.1_gene;TEA009047.1_gene;TEA009045.1_gene;TEA009046.1_gene;TEA009043.1_gene
MSTRG.90060.9	TEA011421.1_gene
MSTRG.92861.1	TEA000687.1_gene;TEA000686.1_gene
MSTRG.135288.1	TEA010663.1_gene;TEA010677.1_gene;TEA010667.1_gene;TEA010664.1_gene
MSTRG.19355.1	TEA019220.1_gene;TEA019226.1_gene;TEA019223.1_gene;TEA019228.1_gene
MSTRG.102510.2	TEA003609.1_gene;TEA003602.1_gene;TEA003603.1_gene;TEA003606.1_gene
MSTRG.11100.1	TEA022249.1_gene;TEA022257.1_gene;TEA022254.1_gene;TEA022259.1_gene
MSTRG.108279.1	TEA012640.1_gene;TEA012615.1_gene;TEA012637.1_gene;TEA012617.1_gene;TEA012614.1_gene;TEA012618.1_gene;TEA012636.1_gene
MSTRG.15820.1	TEA003476.1_gene;TEA003471.1_gene;TEA003480.1_gene
MSTRG.101562.1	TEA025331.1_gene;TEA025316.1_gene
MSTRG.107077.1	TEA015637.1_gene;TEA015639.1_gene
MSTRG.86506.1	TEA016612.1_gene;TEA016616.1_gene;TEA016615.1_gene;TEA016613.1_gene
MSTRG.54380.3	TEA015919.1_gene;TEA015926.1_gene;TEA015900.1_gene;TEA015908.1_gene;TEA015920.1_gene
MSTRG.125048.1	TEA019772.1_gene;TEA019769.1_gene;TEA019763.1_gene
MSTRG.27752.2	TEA013963.1_gene
MSTRG.89844.1	TEA018557.1_gene
MSTRG.84724.1	TEA010750.1_gene;TEA010736.1_gene
MSTRG.89502.1	TEA025553.1_gene;TEA025565.1_gene;TEA025583.1_gene;TEA025540.1_gene;TEA025523.1_gene;TEA025526.1_gene;TEA025568.1_gene
MSTRG.2594.23	TEA029450.1_gene;TEA029447.1_gene;TEA029441.1_gene;TEA029454.1_gene
MSTRG.63971.5	TEA010713.1_gene;TEA010708.1_gene;TEA010718.1_gene
MSTRG.83461.1	TEA023352.1_gene;TEA023354.1_gene;TEA023353.1_gene;TEA023356.1_gene
MSTRG.45142.1	TEA031948.1_gene;TEA031944.1_gene;TEA031943.1_gene
MSTRG.108618.1	TEA027141.1_gene;TEA027139.1_gene;TEA027144.1_gene;TEA027140.1_gene
MSTRG.97814.4	TEA026691.1_gene;TEA026701.1_gene;TEA026697.1_gene;TEA026698.1_gene;TEA026694.1_gene;TEA026692.1_gene;TEA026696.1_gene
MSTRG.30582.7	TEA019117.1_gene
MSTRG.13572.1	TEA020774.1_gene;TEA020769.1_gene
MSTRG.105104.1	TEA014914.1_gene;TEA014916.1_gene;TEA014909.1_gene;TEA014918.1_gene
MSTRG.84066.2	TEA013260.1_gene;TEA013253.1_gene
MSTRG.132535.1	TEA021045.1_gene;TEA021046.1_gene;TEA021044.1_gene;TEA021057.1_gene
MSTRG.75130.2	TEA027271.1_gene
MSTRG.72090.1	TEA017459.1_gene
MSTRG.27529.1	TEA018082.1_gene;TEA018083.1_gene;TEA018086.1_gene
MSTRG.3993.1	TEA019450.1_gene
MSTRG.89039.1	TEA012220.1_gene;TEA012202.1_gene
MSTRG.68449.4	TEA020734.1_gene;TEA020757.1_gene;TEA020741.1_gene
MSTRG.34485.6	TEA009474.1_gene;TEA009459.1_gene;TEA009447.1_gene;TEA009453.1_gene;TEA009470.1_gene;TEA009455.1_gene;TEA009457.1_gene
MSTRG.133971.1	TEA008427.1_gene;TEA008416.1_gene
MSTRG.72787.1	TEA015485.1_gene;TEA015486.1_gene;TEA015469.1_gene;TEA015483.1_gene;TEA015470.1_gene
MSTRG.85660.1	TEA023791.1_gene
MSTRG.41377.8	TEA010890.1_gene;TEA010900.1_gene;TEA010883.1_gene;TEA010908.1_gene
MSTRG.149334.3	TEA027814.1_gene;TEA027810.1_gene;TEA027807.1_gene
MSTRG.143912.7	TEA018053.1_gene
MSTRG.108633.1	TEA011085.1_gene;TEA011084.1_gene;TEA011082.1_gene
MSTRG.29446.1	TEA020713.1_gene;TEA020716.1_gene;TEA020719.1_gene
MSTRG.140463.1	TEA013449.1_gene;TEA013450.1_gene;TEA013447.1_gene;TEA013446.1_gene
MSTRG.69545.1	TEA018430.1_gene;TEA018427.1_gene;TEA018436.1_gene
MSTRG.125743.1	TEA001210.1_gene;TEA001214.1_gene;TEA001206.1_gene
MSTRG.80998.1	TEA015169.1_gene;TEA015170.1_gene;TEA015171.1_gene
MSTRG.134597.4	TEA027487.1_gene;TEA027478.1_gene;TEA027488.1_gene
MSTRG.3491.2	TEA001371.1_gene;TEA001375.1_gene
MSTRG.13623.1	TEA020772.1_gene;TEA020767.1_gene
MSTRG.59958.1	TEA029894.1_gene;TEA029905.1_gene;TEA029950.1_gene;TEA029896.1_gene
MSTRG.104967.1	TEA028159.1_gene;TEA028154.1_gene;TEA028152.1_gene
MSTRG.124989.3	TEA023535.1_gene;TEA023541.1_gene;TEA023524.1_gene;TEA023550.1_gene;TEA023530.1_gene
MSTRG.15253.2	TEA023911.1_gene
MSTRG.122792.2	TEA010690.1_gene
MSTRG.132618.4	TEA005467.1_gene;TEA005484.1_gene;TEA005476.1_gene
MSTRG.61607.1	TEA001626.1_gene;TEA001647.1_gene;TEA001652.1_gene
MSTRG.145290.1	TEA023224.1_gene;TEA023232.1_gene;TEA023219.1_gene;TEA023218.1_gene
MSTRG.107394.1	TEA021030.1_gene;TEA021036.1_gene
MSTRG.80175.1	TEA027237.1_gene;TEA027236.1_gene;TEA027242.1_gene;TEA027233.1_gene;TEA027235.1_gene;TEA027228.1_gene;TEA027238.1_gene
MSTRG.133887.1	TEA025306.1_gene;TEA025308.1_gene;TEA025311.1_gene;TEA025305.1_gene;TEA025302.1_gene
MSTRG.40849.2	TEA011773.1_gene;TEA011776.1_gene;TEA011770.1_gene
MSTRG.126050.2	TEA033293.1_gene;TEA033292.1_gene
MSTRG.16443.2	TEA033547.1_gene;TEA033541.1_gene
MSTRG.40233.1	TEA033560.1_gene
MSTRG.62470.3	TEA019307.1_gene
MSTRG.104980.1	TEA031866.1_gene;TEA031867.1_gene
MSTRG.17643.1	TEA002527.1_gene;TEA002519.1_gene;TEA002514.1_gene
MSTRG.83226.1	TEA016016.1_gene
MSTRG.113850.1	TEA005076.1_gene;TEA005064.1_gene;TEA005025.1_gene;TEA005069.1_gene;TEA005024.1_gene;TEA005042.1_gene
MSTRG.131504.1	TEA001290.1_gene;TEA001284.1_gene;TEA001292.1_gene;TEA001297.1_gene
MSTRG.98650.1	TEA014469.1_gene;TEA014427.1_gene
MSTRG.98787.1	TEA031117.1_gene;TEA031127.1_gene;TEA031124.1_gene;TEA031129.1_gene;TEA031118.1_gene;TEA031123.1_gene;TEA031121.1_gene
MSTRG.26953.1	TEA029791.1_gene;TEA029786.1_gene;TEA029787.1_gene
MSTRG.42416.1	TEA002245.1_gene;TEA002237.1_gene;TEA002249.1_gene;TEA002244.1_gene;TEA002241.1_gene;TEA002243.1_gene;TEA002236.1_gene;TEA002235.1_gene
MSTRG.129480.1	TEA019342.1_gene;TEA019339.1_gene
MSTRG.151655.12	TEA032656.1_gene;TEA032638.1_gene;TEA032643.1_gene;TEA032646.1_gene;TEA032647.1_gene
MSTRG.154263.1	TEA008093.1_gene
MSTRG.38122.1	TEA013208.1_gene;TEA013214.1_gene;TEA013206.1_gene
MSTRG.109419.1	TEA003211.1_gene;TEA003216.1_gene;TEA003215.1_gene
MSTRG.36021.1	TEA009188.1_gene
MSTRG.63011.1	TEA030407.1_gene
MSTRG.38078.21	TEA013186.1_gene
MSTRG.4.9	TEA014515.1_gene;TEA014514.1_gene
MSTRG.46971.1	TEA021469.1_gene;TEA021472.1_gene
MSTRG.4127.1	TEA021396.1_gene;TEA021391.1_gene
MSTRG.12161.1	TEA001570.1_gene;TEA001577.1_gene;TEA001576.1_gene
MSTRG.134310.1	TEA014586.1_gene;TEA014584.1_gene;TEA014589.1_gene;TEA014585.1_gene;TEA014587.1_gene
MSTRG.49734.2	TEA005318.1_gene;TEA005317.1_gene;TEA005309.1_gene;TEA005313.1_gene;TEA005328.1_gene;TEA005327.1_gene;TEA005315.1_gene;TEA005320.1_gene
MSTRG.121396.3	TEA030699.1_gene;TEA030703.1_gene;TEA030702.1_gene;TEA030698.1_gene;TEA030700.1_gene;TEA030701.1_gene;TEA030704.1_gene
MSTRG.29446.2	TEA020715.1_gene;TEA020713.1_gene;TEA020716.1_gene;TEA020719.1_gene
MSTRG.1805.2	TEA031664.1_gene;TEA031668.1_gene;TEA031665.1_gene
MSTRG.127939.1	TEA031680.1_gene;TEA031675.1_gene
MSTRG.39058.1	TEA029052.1_gene
MSTRG.16053.14	TEA022943.1_gene
MSTRG.75389.1	TEA008793.1_gene;TEA008801.1_gene;TEA008798.1_gene;TEA008800.1_gene;TEA008780.1_gene;TEA008792.1_gene
MSTRG.80971.1	TEA028532.1_gene;TEA028533.1_gene
MSTRG.152731.34	TEA014167.1_gene
MSTRG.1418.1	TEA027291.1_gene
MSTRG.70720.2	TEA005531.1_gene;TEA005525.1_gene;TEA005533.1_gene;TEA005527.1_gene;TEA005534.1_gene;TEA005532.1_gene;TEA005526.1_gene
MSTRG.11517.1	TEA005708.1_gene;TEA005704.1_gene
MSTRG.28200.1	TEA033618.1_gene;TEA033623.1_gene;TEA033617.1_gene
MSTRG.7233.3	TEA001445.1_gene
MSTRG.55276.1	TEA026948.1_gene;TEA026949.1_gene;TEA026959.1_gene;TEA026938.1_gene;TEA026952.1_gene
MSTRG.120284.5	TEA011068.1_gene
MSTRG.53134.2	TEA010496.1_gene;TEA010473.1_gene
MSTRG.89497.1	TEA025540.1_gene;TEA025553.1_gene;TEA025565.1_gene;TEA025577.1_gene;TEA025572.1_gene;TEA025583.1_gene;TEA025526.1_gene;TEA025523.1_gene
MSTRG.65913.1	TEA018125.1_gene;TEA018110.1_gene;TEA018144.1_gene;TEA018154.1_gene
MSTRG.17267.1	TEA004240.1_gene
MSTRG.135568.1	TEA014803.1_gene
MSTRG.70350.2	TEA011943.1_gene;TEA011928.1_gene
MSTRG.38016.1	TEA005118.1_gene;TEA005116.1_gene
MSTRG.16.1	TEA014504.1_gene;TEA014501.1_gene;TEA014510.1_gene;TEA014493.1_gene;TEA014525.1_gene;TEA014520.1_gene;TEA014517.1_gene;TEA014516.1_gene;TEA014523.1_gene;TEA014498.1_gene
MSTRG.74185.2	TEA009809.1_gene;TEA009773.1_gene;TEA009813.1_gene
MSTRG.4392.1	TEA008953.1_gene;TEA008944.1_gene;TEA008937.1_gene
MSTRG.115250.1	TEA011492.1_gene
MSTRG.82473.21	TEA014276.1_gene
MSTRG.26807.1	TEA030871.1_gene;TEA030870.1_gene;TEA030868.1_gene
MSTRG.78686.1	TEA019003.1_gene;TEA019002.1_gene;TEA019015.1_gene;TEA019004.1_gene
MSTRG.98565.1	TEA014461.1_gene;TEA014445.1_gene;TEA014437.1_gene;TEA014436.1_gene;TEA014425.1_gene;TEA014441.1_gene;TEA014433.1_gene;TEA014444.1_gene
MSTRG.90143.1	TEA033694.1_gene
MSTRG.66261.1	TEA008021.1_gene;TEA008019.1_gene
MSTRG.135601.4	TEA014826.1_gene;TEA014817.1_gene;TEA014819.1_gene;TEA014812.1_gene
MSTRG.72786.3	TEA015486.1_gene;TEA015469.1_gene;TEA015470.1_gene;TEA015483.1_gene
MSTRG.134597.3	TEA027478.1_gene;TEA027488.1_gene;TEA027487.1_gene
MSTRG.95965.1	TEA004381.1_gene;TEA004379.1_gene;TEA004388.1_gene;TEA004385.1_gene
MSTRG.95973.11	TEA004392.1_gene;TEA004383.1_gene;TEA004385.1_gene;TEA004384.1_gene;TEA004379.1_gene
MSTRG.6134.1	TEA021952.1_gene;TEA021953.1_gene;TEA021950.1_gene;TEA021951.1_gene;TEA021964.1_gene;TEA021955.1_gene;TEA021967.1_gene;TEA021958.1_gene
MSTRG.138651.13	TEA022907.1_gene;TEA022917.1_gene;TEA022889.1_gene;TEA022882.1_gene;TEA022904.1_gene
MSTRG.2525.1	TEA024723.1_gene;TEA024712.1_gene;TEA024715.1_gene
MSTRG.63055.2	TEA030384.1_gene;TEA030423.1_gene
MSTRG.15868.1	TEA003478.1_gene;TEA003465.1_gene;TEA003472.1_gene;TEA003474.1_gene;TEA003470.1_gene
MSTRG.76516.1	TEA018539.1_gene
MSTRG.64202.3	TEA014091.1_gene;TEA014076.1_gene
MSTRG.87590.5	TEA028951.1_gene;TEA028950.1_gene;TEA028933.1_gene;TEA028932.1_gene;TEA028936.1_gene
MSTRG.90939.1	TEA005929.1_gene;TEA005918.1_gene;TEA005922.1_gene;TEA005886.1_gene;TEA005895.1_gene
MSTRG.135497.9	TEA014815.1_gene;TEA014805.1_gene;TEA014821.1_gene;TEA014828.1_gene;TEA014809.1_gene;TEA014820.1_gene
MSTRG.40866.3	TEA011776.1_gene;TEA011769.1_gene;TEA011765.1_gene
MSTRG.42800.1	TEA010075.1_gene;TEA010091.1_gene
MSTRG.107600.2	TEA015567.1_gene
MSTRG.100689.1	TEA002215.1_gene
MSTRG.36083.1	TEA031568.1_gene;TEA031570.1_gene
MSTRG.91455.1	TEA010760.1_gene;TEA010759.1_gene
MSTRG.10872.12	TEA031352.1_gene
MSTRG.147781.1	TEA030182.1_gene;TEA030186.1_gene;TEA030188.1_gene;TEA030204.1_gene
MSTRG.5135.2	TEA032213.1_gene;TEA032224.1_gene
MSTRG.65833.2	TEA018116.1_gene
MSTRG.131424.1	TEA015689.1_gene
MSTRG.1475.2	TEA022136.1_gene
MSTRG.41458.8	TEA008024.1_gene;TEA008023.1_gene
MSTRG.138909.2	TEA022337.1_gene;TEA022336.1_gene
MSTRG.85441.2	TEA017413.1_gene;TEA017414.1_gene;TEA017410.1_gene
MSTRG.61178.1	TEA002643.1_gene;TEA002670.1_gene;TEA002665.1_gene
MSTRG.137349.1	TEA014618.1_gene;TEA014617.1_gene;TEA014602.1_gene;TEA014636.1_gene;TEA014638.1_gene;TEA014627.1_gene;TEA014642.1_gene;TEA014635.1_gene
MSTRG.85441.1	TEA017413.1_gene;TEA017414.1_gene;TEA017410.1_gene
MSTRG.40233.2	TEA033560.1_gene
MSTRG.94073.2	TEA020278.1_gene;TEA020288.1_gene;TEA020287.1_gene
MSTRG.78852.1	TEA015738.1_gene;TEA015741.1_gene
MSTRG.38609.1	TEA033389.1_gene;TEA033387.1_gene
MSTRG.153179.1	TEA018288.1_gene;TEA018293.1_gene
MSTRG.135297.2	TEA010674.1_gene;TEA010669.1_gene;TEA010672.1_gene;TEA010664.1_gene;TEA010667.1_gene
MSTRG.67799.5	TEA001120.1_gene;TEA001127.1_gene;TEA001124.1_gene
MSTRG.138270.1	TEA008052.1_gene
MSTRG.23841.2	TEA033671.1_gene;TEA033674.1_gene;TEA033672.1_gene;TEA033673.1_gene;TEA033665.1_gene
MSTRG.29557.1	TEA014241.1_gene;TEA014235.1_gene;TEA014233.1_gene
MSTRG.155015.2	TEA019632.1_gene;TEA019597.1_gene;TEA019608.1_gene;TEA019602.1_gene;TEA019628.1_gene
MSTRG.108553.1	TEA010191.1_gene;TEA010192.1_gene;TEA010198.1_gene;TEA010190.1_gene;TEA010199.1_gene
MSTRG.136076.1	TEA008458.1_gene
MSTRG.154842.1	TEA031957.1_gene;TEA031967.1_gene;TEA031968.1_gene
MSTRG.87174.2	TEA026169.1_gene;TEA026168.1_gene
MSTRG.137378.1	TEA014635.1_gene;TEA014611.1_gene;TEA014645.1_gene;TEA014625.1_gene;TEA014606.1_gene;TEA014596.1_gene
MSTRG.137357.1	TEA014636.1_gene;TEA014606.1_gene;TEA014625.1_gene;TEA014617.1_gene;TEA014618.1_gene;TEA014635.1_gene;TEA014627.1_gene;TEA014645.1_gene
MSTRG.42238.7	TEA032451.1_gene;TEA032458.1_gene;TEA032471.1_gene;TEA032474.1_gene
MSTRG.142041.3	TEA029461.1_gene;TEA029460.1_gene;TEA029465.1_gene
MSTRG.47400.4	TEA026101.1_gene;TEA026090.1_gene;TEA026095.1_gene
MSTRG.62654.1	TEA013292.1_gene
MSTRG.72330.1	TEA011804.1_gene;TEA011789.1_gene
MSTRG.66886.7	TEA021261.1_gene
MSTRG.6370.1	TEA030095.1_gene;TEA030102.1_gene
MSTRG.7389.1	TEA025294.1_gene;TEA025284.1_gene;TEA025278.1_gene;TEA025293.1_gene
MSTRG.122714.1	TEA000630.1_gene;TEA000632.1_gene;TEA000627.1_gene;TEA000626.1_gene;TEA000628.1_gene
MSTRG.71287.2	TEA006294.1_gene;TEA006296.1_gene;TEA006316.1_gene;TEA006297.1_gene;TEA006315.1_gene
MSTRG.22635.2	TEA027691.1_gene;TEA027695.1_gene;TEA027681.1_gene;TEA027677.1_gene;TEA027682.1_gene;TEA027692.1_gene
MSTRG.24885.3	TEA002501.1_gene;TEA002499.1_gene;TEA002503.1_gene;TEA002506.1_gene;TEA002505.1_gene
MSTRG.104718.1	TEA033637.1_gene;TEA033636.1_gene
MSTRG.94549.1	TEA033806.1_gene
MSTRG.85226.1	TEA010392.1_gene;TEA010396.1_gene
MSTRG.12315.1	TEA024811.1_gene;TEA024812.1_gene
MSTRG.103677.2	TEA021224.1_gene;TEA021218.1_gene
MSTRG.38771.1	TEA004584.1_gene
MSTRG.31111.1	TEA027566.1_gene;TEA027569.1_gene;TEA027571.1_gene;TEA027582.1_gene;TEA027573.1_gene
MSTRG.152990.1	TEA004852.1_gene
MSTRG.33287.1	TEA005508.1_gene;TEA005504.1_gene;TEA005503.1_gene
MSTRG.66692.9	TEA019078.1_gene;TEA019088.1_gene
MSTRG.138872.1	TEA026003.1_gene
MSTRG.60223.1	TEA021610.1_gene
MSTRG.37957.7	TEA005137.1_gene;TEA005133.1_gene;TEA005126.1_gene;TEA005150.1_gene
MSTRG.65787.1	TEA018153.1_gene
MSTRG.146655.2	TEA029024.1_gene
MSTRG.3896.3	TEA005864.1_gene;TEA005830.1_gene;TEA005862.1_gene;TEA005859.1_gene;TEA005839.1_gene;TEA005842.1_gene;TEA005848.1_gene;TEA005836.1_gene;TEA005841.1_gene;TEA005844.1_gene
MSTRG.120284.7	TEA011068.1_gene
MSTRG.153611.1	TEA013362.1_gene;TEA013363.1_gene
MSTRG.93178.3	TEA015782.1_gene;TEA015777.1_gene;TEA015786.1_gene;TEA015773.1_gene
MSTRG.85374.2	TEA010399.1_gene;TEA010384.1_gene
MSTRG.80643.1	TEA019384.1_gene;TEA019373.1_gene;TEA019372.1_gene
MSTRG.92961.3	TEA022183.1_gene
MSTRG.65851.4	TEA018152.1_gene;TEA018101.1_gene;TEA018140.1_gene;TEA018112.1_gene;TEA018147.1_gene
MSTRG.85567.1	TEA023790.1_gene
MSTRG.71121.3	TEA013759.1_gene;TEA013748.1_gene;TEA013755.1_gene;TEA013758.1_gene;TEA013747.1_gene
MSTRG.138985.2	TEA029187.1_gene;TEA029186.1_gene
MSTRG.150730.1	TEA007960.1_gene;TEA007952.1_gene;TEA007958.1_gene
MSTRG.73098.1	TEA024154.1_gene;TEA024155.1_gene;TEA024151.1_gene
MSTRG.10936.7	TEA029120.1_gene;TEA029122.1_gene;TEA029123.1_gene
MSTRG.141266.2	TEA020389.1_gene;TEA020403.1_gene
MSTRG.28531.1	TEA012089.1_gene;TEA012092.1_gene;TEA012102.1_gene;TEA012098.1_gene;TEA012100.1_gene;TEA012097.1_gene;TEA012101.1_gene
MSTRG.136361.1	TEA020561.1_gene;TEA020562.1_gene;TEA020563.1_gene
MSTRG.50688.1	TEA001732.1_gene;TEA001724.1_gene;TEA001736.1_gene;TEA001705.1_gene;TEA001734.1_gene;TEA001735.1_gene
MSTRG.121737.1	TEA001585.1_gene
MSTRG.80999.1	TEA015171.1_gene;TEA015170.1_gene;TEA015169.1_gene
MSTRG.86569.1	TEA016460.1_gene;TEA016485.1_gene
MSTRG.54439.1	TEA001968.1_gene;TEA001971.1_gene
MSTRG.136208.1	TEA016033.1_gene
MSTRG.121472.5	TEA030983.1_gene;TEA030982.1_gene
MSTRG.48563.2	TEA021348.1_gene;TEA021351.1_gene;TEA021358.1_gene
MSTRG.67518.2	TEA029996.1_gene;TEA029992.1_gene;TEA029979.1_gene;TEA029972.1_gene;TEA029997.1_gene;TEA029999.1_gene
MSTRG.40122.1	TEA021569.1_gene
MSTRG.6563.1	TEA005445.1_gene
MSTRG.85845.1	TEA029763.1_gene
MSTRG.63066.1	TEA030392.1_gene;TEA030400.1_gene;TEA030436.1_gene;TEA030397.1_gene
MSTRG.107244.1	TEA015326.1_gene;TEA015311.1_gene;TEA015324.1_gene;TEA015317.1_gene
MSTRG.117922.3	TEA003109.1_gene;TEA003114.1_gene;TEA003113.1_gene;TEA003117.1_gene;TEA003107.1_gene
MSTRG.120283.21	TEA011068.1_gene
MSTRG.146800.10	TEA003926.1_gene;TEA003917.1_gene;TEA003915.1_gene
MSTRG.149769.1	TEA023947.1_gene;TEA023942.1_gene;TEA023958.1_gene;TEA023957.1_gene
MSTRG.31858.1	TEA003661.1_gene;TEA003663.1_gene
MSTRG.115479.1	TEA031346.1_gene;TEA031344.1_gene
MSTRG.81387.1	TEA006082.1_gene;TEA006095.1_gene;TEA006089.1_gene;TEA006087.1_gene;TEA006097.1_gene
MSTRG.116414.1	TEA033729.1_gene;TEA033713.1_gene;TEA033728.1_gene;TEA033712.1_gene;TEA033724.1_gene;TEA033726.1_gene;TEA033719.1_gene
MSTRG.124931.2	TEA023525.1_gene;TEA023538.1_gene;TEA023531.1_gene;TEA023532.1_gene
MSTRG.33119.2	TEA016559.1_gene;TEA016553.1_gene;TEA016539.1_gene
MSTRG.16186.4	TEA029713.1_gene
MSTRG.128449.1	TEA011863.1_gene;TEA011871.1_gene;TEA011855.1_gene;TEA011875.1_gene;TEA011862.1_gene
MSTRG.31767.1	TEA025780.1_gene
MSTRG.94186.1	TEA009400.1_gene;TEA009398.1_gene;TEA009389.1_gene;TEA009383.1_gene
MSTRG.30465.8	TEA019110.1_gene;TEA019120.1_gene;TEA019149.1_gene
MSTRG.144655.4	TEA027415.1_gene;TEA027357.1_gene
MSTRG.141555.1	TEA031134.1_gene;TEA031138.1_gene;TEA031135.1_gene;TEA031136.1_gene;TEA031137.1_gene
MSTRG.44128.2	TEA012919.1_gene;TEA012921.1_gene;TEA012917.1_gene;TEA012920.1_gene
MSTRG.39833.2	TEA000283.1_gene;TEA000285.1_gene;TEA000286.1_gene;TEA000284.1_gene
MSTRG.132677.1	TEA024935.1_gene
MSTRG.70868.1	TEA033354.1_gene;TEA033360.1_gene;TEA033362.1_gene
MSTRG.33659.1	TEA012711.1_gene;TEA012732.1_gene
MSTRG.117666.1	TEA007007.1_gene
MSTRG.49420.1	TEA007572.1_gene;TEA007569.1_gene;TEA007554.1_gene
MSTRG.140777.1	TEA011286.1_gene;TEA011293.1_gene;TEA011295.1_gene;TEA011287.1_gene
MSTRG.119498.3	TEA001493.1_gene;TEA001496.1_gene;TEA001509.1_gene;TEA001463.1_gene;TEA001458.1_gene;TEA001449.1_gene;TEA001475.1_gene
MSTRG.33366.2	TEA020068.1_gene;TEA020067.1_gene;TEA020060.1_gene;TEA020062.1_gene
MSTRG.1207.1	TEA011494.1_gene
MSTRG.93316.1	TEA005795.1_gene
MSTRG.84557.2	TEA025993.1_gene
MSTRG.69796.7	TEA008741.1_gene
MSTRG.83301.5	TEA021409.1_gene;TEA021408.1_gene;TEA021405.1_gene;TEA021406.1_gene;TEA021407.1_gene
MSTRG.90913.1	TEA005928.1_gene
MSTRG.81852.1	TEA004705.1_gene
MSTRG.12613.1	TEA001084.1_gene;TEA001078.1_gene;TEA001083.1_gene
MSTRG.12390.1	TEA025848.1_gene;TEA025853.1_gene;TEA025834.1_gene;TEA025844.1_gene;TEA025846.1_gene;TEA025845.1_gene;TEA025839.1_gene;TEA025833.1_gene
MSTRG.87747.1	TEA007411.1_gene
MSTRG.12071.4	TEA017153.1_gene;TEA017150.1_gene
MSTRG.51444.2	TEA021295.1_gene
MSTRG.145187.1	TEA020416.1_gene;TEA020419.1_gene
MSTRG.150730.21	TEA007958.1_gene;TEA007955.1_gene;TEA007952.1_gene;TEA007960.1_gene
MSTRG.37569.1	TEA004520.1_gene;TEA004502.1_gene;TEA004499.1_gene
MSTRG.58503.1	TEA030351.1_gene
MSTRG.71855.1	TEA028235.1_gene;TEA028236.1_gene
MSTRG.106755.1	TEA007706.1_gene
MSTRG.77405.1	TEA024285.1_gene;TEA024284.1_gene
MSTRG.62029.1	TEA009540.1_gene
MSTRG.121395.1	TEA030704.1_gene;TEA030701.1_gene;TEA030700.1_gene;TEA030698.1_gene;TEA030703.1_gene;TEA030702.1_gene;TEA030699.1_gene
MSTRG.14126.1	TEA001165.1_gene;TEA001196.1_gene
MSTRG.80955.3	TEA028533.1_gene
MSTRG.31328.7	TEA021830.1_gene;TEA021856.1_gene;TEA021823.1_gene;TEA021861.1_gene;TEA021864.1_gene;TEA021831.1_gene;TEA021865.1_gene;TEA021868.1_gene;TEA021835.1_gene;TEA021857.1_gene
MSTRG.129715.1	TEA024657.1_gene;TEA024633.1_gene;TEA024655.1_gene
MSTRG.140445.2	TEA012907.1_gene
MSTRG.62180.2	TEA009548.1_gene;TEA009553.1_gene;TEA009561.1_gene;TEA009560.1_gene;TEA009551.1_gene
MSTRG.40491.1	TEA016776.1_gene
MSTRG.94770.1	TEA031432.1_gene;TEA031435.1_gene;TEA031433.1_gene;TEA031428.1_gene;TEA031429.1_gene;TEA031410.1_gene
MSTRG.88979.5	TEA018228.1_gene
MSTRG.120284.2	TEA011068.1_gene
MSTRG.112013.1	TEA001338.1_gene;TEA001340.1_gene;TEA001337.1_gene;TEA001341.1_gene
MSTRG.2594.22	TEA029454.1_gene;TEA029441.1_gene;TEA029447.1_gene;TEA029450.1_gene
MSTRG.131488.1	TEA001287.1_gene;TEA001285.1_gene;TEA001294.1_gene;TEA001291.1_gene
MSTRG.55785.2	TEA009369.1_gene
MSTRG.27030.1	TEA006287.1_gene;TEA006288.1_gene;TEA006280.1_gene
MSTRG.134694.1	TEA027491.1_gene;TEA027498.1_gene;TEA027468.1_gene;TEA027494.1_gene;TEA027493.1_gene;TEA027497.1_gene;TEA027489.1_gene
MSTRG.96333.1	TEA030786.1_gene;TEA030806.1_gene;TEA030780.1_gene;TEA030828.1_gene
MSTRG.15016.1	TEA030026.1_gene
MSTRG.26500.1	TEA008673.1_gene;TEA008670.1_gene
MSTRG.82473.3	TEA014276.1_gene
MSTRG.35897.1	TEA009162.1_gene;TEA009169.1_gene
MSTRG.6455.9	TEA028644.1_gene;TEA028645.1_gene
MSTRG.28434.2	TEA021528.1_gene;TEA021533.1_gene;TEA021527.1_gene;TEA021539.1_gene;TEA021541.1_gene
MSTRG.99004.1	TEA016222.1_gene;TEA016172.1_gene;TEA016205.1_gene
MSTRG.32190.1	TEA030953.1_gene;TEA030955.1_gene
MSTRG.12043.1	TEA017148.1_gene;TEA017155.1_gene;TEA017151.1_gene;TEA017152.1_gene;TEA017153.1_gene
MSTRG.87624.2	TEA028941.1_gene;TEA028939.1_gene;TEA028944.1_gene;TEA028937.1_gene;TEA028949.1_gene;TEA028952.1_gene;TEA028946.1_gene
MSTRG.51743.1	TEA021064.1_gene;TEA021099.1_gene
MSTRG.41012.14	TEA003073.1_gene
MSTRG.106232.1	TEA033143.1_gene
MSTRG.17857.2	TEA015373.1_gene
MSTRG.120747.1	TEA028661.1_gene
MSTRG.63898.3	TEA010712.1_gene;TEA010716.1_gene
MSTRG.101330.2	TEA008858.1_gene;TEA008855.1_gene;TEA008861.1_gene;TEA008859.1_gene
MSTRG.39950.1	TEA006511.1_gene;TEA006523.1_gene;TEA006542.1_gene
MSTRG.47271.3	TEA015631.1_gene;TEA015624.1_gene;TEA015613.1_gene;TEA015630.1_gene
MSTRG.3069.1	TEA029083.1_gene;TEA029086.1_gene;TEA029079.1_gene;TEA029082.1_gene;TEA029089.1_gene
MSTRG.123539.7	TEA009947.1_gene;TEA009954.1_gene;TEA009951.1_gene;TEA009952.1_gene;TEA009948.1_gene;TEA009953.1_gene;TEA009955.1_gene;TEA009956.1_gene
MSTRG.48868.2	TEA018836.1_gene;TEA018851.1_gene;TEA018842.1_gene;TEA018839.1_gene;TEA018849.1_gene
MSTRG.3508.1	TEA001376.1_gene;TEA001377.1_gene;TEA001369.1_gene
MSTRG.122920.1	TEA033741.1_gene;TEA033760.1_gene;TEA033744.1_gene;TEA033765.1_gene;TEA033757.1_gene
MSTRG.104811.1	TEA007892.1_gene;TEA007895.1_gene
MSTRG.100032.1	TEA011335.1_gene;TEA011358.1_gene;TEA011346.1_gene;TEA011353.1_gene;TEA011360.1_gene
MSTRG.2133.1	TEA029043.1_gene
MSTRG.80057.1	TEA019906.1_gene;TEA019908.1_gene;TEA019924.1_gene;TEA019898.1_gene;TEA019910.1_gene
MSTRG.23179.2	TEA030719.1_gene;TEA030725.1_gene;TEA030723.1_gene
MSTRG.52365.1	TEA022684.1_gene;TEA022686.1_gene;TEA022693.1_gene;TEA022694.1_gene;TEA022703.1_gene;TEA022705.1_gene;TEA022689.1_gene
MSTRG.143568.1	TEA019704.1_gene
MSTRG.126316.1	TEA001755.1_gene;TEA001748.1_gene
MSTRG.61722.1	TEA001671.1_gene;TEA001619.1_gene;TEA001654.1_gene
MSTRG.15735.1	TEA013571.1_gene;TEA013569.1_gene
MSTRG.55413.1	TEA001401.1_gene;TEA001393.1_gene;TEA001386.1_gene;TEA001398.1_gene
MSTRG.41404.3	TEA010887.1_gene;TEA010896.1_gene;TEA010906.1_gene;TEA010910.1_gene
MSTRG.53709.1	TEA027857.1_gene;TEA027860.1_gene;TEA027865.1_gene;TEA027850.1_gene
MSTRG.87746.2	TEA007411.1_gene
MSTRG.98723.9	TEA004068.1_gene
MSTRG.120643.3	TEA031636.1_gene;TEA031645.1_gene;TEA031646.1_gene;TEA031661.1_gene;TEA031633.1_gene;TEA031663.1_gene
MSTRG.56544.1	TEA009226.1_gene
MSTRG.153569.1	TEA009524.1_gene
MSTRG.79730.4	TEA003826.1_gene;TEA003831.1_gene
MSTRG.39385.1	TEA013111.1_gene;TEA013113.1_gene;TEA013108.1_gene;TEA013118.1_gene;TEA013110.1_gene;TEA013117.1_gene;TEA013107.1_gene
MSTRG.51395.1	TEA021312.1_gene
MSTRG.88837.2	TEA025084.1_gene
MSTRG.107227.2	TEA015314.1_gene;TEA015320.1_gene;TEA015315.1_gene;TEA015313.1_gene
MSTRG.86392.5	TEA015515.1_gene;TEA015514.1_gene;TEA015520.1_gene
MSTRG.41117.1	TEA011031.1_gene
MSTRG.41162.1	TEA023031.1_gene;TEA023038.1_gene
MSTRG.127682.1	TEA008541.1_gene
MSTRG.2010.3	TEA016707.1_gene;TEA016705.1_gene
MSTRG.135081.2	TEA007912.1_gene
MSTRG.16668.2	TEA018887.1_gene;TEA018882.1_gene;TEA018883.1_gene;TEA018888.1_gene;TEA018886.1_gene;TEA018885.1_gene
MSTRG.68615.8	TEA024346.1_gene;TEA024344.1_gene
MSTRG.64546.2	TEA000722.1_gene;TEA000720.1_gene
MSTRG.114730.1	TEA010455.1_gene;TEA010454.1_gene
MSTRG.72032.1	TEA017460.1_gene;TEA017451.1_gene
MSTRG.92358.1	TEA011732.1_gene;TEA011728.1_gene;TEA011731.1_gene;TEA011734.1_gene;TEA011741.1_gene
MSTRG.37761.1	TEA030119.1_gene;TEA030125.1_gene;TEA030111.1_gene;TEA030116.1_gene;TEA030123.1_gene
MSTRG.16471.1	TEA007363.1_gene;TEA007369.1_gene;TEA007356.1_gene;TEA007364.1_gene;TEA007372.1_gene;TEA007361.1_gene;TEA007358.1_gene;TEA007362.1_gene;TEA007370.1_gene;TEA007367.1_gene;TEA007365.1_gene
MSTRG.30530.1	TEA019126.1_gene;TEA019122.1_gene;TEA019163.1_gene;TEA019154.1_gene
MSTRG.94251.1	TEA024180.1_gene;TEA024178.1_gene;TEA024181.1_gene
MSTRG.113487.1	TEA014391.1_gene;TEA014393.1_gene;TEA014389.1_gene
MSTRG.153344.1	TEA012771.1_gene;TEA012774.1_gene
MSTRG.7546.2	TEA005694.1_gene;TEA005691.1_gene
MSTRG.37905.6	TEA005110.1_gene;TEA005132.1_gene;TEA005144.1_gene;TEA005139.1_gene;TEA005151.1_gene
MSTRG.124046.2	TEA013893.1_gene;TEA013891.1_gene;TEA013919.1_gene
MSTRG.98285.1	TEA007023.1_gene;TEA007011.1_gene;TEA007017.1_gene
MSTRG.52404.2	TEA022697.1_gene
MSTRG.149985.3	TEA002921.1_gene;TEA002928.1_gene
MSTRG.95846.1	TEA000904.1_gene;TEA000918.1_gene;TEA000936.1_gene;TEA000903.1_gene;TEA000906.1_gene
MSTRG.36617.2	TEA029145.1_gene;TEA029140.1_gene
MSTRG.13347.3	TEA008882.1_gene;TEA008880.1_gene
MSTRG.5595.2	TEA020317.1_gene;TEA020316.1_gene
MSTRG.130658.1	TEA029868.1_gene;TEA029863.1_gene;TEA029873.1_gene;TEA029870.1_gene;TEA029841.1_gene
MSTRG.70117.5	TEA017481.1_gene;TEA017476.1_gene;TEA017475.1_gene
MSTRG.45267.2	TEA011033.1_gene;TEA011045.1_gene;TEA011040.1_gene
MSTRG.83839.7	TEA008812.1_gene;TEA008814.1_gene;TEA008809.1_gene
MSTRG.136043.9	TEA017560.1_gene;TEA017564.1_gene
MSTRG.84066.12	TEA013260.1_gene;TEA013253.1_gene
MSTRG.152248.5	TEA010648.1_gene;TEA010658.1_gene;TEA010637.1_gene;TEA010645.1_gene;TEA010656.1_gene
MSTRG.134341.8	TEA024763.1_gene;TEA024765.1_gene;TEA024760.1_gene;TEA024761.1_gene;TEA024762.1_gene;TEA024759.1_gene;TEA024758.1_gene;TEA024764.1_gene
MSTRG.83993.1	TEA003741.1_gene
MSTRG.26677.1	TEA024894.1_gene
MSTRG.83204.1	TEA011994.1_gene;TEA011992.1_gene;TEA011999.1_gene;TEA011997.1_gene
MSTRG.70896.7	TEA029772.1_gene;TEA029777.1_gene;TEA029778.1_gene;TEA029774.1_gene;TEA029773.1_gene
MSTRG.147645.1	TEA018811.1_gene;TEA018790.1_gene;TEA018799.1_gene;TEA018804.1_gene
MSTRG.133.1	TEA014519.1_gene
MSTRG.19234.2	TEA010734.1_gene;TEA010725.1_gene;TEA010723.1_gene;TEA010730.1_gene
MSTRG.123587.1	TEA033307.1_gene;TEA033308.1_gene;TEA033310.1_gene;TEA033312.1_gene;TEA033316.1_gene
MSTRG.153496.1	TEA004950.1_gene;TEA004949.1_gene
MSTRG.72864.5	TEA015990.1_gene;TEA015987.1_gene;TEA015986.1_gene
MSTRG.34061.1	TEA007579.1_gene;TEA007584.1_gene;TEA007609.1_gene;TEA007633.1_gene;TEA007614.1_gene;TEA007623.1_gene
MSTRG.53787.1	TEA016506.1_gene;TEA016501.1_gene
MSTRG.124183.1	TEA020250.1_gene;TEA020241.1_gene;TEA020235.1_gene;TEA020255.1_gene;TEA020254.1_gene;TEA020239.1_gene;TEA020256.1_gene
MSTRG.4405.11	TEA008966.1_gene
MSTRG.55227.1	TEA027724.1_gene;TEA027723.1_gene;TEA027721.1_gene
MSTRG.43430.1	TEA026430.1_gene;TEA026443.1_gene
MSTRG.78481.1	TEA016696.1_gene
MSTRG.46310.1	TEA020908.1_gene;TEA020905.1_gene;TEA020895.1_gene;TEA020872.1_gene
MSTRG.113644.1	TEA013626.1_gene;TEA013623.1_gene
MSTRG.74525.1	TEA011817.1_gene;TEA011822.1_gene;TEA011819.1_gene;TEA011812.1_gene
MSTRG.120284.23	TEA011068.1_gene
MSTRG.154736.1	TEA022868.1_gene;TEA022865.1_gene;TEA022830.1_gene;TEA022847.1_gene;TEA022832.1_gene
MSTRG.107712.1	TEA006620.1_gene;TEA006623.1_gene
MSTRG.69207.1	TEA004175.1_gene;TEA004176.1_gene;TEA004169.1_gene
MSTRG.151891.1	TEA013656.1_gene;TEA013677.1_gene;TEA013670.1_gene;TEA013671.1_gene
MSTRG.105701.1	TEA012509.1_gene;TEA012506.1_gene;TEA012507.1_gene
MSTRG.48551.1	TEA021357.1_gene
MSTRG.33143.2	TEA016520.1_gene;TEA016550.1_gene;TEA016529.1_gene;TEA016565.1_gene
MSTRG.61782.1	TEA001642.1_gene
MSTRG.128440.7	TEA011862.1_gene;TEA011863.1_gene
MSTRG.149312.7	TEA027810.1_gene;TEA027814.1_gene;TEA027812.1_gene;TEA027820.1_gene
MSTRG.149236.1	TEA016992.1_gene;TEA016998.1_gene
MSTRG.116307.1	TEA004889.1_gene;TEA004898.1_gene
MSTRG.95459.1	TEA031803.1_gene;TEA031822.1_gene;TEA031820.1_gene;TEA031813.1_gene;TEA031815.1_gene;TEA031814.1_gene
MSTRG.81213.2	TEA017357.1_gene
MSTRG.79064.1	TEA011030.1_gene
MSTRG.81747.1	TEA005669.1_gene;TEA005676.1_gene;TEA005678.1_gene
MSTRG.6465.1	TEA028657.1_gene;TEA028652.1_gene;TEA028645.1_gene;TEA028651.1_gene;TEA028644.1_gene
MSTRG.72913.1	TEA008726.1_gene;TEA008724.1_gene;TEA008733.1_gene
MSTRG.101071.1	TEA024572.1_gene;TEA024588.1_gene;TEA024591.1_gene
MSTRG.81449.2	TEA023901.1_gene;TEA023900.1_gene
MSTRG.83730.1	TEA023735.1_gene
MSTRG.20346.1	TEA007978.1_gene;TEA007973.1_gene
MSTRG.107075.1	TEA015639.1_gene
MSTRG.140252.3	TEA002633.1_gene;TEA002625.1_gene;TEA002640.1_gene
MSTRG.39635.1	TEA001833.1_gene;TEA001841.1_gene
MSTRG.100287.1	TEA009018.1_gene;TEA009015.1_gene
MSTRG.95475.1	TEA031815.1_gene;TEA031821.1_gene;TEA031809.1_gene;TEA031817.1_gene;TEA031822.1_gene;TEA031803.1_gene
MSTRG.102449.1	TEA009195.1_gene;TEA009204.1_gene;TEA009198.1_gene;TEA009197.1_gene;TEA009203.1_gene
MSTRG.92126.1	TEA012348.1_gene;TEA012346.1_gene;TEA012338.1_gene;TEA012350.1_gene
MSTRG.131575.2	TEA006651.1_gene;TEA006670.1_gene;TEA006649.1_gene
MSTRG.60520.1	TEA031860.1_gene
MSTRG.1402.1	TEA027293.1_gene;TEA027289.1_gene
MSTRG.153933.1	TEA006935.1_gene;TEA006936.1_gene
MSTRG.5515.1	TEA020202.1_gene;TEA020177.1_gene;TEA020187.1_gene;TEA020191.1_gene;TEA020175.1_gene;TEA020194.1_gene;TEA020180.1_gene
MSTRG.73833.1	TEA006964.1_gene;TEA006953.1_gene;TEA006960.1_gene
MSTRG.82474.5	TEA014276.1_gene
MSTRG.120283.26	TEA011068.1_gene
MSTRG.105950.1	TEA004130.1_gene;TEA004128.1_gene;TEA004132.1_gene;TEA004133.1_gene;TEA004123.1_gene
MSTRG.27264.3	TEA001334.1_gene
MSTRG.137259.6	TEA015873.1_gene
MSTRG.65098.9	TEA004216.1_gene;TEA004215.1_gene;TEA004207.1_gene
MSTRG.140184.2	TEA002269.1_gene;TEA002265.1_gene
MSTRG.153455.3	TEA004958.1_gene;TEA004948.1_gene;TEA004947.1_gene
MSTRG.6837.5	TEA028748.1_gene;TEA028739.1_gene;TEA028740.1_gene;TEA028745.1_gene
MSTRG.49899.1	TEA026719.1_gene;TEA026729.1_gene;TEA026723.1_gene;TEA026726.1_gene;TEA026721.1_gene
MSTRG.41458.4	TEA008023.1_gene;TEA008024.1_gene
MSTRG.151311.10	TEA031512.1_gene;TEA031504.1_gene;TEA031513.1_gene;TEA031520.1_gene;TEA031521.1_gene
MSTRG.48796.1	TEA006613.1_gene;TEA006606.1_gene;TEA006604.1_gene;TEA006611.1_gene;TEA006612.1_gene;TEA006614.1_gene;TEA006618.1_gene;TEA006603.1_gene
MSTRG.66761.1	TEA020690.1_gene;TEA020706.1_gene;TEA020687.1_gene;TEA020693.1_gene;TEA020697.1_gene;TEA020685.1_gene
MSTRG.117129.1	TEA030341.1_gene;TEA030342.1_gene
MSTRG.84091.2	TEA013235.1_gene;TEA013266.1_gene;TEA013265.1_gene
MSTRG.72989.1	TEA031458.1_gene;TEA031464.1_gene;TEA031460.1_gene
MSTRG.73136.1	TEA014294.1_gene
MSTRG.86198.4	TEA027192.1_gene
MSTRG.1477.3	TEA001071.1_gene;TEA001070.1_gene
MSTRG.100085.7	TEA013341.1_gene
MSTRG.144572.1	TEA027364.1_gene;TEA027377.1_gene;TEA027348.1_gene;TEA027350.1_gene;TEA027361.1_gene
MSTRG.122097.2	TEA014792.1_gene;TEA014794.1_gene;TEA014793.1_gene
MSTRG.101545.1	TEA011959.1_gene;TEA011958.1_gene
MSTRG.144656.1	TEA027357.1_gene;TEA027415.1_gene
MSTRG.129482.2	TEA019339.1_gene;TEA019342.1_gene
MSTRG.27645.5	TEA013952.1_gene;TEA013957.1_gene;TEA013973.1_gene;TEA013932.1_gene;TEA013941.1_gene
MSTRG.33958.6	TEA007602.1_gene;TEA007593.1_gene
MSTRG.117357.1	TEA020830.1_gene;TEA020829.1_gene;TEA020824.1_gene;TEA020818.1_gene
MSTRG.145316.20	TEA023221.1_gene;TEA023219.1_gene
MSTRG.154187.3	TEA001366.1_gene
MSTRG.14957.1	TEA030008.1_gene;TEA030022.1_gene
MSTRG.68107.2	TEA018319.1_gene;TEA018320.1_gene
MSTRG.54708.1	TEA013319.1_gene;TEA013320.1_gene
MSTRG.53265.5	TEA019295.1_gene;TEA019291.1_gene;TEA019277.1_gene
MSTRG.147768.1	TEA030181.1_gene
MSTRG.149768.1	TEA023957.1_gene;TEA023958.1_gene;TEA023942.1_gene;TEA023947.1_gene
MSTRG.141850.1	TEA033026.1_gene;TEA033020.1_gene
MSTRG.148397.1	TEA007849.1_gene;TEA007858.1_gene
MSTRG.112640.1	TEA024947.1_gene;TEA024972.1_gene;TEA024971.1_gene
MSTRG.54771.3	TEA022075.1_gene;TEA022071.1_gene;TEA022069.1_gene;TEA022067.1_gene;TEA022077.1_gene;TEA022068.1_gene;TEA022070.1_gene;TEA022078.1_gene;TEA022063.1_gene
MSTRG.23253.1	TEA030706.1_gene
MSTRG.85245.2	TEA010392.1_gene
MSTRG.151090.2	TEA017397.1_gene
MSTRG.41425.1	TEA010888.1_gene;TEA010914.1_gene
MSTRG.115734.1	TEA006847.1_gene;TEA006820.1_gene;TEA006836.1_gene;TEA006832.1_gene
MSTRG.85659.1	TEA023791.1_gene
MSTRG.66818.1	TEA020704.1_gene
MSTRG.44241.3	TEA006435.1_gene;TEA006443.1_gene;TEA006426.1_gene;TEA006424.1_gene
MSTRG.14123.8	TEA001165.1_gene
MSTRG.50353.1	TEA002846.1_gene;TEA002851.1_gene;TEA002853.1_gene
MSTRG.62179.3	TEA009560.1_gene;TEA009551.1_gene;TEA009561.1_gene;TEA009553.1_gene;TEA009548.1_gene
MSTRG.68779.4	TEA026041.1_gene;TEA026057.1_gene;TEA026035.1_gene
MSTRG.33804.1	TEA012719.1_gene;TEA012729.1_gene
MSTRG.82958.1	TEA026764.1_gene;TEA026760.1_gene
MSTRG.12546.1	TEA031931.1_gene;TEA031930.1_gene;TEA031933.1_gene;TEA031929.1_gene
MSTRG.42216.2	TEA032458.1_gene;TEA032461.1_gene;TEA032469.1_gene;TEA032460.1_gene;TEA032471.1_gene
MSTRG.26361.1	TEA032902.1_gene;TEA032896.1_gene;TEA032914.1_gene;TEA032922.1_gene
MSTRG.101905.1	TEA022756.1_gene
MSTRG.150263.1	TEA032987.1_gene;TEA032996.1_gene
MSTRG.10788.7	TEA000567.1_gene;TEA000571.1_gene;TEA000568.1_gene
MSTRG.96895.5	TEA013176.1_gene;TEA013170.1_gene;TEA013167.1_gene
MSTRG.99802.2	TEA006389.1_gene
MSTRG.1412.1	TEA027293.1_gene;TEA027291.1_gene
MSTRG.10788.4	TEA000568.1_gene;TEA000571.1_gene;TEA000567.1_gene
MSTRG.97814.2	TEA026691.1_gene;TEA026697.1_gene;TEA026701.1_gene;TEA026698.1_gene;TEA026694.1_gene;TEA026692.1_gene;TEA026696.1_gene
MSTRG.134637.1	TEA027501.1_gene;TEA027476.1_gene;TEA027471.1_gene;TEA027472.1_gene
MSTRG.48031.1	TEA015536.1_gene
MSTRG.46098.1	TEA033374.1_gene;TEA033371.1_gene;TEA033372.1_gene
MSTRG.125154.1	TEA031034.1_gene
MSTRG.102377.4	TEA013763.1_gene;TEA013774.1_gene;TEA013786.1_gene;TEA013818.1_gene;TEA013803.1_gene;TEA013807.1_gene;TEA013779.1_gene
MSTRG.96895.2	TEA013176.1_gene;TEA013167.1_gene;TEA013170.1_gene
MSTRG.127580.1	TEA008509.1_gene;TEA008505.1_gene;TEA008527.1_gene
MSTRG.106679.2	TEA016123.1_gene
MSTRG.96896.1	TEA013170.1_gene;TEA013167.1_gene;TEA013178.1_gene
MSTRG.72085.1	TEA017455.1_gene;TEA017452.1_gene;TEA017457.1_gene
MSTRG.97501.1	TEA003309.1_gene;TEA003320.1_gene;TEA003307.1_gene;TEA003302.1_gene
MSTRG.141266.1	TEA020403.1_gene;TEA020389.1_gene
MSTRG.21060.1	TEA024035.1_gene;TEA024037.1_gene;TEA024057.1_gene;TEA024052.1_gene;TEA024043.1_gene;TEA024023.1_gene;TEA024038.1_gene;TEA024041.1_gene
MSTRG.42743.1	TEA010065.1_gene;TEA010094.1_gene;TEA010087.1_gene;TEA010076.1_gene;TEA010078.1_gene
MSTRG.56704.1	TEA029236.1_gene;TEA029223.1_gene;TEA029224.1_gene
MSTRG.94968.5	TEA029495.1_gene;TEA029500.1_gene;TEA029524.1_gene;TEA029514.1_gene
MSTRG.17522.1	TEA006500.1_gene;TEA006487.1_gene;TEA006493.1_gene
MSTRG.146573.12	TEA002310.1_gene;TEA002318.1_gene
MSTRG.79099.1	TEA006459.1_gene;TEA006450.1_gene;TEA006455.1_gene;TEA006451.1_gene;TEA006465.1_gene;TEA006446.1_gene;TEA006460.1_gene;TEA006445.1_gene
MSTRG.99353.2	TEA016169.1_gene;TEA016168.1_gene
MSTRG.149269.1	TEA027818.1_gene;TEA027819.1_gene;TEA027808.1_gene;TEA027805.1_gene
MSTRG.17264.1	TEA004240.1_gene
MSTRG.90106.1	TEA033706.1_gene;TEA033705.1_gene;TEA033701.1_gene;TEA033695.1_gene
MSTRG.2747.1	TEA004046.1_gene;TEA004053.1_gene;TEA004045.1_gene;TEA004059.1_gene;TEA004054.1_gene;TEA004058.1_gene
MSTRG.47722.1	TEA028595.1_gene;TEA028599.1_gene;TEA028612.1_gene;TEA028606.1_gene;TEA028603.1_gene
MSTRG.51912.1	TEA021084.1_gene
MSTRG.93778.45	TEA021814.1_gene
MSTRG.7455.10	TEA024692.1_gene
MSTRG.27790.8	TEA006337.1_gene;TEA006333.1_gene;TEA006335.1_gene;TEA006330.1_gene;TEA006336.1_gene
MSTRG.26954.1	TEA029786.1_gene;TEA029791.1_gene;TEA029787.1_gene
MSTRG.21811.7	TEA016868.1_gene;TEA016866.1_gene
MSTRG.139616.4	TEA000772.1_gene;TEA000768.1_gene
MSTRG.143130.8	TEA000608.1_gene;TEA000610.1_gene;TEA000615.1_gene;TEA000620.1_gene;TEA000614.1_gene
MSTRG.4038.1	TEA029704.1_gene
MSTRG.49884.1	TEA026725.1_gene;TEA026727.1_gene
MSTRG.119942.2	TEA012466.1_gene;TEA012467.1_gene
MSTRG.62181.1	TEA009553.1_gene;TEA009561.1_gene;TEA009548.1_gene;TEA009560.1_gene;TEA009551.1_gene
MSTRG.10604.1	TEA023278.1_gene;TEA023276.1_gene;TEA023260.1_gene;TEA023263.1_gene
MSTRG.70568.1	TEA025769.1_gene;TEA025755.1_gene;TEA025760.1_gene;TEA025776.1_gene;TEA025764.1_gene;TEA025765.1_gene;TEA025756.1_gene
MSTRG.151100.1	TEA017383.1_gene;TEA017380.1_gene
MSTRG.56581.3	TEA030865.1_gene;TEA030860.1_gene
MSTRG.121525.39	TEA009265.1_gene
MSTRG.101049.1	TEA024574.1_gene;TEA024568.1_gene;TEA024575.1_gene
MSTRG.121472.22	TEA030982.1_gene;TEA030983.1_gene
MSTRG.24228.2	TEA032110.1_gene;TEA032114.1_gene;TEA032102.1_gene
MSTRG.16847.3	TEA026978.1_gene;TEA026969.1_gene
MSTRG.3488.3	TEA001371.1_gene;TEA001375.1_gene
MSTRG.75279.7	TEA016387.1_gene;TEA016400.1_gene;TEA016401.1_gene
MSTRG.133416.1	TEA004597.1_gene;TEA004596.1_gene;TEA004599.1_gene;TEA004594.1_gene;TEA004592.1_gene
MSTRG.148153.1	TEA027951.1_gene;TEA027946.1_gene;TEA027939.1_gene;TEA027947.1_gene
MSTRG.23479.1	TEA007997.1_gene;TEA007996.1_gene;TEA007990.1_gene;TEA007988.1_gene
MSTRG.143783.5	TEA008352.1_gene;TEA008354.1_gene;TEA008355.1_gene;TEA008350.1_gene
MSTRG.85227.2	TEA010396.1_gene;TEA010392.1_gene
MSTRG.24456.1	TEA032002.1_gene
MSTRG.69195.1	TEA004169.1_gene;TEA004171.1_gene;TEA004175.1_gene
MSTRG.74849.1	TEA022127.1_gene
MSTRG.102209.2	TEA013784.1_gene;TEA013815.1_gene;TEA013799.1_gene;TEA013787.1_gene;TEA013811.1_gene
MSTRG.91501.1	TEA017802.1_gene
MSTRG.94418.1	TEA014311.1_gene;TEA014310.1_gene;TEA014309.1_gene;TEA014308.1_gene
MSTRG.6966.1	TEA028750.1_gene;TEA028752.1_gene;TEA028724.1_gene
MSTRG.18222.1	TEA029684.1_gene;TEA029687.1_gene;TEA029686.1_gene;TEA029685.1_gene
MSTRG.34422.4	TEA009478.1_gene
MSTRG.39499.2	TEA010776.1_gene;TEA010774.1_gene
MSTRG.75789.16	TEA007066.1_gene;TEA007068.1_gene
MSTRG.18078.1	TEA004497.1_gene;TEA004496.1_gene
MSTRG.20691.1	TEA020809.1_gene
MSTRG.61858.2	TEA001598.1_gene;TEA001667.1_gene;TEA001650.1_gene;TEA001640.1_gene;TEA001606.1_gene
MSTRG.29775.1	TEA025827.1_gene
MSTRG.41842.1	TEA016601.1_gene
MSTRG.69526.3	TEA018424.1_gene;TEA018441.1_gene;TEA018437.1_gene;TEA018445.1_gene;TEA018429.1_gene
MSTRG.85893.1	TEA010798.1_gene;TEA010815.1_gene
MSTRG.25186.1	TEA010987.1_gene;TEA010998.1_gene;TEA010989.1_gene;TEA010985.1_gene;TEA010994.1_gene
MSTRG.110171.1	TEA021292.1_gene;TEA021279.1_gene
MSTRG.20787.5	TEA009635.1_gene;TEA009657.1_gene;TEA009649.1_gene;TEA009638.1_gene;TEA009654.1_gene;TEA009659.1_gene
MSTRG.14244.3	TEA009601.1_gene
MSTRG.7056.1	TEA004063.1_gene
MSTRG.123490.1	TEA025665.1_gene;TEA025667.1_gene
MSTRG.45380.1	TEA006998.1_gene;TEA006991.1_gene;TEA006975.1_gene;TEA006985.1_gene;TEA006984.1_gene;TEA006996.1_gene;TEA006994.1_gene
MSTRG.121526.8	TEA009265.1_gene
MSTRG.2213.11	TEA005594.1_gene;TEA005595.1_gene;TEA005593.1_gene;TEA005601.1_gene
MSTRG.25323.1	TEA028957.1_gene;TEA028979.1_gene
MSTRG.76927.2	TEA018304.1_gene
MSTRG.155406.1	TEA020655.1_gene;TEA020656.1_gene
MSTRG.11807.2	TEA003521.1_gene;TEA003518.1_gene;TEA003519.1_gene
MSTRG.41323.1	TEA010902.1_gene;TEA010907.1_gene;TEA010892.1_gene;TEA010911.1_gene
MSTRG.62146.3	TEA004106.1_gene;TEA004107.1_gene;TEA004105.1_gene
MSTRG.297.1	TEA017843.1_gene;TEA017853.1_gene;TEA017849.1_gene;TEA017845.1_gene;TEA017848.1_gene
MSTRG.69979.1	TEA027870.1_gene;TEA027877.1_gene;TEA027878.1_gene;TEA027869.1_gene;TEA027873.1_gene;TEA027876.1_gene
MSTRG.52699.1	TEA027069.1_gene
MSTRG.63087.1	TEA030415.1_gene;TEA030413.1_gene;TEA030429.1_gene;TEA030419.1_gene;TEA030420.1_gene;TEA030408.1_gene;TEA030412.1_gene;TEA030403.1_gene;TEA030438.1_gene
MSTRG.9406.9	TEA011233.1_gene;TEA011221.1_gene;TEA011238.1_gene;TEA011243.1_gene
MSTRG.29505.2	TEA020724.1_gene
MSTRG.70273.3	TEA011936.1_gene;TEA011941.1_gene;TEA011912.1_gene;TEA011945.1_gene
MSTRG.154262.1	TEA008093.1_gene
MSTRG.619.3	TEA004484.1_gene;TEA004489.1_gene
MSTRG.45054.1	TEA023122.1_gene;TEA023131.1_gene;TEA023125.1_gene
MSTRG.65970.1	TEA019503.1_gene;TEA019499.1_gene;TEA019498.1_gene;TEA019494.1_gene
MSTRG.18720.1	TEA030889.1_gene;TEA030881.1_gene;TEA030894.1_gene
MSTRG.147696.2	TEA020663.1_gene
MSTRG.56609.1	TEA030861.1_gene;TEA030864.1_gene
MSTRG.69734.1	TEA017650.1_gene;TEA017647.1_gene;TEA017655.1_gene;TEA017649.1_gene
MSTRG.124814.1	TEA021896.1_gene;TEA021895.1_gene
MSTRG.134321.1	TEA014585.1_gene;TEA014589.1_gene;TEA014584.1_gene;TEA014586.1_gene;TEA014588.1_gene
MSTRG.152529.1	TEA028559.1_gene
MSTRG.7104.1	TEA011586.1_gene;TEA011592.1_gene;TEA011590.1_gene;TEA011591.1_gene;TEA011593.1_gene;TEA011594.1_gene;TEA011588.1_gene;TEA011587.1_gene
MSTRG.102358.1	TEA013785.1_gene;TEA013808.1_gene;TEA013764.1_gene;TEA013793.1_gene
MSTRG.149522.1	TEA008744.1_gene
MSTRG.51258.1	TEA016619.1_gene;TEA016631.1_gene
MSTRG.88627.1	TEA021652.1_gene;TEA021640.1_gene
MSTRG.131815.1	TEA029359.1_gene;TEA029358.1_gene;TEA029360.1_gene
MSTRG.27240.1	TEA001333.1_gene
MSTRG.136467.3	TEA012593.1_gene;TEA012587.1_gene
MSTRG.6922.1	TEA028732.1_gene;TEA028751.1_gene
MSTRG.117274.1	TEA011529.1_gene;TEA011530.1_gene
MSTRG.137603.2	TEA023325.1_gene;TEA023310.1_gene;TEA023312.1_gene;TEA023318.1_gene;TEA023328.1_gene
MSTRG.34906.6	TEA009684.1_gene;TEA009677.1_gene;TEA009683.1_gene
MSTRG.55895.2	TEA009373.1_gene;TEA009375.1_gene
MSTRG.155538.1	TEA028763.1_gene;TEA028765.1_gene
MSTRG.99318.2	TEA007466.1_gene
MSTRG.114483.1	TEA014169.1_gene;TEA014177.1_gene;TEA014180.1_gene;TEA014175.1_gene;TEA014171.1_gene
MSTRG.46463.3	TEA017894.1_gene;TEA017893.1_gene;TEA017896.1_gene
MSTRG.130907.1	TEA010020.1_gene;TEA010033.1_gene;TEA010023.1_gene;TEA010032.1_gene;TEA010030.1_gene;TEA010037.1_gene;TEA010034.1_gene
MSTRG.144662.2	TEA027406.1_gene;TEA027347.1_gene;TEA027404.1_gene
MSTRG.70254.3	TEA011914.1_gene
MSTRG.131386.1	TEA003191.1_gene;TEA003194.1_gene;TEA003192.1_gene;TEA003193.1_gene;TEA003190.1_gene
MSTRG.35632.1	TEA006545.1_gene;TEA006550.1_gene;TEA006553.1_gene
MSTRG.73259.2	TEA031596.1_gene;TEA031605.1_gene;TEA031586.1_gene;TEA031610.1_gene
MSTRG.50721.3	TEA001733.1_gene;TEA001706.1_gene;TEA001718.1_gene;TEA001722.1_gene;TEA001721.1_gene
MSTRG.100540.1	TEA003044.1_gene;TEA003041.1_gene;TEA003040.1_gene;TEA003042.1_gene;TEA003043.1_gene
MSTRG.89981.1	TEA011424.1_gene
MSTRG.83303.1	TEA021407.1_gene;TEA021405.1_gene;TEA021406.1_gene;TEA021408.1_gene;TEA021409.1_gene
MSTRG.133197.1	TEA016433.1_gene;TEA016440.1_gene;TEA016445.1_gene;TEA016447.1_gene
MSTRG.64649.1	TEA023489.1_gene;TEA023473.1_gene;TEA023485.1_gene;TEA023463.1_gene;TEA023474.1_gene;TEA023461.1_gene
MSTRG.44573.1	TEA010292.1_gene;TEA010271.1_gene
MSTRG.115089.1	TEA006759.1_gene
MSTRG.47550.1	TEA021752.1_gene;TEA021762.1_gene;TEA021758.1_gene;TEA021764.1_gene
MSTRG.93778.38	TEA021814.1_gene
MSTRG.76121.3	TEA002179.1_gene
MSTRG.113740.4	TEA005063.1_gene;TEA005044.1_gene;TEA005036.1_gene;TEA005013.1_gene;TEA005073.1_gene;TEA005011.1_gene;TEA005021.1_gene
MSTRG.94843.1	TEA004357.1_gene;TEA004354.1_gene;TEA004356.1_gene;TEA004352.1_gene;TEA004358.1_gene;TEA004355.1_gene
[truncated: 11,978 more rows]
