# Supplementary material for: Integrated Analysis of Long Non-coding RNAs (lncRNAs) and mRNAs Reveals the Regulatory Role of lncRNAs Associated With Salt Resistance in Camellia sinensis
Source: Front Plant Sci. 2020 Mar 19;11:218. doi: 10.3389/fpls.2020.00218 (PMC7096555; doi:10.3389/fpls.2020.00218)
Supplement: TABLE S3 — Statistics of trans-target genes of DE-lncRNAs. [file Table_3.xls]

#LncRNA_ID	trans-target genes
MSTRG.118888.1	TEA021935.1_gene;TEA028207.1_gene;TEA012587.1_gene;TEA027260.1_gene;TEA024309.1_gene;TEA014581.1_gene;TEA006904.1_gene;TEA018215.1_gene;TEA002720.1_gene;TEA001057.1_gene;TEA013096.1_gene;TEA006700.1_gene;TEA002076.1_gene;TEA033061.1_gene;TEA003257.1_gene;TEA022419.1_gene;TEA001447.1_gene;TEA003606.1_gene;TEA015709.1_gene;TEA023893.1_gene;TEA013394.1_gene;TEA032417.1_gene;TEA007505.1_gene;TEA03327…
MSTRG.122444.1	TEA003019.1_gene
MSTRG.15254.1	TEA025647.1_gene;TEA021584.1_gene;TEA023485.1_gene;TEA016154.1_gene
MSTRG.138017.2	TEA013734.1_gene;TEA017447.1_gene;TEA002443.1_gene;TEA026506.1_gene;TEA008184.1_gene;TEA028571.1_gene;TEA006007.1_gene;TEA024841.1_gene;TEA013317.1_gene;TEA001807.1_gene;TEA006403.1_gene;TEA022890.1_gene;TEA023132.1_gene;TEA009653.1_gene;TEA033574.1_gene;TEA033493.1_gene;TEA014582.1_gene;TEA025668.1_gene;TEA002826.1_gene;TEA025634.1_gene;TEA001842.1_gene;TEA028811.1_gene;TEA009850.1_gene;TEA00071…
MSTRG.120942.4	TEA016154.1_gene;TEA025647.1_gene;TEA023485.1_gene
MSTRG.99894.12	TEA011342.1_gene;TEA004405.1_gene;TEA005893.1_gene;TEA008842.1_gene
MSTRG.12558.11	TEA025335.1_gene;TEA006783.1_gene;TEA000455.1_gene;TEA007636.1_gene;TEA033778.1_gene;TEA007602.1_gene;TEA022136.1_gene
MSTRG.21561.1	TEA031009.1_gene
MSTRG.111773.1	TEA013562.1_gene;TEA033207.1_gene
MSTRG.149824.1	TEA023929.1_gene;TEA018168.1_gene
MSTRG.73769.1	TEA025639.1_gene
MSTRG.5081.1	TEA025097.1_gene
MSTRG.52777.1	TEA027013.1_gene;TEA033226.1_gene;TEA019469.1_gene;TEA028335.1_gene;TEA028175.1_gene;TEA016412.1_gene;TEA007050.1_gene;TEA014067.1_gene;TEA003474.1_gene;TEA013662.1_gene;TEA016434.1_gene;TEA008541.1_gene;TEA018282.1_gene;TEA013889.1_gene;TEA005061.1_gene;TEA024984.1_gene;TEA029501.1_gene;TEA010131.1_gene;TEA010977.1_gene;TEA009546.1_gene;TEA010909.1_gene;TEA016575.1_gene;TEA033848.1_gene;TEA02974…
MSTRG.19656.2	TEA022119.1_gene;TEA000223.1_gene;TEA011468.1_gene;TEA032760.1_gene;TEA029259.1_gene;TEA028416.1_gene;TEA012034.1_gene;TEA018785.1_gene;TEA029646.1_gene;TEA013023.1_gene;TEA033091.1_gene;TEA011861.1_gene;TEA012045.1_gene;TEA019567.1_gene;TEA005543.1_gene;TEA009300.1_gene;TEA001678.1_gene;TEA033178.1_gene;TEA003277.1_gene;TEA024820.1_gene;TEA020202.1_gene;TEA020271.1_gene;TEA023756.1_gene;TEA00446…
MSTRG.46048.18	TEA009712.1_gene
MSTRG.71323.1	TEA026618.1_gene;TEA004895.1_gene;TEA010708.1_gene;TEA015967.1_gene;TEA022836.1_gene;TEA023947.1_gene;TEA021515.1_gene;TEA002738.1_gene;TEA033618.1_gene;TEA003955.1_gene;TEA019774.1_gene;TEA024674.1_gene;TEA030550.1_gene;TEA026549.1_gene;TEA005563.1_gene;TEA030111.1_gene;TEA031837.1_gene;TEA020102.1_gene;TEA010609.1_gene;TEA017119.1_gene;TEA026395.1_gene;TEA033782.1_gene;TEA000926.1_gene;TEA01736…
MSTRG.118953.1	TEA018208.1_gene;TEA025999.1_gene
MSTRG.19517.1	TEA014878.1_gene;TEA015439.1_gene;TEA009327.1_gene;TEA008137.1_gene;TEA018048.1_gene;TEA031601.1_gene
MSTRG.64644.1	TEA023489.1_gene
MSTRG.51452.1	TEA025647.1_gene;TEA021584.1_gene;TEA023485.1_gene;TEA016154.1_gene
MSTRG.16929.1	TEA018838.1_gene
MSTRG.87868.2	TEA016154.1_gene;TEA023485.1_gene;TEA025647.1_gene
MSTRG.101439.5	TEA032442.1_gene;TEA032438.1_gene;TEA012193.1_gene;TEA019999.1_gene;TEA012845.1_gene;TEA014662.1_gene;TEA017042.1_gene;TEA003310.1_gene;TEA015531.1_gene;TEA011169.1_gene;TEA029100.1_gene;TEA024702.1_gene;TEA027100.1_gene;TEA008157.1_gene;TEA018361.1_gene;TEA011446.1_gene;TEA005146.1_gene;TEA004951.1_gene;TEA022484.1_gene;TEA022479.1_gene;TEA018595.1_gene;TEA017210.1_gene;TEA023712.1_gene;TEA02064…
MSTRG.14046.1	TEA026521.1_gene;TEA015700.1_gene;TEA016141.1_gene;TEA019780.1_gene;TEA009595.1_gene;TEA016483.1_gene;TEA004010.1_gene;TEA023931.1_gene;TEA006001.1_gene;TEA029689.1_gene;TEA021891.1_gene;TEA028664.1_gene;TEA013067.1_gene;TEA026524.1_gene;TEA002802.1_gene;TEA003215.1_gene;TEA029833.1_gene;TEA029963.1_gene;TEA025162.1_gene;TEA008988.1_gene;TEA011732.1_gene;TEA010741.1_gene;TEA002169.1_gene;TEA01853…
MSTRG.93902.1	TEA032906.1_gene;TEA028604.1_gene;TEA019784.1_gene
MSTRG.92249.1	TEA006955.1_gene;TEA011734.1_gene;TEA011223.1_gene;TEA025093.1_gene;TEA009235.1_gene;TEA029149.1_gene
MSTRG.121737.4	TEA027795.1_gene;TEA022783.1_gene
MSTRG.18856.1	TEA033049.1_gene;TEA033046.1_gene;TEA006341.1_gene;TEA033048.1_gene;TEA009097.1_gene;TEA032376.1_gene;TEA011425.1_gene;TEA030146.1_gene;TEA030144.1_gene;TEA032375.1_gene;TEA017219.1_gene;TEA008815.1_gene;TEA017222.1_gene;TEA004307.1_gene;TEA017469.1_gene;TEA027743.1_gene;TEA004693.1_gene;TEA011030.1_gene;TEA021557.1_gene;TEA004304.1_gene;TEA021371.1_gene;TEA007496.1_gene;TEA019885.1_gene;TEA00782…
MSTRG.142705.1	TEA004240.1_gene
MSTRG.150730.18	TEA027795.1_gene;TEA022783.1_gene
MSTRG.51580.1	TEA005174.1_gene;TEA018167.1_gene;TEA019446.1_gene;TEA032289.1_gene;TEA018239.1_gene;TEA029321.1_gene;TEA029313.1_gene;TEA020363.1_gene;TEA020343.1_gene;TEA032542.1_gene
MSTRG.78783.1	TEA011509.1_gene;TEA011503.1_gene;TEA026321.1_gene
MSTRG.4912.4	TEA000601.1_gene;TEA017110.1_gene;TEA001417.1_gene;TEA026257.1_gene;TEA014695.1_gene
MSTRG.120283.24	TEA027795.1_gene;TEA022783.1_gene
MSTRG.399.2	TEA018508.1_gene;TEA018220.1_gene;TEA023759.1_gene;TEA011828.1_gene;TEA011187.1_gene;TEA008392.1_gene;TEA013975.1_gene;TEA017172.1_gene;TEA004158.1_gene;TEA011894.1_gene
MSTRG.49786.1	TEA016694.1_gene;TEA009587.1_gene
MSTRG.120284.5	TEA004240.1_gene
MSTRG.21459.1	TEA016740.1_gene
MSTRG.110115.2	TEA012755.1_gene;TEA024281.1_gene;TEA025647.1_gene;TEA021584.1_gene;TEA023485.1_gene;TEA016154.1_gene
MSTRG.101531.1	TEA011960.1_gene
MSTRG.19501.1	TEA027795.1_gene;TEA009712.1_gene;TEA003479.1_gene;TEA022783.1_gene
MSTRG.97701.1	TEA018988.1_gene
MSTRG.153611.1	TEA008449.1_gene;TEA032307.1_gene
MSTRG.100608.10	TEA011198.1_gene;TEA024504.1_gene
MSTRG.89027.1	TEA001009.1_gene
MSTRG.86136.1	TEA023341.1_gene;TEA012132.1_gene;TEA002261.1_gene
MSTRG.139876.1	TEA000513.1_gene;TEA014151.1_gene
MSTRG.96591.1	TEA022801.1_gene;TEA029709.1_gene
MSTRG.123666.1	TEA026726.1_gene;TEA020475.1_gene;TEA017923.1_gene;TEA009483.1_gene;TEA007192.1_gene;TEA021326.1_gene;TEA015612.1_gene;TEA015748.1_gene;TEA006454.1_gene;TEA018651.1_gene;TEA022073.1_gene;TEA008129.1_gene;TEA015563.1_gene;TEA030855.1_gene;TEA021717.1_gene;TEA021389.1_gene
MSTRG.120288.1	TEA027795.1_gene;TEA009712.1_gene;TEA022783.1_gene
MSTRG.144989.2	TEA027795.1_gene;TEA022783.1_gene
MSTRG.111908.1	TEA022637.1_gene
MSTRG.41917.2	TEA016597.1_gene;TEA019024.1_gene;TEA029877.1_gene
MSTRG.1891.1	TEA005047.1_gene
MSTRG.26356.1	TEA003140.1_gene
MSTRG.155251.2	TEA018075.1_gene;TEA016154.1_gene;TEA025647.1_gene
MSTRG.45375.2	TEA023485.1_gene;TEA025647.1_gene;TEA016154.1_gene
MSTRG.30465.2	TEA007205.1_gene;TEA016897.1_gene;TEA006557.1_gene
MSTRG.146619.1	TEA025647.1_gene;TEA009805.1_gene;TEA021584.1_gene;TEA023485.1_gene;TEA016154.1_gene;TEA008969.1_gene
MSTRG.64211.1	TEA014092.1_gene;TEA031319.1_gene;TEA005672.1_gene;TEA000287.1_gene;TEA021714.1_gene;TEA006837.1_gene;TEA001351.1_gene;TEA029662.1_gene;TEA027152.1_gene;TEA002548.1_gene;TEA004216.1_gene;TEA002184.1_gene;TEA017139.1_gene
MSTRG.82475.1	TEA004240.1_gene
MSTRG.44295.1	TEA022741.1_gene
MSTRG.96171.1	TEA010140.1_gene;TEA009163.1_gene
MSTRG.54809.2	TEA031031.1_gene
MSTRG.134237.1	TEA023485.1_gene;TEA025647.1_gene;TEA016154.1_gene
MSTRG.117757.1	TEA003479.1_gene;TEA027795.1_gene;TEA022783.1_gene;TEA009712.1_gene
MSTRG.144530.1	TEA020055.1_gene;TEA005911.1_gene;TEA010326.1_gene;TEA016902.1_gene;TEA032204.1_gene;TEA023408.1_gene
MSTRG.27067.1	TEA003966.1_gene;TEA000830.1_gene
MSTRG.96895.5	TEA004086.1_gene;TEA011340.1_gene
MSTRG.24102.1	TEA030310.1_gene;TEA008671.1_gene;TEA005988.1_gene;TEA008296.1_gene;TEA008938.1_gene;TEA000424.1_gene;TEA013280.1_gene;TEA003623.1_gene;TEA007281.1_gene;TEA001842.1_gene;TEA014899.1_gene;TEA000594.1_gene;TEA027544.1_gene;TEA025022.1_gene;TEA003602.1_gene;TEA026498.1_gene;TEA030358.1_gene;TEA006996.1_gene;TEA012087.1_gene;TEA028520.1_gene;TEA030881.1_gene;TEA026466.1_gene
MSTRG.120094.1	TEA007676.1_gene;TEA016395.1_gene;TEA015090.1_gene
MSTRG.138731.4	TEA023894.1_gene;TEA019234.1_gene
MSTRG.101573.1	TEA027795.1_gene;TEA003479.1_gene;TEA022783.1_gene
MSTRG.76432.1	TEA003371.1_gene
MSTRG.39303.2	TEA023485.1_gene;TEA016154.1_gene
MSTRG.70251.1	TEA024236.1_gene;TEA023485.1_gene;TEA025647.1_gene;TEA021584.1_gene;TEA016154.1_gene
MSTRG.6455.5	TEA027443.1_gene
MSTRG.149985.3	TEA022417.1_gene;TEA015222.1_gene;TEA027649.1_gene;TEA021026.1_gene;TEA033158.1_gene;TEA010397.1_gene;TEA014202.1_gene;TEA030855.1_gene;TEA006550.1_gene;TEA004322.1_gene;TEA013059.1_gene;TEA012388.1_gene;TEA018855.1_gene;TEA025162.1_gene;TEA003536.1_gene;TEA023604.1_gene;TEA018959.1_gene
MSTRG.39805.1	TEA011439.1_gene
MSTRG.146061.1	TEA017106.1_gene;TEA017088.1_gene;TEA002958.1_gene;TEA001718.1_gene;TEA024693.1_gene;TEA002343.1_gene;TEA006661.1_gene;TEA012320.1_gene;TEA002543.1_gene;TEA002018.1_gene;TEA007446.1_gene;TEA007584.1_gene;TEA002456.1_gene;TEA012966.1_gene;TEA010673.1_gene;TEA002976.1_gene;TEA008063.1_gene;TEA012195.1_gene;TEA015960.1_gene;TEA016596.1_gene;TEA000998.1_gene;TEA030902.1_gene;TEA021397.1_gene;TEA00999…
MSTRG.147410.1	TEA021584.1_gene;TEA025647.1_gene;TEA004833.1_gene;TEA023485.1_gene
MSTRG.87000.1	TEA018508.1_gene;TEA018220.1_gene;TEA011187.1_gene;TEA023759.1_gene;TEA011894.1_gene;TEA011828.1_gene;TEA008392.1_gene;TEA017172.1_gene;TEA025877.1_gene;TEA013975.1_gene;TEA005208.1_gene;TEA004158.1_gene;TEA012330.1_gene;TEA014682.1_gene;TEA028824.1_gene;TEA010263.1_gene;TEA000304.1_gene;TEA015961.1_gene;TEA029009.1_gene;TEA011198.1_gene
MSTRG.33958.9	TEA021055.1_gene;TEA009560.1_gene
MSTRG.85016.1	TEA002981.1_gene;TEA032281.1_gene;TEA004521.1_gene
MSTRG.19608.1	TEA009712.1_gene;TEA004240.1_gene;TEA002434.1_gene
MSTRG.135745.1	TEA004604.1_gene;TEA014330.1_gene;TEA003726.1_gene;TEA025422.1_gene;TEA029382.1_gene;TEA016963.1_gene;TEA019234.1_gene;TEA017454.1_gene;TEA033371.1_gene;TEA013302.1_gene;TEA027764.1_gene;TEA025705.1_gene;TEA017050.1_gene;TEA032178.1_gene;TEA011833.1_gene;TEA019784.1_gene
MSTRG.11537.2	TEA019719.1_gene
MSTRG.22539.1	TEA027676.1_gene
MSTRG.32725.1	TEA014633.1_gene;TEA032593.1_gene;TEA032877.1_gene
MSTRG.29417.1	TEA024599.1_gene;TEA022352.1_gene;TEA012258.1_gene
MSTRG.66008.5	TEA029841.1_gene
MSTRG.78202.1	TEA025647.1_gene;TEA021584.1_gene;TEA023485.1_gene;TEA016154.1_gene
MSTRG.131845.2	TEA028604.1_gene;TEA032906.1_gene
MSTRG.136018.1	TEA017579.1_gene
MSTRG.2701.4	TEA027795.1_gene
MSTRG.37351.1	TEA025647.1_gene;TEA021584.1_gene;TEA009805.1_gene;TEA023485.1_gene
MSTRG.9015.1	TEA000877.1_gene;TEA023074.1_gene;TEA016349.1_gene
MSTRG.33861.2	TEA008086.1_gene;TEA007168.1_gene
MSTRG.63133.1	TEA033251.1_gene;TEA018324.1_gene;TEA032519.1_gene
MSTRG.97291.1	TEA033223.1_gene;TEA002400.1_gene;TEA030923.1_gene
MSTRG.105960.2	TEA000877.1_gene;TEA023074.1_gene;TEA014219.1_gene;TEA016349.1_gene
MSTRG.17265.3	TEA009712.1_gene;TEA004240.1_gene
MSTRG.70911.1	TEA026810.1_gene
MSTRG.2694.21	TEA027795.1_gene;TEA003479.1_gene;TEA022783.1_gene;TEA009712.1_gene
MSTRG.64120.1	TEA020271.1_gene;TEA023756.1_gene;TEA009300.1_gene;TEA028416.1_gene;TEA028409.1_gene;TEA023600.1_gene;TEA030631.1_gene;TEA005543.1_gene;TEA000631.1_gene;TEA022079.1_gene;TEA019567.1_gene;TEA002448.1_gene;TEA005504.1_gene;TEA003277.1_gene;TEA014530.1_gene;TEA029870.1_gene;TEA021046.1_gene;TEA006271.1_gene;TEA017551.1_gene;TEA004464.1_gene;TEA022026.1_gene;TEA033719.1_gene;TEA007888.1_gene;TEA03317…
MSTRG.44540.10	TEA030547.1_gene;TEA002738.1_gene;TEA020563.1_gene
MSTRG.74067.1	TEA004010.1_gene;TEA024637.1_gene;TEA002085.1_gene;TEA009946.1_gene;TEA022874.1_gene;TEA005155.1_gene;TEA008856.1_gene;TEA013541.1_gene;TEA011732.1_gene;TEA015700.1_gene;TEA013136.1_gene;TEA000880.1_gene;TEA017977.1_gene;TEA020030.1_gene;TEA019204.1_gene;TEA009595.1_gene;TEA005699.1_gene;TEA020677.1_gene;TEA000639.1_gene;TEA029438.1_gene;TEA018522.1_gene;TEA006001.1_gene;TEA013086.1_gene;TEA02968…
MSTRG.4129.5	TEA033645.1_gene;TEA033110.1_gene;TEA013453.1_gene;TEA011029.1_gene;TEA002550.1_gene;TEA024281.1_gene;TEA031183.1_gene;TEA027949.1_gene;TEA001683.1_gene;TEA013375.1_gene;TEA002080.1_gene;TEA021504.1_gene;TEA021492.1_gene;TEA002690.1_gene;TEA002343.1_gene;TEA011970.1_gene;TEA004120.1_gene;TEA000859.1_gene;TEA022203.1_gene;TEA018904.1_gene;TEA016083.1_gene;TEA020879.1_gene;TEA034008.1_gene;TEA00887…
MSTRG.46307.1	TEA020911.1_gene
MSTRG.33252.1	TEA027129.1_gene;TEA001939.1_gene;TEA009151.1_gene;TEA009602.1_gene;TEA010107.1_gene;TEA029128.1_gene;TEA017337.1_gene;TEA024385.1_gene;TEA011752.1_gene;TEA017259.1_gene;TEA010927.1_gene;TEA014533.1_gene;TEA023116.1_gene;TEA007250.1_gene;TEA027508.1_gene;TEA009280.1_gene;TEA013461.1_gene;TEA003381.1_gene;TEA012694.1_gene
MSTRG.138078.1	TEA011864.1_gene
MSTRG.34250.10	TEA023082.1_gene;TEA013950.1_gene;TEA002676.1_gene;TEA022874.1_gene;TEA010741.1_gene;TEA012401.1_gene;TEA015941.1_gene
MSTRG.40343.1	TEA002672.1_gene
MSTRG.72786.2	TEA015485.1_gene;TEA016154.1_gene;TEA023485.1_gene
MSTRG.148612.1	TEA021780.1_gene
MSTRG.49530.1	TEA009605.1_gene;TEA002393.1_gene;TEA004596.1_gene;TEA001087.1_gene;TEA007707.1_gene;TEA001818.1_gene;TEA020380.1_gene
MSTRG.79652.1	TEA016312.1_gene;TEA010390.1_gene;TEA025890.1_gene
MSTRG.121728.3	TEA003479.1_gene;TEA022783.1_gene;TEA027795.1_gene;TEA009712.1_gene
MSTRG.31406.1	TEA001539.1_gene;TEA001790.1_gene
MSTRG.5182.1	TEA026454.1_gene
MSTRG.6113.1	TEA021971.1_gene;TEA021957.1_gene;TEA021959.1_gene;TEA031007.1_gene
MSTRG.85141.4	TEA017764.1_gene
MSTRG.108452.2	TEA031883.1_gene;TEA031891.1_gene;TEA031881.1_gene;TEA024678.1_gene;TEA006322.1_gene;TEA020576.1_gene;TEA003338.1_gene;TEA009947.1_gene;TEA003904.1_gene;TEA026147.1_gene;TEA013334.1_gene;TEA030267.1_gene;TEA009002.1_gene;TEA019920.1_gene;TEA028603.1_gene;TEA022679.1_gene
MSTRG.82475.2	TEA009712.1_gene;TEA004240.1_gene
MSTRG.24407.2	TEA025647.1_gene;TEA006218.1_gene;TEA021584.1_gene;TEA023485.1_gene;TEA016154.1_gene
MSTRG.1923.2	TEA027795.1_gene
MSTRG.9210.1	TEA002491.1_gene;TEA021522.1_gene;TEA029218.1_gene;TEA029583.1_gene;TEA030035.1_gene;TEA030312.1_gene;TEA019306.1_gene;TEA017101.1_gene;TEA015626.1_gene;TEA009174.1_gene;TEA004583.1_gene;TEA021751.1_gene;TEA028289.1_gene
MSTRG.81706.22	TEA008062.1_gene;TEA004634.1_gene;TEA004689.1_gene;TEA032972.1_gene;TEA013294.1_gene;TEA010397.1_gene;TEA018522.1_gene;TEA030183.1_gene;TEA013202.1_gene;TEA033279.1_gene;TEA017039.1_gene;TEA020023.1_gene
MSTRG.121728.6	TEA027795.1_gene;TEA022783.1_gene
MSTRG.30419.1	TEA019099.1_gene;TEA025647.1_gene;TEA016154.1_gene
MSTRG.2583.1	TEA025647.1_gene;TEA017305.1_gene;TEA021584.1_gene;TEA004833.1_gene;TEA023485.1_gene;TEA016154.1_gene
MSTRG.152732.1	TEA004064.1_gene;TEA023610.1_gene;TEA007899.1_gene;TEA014167.1_gene;TEA010488.1_gene
MSTRG.121471.6	TEA004240.1_gene;TEA009712.1_gene
MSTRG.81059.1	TEA018056.1_gene
MSTRG.37279.1	TEA025647.1_gene;TEA021584.1_gene;TEA023485.1_gene;TEA009805.1_gene;TEA016154.1_gene
MSTRG.99001.1	TEA004015.1_gene;TEA016222.1_gene
MSTRG.111086.15	TEA013267.1_gene
MSTRG.14178.1	TEA023485.1_gene
MSTRG.125048.1	TEA007477.1_gene;TEA001338.1_gene;TEA011029.1_gene;TEA023485.1_gene;TEA025647.1_gene;TEA004120.1_gene;TEA016154.1_gene
MSTRG.108410.4	TEA029218.1_gene;TEA002491.1_gene;TEA028289.1_gene;TEA019306.1_gene;TEA029583.1_gene;TEA015626.1_gene;TEA021522.1_gene;TEA030312.1_gene;TEA030035.1_gene;TEA021751.1_gene;TEA017101.1_gene
MSTRG.121725.1	TEA029218.1_gene;TEA029583.1_gene;TEA021522.1_gene;TEA019306.1_gene;TEA015626.1_gene;TEA021751.1_gene
MSTRG.17643.1	TEA002528.1_gene;TEA011325.1_gene
MSTRG.19778.2	TEA025236.1_gene;TEA022307.1_gene;TEA028898.1_gene;TEA031169.1_gene;TEA000813.1_gene;TEA023535.1_gene;TEA023987.1_gene;TEA001871.1_gene;TEA017046.1_gene;TEA025530.1_gene;TEA025525.1_gene;TEA000468.1_gene;TEA021754.1_gene;TEA032295.1_gene;TEA025985.1_gene;TEA030882.1_gene;TEA029005.1_gene;TEA027528.1_gene;TEA033493.1_gene;TEA010672.1_gene;TEA006369.1_gene;TEA023110.1_gene;TEA003693.1_gene;TEA00369…
MSTRG.127581.1	TEA010708.1_gene
MSTRG.118694.2	TEA022741.1_gene
MSTRG.121125.2	TEA030624.1_gene;TEA013043.1_gene;TEA032756.1_gene
MSTRG.65084.1	TEA004214.1_gene;TEA015134.1_gene;TEA009276.1_gene;TEA003705.1_gene;TEA027920.1_gene;TEA007895.1_gene;TEA011300.1_gene;TEA026593.1_gene;TEA029795.1_gene;TEA001497.1_gene;TEA025676.1_gene;TEA023987.1_gene;TEA005372.1_gene;TEA015414.1_gene;TEA015859.1_gene;TEA012880.1_gene;TEA005605.1_gene;TEA010672.1_gene;TEA028766.1_gene;TEA024841.1_gene;TEA025194.1_gene;TEA033241.1_gene;TEA014042.1_gene;TEA00164…
MSTRG.124942.1	TEA025647.1_gene;TEA021584.1_gene;TEA023485.1_gene;TEA016154.1_gene
MSTRG.616.1	TEA002428.1_gene;TEA002025.1_gene;TEA016154.1_gene;TEA025647.1_gene
MSTRG.55413.1	TEA029399.1_gene;TEA012962.1_gene;TEA021913.1_gene;TEA016421.1_gene
MSTRG.42492.1	TEA032863.1_gene;TEA016154.1_gene;TEA025647.1_gene
MSTRG.132688.1	TEA024931.1_gene;TEA031655.1_gene;TEA031631.1_gene;TEA024933.1_gene;TEA031660.1_gene;TEA031644.1_gene;TEA020101.1_gene
MSTRG.152990.2	TEA002656.1_gene;TEA033592.1_gene;TEA006740.1_gene;TEA016809.1_gene;TEA032434.1_gene;TEA032432.1_gene;TEA016802.1_gene;TEA002370.1_gene;TEA004924.1_gene;TEA033569.1_gene;TEA032639.1_gene;TEA027816.1_gene;TEA008374.1_gene;TEA031337.1_gene;TEA013263.1_gene;TEA027256.1_gene
MSTRG.87789.2	TEA015549.1_gene
MSTRG.154749.1	TEA020262.1_gene;TEA006848.1_gene
MSTRG.22533.1	TEA010520.1_gene;TEA014088.1_gene
MSTRG.32859.3	TEA029730.1_gene;TEA016154.1_gene;TEA025647.1_gene
MSTRG.96764.1	TEA009141.1_gene;TEA017618.1_gene;TEA023909.1_gene;TEA022676.1_gene;TEA014955.1_gene;TEA033778.1_gene;TEA010482.1_gene;TEA027109.1_gene;TEA027296.1_gene;TEA023908.1_gene;TEA023928.1_gene;TEA023925.1_gene;TEA024529.1_gene;TEA011846.1_gene;TEA030496.1_gene;TEA023453.1_gene;TEA008030.1_gene;TEA005085.1_gene;TEA022995.1_gene;TEA013969.1_gene;TEA005486.1_gene;TEA015271.1_gene;TEA009217.1_gene;TEA01025…
MSTRG.128588.1	TEA028765.1_gene;TEA017195.1_gene;TEA004862.1_gene
MSTRG.113772.4	TEA005043.1_gene
MSTRG.94251.1	TEA006920.1_gene;TEA014597.1_gene;TEA033401.1_gene;TEA001554.1_gene;TEA033264.1_gene;TEA004424.1_gene
MSTRG.65310.2	TEA026748.1_gene
MSTRG.121741.1	TEA000877.1_gene;TEA023074.1_gene;TEA016349.1_gene;TEA014219.1_gene
MSTRG.66256.1	TEA016154.1_gene
MSTRG.45626.1	TEA023252.1_gene;TEA012425.1_gene;TEA027727.1_gene;TEA000491.1_gene;TEA000481.1_gene;TEA009401.1_gene;TEA031370.1_gene;TEA017942.1_gene;TEA026329.1_gene
MSTRG.111437.1	TEA001222.1_gene;TEA031444.1_gene;TEA001641.1_gene;TEA021579.1_gene;TEA018515.1_gene
MSTRG.58364.1	TEA032906.1_gene;TEA000220.1_gene;TEA028604.1_gene
MSTRG.29961.2	TEA005741.1_gene;TEA004453.1_gene
MSTRG.122694.1	TEA028334.1_gene;TEA016154.1_gene;TEA025647.1_gene;TEA021584.1_gene;TEA008223.1_gene;TEA007941.1_gene
MSTRG.103512.8	TEA029653.1_gene;TEA032130.1_gene;TEA019076.1_gene;TEA008584.1_gene;TEA004430.1_gene;TEA012512.1_gene;TEA014090.1_gene;TEA019876.1_gene;TEA017710.1_gene;TEA020185.1_gene;TEA020149.1_gene;TEA003157.1_gene;TEA017481.1_gene;TEA009415.1_gene;TEA006280.1_gene;TEA010358.1_gene;TEA010450.1_gene;TEA023053.1_gene
MSTRG.29215.1	TEA016529.1_gene;TEA020379.1_gene;TEA022186.1_gene;TEA011119.1_gene;TEA011857.1_gene;TEA012649.1_gene;TEA016807.1_gene;TEA025219.1_gene;TEA011433.1_gene;TEA029122.1_gene;TEA009417.1_gene;TEA024861.1_gene;TEA000178.1_gene;TEA032201.1_gene;TEA014458.1_gene;TEA014149.1_gene;TEA000752.1_gene;TEA006962.1_gene;TEA023386.1_gene;TEA030755.1_gene;TEA018364.1_gene;TEA009527.1_gene;TEA033823.1_gene;TEA02836…
MSTRG.81678.1	TEA012796.1_gene
MSTRG.66620.1	TEA016154.1_gene;TEA023485.1_gene;TEA025647.1_gene
MSTRG.55673.1	TEA006266.1_gene
MSTRG.106846.3	TEA029442.1_gene;TEA025647.1_gene
MSTRG.11807.3	TEA025647.1_gene;TEA023485.1_gene;TEA016154.1_gene
MSTRG.2694.1	TEA027795.1_gene;TEA022783.1_gene
MSTRG.145878.2	TEA028142.1_gene;TEA013548.1_gene;TEA005677.1_gene;TEA005517.1_gene;TEA010146.1_gene;TEA011661.1_gene;TEA014357.1_gene;TEA019049.1_gene;TEA004471.1_gene;TEA016181.1_gene;TEA025525.1_gene;TEA013233.1_gene;TEA014280.1_gene;TEA013610.1_gene;TEA015859.1_gene;TEA017222.1_gene;TEA008975.1_gene;TEA015586.1_gene;TEA002512.1_gene;TEA006182.1_gene;TEA012880.1_gene;TEA030150.1_gene;TEA006751.1_gene;TEA03259…
MSTRG.130429.1	TEA003277.1_gene;TEA023756.1_gene;TEA028409.1_gene;TEA020271.1_gene;TEA023600.1_gene;TEA019567.1_gene;TEA005543.1_gene;TEA009300.1_gene;TEA028416.1_gene;TEA004464.1_gene;TEA033719.1_gene;TEA014530.1_gene;TEA017551.1_gene;TEA007888.1_gene;TEA005504.1_gene;TEA001678.1_gene;TEA030631.1_gene;TEA033178.1_gene;TEA020202.1_gene;TEA032760.1_gene;TEA000631.1_gene;TEA013023.1_gene;TEA006271.1_gene;TEA02207…
MSTRG.136701.1	TEA001641.1_gene;TEA031444.1_gene;TEA001222.1_gene;TEA022801.1_gene;TEA009629.1_gene;TEA021579.1_gene;TEA004063.1_gene;TEA029167.1_gene;TEA016348.1_gene;TEA015836.1_gene;TEA012354.1_gene;TEA022098.1_gene
MSTRG.61105.3	TEA025805.1_gene;TEA017983.1_gene;TEA031837.1_gene
MSTRG.153737.1	TEA013943.1_gene;TEA016901.1_gene;TEA017671.1_gene
MSTRG.37050.1	TEA010526.1_gene
MSTRG.58574.1	TEA009554.1_gene;TEA009778.1_gene;TEA024795.1_gene;TEA024374.1_gene;TEA026326.1_gene;TEA028262.1_gene;TEA009068.1_gene;TEA015921.1_gene;TEA027645.1_gene;TEA003159.1_gene;TEA023603.1_gene;TEA002993.1_gene;TEA021332.1_gene;TEA000383.1_gene
MSTRG.3779.1	TEA018837.1_gene
MSTRG.58793.1	TEA023485.1_gene;TEA016154.1_gene;TEA025647.1_gene;TEA021584.1_gene
MSTRG.2699.2	TEA027795.1_gene;TEA022783.1_gene;TEA009712.1_gene;TEA003479.1_gene
MSTRG.32243.3	TEA017337.1_gene
MSTRG.63983.1	TEA009767.1_gene;TEA001254.1_gene
MSTRG.120581.1	TEA007715.1_gene;TEA007720.1_gene;TEA032046.1_gene;TEA015561.1_gene
MSTRG.26585.2	TEA006252.1_gene
MSTRG.77581.1	TEA018775.1_gene
MSTRG.105901.1	TEA004127.1_gene;TEA016888.1_gene;TEA021074.1_gene;TEA006484.1_gene;TEA025351.1_gene;TEA030552.1_gene;TEA020870.1_gene;TEA014662.1_gene;TEA030267.1_gene;TEA026957.1_gene;TEA015130.1_gene;TEA001765.1_gene;TEA004322.1_gene;TEA033653.1_gene;TEA020465.1_gene;TEA029963.1_gene;TEA016784.1_gene;TEA008649.1_gene;TEA024123.1_gene;TEA009412.1_gene;TEA019688.1_gene
MSTRG.49198.1	TEA026094.1_gene
MSTRG.19502.1	TEA009712.1_gene;TEA004240.1_gene
MSTRG.64329.1	TEA000472.1_gene;TEA019420.1_gene;TEA004086.1_gene;TEA007369.1_gene;TEA022535.1_gene;TEA031059.1_gene;TEA010723.1_gene;TEA030520.1_gene;TEA018161.1_gene;TEA019240.1_gene;TEA000239.1_gene;TEA025878.1_gene;TEA022388.1_gene;TEA012709.1_gene;TEA021858.1_gene;TEA005493.1_gene;TEA027950.1_gene;TEA020641.1_gene;TEA033165.1_gene;TEA027283.1_gene;TEA027273.1_gene;TEA009777.1_gene;TEA010764.1_gene;TEA02357…
MSTRG.101439.4	TEA032442.1_gene;TEA032438.1_gene;TEA012193.1_gene;TEA019999.1_gene;TEA012845.1_gene;TEA011169.1_gene;TEA003310.1_gene;TEA029100.1_gene;TEA004951.1_gene;TEA022484.1_gene;TEA029179.1_gene;TEA014865.1_gene;TEA028796.1_gene;TEA012348.1_gene;TEA010868.1_gene;TEA031405.1_gene;TEA014662.1_gene;TEA017042.1_gene;TEA033755.1_gene;TEA033747.1_gene;TEA003214.1_gene;TEA000250.1_gene;TEA002218.1_gene;TEA02710…
MSTRG.82473.5	TEA022783.1_gene;TEA027795.1_gene;TEA003479.1_gene;TEA009712.1_gene
MSTRG.121471.15	TEA027795.1_gene
MSTRG.23426.3	TEA030485.1_gene;TEA015639.1_gene;TEA012790.1_gene;TEA025441.1_gene;TEA016715.1_gene
MSTRG.132992.2	TEA000843.1_gene;TEA016986.1_gene;TEA002500.1_gene
MSTRG.41902.1	TEA023894.1_gene
MSTRG.112676.1	TEA034002.1_gene;TEA002357.1_gene;TEA022739.1_gene;TEA003732.1_gene;TEA020315.1_gene;TEA023835.1_gene;TEA007970.1_gene;TEA029137.1_gene;TEA023391.1_gene;TEA023251.1_gene;TEA001503.1_gene;TEA015001.1_gene;TEA001885.1_gene
MSTRG.150730.14	TEA027795.1_gene
MSTRG.101573.7	TEA027795.1_gene;TEA022783.1_gene
MSTRG.130366.1	TEA016360.1_gene
MSTRG.133164.1	TEA000026.1_gene;TEA001800.1_gene;TEA030953.1_gene;TEA020296.1_gene;TEA019361.1_gene;TEA006575.1_gene;TEA027660.1_gene;TEA023896.1_gene;TEA004199.1_gene;TEA020791.1_gene;TEA015885.1_gene;TEA004482.1_gene;TEA019359.1_gene
MSTRG.43955.3	TEA009712.1_gene;TEA004240.1_gene
MSTRG.145316.6	TEA027795.1_gene;TEA022783.1_gene
MSTRG.30465.4	TEA007205.1_gene;TEA016897.1_gene;TEA006557.1_gene
MSTRG.48115.5	TEA024342.1_gene;TEA020611.1_gene;TEA028334.1_gene;TEA003766.1_gene;TEA003192.1_gene;TEA019525.1_gene;TEA025428.1_gene;TEA021465.1_gene;TEA007300.1_gene;TEA020530.1_gene;TEA021718.1_gene;TEA021584.1_gene;TEA022825.1_gene;TEA029589.1_gene;TEA018805.1_gene;TEA027508.1_gene;TEA028803.1_gene;TEA033496.1_gene;TEA015684.1_gene;TEA019988.1_gene;TEA021504.1_gene;TEA021492.1_gene;TEA018270.1_gene;TEA00174…
MSTRG.3498.1	TEA013732.1_gene;TEA001371.1_gene;TEA026241.1_gene;TEA004507.1_gene
MSTRG.41410.2	TEA010887.1_gene
MSTRG.124710.1	TEA020640.1_gene;TEA030038.1_gene;TEA009718.1_gene
MSTRG.70753.2	TEA007743.1_gene
MSTRG.56379.1	TEA000885.1_gene
MSTRG.1763.1	TEA010263.1_gene;TEA007621.1_gene;TEA029009.1_gene;TEA014682.1_gene;TEA011198.1_gene
MSTRG.154998.1	TEA019618.1_gene
MSTRG.58414.6	TEA033783.1_gene;TEA007478.1_gene;TEA025647.1_gene;TEA021584.1_gene
MSTRG.27815.1	TEA002668.1_gene
MSTRG.41912.2	TEA011844.1_gene;TEA032112.1_gene;TEA030898.1_gene;TEA007326.1_gene;TEA017866.1_gene;TEA017857.1_gene;TEA031972.1_gene;TEA004539.1_gene;TEA023912.1_gene
MSTRG.148670.1	TEA033367.1_gene;TEA000161.1_gene
MSTRG.134876.2	TEA019719.1_gene
MSTRG.50148.3	TEA017970.1_gene
MSTRG.147964.1	TEA022484.1_gene;TEA008943.1_gene;TEA031405.1_gene;TEA006501.1_gene;TEA023057.1_gene;TEA018091.1_gene;TEA013125.1_gene;TEA024719.1_gene;TEA002565.1_gene;TEA022099.1_gene;TEA012643.1_gene;TEA014458.1_gene;TEA018551.1_gene;TEA028577.1_gene;TEA000113.1_gene
MSTRG.132579.1	TEA025647.1_gene;TEA021584.1_gene;TEA016154.1_gene
MSTRG.121525.49	TEA027795.1_gene;TEA022783.1_gene
MSTRG.134713.3	TEA017677.1_gene;TEA030632.1_gene;TEA021767.1_gene;TEA013125.1_gene;TEA018657.1_gene;TEA020379.1_gene;TEA027223.1_gene;TEA023524.1_gene;TEA015415.1_gene;TEA016074.1_gene;TEA008812.1_gene;TEA008701.1_gene;TEA022043.1_gene;TEA030444.1_gene;TEA024944.1_gene;TEA012135.1_gene;TEA025388.1_gene;TEA007439.1_gene;TEA010268.1_gene;TEA022141.1_gene;TEA030894.1_gene;TEA002521.1_gene;TEA000332.1_gene;TEA02825…
MSTRG.81151.1	TEA017369.1_gene;TEA002539.1_gene;TEA009502.1_gene;TEA005200.1_gene
MSTRG.66582.1	TEA000600.1_gene;TEA011301.1_gene;TEA013592.1_gene;TEA016121.1_gene;TEA016119.1_gene;TEA008443.1_gene;TEA022470.1_gene;TEA001655.1_gene;TEA028741.1_gene
MSTRG.150730.24	TEA027795.1_gene
MSTRG.58597.2	TEA031301.1_gene;TEA014471.1_gene
MSTRG.125663.1	TEA017457.1_gene;TEA031431.1_gene;TEA013085.1_gene;TEA005749.1_gene;TEA004452.1_gene;TEA030094.1_gene
MSTRG.47371.3	TEA011687.1_gene
MSTRG.29475.1	TEA020727.1_gene
MSTRG.51697.1	TEA029375.1_gene;TEA013728.1_gene;TEA018250.1_gene;TEA017515.1_gene;TEA024861.1_gene;TEA019234.1_gene;TEA006033.1_gene;TEA031131.1_gene;TEA018072.1_gene;TEA021065.1_gene;TEA007078.1_gene;TEA030707.1_gene
MSTRG.52404.8	TEA033134.1_gene;TEA001748.1_gene;TEA004212.1_gene;TEA020836.1_gene;TEA022825.1_gene;TEA020611.1_gene;TEA019988.1_gene;TEA014446.1_gene;TEA017354.1_gene;TEA024342.1_gene;TEA033279.1_gene;TEA017516.1_gene;TEA011033.1_gene;TEA008223.1_gene;TEA029589.1_gene;TEA018805.1_gene;TEA027508.1_gene;TEA028803.1_gene;TEA005473.1_gene;TEA015684.1_gene;TEA021504.1_gene;TEA021492.1_gene;TEA018270.1_gene;TEA00269…
MSTRG.117574.1	TEA023581.1_gene;TEA026457.1_gene
MSTRG.149269.1	TEA027795.1_gene;TEA022783.1_gene;TEA003479.1_gene
MSTRG.37086.1	TEA017743.1_gene;TEA017441.1_gene;TEA008293.1_gene;TEA002230.1_gene;TEA021164.1_gene;TEA024944.1_gene;TEA018741.1_gene;TEA018551.1_gene;TEA022099.1_gene;TEA033461.1_gene;TEA012928.1_gene;TEA002477.1_gene;TEA002471.1_gene;TEA024718.1_gene;TEA014500.1_gene;TEA002926.1_gene;TEA027476.1_gene;TEA012423.1_gene;TEA019769.1_gene;TEA000239.1_gene;TEA013608.1_gene
MSTRG.142598.1	TEA019349.1_gene;TEA010079.1_gene
MSTRG.21406.2	TEA007779.1_gene;TEA032544.1_gene;TEA029484.1_gene;TEA033134.1_gene;TEA025313.1_gene;TEA024281.1_gene;TEA034026.1_gene;TEA025647.1_gene;TEA011033.1_gene;TEA029810.1_gene;TEA027508.1_gene;TEA028803.1_gene;TEA005473.1_gene;TEA003192.1_gene;TEA002343.1_gene;TEA011029.1_gene;TEA013453.1_gene;TEA013098.1_gene;TEA009899.1_gene;TEA016154.1_gene;TEA023571.1_gene;TEA007300.1_gene;TEA005093.1_gene;TEA03096…
MSTRG.112391.1	TEA018220.1_gene;TEA018508.1_gene;TEA028604.1_gene
MSTRG.132444.1	TEA023367.1_gene
MSTRG.28722.2	TEA009602.1_gene
MSTRG.26281.1	TEA009253.1_gene;TEA012643.1_gene;TEA028796.1_gene;TEA024718.1_gene;TEA028680.1_gene;TEA018551.1_gene;TEA030403.1_gene;TEA005570.1_gene;TEA015960.1_gene;TEA016023.1_gene;TEA018298.1_gene;TEA032912.1_gene;TEA022099.1_gene;TEA007050.1_gene;TEA019213.1_gene;TEA017969.1_gene;TEA020379.1_gene;TEA027476.1_gene;TEA027223.1_gene;TEA012195.1_gene;TEA018091.1_gene;TEA014653.1_gene;TEA002456.1_gene;TEA01921…
MSTRG.85952.2	TEA010805.1_gene
MSTRG.83582.3	TEA003911.1_gene;TEA014849.1_gene;TEA031727.1_gene;TEA010333.1_gene
MSTRG.42904.5	TEA030083.1_gene
MSTRG.142694.5	TEA027795.1_gene
MSTRG.142169.1	TEA014443.1_gene
MSTRG.30582.2	TEA028459.1_gene
MSTRG.7776.2	TEA020401.1_gene
MSTRG.117820.1	TEA027795.1_gene;TEA003479.1_gene;TEA022783.1_gene;TEA009712.1_gene
MSTRG.51463.1	TEA024391.1_gene;TEA014081.1_gene;TEA018386.1_gene;TEA022950.1_gene;TEA013757.1_gene;TEA008229.1_gene;TEA008225.1_gene;TEA018387.1_gene;TEA018400.1_gene;TEA022710.1_gene;TEA016084.1_gene;TEA016371.1_gene;TEA030742.1_gene;TEA022489.1_gene;TEA002418.1_gene;TEA012625.1_gene;TEA002543.1_gene;TEA012478.1_gene;TEA011694.1_gene;TEA012671.1_gene;TEA012670.1_gene;TEA011752.1_gene;TEA033461.1_gene;TEA00161…
MSTRG.44925.1	TEA031987.1_gene
MSTRG.2894.2	TEA027316.1_gene;TEA003395.1_gene;TEA031458.1_gene;TEA022191.1_gene;TEA029058.1_gene;TEA015112.1_gene;TEA027917.1_gene;TEA000117.1_gene;TEA003087.1_gene;TEA032565.1_gene;TEA029963.1_gene;TEA033385.1_gene;TEA022940.1_gene;TEA007797.1_gene;TEA023592.1_gene;TEA030547.1_gene;TEA029874.1_gene;TEA028160.1_gene;TEA009412.1_gene
MSTRG.31712.1	TEA025349.1_gene;TEA016784.1_gene;TEA006965.1_gene;TEA025361.1_gene;TEA015050.1_gene;TEA012758.1_gene;TEA021949.1_gene;TEA030860.1_gene;TEA021475.1_gene;TEA023914.1_gene
MSTRG.20691.1	TEA001433.1_gene;TEA012335.1_gene
MSTRG.83608.1	TEA019306.1_gene;TEA015626.1_gene;TEA021751.1_gene
MSTRG.82473.7	TEA022783.1_gene;TEA027795.1_gene;TEA003479.1_gene;TEA009712.1_gene
MSTRG.42492.3	TEA016154.1_gene;TEA025647.1_gene
MSTRG.82469.1	TEA021584.1_gene;TEA025647.1_gene;TEA023485.1_gene;TEA016154.1_gene
MSTRG.108410.13	TEA002491.1_gene;TEA019306.1_gene;TEA029583.1_gene;TEA015626.1_gene;TEA021751.1_gene
MSTRG.106151.1	TEA016529.1_gene;TEA022186.1_gene;TEA032201.1_gene;TEA009417.1_gene;TEA016807.1_gene;TEA029122.1_gene;TEA025219.1_gene;TEA000178.1_gene;TEA018364.1_gene;TEA026022.1_gene;TEA021414.1_gene;TEA012649.1_gene;TEA011857.1_gene;TEA020379.1_gene;TEA011119.1_gene;TEA033823.1_gene;TEA024861.1_gene;TEA011433.1_gene;TEA014149.1_gene;TEA023386.1_gene;TEA000752.1_gene;TEA006962.1_gene;TEA009527.1_gene
MSTRG.100535.1	TEA013836.1_gene;TEA026257.1_gene
MSTRG.112501.6	TEA016154.1_gene
MSTRG.66886.6	TEA021251.1_gene
MSTRG.91303.1	TEA028604.1_gene;TEA032906.1_gene;TEA020835.1_gene;TEA019784.1_gene;TEA018462.1_gene;TEA018045.1_gene;TEA010656.1_gene;TEA020236.1_gene;TEA002343.1_gene;TEA013549.1_gene;TEA010047.1_gene;TEA033018.1_gene;TEA006094.1_gene;TEA018876.1_gene;TEA031200.1_gene;TEA001611.1_gene;TEA033370.1_gene;TEA033451.1_gene;TEA021419.1_gene;TEA009644.1_gene
MSTRG.121744.1	TEA000877.1_gene;TEA023074.1_gene
MSTRG.59654.2	TEA032068.1_gene;TEA032521.1_gene
MSTRG.121552.1	TEA029418.1_gene
MSTRG.19336.1	TEA017285.1_gene;TEA002813.1_gene;TEA011207.1_gene;TEA011911.1_gene;TEA003735.1_gene;TEA032609.1_gene;TEA024118.1_gene;TEA026613.1_gene
MSTRG.141963.1	TEA016154.1_gene;TEA001954.1_gene;TEA025647.1_gene
MSTRG.127427.2	TEA021524.1_gene
MSTRG.41186.1	TEA012671.1_gene;TEA011754.1_gene;TEA012632.1_gene
MSTRG.21876.1	TEA009290.1_gene;TEA009294.1_gene;TEA026939.1_gene;TEA009309.1_gene;TEA016673.1_gene;TEA001064.1_gene;TEA001055.1_gene;TEA001054.1_gene;TEA001062.1_gene;TEA001057.1_gene;TEA024624.1_gene;TEA010008.1_gene;TEA032162.1_gene;TEA012625.1_gene;TEA012670.1_gene;TEA032153.1_gene;TEA011694.1_gene;TEA011752.1_gene;TEA003171.1_gene;TEA016995.1_gene;TEA016994.1_gene;TEA018441.1_gene;TEA018437.1_gene;TEA01239…
MSTRG.150731.1	TEA009712.1_gene
MSTRG.98596.1	TEA014467.1_gene;TEA004410.1_gene
MSTRG.72627.1	TEA012362.1_gene;TEA004021.1_gene;TEA025733.1_gene;TEA006355.1_gene;TEA012358.1_gene;TEA004471.1_gene;TEA004467.1_gene;TEA031945.1_gene;TEA003887.1_gene;TEA011572.1_gene;TEA029521.1_gene
MSTRG.31042.2	TEA001815.1_gene;TEA001807.1_gene;TEA002477.1_gene;TEA005627.1_gene;TEA032805.1_gene;TEA003260.1_gene;TEA022207.1_gene;TEA011818.1_gene;TEA030001.1_gene;TEA026673.1_gene;TEA030139.1_gene;TEA012655.1_gene;TEA016304.1_gene;TEA012788.1_gene
MSTRG.7757.1	TEA005933.1_gene
MSTRG.14336.1	TEA025647.1_gene;TEA016154.1_gene;TEA023485.1_gene
MSTRG.52254.1	TEA003155.1_gene
MSTRG.70779.1	TEA020131.1_gene;TEA019049.1_gene;TEA002814.1_gene;TEA001155.1_gene;TEA019832.1_gene;TEA001745.1_gene;TEA011254.1_gene;TEA022579.1_gene;TEA013636.1_gene;TEA012879.1_gene;TEA009419.1_gene
MSTRG.30841.2	TEA018515.1_gene
MSTRG.65787.1	TEA018124.1_gene;TEA014709.1_gene
MSTRG.61129.1	TEA013721.1_gene;TEA021803.1_gene;TEA022788.1_gene
MSTRG.76715.1	TEA010888.1_gene
MSTRG.130456.4	TEA025647.1_gene;TEA021584.1_gene;TEA016154.1_gene;TEA023485.1_gene
MSTRG.121525.9	TEA027795.1_gene;TEA022783.1_gene
MSTRG.89922.2	TEA016527.1_gene;TEA026879.1_gene;TEA026943.1_gene;TEA019953.1_gene;TEA024205.1_gene;TEA022723.1_gene;TEA004626.1_gene;TEA031761.1_gene;TEA019201.1_gene
MSTRG.121474.2	TEA027795.1_gene
MSTRG.58871.1	TEA006875.1_gene;TEA033458.1_gene;TEA013136.1_gene;TEA008856.1_gene;TEA022527.1_gene;TEA012339.1_gene;TEA026761.1_gene;TEA006550.1_gene;TEA017291.1_gene;TEA020677.1_gene;TEA026521.1_gene;TEA014956.1_gene;TEA014662.1_gene
MSTRG.88671.1	TEA025108.1_gene;TEA015665.1_gene
MSTRG.36615.9	TEA019845.1_gene
MSTRG.55310.1	TEA012330.1_gene;TEA010592.1_gene;TEA004162.1_gene;TEA014682.1_gene;TEA013587.1_gene;TEA005150.1_gene;TEA010111.1_gene;TEA025331.1_gene;TEA019393.1_gene;TEA012875.1_gene;TEA005208.1_gene;TEA008385.1_gene;TEA007856.1_gene;TEA015305.1_gene;TEA002726.1_gene;TEA011616.1_gene;TEA032218.1_gene;TEA011764.1_gene;TEA022703.1_gene;TEA011221.1_gene;TEA032815.1_gene;TEA010263.1_gene;TEA022341.1_gene;TEA01596…
MSTRG.84128.1	TEA027313.1_gene;TEA012491.1_gene;TEA006162.1_gene;TEA022720.1_gene
MSTRG.126006.1	TEA009526.1_gene
MSTRG.81748.1	TEA005208.1_gene;TEA012330.1_gene;TEA010111.1_gene;TEA004162.1_gene;TEA014682.1_gene;TEA010592.1_gene;TEA012875.1_gene;TEA011764.1_gene;TEA015305.1_gene
MSTRG.108581.3	TEA018789.1_gene
MSTRG.62056.1	TEA009535.1_gene;TEA009534.1_gene;TEA019254.1_gene;TEA027316.1_gene;TEA027917.1_gene;TEA029689.1_gene;TEA009533.1_gene;TEA003395.1_gene;TEA018729.1_gene;TEA015371.1_gene;TEA029130.1_gene
MSTRG.69471.1	TEA032824.1_gene
MSTRG.16842.1	TEA026969.1_gene
MSTRG.150729.4	TEA009712.1_gene;TEA004240.1_gene
MSTRG.121525.29	TEA027795.1_gene;TEA022783.1_gene
MSTRG.124172.1	TEA033674.1_gene
MSTRG.98199.1	TEA027917.1_gene
MSTRG.81796.1	TEA006725.1_gene
MSTRG.106383.1	TEA028994.1_gene
MSTRG.117675.3	TEA016154.1_gene;TEA023485.1_gene
MSTRG.40499.2	TEA017770.1_gene;TEA029278.1_gene;TEA011002.1_gene;TEA006256.1_gene;TEA000644.1_gene;TEA011018.1_gene;TEA002126.1_gene;TEA024149.1_gene;TEA001015.1_gene;TEA000817.1_gene;TEA001207.1_gene
MSTRG.145316.35	TEA027795.1_gene;TEA022783.1_gene
MSTRG.49783.1	TEA012115.1_gene;TEA031024.1_gene;TEA003657.1_gene;TEA028912.1_gene
MSTRG.1108.1	TEA028435.1_gene;TEA028423.1_gene;TEA028433.1_gene;TEA000375.1_gene;TEA004361.1_gene;TEA031526.1_gene;TEA011882.1_gene;TEA008552.1_gene;TEA008545.1_gene;TEA029411.1_gene;TEA028382.1_gene;TEA004443.1_gene;TEA029744.1_gene;TEA002099.1_gene;TEA028494.1_gene;TEA012326.1_gene;TEA006871.1_gene;TEA013360.1_gene;TEA026197.1_gene;TEA021323.1_gene;TEA011438.1_gene;TEA005146.1_gene;TEA025706.1_gene;TEA00018…
MSTRG.27951.2	TEA030309.1_gene;TEA016080.1_gene;TEA024405.1_gene
MSTRG.23025.1	TEA029693.1_gene
MSTRG.97983.1	TEA007317.1_gene;TEA007851.1_gene;TEA015754.1_gene;TEA027389.1_gene;TEA027382.1_gene;TEA003795.1_gene;TEA006438.1_gene;TEA033848.1_gene;TEA011585.1_gene;TEA011922.1_gene;TEA026707.1_gene
MSTRG.127667.1	TEA010374.1_gene;TEA017596.1_gene
MSTRG.10519.2	TEA028604.1_gene
MSTRG.65838.1	TEA018148.1_gene
MSTRG.45611.1	TEA015057.1_gene;TEA015073.1_gene;TEA021604.1_gene;TEA019757.1_gene;TEA014924.1_gene;TEA010960.1_gene
MSTRG.52201.1	TEA016584.1_gene;TEA026469.1_gene
MSTRG.143708.1	TEA005889.1_gene
MSTRG.85719.1	TEA023485.1_gene;TEA028876.1_gene;TEA025647.1_gene;TEA016154.1_gene
MSTRG.128875.1	TEA013137.1_gene;TEA009546.1_gene
MSTRG.9402.1	TEA033661.1_gene
MSTRG.109916.4	TEA015149.1_gene
MSTRG.112921.1	TEA016977.1_gene
MSTRG.86405.1	TEA021903.1_gene;TEA027764.1_gene;TEA030707.1_gene;TEA032629.1_gene;TEA008618.1_gene;TEA018072.1_gene;TEA023038.1_gene;TEA010521.1_gene;TEA026523.1_gene;TEA018532.1_gene;TEA015685.1_gene;TEA017780.1_gene;TEA019234.1_gene;TEA019048.1_gene;TEA032094.1_gene;TEA011974.1_gene
MSTRG.18381.1	TEA028284.1_gene
MSTRG.150730.5	TEA027795.1_gene
MSTRG.80287.2	TEA028604.1_gene;TEA032906.1_gene;TEA020835.1_gene;TEA019784.1_gene;TEA006094.1_gene;TEA001611.1_gene;TEA033370.1_gene;TEA033451.1_gene;TEA009644.1_gene
MSTRG.155015.2	TEA019609.1_gene;TEA019678.1_gene;TEA002565.1_gene;TEA023524.1_gene;TEA012195.1_gene;TEA006428.1_gene
MSTRG.58400.1	TEA018805.1_gene;TEA021504.1_gene;TEA025313.1_gene;TEA024281.1_gene;TEA016394.1_gene;TEA032924.1_gene;TEA008878.1_gene;TEA020611.1_gene;TEA018270.1_gene;TEA002690.1_gene;TEA019525.1_gene;TEA031343.1_gene;TEA033110.1_gene;TEA034026.1_gene;TEA011930.1_gene;TEA004212.1_gene;TEA025647.1_gene;TEA008033.1_gene;TEA005093.1_gene;TEA006218.1_gene;TEA033496.1_gene;TEA017305.1_gene;TEA006299.1_gene;TEA00483…
MSTRG.105282.1	TEA018508.1_gene;TEA018220.1_gene;TEA011894.1_gene;TEA028604.1_gene;TEA025877.1_gene;TEA008392.1_gene;TEA020835.1_gene;TEA011198.1_gene;TEA010263.1_gene;TEA013549.1_gene;TEA024384.1_gene;TEA021075.1_gene;TEA011187.1_gene;TEA024263.1_gene;TEA031948.1_gene;TEA033451.1_gene
MSTRG.82128.1	TEA016642.1_gene
MSTRG.52404.2	TEA023485.1_gene;TEA025647.1_gene;TEA016154.1_gene
MSTRG.117449.1	TEA026403.1_gene;TEA012374.1_gene;TEA018027.1_gene;TEA016538.1_gene;TEA001399.1_gene;TEA001391.1_gene;TEA017187.1_gene;TEA029791.1_gene;TEA005155.1_gene;TEA026125.1_gene;TEA031093.1_gene;TEA030083.1_gene;TEA024338.1_gene;TEA000181.1_gene
MSTRG.103071.1	TEA016656.1_gene;TEA001959.1_gene;TEA016649.1_gene;TEA022545.1_gene;TEA013517.1_gene
MSTRG.121472.20	TEA027795.1_gene;TEA022783.1_gene
MSTRG.74122.1	TEA018670.1_gene
MSTRG.55600.1	TEA007621.1_gene;TEA031202.1_gene
MSTRG.45267.1	TEA026726.1_gene;TEA020475.1_gene;TEA021326.1_gene
MSTRG.72857.1	TEA020950.1_gene
MSTRG.43181.1	TEA013970.1_gene
MSTRG.121472.8	TEA027795.1_gene;TEA022783.1_gene
MSTRG.89240.1	TEA003533.1_gene;TEA006089.1_gene;TEA032396.1_gene
MSTRG.149881.2	TEA015112.1_gene;TEA027917.1_gene;TEA020563.1_gene;TEA002467.1_gene;TEA027316.1_gene;TEA031405.1_gene;TEA029689.1_gene;TEA022191.1_gene;TEA009213.1_gene;TEA028976.1_gene;TEA030547.1_gene;TEA003395.1_gene;TEA015515.1_gene;TEA008227.1_gene;TEA023748.1_gene;TEA025046.1_gene;TEA025894.1_gene
MSTRG.102559.1	TEA033451.1_gene;TEA020835.1_gene;TEA019784.1_gene;TEA010773.1_gene;TEA003157.1_gene;TEA032906.1_gene
MSTRG.108553.1	TEA010091.1_gene
MSTRG.100445.13	TEA028945.1_gene
MSTRG.52215.1	TEA021137.1_gene;TEA029881.1_gene;TEA010345.1_gene;TEA010364.1_gene;TEA010346.1_gene;TEA024547.1_gene;TEA023485.1_gene;TEA025647.1_gene;TEA016154.1_gene
MSTRG.21387.1	TEA001379.1_gene;TEA011865.1_gene;TEA032338.1_gene;TEA004199.1_gene;TEA033011.1_gene;TEA022614.1_gene;TEA011882.1_gene;TEA011877.1_gene;TEA026200.1_gene
MSTRG.85788.1	TEA029886.1_gene
MSTRG.48550.1	TEA021343.1_gene;TEA027929.1_gene;TEA028814.1_gene;TEA015974.1_gene;TEA003761.1_gene;TEA004299.1_gene;TEA006326.1_gene;TEA005766.1_gene
MSTRG.9744.1	TEA006899.1_gene;TEA029167.1_gene;TEA028294.1_gene;TEA017351.1_gene;TEA007317.1_gene;TEA028595.1_gene;TEA008506.1_gene;TEA023826.1_gene;TEA015517.1_gene;TEA011759.1_gene;TEA020949.1_gene;TEA018719.1_gene;TEA011448.1_gene;TEA030505.1_gene;TEA027018.1_gene;TEA020409.1_gene;TEA027452.1_gene;TEA025726.1_gene;TEA006444.1_gene;TEA004625.1_gene;TEA010948.1_gene;TEA000449.1_gene;TEA030895.1_gene;TEA01764…
MSTRG.74128.1	TEA009792.1_gene;TEA016154.1_gene;TEA025647.1_gene
MSTRG.153953.1	TEA023756.1_gene;TEA020271.1_gene;TEA023600.1_gene;TEA028416.1_gene;TEA009300.1_gene;TEA013023.1_gene;TEA028409.1_gene;TEA011468.1_gene;TEA033719.1_gene;TEA017551.1_gene;TEA005504.1_gene;TEA007888.1_gene;TEA014530.1_gene;TEA019567.1_gene;TEA012034.1_gene;TEA022079.1_gene;TEA006271.1_gene;TEA028512.1_gene;TEA033178.1_gene;TEA032760.1_gene;TEA026024.1_gene
MSTRG.24201.1	TEA028766.1_gene;TEA019254.1_gene;TEA027316.1_gene;TEA002467.1_gene;TEA004935.1_gene;TEA022484.1_gene;TEA018775.1_gene;TEA020563.1_gene;TEA029689.1_gene;TEA022079.1_gene;TEA016231.1_gene;TEA022191.1_gene;TEA004216.1_gene;TEA009213.1_gene;TEA015935.1_gene;TEA021549.1_gene;TEA004518.1_gene;TEA014763.1_gene;TEA015112.1_gene;TEA027917.1_gene;TEA024014.1_gene;TEA025982.1_gene;TEA000117.1_gene;TEA00177…
MSTRG.41735.1	TEA013438.1_gene;TEA024307.1_gene;TEA024137.1_gene;TEA010264.1_gene;TEA019819.1_gene;TEA013435.1_gene;TEA023485.1_gene;TEA025647.1_gene;TEA021584.1_gene;TEA016154.1_gene
MSTRG.63352.2	TEA018220.1_gene;TEA018508.1_gene;TEA025877.1_gene;TEA008392.1_gene;TEA028604.1_gene;TEA011894.1_gene;TEA011187.1_gene;TEA011828.1_gene;TEA023759.1_gene;TEA013975.1_gene;TEA017172.1_gene;TEA004158.1_gene;TEA032906.1_gene;TEA020835.1_gene;TEA011198.1_gene;TEA019784.1_gene;TEA003157.1_gene;TEA018462.1_gene;TEA002926.1_gene
MSTRG.143559.1	TEA024263.1_gene
MSTRG.26482.1	TEA031065.1_gene
MSTRG.142082.1	TEA011926.1_gene
MSTRG.135568.1	TEA006523.1_gene;TEA023485.1_gene;TEA016154.1_gene;TEA025647.1_gene
MSTRG.40173.1	TEA023485.1_gene;TEA025647.1_gene;TEA016154.1_gene
MSTRG.31273.1	TEA018970.1_gene
MSTRG.109012.1	TEA025703.1_gene
MSTRG.31219.1	TEA021833.1_gene;TEA030131.1_gene;TEA019730.1_gene
MSTRG.66706.2	TEA015112.1_gene;TEA027917.1_gene;TEA019254.1_gene;TEA000117.1_gene;TEA029689.1_gene;TEA016231.1_gene;TEA027316.1_gene;TEA017033.1_gene;TEA031405.1_gene;TEA031458.1_gene;TEA007797.1_gene
MSTRG.135813.1	TEA013803.1_gene;TEA032487.1_gene
MSTRG.134076.1	TEA023259.1_gene
MSTRG.143475.1	TEA019754.1_gene;TEA003810.1_gene;TEA013311.1_gene;TEA003963.1_gene
MSTRG.84260.1	TEA001381.1_gene
MSTRG.31189.1	TEA015534.1_gene;TEA024220.1_gene;TEA032032.1_gene;TEA025947.1_gene;TEA033746.1_gene;TEA005037.1_gene;TEA002788.1_gene;TEA028240.1_gene;TEA002357.1_gene;TEA016347.1_gene;TEA013939.1_gene;TEA025296.1_gene
MSTRG.1605.1	TEA004199.1_gene;TEA020791.1_gene;TEA007489.1_gene;TEA006823.1_gene;TEA006719.1_gene;TEA002104.1_gene;TEA011312.1_gene
MSTRG.91587.1	TEA027025.1_gene;TEA020563.1_gene;TEA021647.1_gene;TEA029058.1_gene
MSTRG.104552.1	TEA002275.1_gene;TEA019596.1_gene;TEA006807.1_gene;TEA031818.1_gene;TEA015565.1_gene;TEA033732.1_gene;TEA028596.1_gene;TEA017001.1_gene;TEA017134.1_gene;TEA005588.1_gene;TEA023575.1_gene
MSTRG.134713.2	TEA017677.1_gene;TEA030632.1_gene;TEA027807.1_gene;TEA013125.1_gene;TEA024384.1_gene;TEA030444.1_gene;TEA002521.1_gene;TEA022484.1_gene;TEA026405.1_gene;TEA013456.1_gene;TEA008868.1_gene;TEA021348.1_gene;TEA020003.1_gene;TEA029027.1_gene;TEA023957.1_gene;TEA020379.1_gene;TEA014620.1_gene;TEA029843.1_gene;TEA022195.1_gene;TEA012154.1_gene;TEA010268.1_gene;TEA030902.1_gene;TEA025279.1_gene;TEA03265…
MSTRG.54494.3	TEA033451.1_gene
MSTRG.32355.1	TEA028604.1_gene
MSTRG.19550.1	TEA027827.1_gene;TEA010956.1_gene
MSTRG.4837.9	TEA027795.1_gene;TEA009712.1_gene
MSTRG.117448.1	TEA026403.1_gene;TEA016549.1_gene;TEA029791.1_gene;TEA001391.1_gene;TEA001399.1_gene;TEA016538.1_gene;TEA018027.1_gene;TEA012374.1_gene;TEA026125.1_gene;TEA031093.1_gene;TEA027602.1_gene;TEA024528.1_gene;TEA015566.1_gene;TEA006860.1_gene;TEA006514.1_gene;TEA004524.1_gene;TEA005155.1_gene;TEA032130.1_gene;TEA028063.1_gene;TEA015070.1_gene;TEA018212.1_gene;TEA000537.1_gene;TEA003261.1_gene;TEA01023…
MSTRG.105486.1	TEA000665.1_gene;TEA031769.1_gene;TEA003702.1_gene;TEA023048.1_gene;TEA016396.1_gene;TEA017203.1_gene;TEA000652.1_gene;TEA020371.1_gene;TEA026944.1_gene;TEA022609.1_gene;TEA033285.1_gene;TEA016389.1_gene;TEA031771.1_gene;TEA021628.1_gene;TEA025023.1_gene;TEA026945.1_gene;TEA021624.1_gene;TEA018129.1_gene;TEA023713.1_gene;TEA002165.1_gene;TEA005510.1_gene;TEA006046.1_gene;TEA021805.1_gene;TEA01427…
MSTRG.81706.24	TEA032972.1_gene;TEA008062.1_gene;TEA004634.1_gene;TEA004689.1_gene;TEA009506.1_gene;TEA019531.1_gene;TEA033226.1_gene;TEA013294.1_gene;TEA027768.1_gene;TEA010397.1_gene;TEA010378.1_gene;TEA015941.1_gene;TEA018522.1_gene;TEA018861.1_gene;TEA013202.1_gene;TEA004262.1_gene;TEA030183.1_gene;TEA017039.1_gene;TEA032340.1_gene;TEA000131.1_gene;TEA012936.1_gene;TEA015551.1_gene;TEA033279.1_gene;TEA02156…
MSTRG.122653.1	TEA013573.1_gene
MSTRG.149697.3	TEA015719.1_gene;TEA016154.1_gene
MSTRG.46048.3	TEA004240.1_gene
MSTRG.98060.2	TEA015245.1_gene;TEA025433.1_gene;TEA015257.1_gene;TEA020519.1_gene;TEA015270.1_gene;TEA025429.1_gene;TEA003194.1_gene;TEA024768.1_gene
MSTRG.135733.1	TEA016349.1_gene;TEA028886.1_gene;TEA033382.1_gene;TEA013687.1_gene;TEA018324.1_gene
MSTRG.98292.1	TEA033415.1_gene;TEA012457.1_gene
MSTRG.142499.1	TEA016198.1_gene
MSTRG.41458.3	TEA008223.1_gene;TEA017305.1_gene;TEA033496.1_gene;TEA031343.1_gene;TEA033110.1_gene;TEA017354.1_gene;TEA031183.1_gene;TEA001194.1_gene;TEA020611.1_gene;TEA027508.1_gene;TEA028803.1_gene;TEA015684.1_gene;TEA019988.1_gene;TEA021504.1_gene;TEA018270.1_gene;TEA002690.1_gene;TEA019525.1_gene;TEA014446.1_gene;TEA024281.1_gene;TEA016394.1_gene;TEA034026.1_gene;TEA024608.1_gene;TEA011930.1_gene;TEA00421…
MSTRG.38856.1	TEA022815.1_gene;TEA024219.1_gene;TEA025585.1_gene;TEA001566.1_gene;TEA032738.1_gene
MSTRG.42215.3	TEA001774.1_gene;TEA016154.1_gene;TEA025647.1_gene
MSTRG.74256.1	TEA009812.1_gene;TEA032993.1_gene;TEA009822.1_gene
MSTRG.103788.1	TEA017340.1_gene;TEA029222.1_gene;TEA000276.1_gene;TEA005676.1_gene;TEA016236.1_gene
MSTRG.17881.1	TEA023986.1_gene
MSTRG.26249.1	TEA018557.1_gene;TEA008909.1_gene;TEA023331.1_gene;TEA012541.1_gene
MSTRG.136330.1	TEA003037.1_gene
MSTRG.120285.1	TEA009712.1_gene;TEA004240.1_gene
MSTRG.41639.1	TEA000156.1_gene;TEA024727.1_gene;TEA004126.1_gene;TEA005431.1_gene;TEA013818.1_gene;TEA006778.1_gene;TEA005361.1_gene;TEA022856.1_gene;TEA020383.1_gene;TEA025841.1_gene;TEA030182.1_gene;TEA017443.1_gene;TEA018504.1_gene;TEA018985.1_gene;TEA015251.1_gene;TEA010962.1_gene;TEA023047.1_gene;TEA032878.1_gene;TEA016936.1_gene;TEA016934.1_gene;TEA001164.1_gene;TEA026995.1_gene
MSTRG.154867.1	TEA016655.1_gene;TEA021182.1_gene;TEA016503.1_gene;TEA020877.1_gene;TEA019209.1_gene;TEA021190.1_gene;TEA000936.1_gene;TEA004512.1_gene
MSTRG.76340.1	TEA009671.1_gene
MSTRG.7886.2	TEA024242.1_gene;TEA028273.1_gene;TEA002272.1_gene;TEA019742.1_gene;TEA012762.1_gene;TEA014720.1_gene;TEA021313.1_gene;TEA002456.1_gene;TEA009253.1_gene;TEA025952.1_gene;TEA018551.1_gene;TEA033855.1_gene;TEA028680.1_gene;TEA013064.1_gene;TEA028796.1_gene;TEA006858.1_gene;TEA024771.1_gene;TEA017969.1_gene;TEA010673.1_gene;TEA012320.1_gene;TEA025378.1_gene;TEA011342.1_gene;TEA029100.1_gene;TEA00521…
MSTRG.17269.3	TEA004240.1_gene
MSTRG.10990.1	TEA027950.1_gene;TEA027938.1_gene
MSTRG.9618.3	TEA023977.1_gene;TEA016154.1_gene;TEA023485.1_gene;TEA025647.1_gene;TEA021584.1_gene;TEA004895.1_gene;TEA000250.1_gene;TEA022757.1_gene;TEA024571.1_gene;TEA015275.1_gene;TEA015241.1_gene;TEA024674.1_gene;TEA033456.1_gene
MSTRG.122623.2	TEA031575.1_gene;TEA004749.1_gene;TEA023334.1_gene
MSTRG.150730.19	TEA027795.1_gene
MSTRG.49353.1	TEA022755.1_gene;TEA010435.1_gene
MSTRG.14096.2	TEA017337.1_gene
MSTRG.63954.1	TEA026549.1_gene;TEA022645.1_gene
MSTRG.145316.11	TEA027795.1_gene;TEA022783.1_gene
MSTRG.116456.1	TEA000458.1_gene;TEA018772.1_gene
MSTRG.29446.3	TEA020715.1_gene
MSTRG.67081.1	TEA027316.1_gene;TEA000117.1_gene;TEA008009.1_gene;TEA025410.1_gene;TEA025394.1_gene
MSTRG.24965.1	TEA004240.1_gene
MSTRG.121815.1	TEA010404.1_gene;TEA005089.1_gene;TEA024537.1_gene;TEA025731.1_gene;TEA027051.1_gene;TEA029847.1_gene
MSTRG.25405.4	TEA028975.1_gene
MSTRG.130350.1	TEA019821.1_gene;TEA031821.1_gene;TEA029481.1_gene;TEA026762.1_gene;TEA005151.1_gene;TEA013232.1_gene;TEA031748.1_gene;TEA003046.1_gene
MSTRG.126888.1	TEA011108.1_gene
MSTRG.71321.2	TEA015112.1_gene;TEA027917.1_gene;TEA020563.1_gene;TEA002467.1_gene;TEA019254.1_gene;TEA028976.1_gene;TEA030547.1_gene
MSTRG.123417.2	TEA016897.1_gene;TEA007205.1_gene;TEA006298.1_gene
MSTRG.83253.1	TEA016668.1_gene;TEA023928.1_gene
MSTRG.17523.1	TEA025647.1_gene;TEA021584.1_gene;TEA023485.1_gene;TEA016154.1_gene
MSTRG.52687.1	TEA027047.1_gene
MSTRG.22964.1	TEA029810.1_gene;TEA003766.1_gene;TEA028228.1_gene;TEA010362.1_gene;TEA022825.1_gene;TEA020611.1_gene;TEA030200.1_gene;TEA027508.1_gene;TEA001683.1_gene;TEA033496.1_gene;TEA005473.1_gene;TEA015684.1_gene;TEA003192.1_gene;TEA018270.1_gene;TEA001748.1_gene;TEA002343.1_gene;TEA031343.1_gene;TEA004120.1_gene;TEA009899.1_gene;TEA025342.1_gene;TEA007779.1_gene;TEA005928.1_gene;TEA009813.1_gene;TEA01860…
MSTRG.21056.1	TEA023600.1_gene;TEA020271.1_gene;TEA023756.1_gene;TEA009300.1_gene;TEA005504.1_gene;TEA017551.1_gene;TEA014530.1_gene;TEA033719.1_gene;TEA028409.1_gene;TEA007888.1_gene;TEA006271.1_gene;TEA028512.1_gene;TEA019567.1_gene;TEA026024.1_gene
MSTRG.54771.3	TEA033801.1_gene
MSTRG.86273.1	TEA014474.1_gene
MSTRG.113772.5	TEA005043.1_gene
MSTRG.53268.2	TEA019277.1_gene
MSTRG.68326.2	TEA018099.1_gene;TEA014863.1_gene;TEA006784.1_gene
MSTRG.18803.1	TEA010428.1_gene;TEA024281.1_gene;TEA016394.1_gene;TEA029589.1_gene;TEA021504.1_gene;TEA021492.1_gene;TEA002690.1_gene;TEA011029.1_gene;TEA033110.1_gene;TEA025313.1_gene;TEA031183.1_gene;TEA025647.1_gene;TEA032924.1_gene;TEA004833.1_gene;TEA008878.1_gene;TEA033496.1_gene;TEA015684.1_gene;TEA003192.1_gene;TEA019988.1_gene;TEA018270.1_gene;TEA019525.1_gene;TEA031343.1_gene;TEA033134.1_gene;TEA01444…
MSTRG.83812.1	TEA025880.1_gene
MSTRG.76752.1	TEA015394.1_gene;TEA015390.1_gene
MSTRG.123894.1	TEA007693.1_gene;TEA007560.1_gene
MSTRG.137259.6	TEA025348.1_gene;TEA025254.1_gene
MSTRG.31043.1	TEA001815.1_gene;TEA001807.1_gene;TEA025846.1_gene;TEA002477.1_gene
MSTRG.21892.1	TEA023485.1_gene;TEA025647.1_gene;TEA016154.1_gene
MSTRG.41377.8	TEA020141.1_gene
MSTRG.136827.6	TEA030681.1_gene;TEA010787.1_gene
MSTRG.87018.2	TEA028976.1_gene;TEA027949.1_gene
MSTRG.145320.22	TEA004240.1_gene
MSTRG.140846.3	TEA000351.1_gene;TEA016804.1_gene;TEA033258.1_gene;TEA000522.1_gene;TEA020652.1_gene;TEA032746.1_gene;TEA020647.1_gene;TEA002116.1_gene;TEA007059.1_gene;TEA025648.1_gene
MSTRG.108567.1	TEA000677.1_gene;TEA005591.1_gene
MSTRG.7199.1	TEA002793.1_gene
MSTRG.82473.4	TEA022783.1_gene;TEA027795.1_gene
MSTRG.48163.3	TEA020653.1_gene;TEA014446.1_gene;TEA023485.1_gene;TEA025647.1_gene;TEA016154.1_gene
MSTRG.142270.1	TEA027795.1_gene
MSTRG.115976.1	TEA016220.1_gene;TEA011300.1_gene;TEA010121.1_gene;TEA025968.1_gene
MSTRG.100189.2	TEA001433.1_gene
MSTRG.67799.3	TEA017916.1_gene;TEA025647.1_gene;TEA016154.1_gene
MSTRG.110115.6	TEA024281.1_gene;TEA021504.1_gene;TEA016394.1_gene;TEA025647.1_gene;TEA004212.1_gene;TEA021584.1_gene;TEA027508.1_gene;TEA019551.1_gene;TEA014446.1_gene;TEA007779.1_gene;TEA023485.1_gene;TEA016154.1_gene
MSTRG.22630.1	TEA018220.1_gene;TEA008392.1_gene;TEA018508.1_gene;TEA025877.1_gene
MSTRG.6922.1	TEA028742.1_gene;TEA003235.1_gene;TEA018900.1_gene;TEA003234.1_gene;TEA023163.1_gene;TEA032922.1_gene;TEA002722.1_gene;TEA001703.1_gene
MSTRG.121724.2	TEA000877.1_gene;TEA023074.1_gene;TEA016349.1_gene;TEA014219.1_gene
MSTRG.62848.1	TEA015508.1_gene
MSTRG.122553.1	TEA020087.1_gene;TEA025659.1_gene;TEA003418.1_gene;TEA033290.1_gene;TEA024460.1_gene;TEA024751.1_gene;TEA010381.1_gene;TEA022470.1_gene;TEA014101.1_gene;TEA033094.1_gene
MSTRG.38590.1	TEA010581.1_gene
MSTRG.41999.1	TEA019234.1_gene
MSTRG.103929.2	TEA012330.1_gene;TEA005208.1_gene;TEA013587.1_gene;TEA025331.1_gene;TEA004162.1_gene;TEA032218.1_gene;TEA011616.1_gene;TEA011764.1_gene;TEA011221.1_gene;TEA019393.1_gene;TEA015305.1_gene;TEA005150.1_gene;TEA010592.1_gene;TEA014682.1_gene;TEA012875.1_gene;TEA007856.1_gene;TEA022703.1_gene;TEA008385.1_gene;TEA010263.1_gene;TEA015961.1_gene;TEA028824.1_gene;TEA002726.1_gene;TEA029009.1_gene;TEA01119…
MSTRG.101406.1	TEA022113.1_gene;TEA017558.1_gene;TEA018557.1_gene;TEA009443.1_gene
MSTRG.155305.2	TEA033581.1_gene;TEA003094.1_gene;TEA012987.1_gene;TEA002017.1_gene
MSTRG.139242.1	TEA027202.1_gene;TEA027208.1_gene
MSTRG.121738.1	TEA027795.1_gene;TEA003479.1_gene;TEA022783.1_gene;TEA009712.1_gene
MSTRG.124084.9	TEA007520.1_gene;TEA026628.1_gene;TEA019234.1_gene
MSTRG.81062.1	TEA011530.1_gene;TEA017117.1_gene;TEA007421.1_gene;TEA012429.1_gene;TEA032280.1_gene;TEA033456.1_gene;TEA020876.1_gene
MSTRG.32939.1	TEA021088.1_gene;TEA004663.1_gene;TEA005317.1_gene;TEA003232.1_gene;TEA005259.1_gene
MSTRG.43489.3	TEA032205.1_gene;TEA010690.1_gene
MSTRG.29422.1	TEA016154.1_gene;TEA023485.1_gene;TEA025647.1_gene
MSTRG.109081.3	TEA015827.1_gene
MSTRG.43915.1	TEA019567.1_gene;TEA003277.1_gene;TEA005543.1_gene;TEA033178.1_gene;TEA009300.1_gene;TEA023756.1_gene;TEA029870.1_gene;TEA020271.1_gene;TEA028409.1_gene;TEA004464.1_gene;TEA001678.1_gene;TEA028416.1_gene;TEA023600.1_gene;TEA023661.1_gene;TEA005504.1_gene;TEA006271.1_gene;TEA007888.1_gene;TEA030631.1_gene;TEA004463.1_gene;TEA020202.1_gene;TEA000631.1_gene;TEA020073.1_gene;TEA012315.1_gene;TEA03371…
MSTRG.77342.1	TEA005637.1_gene
MSTRG.19403.1	TEA010263.1_gene;TEA028824.1_gene;TEA011198.1_gene;TEA005208.1_gene;TEA015961.1_gene;TEA014682.1_gene;TEA029009.1_gene;TEA025877.1_gene;TEA011187.1_gene;TEA004463.1_gene;TEA011894.1_gene;TEA012330.1_gene;TEA018508.1_gene;TEA008392.1_gene;TEA011828.1_gene;TEA000304.1_gene;TEA023759.1_gene;TEA018220.1_gene;TEA017172.1_gene;TEA012875.1_gene
MSTRG.94348.1	TEA016288.1_gene
MSTRG.55774.1	TEA021584.1_gene;TEA023485.1_gene;TEA025647.1_gene;TEA016154.1_gene
MSTRG.56378.2	TEA028725.1_gene
MSTRG.148931.1	TEA020510.1_gene
MSTRG.15383.4	TEA018508.1_gene;TEA018220.1_gene;TEA023759.1_gene;TEA032906.1_gene;TEA011894.1_gene;TEA028604.1_gene;TEA008392.1_gene;TEA011828.1_gene;TEA013975.1_gene;TEA011187.1_gene;TEA004158.1_gene;TEA017172.1_gene;TEA025877.1_gene;TEA020835.1_gene;TEA019784.1_gene
MSTRG.152495.2	TEA023338.1_gene;TEA025647.1_gene;TEA021584.1_gene;TEA023485.1_gene;TEA016154.1_gene
MSTRG.42605.1	TEA004240.1_gene
MSTRG.20787.10	TEA027316.1_gene
MSTRG.22966.1	TEA000877.1_gene;TEA016349.1_gene;TEA023074.1_gene;TEA014219.1_gene;TEA014056.1_gene
MSTRG.120284.28	TEA004240.1_gene;TEA009712.1_gene
MSTRG.151316.13	TEA016154.1_gene
MSTRG.102358.1	TEA021584.1_gene;TEA025647.1_gene;TEA016154.1_gene;TEA023485.1_gene
MSTRG.41465.1	TEA026780.1_gene
MSTRG.85657.1	TEA025647.1_gene;TEA023485.1_gene;TEA016154.1_gene
MSTRG.15383.1	TEA018508.1_gene;TEA018220.1_gene;TEA032906.1_gene;TEA023759.1_gene;TEA011828.1_gene;TEA011894.1_gene;TEA013975.1_gene;TEA008392.1_gene;TEA011187.1_gene;TEA004158.1_gene;TEA017172.1_gene;TEA010263.1_gene;TEA025877.1_gene;TEA028604.1_gene;TEA020835.1_gene;TEA019784.1_gene
MSTRG.117275.1	TEA007163.1_gene
MSTRG.9209.1	TEA000877.1_gene;TEA023074.1_gene;TEA016349.1_gene;TEA014219.1_gene
MSTRG.50868.1	TEA008655.1_gene;TEA031937.1_gene;TEA033262.1_gene;TEA002018.1_gene;TEA033461.1_gene;TEA027807.1_gene;TEA019757.1_gene;TEA022099.1_gene;TEA007584.1_gene;TEA002456.1_gene;TEA024074.1_gene;TEA025412.1_gene;TEA009125.1_gene;TEA016257.1_gene;TEA014458.1_gene;TEA003310.1_gene;TEA028796.1_gene;TEA000400.1_gene;TEA019012.1_gene;TEA015133.1_gene;TEA024005.1_gene;TEA026619.1_gene;TEA022137.1_gene;TEA02471…
MSTRG.125137.1	TEA025647.1_gene;TEA021584.1_gene;TEA023485.1_gene;TEA016154.1_gene
MSTRG.121526.6	TEA004240.1_gene
MSTRG.39583.2	TEA006026.1_gene
MSTRG.103603.1	TEA032906.1_gene;TEA018220.1_gene;TEA018508.1_gene;TEA028604.1_gene;TEA025877.1_gene;TEA008392.1_gene;TEA011894.1_gene;TEA011187.1_gene;TEA011828.1_gene;TEA010263.1_gene;TEA005208.1_gene;TEA013975.1_gene;TEA023759.1_gene;TEA017172.1_gene;TEA004158.1_gene
MSTRG.110007.1	TEA013190.1_gene
MSTRG.121526.9	TEA004240.1_gene
MSTRG.91586.2	TEA002343.1_gene;TEA007794.1_gene;TEA002958.1_gene;TEA028680.1_gene;TEA009253.1_gene;TEA028796.1_gene;TEA018551.1_gene;TEA024771.1_gene;TEA021313.1_gene;TEA017946.1_gene;TEA017944.1_gene;TEA016023.1_gene;TEA012643.1_gene;TEA015960.1_gene;TEA024719.1_gene;TEA024718.1_gene;TEA027807.1_gene;TEA001871.1_gene;TEA017562.1_gene;TEA010673.1_gene;TEA022099.1_gene;TEA005570.1_gene;TEA004336.1_gene;TEA03040…
MSTRG.15532.2	TEA025647.1_gene;TEA027508.1_gene;TEA003403.1_gene;TEA016154.1_gene
MSTRG.56185.2	TEA006020.1_gene;TEA003437.1_gene
MSTRG.121724.1	TEA000877.1_gene;TEA016349.1_gene;TEA014219.1_gene;TEA023074.1_gene
MSTRG.151681.1	TEA006381.1_gene
MSTRG.31172.1	TEA027731.1_gene;TEA001726.1_gene;TEA028308.1_gene;TEA025911.1_gene;TEA011786.1_gene;TEA000548.1_gene;TEA023346.1_gene
MSTRG.129787.1	TEA016529.1_gene;TEA020379.1_gene;TEA011857.1_gene;TEA022186.1_gene;TEA016807.1_gene;TEA011433.1_gene;TEA011119.1_gene;TEA012649.1_gene;TEA000178.1_gene;TEA025219.1_gene;TEA009417.1_gene;TEA000752.1_gene;TEA029122.1_gene;TEA024861.1_gene;TEA014149.1_gene;TEA032201.1_gene;TEA014458.1_gene;TEA009527.1_gene;TEA023386.1_gene;TEA006962.1_gene;TEA030755.1_gene;TEA033823.1_gene;TEA009194.1_gene
MSTRG.111550.1	TEA005928.1_gene;TEA012995.1_gene;TEA029810.1_gene;TEA016154.1_gene;TEA025647.1_gene;TEA020517.1_gene;TEA004846.1_gene
MSTRG.26956.1	TEA009482.1_gene
MSTRG.4837.22	TEA027795.1_gene
MSTRG.4209.1	TEA022099.1_gene;TEA019469.1_gene;TEA009850.1_gene;TEA023170.1_gene;TEA002926.1_gene;TEA029744.1_gene;TEA018901.1_gene;TEA031059.1_gene;TEA010193.1_gene;TEA010386.1_gene;TEA030397.1_gene;TEA012448.1_gene;TEA021154.1_gene;TEA026307.1_gene;TEA003474.1_gene;TEA017450.1_gene;TEA003961.1_gene;TEA000594.1_gene;TEA018822.1_gene;TEA003786.1_gene;TEA019800.1_gene;TEA016790.1_gene;TEA004312.1_gene;TEA03076…
MSTRG.38378.1	TEA009712.1_gene;TEA004240.1_gene
MSTRG.81489.10	TEA029391.1_gene
MSTRG.145316.47	TEA027795.1_gene;TEA003479.1_gene;TEA022783.1_gene
MSTRG.129995.3	TEA023485.1_gene;TEA025647.1_gene;TEA021584.1_gene;TEA016154.1_gene
MSTRG.11431.1	TEA020015.1_gene
MSTRG.112391.5	TEA018220.1_gene;TEA018508.1_gene;TEA028604.1_gene;TEA011894.1_gene;TEA023759.1_gene;TEA025877.1_gene;TEA008392.1_gene;TEA011187.1_gene;TEA011828.1_gene;TEA004158.1_gene;TEA017172.1_gene;TEA013975.1_gene;TEA020835.1_gene;TEA011198.1_gene
MSTRG.138749.1	TEA021999.1_gene;TEA022031.1_gene;TEA003087.1_gene;TEA004518.1_gene;TEA032577.1_gene;TEA031396.1_gene;TEA020379.1_gene;TEA033176.1_gene;TEA013904.1_gene;TEA023592.1_gene;TEA025894.1_gene;TEA006175.1_gene;TEA006033.1_gene;TEA019254.1_gene;TEA032445.1_gene;TEA014702.1_gene;TEA005824.1_gene;TEA020704.1_gene;TEA014551.1_gene;TEA026655.1_gene;TEA021074.1_gene;TEA020998.1_gene;TEA009194.1_gene;TEA01511…
MSTRG.5049.1	TEA013097.1_gene;TEA031851.1_gene
MSTRG.142288.1	TEA032906.1_gene;TEA028604.1_gene
MSTRG.127742.1	TEA027067.1_gene
MSTRG.30955.1	TEA006412.1_gene;TEA006396.1_gene
MSTRG.29875.1	TEA026121.1_gene;TEA028929.1_gene
MSTRG.40849.5	TEA000877.1_gene;TEA023074.1_gene;TEA016349.1_gene;TEA014219.1_gene
MSTRG.59391.1	TEA018057.1_gene;TEA018059.1_gene;TEA027741.1_gene;TEA018274.1_gene
MSTRG.37715.1	TEA030114.1_gene;TEA024946.1_gene;TEA030107.1_gene;TEA024974.1_gene;TEA026720.1_gene;TEA026724.1_gene;TEA019055.1_gene;TEA009993.1_gene;TEA001585.1_gene;TEA002438.1_gene;TEA016815.1_gene;TEA020330.1_gene;TEA009697.1_gene;TEA032630.1_gene;TEA027090.1_gene;TEA018233.1_gene;TEA002436.1_gene;TEA027617.1_gene;TEA002427.1_gene;TEA010709.1_gene;TEA005159.1_gene;TEA020359.1_gene;TEA024107.1_gene;TEA00243…
MSTRG.21023.1	TEA003878.1_gene
MSTRG.61344.9	TEA013185.1_gene
MSTRG.45008.1	TEA016058.1_gene
MSTRG.112620.1	TEA023296.1_gene;TEA014838.1_gene;TEA033070.1_gene;TEA026961.1_gene;TEA025351.1_gene;TEA010743.1_gene;TEA011048.1_gene;TEA030498.1_gene;TEA014898.1_gene;TEA002814.1_gene;TEA028888.1_gene;TEA016963.1_gene;TEA026345.1_gene;TEA025758.1_gene;TEA021160.1_gene;TEA033582.1_gene;TEA007078.1_gene;TEA021845.1_gene;TEA030707.1_gene;TEA006508.1_gene;TEA020009.1_gene;TEA002085.1_gene;TEA021026.1_gene;TEA01807…
MSTRG.58819.1	TEA005517.1_gene
MSTRG.28300.3	TEA022433.1_gene;TEA016303.1_gene
MSTRG.136043.8	TEA003479.1_gene;TEA027795.1_gene
MSTRG.5538.1	TEA018423.1_gene;TEA031025.1_gene;TEA010077.1_gene;TEA029903.1_gene;TEA003097.1_gene;TEA033051.1_gene;TEA032865.1_gene;TEA020420.1_gene
MSTRG.121478.1	TEA009712.1_gene;TEA004240.1_gene
MSTRG.141933.4	TEA004651.1_gene
MSTRG.10343.1	TEA020379.1_gene;TEA016529.1_gene;TEA022186.1_gene;TEA011119.1_gene;TEA011857.1_gene;TEA012649.1_gene;TEA025219.1_gene;TEA016807.1_gene;TEA000178.1_gene;TEA011433.1_gene;TEA029122.1_gene;TEA032201.1_gene;TEA009417.1_gene;TEA024861.1_gene;TEA014149.1_gene;TEA014458.1_gene;TEA000752.1_gene;TEA006962.1_gene;TEA023386.1_gene;TEA026022.1_gene;TEA018364.1_gene;TEA028364.1_gene;TEA009527.1_gene;TEA03382…
MSTRG.103787.2	TEA017340.1_gene
MSTRG.63177.1	TEA011894.1_gene;TEA018220.1_gene;TEA032906.1_gene;TEA020835.1_gene;TEA012423.1_gene;TEA006094.1_gene
MSTRG.120283.9	TEA027795.1_gene
MSTRG.145316.4	TEA027795.1_gene;TEA022783.1_gene
MSTRG.83581.2	TEA008138.1_gene
MSTRG.84529.1	TEA013415.1_gene
MSTRG.142268.1	TEA027795.1_gene;TEA009712.1_gene;TEA003479.1_gene;TEA022783.1_gene
MSTRG.50154.1	TEA023485.1_gene;TEA025647.1_gene;TEA016154.1_gene
MSTRG.98041.1	TEA017705.1_gene
MSTRG.83301.6	TEA027316.1_gene;TEA027917.1_gene;TEA000117.1_gene;TEA003087.1_gene
MSTRG.27533.1	TEA030360.1_gene
MSTRG.82473.19	TEA027795.1_gene;TEA022783.1_gene
MSTRG.138809.1	TEA025647.1_gene;TEA021584.1_gene;TEA023485.1_gene;TEA016154.1_gene
MSTRG.65071.1	TEA025647.1_gene;TEA031343.1_gene;TEA024608.1_gene;TEA016394.1_gene;TEA021504.1_gene;TEA004212.1_gene;TEA020611.1_gene;TEA018270.1_gene;TEA019551.1_gene;TEA019536.1_gene;TEA008878.1_gene;TEA018805.1_gene;TEA024281.1_gene;TEA017516.1_gene;TEA021584.1_gene;TEA019988.1_gene;TEA033110.1_gene;TEA014446.1_gene;TEA007300.1_gene;TEA021718.1_gene;TEA023485.1_gene;TEA027949.1_gene;TEA016154.1_gene
MSTRG.69545.1	TEA009899.1_gene;TEA016154.1_gene
MSTRG.152847.2	TEA017046.1_gene;TEA002642.1_gene;TEA018981.1_gene;TEA008916.1_gene
MSTRG.126343.20	TEA023341.1_gene
MSTRG.118049.1	TEA012279.1_gene;TEA025140.1_gene;TEA022710.1_gene;TEA019906.1_gene;TEA030960.1_gene
MSTRG.139744.1	TEA021760.1_gene;TEA027577.1_gene;TEA018221.1_gene;TEA020420.1_gene;TEA013042.1_gene;TEA025973.1_gene;TEA019326.1_gene;TEA014836.1_gene;TEA023846.1_gene;TEA010077.1_gene;TEA014395.1_gene;TEA004981.1_gene;TEA001333.1_gene;TEA018049.1_gene;TEA030890.1_gene;TEA021116.1_gene;TEA014417.1_gene;TEA009377.1_gene
MSTRG.111678.1	TEA008822.1_gene;TEA015554.1_gene
MSTRG.16446.1	TEA029880.1_gene
MSTRG.42099.1	TEA025647.1_gene;TEA023485.1_gene;TEA016154.1_gene
MSTRG.102899.2	TEA002656.1_gene;TEA021399.1_gene;TEA000522.1_gene;TEA020647.1_gene;TEA020652.1_gene;TEA016804.1_gene;TEA007543.1_gene;TEA033258.1_gene;TEA019629.1_gene;TEA005030.1_gene;TEA020078.1_gene;TEA029083.1_gene;TEA025648.1_gene;TEA032746.1_gene;TEA016881.1_gene;TEA004930.1_gene;TEA028673.1_gene;TEA006818.1_gene;TEA023600.1_gene;TEA011074.1_gene;TEA032372.1_gene;TEA012132.1_gene;TEA020226.1_gene;TEA00945…
MSTRG.89341.2	TEA018515.1_gene
MSTRG.121525.41	TEA027795.1_gene
MSTRG.63960.2	TEA012848.1_gene
MSTRG.101457.1	TEA023470.1_gene
MSTRG.89956.1	TEA018546.1_gene;TEA034052.1_gene;TEA030399.1_gene;TEA014141.1_gene
MSTRG.121511.2	TEA004240.1_gene;TEA025647.1_gene;TEA021584.1_gene;TEA006218.1_gene;TEA003766.1_gene;TEA009805.1_gene;TEA023485.1_gene;TEA016154.1_gene
MSTRG.53907.1	TEA033382.1_gene;TEA028886.1_gene;TEA018324.1_gene
MSTRG.117319.1	TEA027407.1_gene;TEA033227.1_gene;TEA007755.1_gene;TEA027410.1_gene;TEA018366.1_gene;TEA023485.1_gene;TEA025647.1_gene;TEA016154.1_gene
MSTRG.62518.2	TEA025647.1_gene;TEA023485.1_gene;TEA016154.1_gene
MSTRG.150730.6	TEA027795.1_gene
MSTRG.127109.1	TEA009436.1_gene
MSTRG.43972.9	TEA027795.1_gene;TEA022783.1_gene
MSTRG.121476.2	TEA009712.1_gene;TEA004240.1_gene
MSTRG.133847.1	TEA023485.1_gene;TEA025647.1_gene;TEA021718.1_gene;TEA021584.1_gene;TEA003403.1_gene;TEA016154.1_gene;TEA019519.1_gene
MSTRG.86926.1	TEA011618.1_gene;TEA010255.1_gene;TEA023098.1_gene
MSTRG.44630.2	TEA022783.1_gene;TEA009712.1_gene;TEA003479.1_gene;TEA027795.1_gene
MSTRG.109916.2	TEA015149.1_gene
MSTRG.98723.7	TEA004068.1_gene
MSTRG.9990.2	TEA018838.1_gene
MSTRG.110115.5	TEA012755.1_gene;TEA024281.1_gene;TEA021504.1_gene;TEA025647.1_gene;TEA005928.1_gene;TEA021584.1_gene;TEA008878.1_gene;TEA023485.1_gene;TEA016154.1_gene
MSTRG.154466.1	TEA020576.1_gene;TEA000941.1_gene;TEA020577.1_gene;TEA013866.1_gene;TEA000502.1_gene;TEA005888.1_gene
MSTRG.137357.1	TEA005328.1_gene;TEA025934.1_gene;TEA014859.1_gene;TEA007293.1_gene
MSTRG.110253.1	TEA015414.1_gene;TEA021213.1_gene;TEA027570.1_gene;TEA005493.1_gene;TEA011357.1_gene;TEA009991.1_gene;TEA011935.1_gene;TEA006428.1_gene;TEA016023.1_gene;TEA030260.1_gene;TEA011967.1_gene;TEA029511.1_gene;TEA002218.1_gene;TEA010782.1_gene;TEA016394.1_gene;TEA024808.1_gene;TEA022137.1_gene;TEA009860.1_gene;TEA023712.1_gene;TEA019835.1_gene;TEA018824.1_gene;TEA022099.1_gene;TEA003214.1_gene;TEA02537…
MSTRG.148669.1	TEA031641.1_gene;TEA003653.1_gene
MSTRG.152946.2	TEA022325.1_gene;TEA025647.1_gene;TEA023485.1_gene;TEA021584.1_gene;TEA016154.1_gene
MSTRG.99894.6	TEA011342.1_gene;TEA004405.1_gene;TEA009160.1_gene
MSTRG.62179.3	TEA014046.1_gene
MSTRG.102613.2	TEA015112.1_gene;TEA027917.1_gene;TEA020563.1_gene;TEA022191.1_gene;TEA030547.1_gene
MSTRG.13173.1	TEA008559.1_gene
MSTRG.125102.1	TEA018508.1_gene;TEA018220.1_gene;TEA028604.1_gene;TEA023759.1_gene;TEA011187.1_gene;TEA011828.1_gene;TEA008392.1_gene;TEA011894.1_gene;TEA017172.1_gene;TEA013975.1_gene;TEA004158.1_gene;TEA010263.1_gene;TEA025877.1_gene;TEA000304.1_gene;TEA004463.1_gene
MSTRG.121728.1	TEA027795.1_gene
MSTRG.36344.3	TEA023485.1_gene;TEA025647.1_gene;TEA016154.1_gene
MSTRG.27675.1	TEA033091.1_gene;TEA024376.1_gene;TEA029259.1_gene;TEA006243.1_gene;TEA022026.1_gene;TEA013126.1_gene;TEA018785.1_gene;TEA032760.1_gene;TEA009515.1_gene
MSTRG.75477.1	TEA033382.1_gene;TEA028886.1_gene;TEA004260.1_gene;TEA001535.1_gene;TEA026057.1_gene
MSTRG.60496.1	TEA028159.1_gene;TEA022198.1_gene
MSTRG.1207.1	TEA020262.1_gene;TEA012639.1_gene;TEA015084.1_gene;TEA029072.1_gene
MSTRG.120614.1	TEA025582.1_gene
MSTRG.105250.1	TEA008865.1_gene
MSTRG.111722.1	TEA022460.1_gene;TEA003976.1_gene
MSTRG.37729.1	TEA033771.1_gene
MSTRG.92039.2	TEA015084.1_gene;TEA020262.1_gene;TEA006848.1_gene
MSTRG.60986.2	TEA012330.1_gene;TEA005208.1_gene;TEA004162.1_gene;TEA011616.1_gene;TEA014682.1_gene;TEA010592.1_gene;TEA015305.1_gene
MSTRG.42492.2	TEA016154.1_gene;TEA025647.1_gene
MSTRG.6753.5	TEA008138.1_gene
MSTRG.23811.2	TEA017764.1_gene
MSTRG.107999.1	TEA025647.1_gene;TEA021584.1_gene;TEA023485.1_gene;TEA016154.1_gene
MSTRG.92171.1	TEA008142.1_gene;TEA011041.1_gene;TEA028976.1_gene;TEA017296.1_gene;TEA013423.1_gene;TEA020423.1_gene;TEA020134.1_gene;TEA012793.1_gene;TEA026880.1_gene;TEA029999.1_gene
MSTRG.7928.1	TEA031869.1_gene
MSTRG.50721.1	TEA019663.1_gene;TEA002819.1_gene
MSTRG.79968.1	TEA024148.1_gene;TEA003691.1_gene
MSTRG.66596.1	TEA030914.1_gene;TEA001360.1_gene;TEA011200.1_gene;TEA001196.1_gene
MSTRG.47437.1	TEA002090.1_gene
MSTRG.146572.3	TEA032146.1_gene;TEA017714.1_gene;TEA033287.1_gene;TEA021184.1_gene
MSTRG.86688.1	TEA033401.1_gene;TEA006920.1_gene;TEA026795.1_gene;TEA001554.1_gene;TEA028787.1_gene;TEA025018.1_gene
MSTRG.11629.1	TEA032906.1_gene;TEA018220.1_gene;TEA028604.1_gene;TEA018508.1_gene;TEA025877.1_gene;TEA019784.1_gene
MSTRG.74732.1	TEA004030.1_gene
MSTRG.91039.1	TEA025647.1_gene;TEA021584.1_gene;TEA023485.1_gene;TEA016154.1_gene
MSTRG.66247.1	TEA030564.1_gene;TEA011827.1_gene;TEA033159.1_gene;TEA023108.1_gene;TEA017716.1_gene
MSTRG.101650.4	TEA023894.1_gene
MSTRG.33178.2	TEA025647.1_gene;TEA016154.1_gene
MSTRG.2694.2	TEA027795.1_gene;TEA022783.1_gene
MSTRG.13118.1	TEA023259.1_gene
MSTRG.83301.3	TEA028766.1_gene;TEA027316.1_gene;TEA015112.1_gene;TEA027917.1_gene;TEA000117.1_gene;TEA003087.1_gene;TEA001260.1_gene;TEA029058.1_gene
MSTRG.42504.1	TEA008142.1_gene;TEA028976.1_gene;TEA011041.1_gene;TEA017296.1_gene;TEA013423.1_gene;TEA020423.1_gene;TEA012793.1_gene;TEA020134.1_gene;TEA026880.1_gene;TEA029999.1_gene
MSTRG.84011.1	TEA013268.1_gene;TEA013259.1_gene
MSTRG.117671.1	TEA008671.1_gene;TEA029967.1_gene
MSTRG.40256.1	TEA022783.1_gene;TEA003479.1_gene;TEA027795.1_gene;TEA009712.1_gene
MSTRG.362.1	TEA019627.1_gene
MSTRG.150279.1	TEA005643.1_gene;TEA005630.1_gene;TEA005649.1_gene;TEA005628.1_gene
MSTRG.42416.1	TEA007599.1_gene;TEA033645.1_gene;TEA027508.1_gene;TEA016154.1_gene;TEA025647.1_gene;TEA025428.1_gene;TEA018401.1_gene
MSTRG.126945.5	TEA023964.1_gene;TEA030160.1_gene;TEA024797.1_gene
MSTRG.121737.1	TEA015626.1_gene;TEA027795.1_gene;TEA022783.1_gene
MSTRG.88776.1	TEA029903.1_gene;TEA025973.1_gene;TEA014087.1_gene;TEA018837.1_gene;TEA009533.1_gene;TEA020422.1_gene;TEA021845.1_gene;TEA011913.1_gene;TEA026504.1_gene;TEA018526.1_gene;TEA014468.1_gene;TEA005756.1_gene;TEA020640.1_gene;TEA018430.1_gene;TEA020415.1_gene;TEA024045.1_gene;TEA013340.1_gene;TEA017404.1_gene;TEA001018.1_gene;TEA000639.1_gene;TEA026160.1_gene;TEA027577.1_gene;TEA025881.1_gene;TEA02384…
MSTRG.131845.4	TEA028604.1_gene;TEA032906.1_gene;TEA020835.1_gene;TEA019784.1_gene
MSTRG.10462.1	TEA015112.1_gene;TEA027917.1_gene;TEA020563.1_gene;TEA027316.1_gene;TEA000117.1_gene;TEA022079.1_gene;TEA031405.1_gene;TEA028766.1_gene;TEA005778.1_gene;TEA029058.1_gene;TEA015371.1_gene;TEA030547.1_gene;TEA028976.1_gene;TEA004290.1_gene;TEA021499.1_gene;TEA025894.1_gene;TEA029874.1_gene;TEA021652.1_gene
MSTRG.83303.1	TEA032206.1_gene;TEA005386.1_gene;TEA012421.1_gene;TEA025647.1_gene;TEA021584.1_gene;TEA023485.1_gene;TEA016154.1_gene
MSTRG.12147.1	TEA001582.1_gene;TEA001583.1_gene;TEA001569.1_gene;TEA012734.1_gene;TEA006902.1_gene;TEA004895.1_gene;TEA022728.1_gene;TEA012092.1_gene
MSTRG.19330.1	TEA011911.1_gene
MSTRG.131640.1	TEA024707.1_gene;TEA014952.1_gene;TEA022963.1_gene
MSTRG.129662.1	TEA024643.1_gene;TEA025346.1_gene;TEA006106.1_gene;TEA026415.1_gene;TEA013119.1_gene;TEA008873.1_gene;TEA008673.1_gene;TEA025261.1_gene;TEA021928.1_gene;TEA012769.1_gene;TEA024841.1_gene;TEA027920.1_gene;TEA006081.1_gene;TEA007281.1_gene;TEA018286.1_gene;TEA003747.1_gene;TEA010313.1_gene;TEA008096.1_gene;TEA006369.1_gene;TEA007666.1_gene;TEA023987.1_gene;TEA029241.1_gene;TEA025194.1_gene;TEA02161…
MSTRG.57912.1	TEA029913.1_gene
MSTRG.112476.1	TEA032188.1_gene;TEA005427.1_gene;TEA005420.1_gene;TEA009836.1_gene;TEA004037.1_gene
MSTRG.9824.1	TEA009369.1_gene
MSTRG.96990.1	TEA007374.1_gene;TEA002124.1_gene
MSTRG.41458.7	TEA012740.1_gene;TEA002941.1_gene;TEA025010.1_gene;TEA033094.1_gene;TEA004235.1_gene;TEA023107.1_gene;TEA000795.1_gene;TEA009236.1_gene;TEA001075.1_gene;TEA027917.1_gene;TEA033089.1_gene;TEA030898.1_gene
MSTRG.151123.2	TEA005464.1_gene;TEA017146.1_gene
MSTRG.108410.12	TEA029218.1_gene;TEA029583.1_gene;TEA002491.1_gene;TEA028289.1_gene;TEA021522.1_gene;TEA019306.1_gene;TEA015626.1_gene;TEA030312.1_gene;TEA004583.1_gene;TEA030035.1_gene;TEA017101.1_gene;TEA021751.1_gene
MSTRG.152662.1	TEA026779.1_gene;TEA020962.1_gene;TEA006398.1_gene
MSTRG.49501.1	TEA016394.1_gene;TEA025647.1_gene;TEA031343.1_gene;TEA024281.1_gene;TEA008878.1_gene;TEA008033.1_gene;TEA021584.1_gene;TEA023485.1_gene;TEA016154.1_gene
MSTRG.109593.2	TEA009497.1_gene;TEA022899.1_gene;TEA024627.1_gene;TEA023673.1_gene;TEA012575.1_gene;TEA018425.1_gene;TEA009708.1_gene;TEA000420.1_gene;TEA030804.1_gene;TEA031342.1_gene;TEA001141.1_gene;TEA008217.1_gene;TEA024682.1_gene;TEA004400.1_gene;TEA006709.1_gene;TEA030256.1_gene;TEA000537.1_gene;TEA017942.1_gene;TEA009229.1_gene;TEA030564.1_gene;TEA023883.1_gene;TEA007809.1_gene;TEA023630.1_gene;TEA02510…
MSTRG.70919.1	TEA017658.1_gene;TEA019629.1_gene
MSTRG.31217.1	TEA021846.1_gene
MSTRG.66463.1	TEA013851.1_gene;TEA004154.1_gene;TEA011738.1_gene;TEA024769.1_gene;TEA013059.1_gene;TEA028056.1_gene;TEA021836.1_gene;TEA014076.1_gene;TEA029880.1_gene;TEA000155.1_gene;TEA013950.1_gene;TEA008544.1_gene;TEA032501.1_gene;TEA026963.1_gene;TEA011732.1_gene;TEA007437.1_gene;TEA020030.1_gene;TEA019204.1_gene;TEA029438.1_gene;TEA003866.1_gene;TEA009946.1_gene;TEA025775.1_gene;TEA026031.1_gene;TEA02968…
MSTRG.61986.1	TEA016771.1_gene;TEA002252.1_gene;TEA022038.1_gene;TEA011920.1_gene;TEA018052.1_gene;TEA016759.1_gene;TEA016154.1_gene;TEA025647.1_gene
MSTRG.145738.1	TEA025758.1_gene
MSTRG.80647.1	TEA019384.1_gene;TEA029458.1_gene;TEA012503.1_gene;TEA017910.1_gene;TEA012505.1_gene;TEA024797.1_gene;TEA017907.1_gene;TEA012502.1_gene;TEA019382.1_gene;TEA019375.1_gene;TEA024800.1_gene;TEA023218.1_gene;TEA033365.1_gene;TEA029092.1_gene;TEA024202.1_gene;TEA009210.1_gene;TEA029406.1_gene;TEA000534.1_gene;TEA000397.1_gene;TEA014168.1_gene;TEA027537.1_gene;TEA031985.1_gene;TEA029704.1_gene
MSTRG.118257.1	TEA001957.1_gene;TEA007668.1_gene;TEA027381.1_gene;TEA019769.1_gene;TEA025346.1_gene;TEA003310.1_gene;TEA032888.1_gene;TEA024643.1_gene;TEA017988.1_gene;TEA012129.1_gene;TEA005264.1_gene;TEA005626.1_gene;TEA002477.1_gene;TEA005836.1_gene
MSTRG.25731.1	TEA007323.1_gene;TEA007318.1_gene;TEA001476.1_gene;TEA032367.1_gene
MSTRG.43954.3	TEA027795.1_gene;TEA009712.1_gene
MSTRG.100494.1	TEA030681.1_gene;TEA028510.1_gene;TEA021513.1_gene;TEA016094.1_gene
MSTRG.118604.1	TEA002219.1_gene
MSTRG.32928.1	TEA011549.1_gene
MSTRG.50118.1	TEA017285.1_gene;TEA011911.1_gene;TEA002813.1_gene;TEA011207.1_gene;TEA024118.1_gene;TEA023972.1_gene;TEA033618.1_gene;TEA032609.1_gene;TEA003735.1_gene;TEA033091.1_gene;TEA031842.1_gene;TEA026613.1_gene
MSTRG.24920.2	TEA033207.1_gene;TEA013562.1_gene;TEA009004.1_gene
MSTRG.107862.1	TEA032802.1_gene;TEA000146.1_gene
MSTRG.38859.1	TEA010263.1_gene;TEA000304.1_gene;TEA018220.1_gene;TEA025877.1_gene;TEA020835.1_gene;TEA014682.1_gene;TEA018508.1_gene;TEA028824.1_gene;TEA008392.1_gene;TEA011198.1_gene;TEA029009.1_gene;TEA015961.1_gene
MSTRG.145316.45	TEA027795.1_gene
MSTRG.11168.1	TEA016023.1_gene;TEA010040.1_gene;TEA017561.1_gene;TEA025326.1_gene;TEA006428.1_gene;TEA032973.1_gene;TEA029511.1_gene;TEA016394.1_gene;TEA001718.1_gene;TEA027807.1_gene;TEA011967.1_gene;TEA003483.1_gene;TEA002218.1_gene;TEA016412.1_gene;TEA027042.1_gene;TEA027009.1_gene;TEA010094.1_gene;TEA010731.1_gene;TEA004336.1_gene;TEA005493.1_gene;TEA013051.1_gene;TEA018298.1_gene;TEA023052.1_gene;TEA01745…
MSTRG.120185.1	TEA020262.1_gene
MSTRG.25871.1	TEA018508.1_gene;TEA018220.1_gene;TEA023759.1_gene;TEA011894.1_gene;TEA011828.1_gene;TEA011187.1_gene;TEA008392.1_gene;TEA017172.1_gene;TEA013975.1_gene;TEA004158.1_gene;TEA025877.1_gene;TEA028604.1_gene;TEA020835.1_gene;TEA004463.1_gene;TEA011198.1_gene;TEA010263.1_gene;TEA002926.1_gene;TEA024384.1_gene;TEA022099.1_gene
MSTRG.136581.1	TEA000877.1_gene;TEA023074.1_gene;TEA014219.1_gene;TEA016349.1_gene;TEA013271.1_gene;TEA029730.1_gene
MSTRG.9716.1	TEA020570.1_gene;TEA020990.1_gene;TEA002034.1_gene;TEA029674.1_gene;TEA012339.1_gene;TEA018006.1_gene;TEA004262.1_gene;TEA023910.1_gene;TEA014342.1_gene;TEA006759.1_gene;TEA026703.1_gene;TEA030807.1_gene;TEA009957.1_gene;TEA029772.1_gene;TEA021119.1_gene;TEA029959.1_gene;TEA025388.1_gene;TEA005301.1_gene;TEA019115.1_gene
MSTRG.96964.1	TEA025805.1_gene
MSTRG.124084.11	TEA007520.1_gene;TEA019234.1_gene
MSTRG.28455.1	TEA021540.1_gene;TEA002987.1_gene;TEA027223.1_gene;TEA022043.1_gene;TEA005493.1_gene;TEA019609.1_gene;TEA011837.1_gene;TEA002565.1_gene
MSTRG.134877.1	TEA023257.1_gene
MSTRG.150728.2	TEA004240.1_gene;TEA009712.1_gene
MSTRG.58351.1	TEA018508.1_gene;TEA018220.1_gene;TEA011894.1_gene;TEA011187.1_gene;TEA023759.1_gene;TEA008392.1_gene;TEA033451.1_gene;TEA011828.1_gene;TEA013975.1_gene;TEA017172.1_gene;TEA025877.1_gene;TEA004158.1_gene;TEA020835.1_gene;TEA010263.1_gene;TEA004463.1_gene
MSTRG.134713.6	TEA017677.1_gene;TEA030632.1_gene;TEA021767.1_gene;TEA031440.1_gene;TEA013125.1_gene;TEA008670.1_gene;TEA009017.1_gene;TEA014384.1_gene;TEA027807.1_gene;TEA002988.1_gene;TEA000372.1_gene;TEA025412.1_gene;TEA000424.1_gene;TEA018657.1_gene;TEA005061.1_gene;TEA013558.1_gene;TEA025530.1_gene;TEA022112.1_gene;TEA014552.1_gene;TEA013119.1_gene;TEA020379.1_gene;TEA024872.1_gene;TEA002072.1_gene;TEA02463…
MSTRG.112763.1	TEA016154.1_gene;TEA023485.1_gene;TEA025647.1_gene;TEA021584.1_gene
MSTRG.6626.1	TEA022783.1_gene
MSTRG.39815.1	TEA021584.1_gene;TEA025647.1_gene;TEA023485.1_gene;TEA016154.1_gene
MSTRG.15087.1	TEA027917.1_gene
MSTRG.80940.1	TEA016633.1_gene;TEA001349.1_gene;TEA005123.1_gene;TEA000716.1_gene
MSTRG.3337.2	TEA032188.1_gene;TEA003099.1_gene
MSTRG.90062.2	TEA025647.1_gene;TEA021584.1_gene;TEA023485.1_gene;TEA016154.1_gene
MSTRG.108210.3	TEA013674.1_gene;TEA018756.1_gene
MSTRG.36032.1	TEA033826.1_gene
MSTRG.6120.6	TEA021167.1_gene
MSTRG.80342.1	TEA025041.1_gene;TEA006589.1_gene
MSTRG.3536.1	TEA030485.1_gene;TEA019839.1_gene;TEA030547.1_gene;TEA024791.1_gene;TEA016567.1_gene
MSTRG.102996.1	TEA012333.1_gene
MSTRG.98723.5	TEA004068.1_gene
MSTRG.68684.1	TEA020158.1_gene;TEA020044.1_gene
MSTRG.17130.2	TEA023600.1_gene;TEA014530.1_gene;TEA023756.1_gene;TEA020271.1_gene;TEA005504.1_gene;TEA017551.1_gene;TEA033719.1_gene;TEA009300.1_gene;TEA007888.1_gene;TEA028416.1_gene;TEA033091.1_gene;TEA022026.1_gene;TEA033178.1_gene;TEA006271.1_gene;TEA029259.1_gene;TEA028512.1_gene;TEA030631.1_gene;TEA028409.1_gene;TEA022079.1_gene;TEA023253.1_gene;TEA019567.1_gene;TEA000631.1_gene;TEA023231.1_gene;TEA02104…
MSTRG.34133.1	TEA017107.1_gene;TEA020199.1_gene;TEA020157.1_gene;TEA018214.1_gene;TEA001448.1_gene
MSTRG.25405.8	TEA028975.1_gene
MSTRG.29414.9	TEA021492.1_gene;TEA016154.1_gene;TEA004833.1_gene;TEA023485.1_gene;TEA025647.1_gene;TEA021584.1_gene
MSTRG.4837.20	TEA027795.1_gene;TEA022783.1_gene
MSTRG.121748.1	TEA009712.1_gene;TEA004240.1_gene
MSTRG.141163.1	TEA028196.1_gene;TEA028184.1_gene;TEA027558.1_gene
MSTRG.136622.1	TEA032773.1_gene
MSTRG.65197.3	TEA008385.1_gene;TEA012330.1_gene;TEA019393.1_gene;TEA018785.1_gene;TEA005150.1_gene;TEA008782.1_gene;TEA024754.1_gene;TEA004162.1_gene;TEA024820.1_gene;TEA013587.1_gene;TEA029040.1_gene;TEA025331.1_gene;TEA011221.1_gene;TEA015305.1_gene;TEA011616.1_gene;TEA032218.1_gene;TEA000632.1_gene;TEA007856.1_gene;TEA010592.1_gene;TEA014682.1_gene;TEA005208.1_gene;TEA032815.1_gene;TEA004865.1_gene;TEA02384…
MSTRG.101158.4	TEA027508.1_gene;TEA025647.1_gene;TEA016154.1_gene
MSTRG.124084.15	TEA019234.1_gene
MSTRG.40072.1	TEA011687.1_gene
MSTRG.68271.1	TEA031177.1_gene
MSTRG.37087.1	TEA028705.1_gene;TEA028699.1_gene;TEA017418.1_gene;TEA029461.1_gene
MSTRG.77207.1	TEA027254.1_gene;TEA012775.1_gene;TEA015084.1_gene;TEA013790.1_gene
MSTRG.148065.1	TEA016154.1_gene
MSTRG.15040.1	TEA033199.1_gene
MSTRG.84666.1	TEA031925.1_gene;TEA009214.1_gene;TEA033604.1_gene;TEA003418.1_gene;TEA027542.1_gene;TEA016861.1_gene;TEA016817.1_gene;TEA022714.1_gene;TEA018622.1_gene;TEA002017.1_gene;TEA002879.1_gene;TEA003045.1_gene;TEA033374.1_gene;TEA009881.1_gene;TEA003070.1_gene;TEA002527.1_gene;TEA032158.1_gene;TEA005461.1_gene
MSTRG.132618.2	TEA024626.1_gene
MSTRG.142694.6	TEA003479.1_gene;TEA022783.1_gene;TEA027795.1_gene;TEA009712.1_gene
MSTRG.69302.2	TEA000956.1_gene;TEA021652.1_gene;TEA009344.1_gene;TEA011883.1_gene;TEA023618.1_gene;TEA023592.1_gene;TEA030547.1_gene;TEA016341.1_gene;TEA031009.1_gene;TEA031405.1_gene;TEA027917.1_gene;TEA024506.1_gene;TEA019234.1_gene;TEA011440.1_gene
MSTRG.108696.1	TEA030083.1_gene;TEA006860.1_gene;TEA005695.1_gene;TEA031463.1_gene;TEA005383.1_gene;TEA024741.1_gene;TEA004810.1_gene;TEA006120.1_gene;TEA015070.1_gene;TEA018212.1_gene;TEA015566.1_gene;TEA018027.1_gene
MSTRG.121525.44	TEA027795.1_gene;TEA022783.1_gene
MSTRG.79730.4	TEA021862.1_gene;TEA005778.1_gene;TEA029874.1_gene;TEA003395.1_gene
MSTRG.81642.1	TEA015356.1_gene;TEA005659.1_gene;TEA011034.1_gene;TEA001085.1_gene
MSTRG.135806.1	TEA002656.1_gene;TEA033592.1_gene;TEA006740.1_gene;TEA016809.1_gene;TEA032434.1_gene;TEA032432.1_gene;TEA016140.1_gene;TEA023748.1_gene;TEA014654.1_gene;TEA013684.1_gene;TEA016802.1_gene;TEA002370.1_gene;TEA004924.1_gene;TEA033569.1_gene;TEA032639.1_gene;TEA027816.1_gene;TEA001690.1_gene;TEA003765.1_gene;TEA003383.1_gene;TEA016122.1_gene;TEA013263.1_gene;TEA008155.1_gene;TEA025385.1_gene;TEA02725…
MSTRG.137451.1	TEA023485.1_gene;TEA025647.1_gene;TEA016154.1_gene
MSTRG.98953.2	TEA021504.1_gene;TEA025313.1_gene;TEA024281.1_gene;TEA018270.1_gene;TEA005093.1_gene;TEA016394.1_gene;TEA025647.1_gene;TEA020611.1_gene;TEA018805.1_gene;TEA033496.1_gene;TEA015684.1_gene;TEA003192.1_gene;TEA019988.1_gene;TEA002690.1_gene;TEA031343.1_gene;TEA033110.1_gene;TEA032444.1_gene;TEA017516.1_gene;TEA020836.1_gene;TEA007300.1_gene;TEA032924.1_gene;TEA021718.1_gene;TEA021584.1_gene;TEA01041…
MSTRG.2695.4	TEA004240.1_gene
MSTRG.42743.1	TEA025647.1_gene;TEA016154.1_gene;TEA023485.1_gene
MSTRG.69733.1	TEA025674.1_gene;TEA026296.1_gene;TEA026294.1_gene
MSTRG.90657.1	TEA018662.1_gene
MSTRG.47565.1	TEA025647.1_gene;TEA021584.1_gene;TEA004833.1_gene;TEA023485.1_gene;TEA016154.1_gene
MSTRG.15243.1	TEA023915.1_gene
MSTRG.121525.7	TEA027795.1_gene;TEA022783.1_gene
MSTRG.94073.1	TEA015149.1_gene
MSTRG.81115.1	TEA018106.1_gene;TEA006136.1_gene;TEA029441.1_gene;TEA003048.1_gene
MSTRG.24964.3	TEA027795.1_gene
MSTRG.60986.3	TEA012330.1_gene;TEA005208.1_gene;TEA010263.1_gene;TEA004162.1_gene;TEA025331.1_gene;TEA011616.1_gene;TEA014682.1_gene;TEA007856.1_gene;TEA015961.1_gene;TEA005150.1_gene;TEA032218.1_gene;TEA010592.1_gene;TEA011764.1_gene;TEA012875.1_gene;TEA029009.1_gene;TEA019393.1_gene
MSTRG.136468.2	TEA018871.1_gene
MSTRG.43900.5	TEA027795.1_gene;TEA022783.1_gene
MSTRG.56302.5	TEA029360.1_gene;TEA003766.1_gene;TEA025647.1_gene;TEA021584.1_gene;TEA023485.1_gene;TEA028459.1_gene;TEA016154.1_gene
MSTRG.151338.6	TEA017428.1_gene;TEA023485.1_gene;TEA025647.1_gene;TEA016154.1_gene
MSTRG.11687.1	TEA014849.1_gene;TEA028496.1_gene
MSTRG.132657.1	TEA008614.1_gene;TEA015576.1_gene
MSTRG.151340.1	TEA006146.1_gene
MSTRG.120878.1	TEA029167.1_gene;TEA006899.1_gene;TEA007317.1_gene;TEA028294.1_gene;TEA015517.1_gene;TEA017351.1_gene;TEA027452.1_gene;TEA028595.1_gene;TEA023826.1_gene;TEA008506.1_gene;TEA010948.1_gene;TEA021063.1_gene;TEA015754.1_gene;TEA004625.1_gene;TEA017595.1_gene;TEA011759.1_gene;TEA004527.1_gene;TEA020949.1_gene
MSTRG.57347.1	TEA014446.1_gene;TEA021504.1_gene;TEA003766.1_gene;TEA025647.1_gene;TEA033279.1_gene;TEA021465.1_gene;TEA013098.1_gene;TEA023485.1_gene;TEA004120.1_gene;TEA016154.1_gene;TEA004269.1_gene
MSTRG.12401.2	TEA025853.1_gene
MSTRG.121264.1	TEA021198.1_gene
MSTRG.134637.1	TEA027376.1_gene;TEA008544.1_gene;TEA025162.1_gene
MSTRG.145320.24	TEA004240.1_gene
MSTRG.2214.1	TEA023485.1_gene;TEA025647.1_gene;TEA021584.1_gene;TEA016154.1_gene
MSTRG.54809.1	TEA031031.1_gene
MSTRG.43972.12	TEA027795.1_gene;TEA022783.1_gene
MSTRG.88124.4	TEA033038.1_gene;TEA016118.1_gene
MSTRG.142264.1	TEA027795.1_gene
MSTRG.67439.1	TEA029015.1_gene;TEA021845.1_gene;TEA009281.1_gene
MSTRG.143361.5	TEA032884.1_gene;TEA009601.1_gene
MSTRG.62722.3	TEA018508.1_gene;TEA018220.1_gene;TEA023759.1_gene;TEA012330.1_gene;TEA011828.1_gene;TEA011187.1_gene;TEA004162.1_gene;TEA017172.1_gene;TEA013975.1_gene;TEA008392.1_gene;TEA013587.1_gene;TEA025331.1_gene;TEA011894.1_gene;TEA005150.1_gene;TEA028604.1_gene;TEA004158.1_gene;TEA019393.1_gene;TEA007856.1_gene;TEA011616.1_gene;TEA008385.1_gene;TEA015305.1_gene;TEA032218.1_gene;TEA010592.1_gene;TEA01468…
MSTRG.120777.1	TEA017195.1_gene;TEA028765.1_gene
MSTRG.17269.8	TEA004240.1_gene
MSTRG.72989.1	TEA018508.1_gene;TEA018220.1_gene;TEA023759.1_gene;TEA011828.1_gene;TEA011187.1_gene;TEA032906.1_gene;TEA013975.1_gene;TEA008392.1_gene;TEA017172.1_gene;TEA011894.1_gene;TEA028604.1_gene;TEA004158.1_gene;TEA010263.1_gene
MSTRG.119104.1	TEA016916.1_gene;TEA000984.1_gene
MSTRG.130842.1	TEA025647.1_gene;TEA021584.1_gene;TEA016154.1_gene;TEA023485.1_gene
MSTRG.124155.1	TEA011463.1_gene
MSTRG.22962.1	TEA000877.1_gene;TEA016349.1_gene;TEA023074.1_gene;TEA014219.1_gene
MSTRG.77581.2	TEA018775.1_gene
MSTRG.12936.2	TEA004565.1_gene
MSTRG.150729.2	TEA009712.1_gene;TEA004240.1_gene
MSTRG.92467.1	TEA025805.1_gene
MSTRG.62417.5	TEA013224.1_gene
MSTRG.14329.1	TEA015887.1_gene;TEA015812.1_gene;TEA014775.1_gene;TEA028265.1_gene
MSTRG.2703.1	TEA027795.1_gene;TEA003479.1_gene;TEA022783.1_gene;TEA009712.1_gene
MSTRG.9768.2	TEA019574.1_gene;TEA007141.1_gene
MSTRG.133456.1	TEA027795.1_gene
MSTRG.139176.3	TEA005270.1_gene;TEA028386.1_gene;TEA027742.1_gene
MSTRG.44568.1	TEA025647.1_gene;TEA016154.1_gene;TEA023485.1_gene
MSTRG.137259.3	TEA025348.1_gene;TEA031300.1_gene;TEA025254.1_gene
MSTRG.81813.1	TEA003700.1_gene
MSTRG.51245.2	TEA019988.1_gene;TEA013196.1_gene;TEA026621.1_gene;TEA021492.1_gene;TEA002690.1_gene;TEA033110.1_gene;TEA016394.1_gene;TEA034026.1_gene;TEA022825.1_gene;TEA027508.1_gene;TEA028803.1_gene;TEA031343.1_gene;TEA009899.1_gene;TEA018601.1_gene;TEA023485.1_gene;TEA025647.1_gene;TEA010726.1_gene;TEA001194.1_gene;TEA029810.1_gene;TEA016154.1_gene;TEA020156.1_gene;TEA031555.1_gene;TEA028970.1_gene
MSTRG.33252.2	TEA001939.1_gene;TEA027129.1_gene;TEA009151.1_gene;TEA009602.1_gene;TEA010107.1_gene;TEA010944.1_gene;TEA014533.1_gene;TEA023116.1_gene;TEA017337.1_gene;TEA020403.1_gene;TEA007250.1_gene;TEA027508.1_gene;TEA009280.1_gene;TEA027352.1_gene;TEA003381.1_gene;TEA027280.1_gene;TEA027276.1_gene;TEA000113.1_gene;TEA012694.1_gene;TEA001806.1_gene;TEA033624.1_gene;TEA010415.1_gene
MSTRG.109982.1	TEA027209.1_gene
MSTRG.87055.6	TEA028420.1_gene
MSTRG.51245.1	TEA025647.1_gene;TEA021584.1_gene;TEA023485.1_gene;TEA016154.1_gene
MSTRG.54816.1	TEA001579.1_gene;TEA008692.1_gene;TEA025093.1_gene;TEA029149.1_gene;TEA011223.1_gene;TEA006955.1_gene
MSTRG.49008.1	TEA026035.1_gene;TEA000543.1_gene
MSTRG.6133.1	TEA021958.1_gene
MSTRG.17001.1	TEA018190.1_gene
MSTRG.7681.1	TEA023485.1_gene;TEA016154.1_gene;TEA025647.1_gene
MSTRG.54277.1	TEA027917.1_gene;TEA015371.1_gene;TEA025894.1_gene
MSTRG.11607.1	TEA024001.1_gene;TEA008897.1_gene;TEA000116.1_gene;TEA024806.1_gene;TEA033377.1_gene;TEA005008.1_gene;TEA031489.1_gene;TEA031479.1_gene;TEA023526.1_gene;TEA033870.1_gene;TEA031478.1_gene
MSTRG.141409.1	TEA012303.1_gene
MSTRG.131533.6	TEA025921.1_gene
MSTRG.86107.1	TEA027668.1_gene;TEA032776.1_gene
MSTRG.17851.1	TEA015366.1_gene;TEA005757.1_gene
MSTRG.126285.1	TEA024367.1_gene
MSTRG.36615.20	TEA019845.1_gene
MSTRG.11932.3	TEA000425.1_gene
MSTRG.82473.17	TEA027795.1_gene;TEA022783.1_gene
MSTRG.123227.1	TEA021584.1_gene;TEA025647.1_gene;TEA023485.1_gene;TEA016154.1_gene
MSTRG.101630.1	TEA007892.1_gene;TEA004353.1_gene
MSTRG.101573.13	TEA027795.1_gene;TEA022783.1_gene
MSTRG.120284.3	TEA009712.1_gene;TEA004240.1_gene
MSTRG.22303.1	TEA015647.1_gene
MSTRG.25880.1	TEA009848.1_gene;TEA027316.1_gene;TEA002467.1_gene
MSTRG.2695.1	TEA004240.1_gene
MSTRG.72865.1	TEA018270.1_gene;TEA016394.1_gene;TEA025647.1_gene;TEA021504.1_gene;TEA031343.1_gene;TEA020611.1_gene;TEA019551.1_gene;TEA025342.1_gene;TEA004212.1_gene;TEA005093.1_gene;TEA019525.1_gene;TEA033138.1_gene;TEA003192.1_gene;TEA019536.1_gene;TEA034026.1_gene;TEA008033.1_gene;TEA032924.1_gene;TEA008878.1_gene;TEA018805.1_gene;TEA033496.1_gene;TEA019988.1_gene;TEA025313.1_gene;TEA024281.1_gene;TEA02171…
MSTRG.62494.1	TEA019308.1_gene;TEA007744.1_gene;TEA025556.1_gene
MSTRG.108200.3	TEA000951.1_gene;TEA008260.1_gene;TEA023314.1_gene
MSTRG.142267.1	TEA027795.1_gene
MSTRG.21947.1	TEA025647.1_gene;TEA021584.1_gene;TEA009805.1_gene;TEA023485.1_gene;TEA016154.1_gene
MSTRG.139301.1	TEA006800.1_gene;TEA008448.1_gene;TEA011496.1_gene;TEA030868.1_gene
MSTRG.132411.1	TEA027983.1_gene
MSTRG.100032.1	TEA011359.1_gene;TEA002292.1_gene;TEA022435.1_gene;TEA027514.1_gene;TEA027766.1_gene
MSTRG.52922.14	TEA022783.1_gene;TEA027795.1_gene;TEA003479.1_gene;TEA009712.1_gene
MSTRG.38389.1	TEA014849.1_gene;TEA010333.1_gene
MSTRG.122170.1	TEA016154.1_gene;TEA023485.1_gene;TEA025647.1_gene
MSTRG.119005.1	TEA008373.1_gene;TEA001820.1_gene;TEA032868.1_gene
MSTRG.108583.1	TEA021308.1_gene;TEA009051.1_gene
MSTRG.160.2	TEA018952.1_gene
MSTRG.60014.1	TEA029889.1_gene;TEA029879.1_gene;TEA029893.1_gene;TEA029937.1_gene;TEA029954.1_gene
MSTRG.99802.1	TEA015626.1_gene
MSTRG.108795.1	TEA019233.1_gene
MSTRG.16186.4	TEA015549.1_gene
MSTRG.58568.1	TEA008832.1_gene;TEA024645.1_gene;TEA008872.1_gene;TEA031548.1_gene;TEA012995.1_gene
MSTRG.51285.1	TEA015210.1_gene
MSTRG.51116.6	TEA025647.1_gene;TEA017305.1_gene;TEA023485.1_gene;TEA016154.1_gene;TEA021584.1_gene;TEA003766.1_gene
MSTRG.43283.2	TEA009520.1_gene;TEA018703.1_gene;TEA014681.1_gene;TEA012940.1_gene;TEA025863.1_gene;TEA015486.1_gene;TEA006997.1_gene;TEA022843.1_gene;TEA013970.1_gene
MSTRG.138062.1	TEA013726.1_gene;TEA013736.1_gene;TEA013725.1_gene;TEA031296.1_gene
MSTRG.107486.1	TEA025647.1_gene;TEA023485.1_gene;TEA016154.1_gene
MSTRG.59207.1	TEA031980.1_gene;TEA001857.1_gene;TEA030944.1_gene;TEA023322.1_gene;TEA000225.1_gene
MSTRG.73386.1	TEA006218.1_gene;TEA025647.1_gene;TEA021584.1_gene;TEA023485.1_gene;TEA016154.1_gene
MSTRG.144846.1	TEA013014.1_gene;TEA025126.1_gene;TEA017862.1_gene;TEA027379.1_gene;TEA000993.1_gene;TEA010649.1_gene
MSTRG.69950.1	TEA031042.1_gene
MSTRG.110033.1	TEA026177.1_gene;TEA027461.1_gene
MSTRG.81921.1	TEA014904.1_gene;TEA016680.1_gene
MSTRG.107238.1	TEA015321.1_gene;TEA015316.1_gene;TEA024412.1_gene;TEA001040.1_gene;TEA022673.1_gene;TEA030924.1_gene
MSTRG.50063.1	TEA000877.1_gene;TEA023074.1_gene;TEA016349.1_gene;TEA014219.1_gene
MSTRG.32718.1	TEA011941.1_gene;TEA012540.1_gene;TEA000890.1_gene;TEA027559.1_gene
MSTRG.49039.1	TEA022183.1_gene
MSTRG.28225.1	TEA023257.1_gene
MSTRG.68502.1	TEA033107.1_gene;TEA004159.1_gene
MSTRG.151774.1	TEA014849.1_gene;TEA010333.1_gene
MSTRG.95777.8	TEA011113.1_gene;TEA018797.1_gene;TEA026825.1_gene;TEA032780.1_gene;TEA028468.1_gene;TEA027092.1_gene
MSTRG.75055.1	TEA013421.1_gene
MSTRG.8485.2	TEA007856.1_gene;TEA012330.1_gene;TEA015305.1_gene;TEA013587.1_gene;TEA019393.1_gene;TEA004162.1_gene;TEA025331.1_gene;TEA032218.1_gene;TEA005150.1_gene;TEA011764.1_gene;TEA011616.1_gene;TEA010592.1_gene;TEA005208.1_gene;TEA014682.1_gene;TEA008385.1_gene;TEA011221.1_gene;TEA022703.1_gene;TEA012875.1_gene;TEA010263.1_gene;TEA032815.1_gene;TEA029040.1_gene
MSTRG.88131.1	TEA008296.1_gene
MSTRG.6563.1	TEA006243.1_gene
MSTRG.133011.1	TEA033630.1_gene;TEA033629.1_gene;TEA017046.1_gene;TEA012769.1_gene;TEA006193.1_gene;TEA018944.1_gene;TEA007410.1_gene;TEA024281.1_gene;TEA004867.1_gene;TEA024984.1_gene;TEA033461.1_gene;TEA020974.1_gene;TEA021920.1_gene;TEA019856.1_gene;TEA022086.1_gene;TEA009383.1_gene;TEA025065.1_gene;TEA015464.1_gene;TEA020973.1_gene;TEA032738.1_gene;TEA013119.1_gene;TEA008674.1_gene;TEA026329.1_gene;TEA00056…
MSTRG.15301.1	TEA021117.1_gene
MSTRG.120225.1	TEA003699.1_gene;TEA028039.1_gene
MSTRG.58992.2	TEA030027.1_gene;TEA014332.1_gene;TEA017454.1_gene;TEA025929.1_gene;TEA015189.1_gene;TEA010833.1_gene;TEA003766.1_gene;TEA033582.1_gene
MSTRG.62342.1	TEA032588.1_gene
MSTRG.4535.1	TEA008878.1_gene;TEA025647.1_gene;TEA021718.1_gene;TEA021584.1_gene;TEA024281.1_gene;TEA023485.1_gene;TEA016154.1_gene
MSTRG.155350.1	TEA011975.1_gene;TEA033479.1_gene
MSTRG.62950.1	TEA030426.1_gene;TEA026961.1_gene;TEA025422.1_gene;TEA030707.1_gene
MSTRG.9830.1	TEA025647.1_gene;TEA021584.1_gene;TEA023485.1_gene
MSTRG.75239.7	TEA023977.1_gene;TEA000250.1_gene;TEA031837.1_gene;TEA025805.1_gene;TEA018149.1_gene;TEA020167.1_gene
MSTRG.135807.1	TEA027988.1_gene;TEA024267.1_gene
MSTRG.7824.1	TEA006899.1_gene;TEA022088.1_gene;TEA014444.1_gene;TEA018883.1_gene;TEA013649.1_gene;TEA003502.1_gene;TEA018798.1_gene;TEA026959.1_gene;TEA014746.1_gene;TEA012670.1_gene;TEA006474.1_gene
MSTRG.25559.21	TEA013658.1_gene;TEA028318.1_gene
MSTRG.116694.8	TEA016154.1_gene;TEA025647.1_gene
MSTRG.149641.2	TEA015534.1_gene
MSTRG.150724.5	TEA016154.1_gene
MSTRG.125711.4	TEA030547.1_gene
MSTRG.14333.1	TEA012995.1_gene;TEA025647.1_gene;TEA020611.1_gene;TEA018805.1_gene;TEA033496.1_gene;TEA021504.1_gene;TEA018270.1_gene;TEA002690.1_gene;TEA019525.1_gene;TEA031343.1_gene;TEA033110.1_gene;TEA025313.1_gene;TEA024281.1_gene;TEA016394.1_gene;TEA034026.1_gene;TEA017305.1_gene;TEA004212.1_gene;TEA005093.1_gene;TEA032924.1_gene;TEA006218.1_gene;TEA021584.1_gene;TEA008878.1_gene;TEA028803.1_gene;TEA01568…
MSTRG.20419.1	TEA023485.1_gene
MSTRG.20217.1	TEA019566.1_gene;TEA020567.1_gene;TEA030806.1_gene;TEA031725.1_gene
MSTRG.154296.1	TEA008104.1_gene;TEA006200.1_gene;TEA008498.1_gene
MSTRG.25782.1	TEA015184.1_gene
MSTRG.93981.3	TEA025647.1_gene;TEA021584.1_gene;TEA023485.1_gene;TEA016154.1_gene
MSTRG.114762.1	TEA011981.1_gene;TEA010791.1_gene
MSTRG.137591.1	TEA016765.1_gene;TEA026757.1_gene;TEA009412.1_gene;TEA032150.1_gene;TEA013656.1_gene;TEA023553.1_gene;TEA015215.1_gene;TEA010415.1_gene;TEA008554.1_gene
MSTRG.50080.1	TEA006428.1_gene;TEA019742.1_gene;TEA002565.1_gene
MSTRG.26378.1	TEA010161.1_gene;TEA018001.1_gene;TEA027949.1_gene;TEA017516.1_gene;TEA029172.1_gene;TEA024619.1_gene;TEA009231.1_gene;TEA021987.1_gene;TEA022814.1_gene;TEA032509.1_gene;TEA006598.1_gene;TEA026934.1_gene;TEA010890.1_gene;TEA028976.1_gene;TEA028970.1_gene;TEA000349.1_gene;TEA019551.1_gene;TEA004363.1_gene;TEA032864.1_gene;TEA008063.1_gene;TEA011555.1_gene;TEA015478.1_gene;TEA029152.1_gene;TEA01650…
MSTRG.13005.2	TEA031458.1_gene
MSTRG.92516.1	TEA008241.1_gene
MSTRG.120284.31	TEA004240.1_gene;TEA009712.1_gene
MSTRG.123550.3	TEA032407.1_gene;TEA021630.1_gene;TEA016198.1_gene
MSTRG.7936.1	TEA006741.1_gene;TEA032419.1_gene;TEA000639.1_gene;TEA019697.1_gene
MSTRG.8772.1	TEA015640.1_gene;TEA033579.1_gene
MSTRG.121471.1	TEA004240.1_gene
MSTRG.117149.14	TEA024263.1_gene
MSTRG.24372.4	TEA004162.1_gene;TEA011764.1_gene;TEA015305.1_gene
MSTRG.107806.1	TEA029408.1_gene
MSTRG.142712.2	TEA020356.1_gene;TEA020342.1_gene
MSTRG.63886.1	TEA025647.1_gene;TEA021584.1_gene;TEA023485.1_gene;TEA016154.1_gene
MSTRG.39151.1	TEA009163.1_gene
MSTRG.46048.12	TEA009712.1_gene;TEA004240.1_gene
MSTRG.65163.1	TEA012154.1_gene;TEA006428.1_gene
MSTRG.149272.1	TEA027818.1_gene
MSTRG.55878.1	TEA025805.1_gene
MSTRG.121475.8	TEA004240.1_gene
MSTRG.82473.21	TEA027795.1_gene;TEA022783.1_gene
MSTRG.102558.1	TEA003479.1_gene;TEA022783.1_gene;TEA027795.1_gene
MSTRG.2309.1	TEA022145.1_gene;TEA023817.1_gene;TEA025707.1_gene;TEA013708.1_gene;TEA025647.1_gene;TEA021584.1_gene;TEA023485.1_gene;TEA016154.1_gene;TEA028392.1_gene
MSTRG.117641.1	TEA016154.1_gene;TEA023485.1_gene;TEA025647.1_gene
MSTRG.4405.8	TEA008962.1_gene
MSTRG.82718.4	TEA017266.1_gene;TEA025647.1_gene;TEA023485.1_gene
MSTRG.75483.1	TEA033496.1_gene;TEA001194.1_gene;TEA025647.1_gene;TEA021584.1_gene;TEA001690.1_gene;TEA025313.1_gene;TEA024281.1_gene;TEA014446.1_gene;TEA007300.1_gene;TEA027508.1_gene;TEA029172.1_gene;TEA023485.1_gene;TEA016154.1_gene
MSTRG.141428.1	TEA012575.1_gene;TEA023977.1_gene;TEA010551.1_gene;TEA002228.1_gene;TEA000250.1_gene;TEA024571.1_gene;TEA033456.1_gene;TEA020876.1_gene;TEA031837.1_gene;TEA025805.1_gene;TEA030453.1_gene;TEA026549.1_gene
MSTRG.109145.1	TEA003731.1_gene;TEA028190.1_gene
MSTRG.13893.1	TEA018837.1_gene;TEA005577.1_gene;TEA032683.1_gene
MSTRG.124876.1	TEA005042.1_gene
MSTRG.66938.1	TEA033382.1_gene;TEA001535.1_gene;TEA002948.1_gene;TEA024426.1_gene;TEA002848.1_gene;TEA022623.1_gene;TEA004260.1_gene;TEA029870.1_gene
MSTRG.110183.2	TEA023979.1_gene
MSTRG.91992.6	TEA018196.1_gene
MSTRG.8177.1	TEA029867.1_gene;TEA025482.1_gene
MSTRG.50148.2	TEA017970.1_gene
MSTRG.98453.1	TEA014459.1_gene
MSTRG.130970.1	TEA023098.1_gene
MSTRG.106213.1	TEA002938.1_gene;TEA008570.1_gene;TEA009528.1_gene;TEA020376.1_gene;TEA027079.1_gene
MSTRG.25459.1	TEA003159.1_gene;TEA011767.1_gene;TEA000383.1_gene
MSTRG.112091.1	TEA001798.1_gene
MSTRG.40224.1	TEA025647.1_gene;TEA021584.1_gene;TEA004833.1_gene;TEA023485.1_gene;TEA016154.1_gene
MSTRG.67027.1	TEA004773.1_gene;TEA005726.1_gene;TEA032663.1_gene
MSTRG.11131.1	TEA033615.1_gene
MSTRG.133514.3	TEA003540.1_gene;TEA028766.1_gene;TEA019254.1_gene;TEA031458.1_gene;TEA004216.1_gene;TEA002467.1_gene;TEA004935.1_gene;TEA020563.1_gene;TEA022079.1_gene;TEA027316.1_gene;TEA009533.1_gene;TEA031405.1_gene;TEA021549.1_gene;TEA032327.1_gene;TEA027917.1_gene;TEA024014.1_gene;TEA003395.1_gene;TEA001777.1_gene;TEA018775.1_gene;TEA029689.1_gene;TEA017033.1_gene;TEA023592.1_gene;TEA016231.1_gene;TEA02219…
MSTRG.105423.2	TEA018856.1_gene;TEA019996.1_gene;TEA018924.1_gene;TEA026769.1_gene;TEA005371.1_gene;TEA029073.1_gene;TEA023766.1_gene;TEA026158.1_gene
MSTRG.128486.3	TEA017407.1_gene;TEA017391.1_gene;TEA023385.1_gene;TEA002544.1_gene;TEA011315.1_gene;TEA030899.1_gene;TEA017402.1_gene;TEA001376.1_gene
MSTRG.30465.10	TEA007205.1_gene;TEA016897.1_gene;TEA006557.1_gene
MSTRG.109035.1	TEA023485.1_gene
MSTRG.133497.1	TEA023485.1_gene;TEA025647.1_gene;TEA016154.1_gene
MSTRG.128848.1	TEA023477.1_gene
MSTRG.81298.1	TEA014260.1_gene;TEA014249.1_gene;TEA014244.1_gene;TEA026036.1_gene;TEA002973.1_gene;TEA021718.1_gene;TEA027081.1_gene;TEA022725.1_gene;TEA002272.1_gene;TEA019913.1_gene;TEA024242.1_gene
MSTRG.111383.1	TEA021492.1_gene;TEA025647.1_gene;TEA021584.1_gene;TEA023485.1_gene;TEA016154.1_gene
MSTRG.3124.1	TEA028604.1_gene
MSTRG.150730.23	TEA003479.1_gene
MSTRG.2010.2	TEA028459.1_gene;TEA029360.1_gene
MSTRG.30170.1	TEA006452.1_gene;TEA024581.1_gene;TEA033753.1_gene;TEA021652.1_gene
MSTRG.111288.1	TEA006077.1_gene;TEA021098.1_gene
MSTRG.78462.1	TEA020611.1_gene;TEA021504.1_gene;TEA018270.1_gene;TEA031343.1_gene;TEA016394.1_gene;TEA004212.1_gene;TEA025647.1_gene;TEA005093.1_gene;TEA008878.1_gene;TEA018805.1_gene;TEA033496.1_gene;TEA024281.1_gene;TEA021584.1_gene;TEA024608.1_gene;TEA027508.1_gene;TEA003766.1_gene;TEA013196.1_gene;TEA008845.1_gene;TEA023485.1_gene;TEA016154.1_gene;TEA024340.1_gene;TEA000326.1_gene
MSTRG.46983.2	TEA021928.1_gene;TEA032465.1_gene;TEA031987.1_gene;TEA021371.1_gene;TEA010431.1_gene
MSTRG.105949.1	TEA027290.1_gene
MSTRG.100445.9	TEA002656.1_gene;TEA032434.1_gene;TEA016809.1_gene;TEA032432.1_gene
MSTRG.127887.4	TEA010028.1_gene
MSTRG.6779.2	TEA018551.1_gene;TEA027807.1_gene;TEA028680.1_gene;TEA013558.1_gene;TEA018530.1_gene;TEA023524.1_gene;TEA008161.1_gene;TEA022043.1_gene;TEA000332.1_gene;TEA001871.1_gene;TEA002072.1_gene;TEA002988.1_gene;TEA025326.1_gene;TEA031599.1_gene;TEA030403.1_gene;TEA020379.1_gene;TEA024872.1_gene;TEA023712.1_gene;TEA017562.1_gene;TEA027223.1_gene;TEA009253.1_gene;TEA022099.1_gene;TEA015415.1_gene;TEA01197…
MSTRG.85146.1	TEA016073.1_gene;TEA005864.1_gene
MSTRG.78380.1	TEA026266.1_gene
MSTRG.151385.1	TEA023485.1_gene;TEA025647.1_gene;TEA016154.1_gene
MSTRG.17273.5	TEA027795.1_gene
MSTRG.97756.1	TEA004153.1_gene
MSTRG.137366.2	TEA005208.1_gene;TEA012330.1_gene;TEA000304.1_gene;TEA010263.1_gene;TEA014682.1_gene;TEA015961.1_gene;TEA028824.1_gene;TEA004162.1_gene;TEA029009.1_gene;TEA011198.1_gene;TEA007856.1_gene
MSTRG.4837.7	TEA027795.1_gene;TEA022783.1_gene
MSTRG.126476.1	TEA020548.1_gene;TEA005628.1_gene;TEA031624.1_gene;TEA003773.1_gene
MSTRG.145316.12	TEA027795.1_gene
MSTRG.60223.1	TEA025062.1_gene;TEA032733.1_gene
MSTRG.78810.1	TEA033279.1_gene
MSTRG.95448.1	TEA015549.1_gene
MSTRG.63982.1	TEA033367.1_gene;TEA000161.1_gene
MSTRG.66928.1	TEA025647.1_gene;TEA023485.1_gene;TEA016154.1_gene
MSTRG.100335.1	TEA025349.1_gene;TEA016784.1_gene;TEA006965.1_gene;TEA025361.1_gene;TEA027231.1_gene;TEA025493.1_gene
MSTRG.101438.4	TEA032442.1_gene;TEA032438.1_gene;TEA023488.1_gene;TEA012448.1_gene;TEA029742.1_gene;TEA000367.1_gene;TEA025301.1_gene;TEA005222.1_gene;TEA019174.1_gene;TEA032054.1_gene;TEA009761.1_gene;TEA009546.1_gene;TEA032754.1_gene;TEA030902.1_gene;TEA012845.1_gene;TEA018824.1_gene;TEA020987.1_gene;TEA017932.1_gene;TEA016263.1_gene;TEA006094.1_gene;TEA021554.1_gene;TEA009432.1_gene;TEA033855.1_gene;TEA03383…
MSTRG.53267.2	TEA021055.1_gene
MSTRG.42492.4	TEA016154.1_gene;TEA023485.1_gene;TEA025647.1_gene
MSTRG.112550.1	TEA023189.1_gene
MSTRG.120398.1	TEA032444.1_gene;TEA029810.1_gene;TEA012247.1_gene;TEA008025.1_gene;TEA032544.1_gene;TEA011907.1_gene;TEA030961.1_gene;TEA033496.1_gene;TEA027508.1_gene;TEA030666.1_gene;TEA001517.1_gene;TEA026007.1_gene;TEA006836.1_gene;TEA009899.1_gene;TEA030783.1_gene;TEA016154.1_gene;TEA016083.1_gene;TEA017354.1_gene;TEA024340.1_gene;TEA031183.1_gene;TEA012952.1_gene;TEA025639.1_gene;TEA009178.1_gene;TEA00972…
MSTRG.151338.1	TEA016220.1_gene;TEA025647.1_gene;TEA023485.1_gene;TEA021584.1_gene;TEA016154.1_gene
MSTRG.122505.2	TEA003157.1_gene;TEA020835.1_gene;TEA008392.1_gene;TEA000304.1_gene;TEA018508.1_gene;TEA025877.1_gene;TEA011198.1_gene;TEA024384.1_gene;TEA010263.1_gene
MSTRG.126228.2	TEA023894.1_gene
MSTRG.145316.17	TEA027795.1_gene;TEA009712.1_gene;TEA003479.1_gene;TEA022783.1_gene
MSTRG.37470.2	TEA004518.1_gene;TEA004522.1_gene;TEA007437.1_gene;TEA002085.1_gene;TEA006001.1_gene;TEA024905.1_gene;TEA016032.1_gene;TEA018522.1_gene;TEA025033.1_gene;TEA013202.1_gene;TEA033274.1_gene;TEA009780.1_gene;TEA002740.1_gene;TEA007180.1_gene;TEA020677.1_gene;TEA030707.1_gene;TEA012415.1_gene;TEA000683.1_gene;TEA014978.1_gene;TEA006875.1_gene;TEA008778.1_gene;TEA021171.1_gene;TEA023004.1_gene;TEA00426…
MSTRG.120283.26	TEA027795.1_gene
MSTRG.119002.1	TEA007883.1_gene;TEA009889.1_gene;TEA029802.1_gene
MSTRG.25319.1	TEA033592.1_gene;TEA002656.1_gene;TEA006740.1_gene;TEA016809.1_gene;TEA032434.1_gene;TEA010590.1_gene;TEA032432.1_gene;TEA016802.1_gene;TEA002370.1_gene;TEA002151.1_gene;TEA000155.1_gene;TEA021832.1_gene;TEA030709.1_gene;TEA004924.1_gene;TEA033569.1_gene;TEA032639.1_gene;TEA027816.1_gene;TEA019073.1_gene;TEA014987.1_gene;TEA031337.1_gene;TEA013263.1_gene;TEA021300.1_gene;TEA022042.1_gene;TEA02725…
MSTRG.135246.2	TEA032906.1_gene;TEA028604.1_gene;TEA020835.1_gene;TEA019784.1_gene;TEA018462.1_gene;TEA002683.1_gene;TEA006094.1_gene;TEA031200.1_gene;TEA001611.1_gene;TEA033370.1_gene;TEA033451.1_gene;TEA009644.1_gene
MSTRG.8235.2	TEA028604.1_gene
MSTRG.145316.3	TEA027795.1_gene;TEA022783.1_gene
MSTRG.29025.1	TEA016503.1_gene;TEA016655.1_gene;TEA013059.1_gene;TEA033473.1_gene
MSTRG.46195.1	TEA003911.1_gene
MSTRG.136413.1	TEA026549.1_gene;TEA022645.1_gene
MSTRG.111224.1	TEA016154.1_gene
MSTRG.24965.3	TEA004240.1_gene;TEA027795.1_gene
MSTRG.553.1	TEA018662.1_gene
MSTRG.8496.2	TEA028093.1_gene;TEA028085.1_gene;TEA005822.1_gene;TEA014990.1_gene;TEA033676.1_gene;TEA004150.1_gene
MSTRG.27258.1	TEA001323.1_gene;TEA019947.1_gene;TEA014248.1_gene
MSTRG.35697.2	TEA016633.1_gene
MSTRG.88397.1	TEA003646.1_gene;TEA022339.1_gene;TEA016388.1_gene;TEA002758.1_gene
MSTRG.74168.1	TEA031873.1_gene
MSTRG.21985.1	TEA018265.1_gene
MSTRG.66694.1	TEA027524.1_gene
MSTRG.29093.10	TEA000254.1_gene
MSTRG.26955.1	TEA027795.1_gene
MSTRG.123956.1	TEA026549.1_gene
MSTRG.17273.2	TEA027795.1_gene
MSTRG.27118.1	TEA019467.1_gene
MSTRG.71048.1	TEA015112.1_gene;TEA027917.1_gene;TEA020563.1_gene;TEA002467.1_gene;TEA027316.1_gene;TEA004216.1_gene;TEA000117.1_gene;TEA022191.1_gene;TEA022079.1_gene;TEA031405.1_gene;TEA029689.1_gene;TEA019254.1_gene;TEA016231.1_gene;TEA024014.1_gene;TEA009352.1_gene;TEA006033.1_gene;TEA033800.1_gene;TEA009533.1_gene;TEA030547.1_gene;TEA001260.1_gene;TEA021652.1_gene;TEA000376.1_gene
MSTRG.128852.1	TEA020563.1_gene;TEA027316.1_gene;TEA015112.1_gene;TEA027917.1_gene;TEA000117.1_gene;TEA029689.1_gene;TEA019254.1_gene;TEA030547.1_gene
MSTRG.121525.25	TEA027795.1_gene
MSTRG.67181.1	TEA001052.1_gene;TEA025568.1_gene
MSTRG.110115.1	TEA012755.1_gene;TEA024281.1_gene;TEA025647.1_gene;TEA021584.1_gene;TEA023485.1_gene;TEA016154.1_gene
MSTRG.134713.5	TEA017677.1_gene;TEA030632.1_gene;TEA021767.1_gene;TEA031440.1_gene;TEA013125.1_gene;TEA008670.1_gene;TEA009017.1_gene;TEA014384.1_gene;TEA027807.1_gene;TEA002988.1_gene;TEA000372.1_gene;TEA025412.1_gene;TEA021313.1_gene;TEA000424.1_gene;TEA018657.1_gene;TEA005061.1_gene;TEA013558.1_gene;TEA025530.1_gene;TEA022112.1_gene;TEA014552.1_gene;TEA013119.1_gene;TEA020379.1_gene;TEA024872.1_gene;TEA00207…
MSTRG.145320.9	TEA004240.1_gene
MSTRG.17304.1	TEA004268.1_gene;TEA004285.1_gene;TEA026779.1_gene;TEA016283.1_gene;TEA033670.1_gene
MSTRG.146768.2	TEA029005.1_gene;TEA006176.1_gene;TEA020403.1_gene;TEA001915.1_gene;TEA025168.1_gene;TEA000079.1_gene;TEA000065.1_gene;TEA032258.1_gene;TEA006709.1_gene;TEA008647.1_gene;TEA024090.1_gene;TEA027387.1_gene;TEA023458.1_gene;TEA020724.1_gene;TEA007196.1_gene;TEA022388.1_gene;TEA027048.1_gene;TEA018345.1_gene;TEA017618.1_gene;TEA021852.1_gene;TEA028655.1_gene;TEA033655.1_gene;TEA018382.1_gene;TEA01366…
MSTRG.34701.1	TEA025429.1_gene;TEA020519.1_gene;TEA015245.1_gene;TEA025433.1_gene;TEA015270.1_gene;TEA015257.1_gene;TEA004615.1_gene
MSTRG.11807.2	TEA025647.1_gene;TEA023485.1_gene;TEA016154.1_gene
MSTRG.142697.1	TEA027795.1_gene;TEA022783.1_gene;TEA003479.1_gene;TEA009712.1_gene;TEA024979.1_gene
MSTRG.147663.27	TEA017716.1_gene
MSTRG.78332.1	TEA016476.1_gene
MSTRG.29363.1	TEA027659.1_gene
MSTRG.145316.51	TEA003479.1_gene;TEA022783.1_gene;TEA001987.1_gene
MSTRG.114904.1	TEA026057.1_gene;TEA005581.1_gene;TEA022673.1_gene;TEA020875.1_gene;TEA030641.1_gene;TEA001535.1_gene;TEA019935.1_gene
MSTRG.48760.3	TEA016154.1_gene
MSTRG.90090.1	TEA008217.1_gene;TEA006783.1_gene;TEA004971.1_gene;TEA007602.1_gene;TEA023630.1_gene;TEA025106.1_gene;TEA014999.1_gene;TEA031344.1_gene;TEA001839.1_gene;TEA028150.1_gene;TEA012575.1_gene;TEA000455.1_gene;TEA018529.1_gene;TEA007636.1_gene;TEA019277.1_gene
MSTRG.140103.1	TEA022757.1_gene;TEA028335.1_gene;TEA028175.1_gene
MSTRG.11490.1	TEA005702.1_gene
MSTRG.121525.48	TEA027795.1_gene;TEA022783.1_gene
MSTRG.55185.1	TEA008288.1_gene;TEA006269.1_gene
MSTRG.67055.1	TEA025647.1_gene;TEA023485.1_gene;TEA016154.1_gene
MSTRG.147933.1	TEA022492.1_gene
MSTRG.154130.1	TEA033107.1_gene
MSTRG.118727.1	TEA025182.1_gene;TEA012474.1_gene
MSTRG.85182.1	TEA007851.1_gene;TEA025726.1_gene;TEA023826.1_gene;TEA027018.1_gene;TEA016455.1_gene;TEA031935.1_gene;TEA003215.1_gene;TEA021373.1_gene
MSTRG.122474.1	TEA025647.1_gene;TEA023485.1_gene;TEA016154.1_gene
MSTRG.26652.1	TEA017285.1_gene;TEA011207.1_gene;TEA002813.1_gene;TEA011911.1_gene;TEA003735.1_gene;TEA033091.1_gene;TEA033618.1_gene;TEA024118.1_gene;TEA032609.1_gene;TEA023972.1_gene;TEA010517.1_gene;TEA023635.1_gene;TEA023154.1_gene;TEA019399.1_gene;TEA032130.1_gene;TEA029604.1_gene;TEA019426.1_gene;TEA024357.1_gene;TEA010369.1_gene;TEA005035.1_gene;TEA020022.1_gene;TEA000989.1_gene;TEA030340.1_gene;TEA03303…
MSTRG.37569.1	TEA012829.1_gene;TEA033461.1_gene;TEA000006.1_gene;TEA001766.1_gene;TEA012644.1_gene;TEA031929.1_gene;TEA012563.1_gene;TEA018824.1_gene;TEA015133.1_gene;TEA032738.1_gene;TEA005627.1_gene
MSTRG.37086.2	TEA000998.1_gene;TEA010268.1_gene;TEA022099.1_gene;TEA027930.1_gene;TEA024718.1_gene;TEA002926.1_gene;TEA019769.1_gene;TEA001197.1_gene
MSTRG.48115.4	TEA021584.1_gene;TEA025647.1_gene;TEA023485.1_gene;TEA016154.1_gene
MSTRG.36032.3	TEA033826.1_gene
MSTRG.24636.1	TEA028731.1_gene;TEA010514.1_gene;TEA018389.1_gene;TEA024841.1_gene;TEA026415.1_gene;TEA006849.1_gene;TEA011987.1_gene;TEA003032.1_gene;TEA007592.1_gene;TEA031169.1_gene;TEA027899.1_gene;TEA019463.1_gene;TEA031075.1_gene
MSTRG.36922.1	TEA019872.1_gene;TEA019197.1_gene
MSTRG.89084.1	TEA020869.1_gene;TEA028319.1_gene;TEA007867.1_gene
MSTRG.98382.1	TEA025947.1_gene;TEA033746.1_gene;TEA002357.1_gene;TEA017380.1_gene;TEA002788.1_gene;TEA032032.1_gene;TEA024220.1_gene;TEA015534.1_gene;TEA023986.1_gene
MSTRG.41011.1	TEA028604.1_gene;TEA032906.1_gene;TEA019784.1_gene;TEA020835.1_gene
MSTRG.48760.2	TEA016154.1_gene
MSTRG.61344.6	TEA013185.1_gene
MSTRG.36205.1	TEA014735.1_gene
MSTRG.142291.1	TEA012114.1_gene;TEA020562.1_gene;TEA012122.1_gene;TEA020563.1_gene;TEA012124.1_gene;TEA025597.1_gene;TEA022612.1_gene;TEA015754.1_gene;TEA018673.1_gene;TEA027507.1_gene;TEA012506.1_gene;TEA026440.1_gene;TEA024098.1_gene;TEA010991.1_gene;TEA032107.1_gene;TEA030898.1_gene;TEA003077.1_gene;TEA022193.1_gene;TEA032633.1_gene;TEA001878.1_gene;TEA022545.1_gene;TEA022388.1_gene;TEA025771.1_gene;TEA02339…
MSTRG.138181.4	TEA032672.1_gene;TEA032677.1_gene;TEA028637.1_gene;TEA032674.1_gene;TEA032667.1_gene
MSTRG.119337.1	TEA024707.1_gene
MSTRG.131830.1	TEA029058.1_gene;TEA027917.1_gene;TEA015371.1_gene;TEA032166.1_gene
MSTRG.120283.13	TEA027795.1_gene;TEA022783.1_gene
MSTRG.50257.1	TEA012974.1_gene;TEA004402.1_gene;TEA007506.1_gene;TEA011466.1_gene;TEA009576.1_gene;TEA004014.1_gene;TEA020908.1_gene
MSTRG.121728.5	TEA027795.1_gene;TEA003479.1_gene;TEA022783.1_gene;TEA009712.1_gene
MSTRG.28898.1	TEA027910.1_gene;TEA020744.1_gene;TEA027912.1_gene;TEA027911.1_gene;TEA025799.1_gene;TEA025806.1_gene;TEA025355.1_gene;TEA002859.1_gene;TEA013893.1_gene
MSTRG.120284.26	TEA004240.1_gene;TEA009712.1_gene
MSTRG.16444.6	TEA016154.1_gene;TEA023485.1_gene;TEA025647.1_gene
MSTRG.59435.2	TEA016529.1_gene;TEA022186.1_gene;TEA000178.1_gene;TEA016807.1_gene;TEA025219.1_gene;TEA029122.1_gene;TEA032201.1_gene;TEA009417.1_gene;TEA011119.1_gene;TEA024861.1_gene;TEA011857.1_gene;TEA020379.1_gene;TEA012649.1_gene;TEA011433.1_gene;TEA009527.1_gene;TEA000752.1_gene;TEA014149.1_gene;TEA026022.1_gene;TEA023386.1_gene;TEA018364.1_gene;TEA030755.1_gene;TEA014458.1_gene;TEA033823.1_gene;TEA02141…
MSTRG.142692.1	TEA027795.1_gene;TEA022783.1_gene;TEA013779.1_gene
MSTRG.152841.1	TEA023756.1_gene;TEA023600.1_gene;TEA020271.1_gene;TEA014530.1_gene;TEA017551.1_gene;TEA009300.1_gene;TEA005504.1_gene;TEA028416.1_gene;TEA013023.1_gene;TEA007888.1_gene;TEA028409.1_gene;TEA033719.1_gene;TEA000631.1_gene;TEA030631.1_gene;TEA005543.1_gene;TEA019567.1_gene;TEA006271.1_gene;TEA028512.1_gene;TEA033178.1_gene;TEA022079.1_gene;TEA003277.1_gene;TEA021046.1_gene;TEA020073.1_gene;TEA00244…
MSTRG.16922.9	TEA018601.1_gene;TEA005145.1_gene;TEA030029.1_gene;TEA016154.1_gene
MSTRG.16700.1	TEA027654.1_gene;TEA007483.1_gene;TEA006327.1_gene
MSTRG.108766.1	TEA025805.1_gene
MSTRG.30582.1	TEA028459.1_gene;TEA025647.1_gene
MSTRG.23258.1	TEA032201.1_gene;TEA028119.1_gene;TEA025095.1_gene;TEA006391.1_gene;TEA033452.1_gene;TEA004500.1_gene
MSTRG.73122.1	TEA014295.1_gene;TEA014293.1_gene
MSTRG.2513.1	TEA016154.1_gene;TEA023485.1_gene;TEA025647.1_gene
MSTRG.94630.5	TEA010034.1_gene
MSTRG.4010.5	TEA002275.1_gene;TEA019596.1_gene;TEA006807.1_gene
MSTRG.145536.2	TEA023600.1_gene;TEA020271.1_gene;TEA023756.1_gene;TEA009300.1_gene;TEA013023.1_gene;TEA028416.1_gene;TEA005504.1_gene;TEA017551.1_gene;TEA014530.1_gene;TEA028409.1_gene;TEA029259.1_gene;TEA033719.1_gene;TEA033178.1_gene;TEA007888.1_gene;TEA022079.1_gene;TEA006271.1_gene;TEA028512.1_gene;TEA033091.1_gene;TEA022026.1_gene;TEA024376.1_gene;TEA021046.1_gene;TEA019567.1_gene;TEA014995.1_gene;TEA03276…
MSTRG.29587.1	TEA032388.1_gene;TEA022383.1_gene;TEA019694.1_gene;TEA009663.1_gene;TEA003375.1_gene;TEA003442.1_gene
MSTRG.111069.1	TEA000877.1_gene;TEA016349.1_gene;TEA023074.1_gene;TEA014219.1_gene
MSTRG.94785.1	TEA024571.1_gene
MSTRG.61909.1	TEA021492.1_gene;TEA025647.1_gene;TEA021584.1_gene;TEA023485.1_gene;TEA016154.1_gene
MSTRG.136845.1	TEA023485.1_gene;TEA025647.1_gene;TEA016154.1_gene
MSTRG.29505.3	TEA033207.1_gene;TEA012056.1_gene;TEA007675.1_gene;TEA009004.1_gene;TEA013562.1_gene
MSTRG.91741.2	TEA016154.1_gene;TEA025647.1_gene
MSTRG.140796.1	TEA003714.1_gene
MSTRG.56993.8	TEA032432.1_gene;TEA032434.1_gene;TEA016809.1_gene;TEA002656.1_gene;TEA012195.1_gene;TEA006740.1_gene;TEA033592.1_gene;TEA016802.1_gene;TEA033569.1_gene;TEA007533.1_gene;TEA010382.1_gene;TEA013263.1_gene;TEA010485.1_gene
MSTRG.135571.2	TEA009004.1_gene;TEA033207.1_gene
MSTRG.107185.2	TEA004510.1_gene
MSTRG.120283.8	TEA027795.1_gene;TEA022783.1_gene
MSTRG.18785.2	TEA027795.1_gene;TEA009712.1_gene;TEA003479.1_gene;TEA022783.1_gene;TEA022309.1_gene
MSTRG.166.1	TEA003158.1_gene;TEA018719.1_gene
MSTRG.56993.2	TEA032432.1_gene;TEA032434.1_gene;TEA016809.1_gene;TEA002656.1_gene;TEA012195.1_gene;TEA033004.1_gene;TEA006740.1_gene;TEA033592.1_gene;TEA007533.1_gene
MSTRG.1660.1	TEA012682.1_gene;TEA020336.1_gene;TEA028530.1_gene
MSTRG.108410.2	TEA029218.1_gene;TEA021522.1_gene;TEA002491.1_gene;TEA015626.1_gene;TEA021751.1_gene;TEA019306.1_gene
MSTRG.145878.1	TEA012803.1_gene;TEA030515.1_gene;TEA008204.1_gene;TEA024415.1_gene;TEA026408.1_gene;TEA007895.1_gene;TEA012871.1_gene;TEA001092.1_gene;TEA000623.1_gene;TEA011661.1_gene;TEA014596.1_gene;TEA026381.1_gene;TEA012277.1_gene;TEA029795.1_gene;TEA003275.1_gene;TEA004471.1_gene;TEA000792.1_gene;TEA002286.1_gene;TEA022551.1_gene;TEA003606.1_gene;TEA016181.1_gene;TEA024281.1_gene;TEA011556.1_gene;TEA01428…
MSTRG.77989.1	TEA033215.1_gene;TEA023765.1_gene;TEA013791.1_gene
MSTRG.120395.4	TEA011564.1_gene
MSTRG.104254.2	TEA022351.1_gene;TEA025705.1_gene;TEA014826.1_gene;TEA031217.1_gene;TEA017800.1_gene;TEA016963.1_gene;TEA010387.1_gene;TEA033458.1_gene;TEA027592.1_gene;TEA026046.1_gene;TEA015642.1_gene;TEA005450.1_gene;TEA025422.1_gene;TEA026961.1_gene;TEA013154.1_gene;TEA014838.1_gene;TEA026345.1_gene;TEA032094.1_gene;TEA010743.1_gene;TEA021845.1_gene;TEA021900.1_gene;TEA019234.1_gene;TEA021026.1_gene;TEA01272…
MSTRG.61952.1	TEA016765.1_gene;TEA014689.1_gene;TEA005852.1_gene;TEA012775.1_gene;TEA029475.1_gene;TEA031167.1_gene;TEA015951.1_gene;TEA029632.1_gene;TEA003955.1_gene;TEA006714.1_gene;TEA028254.1_gene;TEA004924.1_gene;TEA018785.1_gene;TEA011300.1_gene;TEA012273.1_gene;TEA011880.1_gene;TEA026406.1_gene;TEA003799.1_gene;TEA011327.1_gene;TEA014435.1_gene;TEA003584.1_gene;TEA006302.1_gene;TEA005740.1_gene;TEA03273…
MSTRG.80465.2	TEA019677.1_gene
MSTRG.50221.1	TEA019551.1_gene;TEA019536.1_gene;TEA020611.1_gene;TEA019525.1_gene;TEA024608.1_gene;TEA004212.1_gene;TEA021584.1_gene;TEA033496.1_gene;TEA003192.1_gene;TEA021504.1_gene;TEA018270.1_gene;TEA002690.1_gene;TEA031343.1_gene;TEA016394.1_gene;TEA017305.1_gene;TEA025647.1_gene;TEA005093.1_gene;TEA032924.1_gene;TEA006218.1_gene;TEA008878.1_gene;TEA018805.1_gene;TEA010025.1_gene;TEA033110.1_gene;TEA00043…
MSTRG.121525.12	TEA027795.1_gene;TEA022783.1_gene
MSTRG.66657.1	TEA008283.1_gene;TEA005615.1_gene;TEA012790.1_gene;TEA017602.1_gene;TEA021032.1_gene;TEA004204.1_gene;TEA032155.1_gene;TEA012122.1_gene;TEA026275.1_gene;TEA025961.1_gene;TEA029108.1_gene;TEA004976.1_gene;TEA001820.1_gene;TEA007234.1_gene
MSTRG.296.1	TEA016154.1_gene;TEA025647.1_gene
MSTRG.86422.1	TEA010485.1_gene
MSTRG.125203.1	TEA032906.1_gene;TEA028604.1_gene;TEA019784.1_gene
MSTRG.86716.1	TEA003898.1_gene
MSTRG.3880.1	TEA018508.1_gene;TEA023759.1_gene;TEA011828.1_gene;TEA011187.1_gene;TEA018220.1_gene;TEA008392.1_gene;TEA017172.1_gene;TEA011894.1_gene;TEA013975.1_gene;TEA028604.1_gene;TEA004158.1_gene;TEA025877.1_gene
MSTRG.54487.1	TEA001969.1_gene
MSTRG.5376.6	TEA014720.1_gene;TEA002272.1_gene;TEA012762.1_gene;TEA013074.1_gene;TEA028796.1_gene;TEA018551.1_gene;TEA015960.1_gene;TEA014552.1_gene;TEA017969.1_gene;TEA033855.1_gene;TEA028680.1_gene;TEA025378.1_gene;TEA003310.1_gene;TEA009850.1_gene;TEA013089.1_gene;TEA006858.1_gene;TEA018725.1_gene;TEA014044.1_gene;TEA021313.1_gene;TEA006996.1_gene;TEA010089.1_gene;TEA012993.1_gene;TEA018298.1_gene;TEA00999…
MSTRG.51395.1	TEA009194.1_gene;TEA022191.1_gene;TEA018729.1_gene;TEA027316.1_gene;TEA015371.1_gene;TEA023748.1_gene;TEA029511.1_gene
MSTRG.120283.29	TEA022783.1_gene;TEA003479.1_gene;TEA027795.1_gene;TEA009712.1_gene
MSTRG.104603.1	TEA018214.1_gene;TEA025093.1_gene;TEA001579.1_gene;TEA016154.1_gene;TEA025647.1_gene
MSTRG.120283.10	TEA027795.1_gene;TEA009712.1_gene
MSTRG.88124.3	TEA033038.1_gene;TEA016118.1_gene
MSTRG.12763.2	TEA008806.1_gene
MSTRG.64249.1	TEA013943.1_gene
MSTRG.46050.2	TEA027795.1_gene;TEA022783.1_gene;TEA009712.1_gene;TEA003479.1_gene
MSTRG.100265.1	TEA009011.1_gene;TEA009012.1_gene;TEA009016.1_gene;TEA032036.1_gene;TEA031175.1_gene;TEA000866.1_gene;TEA015125.1_gene
MSTRG.94044.2	TEA026637.1_gene;TEA021173.1_gene
MSTRG.72786.3	TEA015485.1_gene;TEA016154.1_gene;TEA023485.1_gene
MSTRG.145316.44	TEA027795.1_gene
MSTRG.31822.2	TEA022079.1_gene;TEA029689.1_gene;TEA016231.1_gene;TEA015112.1_gene;TEA025982.1_gene;TEA020563.1_gene;TEA022191.1_gene;TEA027316.1_gene;TEA004216.1_gene;TEA004518.1_gene;TEA027917.1_gene;TEA024014.1_gene;TEA000117.1_gene;TEA002467.1_gene;TEA022484.1_gene;TEA018775.1_gene;TEA028766.1_gene;TEA019254.1_gene;TEA033800.1_gene;TEA009213.1_gene;TEA014763.1_gene;TEA017033.1_gene;TEA031458.1_gene;TEA01239…
MSTRG.4377.1	TEA008937.1_gene;TEA008949.1_gene
MSTRG.24965.7	TEA004240.1_gene
MSTRG.63469.1	TEA016154.1_gene
MSTRG.17365.1	TEA017756.1_gene;TEA017757.1_gene;TEA018495.1_gene
MSTRG.137168.1	TEA000245.1_gene;TEA019579.1_gene
MSTRG.120065.8	TEA016231.1_gene;TEA028737.1_gene;TEA033053.1_gene;TEA022806.1_gene;TEA029659.1_gene;TEA031837.1_gene
MSTRG.148376.1	TEA007857.1_gene
MSTRG.2015.1	TEA017002.1_gene;TEA019379.1_gene;TEA027957.1_gene;TEA010555.1_gene;TEA009528.1_gene;TEA016729.1_gene;TEA029004.1_gene;TEA027445.1_gene;TEA025573.1_gene
MSTRG.140845.4	TEA032434.1_gene;TEA032432.1_gene;TEA016809.1_gene;TEA002656.1_gene;TEA012195.1_gene;TEA006740.1_gene;TEA033592.1_gene;TEA016802.1_gene;TEA033569.1_gene;TEA007533.1_gene;TEA010485.1_gene
MSTRG.96569.1	TEA022802.1_gene
MSTRG.137199.1	TEA030340.1_gene;TEA018305.1_gene
MSTRG.54440.2	TEA024707.1_gene
MSTRG.142696.1	TEA009712.1_gene;TEA004240.1_gene
MSTRG.4010.4	TEA002275.1_gene;TEA019596.1_gene;TEA015565.1_gene
MSTRG.120747.1	TEA028663.1_gene;TEA028662.1_gene;TEA005560.1_gene;TEA032890.1_gene;TEA020415.1_gene;TEA005549.1_gene;TEA020422.1_gene;TEA024277.1_gene;TEA021467.1_gene;TEA020417.1_gene;TEA032272.1_gene;TEA018230.1_gene
MSTRG.9425.1	TEA024978.1_gene
MSTRG.100801.1	TEA010263.1_gene;TEA014682.1_gene;TEA000304.1_gene;TEA028824.1_gene;TEA008392.1_gene;TEA011198.1_gene;TEA029009.1_gene;TEA018508.1_gene;TEA015961.1_gene;TEA007856.1_gene;TEA025877.1_gene;TEA011894.1_gene;TEA018220.1_gene;TEA011376.1_gene;TEA004463.1_gene
MSTRG.50720.2	TEA001721.1_gene;TEA002108.1_gene;TEA016154.1_gene;TEA025647.1_gene
MSTRG.100694.1	TEA020185.1_gene
MSTRG.5755.1	TEA000635.1_gene
MSTRG.59994.1	TEA029898.1_gene;TEA019426.1_gene;TEA010517.1_gene;TEA020022.1_gene;TEA033618.1_gene;TEA019399.1_gene
MSTRG.103063.1	TEA005118.1_gene
MSTRG.132570.15	TEA022815.1_gene;TEA025585.1_gene
MSTRG.101650.3	TEA023894.1_gene
MSTRG.51116.4	TEA025647.1_gene;TEA017305.1_gene;TEA023485.1_gene;TEA016154.1_gene;TEA021584.1_gene;TEA003766.1_gene
MSTRG.29549.1	TEA014233.1_gene
MSTRG.45130.1	TEA019845.1_gene
MSTRG.80807.2	TEA016154.1_gene;TEA025647.1_gene
MSTRG.19096.1	TEA023485.1_gene;TEA025647.1_gene;TEA016154.1_gene
MSTRG.112345.1	TEA030707.1_gene
MSTRG.104181.1	TEA002428.1_gene
MSTRG.102396.1	TEA009725.1_gene;TEA016154.1_gene;TEA025647.1_gene;TEA021584.1_gene;TEA023485.1_gene;TEA018756.1_gene
MSTRG.142925.1	TEA033451.1_gene;TEA020835.1_gene;TEA019784.1_gene
MSTRG.102188.1	TEA016633.1_gene
MSTRG.835.1	TEA027452.1_gene;TEA014289.1_gene;TEA015517.1_gene;TEA023826.1_gene;TEA007317.1_gene;TEA008506.1_gene;TEA006444.1_gene;TEA028294.1_gene;TEA018719.1_gene;TEA030505.1_gene;TEA011759.1_gene;TEA006899.1_gene;TEA021063.1_gene;TEA029167.1_gene;TEA017351.1_gene;TEA004625.1_gene;TEA025726.1_gene;TEA028595.1_gene;TEA020949.1_gene;TEA027018.1_gene;TEA011448.1_gene;TEA010948.1_gene;TEA001289.1_gene;TEA01575…
MSTRG.82473.8	TEA022783.1_gene;TEA027795.1_gene
MSTRG.38805.2	TEA019234.1_gene
MSTRG.43959.1	TEA004240.1_gene
MSTRG.134766.1	TEA000743.1_gene;TEA022543.1_gene;TEA004938.1_gene;TEA026549.1_gene;TEA021119.1_gene;TEA016885.1_gene;TEA015663.1_gene;TEA003071.1_gene;TEA028737.1_gene;TEA000618.1_gene;TEA019846.1_gene;TEA019962.1_gene;TEA023396.1_gene;TEA018362.1_gene;TEA029810.1_gene;TEA012085.1_gene;TEA008219.1_gene;TEA006769.1_gene;TEA013640.1_gene;TEA013306.1_gene;TEA010934.1_gene;TEA019271.1_gene;TEA002346.1_gene;TEA01428…
MSTRG.40526.6	TEA005011.1_gene;TEA019128.1_gene;TEA009576.1_gene;TEA006438.1_gene;TEA000291.1_gene;TEA013804.1_gene;TEA012974.1_gene;TEA030827.1_gene;TEA023615.1_gene;TEA020747.1_gene;TEA016693.1_gene;TEA015547.1_gene;TEA028116.1_gene;TEA011466.1_gene;TEA015505.1_gene;TEA008556.1_gene;TEA027742.1_gene;TEA005351.1_gene;TEA017222.1_gene;TEA000464.1_gene;TEA022018.1_gene;TEA028297.1_gene;TEA011614.1_gene
MSTRG.84365.1	TEA033451.1_gene;TEA020835.1_gene;TEA019784.1_gene;TEA003157.1_gene;TEA032906.1_gene
MSTRG.72986.1	TEA016282.1_gene;TEA027472.1_gene
MSTRG.124264.1	TEA023041.1_gene
MSTRG.4837.12	TEA027795.1_gene
MSTRG.17675.4	TEA002610.1_gene;TEA033053.1_gene
MSTRG.21796.2	TEA018508.1_gene;TEA018220.1_gene;TEA023759.1_gene;TEA011187.1_gene;TEA011828.1_gene;TEA011894.1_gene;TEA008392.1_gene;TEA032906.1_gene;TEA017172.1_gene;TEA013975.1_gene;TEA004158.1_gene;TEA025877.1_gene;TEA004463.1_gene;TEA020835.1_gene;TEA019784.1_gene;TEA011198.1_gene;TEA010263.1_gene
MSTRG.107057.1	TEA008435.1_gene;TEA015527.1_gene;TEA028874.1_gene;TEA000639.1_gene;TEA000641.1_gene;TEA005884.1_gene;TEA000643.1_gene;TEA005926.1_gene;TEA017215.1_gene;TEA003742.1_gene;TEA007551.1_gene;TEA007534.1_gene;TEA032788.1_gene;TEA008454.1_gene;TEA000685.1_gene;TEA028818.1_gene;TEA029929.1_gene;TEA022995.1_gene;TEA022993.1_gene;TEA022986.1_gene;TEA033586.1_gene
MSTRG.52430.1	TEA015371.1_gene;TEA004290.1_gene;TEA004216.1_gene;TEA027917.1_gene;TEA033089.1_gene;TEA029058.1_gene;TEA020563.1_gene;TEA021499.1_gene;TEA029397.1_gene;TEA031458.1_gene;TEA031405.1_gene;TEA015112.1_gene;TEA025046.1_gene;TEA008227.1_gene;TEA007797.1_gene;TEA022079.1_gene;TEA029130.1_gene;TEA019254.1_gene;TEA016231.1_gene;TEA022191.1_gene;TEA003540.1_gene;TEA027316.1_gene;TEA009533.1_gene;TEA02702…
MSTRG.137794.1	TEA025647.1_gene;TEA007941.1_gene;TEA004120.1_gene;TEA016154.1_gene;TEA020879.1_gene;TEA004222.1_gene
MSTRG.96071.3	TEA013098.1_gene;TEA027508.1_gene;TEA020611.1_gene;TEA018270.1_gene;TEA011029.1_gene;TEA014446.1_gene;TEA024281.1_gene;TEA017305.1_gene;TEA011930.1_gene;TEA031183.1_gene;TEA023485.1_gene;TEA025647.1_gene;TEA017516.1_gene;TEA020836.1_gene;TEA006218.1_gene;TEA021584.1_gene;TEA012995.1_gene;TEA030200.1_gene;TEA024770.1_gene;TEA006836.1_gene;TEA016154.1_gene;TEA030666.1_gene;TEA004269.1_gene
MSTRG.9637.2	TEA004546.1_gene;TEA008244.1_gene
MSTRG.121377.3	TEA009280.1_gene;TEA003317.1_gene;TEA025378.1_gene;TEA012229.1_gene;TEA009533.1_gene;TEA019711.1_gene;TEA031625.1_gene;TEA017551.1_gene;TEA033010.1_gene;TEA030097.1_gene;TEA022278.1_gene;TEA020057.1_gene;TEA014657.1_gene;TEA007742.1_gene;TEA022933.1_gene;TEA007109.1_gene;TEA005177.1_gene;TEA033381.1_gene;TEA005870.1_gene;TEA031086.1_gene;TEA028974.1_gene
MSTRG.148399.1	TEA018324.1_gene
MSTRG.101573.8	TEA027795.1_gene;TEA009712.1_gene;TEA022783.1_gene
MSTRG.113882.1	TEA002357.1_gene
MSTRG.5376.2	TEA014720.1_gene;TEA002272.1_gene;TEA012762.1_gene;TEA013074.1_gene;TEA028796.1_gene;TEA018551.1_gene;TEA015960.1_gene;TEA014552.1_gene;TEA017969.1_gene;TEA033855.1_gene;TEA028680.1_gene;TEA025378.1_gene;TEA003310.1_gene;TEA009850.1_gene;TEA013089.1_gene;TEA006858.1_gene;TEA018725.1_gene;TEA014044.1_gene;TEA021313.1_gene;TEA006996.1_gene;TEA010089.1_gene;TEA012993.1_gene;TEA018298.1_gene;TEA00999…
MSTRG.47545.1	TEA029730.1_gene;TEA013271.1_gene;TEA018826.1_gene
MSTRG.130218.1	TEA030409.1_gene;TEA017916.1_gene;TEA031086.1_gene;TEA026924.1_gene;TEA003312.1_gene;TEA003999.1_gene;TEA000986.1_gene;TEA033168.1_gene;TEA012169.1_gene;TEA027129.1_gene;TEA014901.1_gene;TEA011752.1_gene;TEA000646.1_gene;TEA017774.1_gene;TEA003273.1_gene;TEA022000.1_gene;TEA017259.1_gene
MSTRG.130958.1	TEA023485.1_gene;TEA025647.1_gene;TEA016154.1_gene
MSTRG.146627.15	TEA017450.1_gene
MSTRG.132473.1	TEA016150.1_gene
MSTRG.45474.1	TEA029218.1_gene;TEA029583.1_gene;TEA019306.1_gene;TEA015626.1_gene;TEA021751.1_gene
MSTRG.32897.1	TEA033865.1_gene;TEA020615.1_gene;TEA014268.1_gene;TEA018824.1_gene;TEA004437.1_gene;TEA014708.1_gene;TEA006901.1_gene;TEA017114.1_gene;TEA015389.1_gene;TEA001599.1_gene;TEA019054.1_gene;TEA028206.1_gene;TEA008259.1_gene;TEA015936.1_gene;TEA013429.1_gene;TEA008770.1_gene;TEA031747.1_gene;TEA014784.1_gene;TEA025287.1_gene;TEA029385.1_gene;TEA032196.1_gene;TEA006952.1_gene;TEA027655.1_gene;TEA01836…
MSTRG.83301.2	TEA020563.1_gene;TEA027316.1_gene;TEA015112.1_gene;TEA027917.1_gene;TEA028766.1_gene
MSTRG.20096.1	TEA029680.1_gene;TEA003162.1_gene
MSTRG.17377.1	TEA002723.1_gene;TEA028552.1_gene;TEA027286.1_gene;TEA023676.1_gene;TEA008872.1_gene;TEA008688.1_gene;TEA011013.1_gene
MSTRG.68708.1	TEA016154.1_gene;TEA025647.1_gene
MSTRG.153568.1	TEA016154.1_gene;TEA025647.1_gene
MSTRG.121750.2	TEA009712.1_gene
MSTRG.55982.1	TEA009605.1_gene;TEA007707.1_gene;TEA004596.1_gene;TEA002393.1_gene;TEA001087.1_gene
MSTRG.18980.1	TEA014782.1_gene;TEA029760.1_gene
MSTRG.121525.47	TEA027795.1_gene
MSTRG.21057.1	TEA009939.1_gene
MSTRG.130564.1	TEA021504.1_gene;TEA018270.1_gene;TEA031343.1_gene;TEA016394.1_gene;TEA025647.1_gene;TEA020611.1_gene;TEA004212.1_gene;TEA021584.1_gene;TEA008878.1_gene;TEA019525.1_gene;TEA024608.1_gene;TEA005093.1_gene;TEA032924.1_gene;TEA021718.1_gene;TEA018805.1_gene;TEA028803.1_gene;TEA033496.1_gene;TEA015684.1_gene;TEA003192.1_gene;TEA019551.1_gene;TEA019536.1_gene;TEA025313.1_gene;TEA024281.1_gene;TEA03402…
MSTRG.99894.3	TEA011342.1_gene;TEA004405.1_gene
MSTRG.140777.1	TEA011300.1_gene;TEA001194.1_gene
MSTRG.98173.2	TEA022191.1_gene
MSTRG.38371.1	TEA032174.1_gene;TEA028235.1_gene
MSTRG.127081.2	TEA005370.1_gene
MSTRG.153344.1	TEA017559.1_gene;TEA032066.1_gene;TEA029921.1_gene
MSTRG.59923.1	TEA026198.1_gene
MSTRG.116899.1	TEA018142.1_gene;TEA027796.1_gene;TEA013953.1_gene;TEA015970.1_gene;TEA018135.1_gene;TEA026159.1_gene;TEA029391.1_gene;TEA015257.1_gene
MSTRG.38556.1	TEA019741.1_gene
MSTRG.136581.2	TEA000877.1_gene;TEA016349.1_gene;TEA025805.1_gene
MSTRG.68594.5	TEA025781.1_gene;TEA028737.1_gene;TEA007792.1_gene;TEA001024.1_gene;TEA025777.1_gene
MSTRG.5177.1	TEA007417.1_gene;TEA025418.1_gene
MSTRG.26513.2	TEA004240.1_gene
MSTRG.145320.6	TEA004240.1_gene
MSTRG.21436.1	TEA020271.1_gene;TEA023756.1_gene;TEA028416.1_gene;TEA023600.1_gene;TEA009300.1_gene;TEA014530.1_gene;TEA028409.1_gene;TEA005504.1_gene;TEA017551.1_gene;TEA007888.1_gene;TEA033719.1_gene;TEA005543.1_gene;TEA000631.1_gene;TEA019567.1_gene;TEA030631.1_gene;TEA004464.1_gene;TEA022079.1_gene;TEA006271.1_gene;TEA033178.1_gene;TEA003277.1_gene;TEA028512.1_gene;TEA002448.1_gene;TEA020073.1_gene;TEA02104…
MSTRG.126353.2	TEA029730.1_gene;TEA013271.1_gene;TEA018826.1_gene;TEA027444.1_gene;TEA026904.1_gene;TEA021325.1_gene;TEA003732.1_gene
MSTRG.136832.1	TEA007819.1_gene;TEA009527.1_gene;TEA010109.1_gene;TEA032256.1_gene;TEA025235.1_gene
MSTRG.111024.1	TEA028737.1_gene;TEA001024.1_gene;TEA001015.1_gene;TEA025779.1_gene;TEA025777.1_gene
MSTRG.121525.34	TEA027795.1_gene;TEA022783.1_gene
MSTRG.118344.1	TEA004518.1_gene;TEA020563.1_gene;TEA015112.1_gene;TEA027917.1_gene;TEA000117.1_gene;TEA002467.1_gene;TEA022191.1_gene;TEA026582.1_gene;TEA027316.1_gene;TEA004216.1_gene;TEA022484.1_gene;TEA022079.1_gene;TEA019254.1_gene;TEA025982.1_gene;TEA028766.1_gene;TEA029689.1_gene;TEA016231.1_gene;TEA024014.1_gene;TEA018775.1_gene;TEA009352.1_gene;TEA031405.1_gene;TEA014763.1_gene;TEA004935.1_gene;TEA01703…
MSTRG.109827.1	TEA001572.1_gene
MSTRG.41458.6	TEA021504.1_gene;TEA002550.1_gene;TEA027949.1_gene;TEA004120.1_gene;TEA016154.1_gene;TEA027508.1_gene;TEA018270.1_gene;TEA024281.1_gene;TEA020227.1_gene;TEA012740.1_gene;TEA028970.1_gene;TEA012995.1_gene;TEA003766.1_gene;TEA034037.1_gene;TEA023485.1_gene;TEA025647.1_gene;TEA026230.1_gene;TEA007599.1_gene;TEA021584.1_gene;TEA010415.1_gene;TEA015371.1_gene;TEA033645.1_gene;TEA004290.1_gene;TEA02292…
MSTRG.83657.1	TEA016154.1_gene;TEA025647.1_gene
MSTRG.116134.1	TEA016154.1_gene;TEA023485.1_gene;TEA025647.1_gene
MSTRG.87590.5	TEA031315.1_gene
MSTRG.16947.1	TEA018192.1_gene;TEA003882.1_gene;TEA018174.1_gene;TEA019067.1_gene
MSTRG.119090.1	TEA023107.1_gene
MSTRG.99417.1	TEA009374.1_gene;TEA024353.1_gene
MSTRG.106064.2	TEA011549.1_gene
MSTRG.19775.1	TEA020835.1_gene;TEA033451.1_gene;TEA019784.1_gene
MSTRG.84874.14	TEA018270.1_gene;TEA025647.1_gene;TEA021584.1_gene;TEA008878.1_gene;TEA021504.1_gene;TEA019525.1_gene;TEA031343.1_gene;TEA016394.1_gene;TEA004212.1_gene;TEA032924.1_gene;TEA018805.1_gene;TEA028803.1_gene;TEA015684.1_gene;TEA024281.1_gene;TEA034026.1_gene;TEA021465.1_gene;TEA019988.1_gene;TEA014446.1_gene;TEA011930.1_gene;TEA017516.1_gene;TEA020836.1_gene;TEA007300.1_gene;TEA001194.1_gene;TEA01735…
MSTRG.141354.1	TEA005042.1_gene
MSTRG.104667.1	TEA007039.1_gene;TEA010333.1_gene
MSTRG.104204.3	TEA024552.1_gene;TEA023275.1_gene
MSTRG.41323.1	TEA023485.1_gene;TEA025647.1_gene;TEA016154.1_gene
MSTRG.62853.1	TEA015498.1_gene;TEA018846.1_gene;TEA006577.1_gene;TEA012320.1_gene;TEA019752.1_gene;TEA029874.1_gene;TEA001616.1_gene;TEA017527.1_gene;TEA022504.1_gene
MSTRG.118318.1	TEA025647.1_gene;TEA021584.1_gene;TEA023485.1_gene;TEA016154.1_gene
MSTRG.141848.1	TEA025805.1_gene
MSTRG.3896.3	TEA015416.1_gene;TEA005050.1_gene;TEA030628.1_gene;TEA005218.1_gene
MSTRG.41678.3	TEA016154.1_gene;TEA023485.1_gene;TEA025647.1_gene
MSTRG.122576.1	TEA027629.1_gene
MSTRG.54969.1	TEA009004.1_gene;TEA033207.1_gene;TEA013562.1_gene
MSTRG.121525.32	TEA027795.1_gene;TEA022783.1_gene
MSTRG.83302.1	TEA032206.1_gene;TEA005386.1_gene;TEA012421.1_gene;TEA031343.1_gene;TEA033496.1_gene;TEA021504.1_gene;TEA018270.1_gene;TEA002690.1_gene;TEA033110.1_gene;TEA025313.1_gene;TEA024281.1_gene;TEA017305.1_gene;TEA025647.1_gene;TEA007300.1_gene;TEA005093.1_gene;TEA021584.1_gene;TEA008878.1_gene;TEA027508.1_gene;TEA014446.1_gene;TEA024608.1_gene;TEA031183.1_gene;TEA017516.1_gene;TEA020836.1_gene;TEA00629…
MSTRG.90939.1	TEA006899.1_gene;TEA029167.1_gene;TEA028294.1_gene;TEA017351.1_gene;TEA007851.1_gene;TEA023826.1_gene;TEA015517.1_gene;TEA027452.1_gene;TEA025726.1_gene;TEA010948.1_gene;TEA004527.1_gene;TEA016455.1_gene
MSTRG.121525.39	TEA027795.1_gene
MSTRG.147851.1	TEA001535.1_gene;TEA033382.1_gene;TEA018324.1_gene;TEA028886.1_gene;TEA004260.1_gene
MSTRG.117311.1	TEA013870.1_gene;TEA022790.1_gene;TEA029369.1_gene;TEA000117.1_gene;TEA020563.1_gene;TEA022191.1_gene;TEA004518.1_gene;TEA015112.1_gene;TEA027917.1_gene;TEA002467.1_gene;TEA019254.1_gene;TEA027316.1_gene;TEA004216.1_gene;TEA025982.1_gene;TEA022484.1_gene;TEA028766.1_gene;TEA029689.1_gene;TEA022079.1_gene;TEA016231.1_gene;TEA024014.1_gene;TEA018775.1_gene;TEA009213.1_gene;TEA031405.1_gene;TEA00493…
MSTRG.121434.1	TEA033258.1_gene;TEA016804.1_gene;TEA000522.1_gene;TEA020652.1_gene;TEA020647.1_gene;TEA007543.1_gene;TEA025648.1_gene;TEA002656.1_gene;TEA021399.1_gene;TEA032697.1_gene;TEA023051.1_gene;TEA008872.1_gene;TEA006417.1_gene;TEA015459.1_gene;TEA023427.1_gene;TEA031620.1_gene;TEA000056.1_gene;TEA025638.1_gene;TEA016881.1_gene;TEA007439.1_gene;TEA030581.1_gene;TEA001405.1_gene;TEA003407.1_gene
MSTRG.10001.1	TEA026085.1_gene
MSTRG.15484.1	TEA003619.1_gene;TEA015320.1_gene;TEA014817.1_gene;TEA026084.1_gene;TEA025890.1_gene;TEA014854.1_gene;TEA014639.1_gene;TEA032954.1_gene;TEA028824.1_gene;TEA008015.1_gene;TEA027232.1_gene;TEA012325.1_gene;TEA010841.1_gene;TEA020700.1_gene;TEA023590.1_gene
MSTRG.4101.1	TEA021387.1_gene;TEA004355.1_gene;TEA007704.1_gene
MSTRG.42023.3	TEA033903.1_gene
MSTRG.78202.3	TEA023259.1_gene;TEA008033.1_gene;TEA020611.1_gene;TEA018805.1_gene;TEA033496.1_gene;TEA021504.1_gene;TEA018270.1_gene;TEA002690.1_gene;TEA019525.1_gene;TEA031343.1_gene;TEA033110.1_gene;TEA025313.1_gene;TEA024281.1_gene;TEA016394.1_gene;TEA017305.1_gene;TEA004212.1_gene;TEA025647.1_gene;TEA005093.1_gene;TEA021584.1_gene;TEA008878.1_gene;TEA028803.1_gene;TEA015684.1_gene;TEA003192.1_gene;TEA01998…
MSTRG.50355.1	TEA006800.1_gene
MSTRG.68117.1	TEA008589.1_gene;TEA022429.1_gene;TEA023252.1_gene
MSTRG.72032.1	TEA031351.1_gene;TEA026236.1_gene
MSTRG.29263.1	TEA001769.1_gene;TEA022110.1_gene
MSTRG.44568.3	TEA025647.1_gene;TEA016154.1_gene;TEA023485.1_gene
MSTRG.131815.2	TEA029360.1_gene;TEA028459.1_gene
MSTRG.142266.1	TEA027795.1_gene;TEA022783.1_gene
MSTRG.10714.1	TEA009973.1_gene;TEA016070.1_gene;TEA023753.1_gene;TEA026204.1_gene
MSTRG.19022.2	TEA020563.1_gene
MSTRG.128358.2	TEA027129.1_gene;TEA001939.1_gene;TEA009151.1_gene;TEA009602.1_gene;TEA010107.1_gene;TEA011752.1_gene;TEA010927.1_gene;TEA011136.1_gene;TEA017337.1_gene;TEA017259.1_gene;TEA007742.1_gene;TEA017774.1_gene;TEA024385.1_gene;TEA014901.1_gene;TEA000986.1_gene;TEA031086.1_gene
MSTRG.38955.1	TEA025648.1_gene;TEA018056.1_gene
MSTRG.93943.1	TEA000263.1_gene;TEA012732.1_gene
MSTRG.19542.1	TEA014883.1_gene;TEA033091.1_gene;TEA003735.1_gene;TEA028162.1_gene;TEA028142.1_gene
MSTRG.107806.2	TEA029408.1_gene;TEA018249.1_gene
MSTRG.115207.1	TEA013857.1_gene;TEA012739.1_gene;TEA013054.1_gene
MSTRG.5379.1	TEA004553.1_gene
MSTRG.43972.5	TEA027795.1_gene;TEA022783.1_gene
MSTRG.58425.5	TEA006800.1_gene
MSTRG.83253.2	TEA023928.1_gene
MSTRG.150733.1	TEA009712.1_gene;TEA004240.1_gene
MSTRG.36809.1	TEA001344.1_gene
MSTRG.131425.1	TEA023821.1_gene;TEA010926.1_gene
MSTRG.116653.1	TEA030898.1_gene;TEA026649.1_gene;TEA024273.1_gene;TEA004343.1_gene;TEA006740.1_gene
MSTRG.114091.1	TEA005928.1_gene;TEA017354.1_gene;TEA021492.1_gene;TEA032532.1_gene;TEA030129.1_gene
MSTRG.140922.1	TEA006266.1_gene
MSTRG.24577.1	TEA012104.1_gene
MSTRG.69276.1	TEA031000.1_gene
MSTRG.120284.25	TEA004240.1_gene
MSTRG.75610.1	TEA011029.1_gene;TEA033110.1_gene;TEA031183.1_gene;TEA021504.1_gene;TEA021492.1_gene;TEA007779.1_gene;TEA016394.1_gene;TEA032924.1_gene;TEA008878.1_gene;TEA030200.1_gene;TEA018805.1_gene;TEA001683.1_gene;TEA025313.1_gene;TEA024281.1_gene;TEA018601.1_gene;TEA011930.1_gene;TEA025647.1_gene;TEA011033.1_gene;TEA004833.1_gene;TEA022825.1_gene;TEA032989.1_gene;TEA028334.1_gene;TEA033496.1_gene;TEA00319…
MSTRG.37048.1	TEA017428.1_gene
MSTRG.138134.1	TEA028202.1_gene
MSTRG.122572.1	TEA016394.1_gene;TEA033496.1_gene;TEA031343.1_gene;TEA024281.1_gene;TEA010415.1_gene;TEA020611.1_gene;TEA021504.1_gene;TEA018270.1_gene;TEA019525.1_gene;TEA017305.1_gene;TEA004212.1_gene;TEA025647.1_gene;TEA005093.1_gene;TEA032924.1_gene;TEA021584.1_gene;TEA001194.1_gene;TEA008878.1_gene;TEA018805.1_gene;TEA015684.1_gene;TEA002690.1_gene;TEA033110.1_gene;TEA025313.1_gene;TEA034026.1_gene;TEA00803…
MSTRG.50438.1	TEA012406.1_gene;TEA012404.1_gene;TEA022775.1_gene;TEA001232.1_gene;TEA009593.1_gene;TEA011611.1_gene;TEA026461.1_gene;TEA022892.1_gene;TEA019523.1_gene;TEA026973.1_gene;TEA001242.1_gene;TEA028169.1_gene;TEA028158.1_gene;TEA033900.1_gene;TEA023008.1_gene;TEA017117.1_gene;TEA016394.1_gene;TEA029149.1_gene;TEA026599.1_gene;TEA026415.1_gene;TEA029511.1_gene;TEA020570.1_gene;TEA012392.1_gene;TEA01042…
MSTRG.139315.1	TEA023966.1_gene
MSTRG.99001.2	TEA016222.1_gene;TEA004015.1_gene
MSTRG.1922.5	TEA004240.1_gene
MSTRG.101063.1	TEA024591.1_gene
MSTRG.109508.2	TEA018508.1_gene;TEA018220.1_gene;TEA023759.1_gene;TEA011828.1_gene;TEA011187.1_gene;TEA013975.1_gene;TEA008392.1_gene;TEA011894.1_gene;TEA028604.1_gene;TEA017172.1_gene;TEA004158.1_gene;TEA010263.1_gene;TEA025877.1_gene
MSTRG.148256.1	TEA001333.1_gene;TEA013446.1_gene
MSTRG.92594.1	TEA005609.1_gene
MSTRG.72722.5	TEA001467.1_gene
MSTRG.49259.1	TEA014219.1_gene;TEA023074.1_gene;TEA000877.1_gene
MSTRG.92332.1	TEA011729.1_gene;TEA016192.1_gene;TEA003424.1_gene;TEA033773.1_gene
MSTRG.99894.8	TEA011342.1_gene;TEA004405.1_gene
MSTRG.150730.7	TEA027795.1_gene
MSTRG.150724.2	TEA023485.1_gene;TEA025647.1_gene;TEA016154.1_gene
MSTRG.96243.3	TEA025771.1_gene
MSTRG.52623.1	TEA005042.1_gene
MSTRG.67029.1	TEA014472.1_gene;TEA018611.1_gene;TEA032663.1_gene;TEA000995.1_gene;TEA003635.1_gene;TEA025083.1_gene;TEA004991.1_gene;TEA024694.1_gene;TEA020266.1_gene;TEA011151.1_gene;TEA012281.1_gene;TEA016529.1_gene
MSTRG.99810.1	TEA004149.1_gene;TEA009163.1_gene;TEA018056.1_gene
MSTRG.73812.1	TEA013080.1_gene
MSTRG.27645.5	TEA023485.1_gene;TEA025647.1_gene;TEA016154.1_gene
MSTRG.120049.1	TEA007672.1_gene;TEA033264.1_gene;TEA032434.1_gene;TEA033267.1_gene;TEA002656.1_gene
MSTRG.44919.1	TEA025647.1_gene;TEA021584.1_gene;TEA023485.1_gene;TEA016154.1_gene
MSTRG.93981.1	TEA025647.1_gene;TEA021584.1_gene;TEA023485.1_gene;TEA016154.1_gene
MSTRG.21501.2	TEA023485.1_gene;TEA025647.1_gene;TEA016154.1_gene
MSTRG.1413.1	TEA003428.1_gene;TEA018925.1_gene;TEA001254.1_gene;TEA014438.1_gene
MSTRG.38310.1	TEA007610.1_gene;TEA004867.1_gene;TEA020876.1_gene;TEA000250.1_gene;TEA026549.1_gene;TEA007883.1_gene;TEA004434.1_gene;TEA024571.1_gene;TEA026685.1_gene;TEA019080.1_gene;TEA032481.1_gene;TEA005704.1_gene;TEA006186.1_gene;TEA010551.1_gene;TEA001013.1_gene;TEA000926.1_gene;TEA033456.1_gene;TEA014089.1_gene;TEA030390.1_gene;TEA018362.1_gene;TEA005301.1_gene;TEA030453.1_gene;TEA025805.1_gene;TEA01060…
MSTRG.55308.1	TEA028604.1_gene;TEA032906.1_gene;TEA020835.1_gene;TEA019784.1_gene;TEA033451.1_gene;TEA003157.1_gene;TEA011198.1_gene;TEA020075.1_gene;TEA018462.1_gene;TEA002926.1_gene;TEA014015.1_gene;TEA018045.1_gene;TEA029885.1_gene;TEA012644.1_gene;TEA020236.1_gene;TEA020986.1_gene;TEA029516.1_gene;TEA018876.1_gene;TEA004725.1_gene
MSTRG.150730.11	TEA027795.1_gene;TEA022783.1_gene
MSTRG.18649.2	TEA030882.1_gene;TEA033590.1_gene;TEA019609.1_gene;TEA011365.1_gene;TEA021823.1_gene;TEA019999.1_gene;TEA024457.1_gene;TEA030397.1_gene;TEA010094.1_gene;TEA016605.1_gene;TEA000032.1_gene;TEA030902.1_gene;TEA017562.1_gene;TEA033174.1_gene;TEA012423.1_gene;TEA017441.1_gene;TEA029179.1_gene;TEA009017.1_gene;TEA014653.1_gene;TEA018741.1_gene;TEA032895.1_gene;TEA004951.1_gene;TEA014638.1_gene;TEA02209…
MSTRG.152841.2	TEA023756.1_gene;TEA023600.1_gene;TEA020271.1_gene;TEA014530.1_gene;TEA017551.1_gene;TEA009300.1_gene;TEA005504.1_gene;TEA028416.1_gene;TEA013023.1_gene;TEA033719.1_gene;TEA007888.1_gene;TEA028409.1_gene;TEA000631.1_gene;TEA030631.1_gene;TEA005543.1_gene;TEA019567.1_gene;TEA006271.1_gene;TEA028512.1_gene;TEA022079.1_gene;TEA003277.1_gene;TEA021046.1_gene;TEA033178.1_gene;TEA020073.1_gene;TEA00244…
MSTRG.16951.1	TEA028886.1_gene;TEA004260.1_gene;TEA033382.1_gene;TEA013687.1_gene
MSTRG.79089.3	TEA006452.1_gene
MSTRG.141438.1	TEA029880.1_gene
MSTRG.79776.1	TEA011313.1_gene;TEA017980.1_gene;TEA031423.1_gene;TEA022711.1_gene;TEA003442.1_gene;TEA025319.1_gene;TEA000253.1_gene;TEA006156.1_gene
MSTRG.145320.13	TEA004240.1_gene
MSTRG.90062.1	TEA025647.1_gene;TEA021584.1_gene;TEA023485.1_gene;TEA016154.1_gene
MSTRG.23572.1	TEA022310.1_gene;TEA029412.1_gene
MSTRG.150769.1	TEA007945.1_gene;TEA032390.1_gene;TEA007941.1_gene;TEA013709.1_gene;TEA032392.1_gene;TEA022579.1_gene;TEA011312.1_gene;TEA032781.1_gene;TEA003482.1_gene;TEA004083.1_gene;TEA013636.1_gene;TEA007956.1_gene;TEA032391.1_gene;TEA010597.1_gene;TEA010580.1_gene;TEA002110.1_gene
MSTRG.23371.1	TEA015425.1_gene;TEA021768.1_gene;TEA010703.1_gene;TEA025664.1_gene;TEA000774.1_gene;TEA014375.1_gene;TEA014710.1_gene;TEA033730.1_gene;TEA024045.1_gene;TEA002622.1_gene;TEA000090.1_gene;TEA021119.1_gene;TEA004938.1_gene;TEA012558.1_gene;TEA021496.1_gene;TEA012616.1_gene;TEA026549.1_gene;TEA020870.1_gene;TEA012115.1_gene;TEA006050.1_gene;TEA000926.1_gene;TEA019080.1_gene;TEA030390.1_gene;TEA00570…
MSTRG.25405.6	TEA028975.1_gene
MSTRG.99318.2	TEA021720.1_gene
MSTRG.93964.3	TEA006428.1_gene;TEA013662.1_gene;TEA002565.1_gene
MSTRG.112099.1	TEA011894.1_gene;TEA003157.1_gene;TEA018220.1_gene;TEA018508.1_gene;TEA008392.1_gene;TEA020835.1_gene;TEA011198.1_gene;TEA024384.1_gene;TEA026894.1_gene
MSTRG.127688.1	TEA017337.1_gene
MSTRG.89078.1	TEA019551.1_gene;TEA020611.1_gene;TEA019525.1_gene;TEA004212.1_gene;TEA021504.1_gene;TEA018270.1_gene;TEA019536.1_gene;TEA031343.1_gene;TEA016394.1_gene;TEA034026.1_gene;TEA017305.1_gene;TEA025647.1_gene;TEA005093.1_gene;TEA008033.1_gene;TEA032924.1_gene;TEA008878.1_gene;TEA018805.1_gene;TEA001690.1_gene;TEA033496.1_gene;TEA025313.1_gene;TEA024281.1_gene;TEA033279.1_gene;TEA017516.1_gene;TEA02171…
MSTRG.93781.1	TEA008488.1_gene;TEA003741.1_gene;TEA027502.1_gene;TEA031714.1_gene;TEA010793.1_gene;TEA010371.1_gene;TEA009761.1_gene;TEA009546.1_gene;TEA008224.1_gene;TEA018181.1_gene;TEA001197.1_gene;TEA014323.1_gene
MSTRG.108935.1	TEA011387.1_gene
MSTRG.2583.2	TEA011636.1_gene
MSTRG.121351.1	TEA019254.1_gene;TEA015112.1_gene;TEA020563.1_gene;TEA028766.1_gene;TEA029689.1_gene;TEA017033.1_gene;TEA016231.1_gene;TEA004216.1_gene;TEA009213.1_gene;TEA031405.1_gene;TEA027917.1_gene;TEA000117.1_gene;TEA018775.1_gene;TEA022079.1_gene;TEA022191.1_gene;TEA003540.1_gene;TEA027316.1_gene;TEA009533.1_gene;TEA004518.1_gene;TEA024014.1_gene;TEA025982.1_gene;TEA002467.1_gene;TEA003087.1_gene;TEA02658…
MSTRG.18785.3	TEA027795.1_gene;TEA022783.1_gene;TEA009712.1_gene;TEA003479.1_gene;TEA022309.1_gene
MSTRG.55276.1	TEA026956.1_gene
MSTRG.31309.1	TEA020563.1_gene;TEA027316.1_gene;TEA015112.1_gene;TEA027917.1_gene;TEA008227.1_gene;TEA015515.1_gene;TEA030547.1_gene;TEA033520.1_gene
MSTRG.32898.1	TEA033865.1_gene
MSTRG.149068.1	TEA030241.1_gene;TEA025726.1_gene;TEA026154.1_gene;TEA022426.1_gene;TEA013649.1_gene;TEA007317.1_gene
MSTRG.70757.1	TEA019670.1_gene
MSTRG.18399.4	TEA027795.1_gene;TEA022783.1_gene
MSTRG.150730.12	TEA027795.1_gene;TEA022783.1_gene
MSTRG.83400.1	TEA006855.1_gene;TEA013918.1_gene
MSTRG.70244.1	TEA005130.1_gene
MSTRG.72784.1	TEA025647.1_gene;TEA023485.1_gene;TEA021584.1_gene;TEA016154.1_gene
MSTRG.59162.1	TEA011539.1_gene;TEA022974.1_gene
MSTRG.127939.1	TEA032041.1_gene;TEA008147.1_gene
MSTRG.108435.1	TEA021504.1_gene;TEA016394.1_gene;TEA025647.1_gene;TEA018270.1_gene;TEA024281.1_gene;TEA019536.1_gene;TEA021718.1_gene;TEA021584.1_gene;TEA024608.1_gene;TEA007779.1_gene;TEA033645.1_gene;TEA016154.1_gene;TEA023485.1_gene;TEA027581.1_gene;TEA027869.1_gene;TEA022720.1_gene;TEA006081.1_gene
MSTRG.4001.1	TEA025647.1_gene;TEA021584.1_gene;TEA023485.1_gene;TEA016154.1_gene
MSTRG.81947.11	TEA016687.1_gene;TEA007331.1_gene;TEA016154.1_gene;TEA023485.1_gene;TEA025647.1_gene
MSTRG.15386.2	TEA011616.1_gene;TEA012330.1_gene;TEA029040.1_gene;TEA013587.1_gene;TEA032218.1_gene;TEA004162.1_gene;TEA012875.1_gene;TEA025331.1_gene;TEA002726.1_gene;TEA005208.1_gene;TEA019393.1_gene;TEA024820.1_gene;TEA005150.1_gene;TEA007856.1_gene;TEA011764.1_gene;TEA022703.1_gene;TEA015305.1_gene;TEA011221.1_gene;TEA014682.1_gene;TEA010592.1_gene;TEA010263.1_gene;TEA015961.1_gene;TEA010111.1_gene;TEA02882…
MSTRG.106242.1	TEA009602.1_gene;TEA001774.1_gene;TEA006468.1_gene
MSTRG.2174.1	TEA025093.1_gene;TEA011223.1_gene;TEA020523.1_gene;TEA003714.1_gene;TEA025551.1_gene;TEA001579.1_gene;TEA016154.1_gene;TEA023485.1_gene;TEA025647.1_gene;TEA021584.1_gene
MSTRG.11189.1	TEA000757.1_gene
MSTRG.63688.1	TEA024694.1_gene
MSTRG.126206.1	TEA021584.1_gene;TEA023485.1_gene;TEA025647.1_gene;TEA016154.1_gene
MSTRG.105981.1	TEA032766.1_gene
MSTRG.151738.3	TEA020262.1_gene;TEA006848.1_gene
MSTRG.31314.2	TEA020041.1_gene;TEA021856.1_gene;TEA032943.1_gene
MSTRG.73783.1	TEA001338.1_gene;TEA007477.1_gene;TEA010348.1_gene;TEA031268.1_gene;TEA016154.1_gene
MSTRG.127443.5	TEA025647.1_gene;TEA021584.1_gene;TEA004833.1_gene;TEA023485.1_gene;TEA016154.1_gene
MSTRG.33672.1	TEA016210.1_gene;TEA030697.1_gene;TEA028513.1_gene
MSTRG.40760.1	TEA032776.1_gene
MSTRG.133887.1	TEA023485.1_gene;TEA025647.1_gene;TEA021584.1_gene;TEA016154.1_gene
MSTRG.142304.1	TEA014353.1_gene;TEA003109.1_gene;TEA001527.1_gene
MSTRG.40942.2	TEA023211.1_gene
MSTRG.146176.3	TEA016154.1_gene;TEA025647.1_gene
MSTRG.4078.1	TEA013499.1_gene
MSTRG.46048.9	TEA009712.1_gene
MSTRG.108582.1	TEA026972.1_gene;TEA008217.1_gene;TEA007636.1_gene;TEA025106.1_gene;TEA031344.1_gene;TEA019277.1_gene;TEA006783.1_gene;TEA001839.1_gene;TEA007602.1_gene;TEA018529.1_gene;TEA028150.1_gene;TEA023630.1_gene;TEA000455.1_gene;TEA017632.1_gene
MSTRG.117104.2	TEA024653.1_gene;TEA027892.1_gene;TEA014449.1_gene
MSTRG.151236.1	TEA033477.1_gene
MSTRG.125254.2	TEA002560.1_gene
MSTRG.43668.1	TEA011089.1_gene
MSTRG.121474.7	TEA022783.1_gene;TEA027795.1_gene
MSTRG.71802.1	TEA028237.1_gene;TEA004212.1_gene;TEA020611.1_gene;TEA016394.1_gene;TEA025647.1_gene;TEA005093.1_gene;TEA032924.1_gene;TEA024608.1_gene;TEA033279.1_gene;TEA017516.1_gene;TEA021584.1_gene;TEA003192.1_gene;TEA011930.1_gene;TEA004833.1_gene;TEA027508.1_gene;TEA032544.1_gene;TEA009805.1_gene;TEA023485.1_gene;TEA016154.1_gene
MSTRG.120284.1	TEA004240.1_gene
MSTRG.103554.1	TEA013333.1_gene;TEA006641.1_gene;TEA029324.1_gene;TEA004030.1_gene
MSTRG.80188.1	TEA033746.1_gene;TEA025947.1_gene;TEA024220.1_gene;TEA017380.1_gene;TEA032032.1_gene;TEA015534.1_gene;TEA028240.1_gene;TEA025296.1_gene;TEA003215.1_gene;TEA011503.1_gene
MSTRG.2468.1	TEA020611.1_gene;TEA018270.1_gene;TEA004212.1_gene;TEA025647.1_gene;TEA021504.1_gene;TEA031343.1_gene;TEA016394.1_gene;TEA005093.1_gene;TEA008878.1_gene;TEA019525.1_gene;TEA017305.1_gene;TEA032924.1_gene;TEA006218.1_gene;TEA018805.1_gene;TEA003192.1_gene;TEA024281.1_gene;TEA021584.1_gene;TEA033110.1_gene;TEA014446.1_gene;TEA024608.1_gene;TEA007300.1_gene;TEA019988.1_gene;TEA019536.1_gene;TEA01193…
MSTRG.92784.11	TEA028799.1_gene;TEA018181.1_gene
MSTRG.134438.1	TEA013384.1_gene;TEA000380.1_gene;TEA033782.1_gene;TEA015674.1_gene;TEA014206.1_gene
MSTRG.62766.1	TEA005328.1_gene;TEA007293.1_gene
MSTRG.85567.1	TEA023799.1_gene
MSTRG.55452.1	TEA025647.1_gene;TEA016154.1_gene
MSTRG.6370.1	TEA009018.1_gene
MSTRG.56229.1	TEA018686.1_gene;TEA018684.1_gene;TEA006463.1_gene;TEA006456.1_gene;TEA014916.1_gene
MSTRG.93360.1	TEA008989.1_gene;TEA006939.1_gene
MSTRG.18714.1	TEA027482.1_gene;TEA030889.1_gene;TEA016748.1_gene
MSTRG.120538.1	TEA026888.1_gene
MSTRG.117257.1	TEA011540.1_gene;TEA011537.1_gene;TEA020876.1_gene;TEA020983.1_gene
MSTRG.81874.1	TEA012141.1_gene;TEA018968.1_gene;TEA017869.1_gene;TEA011941.1_gene;TEA028348.1_gene;TEA016789.1_gene;TEA027559.1_gene;TEA029187.1_gene;TEA012540.1_gene;TEA011554.1_gene;TEA003731.1_gene;TEA006666.1_gene;TEA012848.1_gene
MSTRG.99318.1	TEA021720.1_gene
MSTRG.116528.1	TEA013067.1_gene;TEA032352.1_gene;TEA029014.1_gene;TEA015658.1_gene;TEA018541.1_gene;TEA015973.1_gene;TEA020218.1_gene;TEA003060.1_gene;TEA010336.1_gene
MSTRG.121601.1	TEA009257.1_gene;TEA016142.1_gene;TEA005764.1_gene
MSTRG.49846.1	TEA012197.1_gene;TEA006136.1_gene;TEA018454.1_gene;TEA021353.1_gene;TEA011256.1_gene;TEA020573.1_gene
MSTRG.60486.3	TEA016154.1_gene;TEA025647.1_gene
MSTRG.82254.2	TEA007205.1_gene;TEA016897.1_gene;TEA006298.1_gene;TEA008901.1_gene;TEA006557.1_gene;TEA025270.1_gene
MSTRG.106204.2	TEA023117.1_gene;TEA029149.1_gene;TEA017125.1_gene;TEA006829.1_gene;TEA032359.1_gene;TEA011223.1_gene;TEA025093.1_gene;TEA006955.1_gene;TEA004484.1_gene;TEA023529.1_gene;TEA011734.1_gene;TEA027047.1_gene;TEA023319.1_gene;TEA009235.1_gene;TEA006559.1_gene;TEA030873.1_gene;TEA011752.1_gene;TEA027084.1_gene
MSTRG.134416.4	TEA003274.1_gene;TEA001691.1_gene;TEA024198.1_gene;TEA029724.1_gene;TEA004250.1_gene;TEA020273.1_gene;TEA020900.1_gene;TEA031242.1_gene;TEA015175.1_gene;TEA018999.1_gene;TEA007888.1_gene;TEA023760.1_gene;TEA009289.1_gene;TEA024052.1_gene;TEA009600.1_gene;TEA014340.1_gene;TEA016329.1_gene;TEA009065.1_gene;TEA013133.1_gene;TEA023600.1_gene;TEA011238.1_gene;TEA027632.1_gene;TEA004761.1_gene;TEA00549…
MSTRG.128615.1	TEA028883.1_gene
MSTRG.112071.1	TEA025647.1_gene;TEA021584.1_gene;TEA023485.1_gene;TEA012848.1_gene;TEA016154.1_gene
MSTRG.109081.4	TEA015827.1_gene
MSTRG.152790.1	TEA028382.1_gene
MSTRG.137259.4	TEA025348.1_gene;TEA025254.1_gene;TEA031300.1_gene
MSTRG.16813.1	TEA016718.1_gene;TEA009422.1_gene
MSTRG.72786.4	TEA015485.1_gene;TEA016154.1_gene;TEA023485.1_gene
MSTRG.23179.2	TEA023600.1_gene;TEA008021.1_gene;TEA017551.1_gene;TEA023756.1_gene;TEA005504.1_gene;TEA033719.1_gene;TEA014530.1_gene;TEA020271.1_gene;TEA028416.1_gene;TEA007888.1_gene;TEA009300.1_gene;TEA013023.1_gene;TEA028512.1_gene;TEA006271.1_gene;TEA021046.1_gene;TEA022079.1_gene;TEA028409.1_gene;TEA020073.1_gene;TEA005363.1_gene;TEA033178.1_gene;TEA026024.1_gene;TEA005543.1_gene;TEA019567.1_gene
MSTRG.70665.1	TEA023485.1_gene;TEA025647.1_gene;TEA004833.1_gene;TEA016154.1_gene
MSTRG.116859.2	TEA033428.1_gene;TEA033431.1_gene
MSTRG.115165.1	TEA022623.1_gene;TEA004260.1_gene;TEA024426.1_gene;TEA002948.1_gene;TEA033382.1_gene;TEA032802.1_gene;TEA001535.1_gene;TEA015695.1_gene;TEA019360.1_gene;TEA024854.1_gene;TEA001588.1_gene;TEA016077.1_gene;TEA023372.1_gene
MSTRG.31538.2	TEA019257.1_gene;TEA030309.1_gene;TEA016080.1_gene;TEA024405.1_gene;TEA007017.1_gene
MSTRG.78937.2	TEA020876.1_gene;TEA000671.1_gene;TEA017363.1_gene
MSTRG.85648.2	TEA033715.1_gene
MSTRG.93528.1	TEA008063.1_gene;TEA020689.1_gene;TEA005104.1_gene;TEA024955.1_gene;TEA029014.1_gene;TEA019538.1_gene;TEA031678.1_gene;TEA018543.1_gene;TEA017705.1_gene;TEA030547.1_gene;TEA028606.1_gene;TEA008223.1_gene
MSTRG.46091.1	TEA029796.1_gene;TEA028681.1_gene
MSTRG.115731.1	TEA001165.1_gene;TEA000706.1_gene
MSTRG.107790.1	TEA029411.1_gene;TEA028433.1_gene;TEA028423.1_gene;TEA028435.1_gene;TEA011882.1_gene;TEA006466.1_gene;TEA006710.1_gene;TEA006699.1_gene;TEA008543.1_gene;TEA005214.1_gene;TEA000375.1_gene
MSTRG.44416.1	TEA029435.1_gene;TEA031874.1_gene;TEA030898.1_gene;TEA009489.1_gene;TEA009488.1_gene
MSTRG.50030.1	TEA016308.1_gene;TEA013168.1_gene;TEA031411.1_gene;TEA009583.1_gene;TEA030515.1_gene;TEA024879.1_gene;TEA007348.1_gene;TEA009564.1_gene
MSTRG.29449.1	TEA020721.1_gene;TEA020717.1_gene;TEA020719.1_gene
MSTRG.84260.2	TEA001381.1_gene
MSTRG.113353.1	TEA020835.1_gene;TEA025877.1_gene;TEA018508.1_gene;TEA010263.1_gene;TEA018220.1_gene;TEA033451.1_gene;TEA011894.1_gene;TEA008392.1_gene;TEA011198.1_gene;TEA019784.1_gene;TEA014682.1_gene
MSTRG.76278.1	TEA018508.1_gene;TEA018220.1_gene;TEA008392.1_gene;TEA023759.1_gene;TEA011828.1_gene;TEA013975.1_gene;TEA011187.1_gene;TEA017172.1_gene;TEA004158.1_gene;TEA011894.1_gene;TEA025877.1_gene;TEA010263.1_gene;TEA000304.1_gene;TEA014682.1_gene;TEA004463.1_gene;TEA020835.1_gene
MSTRG.68376.1	TEA020743.1_gene;TEA009565.1_gene;TEA004567.1_gene;TEA032929.1_gene
MSTRG.38016.1	TEA001194.1_gene;TEA004165.1_gene;TEA000859.1_gene;TEA016154.1_gene;TEA011606.1_gene;TEA018601.1_gene;TEA008641.1_gene
MSTRG.39862.1	TEA024169.1_gene;TEA021504.1_gene;TEA020879.1_gene;TEA027949.1_gene;TEA016394.1_gene;TEA032924.1_gene;TEA008878.1_gene;TEA020611.1_gene;TEA018270.1_gene;TEA019525.1_gene;TEA031343.1_gene;TEA033110.1_gene;TEA004212.1_gene;TEA025647.1_gene;TEA008033.1_gene;TEA005093.1_gene;TEA018805.1_gene;TEA002690.1_gene;TEA025313.1_gene;TEA024281.1_gene;TEA034026.1_gene;TEA024608.1_gene;TEA017516.1_gene;TEA00621…
MSTRG.108410.7	TEA029218.1_gene;TEA015626.1_gene;TEA019306.1_gene;TEA002491.1_gene;TEA021751.1_gene
MSTRG.2010.1	TEA028459.1_gene;TEA029360.1_gene
MSTRG.3463.1	TEA012033.1_gene;TEA012035.1_gene;TEA019752.1_gene
MSTRG.31314.3	TEA020041.1_gene;TEA021856.1_gene;TEA032943.1_gene;TEA029072.1_gene;TEA010668.1_gene
MSTRG.73952.1	TEA027112.1_gene
MSTRG.118575.2	TEA029917.1_gene
MSTRG.28429.3	TEA025647.1_gene;TEA021584.1_gene;TEA021492.1_gene;TEA004833.1_gene;TEA023485.1_gene;TEA016154.1_gene
MSTRG.80533.2	TEA029730.1_gene
MSTRG.105761.1	TEA011657.1_gene;TEA012736.1_gene;TEA029837.1_gene;TEA001499.1_gene
MSTRG.135297.2	TEA017974.1_gene
MSTRG.93364.1	TEA025805.1_gene;TEA002228.1_gene
MSTRG.67866.1	TEA025647.1_gene;TEA021584.1_gene;TEA016154.1_gene;TEA023485.1_gene
MSTRG.87569.1	TEA015171.1_gene
MSTRG.26954.2	TEA027795.1_gene;TEA022783.1_gene
MSTRG.64108.1	TEA004873.1_gene;TEA020062.1_gene;TEA009746.1_gene;TEA021872.1_gene;TEA010765.1_gene;TEA000371.1_gene;TEA029011.1_gene;TEA005245.1_gene;TEA004874.1_gene;TEA004876.1_gene;TEA005244.1_gene;TEA009849.1_gene;TEA022250.1_gene;TEA006076.1_gene;TEA023107.1_gene;TEA030113.1_gene;TEA009741.1_gene
MSTRG.17266.8	TEA009712.1_gene;TEA027795.1_gene
MSTRG.141044.1	TEA029009.1_gene;TEA025176.1_gene;TEA011522.1_gene;TEA017958.1_gene;TEA029360.1_gene;TEA008537.1_gene;TEA012729.1_gene
MSTRG.20867.8	TEA023592.1_gene;TEA020563.1_gene;TEA031405.1_gene;TEA027917.1_gene;TEA030547.1_gene;TEA028976.1_gene;TEA007797.1_gene;TEA011883.1_gene;TEA023619.1_gene;TEA023603.1_gene;TEA007823.1_gene;TEA027451.1_gene;TEA027316.1_gene;TEA021418.1_gene;TEA009125.1_gene;TEA029250.1_gene;TEA028160.1_gene;TEA029963.1_gene;TEA021652.1_gene;TEA021647.1_gene;TEA032049.1_gene;TEA001075.1_gene;TEA021549.1_gene;TEA01511…
MSTRG.75064.1	TEA013614.1_gene;TEA012415.1_gene;TEA015413.1_gene;TEA029857.1_gene;TEA032695.1_gene;TEA030964.1_gene;TEA007180.1_gene;TEA010336.1_gene;TEA024866.1_gene;TEA019054.1_gene;TEA028395.1_gene;TEA013067.1_gene;TEA002802.1_gene;TEA029963.1_gene;TEA015515.1_gene;TEA023502.1_gene;TEA019931.1_gene;TEA013136.1_gene;TEA015471.1_gene;TEA004208.1_gene;TEA000155.1_gene;TEA033558.1_gene
MSTRG.123311.5	TEA000793.1_gene;TEA000791.1_gene;TEA025647.1_gene;TEA021584.1_gene;TEA023485.1_gene;TEA016154.1_gene
MSTRG.151698.1	TEA018508.1_gene;TEA018220.1_gene;TEA008392.1_gene;TEA013975.1_gene;TEA012330.1_gene;TEA008385.1_gene;TEA011828.1_gene;TEA011187.1_gene;TEA017172.1_gene;TEA023759.1_gene;TEA010263.1_gene;TEA005208.1_gene;TEA004162.1_gene;TEA004158.1_gene;TEA015305.1_gene
MSTRG.60504.1	TEA031856.1_gene
MSTRG.65833.2	TEA018122.1_gene;TEA024685.1_gene;TEA015590.1_gene
MSTRG.75931.2	TEA007468.1_gene;TEA018045.1_gene;TEA015614.1_gene
MSTRG.132205.1	TEA002656.1_gene;TEA032434.1_gene;TEA033592.1_gene;TEA016809.1_gene;TEA032432.1_gene;TEA006740.1_gene;TEA016802.1_gene;TEA012195.1_gene;TEA017450.1_gene;TEA033004.1_gene;TEA018910.1_gene;TEA002308.1_gene;TEA026531.1_gene;TEA002052.1_gene;TEA028936.1_gene;TEA025654.1_gene;TEA016359.1_gene;TEA033370.1_gene;TEA015101.1_gene;TEA018036.1_gene;TEA029362.1_gene;TEA009644.1_gene;TEA012395.1_gene;TEA00492…
MSTRG.121512.1	TEA010763.1_gene;TEA027782.1_gene;TEA009482.1_gene;TEA024509.1_gene;TEA020641.1_gene;TEA004790.1_gene;TEA030693.1_gene;TEA007577.1_gene
MSTRG.40990.2	TEA013288.1_gene
MSTRG.2595.3	TEA015907.1_gene;TEA005212.1_gene
MSTRG.98766.1	TEA031128.1_gene;TEA029173.1_gene;TEA031619.1_gene;TEA008762.1_gene;TEA029050.1_gene;TEA026745.1_gene;TEA008204.1_gene;TEA007510.1_gene;TEA025274.1_gene
MSTRG.16263.1	TEA029718.1_gene;TEA029724.1_gene;TEA025257.1_gene;TEA021923.1_gene;TEA027231.1_gene;TEA008608.1_gene;TEA008603.1_gene;TEA008600.1_gene;TEA023200.1_gene;TEA012405.1_gene;TEA027204.1_gene;TEA014499.1_gene;TEA010485.1_gene;TEA031376.1_gene;TEA002566.1_gene;TEA022579.1_gene;TEA013636.1_gene;TEA012154.1_gene;TEA027842.1_gene;TEA003482.1_gene;TEA012874.1_gene;TEA012536.1_gene;TEA028182.1_gene;TEA00956…
MSTRG.709.1	TEA016154.1_gene;TEA023485.1_gene;TEA025647.1_gene
MSTRG.144516.1	TEA004658.1_gene
MSTRG.143758.1	TEA016154.1_gene;TEA013403.1_gene;TEA022741.1_gene;TEA023485.1_gene;TEA025647.1_gene
MSTRG.46728.1	TEA004125.1_gene;TEA027190.1_gene;TEA001774.1_gene;TEA030135.1_gene;TEA022429.1_gene;TEA023252.1_gene;TEA006468.1_gene;TEA029882.1_gene;TEA024319.1_gene;TEA030841.1_gene
MSTRG.92805.1	TEA006046.1_gene;TEA014122.1_gene;TEA014278.1_gene;TEA015788.1_gene;TEA024282.1_gene;TEA021628.1_gene;TEA023048.1_gene;TEA026944.1_gene;TEA003702.1_gene
MSTRG.69519.1	TEA024353.1_gene;TEA009374.1_gene
MSTRG.118022.1	TEA020692.1_gene;TEA023485.1_gene;TEA025647.1_gene;TEA016154.1_gene
MSTRG.133485.8	TEA002090.1_gene
MSTRG.4837.16	TEA027795.1_gene
MSTRG.2694.3	TEA027795.1_gene;TEA022783.1_gene
MSTRG.117858.1	TEA016154.1_gene
MSTRG.40157.1	TEA019257.1_gene
MSTRG.12847.2	TEA029681.1_gene;TEA025050.1_gene
MSTRG.138790.2	TEA033402.1_gene
MSTRG.146599.1	TEA007317.1_gene;TEA020858.1_gene;TEA007851.1_gene;TEA017187.1_gene;TEA001044.1_gene;TEA013649.1_gene;TEA025726.1_gene;TEA030241.1_gene;TEA026670.1_gene;TEA022426.1_gene
MSTRG.134095.1	TEA015112.1_gene;TEA027917.1_gene;TEA002467.1_gene;TEA030547.1_gene
MSTRG.8647.1	TEA008989.1_gene;TEA006939.1_gene
MSTRG.130781.1	TEA027791.1_gene;TEA012710.1_gene;TEA000373.1_gene
MSTRG.89226.1	TEA030693.1_gene;TEA010833.1_gene;TEA004790.1_gene
MSTRG.40125.1	TEA021582.1_gene;TEA021580.1_gene;TEA010338.1_gene;TEA020797.1_gene;TEA001347.1_gene;TEA018895.1_gene;TEA008907.1_gene;TEA011864.1_gene;TEA023618.1_gene;TEA030286.1_gene;TEA026037.1_gene;TEA020562.1_gene
MSTRG.42673.1	TEA033601.1_gene
MSTRG.23976.1	TEA028883.1_gene;TEA005740.1_gene;TEA016184.1_gene;TEA012687.1_gene;TEA019893.1_gene;TEA001819.1_gene;TEA018785.1_gene;TEA020403.1_gene;TEA007196.1_gene;TEA011640.1_gene;TEA011555.1_gene;TEA002477.1_gene;TEA012899.1_gene;TEA000623.1_gene;TEA000792.1_gene;TEA009255.1_gene;TEA002286.1_gene;TEA005341.1_gene;TEA016181.1_gene;TEA004652.1_gene;TEA013233.1_gene;TEA018675.1_gene;TEA005517.1_gene;TEA02974…
MSTRG.58356.1	TEA007742.1_gene
MSTRG.112654.1	TEA014228.1_gene;TEA025647.1_gene;TEA021584.1_gene;TEA023485.1_gene;TEA016154.1_gene
MSTRG.70233.1	TEA027795.1_gene;TEA009712.1_gene;TEA003479.1_gene;TEA022783.1_gene
MSTRG.92201.1	TEA031482.1_gene;TEA007402.1_gene
MSTRG.31314.1	TEA020041.1_gene;TEA021856.1_gene;TEA032943.1_gene;TEA029072.1_gene;TEA010668.1_gene
MSTRG.130642.1	TEA029843.1_gene;TEA027807.1_gene;TEA001871.1_gene;TEA017677.1_gene;TEA028680.1_gene;TEA009998.1_gene;TEA028796.1_gene;TEA018551.1_gene;TEA018091.1_gene;TEA014044.1_gene;TEA015960.1_gene;TEA003474.1_gene;TEA016023.1_gene;TEA020379.1_gene;TEA022099.1_gene;TEA012643.1_gene;TEA002543.1_gene;TEA024771.1_gene;TEA000332.1_gene;TEA018298.1_gene;TEA017562.1_gene;TEA027223.1_gene;TEA009253.1_gene;TEA01019…
MSTRG.65898.1	TEA017351.1_gene;TEA029167.1_gene;TEA028294.1_gene;TEA006899.1_gene;TEA007317.1_gene;TEA000449.1_gene;TEA025726.1_gene;TEA015117.1_gene;TEA018719.1_gene;TEA008506.1_gene;TEA015754.1_gene;TEA028595.1_gene;TEA011759.1_gene;TEA030505.1_gene;TEA007851.1_gene;TEA020949.1_gene;TEA006444.1_gene;TEA023826.1_gene;TEA015517.1_gene;TEA004625.1_gene;TEA021063.1_gene;TEA011448.1_gene;TEA020409.1_gene;TEA02701…
MSTRG.32713.1	TEA020388.1_gene
MSTRG.65114.3	TEA004210.1_gene;TEA033797.1_gene
MSTRG.153033.2	TEA011198.1_gene
MSTRG.68407.1	TEA029218.1_gene;TEA029583.1_gene;TEA002491.1_gene;TEA021522.1_gene;TEA030312.1_gene;TEA028289.1_gene;TEA019306.1_gene;TEA015626.1_gene;TEA030035.1_gene;TEA017101.1_gene;TEA021751.1_gene
MSTRG.146575.1	TEA008523.1_gene;TEA011926.1_gene;TEA003736.1_gene
MSTRG.4837.25	TEA027795.1_gene;TEA022783.1_gene
MSTRG.103820.1	TEA017353.1_gene;TEA009683.1_gene;TEA000912.1_gene;TEA010771.1_gene;TEA032607.1_gene
MSTRG.123864.1	TEA032034.1_gene
MSTRG.121525.37	TEA027795.1_gene;TEA003479.1_gene;TEA022783.1_gene;TEA009712.1_gene
MSTRG.136043.6	TEA003479.1_gene;TEA027795.1_gene
MSTRG.63960.1	TEA012848.1_gene
MSTRG.107998.1	TEA022203.1_gene;TEA004946.1_gene;TEA030961.1_gene
MSTRG.49168.1	TEA009440.1_gene;TEA025735.1_gene
MSTRG.126682.15	TEA025647.1_gene;TEA023485.1_gene;TEA016154.1_gene
MSTRG.9906.1	TEA029010.1_gene;TEA022262.1_gene;TEA018063.1_gene;TEA029461.1_gene;TEA026173.1_gene;TEA007164.1_gene;TEA002393.1_gene;TEA030624.1_gene;TEA005218.1_gene;TEA025961.1_gene;TEA016677.1_gene
MSTRG.136043.1	TEA027795.1_gene
MSTRG.154295.1	TEA008104.1_gene;TEA006200.1_gene;TEA008498.1_gene;TEA013176.1_gene
MSTRG.118606.1	TEA017792.1_gene;TEA002219.1_gene
MSTRG.2694.11	TEA027795.1_gene;TEA022783.1_gene
MSTRG.121733.1	TEA000877.1_gene;TEA023074.1_gene;TEA014219.1_gene;TEA016349.1_gene
MSTRG.118574.2	TEA029917.1_gene
MSTRG.14463.1	TEA025647.1_gene;TEA021584.1_gene;TEA023485.1_gene;TEA016154.1_gene
MSTRG.40525.1	TEA030873.1_gene;TEA032220.1_gene
MSTRG.76534.1	TEA016154.1_gene;TEA023485.1_gene;TEA025647.1_gene
MSTRG.108058.1	TEA028900.1_gene;TEA002885.1_gene;TEA029151.1_gene;TEA033678.1_gene
MSTRG.55261.1	TEA020379.1_gene;TEA011119.1_gene;TEA011857.1_gene;TEA012649.1_gene;TEA025219.1_gene;TEA011433.1_gene;TEA000752.1_gene;TEA009417.1_gene;TEA029122.1_gene;TEA014458.1_gene;TEA014149.1_gene;TEA024861.1_gene;TEA030755.1_gene;TEA023386.1_gene
MSTRG.97760.1	TEA015245.1_gene;TEA016651.1_gene
MSTRG.43956.1	TEA009712.1_gene;TEA004240.1_gene
MSTRG.21242.1	TEA016154.1_gene
MSTRG.51425.1	TEA023687.1_gene
MSTRG.150730.1	TEA027795.1_gene;TEA022783.1_gene;TEA009712.1_gene;TEA003479.1_gene
MSTRG.10110.1	TEA025342.1_gene;TEA015684.1_gene;TEA003766.1_gene;TEA021584.1_gene;TEA018270.1_gene;TEA002213.1_gene;TEA022825.1_gene;TEA021492.1_gene;TEA001748.1_gene;TEA011029.1_gene;TEA024281.1_gene;TEA017354.1_gene;TEA034037.1_gene;TEA018601.1_gene;TEA023485.1_gene;TEA003461.1_gene;TEA025647.1_gene;TEA033279.1_gene;TEA008033.1_gene;TEA008223.1_gene;TEA012995.1_gene;TEA022720.1_gene;TEA000833.1_gene;TEA02981…
MSTRG.67081.2	TEA025410.1_gene;TEA025394.1_gene
MSTRG.150730.10	TEA027795.1_gene
MSTRG.4837.6	TEA027795.1_gene
MSTRG.19516.1	TEA024707.1_gene
MSTRG.15331.1	TEA026022.1_gene;TEA028244.1_gene
MSTRG.41953.1	TEA023485.1_gene
MSTRG.56154.1	TEA018712.1_gene;TEA001538.1_gene
MSTRG.150730.2	TEA027795.1_gene
MSTRG.142271.1	TEA009712.1_gene;TEA027795.1_gene
MSTRG.97758.2	TEA028334.1_gene;TEA004833.1_gene;TEA007779.1_gene;TEA025647.1_gene;TEA021584.1_gene;TEA012995.1_gene;TEA023485.1_gene;TEA020517.1_gene;TEA016154.1_gene;TEA012504.1_gene;TEA006081.1_gene;TEA030783.1_gene
MSTRG.22430.1	TEA025921.1_gene
MSTRG.50142.1	TEA017966.1_gene;TEA004191.1_gene;TEA025647.1_gene;TEA021584.1_gene;TEA023485.1_gene;TEA016154.1_gene
MSTRG.90334.1	TEA002103.1_gene
MSTRG.63503.1	TEA014284.1_gene;TEA015967.1_gene;TEA021119.1_gene;TEA000279.1_gene;TEA003529.1_gene;TEA007460.1_gene;TEA024674.1_gene;TEA007757.1_gene;TEA003842.1_gene;TEA026034.1_gene;TEA002738.1_gene;TEA006170.1_gene;TEA016346.1_gene;TEA031834.1_gene;TEA029120.1_gene;TEA027247.1_gene;TEA023722.1_gene;TEA024645.1_gene;TEA012150.1_gene;TEA019953.1_gene;TEA028912.1_gene;TEA004207.1_gene;TEA007869.1_gene;TEA02048…
MSTRG.24027.1	TEA023485.1_gene
MSTRG.113525.1	TEA013640.1_gene
MSTRG.153111.1	TEA022932.1_gene;TEA022929.1_gene
MSTRG.92860.2	TEA018508.1_gene;TEA018220.1_gene;TEA008392.1_gene;TEA011187.1_gene;TEA023759.1_gene;TEA011828.1_gene;TEA017172.1_gene;TEA004158.1_gene
MSTRG.143784.1	TEA016237.1_gene;TEA010880.1_gene;TEA003363.1_gene
MSTRG.43958.1	TEA027795.1_gene;TEA022783.1_gene
MSTRG.29652.3	TEA019064.1_gene;TEA009275.1_gene;TEA018722.1_gene;TEA012397.1_gene;TEA015112.1_gene;TEA028766.1_gene;TEA016231.1_gene;TEA022191.1_gene;TEA027917.1_gene
MSTRG.147639.1	TEA018776.1_gene;TEA018804.1_gene;TEA018799.1_gene;TEA018796.1_gene;TEA018781.1_gene;TEA018419.1_gene;TEA018811.1_gene;TEA018801.1_gene;TEA015684.1_gene;TEA013098.1_gene;TEA027508.1_gene;TEA033496.1_gene;TEA010415.1_gene;TEA001194.1_gene;TEA025692.1_gene;TEA020611.1_gene;TEA018805.1_gene;TEA019988.1_gene;TEA021504.1_gene;TEA021492.1_gene;TEA018270.1_gene;TEA033138.1_gene;TEA024281.1_gene;TEA01639…
MSTRG.31454.2	TEA016154.1_gene
MSTRG.123527.1	TEA009950.1_gene
MSTRG.32190.1	TEA016154.1_gene;TEA025647.1_gene
MSTRG.152790.3	TEA028382.1_gene
MSTRG.121525.5	TEA027795.1_gene;TEA022783.1_gene
MSTRG.40760.3	TEA032776.1_gene
MSTRG.100456.3	TEA007543.1_gene;TEA007550.1_gene;TEA033258.1_gene;TEA009101.1_gene;TEA020652.1_gene;TEA020647.1_gene;TEA017446.1_gene;TEA016804.1_gene;TEA016911.1_gene;TEA033273.1_gene;TEA000522.1_gene;TEA025648.1_gene;TEA027523.1_gene;TEA023608.1_gene;TEA023589.1_gene
MSTRG.49370.1	TEA030580.1_gene
MSTRG.116866.1	TEA025279.1_gene;TEA015158.1_gene
MSTRG.49834.2	TEA027499.1_gene;TEA006796.1_gene;TEA032798.1_gene;TEA021647.1_gene
MSTRG.81070.1	TEA025647.1_gene;TEA007300.1_gene;TEA032924.1_gene;TEA016154.1_gene;TEA010362.1_gene
MSTRG.49314.1	TEA012542.1_gene
MSTRG.89412.1	TEA025556.1_gene;TEA007744.1_gene;TEA025647.1_gene;TEA021584.1_gene;TEA019308.1_gene;TEA023485.1_gene;TEA016154.1_gene
MSTRG.4912.7	TEA000601.1_gene;TEA017110.1_gene;TEA001417.1_gene;TEA026257.1_gene;TEA014695.1_gene
MSTRG.29504.3	TEA029730.1_gene
MSTRG.29505.1	TEA033207.1_gene;TEA013562.1_gene;TEA009004.1_gene
MSTRG.122452.1	TEA009554.1_gene;TEA005588.1_gene;TEA009778.1_gene;TEA027645.1_gene
MSTRG.31454.3	TEA016154.1_gene;TEA025647.1_gene
MSTRG.84271.1	TEA011726.1_gene;TEA001118.1_gene
MSTRG.149772.1	TEA023485.1_gene;TEA025647.1_gene;TEA021584.1_gene;TEA016154.1_gene
MSTRG.34975.1	TEA003280.1_gene;TEA010380.1_gene;TEA029557.1_gene
MSTRG.4299.2	TEA022484.1_gene;TEA014763.1_gene;TEA029689.1_gene;TEA022079.1_gene;TEA016231.1_gene;TEA022191.1_gene;TEA004216.1_gene;TEA009213.1_gene;TEA024014.1_gene;TEA025982.1_gene;TEA018775.1_gene;TEA020563.1_gene;TEA028766.1_gene;TEA019254.1_gene;TEA031458.1_gene;TEA027316.1_gene;TEA004518.1_gene;TEA015112.1_gene;TEA027917.1_gene;TEA000117.1_gene;TEA002467.1_gene;TEA004935.1_gene;TEA017033.1_gene;TEA00354…
MSTRG.99824.1	TEA000420.1_gene;TEA007602.1_gene;TEA005813.1_gene;TEA000758.1_gene;TEA006783.1_gene;TEA008217.1_gene;TEA023630.1_gene;TEA004971.1_gene;TEA025335.1_gene;TEA023673.1_gene;TEA031344.1_gene;TEA000455.1_gene;TEA001839.1_gene;TEA012575.1_gene;TEA018529.1_gene;TEA025106.1_gene;TEA028150.1_gene;TEA014999.1_gene;TEA024682.1_gene;TEA007636.1_gene;TEA026972.1_gene;TEA008194.1_gene;TEA019277.1_gene
MSTRG.121525.16	TEA027795.1_gene;TEA022783.1_gene
MSTRG.57637.1	TEA032587.1_gene;TEA033472.1_gene;TEA016184.1_gene
MSTRG.29548.2	TEA023485.1_gene;TEA025647.1_gene;TEA016154.1_gene
MSTRG.27937.1	TEA010779.1_gene;TEA015884.1_gene;TEA019359.1_gene;TEA004549.1_gene
MSTRG.15532.1	TEA023485.1_gene;TEA025647.1_gene;TEA027508.1_gene;TEA008033.1_gene;TEA001194.1_gene;TEA008878.1_gene;TEA003403.1_gene;TEA016154.1_gene;TEA004491.1_gene
MSTRG.5704.1	TEA030981.1_gene
MSTRG.41004.1	TEA016463.1_gene
MSTRG.121721.4	TEA029218.1_gene;TEA019306.1_gene;TEA021522.1_gene;TEA002491.1_gene;TEA029583.1_gene;TEA028289.1_gene;TEA015626.1_gene;TEA030035.1_gene;TEA004583.1_gene;TEA021751.1_gene;TEA030312.1_gene;TEA017101.1_gene;TEA009174.1_gene;TEA002471.1_gene
MSTRG.7886.4	TEA024242.1_gene;TEA028273.1_gene;TEA002272.1_gene;TEA020987.1_gene;TEA028213.1_gene;TEA012762.1_gene;TEA011342.1_gene;TEA005215.1_gene;TEA014720.1_gene;TEA013074.1_gene;TEA009814.1_gene;TEA014552.1_gene;TEA014528.1_gene;TEA023057.1_gene;TEA002982.1_gene;TEA013772.1_gene;TEA005222.1_gene;TEA008394.1_gene;TEA015012.1_gene;TEA023462.1_gene;TEA032754.1_gene;TEA021348.1_gene;TEA006996.1_gene;TEA01008…
MSTRG.19606.1	TEA004240.1_gene
MSTRG.123417.1	TEA016897.1_gene;TEA007205.1_gene;TEA006298.1_gene
MSTRG.7475.1	TEA017588.1_gene;TEA028604.1_gene
MSTRG.4777.2	TEA001403.1_gene
MSTRG.149964.1	TEA010263.1_gene;TEA014682.1_gene;TEA000304.1_gene;TEA018508.1_gene
MSTRG.63915.1	TEA030981.1_gene
MSTRG.93070.1	TEA018509.1_gene;TEA017443.1_gene;TEA024785.1_gene;TEA012875.1_gene;TEA013587.1_gene;TEA019393.1_gene;TEA032218.1_gene;TEA004162.1_gene;TEA022703.1_gene;TEA011616.1_gene;TEA005150.1_gene;TEA012330.1_gene;TEA025331.1_gene;TEA002726.1_gene;TEA015305.1_gene;TEA014682.1_gene
MSTRG.41898.1	TEA015148.1_gene
MSTRG.85952.1	TEA010805.1_gene;TEA010790.1_gene;TEA010822.1_gene
MSTRG.56086.2	TEA026680.1_gene;TEA032678.1_gene;TEA010977.1_gene;TEA029745.1_gene;TEA014620.1_gene;TEA013889.1_gene;TEA016922.1_gene;TEA025634.1_gene;TEA005852.1_gene;TEA033318.1_gene;TEA033493.1_gene;TEA016179.1_gene;TEA014289.1_gene;TEA015986.1_gene;TEA005130.1_gene;TEA028211.1_gene;TEA002687.1_gene;TEA029501.1_gene;TEA020074.1_gene;TEA015616.1_gene;TEA033848.1_gene;TEA021880.1_gene;TEA008223.1_gene;TEA02647…
MSTRG.38221.1	TEA033469.1_gene
MSTRG.124176.1	TEA028604.1_gene;TEA020835.1_gene;TEA018462.1_gene;TEA019784.1_gene
MSTRG.74371.3	TEA026898.1_gene
MSTRG.129140.1	TEA019969.1_gene;TEA019971.1_gene
MSTRG.37608.1	TEA033074.1_gene;TEA012669.1_gene
MSTRG.114086.1	TEA011287.1_gene;TEA014711.1_gene
MSTRG.58267.2	TEA005947.1_gene
MSTRG.62546.8	TEA012130.1_gene
MSTRG.27645.6	TEA029853.1_gene;TEA023485.1_gene;TEA025647.1_gene;TEA032375.1_gene;TEA016154.1_gene
MSTRG.125743.4	TEA028604.1_gene;TEA018220.1_gene;TEA020835.1_gene;TEA011198.1_gene;TEA019784.1_gene;TEA003157.1_gene;TEA018045.1_gene
MSTRG.125486.1	TEA029028.1_gene
MSTRG.79743.1	TEA015534.1_gene
MSTRG.84497.2	TEA008440.1_gene
MSTRG.44381.1	TEA008866.1_gene
MSTRG.142276.1	TEA014357.1_gene
MSTRG.96490.1	TEA000522.1_gene;TEA033258.1_gene;TEA016804.1_gene;TEA020647.1_gene
MSTRG.30761.1	TEA015779.1_gene;TEA026061.1_gene;TEA001844.1_gene;TEA015112.1_gene;TEA026031.1_gene;TEA027917.1_gene;TEA029689.1_gene;TEA014662.1_gene;TEA025162.1_gene;TEA012339.1_gene;TEA026521.1_gene;TEA002802.1_gene;TEA013541.1_gene;TEA009582.1_gene;TEA013136.1_gene
MSTRG.101572.7	TEA004240.1_gene
MSTRG.138505.1	TEA002082.1_gene
MSTRG.17922.1	TEA023570.1_gene;TEA020488.1_gene;TEA029693.1_gene;TEA016671.1_gene;TEA005513.1_gene
MSTRG.11139.1	TEA003103.1_gene;TEA013227.1_gene;TEA022652.1_gene
MSTRG.129480.1	TEA009106.1_gene
MSTRG.155406.1	TEA003008.1_gene
MSTRG.82358.1	TEA032906.1_gene;TEA028604.1_gene;TEA019784.1_gene
MSTRG.80955.3	TEA019258.1_gene;TEA016642.1_gene;TEA031396.1_gene
MSTRG.18399.7	TEA022783.1_gene;TEA027795.1_gene
MSTRG.120065.5	TEA016231.1_gene;TEA028737.1_gene;TEA033053.1_gene;TEA022806.1_gene;TEA029659.1_gene;TEA031837.1_gene
MSTRG.135661.2	TEA029218.1_gene;TEA002491.1_gene;TEA030312.1_gene;TEA029583.1_gene;TEA028289.1_gene;TEA030035.1_gene;TEA017101.1_gene;TEA021522.1_gene;TEA015626.1_gene;TEA019306.1_gene;TEA009174.1_gene;TEA021751.1_gene;TEA001806.1_gene;TEA022838.1_gene;TEA023771.1_gene;TEA005179.1_gene;TEA008969.1_gene;TEA025631.1_gene;TEA016956.1_gene;TEA004646.1_gene
MSTRG.109924.2	TEA001194.1_gene;TEA025692.1_gene;TEA016083.1_gene;TEA027761.1_gene;TEA030783.1_gene;TEA009813.1_gene;TEA017354.1_gene;TEA032593.1_gene;TEA009725.1_gene;TEA007599.1_gene;TEA028803.1_gene;TEA016154.1_gene;TEA018658.1_gene;TEA019519.1_gene;TEA025342.1_gene;TEA017305.1_gene;TEA004165.1_gene;TEA004833.1_gene;TEA020156.1_gene;TEA022825.1_gene;TEA028334.1_gene;TEA027508.1_gene;TEA033496.1_gene;TEA01827…
MSTRG.125273.1	TEA033579.1_gene;TEA017860.1_gene;TEA015640.1_gene
MSTRG.46358.1	TEA020901.1_gene
MSTRG.5020.1	TEA013502.1_gene;TEA009991.1_gene;TEA014620.1_gene;TEA016436.1_gene;TEA019965.1_gene;TEA011935.1_gene;TEA001128.1_gene;TEA021348.1_gene
MSTRG.46985.1	TEA033604.1_gene;TEA022555.1_gene;TEA003317.1_gene;TEA016693.1_gene;TEA016158.1_gene;TEA025048.1_gene;TEA029477.1_gene;TEA009810.1_gene
MSTRG.112071.2	TEA025647.1_gene;TEA021584.1_gene;TEA023485.1_gene;TEA012848.1_gene;TEA016154.1_gene
MSTRG.2694.6	TEA027795.1_gene
MSTRG.17353.1	TEA030360.1_gene;TEA005343.1_gene
MSTRG.22937.1	TEA018220.1_gene;TEA028604.1_gene;TEA018508.1_gene;TEA011894.1_gene;TEA025877.1_gene;TEA008392.1_gene;TEA020835.1_gene;TEA011198.1_gene;TEA032906.1_gene;TEA010263.1_gene;TEA019784.1_gene;TEA023759.1_gene;TEA018462.1_gene;TEA011828.1_gene;TEA011187.1_gene;TEA006094.1_gene;TEA031200.1_gene;TEA033370.1_gene;TEA033451.1_gene
MSTRG.16601.5	TEA030917.1_gene
MSTRG.117820.2	TEA027795.1_gene;TEA003479.1_gene;TEA009712.1_gene;TEA022783.1_gene
MSTRG.134713.4	TEA017677.1_gene;TEA030632.1_gene;TEA021767.1_gene;TEA008670.1_gene;TEA007439.1_gene;TEA002521.1_gene;TEA028680.1_gene;TEA024771.1_gene;TEA000332.1_gene;TEA009998.1_gene;TEA020379.1_gene;TEA005334.1_gene;TEA009253.1_gene;TEA022099.1_gene;TEA018551.1_gene;TEA003741.1_gene;TEA007969.1_gene;TEA030403.1_gene;TEA018741.1_gene;TEA002477.1_gene;TEA004336.1_gene;TEA024719.1_gene;TEA024718.1_gene;TEA01829…
MSTRG.17264.2	TEA027795.1_gene
MSTRG.29726.2	TEA027795.1_gene;TEA022783.1_gene
MSTRG.107910.1	TEA020563.1_gene;TEA027917.1_gene;TEA015112.1_gene;TEA003087.1_gene
MSTRG.29596.1	TEA007851.1_gene;TEA023826.1_gene;TEA025726.1_gene;TEA016455.1_gene;TEA027018.1_gene;TEA021373.1_gene
MSTRG.17266.7	TEA009712.1_gene;TEA027795.1_gene;TEA022783.1_gene
MSTRG.150724.4	TEA016154.1_gene
MSTRG.93783.2	TEA027360.1_gene;TEA006132.1_gene
MSTRG.42201.2	TEA010263.1_gene;TEA000304.1_gene;TEA025877.1_gene;TEA018508.1_gene;TEA014682.1_gene;TEA018220.1_gene;TEA008392.1_gene;TEA015961.1_gene;TEA029009.1_gene
MSTRG.118729.1	TEA028999.1_gene;TEA005177.1_gene
MSTRG.120283.28	TEA022783.1_gene;TEA027795.1_gene;TEA009712.1_gene;TEA003479.1_gene
MSTRG.48850.1	TEA012728.1_gene;TEA009454.1_gene
MSTRG.26849.1	TEA016591.1_gene
MSTRG.71000.1	TEA027592.1_gene;TEA008959.1_gene;TEA031695.1_gene;TEA010616.1_gene;TEA006112.1_gene;TEA031694.1_gene;TEA015693.1_gene;TEA025099.1_gene;TEA016990.1_gene;TEA027277.1_gene;TEA017011.1_gene;TEA005982.1_gene;TEA011392.1_gene
MSTRG.68012.2	TEA002762.1_gene;TEA000210.1_gene;TEA023374.1_gene;TEA002225.1_gene;TEA025880.1_gene;TEA007532.1_gene;TEA006815.1_gene;TEA031151.1_gene;TEA017412.1_gene;TEA015366.1_gene
MSTRG.132992.1	TEA025647.1_gene;TEA023485.1_gene;TEA016154.1_gene
MSTRG.23416.2	TEA001262.1_gene
MSTRG.87956.1	TEA011092.1_gene
MSTRG.63677.1	TEA003214.1_gene
MSTRG.93508.1	TEA010047.1_gene
MSTRG.153616.1	TEA010688.1_gene
MSTRG.122335.2	TEA016154.1_gene
MSTRG.27029.1	TEA016154.1_gene
MSTRG.94807.1	TEA031427.1_gene
MSTRG.53268.1	TEA019277.1_gene;TEA008217.1_gene;TEA006783.1_gene
MSTRG.1875.1	TEA006454.1_gene
MSTRG.53207.1	TEA016503.1_gene;TEA027949.1_gene;TEA006101.1_gene;TEA034039.1_gene
MSTRG.114778.4	TEA019677.1_gene
MSTRG.28036.1	TEA005986.1_gene;TEA027647.1_gene;TEA005977.1_gene;TEA004596.1_gene;TEA006004.1_gene
MSTRG.126055.1	TEA008641.1_gene;TEA017516.1_gene;TEA012752.1_gene;TEA032989.1_gene;TEA019551.1_gene;TEA005928.1_gene;TEA018057.1_gene;TEA020227.1_gene;TEA033279.1_gene;TEA008033.1_gene;TEA008223.1_gene;TEA004491.1_gene;TEA020611.1_gene;TEA019988.1_gene;TEA001748.1_gene;TEA019525.1_gene;TEA033138.1_gene;TEA014446.1_gene;TEA034037.1_gene;TEA034026.1_gene;TEA004212.1_gene;TEA002213.1_gene;TEA005093.1_gene;TEA02410…
MSTRG.80746.1	TEA029917.1_gene;TEA027726.1_gene;TEA013429.1_gene
MSTRG.47938.1	TEA025647.1_gene;TEA023485.1_gene;TEA016154.1_gene
MSTRG.143778.1	TEA033746.1_gene;TEA002357.1_gene;TEA025947.1_gene;TEA017380.1_gene;TEA024220.1_gene;TEA032032.1_gene;TEA015534.1_gene;TEA025296.1_gene;TEA003215.1_gene;TEA016511.1_gene
MSTRG.33028.3	TEA023054.1_gene;TEA025647.1_gene;TEA023485.1_gene
MSTRG.101572.1	TEA004240.1_gene
MSTRG.4506.1	TEA023074.1_gene;TEA000877.1_gene;TEA016349.1_gene;TEA014219.1_gene;TEA020710.1_gene;TEA029730.1_gene;TEA013271.1_gene
MSTRG.94274.1	TEA021401.1_gene;TEA007038.1_gene;TEA026030.1_gene
MSTRG.91586.1	TEA002343.1_gene;TEA007794.1_gene;TEA002958.1_gene;TEA017946.1_gene;TEA017944.1_gene;TEA022099.1_gene;TEA001718.1_gene;TEA016023.1_gene;TEA028680.1_gene;TEA009253.1_gene;TEA019213.1_gene;TEA015960.1_gene;TEA032912.1_gene;TEA024719.1_gene;TEA024718.1_gene;TEA009998.1_gene;TEA027807.1_gene;TEA001871.1_gene;TEA017562.1_gene;TEA002988.1_gene;TEA012643.1_gene;TEA029649.1_gene;TEA028796.1_gene;TEA01855…
MSTRG.108410.15	TEA029218.1_gene;TEA019306.1_gene;TEA002491.1_gene;TEA029583.1_gene;TEA028289.1_gene;TEA015626.1_gene;TEA030312.1_gene;TEA021522.1_gene;TEA004583.1_gene;TEA030035.1_gene;TEA017101.1_gene;TEA021751.1_gene;TEA009174.1_gene
MSTRG.113645.1	TEA018508.1_gene;TEA011187.1_gene;TEA023759.1_gene;TEA018220.1_gene;TEA011828.1_gene;TEA011894.1_gene;TEA008392.1_gene;TEA017172.1_gene;TEA013975.1_gene;TEA004158.1_gene
MSTRG.116761.1	TEA013014.1_gene
MSTRG.61219.1	TEA028604.1_gene;TEA032906.1_gene;TEA020835.1_gene;TEA019784.1_gene;TEA003157.1_gene;TEA011198.1_gene;TEA018462.1_gene;TEA002926.1_gene;TEA014015.1_gene;TEA018045.1_gene;TEA029885.1_gene;TEA026894.1_gene;TEA014620.1_gene;TEA020986.1_gene;TEA013549.1_gene;TEA006094.1_gene;TEA031200.1_gene;TEA001611.1_gene;TEA033370.1_gene;TEA033576.1_gene;TEA033451.1_gene;TEA009644.1_gene
MSTRG.155304.1	TEA010229.1_gene;TEA001991.1_gene;TEA026045.1_gene;TEA001935.1_gene;TEA006078.1_gene;TEA018729.1_gene;TEA026248.1_gene;TEA016991.1_gene;TEA029922.1_gene;TEA005098.1_gene;TEA013572.1_gene;TEA014711.1_gene
MSTRG.115642.1	TEA005928.1_gene;TEA021492.1_gene;TEA032532.1_gene;TEA025045.1_gene;TEA030129.1_gene;TEA020611.1_gene;TEA029589.1_gene;TEA019519.1_gene;TEA018805.1_gene;TEA003192.1_gene;TEA021504.1_gene;TEA002690.1_gene;TEA011029.1_gene;TEA033110.1_gene;TEA025313.1_gene;TEA024281.1_gene;TEA016394.1_gene;TEA009813.1_gene;TEA024608.1_gene;TEA006299.1_gene;TEA011930.1_gene;TEA031183.1_gene;TEA004212.1_gene;TEA00730…
MSTRG.42505.1	TEA008142.1_gene;TEA017296.1_gene;TEA011041.1_gene;TEA028976.1_gene;TEA013423.1_gene;TEA020134.1_gene;TEA020423.1_gene;TEA012793.1_gene;TEA029999.1_gene
MSTRG.41410.3	TEA010887.1_gene
MSTRG.120186.1	TEA025647.1_gene;TEA021584.1_gene;TEA023485.1_gene;TEA016154.1_gene
MSTRG.128670.2	TEA029310.1_gene;TEA004596.1_gene;TEA003157.1_gene
MSTRG.67402.1	TEA028604.1_gene;TEA010263.1_gene;TEA000304.1_gene;TEA014682.1_gene;TEA020835.1_gene
MSTRG.154892.1	TEA010580.1_gene;TEA027797.1_gene;TEA010597.1_gene;TEA027800.1_gene;TEA006074.1_gene;TEA010599.1_gene;TEA032397.1_gene;TEA007941.1_gene;TEA004787.1_gene;TEA004083.1_gene;TEA007945.1_gene;TEA008107.1_gene;TEA013636.1_gene;TEA007956.1_gene;TEA022579.1_gene;TEA003482.1_gene;TEA011312.1_gene;TEA003468.1_gene;TEA003077.1_gene;TEA022861.1_gene
MSTRG.49734.3	TEA019234.1_gene
MSTRG.70273.6	TEA011920.1_gene;TEA022038.1_gene
MSTRG.29235.1	TEA009004.1_gene;TEA013562.1_gene;TEA033207.1_gene
MSTRG.81489.9	TEA029391.1_gene
MSTRG.18393.1	TEA028604.1_gene;TEA032906.1_gene;TEA020835.1_gene;TEA019784.1_gene;TEA003157.1_gene;TEA002926.1_gene;TEA014015.1_gene;TEA018045.1_gene;TEA006094.1_gene;TEA031200.1_gene;TEA001611.1_gene;TEA033451.1_gene
MSTRG.43898.2	TEA004240.1_gene
MSTRG.44241.3	TEA006430.1_gene
MSTRG.95895.1	TEA029442.1_gene;TEA025647.1_gene;TEA023485.1_gene;TEA016154.1_gene
MSTRG.36344.1	TEA023485.1_gene;TEA025647.1_gene;TEA016154.1_gene
MSTRG.16264.1	TEA029724.1_gene;TEA029718.1_gene;TEA021923.1_gene;TEA027231.1_gene;TEA029571.1_gene;TEA008600.1_gene;TEA008608.1_gene;TEA008603.1_gene;TEA023200.1_gene;TEA006052.1_gene;TEA012443.1_gene;TEA014499.1_gene
MSTRG.98649.1	TEA014474.1_gene
MSTRG.102510.2	TEA011687.1_gene
MSTRG.146768.3	TEA029005.1_gene;TEA006176.1_gene;TEA020403.1_gene;TEA001915.1_gene;TEA025168.1_gene;TEA032258.1_gene;TEA006709.1_gene;TEA027387.1_gene;TEA007196.1_gene;TEA022388.1_gene;TEA018345.1_gene;TEA033655.1_gene;TEA018158.1_gene;TEA029511.1_gene;TEA009771.1_gene;TEA015631.1_gene;TEA005612.1_gene;TEA014641.1_gene;TEA003258.1_gene;TEA015749.1_gene;TEA021280.1_gene;TEA032945.1_gene;TEA000007.1_gene;TEA00275…
MSTRG.133422.1	TEA004597.1_gene
MSTRG.31609.1	TEA018508.1_gene;TEA018220.1_gene;TEA023759.1_gene;TEA011187.1_gene;TEA011828.1_gene;TEA008392.1_gene;TEA017172.1_gene;TEA013975.1_gene;TEA004158.1_gene;TEA011894.1_gene;TEA025877.1_gene;TEA010263.1_gene;TEA004463.1_gene;TEA000304.1_gene;TEA020835.1_gene
MSTRG.46701.1	TEA030573.1_gene
MSTRG.88907.2	TEA016954.1_gene
MSTRG.95965.1	TEA030625.1_gene;TEA033323.1_gene;TEA006449.1_gene;TEA006309.1_gene;TEA020139.1_gene;TEA032215.1_gene
MSTRG.46466.1	TEA007844.1_gene;TEA024416.1_gene;TEA014662.1_gene;TEA025538.1_gene;TEA025734.1_gene;TEA003418.1_gene;TEA033166.1_gene;TEA009214.1_gene;TEA031925.1_gene;TEA023057.1_gene;TEA032189.1_gene;TEA002279.1_gene;TEA018237.1_gene;TEA032496.1_gene;TEA028833.1_gene;TEA014488.1_gene;TEA013147.1_gene;TEA012810.1_gene;TEA033554.1_gene;TEA017672.1_gene;TEA014166.1_gene;TEA014056.1_gene;TEA011590.1_gene
MSTRG.20971.1	TEA003251.1_gene;TEA012693.1_gene
MSTRG.4716.1	TEA020115.1_gene;TEA020121.1_gene;TEA029155.1_gene
MSTRG.40499.1	TEA017770.1_gene;TEA029278.1_gene;TEA011002.1_gene;TEA006256.1_gene;TEA000644.1_gene;TEA011018.1_gene;TEA002126.1_gene;TEA024149.1_gene;TEA000817.1_gene
MSTRG.15331.4	TEA021339.1_gene;TEA027106.1_gene
MSTRG.110191.1	TEA023980.1_gene;TEA025384.1_gene;TEA023970.1_gene;TEA026045.1_gene;TEA000637.1_gene;TEA010229.1_gene;TEA002637.1_gene;TEA030310.1_gene
MSTRG.123345.5	TEA025648.1_gene;TEA027891.1_gene;TEA025285.1_gene
MSTRG.29446.1	TEA013698.1_gene;TEA020715.1_gene;TEA010931.1_gene
MSTRG.79101.1	TEA006257.1_gene
MSTRG.58992.1	TEA017454.1_gene;TEA003766.1_gene
MSTRG.20846.1	TEA024655.1_gene;TEA011800.1_gene
MSTRG.55524.1	TEA008683.1_gene
MSTRG.104770.1	TEA008966.1_gene
MSTRG.53250.1	TEA030766.1_gene;TEA023998.1_gene
MSTRG.110992.7	TEA020901.1_gene;TEA000948.1_gene;TEA003727.1_gene
MSTRG.52457.1	TEA032498.1_gene;TEA022250.1_gene;TEA032502.1_gene
MSTRG.84788.1	TEA003951.1_gene
MSTRG.90350.1	TEA028169.1_gene;TEA024973.1_gene;TEA007876.1_gene;TEA000751.1_gene;TEA003560.1_gene;TEA008149.1_gene;TEA016510.1_gene;TEA022865.1_gene;TEA002319.1_gene;TEA021500.1_gene;TEA017039.1_gene;TEA017932.1_gene;TEA020074.1_gene
MSTRG.99965.1	TEA011367.1_gene;TEA005731.1_gene
MSTRG.65889.1	TEA018515.1_gene;TEA000760.1_gene;TEA028086.1_gene
MSTRG.39434.1	TEA016154.1_gene;TEA025647.1_gene
MSTRG.75243.1	TEA032906.1_gene
MSTRG.145320.21	TEA004240.1_gene
MSTRG.10916.1	TEA004881.1_gene
MSTRG.35156.1	TEA011709.1_gene;TEA015099.1_gene;TEA011358.1_gene;TEA011357.1_gene;TEA024042.1_gene;TEA002926.1_gene;TEA033318.1_gene;TEA012709.1_gene;TEA033848.1_gene;TEA021713.1_gene;TEA023607.1_gene;TEA029511.1_gene;TEA006720.1_gene;TEA009705.1_gene;TEA010775.1_gene;TEA002521.1_gene;TEA002565.1_gene;TEA013916.1_gene;TEA010909.1_gene;TEA027718.1_gene;TEA013662.1_gene;TEA018282.1_gene;TEA017009.1_gene;TEA01716…
MSTRG.111497.1	TEA016154.1_gene
MSTRG.62372.1	TEA033451.1_gene;TEA018220.1_gene;TEA018508.1_gene;TEA011894.1_gene;TEA011187.1_gene;TEA008392.1_gene;TEA025877.1_gene;TEA011828.1_gene;TEA023759.1_gene;TEA020835.1_gene;TEA010263.1_gene;TEA017172.1_gene;TEA004463.1_gene
MSTRG.40122.1	TEA021580.1_gene;TEA010338.1_gene;TEA020797.1_gene;TEA021582.1_gene;TEA011864.1_gene;TEA023618.1_gene;TEA030286.1_gene;TEA026037.1_gene;TEA001347.1_gene;TEA008907.1_gene;TEA027548.1_gene;TEA004424.1_gene;TEA031723.1_gene;TEA023969.1_gene;TEA011599.1_gene;TEA016726.1_gene;TEA024070.1_gene;TEA012191.1_gene;TEA002073.1_gene;TEA020564.1_gene;TEA032401.1_gene;TEA033311.1_gene;TEA004434.1_gene;TEA02670…
MSTRG.63560.1	TEA013453.1_gene;TEA024281.1_gene;TEA033645.1_gene;TEA033110.1_gene;TEA034008.1_gene;TEA019376.1_gene;TEA027949.1_gene;TEA001683.1_gene;TEA021492.1_gene;TEA004120.1_gene;TEA018601.1_gene;TEA028228.1_gene;TEA029810.1_gene;TEA025219.1_gene;TEA032444.1_gene;TEA007779.1_gene;TEA016154.1_gene;TEA016394.1_gene;TEA025647.1_gene;TEA027761.1_gene;TEA022825.1_gene;TEA019988.1_gene;TEA029484.1_gene;TEA01664…
MSTRG.103765.1	TEA004846.1_gene
MSTRG.63974.4	TEA015444.1_gene
MSTRG.129348.2	TEA003087.1_gene;TEA020563.1_gene;TEA027917.1_gene;TEA022191.1_gene;TEA027316.1_gene;TEA027025.1_gene;TEA023592.1_gene;TEA033094.1_gene;TEA029963.1_gene;TEA021647.1_gene;TEA032327.1_gene;TEA029130.1_gene;TEA015515.1_gene;TEA030547.1_gene;TEA012740.1_gene;TEA007466.1_gene;TEA030807.1_gene
MSTRG.150177.1	TEA023098.1_gene
MSTRG.46048.16	TEA009712.1_gene;TEA004240.1_gene
MSTRG.147888.1	TEA030192.1_gene;TEA016613.1_gene;TEA020036.1_gene;TEA028284.1_gene
MSTRG.18399.11	TEA022783.1_gene;TEA027795.1_gene
MSTRG.44878.1	TEA021284.1_gene;TEA027917.1_gene
MSTRG.104053.3	TEA003699.1_gene;TEA028039.1_gene;TEA011618.1_gene;TEA002633.1_gene;TEA030027.1_gene;TEA014332.1_gene
MSTRG.17551.1	TEA033697.1_gene
MSTRG.78166.1	TEA007443.1_gene;TEA029484.1_gene;TEA008773.1_gene;TEA017516.1_gene;TEA024608.1_gene;TEA001679.1_gene;TEA003192.1_gene;TEA022890.1_gene;TEA010981.1_gene;TEA021528.1_gene
MSTRG.43971.6	TEA004240.1_gene
MSTRG.146253.5	TEA028604.1_gene;TEA011894.1_gene;TEA018220.1_gene;TEA020835.1_gene;TEA011198.1_gene;TEA018045.1_gene;TEA018462.1_gene
MSTRG.132618.1	TEA024626.1_gene;TEA024634.1_gene
MSTRG.75929.1	TEA025692.1_gene;TEA001194.1_gene;TEA006836.1_gene;TEA004165.1_gene;TEA007599.1_gene;TEA016154.1_gene;TEA027508.1_gene;TEA024281.1_gene
MSTRG.135246.1	TEA032906.1_gene;TEA028604.1_gene;TEA020835.1_gene;TEA019784.1_gene;TEA006094.1_gene;TEA031200.1_gene;TEA033370.1_gene;TEA033451.1_gene;TEA009644.1_gene
MSTRG.138199.2	TEA011894.1_gene;TEA028604.1_gene
MSTRG.91398.3	TEA016154.1_gene;TEA025647.1_gene;TEA021584.1_gene;TEA030783.1_gene;TEA023485.1_gene
MSTRG.145316.5	TEA027795.1_gene;TEA022783.1_gene
MSTRG.135987.2	TEA017561.1_gene;TEA000262.1_gene;TEA026644.1_gene;TEA018298.1_gene;TEA026674.1_gene;TEA005146.1_gene;TEA024944.1_gene;TEA019829.1_gene;TEA008488.1_gene;TEA014552.1_gene;TEA023462.1_gene;TEA009160.1_gene;TEA029744.1_gene;TEA007175.1_gene;TEA030027.1_gene;TEA014332.1_gene;TEA023712.1_gene;TEA026594.1_gene;TEA012320.1_gene;TEA002218.1_gene;TEA010741.1_gene;TEA017167.1_gene;TEA006858.1_gene;TEA01639…
MSTRG.3508.1	TEA016154.1_gene;TEA004833.1_gene;TEA025647.1_gene
MSTRG.46097.1	TEA027344.1_gene;TEA011339.1_gene;TEA025219.1_gene;TEA014081.1_gene;TEA018298.1_gene;TEA033655.1_gene;TEA033575.1_gene;TEA032260.1_gene;TEA024818.1_gene;TEA025421.1_gene;TEA013608.1_gene;TEA005868.1_gene;TEA023677.1_gene;TEA006229.1_gene;TEA019508.1_gene
MSTRG.56384.2	TEA000890.1_gene
MSTRG.149522.1	TEA025647.1_gene
MSTRG.62546.1	TEA012130.1_gene;TEA012145.1_gene;TEA006889.1_gene;TEA033593.1_gene;TEA008294.1_gene;TEA014311.1_gene;TEA019219.1_gene;TEA020265.1_gene;TEA014701.1_gene;TEA019234.1_gene;TEA001022.1_gene;TEA019409.1_gene
MSTRG.152860.1	TEA002172.1_gene;TEA017428.1_gene;TEA010541.1_gene;TEA020564.1_gene
MSTRG.109522.1	TEA000691.1_gene;TEA029637.1_gene;TEA022707.1_gene;TEA016313.1_gene
MSTRG.18399.8	TEA027795.1_gene;TEA022783.1_gene
MSTRG.17438.1	TEA030588.1_gene;TEA016224.1_gene;TEA008392.1_gene;TEA019279.1_gene;TEA013704.1_gene
MSTRG.100456.2	TEA007550.1_gene;TEA007543.1_gene;TEA033258.1_gene;TEA009101.1_gene;TEA020652.1_gene;TEA017446.1_gene;TEA020647.1_gene;TEA016804.1_gene;TEA027523.1_gene;TEA025648.1_gene;TEA033273.1_gene;TEA000522.1_gene;TEA016911.1_gene;TEA023608.1_gene;TEA023589.1_gene;TEA020884.1_gene;TEA016758.1_gene;TEA022390.1_gene
MSTRG.134713.7	TEA017677.1_gene;TEA030632.1_gene;TEA021767.1_gene;TEA013125.1_gene;TEA008670.1_gene;TEA009017.1_gene;TEA014384.1_gene;TEA027807.1_gene;TEA002988.1_gene;TEA000424.1_gene;TEA018657.1_gene;TEA005061.1_gene;TEA013558.1_gene;TEA022112.1_gene;TEA014552.1_gene;TEA020379.1_gene;TEA024872.1_gene;TEA002072.1_gene;TEA024639.1_gene;TEA027223.1_gene;TEA023524.1_gene;TEA016074.1_gene;TEA008812.1_gene;TEA03159…
MSTRG.45267.2	TEA026726.1_gene;TEA020475.1_gene;TEA021326.1_gene
MSTRG.118310.3	TEA008006.1_gene;TEA004097.1_gene;TEA025999.1_gene;TEA008184.1_gene;TEA019620.1_gene;TEA014251.1_gene;TEA005821.1_gene;TEA018104.1_gene;TEA011548.1_gene;TEA027007.1_gene;TEA027899.1_gene
MSTRG.60035.1	TEA029916.1_gene;TEA018561.1_gene
MSTRG.42265.1	TEA024571.1_gene;TEA000250.1_gene;TEA025071.1_gene;TEA020876.1_gene;TEA010551.1_gene;TEA020870.1_gene;TEA012558.1_gene;TEA012616.1_gene;TEA018043.1_gene;TEA027247.1_gene;TEA012150.1_gene;TEA023189.1_gene;TEA032034.1_gene;TEA023722.1_gene;TEA008872.1_gene;TEA015275.1_gene;TEA024795.1_gene;TEA028912.1_gene;TEA024523.1_gene;TEA018072.1_gene;TEA010595.1_gene;TEA004938.1_gene;TEA012115.1_gene;TEA02681…
MSTRG.20663.1	TEA029689.1_gene;TEA019254.1_gene;TEA016664.1_gene;TEA000117.1_gene;TEA018775.1_gene;TEA021499.1_gene;TEA032565.1_gene;TEA033800.1_gene;TEA022191.1_gene;TEA003540.1_gene;TEA002040.1_gene;TEA004216.1_gene;TEA009533.1_gene;TEA005778.1_gene;TEA031405.1_gene;TEA029058.1_gene;TEA004518.1_gene;TEA024014.1_gene;TEA027694.1_gene;TEA015371.1_gene;TEA009280.1_gene;TEA003395.1_gene;TEA002467.1_gene;TEA01696…
MSTRG.70903.2	TEA029778.1_gene
MSTRG.15196.2	TEA012172.1_gene;TEA009806.1_gene;TEA026525.1_gene;TEA016104.1_gene;TEA019689.1_gene;TEA001582.1_gene;TEA009829.1_gene;TEA011991.1_gene;TEA018091.1_gene;TEA014443.1_gene;TEA009813.1_gene;TEA025859.1_gene;TEA022115.1_gene;TEA028058.1_gene;TEA001619.1_gene
MSTRG.84230.1	TEA018270.1_gene;TEA031343.1_gene;TEA020611.1_gene;TEA028803.1_gene;TEA015684.1_gene;TEA003192.1_gene;TEA021504.1_gene;TEA016394.1_gene;TEA024608.1_gene;TEA011930.1_gene;TEA004212.1_gene;TEA025647.1_gene;TEA021465.1_gene;TEA021718.1_gene;TEA021584.1_gene;TEA008878.1_gene;TEA027508.1_gene;TEA033496.1_gene;TEA019525.1_gene;TEA024342.1_gene;TEA005093.1_gene;TEA032924.1_gene;TEA010415.1_gene;TEA00119…
MSTRG.124288.1	TEA015490.1_gene;TEA006166.1_gene;TEA018768.1_gene
MSTRG.109734.3	TEA008312.1_gene;TEA029257.1_gene;TEA000190.1_gene
MSTRG.47254.1	TEA016154.1_gene;TEA023485.1_gene;TEA025647.1_gene
MSTRG.108329.1	TEA012625.1_gene;TEA011752.1_gene;TEA023030.1_gene;TEA012671.1_gene;TEA011694.1_gene;TEA012670.1_gene;TEA011687.1_gene;TEA012394.1_gene;TEA016994.1_gene;TEA018441.1_gene;TEA018437.1_gene;TEA001613.1_gene;TEA007813.1_gene;TEA016995.1_gene;TEA005419.1_gene;TEA010502.1_gene;TEA016859.1_gene
MSTRG.147141.1	TEA006054.1_gene
MSTRG.43488.3	TEA032205.1_gene;TEA010692.1_gene;TEA000420.1_gene;TEA022731.1_gene;TEA030186.1_gene
MSTRG.58414.7	TEA033783.1_gene;TEA007478.1_gene;TEA025647.1_gene;TEA021584.1_gene;TEA016154.1_gene
MSTRG.49711.1	TEA005302.1_gene
MSTRG.30842.2	TEA033382.1_gene
MSTRG.26252.1	TEA012302.1_gene;TEA007675.1_gene;TEA012335.1_gene
MSTRG.85236.1	TEA023331.1_gene;TEA012541.1_gene;TEA008909.1_gene;TEA018557.1_gene
MSTRG.134713.1	TEA017677.1_gene;TEA030632.1_gene;TEA012195.1_gene;TEA022195.1_gene;TEA007439.1_gene;TEA016596.1_gene;TEA000332.1_gene;TEA024718.1_gene;TEA023957.1_gene;TEA010673.1_gene;TEA027223.1_gene;TEA022099.1_gene;TEA010868.1_gene;TEA023492.1_gene;TEA006428.1_gene;TEA003474.1_gene;TEA025279.1_gene;TEA017441.1_gene;TEA014653.1_gene
MSTRG.138784.2	TEA011883.1_gene
MSTRG.134813.1	TEA027795.1_gene;TEA003479.1_gene;TEA022783.1_gene;TEA009712.1_gene
MSTRG.83287.1	TEA016014.1_gene
MSTRG.145320.14	TEA004240.1_gene
MSTRG.38769.1	TEA019883.1_gene;TEA029689.1_gene;TEA032375.1_gene;TEA033520.1_gene;TEA028766.1_gene;TEA021499.1_gene;TEA003087.1_gene;TEA029130.1_gene;TEA023592.1_gene;TEA022191.1_gene;TEA027316.1_gene;TEA029058.1_gene;TEA027917.1_gene;TEA021647.1_gene;TEA030547.1_gene;TEA016501.1_gene;TEA006435.1_gene;TEA033094.1_gene
MSTRG.89123.1	TEA021584.1_gene;TEA025647.1_gene;TEA004833.1_gene;TEA023485.1_gene;TEA016154.1_gene
MSTRG.132400.1	TEA025740.1_gene;TEA020424.1_gene;TEA030277.1_gene
MSTRG.11015.3	TEA031405.1_gene;TEA027917.1_gene;TEA009533.1_gene;TEA000117.1_gene;TEA022079.1_gene;TEA023592.1_gene;TEA019254.1_gene;TEA016231.1_gene;TEA003540.1_gene;TEA031458.1_gene;TEA025982.1_gene;TEA017033.1_gene;TEA003087.1_gene;TEA022191.1_gene;TEA027316.1_gene;TEA004216.1_gene;TEA021549.1_gene;TEA004518.1_gene;TEA015112.1_gene;TEA015371.1_gene;TEA001777.1_gene;TEA016741.1_gene;TEA018729.1_gene;TEA03038…
MSTRG.55521.1	TEA008683.1_gene;TEA016154.1_gene;TEA023485.1_gene;TEA025647.1_gene
MSTRG.40810.1	TEA030706.1_gene;TEA019020.1_gene;TEA021445.1_gene;TEA016705.1_gene
MSTRG.24954.1	TEA029054.1_gene;TEA033203.1_gene;TEA018551.1_gene;TEA003192.1_gene;TEA031290.1_gene;TEA013326.1_gene;TEA002218.1_gene;TEA010741.1_gene;TEA026272.1_gene;TEA026894.1_gene;TEA005334.1_gene;TEA023712.1_gene;TEA010193.1_gene;TEA014044.1_gene;TEA007969.1_gene;TEA026013.1_gene;TEA022043.1_gene;TEA031929.1_gene;TEA002477.1_gene;TEA033318.1_gene;TEA024069.1_gene;TEA024944.1_gene;TEA029241.1_gene;TEA00076…
MSTRG.132458.1	TEA000877.1_gene;TEA023074.1_gene;TEA016349.1_gene;TEA014219.1_gene;TEA029730.1_gene
MSTRG.43972.4	TEA027795.1_gene;TEA022783.1_gene
MSTRG.152285.1	TEA001015.1_gene
MSTRG.121655.1	TEA031662.1_gene;TEA025747.1_gene
MSTRG.46041.1	TEA028604.1_gene;TEA032906.1_gene;TEA019784.1_gene
MSTRG.37085.1	TEA028699.1_gene;TEA028705.1_gene;TEA017418.1_gene
MSTRG.82049.1	TEA018837.1_gene;TEA029903.1_gene;TEA025973.1_gene;TEA026504.1_gene;TEA011913.1_gene;TEA014468.1_gene;TEA020640.1_gene;TEA014087.1_gene;TEA009533.1_gene;TEA024045.1_gene;TEA005756.1_gene;TEA018526.1_gene;TEA021845.1_gene;TEA020422.1_gene;TEA014417.1_gene;TEA015353.1_gene;TEA026160.1_gene;TEA023846.1_gene;TEA000639.1_gene;TEA018430.1_gene;TEA017404.1_gene;TEA013340.1_gene;TEA027577.1_gene;TEA00101…
MSTRG.4858.2	TEA020953.1_gene;TEA009387.1_gene;TEA001825.1_gene;TEA009767.1_gene;TEA023332.1_gene;TEA003428.1_gene;TEA014034.1_gene;TEA026240.1_gene;TEA003653.1_gene;TEA032778.1_gene;TEA020448.1_gene;TEA014438.1_gene;TEA001254.1_gene
MSTRG.55199.1	TEA027387.1_gene
MSTRG.145316.21	TEA027795.1_gene
MSTRG.145474.2	TEA018205.1_gene;TEA003871.1_gene;TEA003868.1_gene;TEA018203.1_gene;TEA026202.1_gene
MSTRG.78312.1	TEA033105.1_gene;TEA026258.1_gene
MSTRG.130813.2	TEA008566.1_gene;TEA008564.1_gene;TEA007300.1_gene;TEA020611.1_gene;TEA003192.1_gene;TEA002690.1_gene;TEA024608.1_gene;TEA023485.1_gene;TEA008033.1_gene;TEA012995.1_gene;TEA022825.1_gene;TEA027508.1_gene;TEA033496.1_gene;TEA019988.1_gene;TEA021492.1_gene;TEA018270.1_gene;TEA001748.1_gene;TEA011029.1_gene;TEA031343.1_gene;TEA033134.1_gene;TEA025313.1_gene;TEA014446.1_gene;TEA007779.1_gene;TEA02428…
MSTRG.34486.1	TEA009457.1_gene
MSTRG.120287.1	TEA003479.1_gene;TEA027795.1_gene;TEA009712.1_gene;TEA022783.1_gene
MSTRG.92525.1	TEA006417.1_gene;TEA018573.1_gene
MSTRG.66362.2	TEA013827.1_gene;TEA025647.1_gene;TEA021584.1_gene;TEA023485.1_gene;TEA016154.1_gene
MSTRG.18399.12	TEA022783.1_gene;TEA027795.1_gene
MSTRG.114195.1	TEA011218.1_gene
MSTRG.77126.1	TEA004753.1_gene;TEA014438.1_gene
MSTRG.108730.1	TEA001717.1_gene;TEA027921.1_gene;TEA031270.1_gene
MSTRG.106818.2	TEA016629.1_gene
MSTRG.145857.1	TEA028324.1_gene
MSTRG.127066.1	TEA020443.1_gene;TEA012752.1_gene;TEA018270.1_gene;TEA023485.1_gene;TEA025647.1_gene;TEA027508.1_gene;TEA015684.1_gene;TEA021504.1_gene;TEA021492.1_gene;TEA001748.1_gene;TEA031343.1_gene;TEA024281.1_gene;TEA009813.1_gene;TEA034037.1_gene;TEA017516.1_gene;TEA008033.1_gene;TEA007300.1_gene;TEA021718.1_gene;TEA006218.1_gene;TEA021584.1_gene;TEA001194.1_gene;TEA008878.1_gene;TEA012995.1_gene;TEA00777…
MSTRG.80532.1	TEA030804.1_gene;TEA027209.1_gene;TEA020639.1_gene;TEA013953.1_gene;TEA015257.1_gene
MSTRG.92660.1	TEA019375.1_gene;TEA019382.1_gene;TEA019384.1_gene;TEA029458.1_gene;TEA017910.1_gene;TEA012508.1_gene;TEA012503.1_gene;TEA012502.1_gene;TEA027537.1_gene;TEA031985.1_gene;TEA000672.1_gene;TEA028531.1_gene;TEA028396.1_gene;TEA016929.1_gene;TEA016928.1_gene;TEA010484.1_gene;TEA010774.1_gene;TEA023996.1_gene;TEA015091.1_gene
MSTRG.99504.1	TEA004076.1_gene;TEA033488.1_gene;TEA022411.1_gene;TEA018343.1_gene;TEA015098.1_gene;TEA013094.1_gene;TEA029544.1_gene;TEA027223.1_gene;TEA008003.1_gene;TEA009628.1_gene;TEA028452.1_gene;TEA031370.1_gene;TEA000133.1_gene;TEA004997.1_gene;TEA009376.1_gene;TEA026329.1_gene;TEA028081.1_gene
MSTRG.122976.1	TEA021437.1_gene
MSTRG.63960.4	TEA012848.1_gene
MSTRG.75067.1	TEA015112.1_gene;TEA027917.1_gene;TEA020563.1_gene;TEA004518.1_gene;TEA029689.1_gene;TEA022191.1_gene;TEA022079.1_gene;TEA030547.1_gene
MSTRG.123417.4	TEA016897.1_gene;TEA007205.1_gene;TEA006298.1_gene
MSTRG.98002.3	TEA015279.1_gene;TEA015266.1_gene
MSTRG.62529.2	TEA023485.1_gene;TEA025647.1_gene;TEA016154.1_gene
MSTRG.32169.2	TEA021794.1_gene;TEA022908.1_gene;TEA016697.1_gene;TEA032295.1_gene;TEA028976.1_gene;TEA024182.1_gene;TEA002565.1_gene;TEA012504.1_gene;TEA026666.1_gene;TEA020184.1_gene;TEA027949.1_gene;TEA020546.1_gene;TEA004211.1_gene;TEA015349.1_gene
MSTRG.147310.1	TEA024697.1_gene
MSTRG.38022.3	TEA005109.1_gene
MSTRG.8495.3	TEA028092.1_gene;TEA001868.1_gene;TEA001864.1_gene;TEA030366.1_gene
MSTRG.1423.1	TEA025840.1_gene
MSTRG.18399.6	TEA022783.1_gene;TEA027795.1_gene
MSTRG.43972.15	TEA027795.1_gene
MSTRG.47746.1	TEA001596.1_gene
MSTRG.44530.1	TEA032802.1_gene;TEA021586.1_gene;TEA022896.1_gene;TEA010447.1_gene
MSTRG.92205.1	TEA033451.1_gene;TEA020835.1_gene;TEA019784.1_gene;TEA003157.1_gene;TEA032906.1_gene
MSTRG.148471.1	TEA020563.1_gene;TEA015112.1_gene;TEA027917.1_gene;TEA000117.1_gene;TEA027316.1_gene;TEA022191.1_gene;TEA029689.1_gene;TEA018775.1_gene;TEA031405.1_gene;TEA026582.1_gene;TEA003540.1_gene;TEA001777.1_gene;TEA015371.1_gene;TEA027025.1_gene;TEA023592.1_gene;TEA030547.1_gene;TEA033094.1_gene;TEA021652.1_gene;TEA018546.1_gene
MSTRG.52091.1	TEA014863.1_gene;TEA018099.1_gene;TEA021308.1_gene;TEA029825.1_gene;TEA006784.1_gene
MSTRG.117758.1	TEA027795.1_gene;TEA003479.1_gene;TEA022783.1_gene
MSTRG.111493.1	TEA003353.1_gene
MSTRG.117424.2	TEA016154.1_gene
MSTRG.47747.1	TEA028582.1_gene
MSTRG.121476.1	TEA009712.1_gene;TEA004240.1_gene
MSTRG.94630.8	TEA010034.1_gene
MSTRG.126254.1	TEA017351.1_gene;TEA007317.1_gene;TEA006444.1_gene;TEA018719.1_gene;TEA025726.1_gene;TEA028294.1_gene;TEA029167.1_gene;TEA008506.1_gene;TEA000449.1_gene;TEA020949.1_gene;TEA015754.1_gene;TEA011759.1_gene;TEA003232.1_gene;TEA021088.1_gene;TEA014289.1_gene;TEA005317.1_gene;TEA019112.1_gene;TEA021063.1_gene;TEA005259.1_gene;TEA004663.1_gene
MSTRG.89392.2	TEA025520.1_gene
MSTRG.3694.1	TEA032906.1_gene;TEA028604.1_gene
MSTRG.61613.1	TEA010716.1_gene;TEA011413.1_gene;TEA009356.1_gene;TEA013578.1_gene;TEA028712.1_gene;TEA011555.1_gene;TEA010385.1_gene;TEA031697.1_gene;TEA030406.1_gene;TEA029748.1_gene;TEA005316.1_gene;TEA021754.1_gene;TEA014124.1_gene;TEA025284.1_gene;TEA031529.1_gene;TEA004121.1_gene;TEA031256.1_gene;TEA011358.1_gene;TEA002521.1_gene;TEA005493.1_gene;TEA017384.1_gene;TEA008238.1_gene;TEA027476.1_gene;TEA00840…
MSTRG.32381.2	TEA015017.1_gene;TEA023057.1_gene;TEA032800.1_gene;TEA032041.1_gene;TEA012380.1_gene;TEA027697.1_gene;TEA011126.1_gene;TEA021612.1_gene;TEA010018.1_gene;TEA004809.1_gene;TEA025412.1_gene;TEA014548.1_gene;TEA029230.1_gene;TEA016807.1_gene;TEA022388.1_gene;TEA013147.1_gene;TEA012287.1_gene;TEA006570.1_gene;TEA027573.1_gene;TEA002098.1_gene;TEA012206.1_gene;TEA014737.1_gene;TEA010074.1_gene;TEA01886…
MSTRG.74370.15	TEA029730.1_gene
MSTRG.36199.1	TEA018508.1_gene;TEA018220.1_gene;TEA011894.1_gene;TEA008392.1_gene;TEA011187.1_gene;TEA010263.1_gene;TEA011828.1_gene;TEA023759.1_gene;TEA025877.1_gene;TEA017172.1_gene;TEA013975.1_gene;TEA000304.1_gene;TEA004463.1_gene;TEA014682.1_gene;TEA004158.1_gene;TEA020835.1_gene;TEA003157.1_gene
MSTRG.7787.1	TEA012881.1_gene;TEA000761.1_gene;TEA033493.1_gene;TEA027223.1_gene;TEA002532.1_gene;TEA002477.1_gene;TEA024453.1_gene;TEA031301.1_gene;TEA018553.1_gene;TEA002192.1_gene;TEA021164.1_gene;TEA000387.1_gene;TEA019197.1_gene;TEA013456.1_gene;TEA029241.1_gene;TEA026203.1_gene;TEA011640.1_gene;TEA007046.1_gene;TEA016371.1_gene;TEA016345.1_gene;TEA027853.1_gene;TEA002230.1_gene;TEA028275.1_gene;TEA00893…
MSTRG.90453.1	TEA020271.1_gene;TEA023756.1_gene;TEA023600.1_gene;TEA028416.1_gene;TEA009300.1_gene;TEA028409.1_gene;TEA014530.1_gene;TEA005504.1_gene;TEA017551.1_gene;TEA007888.1_gene;TEA013023.1_gene;TEA033719.1_gene;TEA033091.1_gene;TEA005543.1_gene;TEA029259.1_gene;TEA000631.1_gene;TEA019567.1_gene;TEA033178.1_gene;TEA006271.1_gene;TEA030631.1_gene;TEA004464.1_gene;TEA028512.1_gene;TEA022026.1_gene;TEA02207…
MSTRG.27409.1	TEA021883.1_gene;TEA033391.1_gene;TEA008584.1_gene;TEA019076.1_gene;TEA029653.1_gene;TEA004430.1_gene;TEA012512.1_gene;TEA014090.1_gene;TEA019876.1_gene;TEA017710.1_gene;TEA020185.1_gene;TEA017481.1_gene;TEA006280.1_gene
MSTRG.3415.1	TEA018373.1_gene
MSTRG.45505.1	TEA012045.1_gene;TEA005543.1_gene;TEA013254.1_gene;TEA007888.1_gene;TEA028472.1_gene;TEA020273.1_gene;TEA019567.1_gene;TEA022119.1_gene;TEA020202.1_gene;TEA029870.1_gene;TEA018369.1_gene;TEA028409.1_gene;TEA009065.1_gene;TEA025876.1_gene;TEA013133.1_gene;TEA020900.1_gene;TEA015175.1_gene;TEA003277.1_gene;TEA025366.1_gene;TEA004464.1_gene;TEA033178.1_gene;TEA027632.1_gene;TEA017968.1_gene;TEA00928…
MSTRG.54537.1	TEA017119.1_gene;TEA029931.1_gene;TEA014747.1_gene;TEA003665.1_gene;TEA014056.1_gene
MSTRG.148179.1	TEA027948.1_gene;TEA000119.1_gene;TEA000117.1_gene;TEA005004.1_gene;TEA018897.1_gene;TEA018895.1_gene;TEA031489.1_gene;TEA023526.1_gene;TEA016454.1_gene;TEA024001.1_gene;TEA016455.1_gene;TEA031479.1_gene;TEA000116.1_gene;TEA024806.1_gene;TEA005008.1_gene;TEA008897.1_gene;TEA023542.1_gene;TEA031409.1_gene;TEA033870.1_gene;TEA031478.1_gene;TEA012201.1_gene;TEA033377.1_gene;TEA012722.1_gene
MSTRG.110848.1	TEA025647.1_gene;TEA023485.1_gene;TEA016154.1_gene
MSTRG.43972.13	TEA027795.1_gene;TEA022783.1_gene
MSTRG.72307.1	TEA027076.1_gene;TEA029477.1_gene;TEA026365.1_gene
MSTRG.12445.1	TEA007162.1_gene
MSTRG.19910.1	TEA016857.1_gene;TEA023485.1_gene;TEA025647.1_gene;TEA016154.1_gene
MSTRG.82473.11	TEA022783.1_gene;TEA027795.1_gene
MSTRG.101573.9	TEA003479.1_gene;TEA022783.1_gene;TEA027795.1_gene;TEA009712.1_gene
MSTRG.68504.2	TEA020733.1_gene;TEA020754.1_gene;TEA015712.1_gene;TEA015915.1_gene;TEA026549.1_gene;TEA016622.1_gene;TEA006402.1_gene
MSTRG.121195.2	TEA012330.1_gene;TEA011764.1_gene;TEA004162.1_gene;TEA010263.1_gene;TEA013975.1_gene;TEA005208.1_gene;TEA013587.1_gene;TEA025331.1_gene;TEA032218.1_gene;TEA017172.1_gene;TEA011616.1_gene;TEA011828.1_gene;TEA005150.1_gene;TEA011221.1_gene;TEA019393.1_gene;TEA014682.1_gene;TEA010592.1_gene;TEA007856.1_gene;TEA015305.1_gene;TEA012875.1_gene;TEA018508.1_gene;TEA004158.1_gene;TEA023759.1_gene;TEA01118…
MSTRG.88299.1	TEA013573.1_gene;TEA011975.1_gene;TEA004030.1_gene;TEA011542.1_gene;TEA019373.1_gene;TEA011606.1_gene
MSTRG.43970.1	TEA020563.1_gene;TEA015112.1_gene;TEA027917.1_gene;TEA022191.1_gene;TEA027316.1_gene;TEA004216.1_gene;TEA000117.1_gene;TEA002467.1_gene;TEA022484.1_gene;TEA028766.1_gene;TEA029689.1_gene;TEA031405.1_gene;TEA005778.1_gene;TEA001260.1_gene;TEA003087.1_gene;TEA032754.1_gene
MSTRG.137485.1	TEA002764.1_gene
MSTRG.94337.2	TEA020271.1_gene;TEA023756.1_gene;TEA023600.1_gene;TEA009300.1_gene;TEA028409.1_gene;TEA028416.1_gene;TEA000223.1_gene;TEA017551.1_gene;TEA014530.1_gene;TEA005504.1_gene;TEA005543.1_gene;TEA033719.1_gene;TEA000631.1_gene;TEA007888.1_gene;TEA019567.1_gene;TEA030631.1_gene;TEA003277.1_gene;TEA022079.1_gene;TEA002448.1_gene;TEA004464.1_gene;TEA006271.1_gene;TEA033178.1_gene;TEA029646.1_gene;TEA02851…
MSTRG.29775.1	TEA031401.1_gene;TEA023045.1_gene;TEA026227.1_gene;TEA032180.1_gene
MSTRG.82723.1	TEA017441.1_gene;TEA018741.1_gene;TEA008293.1_gene;TEA017743.1_gene;TEA002230.1_gene;TEA013608.1_gene;TEA019742.1_gene;TEA023492.1_gene;TEA012928.1_gene;TEA010868.1_gene;TEA003027.1_gene
MSTRG.34579.1	TEA009444.1_gene;TEA009473.1_gene
MSTRG.61543.2	TEA001139.1_gene;TEA022258.1_gene;TEA033689.1_gene;TEA001141.1_gene;TEA001131.1_gene;TEA029874.1_gene
MSTRG.2694.17	TEA022783.1_gene;TEA027795.1_gene
MSTRG.100709.1	TEA019813.1_gene
MSTRG.116830.22	TEA018657.1_gene
MSTRG.111272.3	TEA025647.1_gene;TEA021584.1_gene;TEA023485.1_gene;TEA016154.1_gene
MSTRG.85999.2	TEA016395.1_gene;TEA034052.1_gene;TEA028813.1_gene
MSTRG.52348.4	TEA025647.1_gene;TEA021584.1_gene;TEA023485.1_gene;TEA016154.1_gene
MSTRG.89779.22	TEA022741.1_gene;TEA007152.1_gene;TEA013403.1_gene;TEA032448.1_gene;TEA021190.1_gene;TEA022992.1_gene
MSTRG.150439.1	TEA033520.1_gene
MSTRG.15014.1	TEA024707.1_gene
MSTRG.17263.6	TEA027795.1_gene;TEA022783.1_gene
MSTRG.25405.2	TEA028975.1_gene
MSTRG.151485.1	TEA003235.1_gene;TEA018900.1_gene;TEA003234.1_gene;TEA015889.1_gene;TEA024918.1_gene;TEA026422.1_gene;TEA010408.1_gene
MSTRG.96611.1	TEA017351.1_gene;TEA029167.1_gene;TEA006899.1_gene;TEA028294.1_gene;TEA007317.1_gene;TEA011759.1_gene;TEA006444.1_gene;TEA015517.1_gene;TEA027452.1_gene;TEA021063.1_gene;TEA004625.1_gene
MSTRG.16601.4	TEA030917.1_gene
MSTRG.120284.23	TEA004240.1_gene;TEA009712.1_gene
MSTRG.38804.1	TEA028604.1_gene;TEA032906.1_gene;TEA019784.1_gene
MSTRG.82473.6	TEA022783.1_gene;TEA027795.1_gene
MSTRG.18470.1	TEA027270.1_gene;TEA023063.1_gene;TEA015415.1_gene;TEA018939.1_gene;TEA013548.1_gene;TEA029768.1_gene;TEA005253.1_gene;TEA022525.1_gene;TEA033104.1_gene;TEA021816.1_gene;TEA004776.1_gene;TEA015937.1_gene
MSTRG.77474.1	TEA031584.1_gene
MSTRG.136044.10	TEA009712.1_gene
MSTRG.134872.2	TEA010716.1_gene;TEA013578.1_gene;TEA011413.1_gene;TEA028712.1_gene;TEA009356.1_gene;TEA013577.1_gene;TEA001617.1_gene;TEA030160.1_gene;TEA011987.1_gene;TEA014124.1_gene;TEA023093.1_gene;TEA004121.1_gene;TEA022207.1_gene;TEA017180.1_gene;TEA017384.1_gene;TEA001947.1_gene;TEA006771.1_gene;TEA003032.1_gene;TEA027156.1_gene;TEA004715.1_gene;TEA017969.1_gene;TEA021779.1_gene;TEA021754.1_gene;TEA02052…
MSTRG.95279.1	TEA025647.1_gene;TEA005093.1_gene;TEA029484.1_gene;TEA016154.1_gene
MSTRG.25487.1	TEA020611.1_gene;TEA018270.1_gene;TEA025647.1_gene;TEA019525.1_gene;TEA018805.1_gene;TEA021584.1_gene;TEA023485.1_gene;TEA027949.1_gene;TEA013098.1_gene;TEA007779.1_gene;TEA016154.1_gene
MSTRG.55860.1	TEA009348.1_gene
MSTRG.52404.1	TEA023485.1_gene;TEA025647.1_gene;TEA016154.1_gene
MSTRG.3872.2	TEA005858.1_gene
MSTRG.100538.2	TEA003041.1_gene;TEA009999.1_gene
MSTRG.98446.1	TEA014482.1_gene;TEA014318.1_gene
MSTRG.107701.1	TEA015555.1_gene
MSTRG.107701.2	TEA015555.1_gene
MSTRG.28534.1	TEA032906.1_gene;TEA028604.1_gene;TEA020835.1_gene;TEA019784.1_gene;TEA018045.1_gene;TEA001611.1_gene
MSTRG.79089.4	TEA006452.1_gene
MSTRG.116952.7	TEA008138.1_gene
MSTRG.144587.1	TEA028604.1_gene
MSTRG.53679.2	TEA001774.1_gene
MSTRG.25474.1	TEA026950.1_gene
MSTRG.29518.1	TEA016151.1_gene;TEA003869.1_gene;TEA019674.1_gene
MSTRG.120065.7	TEA016231.1_gene;TEA028737.1_gene;TEA033053.1_gene;TEA022806.1_gene;TEA029659.1_gene;TEA031837.1_gene
MSTRG.66683.1	TEA025647.1_gene;TEA016154.1_gene
MSTRG.147315.1	TEA024354.1_gene;TEA006316.1_gene
MSTRG.104053.1	TEA032418.1_gene;TEA032213.1_gene;TEA029103.1_gene;TEA030027.1_gene;TEA014332.1_gene
MSTRG.24968.2	TEA027795.1_gene;TEA022783.1_gene
MSTRG.151338.4	TEA017428.1_gene;TEA023485.1_gene;TEA025647.1_gene;TEA016154.1_gene
MSTRG.147768.1	TEA016154.1_gene;TEA032352.1_gene
MSTRG.120269.1	TEA031301.1_gene;TEA005314.1_gene;TEA018824.1_gene;TEA018811.1_gene;TEA005347.1_gene;TEA015484.1_gene;TEA000760.1_gene;TEA018495.1_gene;TEA013548.1_gene;TEA029851.1_gene;TEA019481.1_gene;TEA031969.1_gene;TEA019750.1_gene;TEA024416.1_gene;TEA001470.1_gene;TEA028063.1_gene;TEA009639.1_gene;TEA033613.1_gene;TEA013333.1_gene;TEA014471.1_gene;TEA005912.1_gene;TEA011911.1_gene;TEA007429.1_gene;TEA02697…
MSTRG.1922.4	TEA004240.1_gene
MSTRG.83590.2	TEA016154.1_gene;TEA025647.1_gene
MSTRG.25330.1	TEA028979.1_gene
MSTRG.120283.3	TEA027795.1_gene;TEA022783.1_gene
MSTRG.81852.1	TEA026164.1_gene
MSTRG.8770.1	TEA002473.1_gene;TEA006734.1_gene
MSTRG.143073.1	TEA030061.1_gene
MSTRG.140089.1	TEA006801.1_gene;TEA017490.1_gene;TEA007263.1_gene
MSTRG.61227.1	TEA019234.1_gene
MSTRG.129734.2	TEA032007.1_gene
MSTRG.126360.1	TEA026389.1_gene
MSTRG.57568.1	TEA031662.1_gene;TEA029425.1_gene;TEA025747.1_gene
MSTRG.130543.1	TEA019670.1_gene
MSTRG.142699.1	TEA003479.1_gene;TEA027795.1_gene;TEA022783.1_gene;TEA009712.1_gene
MSTRG.32936.1	TEA029307.1_gene;TEA008872.1_gene;TEA002090.1_gene;TEA009155.1_gene;TEA028680.1_gene;TEA008621.1_gene;TEA026157.1_gene;TEA033066.1_gene;TEA003508.1_gene;TEA002290.1_gene
MSTRG.66886.4	TEA021251.1_gene
MSTRG.147408.1	TEA026818.1_gene;TEA002351.1_gene;TEA028048.1_gene;TEA026839.1_gene;TEA026846.1_gene;TEA028806.1_gene;TEA026835.1_gene;TEA031136.1_gene;TEA010860.1_gene;TEA010850.1_gene;TEA031133.1_gene;TEA010365.1_gene;TEA006365.1_gene;TEA011307.1_gene;TEA021511.1_gene;TEA021723.1_gene;TEA024092.1_gene;TEA008112.1_gene
MSTRG.30948.1	TEA001281.1_gene;TEA031343.1_gene;TEA013098.1_gene;TEA015684.1_gene;TEA033110.1_gene;TEA017354.1_gene;TEA004833.1_gene;TEA001194.1_gene;TEA025692.1_gene;TEA022825.1_gene;TEA029589.1_gene;TEA028334.1_gene;TEA027508.1_gene;TEA033496.1_gene;TEA001748.1_gene;TEA011029.1_gene;TEA000372.1_gene;TEA017305.1_gene;TEA031183.1_gene;TEA004518.1_gene;TEA009178.1_gene;TEA032924.1_gene;TEA010415.1_gene;TEA00822…
MSTRG.51116.1	TEA025647.1_gene;TEA016154.1_gene;TEA021584.1_gene;TEA023485.1_gene
MSTRG.68779.2	TEA025647.1_gene;TEA021584.1_gene;TEA023485.1_gene;TEA016154.1_gene
MSTRG.50212.1	TEA021586.1_gene;TEA002908.1_gene
MSTRG.153311.4	TEA008138.1_gene
MSTRG.100445.1	TEA013803.1_gene
MSTRG.2694.4	TEA003479.1_gene;TEA022783.1_gene;TEA027795.1_gene
MSTRG.69829.1	TEA001453.1_gene;TEA032755.1_gene
MSTRG.146176.2	TEA016154.1_gene;TEA025647.1_gene
MSTRG.62546.14	TEA019234.1_gene
MSTRG.41876.1	TEA017146.1_gene;TEA005464.1_gene;TEA002090.1_gene
MSTRG.25768.2	TEA031087.1_gene
MSTRG.62596.5	TEA007675.1_gene;TEA009004.1_gene;TEA012056.1_gene;TEA033207.1_gene;TEA013562.1_gene
MSTRG.12968.1	TEA032906.1_gene;TEA028604.1_gene;TEA020835.1_gene;TEA019784.1_gene
MSTRG.4542.1	TEA018729.1_gene;TEA024281.1_gene;TEA027088.1_gene
MSTRG.50686.1	TEA001724.1_gene;TEA026339.1_gene
MSTRG.85441.1	TEA021584.1_gene;TEA025647.1_gene;TEA023485.1_gene;TEA016154.1_gene
MSTRG.117962.1	TEA021710.1_gene;TEA003902.1_gene;TEA004490.1_gene;TEA017361.1_gene;TEA018955.1_gene
MSTRG.47323.1	TEA005779.1_gene;TEA005777.1_gene;TEA016267.1_gene
MSTRG.33211.1	TEA019784.1_gene;TEA003157.1_gene
MSTRG.104250.1	TEA005299.1_gene
MSTRG.106818.1	TEA016629.1_gene
MSTRG.72829.1	TEA010415.1_gene;TEA023485.1_gene;TEA025647.1_gene;TEA004833.1_gene;TEA004120.1_gene;TEA004518.1_gene
MSTRG.142929.1	TEA001800.1_gene;TEA004199.1_gene;TEA020791.1_gene;TEA002104.1_gene;TEA015885.1_gene;TEA007489.1_gene;TEA030953.1_gene;TEA003217.1_gene;TEA016231.1_gene;TEA006719.1_gene;TEA006823.1_gene;TEA019359.1_gene;TEA006575.1_gene;TEA000026.1_gene;TEA004482.1_gene;TEA009975.1_gene;TEA019560.1_gene
MSTRG.30111.5	TEA006645.1_gene;TEA001988.1_gene;TEA030395.1_gene;TEA018631.1_gene;TEA020347.1_gene;TEA006505.1_gene;TEA025647.1_gene;TEA021584.1_gene;TEA021492.1_gene;TEA023485.1_gene;TEA016154.1_gene;TEA024182.1_gene
MSTRG.43956.2	TEA004240.1_gene
MSTRG.92211.1	TEA003735.1_gene
MSTRG.68954.1	TEA000304.1_gene;TEA010263.1_gene;TEA018220.1_gene;TEA014682.1_gene;TEA011894.1_gene;TEA018508.1_gene;TEA008392.1_gene;TEA011198.1_gene;TEA028824.1_gene;TEA020835.1_gene;TEA029009.1_gene;TEA025877.1_gene;TEA015961.1_gene
MSTRG.31767.1	TEA016154.1_gene;TEA025647.1_gene
MSTRG.37277.1	TEA023017.1_gene
MSTRG.62597.1	TEA029730.1_gene
MSTRG.11657.1	TEA033618.1_gene
MSTRG.82473.20	TEA013302.1_gene;TEA028235.1_gene;TEA027795.1_gene;TEA022783.1_gene
MSTRG.135288.1	TEA010674.1_gene
MSTRG.135582.1	TEA017083.1_gene
MSTRG.78112.1	TEA004716.1_gene;TEA002749.1_gene
MSTRG.37608.2	TEA033074.1_gene;TEA012669.1_gene
MSTRG.128854.12	TEA030061.1_gene
MSTRG.4837.3	TEA027795.1_gene;TEA022783.1_gene
MSTRG.94858.1	TEA010141.1_gene;TEA025877.1_gene;TEA024539.1_gene;TEA009114.1_gene;TEA030953.1_gene
MSTRG.82718.1	TEA017266.1_gene;TEA025647.1_gene
MSTRG.128719.1	TEA027227.1_gene
MSTRG.50301.1	TEA000194.1_gene
MSTRG.150663.1	TEA014915.1_gene
MSTRG.112391.2	TEA028604.1_gene;TEA018220.1_gene;TEA018508.1_gene;TEA032906.1_gene;TEA011894.1_gene;TEA023759.1_gene;TEA025877.1_gene;TEA008392.1_gene;TEA011187.1_gene;TEA011828.1_gene;TEA017172.1_gene;TEA020835.1_gene;TEA019784.1_gene
MSTRG.61608.1	TEA025647.1_gene;TEA023485.1_gene;TEA016154.1_gene
MSTRG.25032.1	TEA014070.1_gene
MSTRG.121510.6	TEA027795.1_gene
MSTRG.85374.2	TEA012330.1_gene;TEA011616.1_gene;TEA002726.1_gene;TEA012875.1_gene;TEA004162.1_gene;TEA011764.1_gene;TEA005208.1_gene;TEA032218.1_gene;TEA024820.1_gene;TEA013587.1_gene;TEA032769.1_gene;TEA025331.1_gene;TEA019393.1_gene;TEA015305.1_gene;TEA005150.1_gene;TEA008385.1_gene;TEA010592.1_gene;TEA022703.1_gene;TEA014682.1_gene;TEA029040.1_gene;TEA010111.1_gene;TEA007856.1_gene
MSTRG.25161.1	TEA010999.1_gene;TEA019536.1_gene;TEA024281.1_gene;TEA025647.1_gene;TEA019551.1_gene;TEA021504.1_gene;TEA031343.1_gene;TEA016394.1_gene;TEA018270.1_gene;TEA024608.1_gene;TEA010415.1_gene;TEA020611.1_gene;TEA010025.1_gene;TEA004212.1_gene;TEA033496.1_gene;TEA019525.1_gene;TEA000435.1_gene;TEA025313.1_gene;TEA005093.1_gene;TEA032924.1_gene;TEA008878.1_gene;TEA018805.1_gene;TEA034026.1_gene;TEA01730…
MSTRG.14465.1	TEA002777.1_gene
MSTRG.89567.1	TEA025647.1_gene;TEA023485.1_gene;TEA016154.1_gene
MSTRG.121472.9	TEA009712.1_gene;TEA027795.1_gene;TEA022783.1_gene
MSTRG.148832.1	TEA022383.1_gene;TEA007720.1_gene;TEA015561.1_gene
MSTRG.60869.2	TEA014582.1_gene
MSTRG.109590.14	TEA030306.1_gene;TEA030304.1_gene;TEA030303.1_gene
MSTRG.111960.1	TEA007456.1_gene;TEA033113.1_gene;TEA004987.1_gene
MSTRG.52928.2	TEA003479.1_gene;TEA022783.1_gene;TEA027795.1_gene;TEA009712.1_gene
MSTRG.82473.10	TEA022783.1_gene;TEA027795.1_gene
MSTRG.24207.3	TEA021717.1_gene;TEA022679.1_gene
MSTRG.88217.1	TEA028627.1_gene;TEA006928.1_gene;TEA029098.1_gene;TEA014560.1_gene;TEA020668.1_gene
MSTRG.96243.5	TEA000781.1_gene
MSTRG.21797.3	TEA023600.1_gene;TEA020271.1_gene;TEA023756.1_gene;TEA009300.1_gene;TEA028416.1_gene;TEA005504.1_gene;TEA014530.1_gene;TEA017551.1_gene;TEA028409.1_gene;TEA033719.1_gene;TEA005543.1_gene;TEA007888.1_gene;TEA006271.1_gene;TEA030631.1_gene;TEA019567.1_gene;TEA000631.1_gene;TEA003277.1_gene;TEA028512.1_gene;TEA033178.1_gene;TEA002448.1_gene;TEA022079.1_gene;TEA021046.1_gene;TEA014995.1_gene;TEA00536…
MSTRG.59306.3	TEA020931.1_gene;TEA032123.1_gene
MSTRG.123246.2	TEA012504.1_gene;TEA023485.1_gene;TEA016154.1_gene;TEA025647.1_gene
MSTRG.41458.4	TEA008878.1_gene;TEA027508.1_gene;TEA024281.1_gene;TEA011930.1_gene;TEA012995.1_gene;TEA027949.1_gene;TEA004120.1_gene;TEA023485.1_gene;TEA025647.1_gene;TEA021584.1_gene;TEA010415.1_gene;TEA026230.1_gene;TEA034008.1_gene;TEA016154.1_gene;TEA020227.1_gene;TEA012740.1_gene;TEA029484.1_gene;TEA033645.1_gene;TEA022921.1_gene;TEA025219.1_gene;TEA022720.1_gene;TEA011833.1_gene;TEA003381.1_gene;TEA03309…
MSTRG.131845.3	TEA028604.1_gene;TEA032906.1_gene;TEA020835.1_gene;TEA019784.1_gene
MSTRG.55402.1	TEA001403.1_gene
MSTRG.101270.1	TEA005235.1_gene;TEA027958.1_gene;TEA025647.1_gene;TEA032924.1_gene;TEA021584.1_gene;TEA004833.1_gene;TEA023485.1_gene;TEA030200.1_gene;TEA016154.1_gene
MSTRG.93887.1	TEA023768.1_gene;TEA025045.1_gene
MSTRG.100445.2	TEA008111.1_gene
MSTRG.138641.1	TEA022189.1_gene;TEA027043.1_gene
MSTRG.22171.1	TEA026314.1_gene;TEA011503.1_gene;TEA026321.1_gene;TEA011509.1_gene
MSTRG.108810.2	TEA027021.1_gene
MSTRG.34770.1	TEA028811.1_gene
MSTRG.42162.1	TEA026549.1_gene;TEA030453.1_gene;TEA001024.1_gene;TEA001015.1_gene;TEA033456.1_gene;TEA016622.1_gene;TEA020494.1_gene;TEA009605.1_gene;TEA001013.1_gene;TEA003967.1_gene;TEA018358.1_gene;TEA011773.1_gene;TEA006517.1_gene;TEA017596.1_gene;TEA004938.1_gene;TEA012115.1_gene;TEA003529.1_gene;TEA006770.1_gene;TEA023189.1_gene;TEA024674.1_gene;TEA007757.1_gene;TEA030390.1_gene;TEA005301.1_gene;TEA02905…
MSTRG.120368.1	TEA031158.1_gene;TEA031151.1_gene;TEA013477.1_gene;TEA008453.1_gene;TEA013490.1_gene;TEA006943.1_gene;TEA008869.1_gene;TEA011050.1_gene;TEA010592.1_gene;TEA025187.1_gene;TEA006202.1_gene
MSTRG.121726.1	TEA029218.1_gene;TEA029583.1_gene;TEA015626.1_gene;TEA021751.1_gene
MSTRG.83310.4	TEA023485.1_gene;TEA025647.1_gene;TEA021584.1_gene;TEA016154.1_gene
MSTRG.338.2	TEA031343.1_gene;TEA019525.1_gene;TEA019988.1_gene;TEA006299.1_gene;TEA017516.1_gene;TEA008033.1_gene;TEA020836.1_gene;TEA005093.1_gene;TEA020611.1_gene;TEA018805.1_gene;TEA027508.1_gene;TEA028803.1_gene;TEA003192.1_gene;TEA021504.1_gene;TEA018270.1_gene;TEA002690.1_gene;TEA019551.1_gene;TEA025313.1_gene;TEA024281.1_gene;TEA016394.1_gene;TEA004212.1_gene;TEA025647.1_gene;TEA007300.1_gene;TEA00621…
MSTRG.135572.2	TEA006451.1_gene;TEA007030.1_gene;TEA029730.1_gene;TEA029347.1_gene;TEA013396.1_gene
MSTRG.100455.1	TEA000522.1_gene;TEA016804.1_gene;TEA020647.1_gene;TEA009101.1_gene;TEA007550.1_gene;TEA020652.1_gene;TEA016911.1_gene;TEA007543.1_gene;TEA033258.1_gene;TEA017446.1_gene;TEA025648.1_gene
MSTRG.87590.4	TEA031315.1_gene
MSTRG.66336.2	TEA000877.1_gene;TEA023074.1_gene;TEA016349.1_gene;TEA014219.1_gene
MSTRG.24678.2	TEA013162.1_gene;TEA022219.1_gene;TEA009684.1_gene;TEA005693.1_gene
MSTRG.107642.1	TEA012746.1_gene;TEA003566.1_gene
MSTRG.36615.7	TEA019845.1_gene
MSTRG.65855.1	TEA016154.1_gene
MSTRG.142155.1	TEA004877.1_gene;TEA012846.1_gene;TEA005504.1_gene;TEA008239.1_gene;TEA016329.1_gene;TEA011888.1_gene;TEA010143.1_gene;TEA013254.1_gene;TEA019549.1_gene;TEA020153.1_gene;TEA030886.1_gene;TEA003274.1_gene;TEA009289.1_gene;TEA014340.1_gene;TEA013133.1_gene;TEA018999.1_gene;TEA007888.1_gene;TEA023760.1_gene;TEA031242.1_gene;TEA023761.1_gene;TEA007969.1_gene;TEA020900.1_gene;TEA024052.1_gene;TEA01202…
MSTRG.42701.2	TEA023485.1_gene;TEA025647.1_gene;TEA016154.1_gene
MSTRG.52523.2	TEA028803.1_gene;TEA015684.1_gene;TEA018270.1_gene;TEA033134.1_gene;TEA007779.1_gene;TEA024608.1_gene;TEA011930.1_gene;TEA024342.1_gene;TEA021465.1_gene;TEA008033.1_gene;TEA021718.1_gene;TEA021584.1_gene;TEA008878.1_gene;TEA012995.1_gene;TEA022825.1_gene;TEA020611.1_gene;TEA029589.1_gene;TEA018805.1_gene;TEA027508.1_gene;TEA033496.1_gene;TEA003192.1_gene;TEA019988.1_gene;TEA021504.1_gene;TEA02149…
MSTRG.120284.33	TEA009712.1_gene
MSTRG.126352.1	TEA029730.1_gene;TEA013271.1_gene;TEA018826.1_gene
MSTRG.32785.1	TEA007318.1_gene;TEA007323.1_gene;TEA032367.1_gene;TEA026061.1_gene
MSTRG.15223.1	TEA005928.1_gene;TEA021492.1_gene;TEA017354.1_gene;TEA032532.1_gene;TEA025045.1_gene;TEA029656.1_gene;TEA030129.1_gene;TEA031343.1_gene;TEA019674.1_gene;TEA024608.1_gene;TEA020611.1_gene;TEA025647.1_gene;TEA001690.1_gene;TEA016394.1_gene;TEA023485.1_gene;TEA033279.1_gene;TEA022825.1_gene;TEA032989.1_gene;TEA018805.1_gene;TEA004601.1_gene;TEA018270.1_gene;TEA011029.1_gene;TEA025996.1_gene;TEA00980…
MSTRG.135257.1	TEA017709.1_gene
MSTRG.42521.1	TEA024003.1_gene;TEA032627.1_gene
MSTRG.69354.1	TEA007207.1_gene;TEA031031.1_gene;TEA005911.1_gene
MSTRG.10525.1	TEA024707.1_gene
MSTRG.33722.1	TEA032906.1_gene;TEA028604.1_gene
MSTRG.101573.11	TEA027795.1_gene;TEA022783.1_gene
MSTRG.150730.8	TEA027795.1_gene
MSTRG.134505.1	TEA007097.1_gene
MSTRG.93361.1	TEA021492.1_gene;TEA023485.1_gene;TEA025647.1_gene;TEA021584.1_gene;TEA016154.1_gene
MSTRG.58197.1	TEA013510.1_gene
MSTRG.36476.1	TEA032674.1_gene
[truncated: 3,419 more rows]
