# Supplementary material for: Integrated Analysis of Long Non-coding RNAs (lncRNAs) and mRNAs Reveals the Regulatory Role of lncRNAs Associated With Salt Resistance in Camellia sinensis
Source: Front Plant Sci. 2020 Mar 19;11:218. doi: 10.3389/fpls.2020.00218 (PMC7096555; doi:10.3389/fpls.2020.00218)
Supplement: TABLE S4 — LncRNA sequences identificated in this study. [file Table_4.xls]

>MSTRG.11131.1 Scaffold1214 464876-470583
GTATTTTCTCAACTTCTCTAATTCAATGGCTGACAAAGGTATATTCATTTTATTCTTGAGTTGTATTGAATTCAAAATCCTGTAGAGTTTAATTCCGCATTATTATTATGATTACATGTATTATTAAATCTTACAACTCCGCGCATGATGAAAATGACATCCTCTGGTAAACACCAACAACGACTCCAGAAATTGGAAGAAGACCACGAGGGTATACCTCACAGTCAAATTCCAATTCAGGATCCAACTGAAAATTAATATCAAGTTACTTGACCATCTCGGA
>MSTRG.24273.1 Scaffold1538 1102531-1108639
GCACCAACATATGAATAGAATAAATTAGCAAAAAATAAAGTTAGATAGCAAGGGCTTGAGCAGAGCAGCATAAAACATTTTTTACTTTTTTATTTTCTGTCTGACGTGCTTTTTCAGCATAAACTTTAGTTGTCAATACATGAGAATACCATGCAGGATTCACAATGCAGTTCCAAAATCAACTAAACACTGTTTCAATAATGAAGATCCATTTATTGCCATCATTTTTTCAAGAAAGGAAGGCAATCAGAGATCTCAAACTCACATTTTTCGTTTCTTTTCTTTGGTAAGCAAATTATAGACAAATCAAACCTACAAAAGACCAAGGATGCCTGAGAAGTGGACTTCCTTTTGTGCTCCCATTTTAAGCCAATACAATATTGAAATTTTTTACAGCCCAACAAGACATTATTTTCAGAAGGCTGACCATAATAGCAAAACCAATGCCATACATAACCACTCTAGCATTTAGTTTTGTCATAAGTAACCTATTTTATTAAATTGGATAATTTGTTATTAGAGTACTATCATTTTGTTTGTGGGTATGATAAAAGTTTGAGATATATATGTAGTGAGTAAAATCCATTTTACACCTTGTTATAGCATCAGAGCACTTCACCCCCTCACACTTATGAGCTCCATTCTATGCAGGAGCATTTTAAATTTGATTTCTATATATCAATTCTTTGCACTTGGATATATACTTTATCATCAGAATCTTGCGATTTATCTATTCACAATTTATCAACAATCAATATGAATATATGGGTGAATATGTTTTTGGGATAGAAACTATGGTGAATCGAATGATTCACAATCGATTCGCGATTTGATTCACTTTTACGATTTATGCAAGTCTTAAAACTATTGTGTCTGACAGATTCTAACCTTTTTTTATAGTGAAAATGACATAATATAACTTTGAAGAGTGTTTAATACAAAAATAAGTAATACTTGTGCATCATTTGTTGTTATTTTGGTAATCAGGGAGTTTTTCAGTAGTATTCAATTGGATCCCGTCAAACCCAACATGATCTTATACTTTTTTCTCAATTTTTTTCTCCAACAAATGTCATAATACATCTTCTAAAGATGTTTAAGGTTAAGGTAACAAACATACATGAATTATCTATTGCTAATTTAATGAAATAAATATGGTTCAATATTATATGGGTCAAGACCGTCAATGATTTCACTCTTTTTTTTTTTAATTAAAAAAAAAGAAGGCATTTTTTGAACAATAACCACACCCGTTTTAAAGTGTTTTGGTAAAAAAAAATAAACAATTTCATTTAATTCTTTCTTCATATTACACTCTATATAAGGTTTCTAGGTCCATTTTTTGAATGTCAAGACAGATTATATTATGATTGGTAAGATTTGGCATACATCTATCTCTTGATACGAAGTTAATGCCCTCCCAATTGGATGGTGTAATTATGTCTTTATATAAGAATTATTTTATAACATATGTCAAAATCAATTTATTTCATTCTTTTTCATATATACAATTGTTTAACAATCTTTTTTTTATAGTTTCTATTGAATCTTAACGATTCTCAATTCACAATACGATTCTTGATTTGACAACTATAGATATATATAT
>MSTRG.108378.1 Scaffold460 647417-652524
CCCATATCAATTCAAAAAAGCATCATTCCATAGTTGTATACATCAGCTTTATTGTTATGTCTAACCTTAATATCCACTCTAGCGCTAGATATCCAATTGTTCCTTTCATGGTTGTCAGAACCCTGCTAAATTCTCGCCAAACAAGCTTGCTAGATCAAAATCCATTACTTTTGGGTAGAGTTCCAACATCTAATAGAACGTTTGAAGGTCATGGTGTATGATACAGTCCCTGCACTCTTCA
>MSTRG.22969.4 Scaffold1508 138691-139845
ACCCTCATCCCTAACATTCTAACCCTAATTTCCCAAACACTAACCCTAATTTCCCAAACCCTAACCCACCAACCTTTTCACCATCATCTCTGGCAACCACCACTGCCACAGCCGTCGACGACCAGCAGTTCCGCCGCGAGCAAGGAGATCAGCCGCCGCCTCCTCTGCCTCTACAACAGCAGCAGGAGTTTCCAGTGATAGGGCTTTTCACGCCGCCTCGATCCCCATATTGCCGCTGCTTGTGCCGGGGAAAGAGGCGTATTATTGCGATGTAGAAGTTAAGGATAGTTGTGTCAGAGCATCTGTCTAGTATCATGAATTACGGGCTTGGGCATTATGGAACATCTTAAATTAAATCTACATATGGCATTAGTGTTCATCTTTCACCTGCAATTTGCACTATTACCAAGTCAAAGTTAATTGTCTTATCTACATTTAGCTATTGGTGTTCATCTTTCATCTTTGCTGTTGGGGGTTTTTTCCAATTGGGGTTTACAGTTGGCAATGTGGAGGTTGTATTATTGCGGTTGTTGTTTG
>MSTRG.58425.8 Scaffold245 572353-575748
ATTGCATTTCGCTTCACATACATTGCCCACAAGCAGAAATCACCTTTGTTATCAAATCCAGTCCAGTAATGTAAACCACGCAATTTCCAAATGTGCTTAGCAAGTAGACAGTGGACAGTTAGCATCATTCACCATTTTCTTGTGTTTCTGAAGTTCCCCAACTGGTGCAGTGCCAGCACCGGCCTTCCAAGCAAAAGCCTCAACTTTGTTAGGGATAATTAGGACTCCGTGTTGCCTTTCAAAAAAATTTCATGCATCCTGTGTTTGAAGTTGCTGGATACGAATTTCCAGCATTCAAGTCTGAATATTATGCAAAACGAACAGTGAACTCTGTTCTTTATGAGGTGCAAACTAATTTATTTGTCATTGGCTAGGTGAAACCAAAACATAGACAGTCGGACACGAACTGTAAAAAGAGCTCACTAATAGTCTTGCTTCCATGAACCAAAATCCTAGTCAATAAGATCAGTAAAGGAAGCATAGATATGGATACAAGATACAGATACGACACGATACGGATACAGCGATACGACAGAAC
>MSTRG.153736.1 Scaffold974 84973-91843
AATTAGTCCATCCAAGCAAGGAGATAGACACAAACCCCCATGTGGTGAGGGCTGGCACACTTTAGCTGAATTGCATCCCTTGGGTTCTCTCTCTCTCTCCCTCCCTCTTACTTGGATAATTCAAAGATGATAGTTTCATCATCCATTGAATCCTCTACTTTCTCAGGCGGAACTCAGGTGAAGAAGATTGTGAGACCAGGTTGTTCAAAAGAAGTGTTGAATGTGGCTGTGAGTTCCATTTCTCAGCAATGTCTTCTGAACCAAAACGCCGTGCCTCACTTTGAACAAGTCTGCCATGTATATATACCTGCTGTGATGAGGGAAAACATGCCTGCATCACGTATGAAGCCTATCTTCTTAGTATCTTTACTTTAATTTCTTCTTCTTTTGTATTGTGAGTTTGGGGATTTGATTTGGGGCAGGGTAGATATTTATTACTACTATATATTTACTTTTGTGAATATTTATCAGCACATATATTTACTTTTGTGAATGCCCTTATTTTTAAGTATACATGCAAATAATGCAGTTTGACCAACTATAACGGAACTCTGAATATGTCTATTTGTAAGGCTGACTGCTGGTAATATGAAATTGTAATATATGTGAAGCCTTAATGGTTGGAGTAGTGATAGTTTGAAGGGAAAATTATCATTCAAGGGGTGTTTTGAAAAAATATTACATATTGATGATAAGATTTATAATTATAATTTTAATATTTATAATCTTTACCACTTATTTGTAAATATTTTTTTTGACTACCATGTTAGTGTAATTGCCCCAAGTGTAAATCAATTCAACTCATATTCTTTTAATAATATCTATTTTACACATAGACTATTCAATTTTGAG
>MSTRG.23811.2 Scaffold1526 36398-39923
AGCCCACTGTGAGTAATTTCTTTATAAAGATATGTTCGAAAAGCATTTTGAATTGTTCAAGAATGTTATTCTGAAATCTTATTTTGTTATCTATGAAAGAAGATCCTTTTTGAACTTGTAATCGTGGCATCCTTTAGTGAGGTCCTCGCCTGGGGGAAACAATACCATGGCCCATTGGATTAATTGAAACACAAGGTCTCTGATGTTAGATCCTAGTGGTCCACATTGAATTACCCATGTGGTTTTATTGATTGACCCATTGCGATCCCATTAAATAGACCTCAATGGTCCCATTGGCTTCAGCACATTGATATATTATTACTTTATTGGATGTTACCACATATAATGATTTTCTTGTTTTTTATTTTTTGATAAATGATACCACGTATAATGATTTGCATTGGTTATTGTAGAAACAGAAGATTGATATGAATTTGATATATGACTGTTATATGAATTGTTATGGTTATTGAAAAGATATGTTCTATGAAATGTTGGACTTTATTCATTAAATCCTTTATATTGATGTTACTCACTGGGCTCCAGCTCACCTCTCTCCCTTTTATATATATGTAGGTGAGCATGTGGATCGTCAAGTTTAAGAGTTGCTTTGAGAATCCACCCCTTTGGAGAAGCCGAATGGGGAAGTGCCTCCGTGATGGGGCGATACTTGGTCTTTAGAGAGCCAAGTCTTTGTCAACCTTTTGTGTAGTCTTTTTGTTTTTGCTTTTGGAATTGTGAAACAAGTTATATGTATGAAGCTGAAGTTGAATTTTGTTGTAAATATTATTATTATGGTATGATAGTGACTTATTCTATTTATGAGGTTAGCATGTAAGCACCACTCAATGGATTCATTTATATTTTGTTATTACTTCTGCTAAGCCCCGTTATTATATTATGATTTGAATTTGTTATTGAGGCCGAAGGTAATCTGGGATTACTTCATGACCTAAACCTCTAGGAGCGGGTTCAGGTCGTGACACTTTTTGATCAAGCACCTATAACTTAGTCATTAATGCATAAATTTTGCCTTGAATACAAATTGAAATCCTTGGGGTGGCTTGTGTGGTTTGATTGATTTATTTGCTTGATTTTGGTGGAAGGTGTTTGATTGAATGCATGGTGGCTAGTTTGGTTTGATTGATTTGTTTGCTTGATTTTGGTGGAAGGTATTTGATTGAAAGCACAACTTGTAGTTGGGATGATCATAAAAGATTACAAGGGTAGGGGTGGGCGTGGATCGGTTGCGGCCACGGAACCTCCAATCCGCCATCCGTCCGCCAGATTGGCGGATTGAAGAAAATCAATCCGCATCCGTCCGCTAATCTAGCGGGTGTGGATTGAACAGATTGGCGGATTAGCGGATGGATACGAATCAGTTTGGCGGTTTAAAATTTTATAATTTTTCAACATAATTCAACTTGTACACTTTCTAAAAAAAAAAAAAAAAAGTATTATAGTCAATGACTTAAAAAAGTATTACAATCATTGGATGCCTCATCCAAAGAAA
>MSTRG.54385.1 Scaffold2323 2769761-2789978
AGTTTCTAAAAAATTCTAGCCCAAGCCCAACAAAAATTACTTTGACTGTACTAGGGCAGCAATCAGACTAGTTGTAGGAATACAGTAAAACTTCCAATAAATTAAATTTAGCATTCCATTCATTCCATCCCATCATTCACTCAATCACTAACTATTAAGGCCAACATTAATGAATTAAAATCTACTGAGATAGAGAAATGCTTCAAACAATATAGTTCTTAATCACTCACTCATATTTCATCAGTCTAAAAGCAAACAGCCTTGTGCTGCTATAATAAACTCACCATATTAATCTAAGAGATTAGAGAACCTACTCAATGCCCATTCTCCAAAACAAAGAGCACACCAAATAAGTGCTGAAGATGAACATGACAAATGGAACAAATATAAAAACATAAACATCTAAAAGAATTAGTATGCCGAGCTGCTGGCTTGTGATACGGAACAGAAATCAGAAATGTGGGATGAAAACATTTGGTAATGAAGATAACACAAGACAATGCACACAGGCTTTTGTAGAAATACAAATCTACAATGGATACAAAGCAGCTGATACGATTGATAAAGTATAAAAAATTAAAAAAATAAAGTAGCTTGAAGTTGAAAAGGTATCATCAATTTATTTGAATACTCACCAAGTGAATAATATATTCGCACTGATAGCTTCTGAATCTTTACAACACTGATCAGAGTTAGGACATGAAAATTAAACCCGAAACCAAGCTCTCATGCAATGCTCCAAAGCATCCAACATATATTTCAGTAATGAACTGTCCTACAAATCTTGAAGAAATACAGCCTTGAATATAGAATTATTAATTATATCTTGAGCCACAGTCACGACTGAGTCCTAAAACCTGCAGTTATACCGCAGATAATAGTCATGTGCATAATATCTCCACCTAAAAATTGACATCATGAAGAGGCTAAAATTAATGGTAAGCATCTTTCCACTATAAACATCTTCCAGTTTAACTAGGTTAAAAGTAAGCCCACATAGACAGTCAAAGACTCGAAAGAAAATGCACACGCACACACAAAACCATCATATATGTATGTGCACGTGTGTCGAGAGATTCAAAAAGAGAGGAAGTGCTTGGACCTCCAGTTTACCACAGACTAATAGGTTAAATTATGTAGCTTCCAATTGATCCAAACAACTTCAGGCAGTCATATATGCGCGAAAATGAAGGCATAGGTTTAAAAATCATTGCCCGGTAAACAACAACAAATGTGGCATCATATGGATCCACCATCGTCCTAAAACCACAACCCACCATGTTCAAAATCACTCCGCACATCAGTATACATATATATAGTAAACATTAACATCACATATAACTTGTTAATAAAACAAAAATTTCAGACTCAAAAGTCAATTTAAAAGATAAATAAATAACAGATACCAAGATGGATCCTTCATCCTGATCCATTTGGAGTTTTTAATACCAAGCTTTTTGCTAAATTAATATGAAGTTTGCATAGTGATGAAAATTGAACTTTCCTGGCATACCAAAGTCAGTGAATTTTTCAAGCCCTAAAACCTCAAATTCGAACAAAACCAATATCAAGTCCTGAAGTAAGCGAATCGGCCTCCTACCTATTCAACCAATCCCCCCAACAAAACCAAACCCTAACCCTAACCGATATGAACAAATCAAATCCATCCCAACCCATTTAGATATGTAAACATGTAGATCAACATCAACAGCAATTAAATCAATAAGATATCGCGCAAAAAGATAATAATTATCAAAAAAATTAATAAAACCCTTTACGTAAAGGCGCTGAATTACAGTGATTTTTCTGAAGAATTTGAGTTTGATCACGCTTTATCTCTACGATATTGATTGATGAATTCACTGAAATTATACAATCGGGGTTGAATAAAATAATGTATCTTTCGAAATTTCGATGAAGATGGACCGAAGAAATTGGGGAAAATATATAAGTAGTATATTTTATTCTCGAAA
>MSTRG.120027.5 Scaffold560 1437503-1438082
TGCATTTAATCTGTGGAGGGGAAAGGGTCCGAGGGAGGTAATTTCTACTAATAATGGTGTCCCAATAAATTCTTGAAAAATAGTATGTGACAAACGTTCATTTCTAGTTTTCTTGAAGGAATGAGATTCAAATTTTGTAAACTAACTACAATTTTTATTTTCTATTTTTTATTTTTTTGGGGCTAACACTCAAAATGTAGTTGTATTCGTGATTTATTCATAAAGAAACTACACACATGGAACGTTCGTAAAAACAATACTGTTACAGAATGATTCATCCTCATACACCCACGGAACAATTGCTTCACACTTGCTCCTACACCCGCATAGGCCTTTTGCAAAGTTTTGACTCTTTAAAGCTTTATATGGTTTTGAAGGTCTTTGGATTCAACAGCTAATATTGATGCGTTTGATTTGATGAGGTGAGTATTGTGTTTATCTCTGTAGAATTTGGTTATTAAGTTAGTTTGATGAATATTGTGAATATTGTGTG
>MSTRG.33994.1 Scaffold1775 999199-1000055
GACAACTTGCTTTGATGATGGGACAAAGGATGGATTCACAACATCTATCCTAACAATTTTTTCTAATAAAGTGAAATGTCCACCTTTATGAGTTTGGTTTTGTCATGAAAAACAGAAACCAATGCTAGCATAATAGTTGATTTATAGTCACATTATAAATAAGATGAGACATCTTCCTCAAAATTGAATTTGATACAAATAATTGTTTTTCTTTAATTTTTTTAAAGATTGGTATGTCTAAGAGTTTCTAATTTAATTGGGTGCGAGTTTCTTATTTAAGAGTGTTAGCAAAAAAAAAAAAATATCACTATGTATGATTTGATTTGAATGGAATAAAATTGATTTTTTTTTTTTTCATTTTTTACTCAAATCCTAGAAGGTACAAATTAAAAGAAGGAATCGAATCAAAAGAGGTGGGGTGCAGAATATTGATGGGGATGTGTTCCCAATCCAATATACCAACTTTGTTCTTTGTTCAAAAAAATTTAAATAAATAAATAAAAAATTTGCATATGTTGTGTTGTGTTGCTTTTGAGGAGAGAATAAAGCTGCATTATCAGAAACACTAACCCCACGCCTTTTACTTTTCACTACGCACACACATGTAGCTTTCTCTCTCTGTATCTCTATTCTTTCTTTGTACATTCTTTGTTTTTTTTAATATATATATATATATTTTTCAATGCATAGCATTTTTTATAAATATATCTATGCATAGCATATGTATGCCTCTATATGTATATCATAAAAGTAATAAATAAAGATGATTTTTTTTTAGCCAAATGCAACAAAAGAGTAATCTT
>MSTRG.83503.1 Scaffold3400 1315-2655
AAAGTGTTAATTTATTGCCAGGGCAAAGGAAGGGATTAATGCTAAAACTTTATCTATAACTATCTTAAGGTTTAAGAATTTGTCTTGTGGTATTTGAAGAACAAAAGACGTAAGAAGGCAACAAGGCAGGAGGCCGCAGTAAGCCCTTCAAAAAGGTGAGTTCCATGATACCTAAGAAAATTATTAAAGACCTTGGTAGTTTTATTAGATAAGACTTCTGTATTTTCCTTCTCAGACCAGTAATAAACGAACACCCAGACTAATATGTATAATCTTATCCTAATCAATAACAAATTATGACAAATATTTGGGAACAGAATATAAAGGAATGGTATGAAAAATCTGATACATCACGCCTAAGCTATCTTGATTTAGCCCATATTGAAAAGCCCAGTACTAAAGAACTAGCTCATAAT
>MSTRG.50960.1 Scaffold2233 394655-408150
AAAAAAATGAAATGATAAAAAAAACAAGCTTGCATGCAATGTAGATAGAGCGTCAAATGGCAGACTGCTGCAAAAAAGCAGGTACTGCTCACAGGTTTTGGCTTTGTTCGATTCGATCAGAGCTCTCTGAAATCTCTCTATCTATTGGCTAAGTCTGCAACAATCGAGCTAAAGGTAAAATCCGTACATGCTCTCTCAGAACAATCGCCAGAAGCTCCTCTGGGAGGTTTCATGGTTTGAATGCGATCATTGGGCTCTTCTTCAT
>MSTRG.28036.2 Scaffold1631 219052-226102
TGTCCCAGACATGTTGTTCTCAAACAGTAGGTATGGTATCAAGAATGGGAAAGATTTCGGAGAAGGTAGGACATTCAAAAAAGACATGAAAACCGGGACATAACAAACCACCCAAAGAGGTAATTCTGCCTCGGGTATGAACATTGCTAATGGAAGTATGACGCAAAATAGTGTGAATGAGTAAAAAGGAAGTATCAGTTTTCACAGAAGAAAGAAGAGAAATATCATGTTGGCC
>MSTRG.138112.16 Scaffold7475 323801-325137
CTATGTGCTTATGGATCTTATCTTGGCAACACGTTTCACTTTTTTTTTCCAGGTTTTTTTGTTTTTGTAAATTGATACGGTTTATTTTCCTAAAGCTTCTGACACACAAATGTTATGTGAACAATGTGAGTTAACTTATTTGTGACCAAATAACACATTTACAAGTGGAGGTTCACTTGTGAAATTATGATTCAATCAGGAATTTATCAAATGGTTTCATGACAGAAGAGAGCTCTCCTGATGCTGCATCAGAGGAGTTGGTATGATTTGTTCTACTAGAGTTCATTTATTTATTATTTATGATTTTTGATGCTATTGTAGAAATATATAAAATTGATACTGATATGGATTCTTATTAATTTACAGGGTAATGAGTACTTTAAATCGAAGTTTGAATAAGCAATTGATAGCTATTCTAGGAGCGTTGCATTATGACCAATTGTAGTAGCCTGTGCAAATAAGGGAATGGCTTATCTGAAAATAAGAAGGAAAGTTATGTTCTTTGTGGAGACAAATGAGAGAAGCTCTACTAGGAATGATTTTATTTCCACATTGACACATGTAGGGACAAATGAGAGACAGGAAAGTTATGTTCTTTGTGGAGACAAATGAGAGAAGCTCTACTACGAAGGATTTTATTTCCACATTGACACATGTAGGGACAAATGAGAGAAGCTCTACTAGGAAGGACTTCATTTTCACATATGTCAACACAAAAGGACTGTTACTCTACAACTGAAGAACTGGTGGCTTGATGTCTTTCCCAAGGCCATCTCAATATTCATTTTACATCAATGTTCCAAGTTTTTATTTTTTTATTTTAATTTTTTTAAGATGTGTAACTCATAAATTT
>MSTRG.65172.1 Scaffold2699 372592-372939
GAAAAAACTAACTTAGAGGTTGGCTGGACTAAACCAACACCCTTCTTAAGCCCAGGATAAGGATCCAGGCTGCAGGACGTTTGGTCGGAACAACCAAACATTTTATTCTAAGTTAGCTGGAAAAACTAACTTAGAGGTTGGCTGGACTAAACCAACACCCTTCCTAAGCCCAGGATAAGGATCCAGGCTGCAGGACGTTTGGTCGGAATAACCAAACATTTTATTCTAAG
>MSTRG.50312.2 Scaffold2205 1282385-1288232
AGACATACAAAAACTGAATATGGAGAGTATCTCATTATTTTGGGAATTTATTGACATAAATTGAGTGTTGTAATCGAGAGTATCTCACAAATTGTTGGGAAGTTGAATATCAAGTGGCAAAGATGGGAAATTGAATATGGATTCTAATATCATCTTTTTTATCGAGTTGAAATTTGCAAGAATATATCATGCTTCAGTTCAGTTCTGAAATCCACTAAAATGCATTGTGTTTGCTTAGTAGGCTCACATTAGACAGCTTGAGGACTTCCAAATATTGTGATTCCTTTAATTTTGCTTCTCAAGCAGATACTCAGGTTAAGACACCATTGACCTTCAACCGCTAATTGTGGACAACATTACTATTTTTGGTCACATGGATGGAGATCTACGTCGAACTGTAATACTGATTCCTTTTACTCATTTTCTTACATGTATAATTTTTTTATTTTTTTTACCTCTAATTCTTTTGTATTTTTAGGTCCAATTTCTTCAAGAAAGAAATGTTAATGTTGTTATCCGTGATGAGCGTGACCTTAATGTCATCCGTGTTCGAGAGGTAGGCCCAATTTAATTATATAGATTTTTTT
>MSTRG.77347.1 Scaffold3135 101706-102590
ATAAATATTGACATCTTCATCTTAACTCATTCTACAATTTACAACAATAAATAAATTTGTACAATCCCATTTAGAATAAGATAAATAAAGGATACCCATTAGACAAAAATATTCCTAGCTGGGCCAGCTATGTCAGTGAGAGCTCAATTTGAAGTCTAGATGTTAGTCATAAGTTCATCCTACATGGACCAGGTTAAATGTTATTTTTTACCTATCTCGCATTAAAATATCAAAATGATGGCCAAAATTTTTACGGAAATAATAC
>MSTRG.77223.1 Scaffold313 1111417-1112829
TAATTCCGTTATTTTTGCTAAAATTTTTGAATTATTAAAGACTCCTACGTTAAGTACTACTCTTCTAAGTTTATGTTTGTACATATTGTTTCCTGGATTTGGAACTTGTGGGACCTATTTTGAATTCTATTATGATAATTTAAATTGTTTAATTTTTAAGAAACATGAATAAAATATTTTTATAAAAAATTAAATTGATCAAATATCGATTTGATACTTAATTTGTAGAGAATTGAATGCCTTGTTTGGATCCTTAAAAATTGTCATCAATAACCAGCCGCCTATGGAAGCTCCACTTGACCAATAAAAAGTAAATAAGGATTTAGCAATTTTTAAATAATAACGCTATACGTACTAAGTAATATGCTAACTAGCGTACCAATTGATGATGTGACATAATTTAAGAGGTTTTAAAATTTATAATGTGAATAATAAATGAGGTCAATAATAATGTTATTATTAATGTTAATACACTAGTTAGTATACTAATAAGTGCATGCAACACCACCGATTTTGAAATATCATGTACTATTGTATACTTAATGCTCTTAATTAACGAATACCGCAAGAAAAAAATTTACAGGTAAAATGATAGTGATTCGTCTTTATTTAGCTAAGATGACTCCCCTAATGTATTTTGCAATTCTTCACCACGTAGTTATATATATATATATATATTCCCTTAATCAATGGGCTATAGTTTTATCAGTTAACTGCCAGCTCTCTTTTTTAGCCCATATGAAACAAACTGCCTTCTTTATATATATATATATATATATATAATTAATTATAATAAATAAATAAATAAATAAACAAAAGGCATGAACCATGGCATGGCACTAAACATGGCAATGGATTGATTCACAAAGCCATGAACGATTTTAGACAAGAAATTCACAGCTCCATCAGAGTCAGATTCATGGAGAAAAACAACACCAGCAGCACAATTCCCAACAGATATATCAACATAATTAGAGCATTAAAATTAGAGAAAAGAACTCGATTGTTGAAAAGCCGAGGCAGCCTGGCATTTGCCATTCTTGTGCCAAAAGAAATCCATGGTGATCCATCTACTCACCAAGAATGGTTTTGGGCTCAGCAGTACAAATACAACTTCCTCGAGCGAAAGAAATTTAGACACTGACATAATAATGCCTGTATTATCGCTCGTCTGCTACAATCTCGCTGTACACCAATCACTACCCGCCTGAAGGATTGTAATGACATTTTTGCGACTTTTTTTTCTTCTCTGGCCCTACCTGTACTGCATCCTTCAAGCAAACTGGTTTTTCTGTAGTATTCATAAATCCTCACATGTAATGAATATTCAAGTGAACCCTAAAGCAACTATAAAATACTAGAAATGTCAAAGTCA
>MSTRG.138237.1 Scaffold749 2180501-2182554
CTCAAAAGAAGGCCACTTTCAGTCAGGGCCGGAGCTCAAAACAACAAGCATATATGGCTTAAAAATGACACAAGAAATGGACCAAAAAGGGGGAAATGAAACTCACCCTTGGAGACAAGTCTTTGGTTGCTTCTTGGCTTGAGAAGTGATGCCTCCTAGCTGCTGGAAAGCCCCTCAAGCTGCTGGAAATGGAGTAGTGGTGGTGGTGCTTGGTGGTGGTGAAGAAATGAGGTAGAACTTAGGAGTTTTCAAGGAAAATGAGAGAGATGGATGGAGATATGTATGTATATGCTTGAAGCAATTTTTCTC
>MSTRG.26549.1 Scaffold1599 1448560-1462568
AAAGATGAACATCAAGATTTTTATAGTGGTTTGGTGACTTGCCTATATCAACTCCTGACATCCCTACCAGCATTAATCCACTTTAATCAAACCGATTTTCACTAGGGTAACCCAAAACCTTTACAATCACTCCTTCAAGGATTTTAACTAGGTACCTCTTCCACAATCATATAATGGGTTTAGGCTCACTCAAAATCACAAACTTAAAATGCTTTGCTAGACTTACAAAATCTGGAAAATGGATTTCAGGAAGGGGGCCTGATAACCTTAACCCTTAAGCCCAAAATGACTCCACGTAAGACTAGTGTGGTGTGAGATGAACAATAGTGTAAAGTCTATACTTAAGGGACAAGGATTATACCTTTCACAAGTGGATATCTTGAAAGATTCCCTAGGGGTAGGCTCTTGAAAGCACTTACTTTATGAATGAAAGCTACACACTCTTTTATATGTTAGATTTACACTCAAAATGCGTATGTTGGTGTATAAGTGATGTATAAGGGTCTCTAGGTGCCTTCCTCTCATCAAAAGACCCCAAATGGGAGTGTTCGGGTATTTATGTCAAGACTTCAGCGGCTATTTTTTTCTAAAAATTTCCAAGGTATGGTCGACCATACTGACTCATAGTAGTTGTTCACATCCATCCAGATGGTCAACCAAATTATGATCACTGTAGTCTACCACATTTATGAGCATAGGGGACCATACGGTGAGACAGACTAATCCTACGCTGTGGTCCTCTCTATGGTCATCCATGCTACACAACATGGTCAAACAAGCTGAGAAACTTAGGTTTTATGGTCGTTGTTTGTTTGTAGTAACTTGGTTCTATCCTAATTCAAAACCGTCTTCATGCTGATGAAGCTCTTCCACAACATTTAATGCATGCCGAAGAAAATCTCCCATCACTTCAAGCTTCTAAGGTGTTGTAGGTAGTCATATGTGCTCCCTTCATAGTAGTGACTTCAGTTCTATAAGAGAGACCTATTTTGATTTGTGTGACATCTCTAACAAATAATGTAGATATCGAAACTAACCATTTTATGGTGCTGGGCAAAATTAGCATCCCCACAATTTCAAGTTTATAGTAGTTTTTCTTTTTACACAAGATGAGCATTTAAAGTATGATAGCAGGGCTTTCTTTGCATCAAGGGGATTATGTGAACTTCCAATGTACTTGGCAAATACCTAACTTGTTTAATCACCTTATGAATGATCTCATAATTGATTCATTCACTGATTGCTAATTTGCATTTACACTGTTCGATTGATAAGATTTTGTGAGAGAATAAATGAAAAATGAGAGCTTGGGTTGGGGTCGCTCTTGTAGAAATTCCAGGTTTTGTGCTCTTACGAAATCTTAGCAATCAAACACAGCATTAAGGTAAACTTCGTTTTATGTTTATGTATTAAAATAAAAAACAATTCCTTGGTGGGAATCACTAACTTGTGATCAAGATGTGCCATAACTTCAACCCCTGGAAAAGCTGCATTCGTAGTCTCACAGGCAAGTTTGATTGCTTCTCTCCAAGTTCCACCAACACCCTCCACATTTGTCTGTTTAGATTGACCCAGATCTTCCATTGGCAATGAATACCCAGAAAGCAGATGGCCCACCCAAACACCACCTTTC
>MSTRG.151036.1 Scaffold93 379632-380013
TGTCGTGTAAACTCTCTCTCTCTCTCTCTCTCTCCCTCCCTCCCTCCCTCCCCCTTGTGGTTGTGATTTGGGCTTCTTCACTTGATTGTTATAAATTCCAACCCAAACCCACAAGAGAAAACCTCTCATGCAAAGTATTTTGAGCTAATAATGGAGCTGATAATAGTCATCACCACACTATGCATTTGTCTCTCGGTTTTGCTGACACCCTGTGCCTCTCAACAAATTCAAGTGCAATCATCCCATGACCAAGCTAAAGATGTCAAGTTTTCTCTTCTTACACTGCCAAGGAAGCTCAGAGTCATTGAGGAGGCAGC
>MSTRG.55405.1 Scaffold236 689683-690072
GGTTGTCTACACTCGGGACGTTAGAAGAGGCGTGTAAACCCACCCCACCAGTTTTTCTACCAAATCTTTGTATCTGCTCTCAGCGCTGTCTCAACCCAGGCGTAAAAAGCTCTCCGATCTCTCTCTAGAGCTTCATCGCCATGTCTCAGGTTTCAACGTATGCGAACGGTGCGATCAAATTTATATATGCTTATATTTGTATATGCGCGAG
>MSTRG.74122.1 Scaffold30 3717036-3717274
GTCTGCATTAAAGGTTTAACAATATAATTGACAGAAAAAAATATAAATGAGAGGCTAACCACATATAAAATGAAAAAGAGAGAGGCCAACCACATATCTAAGAAGAAAAAGAGAGAGACCAACTATCCATTTTATAAGGTTTCAACCACGAGGTTTGAATTCCTATCTGCCAAGTACAGATTGCACACCTTATATTGAACTAGGAC
>MSTRG.55335.1 Scaffold2358 1407123-1407510
CATACATGCCACAAGCCCAAGAGGTGGGTTAGAAACCCAATTAAGAGGGAGGATGTTCAGAAGATGGTGATGAGCCACCCAATGGGTTGTTCCCAATTCTTTTGCGTAACGCGATTCGATTGAAATCGCTTCGAAAAACACAGGTGTTGGATTGAAGAGAAGATGTGATTGCAAGCTAAGCTTTTTCAGTCCCTATCAGAAGTGTTTGTGAGTGAAAGAGATGAGTTGTTTTGGAGCATTCAGTTCTTGCAAAGAGAAATCTGAGACTCAAACAG
>MSTRG.1729.6 Scaffold104 1071121-1071800
ATTTTATTCACCATCTTGAATTAGTTAAAAGACATCTAGACTTAGTTGTGGTCTAAACTGGATACAACCTGTCCGTATTTACTTGAGCATCATATTGAATTCATTAAGCATGTTGTTTGCAGTTATTTAAACCAGTTTGAGCTGGGAATGTCGTGTTAGTTAATAGTTACATTGATGAGAGTTTGGGAGTTTGAATTGGGCACTTAATAGTTAAAGTTGCCAATTATTTGCAGGTTAATACAAATGCTCGTGAGTCGATGCAGAAAATTATTTTGGCATCTGTTAGAAAAAAATGGAGAGAGTGGAAGTGTTGAGTTAAAAAAATAGGGTATAAGCCATTCAACAATGATACTGATAGGTTAACTTATCGACCCGAAGGTGTACATGACATCAGTGGTGGAACTTGGTCTATTATTGGGGCACTCGGAAGGCACAGCTTTTGATCTGTTCTAGTGGAGGATCCTGCAACCAGTTTGCTCTGTTTCTTGCTCAGTTA
>MSTRG.153714.1 Scaffold9739 58413-67817
AAGAGGAGTTCAAGATTTTGTCAAGGATTCATCGATTGAAGATTTTAGCAAGGAAATTCAAATCAGTAGTGGTTGACTGCCATCACTAGTGGCCGACCGGCCACCATTTGTAGCCGACCAGCCTCCTATCAGCCACCAATGAAATTTGCACAGTGTGTTGGTAAATTAGAGCAGAGGTGTTCTGGAAGTGGGTAGCTTTGTTGGTGTCCATATGTGCAAACAGAGACATTTAGCAGCAAGGCAGTGACTTTTTCGGGTTAAAGAATAGAGCACGCATGCATCCTTCGCTTCCTGAGATTAGCTAATTAGCTTAATTAGCATTAGATCAAGTACATGTTATAATTAATTAGTTGTAGCTAATTAAAGTGTTATAATTAATTAGTTAGTTTAACTAGTTAATTAGTTTCGGTTTGTAATAATTAGTTAACTTAATCAGCGTAGCTAGTTAGCTTATTCATTTGAACCCTCCTTCGCGAGGGCGTAATGTTGTAATAAGTGTGCGTGCGTGTGTGTATGTCTTCCAACCCACGTCTTTCTCCCTTTTATTTAATCGCTTTTGATGGTTAGATTACGAACATGTTTCAAATTAGCATATCGCATGCTTGCATCCATTCATTTGTATTGCATGCATCGAGGCTCAG
>MSTRG.99992.1 Scaffold4138 2640879-2647614
GTCCAAGAGTCTATGAATTTAACTAAAGACACAGTGCCACATAAGGCAATACATTGTATTTAATACCACACAGAAAAGCACAGTAACTAAATATTGCTATGTTACAGGCAATTGGATGATCTCCATAGAGACTAACAGAATGTTCTAACATAGAGTACAATCAAACAGTAAAGAGAATATAATCAAACAGTACATCAGCACTAACAAAGACATCAATTTATGTTTGTGTGTGTGTGTGTAAAAGTAACAAAGACTTCAATATAGTTGGAAAAAAATTCTGAAAACAGGAAATAGACTGGTTCTAGAAAATGGTTTGATCATCTGACATCCAGCAGCCTTGTAGAACAAGAACTCCGGCAACCATGGTAGTTGCCAGATATACTGAATTTTAGTTAAAGCAACTGAATGAATGAATGGAGCGATGACAACATGAATGTCAAGAGGTAGCAAGAATACTGTAATTGAGAGCTCTATAGACATCAAGGAGATTGGTAGTAGAAAGAGGTAGATATCAAATCCTTAAATATATGGCATTG
>MSTRG.62714.1 Scaffold261 77000-77862
CTCGTGATTAGGTCCATTTCCAACTACCTATTCGGCACATTTTGTAGTAGGCCGATCTTTACTCGGCCCCTTGCTTAATCGACTATTTGGCCGAGTAAAGTTGGATTCGAGTTTGCGGGCCGATGCCGAGTGCCACGAATTCGGATTCTCCCAGGTTCAACTATCCGGAATCCCTATGACTCCCAATATTCGGCCCCCACATAAACAATGCTGAGGTGAGGTCCCGTTGAAAGGTTCATATTGTACATCATTCTTTAAGATTGTTAAGTATGATATATATCATGGGGGCATTTTTTCACTTGCATAATTTTGTTCATCATTTCCTAGTAAGTGGCAGAAGTGCTAGTCGAACTCAGTTGTGGTTCTGAGGTTCTGAAATGGGGAGGGACAGTCAAAATAGACACAGGTTGGACTGATATGACAGAAGTCTCAACATGCTGAGACTGGTCTTTATTGGCCAAACTATACTACTGTTTTTGACTTTGTGTTCTAATCAATTCTTTTTGGCTCCAGATATCACTCACTTGTTAAATTGCTTAAAAATCTCATACACAATGCTCGGCGTTGCCAACATTTGAGGTTATTGGAAAAGCACTGTTCCATTCTATCCTCAGATCAAAATACTGAAGGAAGAGTTTGCTCCATCTTTGAGGTTAGTATTCCCCAGAAGACTGTGTTATGTTTGTTGTCGTAACAGAGGCAATATAGTATTTTTGTCATCTTTGAGGTTAGTATTTCCCAGAAGACTGCTATGTTTGTTGTTGTAACAGAGGCAATATAGTAT
>MSTRG.35777.1 Scaffold1814 968412-1006256
CTCTTTTGCCTTCTAATTCGTCCAAACAGAAATGGAACATAGGGTTTCAATCTCTCTCTCTCTCTCTCTCTCTCTGATGATGATGATGAAGGCTGAATGAATTGTTGAGGGTTACTAGGCTCATCTCATCTCCTCTTCGGTTGTGAATCCGAAATCAAAGGAAGGTTTCAATCTCTCTCTGGACACCCCTTCTTCTAGGTCTTCATCTTCATCTTGAACAGAACCAAAAAATCCCCATCTCTCTCTCACTCTCTATTCTTCTTGAGCAGAACCAAAAAACGCTACCTAGAAAAACCCACTCTTTGTTCCCTTACATCCCTTACAACCCTTCGGATTTCAATTTACAACTCACAAGGGGTAAGATTTGTATTCAGTCGCTGTTGTACCGACACTGCTTCCTTCGAACTCGCAAGGTTTTGCTTCTGTTCTCATTGATAGTTTCCTCAATTTGGGCAGTTGCATAATGGATCCTTTATGCAACAGCGAAAATATGGATACCATAAGGGCACTCTTCAGTGTGGAACTTGTTAGCAGTTTGGTGTCATAGCACACCAGTGGCCGGCAATGCCACATT
>MSTRG.74055.1 Scaffold30 1848881-1850193
CTGGCAGATTTTATCCAGTGATGAGAAACAACTCTACAGCTTTTCACCCTACATGCTGTCCTAGGGTTTAGCCTATTAAGGGGTTATTTAGAATTATCTAAATAAGTGCACTTTTTGACTCTTTACGAAAGCTATGCAAAAGAATAGAGAGGTGATGTGACCCAAAAAAAATAAAAACATAAATAAGTGCACTTTTTTAGTTCATGCAAGCAAACTCTAAGTAACCAACTGTCTCAAAAGCTTCAACCGTTAGGAATTGGGCCCAACAATGTATATCAAGCAATCTAGCATCCTCCCCCACATGTAATCGTGTGTTGCGCGTGGAGATGGAAATATCCACACATCAAGAGAAGAAAGATGCAAATGGGAACCGAATACAAAAGGAAAGACTTGAACACAAGACCTCAAACCAGAGATCTAATACCATGTTAAGTTACCAACTGTCCCAGAACCTTAAGCTATAATGAAATGGGCCCAATAATAATAATAATAATAATATATTATATATATAGCCTATGAAGCATGAACACGTCTCTGGAGGCAATGTACATGTGTTGGACACGTGTCGGACATGCAGTGGACACGTGTCAAACACTCTACAAGACGTGTCCCCTTTTTGTTTTGAATTTTACCATCCGGACATGCTTTGGATCACAAGGACACATTTTGGACACTCTGTAATACGTTTGGGACACTTGCAGGGCCAAAATGTAATTTTTAAAACTTGTAAATGGGGTAAAAAATGTAAAAAGATAAAACTTGAGAAACAGACAGCTAGATTGAAACCCTAACTTGTTGGAGAAGAGAGAGAAAGAGAGGGTGAAGAAGCTGTTTGTAAAGGTGAAGGCCCTAAACTTGTTTAAAGAGGTGGATCGAAGGTGATGAAAATCATGGAAAGAAAAAAAAAAAGAACAAATCTAGAATTTCACATAAAGAACATTTAGGGCATCAAGAATTAAAGATTTGGAATAATTTTAAGTCTTCATGTCATTATAGCAGGTTTAGTAATTATGAATATAATGGTAATTTCAATAATTGTTGGACATGGATTATAGGGGTTGCCCATGGATTTTATTTTTAGGTTAAGTTATTAAATTGGTTATTATATATAGGTTTTATTATGTCTAAAATAATC
>MSTRG.119732.1 Scaffold558 3380599-3384068
CGGGATTTTGTTTTCATGTAAAATCTCATCTTTTTTGCTACTCATGATAATATATCTCTGTCAAGTACTTTTTAAGGTGCATTATATTTTGAAAAAGAAGATTAGACAACAATGTGGTGGTTGTCATAGCATCAATGGCTGCATTCAAGTGAATATACAAATAGCAATAGATAGTTAACATTTTCTTACAAGTAGCCAAAAATAACATCTCATCTTTCCGATCATTTCACTGGTTTGCGGTAGTCTTATTGTTGTATGTATAATTCTCTCTATCCTTTTATTGTTTTTCTTGCTGAGTCATTCTTATGAAATAAACCCCACTATCATAAGCTCACCATAAAACCAATAAATAGAATGCAGACAAAATCCCTGCCAATGCGAAGAACCTCCTCCACATTCTACAATTTAATGTGCCCCTATGCCAGCATCTTAGACAAAAGAAAGATGCAACAATGAATTTCAACATGAGTAGCACATAGTAAGTTAGGAGTCCATTTGTTTTTCTTAGGATTCAACTTCAACAGTTTTCCACAAACATCAAGATTGTAAACAGTCTATTTCCTCTTCTAGTAAACTGCATTTTTCTTCAGATAAGGTTTTCCTCTCCCTGATTGTGTCTCTTACAACTTTAGGATCGTTAACTCTTCTTCCTCCTCTTGCTTTTATATTTTCCACTCACTTTCTGATTGCTCTAATGAGCACTTGCTGGTTAATCTTCATTGCGGTTATGCAGTGAACAACCATTGTGCACTAGTGGGTATTTGTATGATTGCTATGATTAATTCATTAATGATGGATTCTTTCTTTAAAACTTAGTCGAGAACCAGGGAGTGTGCTCTACTTGCAGCATTGTTATGTGCACTAAAGTGGTCTGAGAAGTATAATTGTATTCATGTTAATGTCTTTACTAACTCCAAATCTTTGTTTAGATAGCTGAAGGGAGATAGAGAGATTATGGGTAATGGAAAGTAGTAATCTTGTTAGTACAAGATCCTGTTTTATTTGTCTTTCTGTAAGTGGCGGTTTTGATTGTCTTCTTGTAGCAGTGCTGCATGGACTTGACAGTCTAATGAAGATGTTGGGAAAATAGCATAGACTGCCTGACCAGGTTAAAATTTTCTCCAGATAATATATTTTTGGCAGAACCAATAGTTGATTTTAATAAAGTTATATTTTTGTTGTTGAAACATAAATGTGCGAGTGATGGGTAACTCCATTCCATTATATGGAGCATGAGACGGGTATTTTGTCATTTCCTTATTTTATTTCAGAAGGTTTCAATTTAAGCAACAAGAATAGGGAAAATATATTATAACATAGAAACCATAAGCTTACCTTGCTTTAGTGCATGAGCACGCTTCATGTTACTTCTGTACTGGGGTGTGGAAATTTTTCTCTTGTACTACTAGAAAAGCATGATATGACTAAATTTCTTATAAATGTTGGACATTTTGAGACGACTATTAAACCTCTTTTTTTTTTTTTATGTATAAGGCCTGACACAATCATATGAAAGAAGAAGAAAATTGTAGCTTGCACAAGTTATTCCACCTGAATTGGATTGAAAAATTATGTCTGTTTTCTTAATTCATGTATCTGTTTTCTGCTCTTTGCTGAATTTATTTCTGTAGAAATTAATGTGCCTGAAAACTCATTCTCTGTATGGGAAGATCTCTCTCTCTCTCTCTCAGTCTTCAGTTGAGAGGGGCGCTGAGTTGTTGCCTGGAAAAACTAGGCAAGTTGAATTCTGTGTCAAAGTGACCTCAACATACGTGATTTCTGTGATTGGTGATCCTCAGGAAGAGAACTAAGAAATGTCCATAGGGAGAATGGCACAGTTCTGATGTTTGAAGTGACAAAGCTGGAAAGTTGCATTGCCGTACATTTTTACTGTTTCGTAGATTGATTGATTGGCACATTTTTACAGTTTACTATTATTATTTTTTCTTTGGGGATGCCCGCTTGCAGGGAGGGGAAAGTGAAAATAATTAACTTGCAGTGTTATGAGCCACATCGGGGCTGAACCTTCTGTATCAGAGACATATTTATAAGGGCAAACTTCACTTTATCCCATCATGGTTTTACTCCTTGTGTAGTTACCCGTCATTTGGAAATATGAACATAATCCCCTATGGTTTGTTGACTAAAAAATGCATCGTCATACATTCTGTCCAAGTTAACAGCAAGTGTGAAACATGTGCCTAGACATGAAGTGGTTGCTCATATAATGGCAGGTGGTAAACTGCATGTGGAGTAAAGCATAAGCGCGTAAGGTGCATTTTGAGTCTTAAAAAAGTGATGAAAATGGTCATTTCCAGATGTCAAGGTAAACCGCACATGGAGTAAATCACGGGCAGATAAAATGAAGTTTTTCCTATTTCTAATTACTGAGGCAGCATTACAGACCTCAGAGAAGAAATGTTTGAACTGTGTTGTGGTCCTTGAAGTAAATAATATAACCTATACACATATCTACACATAATGTTATGTGTAGGTTACATATTTCTATATGGTATAGTGTGTGAAATTGCTTGCTCTCAGATCTTCTGTTCAATTTGTGGGCTGCTGCTGCTAAGTCAAGAGTGATTGCATAGCTATTGTATTACAATCTGGACAATAGCTTTTCCAGCTAAAAAGAAGCCCTTGTTTTCTCAAGGGAGATAAAAAGGTGGTTGTTATTCATATTTGTGCTATCCATTGGCTATCTGAAATCCCGGAATCATTTTGTTTTGAGCAAGTTACTCCTCTTCAGATTCTTTTTAGCCAAAGATCTTGCCTCCTCTTCCTTCTGTCAAGGACTGGTCTATTTCCTCTTCTGTGAAGTGGCGGGTATTGATATGGTTACCATGACTAATTCATTAATGGTGGGTTCTTGCTTTAAAACTTGGTCGATAACAAGGGAGTGTGCTCTCCTTTCATCATTGTTTGTTTCGATAAAATGTGCTCTCCTTTCAGCATTGTTGTGTGCACTAAAGTGGGCTGAGAAGTATAATTATATGCATATTAATGTCTTTACTAATATGCATATTAGTAAAGAGATTTTGGACAATAGATAGTAGTAGTAATCTTATTGGTACAATTGGATATGCCAATATTAGATCCTGTTTTGTTTGTATTTTTGTTAAGCATCAGTTTTGATTGTCTTTTTGTAAGCTGTCTTGATATGTGGTGTTTTTGTTTTCTGTCACAATCTCTTTATGTACTGTTAAACCTTTCTAATTATCTATGAAATTATTTTTTTTTTGGCCAAAAAGAGTTTGTTTGCATTTTAATATGGGGGGCTTACACCCTCGGATCCAAAAATTTATGTTAGTTAATTAGTATGTCCTGTACAGGG
>MSTRG.72866.1 Scaffold2960 727940-744612
CTTGATTGCATCACAGAAGTGGAAAACTATGAAATGCCAAAACAGATCCTAGATTGTTTGACTTGTTTATTATGACTCTCATTAGTGGAACAGAATTAAGCAATTTGTCTAAAACTAGCTTAACAACCTTTGTTATGTTGAGTCACTGACTTTGTACTAAGGCTTAAGAGTTTTTTGTTTCAACCTGAGTTTATGCAAAGATGCACACCACACAAGGAATAGGGGAAAAACAGGAAAAGAAACAACTAACAGTAAATCTTAATTTAATTAAATCACTTCCACAATGATAAAAAAAAGAGTTGGTTGTGCATTAGTTCCAGGTGTTGAGGGAAAAAAAAAAATCTTCTTGTAAACAGGAAAAAATTGATAAATGTTTGACCAGTTCTTATCAAGTAAACCTTATGTTGGAGTGCTGAAAAAATTTATTATATATCTGCGTTTAGTCATATGCATATACTAATACTGACCTATTTTCTGAAGTAACCACTTCAGCCTTTTTGTTCCGTGTTTTTGTTTTTTTTTGGAAACTGCCGATGTTCTTAATGAGAAATAATTATTGTCGAAGGAAGAAATCTGAAAAACTGAACCACTCATTTAAAAAAAGAAAAGAAAAGAAAGAAAAGAAGTGAGAAATGCATGAAGATTGTTGAATTTTTTTTTATACCATTATAATTTTAAAAGTTTGACTTTTTTTGAACATATTTCATTTTAACAATTAGACTGGCGACTGGTTGATAGTGACAGAATGAAGTGGCCACAGAAGCACTGTTATGTGAGTATTGAAGACACCGATTTTCTTGCTTGGACAGTATGGATGATCAGATCAACTGGAGGAAAACTGTGTTGGTTTAGTATCTTCTTATTGACACAGAATAAAAGATAGCAATCAACCTAATTGATTGGATGGCACACCAAAAAAGTTACAATGAATGATTGCTGCTTCCATTTTACCATGATTAAAATAATTGGAGAATGCTAATTGCCTTTAATAATATACAAGCAGAGTTGTTGGTTTGATATAATTATGGGTAGATGGTAAAACATGTGACCTTTGTCATGGCGTGGATAGAGTGTAAATGGTAAAACATTAAAACCAAGCATGATGGAAGCAGGAGGATATGTCTTTGTATGTGTGTAGAGATAGAGATTGCATGTGGACTTGAAACACAGTAGGGTATACATCGCACTTGTCAATGAAGAAACATTAACAGAGGCAAAGATCATGGAGTTGGAAAGATGCCTGGTAGGTTTTATTACCAAGAACAAAAGAAAAACTAGTGGCTAGTGTTTCGGACATAGAATGGGAAAAGATAGTAGTGTTGAAGCAAAGGGCTTTTCCATTCTAGGAAGCAATTACTGGAATTCCTAGCTTTTCTTCACTGAGTGAATGTGTTCAGATTCTTTTAAAATTGGATTGCACTGGATACTAGCCATATTCTTTTTTGGTTGTAGTATTAGAGGGTTCTTGAATTATTTATTGAATTCCCTATTATTGCTGAAAATTTGAATTAAACACATCTCTCTCTCTCTCTCTCT
>MSTRG.106435.1 Scaffold4469 260296-260590
GCTGCTGCTGCTGTTCTCTCCTGGCATCAAAACTGCTTGTGGACTTCATGTAATTTGGCGATCCATCCAAGGAGCCTTTGATAGCAGCAGATTGCTTCTGTGCTGGAACATCAAGAGGTGGTGGTGATGATCTTAAGCTCTCAAAATCGGAACAACGCTTGAATGATCTTGATTTCTTCATTTTCTTCTTTTTCAGGTCAGCTCCCCTGTTCTTGCCATCCTGCTGATGATGAGGAGAAGGTGGTCT
>MSTRG.25319.2 Scaffold157 39212-88075
CCAACCAAAGCCAGCAGCATGCCATGCCACGGCGAAGGCAGCCCAGCCAAAGCCAGCAGCATGCGATGCCAAGGCCAGCAGCATGCCATGCCACGGCCAAGGCAGGCCAGCCAAAGCCAGCAGCATGCCATGCCAAGCCAAGGCCAGCAGCATGCCATGCCAAGGCCAAGGCAGCCCAGCCAAGGCCAGTAGCATGGCATGCCAA
>MSTRG.103669.1 Scaffold4319 479930-480361
ATCATGTCAAAAATCTAGGACAGGGTAACCTTACCCCCCTCATAGGGGTATTTTTGGTTCTTTTACTTGTTTACCATCATAGCTTCAGAAAGACCCGATATTCCCCAAGTTGTGTGGACTTACTCTGGCAGGCTTTGCAAAGCTCAAGACCTTGTTGGTGGTCAACCAGTGTTAGTCTCGCTTCCGCCAGTTGTTCGACGAAGATGGAACAGACAGTCAGCAGCACCAATACAAAGTAGTCAGCAAACACCTATTTGT
>MSTRG.102177.1 Scaffold426 937572-946687
AAAATGAGCCATGCATGTGTTTGATTTATGGAATTGACCTTCAAAATGTTATAATTTGATGTTGGTATCATGTTAGCATAAATATATTTGAAGTTTGAGCCATAAAATGTAAGTTGGATTGGTTTGAATGCTGGATTTGAGCTCAAGAACTTAGCTAGAAAACCCAAAAAATTTGATGTCCGTTCGAGCGAGGAAACTGCCGCTCGAGCGTGAAATTCGTGCTCCCAGCATATTTTGCAGACATGATTCCCGTTCGAGCGGGGAAGTTCACGCTCGAGTGGGGAGCCATGTAGAGAGGCCTTCCGCTCGAGCGCTAGAATGCACGCTTGAGCGTAAATTCGACATAACCAGCACTTTTGCAGGCCTTAAGGGTCCGCTCGAGCGGGTAAGTCCACGCTCGAGCGGGGACCCTGTTTTCTGAAATTTTGAAAATGCATTCTGTGTTCTGTTTTCTGTTCCCTTTCACTTCTAAGCACTCTTAGGCATACATTGAGCATTGTAATTGAATTAAAGAGATAAGAATCAAGCCTAAAGAGGAATGTGTGAATTAAAGAACGGATTGAATTATTTGTAACCCAAATGTGTTATGTGATATGTAGAGTCAAGCTCCAGGGCAAATCCACAAGCCGATCAATGTGAGTAACATCTGAAATATGTTATTGTCCAATTGCTTACTTCTATGTAAGTTTTGTAAAGTTCATTAATTTGAATGGTTGACAAAGTCTGATATGAAAGTTTGAAGGGCCTAAAGGCCAGTTTGAAATGAAAGTTTGAAGGGCCTAAAGGCCAGTCTGATATGAAAGTTTGAAAGGCCTAAAGGCCAGTTTGAAATGAAAGTTTGAAAAGGCCAAAGGCCGGTTTGACATGAATGAATTGGGTCCAAGGCCGTCTGATGTATAACGTTCCAATGTATTTTCTTTATTTGATATTATTCACTGGGCTTTCGCTCATACTCATTCATGTCTTTGTAGGTAAGCCAAGAGAGGTCCAGACCCAGCCCCAGTGAAGTCTGTATGGAACAACCGAGTTTTGGAGAGTCACCCATGTGTCTCACGCACGAGACTCGCCTTCGCCTTTTTGTCATTTTGTTCTATGTTGTCATGTTGGCGAAGTCTTTGTAGATGTCGGTATATAGTTTTGATGGGTTGACTTAGTTTTCGATGATCCTGTCTGTACAAAAATTTATGCTACTGTATATTTGTTGTGAGTTATTAATGTATGTATGTATAGTTTGTTTTGGCATGCCATGTAAGCACAGCTCTATGGATAAAGTTTTAAATTTTGCTTCCGTTTGGCCCCTTTACTCTGATGAGTTATGTTTGGTTTGATTTGAGGCCGTAGGTAATCTCAGGATTACTGGCCGGTTATGGCCTAAACCCATTGGGGCGGGTTCGGGTCGTGACAACCTAGTACCCCTAAACCTAGGGTTTTGTTCCCAATACTAGTTTCTTTTCAACTTAAGACCAACTAGATATTGTTTAATCTCATGATTAAGCTCCCTAATCACTCCCTATTCCATTAGACTCCAAGTAAATCCTAACTTTTCCATCCAATTCCAACTAGTGGGCCTTTATGTCTTTTTACACCAAAATTTGCCTATAAATACCACCACCACCTAGCTTGGCAAACACAAACAACACACTCACGCACACATTCGGCCTAGAGAAGAGAAAGGAGAGCAAGAGAGAAGTCTTGAGAGGGAGAGGAAGGAAGAGGAGAGCCATTTTGTTCAAGCCTAGCAAGTAAGCCACAACACAACCTTCTCTTTCATTTTCCTTTTTCAAATACATGTTCTTAAGGGTTCTAAACATTGTATTCAGTTGTGTTATTGATGAGTTACTTGTGTTAAAAATGATAAGAGTTGAGCCATGATTCTACCTCTCTTGTATTTTCTCTCATTTCAGCACAAAACTATCTTTTTCATACCAATCTCTCAAACTTTCCAAAGACACACCTTCA
>MSTRG.84202.1 Scaffold344 3843907-3848024
TTTTTTTTCAAATGTTCTGAGGGGTTCGGATTTTATTCCAAGGAATCAATCAAACAATCATCCCCTAGCCAAATATCTTATAAAGGAACCAAAATTTTATTCCGAATGAGAGACTTGGTCATCACTTCCTTGTCTAACATTTCTCCATAAAATTAAGGTTCCCTCAAAGTCAGTGGCCCAAGGATTTTCACTCGACGAAAAGAACTTTCGATAATTTCCGAACTCTACTCAAATTTTATTTTAAAAAAATTTCCAAGGAATTTAACATCGTATTTGAAGAAATCAATCAAACAGTTACCTTATAATCAAATGTCTTCTAAGGAAATTCAAAATTTCATTTCGAAGTGAAAGACTCGGTCATTACCTCCTCATCAAACCCTTTTCCAGAAAATCAAATTCTTCTGAAGTCAAAAAACCTAAAGATTTCTGTCTGATCAAAGACTTTTCATAATTTCTAAAGTTCTACTCGTGCTTTCTTTCAAAATTATTCCCTCCCTACGAGCCTCGGATTTCATTCCAAGTATCTAATCAAACAATCGTCTCCTTAGTCAAAGATCTTTTGGGGGATTTGGAGTTTTATTCAAATTGGAAGATTTGGTCAGCATTTCCTTATCTACCATTTTTCATAAAAGCTGAAATTCCCCTTAAAGTCAATGACTTAAAGATTCTTATTCAATCAAACACCTTCCATAACCTCCAAGGCTCTACTTAAG
>MSTRG.32332.1 Scaffold1749 2264727-2265418
TGCAAGCTTGGAAGGTTTTTTGGATTGGCAATGGATGAATTATAGTTCGGGGCGCATCAAAGGCTTACATTTTGAATTTTTGGATATATTTTGTCATAGGTTTTTGTTATGAATTTGCAAGCTTAGAAGGGCTTTAGGCATTACATGTTTGAAGTTTGGGATTGTAAGAGATTTGTACTTGAATTGGATGTTTTGGATTTGATATGTTGTTTATATTTAATATGGTACTACTTTTGAATTTAGTTTATATTTTGGATGCTTTGCGCAAATGTGTTGATTTGAATTATATTTTGCTTATGTTTATAGGTTTATGAATGATGTATTGAACAGGGAAATTGTTAAAAAAAATTATTTATAGGTTTATGAATTATGTATTAAACAGGGAAATTGTTAAAAAAAATTATAAATAATGAATTTTTGGTGACAGGTTTTTTTAGTTATAAGTTTACTTTTGGTGACATTTTATTTATGTTGCTGAAAGTATGTGTCCATAATTTTTTTAGCGACCCAAAACTTGATTGGTCGCCAAAAGTTTT
>MSTRG.149145.1 Scaffold897 448113-449833
TTTAGTATTTTTTTTAGAAGTTTAGAAATCGCATTGAAAACCCATTCAAAAAATTTTTTTTTTTTCTTCACATTGCATTGTATTTTTTTTTTTCCTGGTAACATTATAAAAATAAAGGAATATGTTTGGTGTCCATTTTCAAAATTTTAAAATCAATTTTATTATTAATTTTAAATAGAAACACATATCAAACAAGTAGTAAGATTAAGACGAATCTGAGTCTCTGAGCCCCTCCCTTCCAATAGTGTAGCCGACCAAGAAAGAAAGGCTTTTAGCTCGATCAGAAGGGAAGAAGTTTATGGCAACTAGTGAAGGCGGGTGGTAGATGGATCTTCCCATGGGTTCGGTCGTGAAGAGAATCCGATGTATCTTCTTTCTTTTGAAAGGACTGCTTTTTCGGGTGGGCTCTACTTCGATGAATCAATCCAGGGCCCCTATCACTAGCAGTCCAATGCTTTCCCTTGGCTAAGTCGTGAACAAGGTCTCAAGAGTCGAGGCTATAATAATGCTCCAACTTCGTTTGGATAGGGTTCGGATTATCGTGAGGTGGGAAAACAAAGAAAATAGTGGTAGTTTTTTATCCAAGTGAAAGACAAAAAATATAGAGAATGGAATTTTTCATCACTTGTTTCTCAATTATCTTATTGGAAAAGTAAGACACACACCAAGAAACACGGGTTAAGTAACAGAGGTTAGGTACTTGCCAAATGGAAACAGATCTATTTTAATTTTGATTTTTTTTTTTTAAAAAAAAGAGAGTTTATTCTATG
>MSTRG.116824.2 Scaffold5276 1159137-1159427
GTCCGAACGCCCAGAGAGGACTGGGCTAGCTCCATGAGAGCCACCTCCCCTGCTGTCTTTGCCTTCCTCATGTACTTACCCATCTATCTCATCAAGGTAGGGAGAGAGAGAGAGACAGAGAACAGGTGGGGGAGAGAGGGTGTTCTGGGTTTCTGTTGTTGGTTAGGGAGGAGAGAGGGGGAAGGGGGCAGTTTGCTGTTGTTTTTGTTAGAGAAAGAGAGAGAGAGAGAGAGAGAGAG
>MSTRG.82902.1 Scaffold3375 342177-342408
CAATAAGTATACATCAATTTGACAAATTCTATTATTTTAAGAGGGACTTACGTGTCGGTTCTAATAGGTAGACTTATTGTCCAATAGGTCCTACGATAATTAAAAGCGTTTTTCATCAAACACTATTAAAAATTGTCACTAATTGTTAATTATCAGCAACAGTTTAAAAATTGACACAAAAAATGTCACTAAGTTTTAGAGACAGTTTAGAA
>MSTRG.22489.1 Scaffold1500 74033-102567
CTCTGTTCTGGTTGTTCTGTACTCACCACACAAGCTAAATAACCATGACACCCTTTTCTCAACATTCGGTTAGCCTGAAGGGAAGAAATAAAACAAATAGAAGACCCTTTCCCATCTCTCTAAAAGAAAAACTCATGTTGCCCCGGCATAGCAAAAACTACCCTCTTTCTAAAACAATCAATAGAGGCATGATGCTTTGTTAACC
>MSTRG.85258.1 Scaffold3482 758762-770078
GGCTTCTTTTGCTAACAATGGTTTGGGGTTGGGATTATAGGTTCAGCAATGACCTCAAGTTACAAACTAGTTGGGGATACTAGAAAGTTAAATTGGACTACATTAAGTATCATAATCAGACTGTATGTTCGATAAAGTATCATTTTGTTGCTTCTCATAAAAAATGATAATAATCAGACTGCATTTTTGCAACCTGAAGGTGTTCATAGCTATGGAGAAGGATCTGAGGGATAGAGTTTGTTCTTGGAATGGGGTGGTTGATTAGCAACCCAATTGGGATATTTTCCAAGCATGGAATCTTCCTTTGAAAATCTT
>MSTRG.31649.2 Scaffold1723 1099986-1101391
AAACAATCCTCAGCATCATCACCATTATTACCCATTCCCAAATTAGAAATGCCATATAAAAACCCTATGGAATCCAATTATTCAAACTTCGAATTCAATTCAGACTAAAAGGATTGCAGATTATTATCCAATCAAAACCCATATATATACACACAAAAATTGAAAGTTTTAACAAAGAACGAAGCTTACGAAATACGAACCCTGGATGTAGAAGTGCAAGTGAATGACGAAGAAGCCGGGTCGACTGAGTCGAAAATGGCCAAAGTTCCATCGATTGAACCAGTAGCCAATCTCTCGCCACAGTAGTTCCATGAAGAGCAGGTCGTGCCTTTGTCAAAGGTCACCACAGACTTCTCCATCTCTCTCTCTCTCTCTCTCTCTTTCTCTCTCTAAATTTCGATTTCTTCTTCAGTGATCGCAGAAGAAAACTATTTCAACGTTTCGACATTGATGGAAATCCAAAACCCTTTCTCTAGGATTTTTGTGTTAATAGCAGCAATCTTTGTCAAAACGTTTATTTTCGCTGCATGTGCGAATTTAGCTAAAAGCAGCCACGCA
>MSTRG.22301.1 Scaffold1496 848901-855730
AATACACAAAAAACAATAAAGGGTAAAGAGACAAAACCGAAGCCTGCACGGAAGCAGTTTCCTTAAAACAGATTTCGCCGCCTCACGGGTCGAGTGCTTGAGGAAACCCGACGTCTGTCTCCCAGGATACGACGGTCAAAACCAGCTACGGCAGAAGCATTATCTGTCTAGCTTAGCAAACAAAACAATGGCAGTACTCTCTCACAATAGGAACTATCAAGCAAACTGACTTGTAAAATGGAAGCAAAAATTTCTATATTGAAACTTGACAGGAGGGTCTCAATTTATACATGTATAGGGG
>MSTRG.69984.1 Scaffold286 683760-683984
AATAAAAAGAACAATGACAGTGGCGTGTAGTGACTTTTTTTGTTTTTTTTTGCCTCGACAAGAGACAACCCTGATGGAGCAATTATTTATTACGTTTTTATGGTAGTGATGAGGACATATCACATAAAAATCTCACAGAAATTAATAAGGAAAATTAATATCTCAGTGAACCTCTAAAAATTAATTATCAGTTGATAGAAAAATT
>MSTRG.25659.2 Scaffold1579 793810-813553
TATTCTTTGATTATGAGCTCTAACTTGTGATATTCTTTGATTATGAGCTCAAACACTCCTTTGTCCTAATTTTGCAGTTCTCGCACACTCTCTCTCTCGTTTGAAGCTCGATGTGAGAAAATGGATCATGAAAATCGATTTATCATTACTCGTTAACGACAGGTCTAACATATGAGATGTCAAGCTTCAATCAGGTAGATCTATCATTTTTCACACACGCACACAGATCACGAAGTCTATGGGTTGATTCGTCATCTTCTTCACACACACACACACACACTCCTTTGTCCTAATTTTGCAGTTCACACACTCTCTCTCTCGTTTGAAGCTCGATGTGAGAAAATGGATCATGAAAATCGATTTATCATTACTCGTTAACGATAGATCTAACATATGAGATGTCAAGCTTCAATCAGATAGATCTATCATTTTTCACACACACACAGAGAGATCATGAAGTCTATGGGTTGATTCTTCATCTACTTCGTATTTTTATTTTTTTATTTTTTTCGCCGATTTGAGATCTGAAGCTTCGTTCACAACAGATCTATCTTTTCCTTCATTTTTGTTTTTTGTAGATGTGGTGCATTTCTCACTCTCTCCGCCTCATATGTATGTGTATCTATAGGTCTACGAAGAAAACAGTGATTAGTTCTCGTTTTTGTTCAAATTATCAATTTTATTTGAAAGGCAGGGTTGGTCTTCTGTTTTTGGTTGTTTTGTTTCTAGATCTGAACACGACTTCATTACTTCTCTGAGGTTTGTTTTTGTTTTCTTATTCTTGTTTTTTTACATCGATTACCGATTCGAATTTAGACTCATCAAAGTTCTACTTCTCTCGAAGATCACTGCTTGATTTTTTTTACTAATTTTAAGTGTTTCAAATTGATCTTATCGTTTCATCGTCTTGTCTGATTCAGATGGCTTCGATGATGATCTCTCTTGCCTCTGCATCTGCCTCAGCTTCAGCAAGATAATCGCAAGTTGACTGGTAAGATCCAGTGAAGGATTCAACCATGATCGGATTGCTTAGAAGGTTTTAACTCGTTTGCTGAGAATGGATAGATGAGCATCATAATATGTGCTGATTTAATATTGGTTTTGAGATTATTCCAAGCAGATCTAATTGAGCATTTGTGGCATCAACATGGAGATTTGTAAAAACTTTATGTATTAGATATAGTTTATTTATTTTGAAGTTTATTTCCGACTTTGCTATTTGTGATTTCCCCCTTCCCGAGTTTGTTTCTTGATC
>MSTRG.121525.12 Scaffold572 473554-497871
TTTTTTGACTTAGATTTCAAACCGGAAGTCCCGTGTTAGTTCCGTAAGTTTCCAATACTTCTATTGGTCCTTCCCGAGGTGTTTGACGCATTTCCTGGGCCTTCCCGTGACTGTTACACGATTTTGGCTCCGGATTTCCTATTTTTAAGCTTAAGTGTGAAAAAAGTGACTTTTCCGACATAGTTTTCAAACCGGGAGCCCCATGCTAGTTCGGTGAGTTCCCACAACTTACATTGGTCGCTCTCGAGGTGTGAGGTGTTCCCCGAGCCTTCTCGTGACTGTTACAAAAATTTGGCCCCCGATGGCCTATTTTCAAGCTTAAGTGTGAAAAAAGTGGCTTTTTCGACTTAGTTTTCAAACCGGAAGTGTCGTGCTAGTTCCGTAAATTTTCACAACTTACATTGGTCCGTCCTAAGGTGTTTGATGTGTTCCCCGGGCCATCTGATGACTGTTACACGATTTTGGCCCCCGATGCCTATTTTCAAGCTTAAGTGTGAAAAAAGTGTCTTTTTCGACTTAGTTTTCAAACCGGTAGTCCTGTGCTAGTTCTGTAAGTTTCCACAACTTATATTGGTCCCCCTGGAGGTATTCAAGGTATTCTCTGGGCTTTCTCGTGATTGTTACACAACTTTGGCGCCCAATGGCCTATTTTCATGATTAAGTGGGAAACAGTGCATTTTTTAACTTAATTTTCAAACCAGGAGTCCCGTGCAAGTTCCGTAAGCTTTCACAACTTGCATTAGTCCATCCCGAGGTGTTTGCGGTGTTCCCCGGGCCTTCTCGTGATAGTTACACGATTTTGGCCCTCGATGGCCTATTTACAAGCTTAAATGTGAAAAAATTGAACTTTTTAAATGTCTTTTTCAAATTAGTTTTCAAACCGGAAGTCCCGTGCTAGTTCTGTAAGTTTTCACAACTTACATTGGTCCCTCCCAAGGTGTTCAAGGCGTTCATTGGGCCTACTCGTGACTGTTACACGATTTTGGTCCCCGATGGCCTATTTTGTAGCTTAAGTGTGAGAAAAATGTCTTTTTCAAATTAGTTTTCAAACCGGAAGTCCCGTGCTAGTTCCGTAAGTTTCCACAACTTACATTGGTCCCTTCCAAGTTGTTTGATGTGTTCCATGAGCCTTCTCGTGACTATTACACGATTTTGGCCCCCTGATGGCCAATTTTCAAGCTTAAGTGTGAGAAACGTGCCTTTTTCGGCTTAGTTTTCAAGCCGGCAGTCCCGTGCTAGTTCTGTAAGTTTTAATAACATATATTGATCCCTCCCAAGGTGTTCCCTGCGTGTTCTACTGAATGCTACACGATTTTGACCCTCGATGGCTTATTTTTAACCTTAAGTGTGAAAAAAGTGCATTTTTTGACTTAGTTTTCAAACCGGGAGTCTTGTGCCAGTTCCGTAAGTTTGCACAACTTACATTGGTCCCTACTGAGGTGTTTGACGTGTTCCCCACGCCTTCTCGTGACCGTTACGCGATTTTGGCCCCCTGATGGCCTATTTCCGAACTTAAGTTTGAAAAAAGTGTCTTTTTCCACTTAGTTTTCAATCCGGGACTCCCGTGCTAGTTCTGTAAATTTCTACAACTTATATTCGTCCCTCTAGGGGTGTTTGAGGGGTTTCGCTAGGGTTCTCGTGACTGTTACACAATTTTGGCCCCCTGATGGCCTATTTTCAAGATTAAGTGTGAAAATAGTGCAATTTTTGACTTAGTTTTGAAACGAGGAGTCCCGCGCAAGTTCCGTAAATTTTCACAACCTGCATTGGTCCCCCCGAGGTGTTTGAGGTGTTGCTTGGGCATTCTCGTGACTGTTACACGAATTTGGCCACTGATGGTCTGTTTTCAAGCCTAAGTGTGAAAAAATGTGCATTTTTTTTTACTTAGATTTCAAACCGGAAGTCCCGTGCTAGTTCCGTAAGTTTCCACAACTTCTATTGGTCCTTCCCGAGGTGTTTGATGCGTTTCCTGGGCCTTCCCGTGACTGTTACACGGTTTTGGCTCCCGATGTCCTATTTTTAAGCTTAAGTGTGAAAAAAGTGACTTTTCCGACATAGTTTTCAAACCGGGAGCCCCATGCAAGTTCGGTGAGTTCCCACAACTTACATTGGTCGCTCTCGAGGTGTGAGGTGTTCCCCGGGCCTTCTCGTGACTGTTACAGTATTTTGGCCCTCGATGGCCTATTTTCAGGATTAAGTGTGAAAAAAAGTGCATTTTTTGGCTTCGTTTTCAAGTCGGGAGTCCCGTTGAAATTCCGTAAGTTTCCACAACTTACAATGGTCTCTCCTGAGGTGTTTGAGGTATTCCTCGGACATTCTCGTGATTGCTACATTGTTTTCAAACTGGAAGTCCCGTGCTAGTTCTGTAAGTTTTCACAACTTATATTGGTCCCTCCCAAGGTGTTCAAGGCGTTCATTGGGTCTTCTTGTGACTGTTACACGATTTTGGCTCCCGATG
>MSTRG.57548.1 Scaffold2420 1711882-1713774
tcgtctccctttgggtctcaagggctggagaaaaggaacgtacaccgggagcccctgtgtggagccgctcctccacaccttggagccggatctggacGACTTGGGCTTGTCTCGACCCCGACGTGTGAAGAAACTATGTGAGTGGTATTTTTAATAAAGCTATGTTACACTTGTTTTGATAAATCTTGTTTTGCCTTGTCTTGAAAAGTATTTGATTTAGCATGAATGACTATCCCTACTTGTATATTAAACACTATCTTGTTTTGATGACATTTCTTGAAAGTCCTTAGTTGCAGGGGACTATAATGCAACTGCACTCTTGTCTTGGGAATGTCATCACCCTCTTGTATTAAGTAGATGTAATAACATCCAAAGAACTTGAAAGGCCGGCAATGAACTTGATTTCCCTCTTGATTGTAAAGTATGCTATGTATTGTTTTGAAAGAAATCTTGGATATCA
>MSTRG.114491.2 Scaffold5047 483845-494189
CCCCTGAGGCCGACAAGGAACCCCAATAATCGGTTCCAGGAAGGTTGTCCAAATCTTCATAACTTTATACAGCTGTTCACTTGTACAAATTTCACCACAGGAATATTTGATGAGCTGGTAAAGGTCTTCATGGATGTCTGAATCAGGATATTAAAATCCCATATATGGAATAAGCGGTTGTTTTGATGGCATGTGTGAGATTACCAAGATCTGTTTAACACAAGATCTGTTTCTTAACCTGCATATCTTCATTAGGTATTCTTGTTCACACTTCCAATTGCATATTAATTAGATTTGCACTTGTCAATTAGCAGTTCTAACCCAAATGCTTTTTTCCTTTAACAGCTATATATGTAATGGGTAAATATGCCAGCTATGAATTCAAAAGAATGAAGGCGATAATATTTTAATCATTTCTGGTAAATATG
>MSTRG.4837.24 Scaffold1094 1258421-1265776
CATCGGTCCCTCTCGAGGTGTTGGAGGGGTTTCGCTGGGGTTCTTCTCGTGACTGTTACACAATTTTAGCCCCCCGATAGCCTATTCTCAAGATTAAGTGTGAAAAAAGTGCAATTTTTGACTTAGTTTTGAAGCGAGGAGTCCCCTGCAAGTTCCGTAAATTTTCACAACTTGTATTGGTCCCTCCGAGGTGTTTGAGGTGTTGCTTGGGCCTTCTCGTGACTGTTACACGAATTTGGCCACTGATGCTCTATTTTCAAGATTAAGTGTGAAAAAGGTGCATTTTTTGACTTAGATTTCAAACCGGAAGTCCGGTGCTAGTTCCGTAAGTTTCCACAACTTCTCTTGGTCCTTCCCGAGGTGTTTGATGCGTTTCCTGGACCTTCTCGTGATTGTTACACGATTTTGGCTCCCGATGTCAAATTTTTAAGCTTAAGTGTGAGAAAAGTGACTTTTCCGACATAGTTTTAGAACCGGGAGCCCCATGCTAGTTCGGTAAGTTTCTACAACTTACATTGGTCGCTCTCGAGGTGTTTGAGGTGTTCCCTGGGCCTTCTCATGACTGTTACACAATTTTGGCCCTCGATGGCCTATTTTCAGGATTCAGTGTGAAAAAAGTGCATTTTTTTGCCTCGTTTTCAAACCGAGAGTCCCGTTGAAGTTCCGTAAGTTTCCACAACTTACAATGGTCTATCCTGAGGTGTTTGAGGTGTTCTTCGGACATTCCCGTGATTGCTACATTGTTTTCAAATCGGGAGTCCCGTGCTAGTTCTGTAAGTTTTCACAACTTACATTGATCCCTCTCGAGGAGTTTAAGGGACTTCGCGGGGGTTCTCGTGACTGTTACACAATTTTAGCCCCCCAATAGC
>MSTRG.67624.1 Scaffold2792 245106-250767
CCATGTCTTGGGGCTGTTTAGCATCATACTTCAGTGCTGGAATTTGCATGTTCATATGCCATGTTTCATCATTTTCCATGCTTAGTTAGAGTTGCATGTTGTATCTTAGGATCGGTCCATGCATTGGACATATTTGTGTGCATTTCGGTTGCCTCATTTCCATCTTATTGGCCACTGATGTGAGTGTGGCTGAGgcccactcacattggtataagtccatcctgcattgtgtatgccatgtttcaatgtgttgtgtatgctatgttgttagcattgtgtgtgccatgtagttgcattgcatgttcgtatgtttgcttgcatgcttaggtcgcatgtgcatcgttg
>MSTRG.14224.1 Scaffold1291 1595314-1596369
AGGAGTGTGAGATTACTTTACATGAAATTAGGCCACATCATTAGGGTTAAAATTGAGAAGGCAAAATTAAGAGATATAACACCACTATTTAATCAAATGTCAAGCTTTGACCGTGATAGTAATATATTTTTATCACATAAAAAGACAAGAATAAATATACATTCCATTCAACACAAATTGCATTAAAATATTAAAAAATTGTCTTAAATATTAATCTCTATATTCGAATAAAGAAAAAAAAATTCCTATAAACAACTAAACATCCAAAATATATAACCCTATACAAGAGTGATTTTTTTTTTCCCTTTTTTAGTGTGAGAGAGATACAAGAGTCATGTTGTGCAAGTGTAATGTTTTTCCCTTTCTTGTATATATATATATACATACAAACATAAAAATATATACAAAAATCTTATATCTTATACAGCTGAATTGCAAGACTATCACTTCAAAAAAAAAAAAAAAAACCAAAATGACAATTAATTGCGATAAAGTCACTGCCACATCGTTCTATATGAATTTTCCGTAAGAATTAGCTTTTCTCCTTATGTCTTTCATAGGTCTCCATTTTCCGTAAGAATTAGCTCTTCTCCTCATGTCTTTCATAGGTCTCCATCTTCGAACCTGCTTTTAAGAATTCAAAAAAGAGTACAAGTGAAGCACTTTAAAGATTCATCAATAAAGGTGAAGGATTATTTTTGCATGTCCTCATCAAAGTTCCAAGCCATTCCCAGAAATGACAACTATATAGATTAATCTATTAGGCATGCCAAACCCAACTGCAAGTGCATTAATGGAACTGCTATGGTGTGAATCCTTTAAATGGTGCATATTATGTACCCTACC
>MSTRG.109012.1 Scaffold4659 364050-366424
CAAGCAAATGCGTAAAAAAATAAAAATATAAACCCACTCCAAACAGCACTTAAGCGCAACAGCTTTGAGGCAGTGTATCAGTTCGGTTTACAAAATTATAAAACAGACACGATCAGTTCAGAGCCACACTTCCTACAACCCGAATGCCGAAAGCCATTACACTCTTACCACCAGTAACATAGTACAACGAGATGTGCCTCAAAACAAATCATAAATCTAAACACGCCATGTTCAACTCAGAGGGGTAGATTTTTTTTCTATTAATGAAACTAGATCACCATCATATTGCATTACTAGCAACAGGTGGAATCGACTTCTACCTGTCTTAATCTATAAAGGGAACTCTCAAATCTCAACCTAAAACATCCACCGGTTCAACTGATAGTACTTCATATGTCATCACGTTTAGCCACAAATTAACCTGGCAGAGCTACATTTTCCCAGATTAAGAGTACTATAACCCCCCCAGGTCTCTTAAACCTAGCAGAAATCTACAGATCACAACCAACAGACAGTGTCATGGCTGGCTATTGGATTTGAGCCTAAAAATATGGGATGTCAGCAAATTGCACTTAAATGAGATCATAGTAGCGGTCATATGAGAAAACCATATAATTTTGCCTGGGTCCTTAAACATGGCATAAATTTTCAGATTGCAACCATCAGATAACAGTACAATGTGCTCTGATTTGAGCCTACAAATAGGGGATGCCATGCTTTTCTCATCATCTAATGCAATAGAGCTCAAGTTACAGGATTTAACTGACTAAACACATGACGCCTAAAGATGAAATCAAGCCAAGACAACTGATGGAACCCTGAGAGAGCCCTGAGAGAGAATGTACTACTACAAAAACAGAGTAACTATTTCCCTCAAAACAAAAAACAGGCTAACTATTGTAGCTGCCAAATCAAGAAGCAAGTAACAAACTTCAGAGTTTCCACCTTATCCCAACAGAACAAAACCAGAAAAGAGGGTACGGGACAAAACATAAACATGTACCTCTTTAAATCCTTGCTAACAAACTGAAAACCCAACCAAACGTGAGAATAAAGCGCAAGGTGGAAGGCTCAGAGGGAGGTAGAACTAGAGACAACCAGATGCATGCACTTCTCCAGTACTCCCAAATAGCCAAGTCACATCCCCACCTACTGCAAAATTGCACCTTTCAGAACCAGTGTTGAACCTTAACGAAACACAAACTTGCCATATAGTCACTTAATCGCTTACCAAGCTATTCAAATAGTCATTTAAAACACCAACCTTCAGTCCCAACCCTTGACTGTTTCCATCCAGGGTCACAAATTGCAAGAAGATACAGATGAGTGGAAACAACTGGAAACAGCAGTGCCATTTTGCGTTTGGACCGGTGGGGGGTTACATAAATAGCAGGTGTGTTCTATTAGATATAAGCTTCAACAGCAAACTTCAAGCCCCTCAGAAACAAACTTGGAAAAAAATTCACTATAATGAAGAAGAAATAGGCAGCAGCTATGAAGCACGGATACTCCGAAATAGGTCACGTATGCGTATCGGATACATATCGGATACGGATACGCGCCCGATATGCGAGGATACGTATCAGATACAGGAAATGAAATATCCGATTTTTTCTTTTAATTTTTGAATTTCGGCTACGTCTCGGATACGCGAGGATACGGTCTAAATACGGTATGGATACGGTATGGATACAGCAGGGGCAAAAAAATAATTTAAAAAACTTAAAATGGGGTGAAATTGTAAAATATGAAAATAAAGATGAAATAAAACACAAAAAAAAAGAAAAATAATAAACCAAACTCTATCTTACCTAGGTATTCGACGCAGCCGCGAAGGAGGAGGAGAAGCAGCTCGCCGATCGTCGATCAGTTTCACGATCAGGTTCGTCCCTCTCTCTCCCTCACTCCCTCTGTCTGTCACGAACTCTCTCTCTCTCCCTCTCCCTTTCGATCTCGCTCGATCTGTCTGTCTAGACTCTGGTTCGAGATGTCGATCTCATCTCCCCCCCCCCTTCATCAATCTGTCTCTCCCCCTCCCTTACCTATGTCTGTTTGCATATTTATTTGTATGATTTTAGTTTTTTTTTATTTTTTATATGTAGACTCTGCAAATCACGTAAAAAAAAAAAAAAAAAAAAAAAAAAAAAAAAAAAAAAAACCTTGTATATTCGGTTTATTGAATCTGATAAAACAAACAAATAAACTTATTAATAAATAAATAAATAAAATAAGGTAAAAAAAACTTAGTAATAAATAAATAAATAAACTTATTAAAAATAAAATTTGTCAACTTATAAAATTATAAACTTTGTAAA
>MSTRG.41458.8 Scaffold19580 131953-137377
AGGGTTTGAGACACACACTCAGACACACTCAGCCTCTCACTCACACGGCGCTCTGCTCCGCTCGCTCCTCTCTCTCTCTCGCTCGCCACCACTGGTTTGGTCTCCCCCTCTCTCTTTCTCTCACCGCCGCGCCTCTCTCCTCACCGGCGATCCTCTGTCGCCACCGATCCTCCCTTACCGTCTCACCTCTGCCATTCCTCCGTCGGTCCCTCACCGCTGCTGCTTTCTCTCCCTCACCGCCGCTCCTCCGTCACCGCCGACCTCCCTCACCGTCGCTGCTCTCTCTGTTTAGGTACCTCTCTCTCTCTCTCTCTCT
>MSTRG.10955.2 Scaffold12093 11420-14383
TCTTCATGCTGCTACTGGTCGTTCTATTTTTCACTGAAATGTAAGACTCTGATTAGGTGCACTTAGCGCCCCTGTTCTATTCTAGTTAATAAAAAATTTCACTGAAAAGTAAGACTCTGATTAGGTGAGCGACTATGAGAGAGAGAGGGAGAGCAAGACTCTGTTTGGTGTTTGGTCACTCTGTTTGGTGTCTGTATCTGTGATACAGAGAAATAAAAAATTAATAATACTAAATTGTTATGTGTAGATTCTAATAGATAGACTATTGTCCAGTAAGTCCTATGATAATCAATGATATTTTTCATAAAACACTATTAAAAAAACGTTGTTAAACGTTATTTGATGATGTTCAATGAATTTCTGACACTTAAAAATTGATGCTTTTTATCTTTGTTAGGCAAATAAAATAATAATATGGTGCAAGTCAGATCACATCCTCTAACCATTGTA
>MSTRG.65917.1 Scaffold273 2663070-2665752
CTCACTTTTTAAAGACATAACAGAAATTGAAGGTTTTTCTTGAAATAAATCTTAACTAGGTAGGCTATTTTACTAATTTATAATATGGGTTTATGTTCATGGCTATGAAGCATGGGTAATTCGACAAGCATGCCATACCCGTACCGAACACTTATTATCGTATGATACTTCATATGGTACGTCTGTATATGTACTGAGTATACGAAATACGTACTCAAGCTTTTTCTTCTTGATTTTTGATGTACTCAGATGTACTTAGTATATATCCAAGTCATACTGTACCTTAGTCAAAACAATAATTTTTTCTACTATAGAGATAAAATTCCTTTCGCTAGATTTTTTTTTTATTATTTGGGTAAACTACCAATAGGTCCTAATAGTTAAACTTAATTTCTATTAAATCCTATTGAAAATAAGTCCTAAT
>MSTRG.43954.1 Scaffold2039 1836-15925
TTCCGACCTAGTTTTCAAACCGGAAGTCCCGCGCTAATTCCGTAAGTTTGCATAACTTACATTGGTTTCTCCCGGGGTGTTGGGGGTGCTCCACGTGCCTTCTCGGGACTGTTACAGGATTTGGGGGGGCCCCCAATGTCCTATTTTAAGACTTAAGTGTTTAGGAAGTGCATTTCGTGACTTAGTTTTCAAACCGAGAGTCCCATGCGAGTTCCGTAAGCTTCCACAACTCACGTTGGTCCCTTCCTAGGTGTTTGAGGTGCTCTCCAGACCTTCTCTTCACTGTCACGCGATTTTGGCCCACCGATGGACTATTTTCAAGCTTAGGTGCGAGAAAAGTGCCGTTTCGGACTTAGTTTTCAAACCGGGAGTCCTGTGCTAG
>MSTRG.58581.1 Scaffold2450 1037828-1185873
ATAACATTTTCCATTCTACTTTCTTTTCAACCTGTTCCTACATTATCTTTGGAAGCACCATCGATCTTTTACAAGCCATTTCTTACCCCAATATTTTAAATTAACTACTTGATGTGTCGTGCTCTACCAAACTTCCTTTAAGCCTTCAATCAGTGGCATATCTTTTCTCCTTGCAGCTTAATGGATTGTCTATCTAGGAATTGTCTGAATGCAATCTTGCCCTTATTCGTGACAATTGCATAACTCAAAGCCCATATTGCTTGTGTCACAGGGATGTTGAGGTTTTTTCTATTTATAGGCACCA
>MSTRG.104158.1 Scaffold4333 214360-217818
CTCAACTATAGCCATCAAGTCATAAGATCTTAGTCATCCAAGTCCGTGGTTATGATCATATACATGTACCCACAAAAACACAGAAACAAAGAAGCAAGGCAGATAAAGAAGGTAAGAGTTTCATGCTAGCTTATACAATGGCTTAATTGTCTAAAAACTGTATTAGAATGGTTCTTCAATTACCATAAGTAATTCTAAAAGGTAAAATGTTGAAAATTGCA
>MSTRG.133642.1 Scaffold6937 1585017-1585803
CAAAAAGTTACTAAATTAGCCAAAAAGTTACTAAATTAGCCAAAAAGCCAACAACACATACCAAAAAGTCAAAGACTCTCTTTTCTCTCTACTTTTTGCACATCTTTTCGTAAAATGCCAAAAAGTCATCCCAAACATACTAGTTTTTTTTAGCTCATATTTTAGCCAAATAGCCAAAAAGTTACTAAATTAACCTGTTCCCAAACGAGGCCTTACTATAAATATAAGTTCTAAGAACATTGTAAATGATTGTTGATAATTCTGATTGTTAATGATTTTGCACAGGCTATTTAGTCTTTGAAAACTTTAGGGTTCACAAGGTAAGCAACAGTAGGAGGTCTTCCCATTGTTTCTCTAAAGCTCAGCATTAAATATGAAGGTCTATTTCCAATGCAACATAGATTTTATCAGTTGTACAGTGAGCACCAAATCATTGTGCATTGCTTTGATAAAAGCCAAAGATGCCTTGGCATTTATTAGAGAACAATGTTTGACATCACAAATTTTATTGAAAC
>MSTRG.45825.1 Scaffold2099 1044209-1050740
AATAGAGGCTTATAAACATTAATCAACCACCCTCCATTTCAATTTACCAAATCAAAACATAATTTAGGGCTTTTTCTTCTTTCCACAATAACATGCTAATTTACACTCCAATTAGCCCAAAGAACTATCAATGATAAAATAATCATTCTCAAACAACCAACCCTAGGTTCCCTCACATGGTTTTTAAAGAAATTCAACATGATATGATTTTCATGCAATACAAAACTAC
>MSTRG.106681.2 Scaffold448 724369-726045
CCTTGTTCTGTTTTGGGATGCTGCCTTCTTGTTCCTGTTCCTGTTGATATGTTGGATTTCCTACCTATGATGGTTTGCCTTGCTGATTATGTGGATTCACAAATATGTAGAGTTTGGGATTACAATTTGGTTAAGCCAAATTTGAAGGTGGTGGTGGAGGGAATACAGTGAATGTGTTCTTATAGAGGCAATCTGTGGGCAGAGGTATTCAGTGAATGGAGTGAATTTTTTGATGACAGGTTTGTATACATTCTTGAGCTGATATAGAGGGTGAATTATTGAGGTAGGTGGTGAGGAAATTAATACTCAACAACCGTGGTGTGTGTAAAATAAGGCATAGTAGGTGGAATGAATTCAATGAATGGTAGGTATTGTTGAATTAATGAATGGTAGGTGGTTCAAACGTATGCAGTGTCTGTAGTAGGCCATGAATGTAGGTGGAATGCATTTATCCACTGACTACATGAATTTCTACATTATTAAATATTTTTGAACTTTGTATGTTGAATGCATTTTAACTGAGACAATAAATGAATGGCAAGATCAACATTAGTAAATGAATGGCACA
>MSTRG.38914.2 Scaffold1880 465523-476136
aaaacggagagaaagactaagtaatcgggattaagctaaacgtcgaggttttagtggtaacaatgagtgagttacagaagcagagataacttagaagtttgaagacGTATATAGACATCTCTCAACCACATCACTTGAAGCAATCTCTCTTGTTCGACGACCAATCATCTGATTTCGCATTTTAGGTAAAGACGTGGTGATCCCGCCAAGTTGAAGGCGTGGACAATTGTAAAGAGCACATGGCTTTTCTTTTGTTGTGATTTCATTTGTAAAGCCAAGGGCTAACGTGTATGGGTCCGAGAGACCACTTTTGTGTAGCCGGGCTAATGCCTTGGAAGATGTAAGCCCTTAAGGGCATTTATTTGATTTGAGATTTGATACTTCACATGCTATAGATTCATATACTCTTTTATGTTGTGAATCTATACCGCATGTGGGACTTTTGTATTAAACCCATTTATATAACATATGTGAAGATGGAAGGATTATTGTCATTGTGTAGTGAATGTTTATTAAATTGGGGAGTTCATGTTGAATTATTTTC
>MSTRG.80591.9 Scaffold3283 653051-655693
TGATCACGCCGGTTCATATTAAAACCTTCTCGCCATTTGAGACCTTTCAAAACCATGTCACTCCAGACTCTCTGAAACTTAGATCCCCTTTTCAAAACCCTCTCTCTCTCTCTCTCTCTTTCTTCACTTCAGATTCATCAATTTACAACCACCATGTTCTGAAACTCTTGGTTTCCTCGATATCGAGTTTGGACAGAAGATATTGTGAAGGCTCTTGAGGTTGAAAGCCCTCGGTCACTCTTGGTTGAATGATCTACGTTTCTCTCTCTCTCTCTCTCTCTCTCTCCCCCATCAAATCCATGAAGGTTGTCGATGATTTGAAGGTTGATTCTTGCAAATTTGAAGGTTGATTGTCCAGATTTGTGATTCTCTCTTTCGATTTTATTTAGATCTGTTCTGCTTGCATTTTGGCACTACACTTTGGCATAAAGTAACTGTTGCTGCAATTTTTATGAAGTAAATTCATTGCAGATATTTGTTGATTTTTTTTATGTGGATCGTTGGAAACAGTGAGTAGAAGCTCAACGATGAAGAGATGTAGATCTGCCCTCTCTTCGATAAGATCTGCTTTCTCTCTCTCTGATCTGCTAATATGCTTGAGATCCTCTGTAATTTGGCGATGTGGAGAAAAAAAAATGTTTGTGACTGCTAGGTTAATAACCAAACATGTGGTTGGACTTGGCCTTGGGGAGGTAATAGTGACTGCAGTGTGACTGATTTTTTTTTTTTTTTAAATTCAT
>MSTRG.67413.1 Scaffold278 1412459-1414545
AGTTCATAAGATATTCTTGTACTCCAATAAGTCCTATTATTTGAACATTTGATCTACCAAATCTTAATTCTTATATTTAAAGTATTTTATGGACTTTTTTACCCTTACAAATATTTTTTGAACGATTAGCAATTTGGTAATGTGAACATTCATATTTTACAATTTGAATATTTACATTGACGTGTGAATGTTCACATTGACGTTGTAAACATTCACGTTGACAATGTGAACGGAGCATTCATACTAAAAATGTGAATACTATTAGGGGTATTTTGGTAACTATGTCACCTATAGGACTTATTGGAATATAAGAAAATAATGTGGACTAAATAGAACATAAGTAGTTGAAAATGGATTTATGAAAAAGTGCCCCAAAAAATAACTATATTTTGTTCAACAAAAAGTCCATTCCTTTTTAGTTGTATCACTATTTGATTAGTGTGTAACGCCTGTCTACATGAACAATTGCTGCTCGTATATGCATGCACAATGTATTTGTGGGGTTCCTTTCTTTTTTTTGGGGGGGTTGGGGGGGAGGACATCTTGAACATGCAAGAGCCTAGCTGAGAGATGCAGAGGGCAGTCCTTGCAGCACCCTATGATTCACCTAACCAAACCAAGCCTTGTGTCCTAAGTAGGATCAGCTACATGAATGAGCTGACCCCACTAAAAATGCATGTAAACAGTAGGAGGGAATCGCTGATTAAAAGAAAAAAAGAGAGGAGGGAATCAGTTTCTAAAATGATCCAATTAAATCTTTGAATCAATTTCTACTATCATTTGTTCTAATAAGTTATTTGACTTGGTACTTGCTTTGCCTGCATAAAATGGTTACCCAATGTCCCAAACTTCTATTTGATTACTGCAACTTTTTTTTTTATTCTTCAGTTCAAACTTCTTTATCTAATTAGTCTACCAATTTCAATGGACTTTTTGATACATAGGGTGACATTTTGGTAAAGCAGCACAAAAACTCCTAAGAAAGTCCCATGTACGCGTGTCAAATGCTGCCATCGTGGACTAGTGTCAAACGCTGCCATCATTGGACATCTCCCGACATGTATTGCACATGCATCCAAATGTGTCCTATTATGGTTCTTAATTTTTCAAGAACCGGACACTCTTTTGACACTTGGGGAATGTATGTATCCATAGTTCTGTCACAAGTAAAATACATTGCAAGTTTGTATAAAATAACGAGAGATTAATGAGAGATGCAGAGGGCAGTCCTTGAATGAGCCTAGCTGAGAGATGCAGAGGGCAGTCCTTGCGGCACCCTATGATTCACTTAACCAAACCAAGCCTTGTGTCCTAAGTAGGATCAGCTACATGAATAAGCCGACCCCACTAAAGCCAATTAGTCACTTGTTTTGTGCAAAATTCATGTAAGCAGTAGGCGGGAATCAGTTTCTAAAATGATCCAATTAAATCCTTGAATCAGTTTCTACTCTCATTTGTTCTAATAAGTTATTTGAGTTAGTGCTCACTTTGCCTGCATAAAATGGTTACCCAAGGGCCCAAACTTCTATTTGATTACTGCAACTTTTTTATTTATTCTTTGGTTCAAGCTTCTTTATCTAATTAGTCTACCAATTTCAATGGACTTTTTGACACATAGGGTTGACATTTTGGTGCAGCACAAAAACTCCTAAGAAAGTCCCATGTACGCGTGTCAACCGCTGCCATCGTTGGACATCTCCCGACATGTATTGCACATGCATCCAATTGTGCCCTATTATGGTTCTTAATTTTTCAAGAACCGGACACTCTTTTGACACTTGGGGACGCATATAGTTCTGTCACAAGTAAAATACATTGCAAGTTTGTATAAAATAACGAGAGATTAATGACAAATCAAAACAATGTGGATATATACTTGATAAGAATTTTGAAATCGAAAATTCCCAATTTGGTTACTAATAGAGTTTTTTTAAAATAGATATTAGGACTTCTTCATTCTATTTTTTGGGATAGAATTCATGGTGAAACGCAAGCTATGAAGCACGGATACTTCAAATAGAGTGATGTATCCGTATCGGATACCGATACTCCTCAGATACTTGCGGA
>MSTRG.49333.2 Scaffold2170 752403-752794
GATAATTGGAAAAATGGCGAGGTCATCAATGCGTGTTCTATGTTTGCTTCACTGTAGTACTTCATTATCTAGATCAAAGTGTTTGGAGAGCCAATGATGGAGTCAGAATTATGGTTACCACTGGTATATTCAGAGCTCTCAAAGAAGTACATGAATTTTGTGCTGAAAGAAGGGGATTAATTACAAAATAAATTGAAAGAAGATTATTTGTTGCTACGACAATGTCCAAACCAAACCAAACCAAA
>MSTRG.59391.1 Scaffold2493 845969-1086077
ACAAGGAACACCACCAACTCCAGGTTCAGCTGCATCAGTAGTGCTGCTAGAGAGTGCATTAGTTGCACCACCAGTGGTGCTAATTGCAGAAATATTTGTGTAATTTGTAGAGTTTGAGCTTGAGGTAATTGTGACACTGGTACTGGTACTATCAAGGGAGCTTCTTGACATTATACTCCATTTTTCAATTTCTTCCTCATGAATCTCACCATCTTTGGAAATCAGAGGAAGCCTCAATTTTTGAGCTGCTTCTGCAACAACGAGCCGGTGCTCAAGCGCCTCGTAAACCTGGAATGTCTTGTCAATTTAAAACAACTAAAATCCCAAAAGAACAAGATCAGCACTGCATTCAGCAAGAAAGCAGCATTTTATTTTCAAATTCCTATTGGAGCTTAGTTTTATGCAATTTGTTTTGATAACTATATGTTTTAACGAAACCCTAATAACCAGTCTCTGTATAATCAAATACCAAGACAAGGATTCTGCTTGAGCATAGCATGTGAATCTATTATTACACACATACCTTGTAAGACAACCAAAATTCAAAATGTGATTATGTACTTCAAAACCAATTTCTTCGGATGCAAGAATATGTG
>MSTRG.108765.1 Scaffold4631 781441-782665
CACATGTATGTAAAATAAAATAAAAAAATTAATTATTTAAAAAATATAATAAATAAATAAAATAATTAATGTGTATTAAAATAAAAATATTTATTAAAAAATTAAAAAATTTGCCGTGTCCCCTGCCGTGTCCGTGTCCCTATTTTTTAGAAATTGCTGTGTCCTGTGTCCATGTCTGTGTCCGTATGCGTGTCCGTGTCCGTGCTTCATAGGGTAAGAGTTTCCATAGGCATCCTTTGTATTGTTGGTGCAATTAATAAAAGTTGAGAGTTTTCCTGTAATCTCTTGTTGCCTATTCTCTTACTTGCTATAACACTTTGTGTGTGTGTGTGTATTCATAATTGGCTGAGACTAATGTCCAACTTAGTGGCATTACAGGCTGGAAATTTGAAACAAAAAAATTGACCTTGTAACAGTAGGAGTGGTGGTGATGGTGATGGTGATGGTGATGGTGATGGCGGCGGCAATAAGGTTATAACTATGTATGTCGACCCATATGCACAAGTATTTATAAATTTAATAAAAAATTAAGTAGGTTTTCTTTCAGTTAATTTATTTGTTTATTTAATTTTTAGCCTATATTTTAAGAATCAGGGGTGCTCGTAGATCTGCTTGGGTCAGATGGCCTCCCATCTGCCATCCATGCAAACTTAGGCGGATTGAAAAAAATCAATCCGCATATGTTCGCTTAGTGAGAGGATGCAGATTGAAGAGGCCGTGTGGATTAATAGTTGGATGAGGATTAGTTTGGCGGTTTGGACTTTATTATTTTAGACCTTTTTTCAGACTATTTTCTAGTAGTTTTTTATTGTTTTGGGCCTTAATTGGGTCCAAATTTTTTTATTCTTCCTTTTTTATAATAAAAATAAAGTCCAAACTTTCATATTTCATAAATAGCTATAATTACTGGTTAATAAAAGACTATTTTTTTAAAAACGCAAAGCATAAAGTATAGCATCACCT
>MSTRG.37993.1 Scaffold1857 2871242-2871743
CTCATTTTCCCATTTCCCAAGCGGGCTGCTTTTCCACGAGGTCTCTTTTACGGAACCCTAGCCTAGCCTCTCTCTGTCTGTGTTCCAATCACTATCTTCGCCATTTTCTCTTTCTCAATTCAAGACTGCAGAGATCGTTTCGATGGCCGGTGGATCAGATGCGGCCGTATCTACCTTATCGTGTGCTCAATGTGGCAAGCCTGCTCATCTTCAGTACGTAATCATTTTTTATTTTTATTTTTATACTTTGATTAGCTTCTCGGCAACTGTATTTTGAAAAAGAATCAATTTTTCATGCTTTTTTGTTTGTTTGTTTTTTTCGCAATAATTTACACATAATATCTATATCTGAATGCTT
>MSTRG.114637.1 Scaffold507 405524-412465
TAACCATAGTCCATAGAACAACAGCTACTACTCATTCCATAGTAGACTTGTGGGTGTTTCCAAGTCAGCCATTTTAAAACATTTGGCTCAATTCAACCAAATTCTAACTCAAATTGGACCAATAGATATTGGCTAAACCAAATGGGTTATGTATAAACTGTACAACAACATGATTCCAATATATTCTAGGTGTTTTGATTTAAG
>MSTRG.107057.1 Scaffold4503 130065-130993
GCCTAGTTGAGGGAAACGTGCCCGTGCAAATGATCCCGAGCTTGAAGACACAAGTCATTTCATCCAGGTAACAAGGTTCTTTGACCTCCTCGTCCAAGGCATCAACTAAGGGGTTTCCGTCTTGAATGTGGCGCCATGCCCATTCGGCAAGGTGAGCATTCATGGTGCATGTAGCACAGTCCCCGGGCTGTTCCCACTGCAATTTGAAGCCGCTTAGGCCAGTCCAAGACAGCATGATGGACTGGACCCGAG
>MSTRG.81375.2 Scaffold3321 197355-206791
TGTAATGTGAGTAGGGAATCATTGGAATGGTTGGGCTTTCTTGATCTAAGAAAAGGGTTATCAAGATACTTCACGATGTCAATGGAATCATAAAACCATCCAGCTTTTGGTGACTGTTAAAGAGTTTGGGATGTACAGGAAATGGGAAATGGGAGATGAGGTTTTGAAGCTTGGGAACTCCACTCGGATTAATGAGCAGTGCTTAGAGCTTCAAAAGAATATCAAAGATGATGCTTCCAAAATGAAGCAATGGAACTAGCACTGTCCTTGGAGAAGTTGACAAATGAGAAACTTCTGAGCTTGCATGGTGT
>MSTRG.136845.1 Scaffold7319 8124-9585
CTAAAAGATAAATGAGGTAAAGGAATTTATGGGTATGAATTACATATTTTTCCCCTTTCCGTCTTTCACTACTTAGACATTATCTAACCTTTTTTTGGTCAATATTCAGTCATTCCAATCTAAAGTACTTTAACATTTTTTAGTTCAATCACAGTCGATGTAATTGTTCTGATGTCCTGGGGTCTGCAACTGCTACACTCTACCCCCTGTTCCTCTGATTTGCATTCCGGACTCTAAATTATGTTTTTCTTTTTTGACTGCCATTACCTCAGTCTCTTTATTCAGCTATGAGTCACTGGGAACTCATAATTTCACCTCCTTAAACCCTTAAAGGAACCCAGCCAAAACAAAAACAAAAACAAAAAAACTCTTAAAAGAAAGAAACTATTACTGGTTTTACGTGATATGGTCATGTGCCGTACAAAAGTCTTCCAAGTATGACTTTTATATTCATTTGAAAACTTGCAAAATGTGTGTTTTGTTGTTGTTGTTGAGAAATGAATGAAATCTAGGTGCTCTTCTTATTGTCATAAAAAATTTGAGGGAGAGAGAGAGAGAGAGAGAGATTGGTAACATACTTTTGTATCCGTTTCCCTTTCATTAGATTTTAAAAATAAGTATCTAACCACAAGAAAAGATATATGAACTGAAAAATCAGTATCTTGATTTCAATGTTCAAATTGCCATTTTTCATTCTTCACAGCTCTATTTTTTAATTTCTGTCTGCAAAAATTCTTTAGGAGATGAAAGAAAGAGGAGCTTGGACTGATAGCTGATCAGAAATTTACATTTGTGTCCTGGGAAGAGGTGAGGCAACAGCAGTGAGATCTCCCCCTTGGATTAGCAGCACATAGAACAGCAATAGAAGAGTGGACTAGATCTCTACATTTTTTTGGCAAAGGAAAATAATTCGACTTTGTGGTGTACAGAAAGACATCTTCGCCTCCACAGAAGTCTGGCATTGTGTTTGGTTGGTATGTTGTTAGCGTCTCTCACATTACTATTGACAAACAACTGATGCAAGCTAATGTGGGGGTGTATATGGTAATTGTAAAAGTTCAGTTGAGAGGAAGAAGATGAATGCAAAAGAGTTGCAAAATAGTGCCGAGTGTATACCCTTCTCAAATGCATTGTGTATACATGGTATCACAAATATGTTACATAAACATAAGCTGTATATTTTCACAGCTAGAGACATACATTTTTAAGGTTACATATTGAATGACAAT
>MSTRG.117131.2 Scaffold532 35083-36889
GCCTTTTATTTTGAGCAGCTTTTATAGTTTGTGACAGAGTTTTGAGTGTTCTTCAGACTTTGCATCTTTAGGAGAACTTCTCTTGAGTTTTAAATAAAAACCTTCACCCTTTGCATAGCACAGCGTTGCATCATCCTAACATCCCATGGCCTTTTGGGTGGTGAATGAAGCCATCGGAGCATGGAGATCGAGGTGAGAAGCTTCGTAGTGATCTAGCAGATCAAAGGAGGCTGACTTGGTCAAACCGAACTCGTGGAGCATGAGGAGGATTTCAGAGTTAGGTGAATTGGGGGATGGTTGTAATTTCTTTCATCTAAGTCCTGTAAACTTTTGATTTGTTTAGTGGATTGTTTGGGGTGTTGGGATCATTCTTTTTATCTCTTCGGAGAGTTTTGTCATTAGTTTTCATGTTAAATCACTGCATCTATTTATAACTTCATTGTTCTATGATTTATTTAATCACTCTTAGTCTAAAATTGAAAATTTTAATTGGCTGGTACTTTTTAAAAGCGAATTAATTTTGGGTGATTGAAGGTCTATTAACCCCCCTCTAAGCACAATATCCTCGGACTCCAATAATATTTTTAATAGGGAAAGTTGAACAATTGACAAATTTATTCCTGTATCAAATATCTTTCAGTACAAAAATGTCTGCTTGACATCTTTAAACAAATAATAGGCACACACACACACAACATCAGATCAAACAAACCCCTTTTGAACATCTGTATATTGAAATCAACAACATGTGAAACAATTGAAGAATTTCTTCCTACATCCAATATCTTTCAGTACATAAATGTCTACTTGACATCGTCAACAAATAATAGACCCAAAAAAATTAAAAAACAAAAAGAAAAAAAGAAAACAAAAACATCAAACAAAAACCTTGTGAACATCTGTATATTGAAATCAACACCATGTTACCATAAGCAGTATTTCTATTTCTTCACTCATGCTCCTTTATTCATTACCTTGCATTACTTCACAATTTTCTTTACAACCTTTTTTTAGGCCTCATCAGCCTTGTAGGTCTTTATTATGCTAGTGAGGCGGCTAAAAAATCATGCTCTGTACACCATTTCAGATTAGGTTCAAGACCTACT
>MSTRG.151293.1 Scaffold932 439383-440086
ATTGAAATAGAAAGTGAGCAGAAATCATCGGAAAATATTCCACTTTTGAAAAGTATATGTATAATAAGTTTTGAAGACTAAAATTTTACTAATATCACCGTATTATCACCTCCACAGCGTGACACCACTAATCCAACTATTAGCATTAATTACAAATTGCTTTCTGTCAAAACAAACAAAAATTAGCCAAAAACTCAATTATGTGTAGTTGCTGTCGTTGTGGATACTGGTTTCATACGGAAATTACCCAGAGATTTGATTAGCGTGTAGATTAGAGCTGCAAATTTTGGACAATTTTCTGACCAATTCTTCGGAATAAGTAGCTGTATTTTTTAATAATAGATAATTCTTCGGTCTCTCTCACGTTGTAATTCATCATAATTTGATTTGTACTTTTTATAAACCAACTCTGATCAAGACTCGGTCCTTCAAAGTTGTGTAAGAAAGGAGGCACATAACAG
>MSTRG.129836.1 Scaffold6575 795006-795839
AAACCCAAATTGCTTTTACAAACCCGAACCCTTCAATTCCTTCCTAATCACACTGCATATATATTGTTTATTTGTAAAAAAAAAATTAGAAAAAAAAAAAAATCTTTACTTGAATTGAATACATATCTATATTCTGTACGAGGACTCAGTCAGCAGCATAGAAAAACCCATATCTCCCTTTCCTTTTTCTTGTGTTTTCTTGTTATTGGTGGATCGGCTTCTGAATTCTCAGGGTTTTGTTTGGAAGAAGAGCTAGTAGATGTTGAGTTGGAGAGGTAGAAGGTGAACTGGGTCTGACTTTTTTTTATGGATAATTTATGTTGCTTCGGTTCTCAGGTGGGGATACTAAAACAATTTATGAATTTGTACTATCTTTTTTAGTTCCTGCATACTTTTTTGGTGAATTTTATGGTATGGTTGTTGAATCTCTCTCTTGAAGTTGATGATCCATTAGATTTGAAGGTGGGTTTTGTGTTTTGGAGATTAAAATTTTGGGGGATTGTCTGTTTATGGAAATTTTAATTAGGGTTTCAGTTGAAAAATGGGGAAAGTCTAAATTATGTTGGTTTGTAAGTTTAAATTGTATGGATTATCCTTCTCATAAAGAGATCTTGTGATGTCTTCTCTGGGAAGCTCTTCTGATTTGTGAAAGAAATCAATTTTCTTGAAAGGAGTTTTCTGATCTTTGCTGGATTTTGAGATTGGAACTATTGAGTGAGGGTGAG
>MSTRG.553.4 Scaffold1011 1280279-1280992
CAGGTTTTGAACAGGTTAATTTCAGATTTTGAACAGATTCTGAACAGGTTTTGAACAGGTTCTGAAGAGGTTAATTTCAGATTTTGAACAGATTCTGAATAGGTTTTGAACAGGTTCTGAAGAGGTTAATTTCAGATTTTGAACAGATTCTGAACAGAATGACAGGTTCAGAAGCAGAATCACAGGTTGATTGTTTGAAGCAGAATGACAGGTTCAGCAGAATGAAGTTCAGAATGATGCAGTCCAGAATTTAAGAATGATGCAGTCCAAAATTACATGAAGTTCAGAATGACGCAGTCCAGAATTTCATAATGA
>MSTRG.129786.1 Scaffold656 2253608-2253902
GTGAATCTTAGTAGATAAAACAAATCGAATATGGGTAATGTGTGGAAGTGGTTTGAAAATACCCTTCGGATCTTGGGAGACGCTAGGAGTCCTTAGATAGTCACCTGAAAGGAAATAAACGCTCCGACGTAGGTGCCGGAATTAGCACTCCGACGGGCAAGTCAGTCTCAAGCTCTAGGTTATTTGTATTCTAAGTTAAACAAGGAGATTCTTACCCTTCTTTTT
>MSTRG.37211.1 Scaffold1846 324917-325192
GAAATAAATGCACAAATGGATAATAAATCAACATTCTCAATTCAATTCCTCGTTTTCTTCAATTAATTATATGCATTAATTAATTTAAACCAATTAGGGCAAATTACCATAATTCACAAAACAACCCTAAGGTTCCATTTCCATCAATGTACCAACATTAATCTCATTTCTCTATGCCTAACATGCATATAGGTTTATATATTTAAAAC
>MSTRG.151698.2 Scaffold939 1281233-1282080
CAAGATTGATTATATTCTGTATATTACAATTCCTATATATAGAGGAGAAGATGGTAGTGGAGTGTGTGATAGTGGAGGTGGATGGTAGTGGAGTGTGTGATAGTGGAGGTGGATGGTAGTGGAGTGTGTGATAGTGGAGGTGGTAGGTGTGGAGAAAGATAGTGGAGGTAGTAGGTGAGTGGTAAATTCTAACAGCCCCCCGCAAACTCAAGGAGGATAGAAACTAACCAACTTGAGTTTGAAGAGAGTAACAAAACAAGAAAATACATAAAAATAAAAAAGGATAGGAGACACTGTATGGTCGTGTCAGACCGTTGGTGAAGACACTGAATGGTGGTGCCATAACGTTGGAGAGGACACGGTATGGTGGTGTCATAATGGTGTAGAGGACACTGGATGGCGGTGTCAGACCGCTGTAGAAGACAGTTTATGGGGTCATGTCGGACCGTTGTAGAAAAACAGTTTATGGGGTCATGTCGGACCGTTTGTAGAAGACAGTTTATGGGGTCATGTCGGACCGTTGTAGAAGACAGTTTATGGGGTCATGTCGGACCGTTGTAGAAACTAACCGGAATCAATGTCGGGACAGTTTACAGAGTCTTGTCGGACCCATAAAGGAGCTAACCGGAATCAATGTCGGGACAGTTTACAGAGTCGTGTCGGACCCATGAAAAAGCTAACCGGTATCAAATGCCGGGACAGGTTATAGAGTCTTGTCGGACCCTTGGAAAAGTGGCACCCTCAAAAGGTGTGCCCAATTTTGTCAAAAGGCGTGCCATCAAAAGGCGTGCCCAATTCATCAAAAGATGTGCC
>MSTRG.11852.1 Scaffold1236 591517-591931
GCCCATGTCATATGTCCATTACTGTTTCGGATTAGCTACCCCCACCTCCGGGTTTCATCTTTCAAAGTGTAGGTGGCCAGAAGGACTTTCTGAATCTCAGAACAATGGAATACTTCAAATAGTTTCTCCATTTCAAGTAACCATGTTTCTGCTTTTAACGGCTCAACGCCACCCAAAAGGTCGACAGTTTCATTTTCAGAAACTTCTAAGTTAAATTTGTGAGATCATTG
>MSTRG.22170.2 Scaffold1492 3491342-3492632
agaagttccctcttttgtgttccgggtcaaacgtcgtctcctttttctttaggtctgtaagtttctcggattacaacggttcctcctacgacttcgtcaccttggtttcctcttttaagtcagtctaaattgtgttaccaggtttaagtttctcggattacaacggttgttcttatggtttcgtccctttgacttgctcttttaaggacgtcgacgttgcttgtccattgcagaggatagtataaaaagtaatataaaaccaaggagttcacgacgttaaaaggtaagttaaaaagtaagtatacaagttgggtaaatgtcaacgaaaaacgaccaaatcaaacatgataattgaaggt
>MSTRG.138062.1 Scaffold747 1713553-1713997
GCCTATATTCTAACGTCATCCTTATATGTAAAGAGTGGGTGCTTAGCACATTACTCTAGTAAACCGAGTGCCATTATTTTTAGGAACACTGAGAGTGTCATCTTTGGCCTTATTTTCCTGTAAACAAAGAACACAACTTTCAAGAACAAGTGCGAATGGAGCAATAACGAGAGTGGCAACAGCATGACGATAGACAACGAGTATAAAATTGCTCATTCCACGCTTCAAAGAAA
>MSTRG.35016.3 Scaffold1797 256398-257344
AATTGTAAGAAAGGTTCAACAAGTAATATGAATAGCTCGATCGCTTCTACTTTTCTCTCATCATTCCATTGAACTAACATGTGTGATATTTTGTAGACCTCAACCACCTCAAGTTGAATTATTCTTTCCCCAATGAAGATGTAATCAGGTTCGTGCTGAAATACAAACAATGCGACTGCTACATACTCCTTAACTATGAACCGAACTACCGGTACTCTACACCGCTTAAGAGTAAAGTTTTGATTTTTTTTTTCTGAACCCCCTCCTTCTCCAGACCCAACTCTACCAGAAATCCCCTTGATCCGCTTGATTGATGAAAAAGACATGGCCAAACGTAGAGGTATAAAAAACTGGATAATCACTTCCTCCAAAGATAAAGCAATCACTTCCACCACTCCACCAGCTCAAATCACATAGCAAACTACTAGAATTGTGCTAGTCTTGGCTTCCCCAGGTTAGCATGAAATCCCACCATGCTTCAAAGAGGGCGCGCGCCTCTGATCCATCTATTGAATTAACTACCGAGCTAAGCACCAAGCAACCGGTCGAGCAGGCCATTCCTGCCCCAGCTTGGAAACCATCATTGACCCACCGGGGAAAAATTATCATAACTGCGGACTCCATTGCTGAGGACAATGAGCATTTGCTTGGATACAATTTTTCAAAAGCCTTTCTCATGACTGCTGACATGAAGAAGTGCAACCATTATCTTGATACGTAGCTTATCAAATTCACGATCAAGTCCATAGCCAAGGCCATCCAAAAATCCCATGTCGCTATGGAGTGGCTGGTTAAAGCAAAACAAAGTCTGAAGGACAACACCAACTATGCTGCTGTCATCGAAACTGAGG
>MSTRG.90350.1 Scaffold3690 3446171-3446546
GTTCACAGTCGTGAACTATGACGAGCTTCGCATTCCCGCGTTTCATCCTTCGATTTGGGGTTTCTTCCAAGCCCTCTTCAACCAACGCCAGAAACCATGGTTTCTTCATCTTCTCCACCAACAAAAGAAGATACAGTACATCTAAACCCTTATTGTCTCAACAGTCAAGTGAAGCAGAGTTACTGGTGGTGGTTGGCGGTGGAGCAGCTGGAATTTATGGAGCAATTAGGGCTAAAACCATTGCACCA
>MSTRG.152850.2 Scaffold958 671526-678750
TCATTCCTTCCCTAGACCAAACCGTATGAGAGAGGGAGAGTAGGAGAAAAATGTTGAATTCACCTAGATTTTGCTTGAACTTAGGAGATTTGAAGGATAATTGCAAAATTGAACTAACCTACTTGGAATTCAAGACCTAAGGTGAGGAATTCGTCCTCTCAATTGTGAATTTAAGTTATTTCTTGCATGGTCCATGCTAAATTAGTGTTTAGATTCAAGAATTGGGTTAAAGTGTTGAGTTAAGAGTGATTTCATGCATGCATGTACATATTCTTG
>MSTRG.95407.2 Scaffold395 1435936-1439472
CTTCAGAGTACCTCGCAGAAAGATTACCCTATATTCCTTGCTCTTCTGGTGTTTCATTGTGCGTTTGTTGCGGTTGGCTTAGCTGCAGTTGTGTAGGTACATGTGCTGTATCTCCATTGCAATTTGTCCTCCATGATCGAGCCATGGGTTGATATTCGATCATCGATTCTGGGGTTTCTACTTTGATATTCAGCACTGATACTGATCACTACTAGTATGAAATCCTTGACGATTTTTCTCCCTAGGGTTTAGGTCGAATCCCAGAATCAACGTCATCGTGGAAGGAGAGTCTCCGTGATCTCATATGAAGTGGAGAGTTCTAGGGCTTCTTAGCGCTTCACCATTCATAGACGCCATGGCTCCTCAATTTTCGGGGTAAATCTCTTTCTAAATATATATGTATGTTTATTTATTGCCTGATTCAGTTGATTATTTAGGGAAAATCCATTGTAGTGTTTGGTAGAGTTTTAGAATTATGATTTGATAATAGAGTTGTATTTTGAGTTTGTGAGTTTTGGAATTATGATTTGAGTGTGGAAAATTTATTTGGTTATAAATTTTGAAAAGAGTTTTAAATTGAGTTTGAATTGAGT
>MSTRG.91802.2 Scaffold3756 334334-336668
TTCAGTTCATGGTGAGTTGAATTATGACCAAATATTAATTGGTCATTGCCAGACATGATAATAATAATAATGATGGTGGTGATGTTTGATTTACCCAAAGGTTTTGTTTGGGATTTGTAGGAAACACCCATAGATATTAAGCCTTCAATCATTGAAGGAGAAAATTTCTACGGAAACCTGGATAATCCTGTATGATAATTTATTTATTTATTTTGGTTCATTACAATGAAATTGTCATCAATGAATAGACAAGGTTGTAGTTTGTTACCTGATCTGTGGTATATGCAGGGAATGCCTGATGATCCTTCCAA
>MSTRG.150934.5 Scaffold922 777857-806197
CACAAAAACATATCAGAATTTCAGTCCCAAAGCAAAAACCGTTCAACTCCTTGATTACAATTTGTGCCCTAGGCTATCAACACTTGTTTGCGAAGTATATCAGAGCCTTCGTTCATCCTCCACCGCGGCGTGGCGTGTTGACGACGTCAAGCTACAGCGCCATTGTGATTTGAAGGCCGGTAGAATTCCAAAACAATCTTGTGTAACCCCCATTTTTTTACAACCTTGCTTTTTGTTGATAAGGAGTCATGCCTCGTTCTTTTGGTGGTGGAGGAAAATCTTCTTCAGCTTCTTCTGGTTCAAACATGCATGAGCTGAACTCCAACCAGTTACGATGCCCAACACTGTGAAAAAATTCGCAGAAGGATGACATCTTGTCTTGAAATGCCTTAGCGAGGATGAAAATAATAGATTTTGTCAATTCTATATCAACAATTGTCCCCAATTTAAGTAGGCTCTCCTAAATGTCGTGCTGCTGTTCTCCTTGCCACTACTTCGTGAATGTCCCGAGCACACCGAAGTTTATATATAAGTTATGCCTCAGATCAGAGACTATTATGTATGGATGGAGTAATTATCTAGTTAGAACAATGCTTCAATTTAAGTAATTTTGCAAGTTAAAGTTTGTTGTCGTATATTTATACATACATATATATATCAGAGATGTTTGCAAC
>MSTRG.152247.1 Scaffold946 451376-454920
CCTTCCTACTACCCCCCTATAATTTACCCTACCCTACCAATATTTTCCCAAACAATTTTTTATTAAAATCAGGTTGGGACAACAAATACAATCGAGTCGTAATTTTCCCTCCCTACTCATACCATTTGGGCGATCCTAACATACACTAACAAACAAGGAATGAAAAAAACAAAAAGAAAACAAAAAAAATCAATTAAAGGTCACAAAAGGTAGAAATTAAATTGCAAGTATATATATACACATGAATGCAGATATGTGTCTCTGAATTGGCTTTCTTATTTATCAAAAAAACAGAAGAAGGTATGTATGTGTATGTGAATGCTTGTGTGTGTGAAAATGGATCAAAGATTGATTTGAAAATGAAGGAATTACCAAGGATATTGGAGGAGTGAGAGAAGATGGGGCCAAGAAT
>MSTRG.129889.1 Scaffold6577 212230-213215
GTGAAGTTGGTAAAGTATTAACTTGACATGGCTTACTTGACACAAAAGCATCTCTATATGCCCTCTCATTACACAAGCATCAACTTTAGGCCCGCTTATTTCAGACATAATAAAATGTAAAGCTAAGGAGAAGTACCAATGAAGCATGGAGATGAGGACAGGGCAACTGATTAACTGATCTATGTAGCTGCTCTTTGTGACAATTTTTTGGGATAGTGAGAAGATTAGAGGTTTAAGATTTGAGTCGATGAAGCAATTGTGCCCCTATTATTGTAAGAAAAATACTTGAGAGCACTAAATGGGGATCACTAAAGGAAGCACTAATGATGTGGCAGTGGGTCCCGTCCACTTTCTATGCCTTGTTTTTATTTTTTTATTATTTTTTTTGCCATTCCCAATGTATTAGTGCTATTAGTGATGTATTTTTTAGTGGTCTAAATCATTATTGTTATTGTAATATAACTTACTAACTCTCTAACCAAACCCAAAAAATAAATAAAAATGGCGTTCAGATAACAAGCAAGAAAGGCACAACTGAATTTCAGTCATGACCTTGTTATGGTTATATTTCATGGAAAAAAAAAGGTATGCGAGAACTCAAACCTACCTCTACCACAGTTTCACAATTTTATCCTAGATTTTGCTTCTTTCTTCTTTTTTTAACCGTGTTTTCGGGTCAATTTGTACACACATCGACTGACGGGATGCCCTTTCTCTTTCAGCATATGGTTGTCAAG
>MSTRG.45442.1 Scaffold2078 1882548-1884077
AAGAAGAAGAAAAAGAAGTGATTAATTAGTAAATGAAACAGAGTTACCTTATGAAAAAAACAGAGATCTTCGGCCATTAAAAAACGAGAGAAGAAAAGGGTTTTTTGTGCAGAGCTCAGATTTTTGTTGTGTTCATTCATCCCCTTTTTTGTTGCACATTCAGCTGCCGACTTCTCAAGCATGGACATTATATGTATATATACATATAAAATATGTATGTATGTGTATAGAAGTCTCAGCCAAACATCGTGAAGAACAAAGCCATGAATAATCTTTTGTACTAGTTCTTCAATAGAGACTAAGAGCCAACCTCTCTCTCGTCTTGCTGGTCTCTTTCAGATCCTAAATTATTGTAGTGCAAATAGTATAAGAAATACCTACCGTGAACATAGTATTGGAATATATAGACCACCAAACGCAAAGACCAACTGAGCTCTCTCTCTCT
>MSTRG.76832.1 Scaffold3114 1301425-1301925
CAACAACGCAAATTGGGACTTTCTTAGATCTCAAGCACTTCTTCTCAGCAATCCCATCCAAATCAAAGCACCCAGAATTCGTCTTAATCTCCTCCTGTTGCTTCTTATCCCTTAAAACTTCTGGCAATTCAATCAAAACACGCTTAGATTCAACATCTTCAATCCCAACTAGCCGAAATGGTATTGTCCGAGATCTCAAGCACTTTTTGCCCAACACACCCAAATCACAGCTCCCAAAAGCGCT
>MSTRG.147172.1 Scaffold872 617574-625988
AGAAGAGGGAATTGTGTTATTCCTTGGAGAATGAATCGAAATAAAAGTATTTATATTCATCTTGTGAAATTGGCATATCAATTCATTTGATTACATTAAACTTTGAAAGTTGATTTGAAAACTTGCATTGAGAAAAGAATGTTGAGAAACAAGTTTTCATGGAATGGTTTTGGGTAAATACGTTGGTAAGTCTTGATAGGTGGTGTAGATGATATTGAATAAGTTGGCCTGAGAGTCTAGGGTGAAAGACCGAAAACCTGCGCGGATAGGTGTCGAGCCTTCCGGTTAATACCGGTAAAAATGACAATTCGGTAGTACTTGTATAGTCTATTTGCAGACACCAACCTAGGGATTACCAGAGTCGTATTTACCGCCTTTGAAATAAATTGTTAAGTTTTGAACAATTGAAATTGCATGACATCATTGAGCATAATGGTTTTCAAAAGATGAAAATGTGATTTACTTTCAAAAAGGGGCGTAGCATGACATGTGCATTTCATCTCTTGAGACTTGTATAAAATGTATATACTTTGTTAAGGATTTCCTACTGGGCATTATGCTCACCCTACGGGATTTTTGTGCAGGAAAAGATGTGGTGATCCCGCCTAACTAAAGGCGATGAAATATGTGTTAAGAGTACAAGGCTCTCATTTTGCTATAACTCTGTTTGTAAGCCAAGGGCTGTATTTGTGTGGGTTTGAATAACCATTTTGTTTAACCATGCTTAAGCCTTGGAAACTTATAAACCTTTGGGCGTATCTATTTGTTTATGTTATTTTGATTTGAAGTGAATGTATTATCGCCTGAAGACTATTTGTATCATGTAATACAAGTTTGG
>MSTRG.18380.6 Scaffold140 797202-799656
ACTCTTAACTTCAGAGATGAATGGGATAGAGCACAGCTTCGAAACTTGAGAGAGAGAGAGAGAGAGAGAGAGAGAGCAGAGCTTCGAAACAAACTTCGGATGAGTGAAGATCAGAGGGAGAGAGCTTCGGATCATCCTCTTCAGATCAGCTTCGGATCAGCATCTCCTCCTCTTCCACTTCATCTTCGGATCAATGATCATCCACTTCATCTTCGGATCAATGATCATCCCCCATCTTCTCTCATCCGAAGCTCTCTCTCTCTCTCTCTCTTCAACCCTTTTCAACCCTCAGCTTCAACCCTTTTCGATCTGAAGAAAAATATCTGGTATGAAATTTGGATCGATCTGAAGAAAAATACCTCGAAAAATTATTTTGGGATTATTTGAGATTAATGGAAGCCGTAGCCCCCATTTCATACCATCTTCGGATCAATGGAAGCCGTAGCCCCCATCAAATCCAGGTATTTTTCTTTGGATTATTTGAGATTATAATGGATTATTTTGATTCTGAAATTATTTGTAATATTGATGAATTCTGAAATTTGGTATGAAATTTGGTATTTTTCTTTGGATTTTTGGTATGAAATTATTTATGAATTCTGAAATTTTGATATGAATTCTGAAATTTTGATATGGAAAGGTGAACCAGGGGCTTCCTGAAATTATTTATGAATTCTGGTATGAATTTGATGAATTTGATGAAATTTTTTAAATCTGTTTTTGGTATTGAATTTGATGAATTTGCTGAATATTGATGAATTCTGGAATATTGATGAATTCTTGTTCATTCTTGTTCAATATTTTTATATAAAACTTCATTCATTCTGGAAAATCCCAACTGAAAGGGAAGGAGGGAAGAAAGAAAAAACAGTTTAATTTGGGTGACTTGGCAGATTTGGCAGCTGCCAAAGTAGCTGCCAAGTTTGCCAAATTTGGCAGCTGTTATAGCATGCCATTGGAGAAGCCTAAGATTGCCCAAGTTGCTATATTATGGCTTTGGTAGCTGATTTAGCCATCCATGATAAAAAATTTACATGCCATTGCCATTCAAACTTTTTTATCCAATTAGAAATTAAAGTATATGTATTTTATTAAATTTGGCTCAATGTTTGGTGGAAATGTGGAAAATTAGTTTAACTAGAGGTAGGTATAGAGGGGGTAAAGATAATTTGTCTAAAAGTTAAGTTTTTTGTTCCAAAAACTTAAAATATTTGTAATGTGGTAAACTTAAAATATTTGTAATTGAAGCAGCTAACCCTCCTTGACTAGCACGATATTATCTGTTTTGGAGTTAGGCGAAAACCAACAGTTAACCCCTCACAACTTTAAAAGGCCGGCACCAAATGAAATAGTTAACTCTCCCCGCTTAGCACGATATTGTTCGTTTTGGAGTTAGGCGAAAACTAGCAATTAACCCTCACGGCTTTAAAAGGCCTCATATTAATATAAGAGAGTTAGTTATTCCAGTTATGTAGTGGAGCTGTGATGGAGTTAGTTAGTCTACTTATGTAGTAGAGCTGTGATTTCTCACAGAGAGCCTGAGCATGGCGTTCCCACAGACGGTGCCAAATGAATCAACTAACCCTTCTCGCACCAAATGAATCAGCTAACCCTCCCCGACTAGCATGATATTGTCCGCTTTAAAGTTAGGTGAAAACTAGCAACTAAGGCCCCGTTTGTTTTCAGATGTAGAATGAAGGGGATTCATAGTGAGGGGATTAATAGTGAGGAGATTGTTAGTTAGGGGATTCATAGTGAGGGGATTAAGTAAAATTATATTTGTTTTGATGATAGTTGTTAGTATAGGAATTGTTAAATTATTTTTATATAAAATAATAAAACAAATAAAAAAATATAAAAAATTAAACATTAATATTTTTAAAAAAATTCCCAATATATAAAAAATAAAAAAATAAAAAAATTTCTAATCCCCTCACTATTTTTCTAATACCATCTCTACCTCTTCTTTCCCAATCCCCCTTTCAAGGCCTTTACTAATACCAAGGGATTAGGAGTCCCCTCACCATCTCCCTTCCCAATCCCCTTCCAAGGCCTTTACTAATACCAAGGGATTAGGAGTCCCCTCCCCATCTCTCAAAACCAACACCTCATATAGTAGTCTCACCTCACTATCAATCCCAATCCCCTCCCTATAACCCCAAACAAACGGGGTTCTCACGACTTTAAAAGGCCTCATACTAGTCTAAGGGAGTTAGTCCACTTATGTAGTGGAGTTATGATTTCTCACAGAGCGATATGGGATAGTGCACAAGATTACATTTTTGGATCTATAGCATGCTTGGTTATCATTTTTTAAAAACACTTTTCAGAAAATTTTACTTTCTTATTTTTCATTTTTTTTTGTTTTTACTGAATTTTTTTAATATTTTGAGCAATATTTTTTTTATTTTTAGACATACCTAAC
>MSTRG.32725.1 Scaffold1759 473433-473753
TGCTCTAAATAGTTTGTTAAGGGTGTTTTAAGCTTTGGGGTTGTTTGACCCCTCTTAAGGCTTGTTTGGCCTTTGTTTTGTGCCATTTTGGTTGAGCTCCAGGACCATTGTGTTTGGACCTCCTCACCACTGAAATCTTGAGGGATTTCAGAGGTGAGGATGGTGCCTTGGGGTCCTAGGAAGGAGAGGGCCACCCCCTCTCCTTGTTGTCCTTGAAAAGGGCCATTTT
>MSTRG.134695.1 Scaffold708 2220196-2221309
TTTTAACAGCCCCCCGCAAACTCAAGGGGGATAGGAACTAACCAACTTGAGTTTGGAGAGAGTAACAAAACAGGAAAATACATAAAAATAAAAGAAGATAGGAGACACTGTATGGTCGTGTCAGACCATTGGTGAAGACACTGGATGGTGGTGTCATAACGTTGTAGAGGACACTGTATGGTGGTGTCATAACGTTGTAGAGGACACTGTATGGTGGTGTCATAACGGTGTAGAGGACACTGGATGGCGGTGTCAGACCGATGTAGAAGACAGTTTATGGGGTCATATC
>MSTRG.36393.1 Scaffold1824 589561-591701
CATTACATAAAATTTGGTTAAGAAGAATAAAAGTTATCATGATATAATCCCCAATCATCAGTCCTTTATTTTTAGGTAATTCATGAATGCAAATTTGGATGTGCCTACTATCAAATTTTTACATCAAAATCATAATCAAATCAGATCAAAGGCACCAGTCTCAAATTAGCATTTTCTCTCCTTTCACCCATTTGATTTTATTCCATCTGGAGTCACTGTACAAAGTGGAAACGGGAGCAGGGGCAGGGGAGGGACCAGAATGGGGACGGCCGAGCAAGGGCCCTATAGAAGAGTTTAAAGTTGGGAGTTGGGGCGGGAGTGATGCCCCATAGGAGTTTCCTGCTACTAAGATCTAGACCATTTGATTGGCGCTCCCAATCATAAGCGTTCTAATTTTTCTCTAGTGAGACCATGTTAGAAGTTTAGGTGGGTCAATTGAAAAAAGAGCTCATCATGAACTCAAATCAAATTAGATCAAAGCCACCAGTTACAAATTATCTTTTTCTCTCCTTCGATCCATATGATTTTATTTGATCTAAGACCATCTGATTGGCATGCCCATCCATGAGTATCATCATATTTTCATACGTGAGACCGTGTTAGTGAGAAGTGTAGGTGGATCAATAAAAAAGAGAGCTTGTGATAAGAACCATGAACCTGACCTCATAGTAGACCTAGTCATATATAAATTCAAATGTGTGGTGTTTTATTCTGACTTGGTGATTTTAAAAAAATTGAACCTTTTCAAGAGACATTGAACCCATCTAAAATCCCTTAAAGAATTCAAGAAAGCTAAATCATGCAACCATAAAATAAAGGGACTTTGAAGAGGTCTTCTGAAGGGTGGTTCATAGGTCTGTCTTTCCTTTTGCTAAATTACATGATATCAATATTTATATATATAATAACTACACAAATATAGAATCTATTGCTCCAAATAAAAATAAAAGAACATGCACGTGTATCTAACAGTTTCCTAATTGTTGTTTTCTTAAACATTTTCTATGCTAGCCTGTGATGAATGATGAGACTGCAGTTTTGGAAATGAATATAATATCTAAACCACAATGGCCCAATCTAAATCCAATTTCATTTGATATCGAAGCTAACCTAGTGTCTAAGTTGAACTAAAACAACACAGTGATAAGATCCTTTACATGGCTGATTCAAAGTTG
>MSTRG.120283.2 Scaffold5623 30443-39549
TCCAAGCTTAAGCGTTAGAAAAGTGTATTTTCTGACCTAGTTTTCAAATCGAGAGTCCCGCACCTGGTCTTTAAGTTTTCACAACTCAAATTGGTCCCTCCCGAGATGTTCGAGGTGTTTCCCGGGCCTTCTAGTGATTGTTACACGATTTCGGCCCGCCGAGCCCTATTGTCAAGCTTAAGAAAATTATTTTGATTGTGAAGTTTAGGGATATTGATATGAATTTTAAATAAAAATTATAATATAAAAAATAAAATTACAGTGTAAGAAATTATAAGAGGCCCCATTTACATTTTTTTCTTTGGGCCTCGAATAAGCGTGAGCCGCCTTTAGTTGTACTTTTTGTGAAGATTGAGTGCGATAGCTTTATTTTGCGGTCATCTGGGATGACTTTTTGGTCAAATATGGATTTTGTAAGTTGTTATGGAAATGAAAGGTGGTTTTTTTGTTTTTGTTTTCTTCTTTAACTGTATAGACAGTGTA
>MSTRG.35802.1 Scaffold1815 394400-398067
GTCACAACTACAATTTGATTCAACAAATCTCTCTTCAACAAAACTTAACTTGTGACCTCAGCCATATCCAGATCATGTTTTCTATTGTGACTGACTCTACCTCGTAGAAACAGTAATATACATATATATATTTTTTTAAATACATTCAAAGCCGTAGCATAGCTGTAGGGGAGGGGACACTTGCTTGTGGCATGAATTTAACTATCAGCTCCTGATGAGGTGTAAAGATTATGACCAAGTTACTAGAAGAATCAAAACCAAAACCATTTTTGTGGTATATCTTAGTTACATCATCTACATGAAAGACGCTAAAAATGCTTTTACTTTAAGATTCACATTCAACTATTATTACACCAGCAAAACCCAAAACTTGAAAAGTTCAATTACAAGGTATATATAGAGAGGCCAATATCACCACAACTCAAACAAGAAGAGTAACAAACAAAAAATACAATGAAGAGAAAGAAGCCGCTTTACATCGTGAAAACTAATGCAGGTTTGAATGAAGGGCGCATTGCTGCCAATAGCTTACACTGGTCTCATTTGACTCGGAATTCTGCTGCAATCAGAGCCTTCAAAAGAACTTGGCTTTGATCACCCAAGGTCCCACAGTAACTGTTCACCTATCTCACCATTGCTTGCCATGTCACTACTTATCAGATTTCTCACAGCTTGCGTACTTCATTCACATTGCACCACGAAAATATTAGCCCAAGTTAATTGCATACAAATCACTTTATGTATATTCACTCTCTTAGAACAGGTCTCAATGTATCAAAATTAACTCTTCAATAGCATAATGATAATTTCATATAAGGAATATATAAGGTACTGGGGCAGCATGGGCATCATCCAAGGGTGGACTGTCA
>MSTRG.12053.1 Scaffold12447 120555-124657
CCTCTCTTCAGCCTAGATCCTTATCTCGGCTGAAGAGTACTCAAAGTTGGTTTTTCCTGCCAACCTATCTTCAGCCTAAATCCTTATCTCGGCTAAAGGGTACTCAAAGTTGGTTATTCCTGCTAACCTTCTTCTGTTGCTCCTAGCTAATACTGTCTAAGAACAAATTTACAATGGAAAGAGAAACTACTTGTTTTACAATGGGAAGATTTATGCTGAAAGAGAAACTACTTGTTTTATTAGGGAAAGAAAAATTACAAGTATTTAAAGGAAAACTAAAAATAAAATAGTTTGAGATTGGCAGTGTTCCATGGCCTAGcatgttggaacaacagaggtagaaggttcactatacggg
>MSTRG.121737.4 Scaffold573 471408-487291
CCATGCGAGTTCCGTTAGTTTCAGTAACTCACGTTAGTCCCTCCCTTGGTGTTTGAGGTGTTCCCCGGACCTTCTCTTGACTTTCACACGATTTTGGCCCCCCGATGGACTATTTTCAAGCTTAGGTGCGAGAAAAGAGCCGTTTCGGACTTAGTTTTCAAACCGGGAGTCCCGTACTAGTTCCGTAAGTTTTCACAACTTACATTGGTCCCTCCCGGGGTGTTTGACGTGTTCCCGGGCTTTCTCGTGACTGTTACACGATTTTGGCCCCAGACAGCTTAATTTCGCGCTTAAGTGAGAAAAAAGTGCATTTTTTGATTTAGTTCTCAAACCGAGATTCCCGTGCTAGTTCCGTACCGCAACTTACTTTGGACCTTCCCGAGGTGTTTGGGGCATTTTCCGGTCCTTCTCGTGACTATTACACAGTTTTGGCCCCCCTCCGGTGTTCTATTTCCAAGCTTAAGTGTGGAAAAAGTGTCTCTTTACAACTTAGTTTTCAAACCTGGAGTCCCCATGCTAGTGCTGTAAGTTTTCACAACTCGCGTTGGTCACTCCCAAGGTGTTTTGAGGTGTTTCCAGCCCATCTTGCCACTGTTACATAACTTTAGCCCCCCGATGGCCTTCTTCCAAGCTTAAATGTTAGAAAAGTGTATTTTCCGACCTAGTTTTCAAACCGGGAGTCCCATGCGAGTTTCGTTCGTTTCCGCAATTCACGTTGGTCCCTCCCTAAGTGTTTGAGGTGTTCCCCGGACCTTCTCTTGACTATCACACGATTTTAGCCCTCCGATGGACTATTTTCAAGGTTAGATGCGAGAAAAGTGCCGTTTCGGACTTAGTTTTCAAACCGGGAGTCCCGTGCTAGTTCTGTAAGTTTTCACAACTTACATTGGTCCCTCCCGGGGTGTTTGACGTGCTTCCCAGGCTTTCTTGTGACTGTTACACGATTTTGGCCCCAGACGGCTTAATTTCGCGCTTAAGTGAGAAAAAAGTGCATTTTTTGATTTAGTTCTCAAATCGAGATTCCCGTGCTAGTTCCGTAAGTCTCCGCAACTTACTTTGGACCTTCCCGAGGTGTTTGGGGCAATTCCCGGTCCTTCTCGTGACTGTTACACAGTTTTGGCCCCCCCCGGTGTTCTATTTCCAAGCTTAAGTGTGGAAAAAGTGTCTCTTTCCAACTTAGTTTTCAAACCTTGAGTCCCCATGCTAGTGCTGTAAGTTTTCACAACTCGCGTTGGTCACTCCCAAGGTGTTTGAGGTGTTTCCGGCCCATCTTGCCACTGTTACATGACTTTAGCCCCCCAATAGCCTACTTCCAAGCTTAAATGTTAGAAAAGTGTATTTTCCGACCTAGTTTTCAAACCGGGAGTCCCATGCGAGTTCCATTCGTTTCCGCAATTCACGTTGGTCCCTCCCTAGGTGTTTGAGGTGTTCCCCGAACCTTCTCTTGACTATCACACAATTTTAGCCCCCCGATGGACTATTTTCAAGCTTCGGTGCGACAAAAGTGCCGTTTCGGACTTAGTTTTCAAACCGGGAGTCCCGTGCTAGTTCCGTAAGTTTTCACAACTTACATTGGTCCCTCCGGGGTGTTTGACGTGTTCCCTGGGCTTTCTCGTGACTGTTACACGATTTTGGCCCCC
>MSTRG.3009.1 Scaffold10592 100655-102773
ACAGCCCCAAATTCCTATAAAGCCCTCCAATTGCAATCCCTCATTAATTTCAGACACAATATTTGTAGGAGTGTGTTTTCTGCATGCATCCTACATCGATCCTCTCACTGGTAATATGATTTTTAAGAAATGATGGACAGAACAACTCCATAACATGTTAAATGTGGCTTCCCTCCCGTAGCAAAGGGGGATATAGTGAGCTATATTAAAGAGTTGTATCTTCACAATGAATTCTCTTTATCAAATGCTCTATGATTTTTGTGGCCCCTCTGTTCTTGAAAAAATGCAAAG
>MSTRG.12486.1 Scaffold12502 726091-726872
GCACGGGAGGCACAACAAGTACAACTCAATCATTTGAACGACGTGGGGTCACGACTCACAACCCTCTTGGAGGGTTCAGATGGTCATCCTACTATTCGGTAAGCAAAATTTTGTTTGACAAGCTAGTTCAACTTCTACAAAAAATATGGATCATGTTGACATAGAATTGTTTTCTAAAGTTGCTATGCAAATAATTTTTGGTTATGTGCTTCGAATAGGTTTGGAGGCATAAAGTGAGTAGACTTTGCAGCAGCCGACGTGGTGTTTTGATACATTACACAAAGGACC
>MSTRG.11946.1 Scaffold12414 42562-49238
GCGGTGGAGTCGGCGTCGATGGATGGCTGTGATTTCGGAGATCCAGGAGTCAACGAAGAAGGGAGACCGAGTGACGAGTGTGTGGATTAGATCGGTGAAAAAGGTTACGTCGTAGAGGTTGTGGGTGTCTTCCGGTAACTGGTGGTCGACAATGCCGATATTTGTGACTACTGCTGCCATTGATGGGTTTGATTGAGAGAGAGAGACAGACAGAGAGAGAGAGAG
>MSTRG.12977.1 Scaffold1268 1609261-1611710
GCCTCAATAAAAGAAAAGGAAAAAAAATTGAAATGTACTTCACATATCACTATGTTTCTGCTTTCTTTGAAGAAAGCTAAATGAAAAATTAATCATTTAATTGATGATAGAAATTTCCACACTAATTAATCTAATTTTCTAGATATCAACAGCCGCTTATTTTAATATTAAGAATGTGTGTTGAACTGCATATTTAGCTATTGCATCAGCCTTAATACAAAGTACAACTCATTTTGAAGGCTATTTTGGGGGAGAATCGTGAAATCATATGAGCCAGCAGTCTCCAATGTATATGGGGAACACAAATTAGGAAAGTAACAGCTTGCTCTTCATCTCATCTCTGGAGTGATAATAGTAGCAGTGAGCTCGGTGCTATGCATCAGGGTCCCCGGATTTTGCACCCACAACCCAACCCTGTTTGCAATCTGCAAAAACAAATATAAATGACGTTGATTTTGGAAGATTATAGAAAGCACCATGTTCAAATCTAAAAGAGCACAACATAGGTAGCACAAAGAATGAACTTCAACAACCAAACCATTGGGGAGGATGAAATTTGTTCTTGCACTTCCAAATACTAGACAAGTCCAATTGCACTACCTCTCTGGTGATAGAAGCTAATTCAATTTTACCACAGGCAGTTTATGGATTACAAGTAACCAAATAAAATGGATTTTATGCCATCCAGTAGACAAAAATCTTCACAAAAAGTGCTCAGAAGCCAAGCGTAACGATATTTCATTGAAGAAACCACACAAAGTGGTCTTTCTTACATGTTAGCTGCTCATCACTGCAAGAAGTTGCTTAAATATGTTATCAAAGCATGATCCCCTAAATAAGGGTGATATTCACGAGGGTTCATCTAACTAATTAGTTCTGATGAATGTTCAAAACAAAATCAAAGAGGAATTTATTTTTGTTGTGTACAAACTTTCTAGAACAAAATGCAAAAAAAAATTGAACCAAAACACAAACTTAGTCCCCAAGTTTTTGCAAAGATGAGTCCTCATCATCCACTGAGAAGGATTGACCAATCTATACGGCGATGAAAACAAAGTAGCAAACAATTTCAGCTCAAGATGGATGTTGAATAAAGTAATCAACCAAAATAAAAAATTCTAAGAAGCAAATCCACAAAAGTCTCACTTGAATAGAACGAGGTAAAGCAATTTTGCTACTTTAAATTTGAAGGAAACCCTATAGAAGAAGCAGCACCTCCAATCGTGATAAGTAGCTATTTTTATAGGCACCATGCAAAAGGTGGCTTGTTATTGTATTGAGAAAACAAAACCCCCGTGTCTGACTGAGTGCCCATGTCTAACAAATAAACAAGAAAAAAATGTCAACTTCAAAAGATAGCTTCTACATTGCTCATTGGCTTATTCAACATAGAAAATAGAGATCATAAGAACTCAAGAGAAAAACATCTTTTTTCCTCATGTTTGATTTATAAGTTAGGTGAGAAATGATGACAAATGGAGAAGACAATCCTACTATTTATAAGTTTTATTTCTCACCAAATGCAGTGAAATTTGGTTAGAAACAAACTAATTAGTTGCGATATCAGCAATAAAATCATATATCAACCAATATCAAAAGCTCAAAATCTCAATACATAATGAACAATGCAATAATATTTTATAATTTATTTTTGATAATACCAAGATTGCCCATTAAAATATAACCACAACCCAATATCCATTCTTTGTTTTCTTACTTACCCAAATCATCCAAACATGATTGTGTTAGGATATAAAAGGGAAAATGTGTAAAAAGGAAGTAATTTAACCATGTTATTGTATCATGAAACAAGAGTGAGTATTTCATGGATCTTCAACTGGTAAATGAATCTTGGCTCCATGCGGCAGTCAGGTCACTATTGGATCAGTGCCAGCTGCTGACTCGTATTTAGAGCCATCATTAACTTTTATCAATCCACAATCACTAATATACCCTAACCCTAAATTAAAAAAGACATCTTTCTTTCAGTTCCACTTTCATTTACTATGATTCACTATTTCATGTATGAGTATGATAAAATAAATGAAAATTTGAATTTGAAAATTACTGAATCCTCACAAAGCAACCATTTTTTTTTAAATACCTTCTAGCATTTTAACAAAATCTGAGTAGGAAAGCTCAGAGATTCAGAGGTGTTCCAGCAAAATCATTATTTTGGCGCATCCAAAGAAGACCTATAGGATTATAAAACAAACAAAA
>MSTRG.120538.1 Scaffold5658 138787-140160
TGGCCTTTTAGCTGATTAAACTGTCTCCAATTTTCAGTTTGTTCAATGCTATGTTGCAAACTTGCTGACTGTTAAAATTTACTACAGGCTACCATTTGAATATCTCAGGATTCTACCATTCCAACATTTCTAACGGTGAGTTCACAGCCATTTAAATCCCACAATTTAACTATTTTGGTGGTGAAGTTACAAATTGTTTGTTCCCATTGAAATTTTACTCCGTGATCTGGTTTATAAGCTCTCTTGTGAATTTAAGTGAGTCTTATTTTTCATAATTCTGCTGGTTCATGGGTGAAATCTGTACCAGGCTCTGTAGAGGCTGTTACTCAACGTTCTGCAAGCTTTTGCTTTGGTAGACCTTTTCGGAACAGTTCATTTCAGCTTTGGATCATTGTTTTCTTCCTATCTTGCAGTATATTTTTAATTTCACTAAGCTCTGCCAGCATTTTTAATTTCCTTTCAGTCTCTTTAATTTCTGTTGTGTGCAATTATTTTGGATCGTCATGTTTATGCTTCAAAATCTGTTATACTCGCTAGAACATGTAAATACAATGGGGATTGTAACATTTGTCAAAACCGATTTGTCAAAACCGATGGATGGGAATAAGAATTCACAAATAACCTTGGCAGGCACATAACTTGTCATATGATATTATGAATAGTTAAGTCTTGCCATCTCAATTAAGCATCCACAATCTCATGAAAGCACCCAAAATCACAAACAAAAGTCGCTCACACACACTGGAAACATTTTAAGAAAATTTATCTGTCACCGGTGTAAAATCATTCTCAACTGCAGGGAAATCAAAGGGTACTGCATCAATACAAACAGTAGAAAACCACAAGACAGCAGAGGAAGAAAAGGATCAGAATAATTTCTTGGGCAGATTATGACTCATCAGCAACTTCTTGGACTTTGAGATTCTCATTTACAGGTTCCTTGTCGTGGTCGCCTTCGAGCTGGCTCAAATTGCCTTTCTCCCTTATCAGTTGGGTGTGGTGGTGTTTACAATAAAGTC
>MSTRG.143784.1 Scaffold824 74492-81401
AGAGAGGAATTTTTGGGTGTGGTGTAAAAGGAAAATAGGTGTAAGGAATTTATTTAGGTGGTGTTTGGGGAGGCAGATTAAGGCTAAATTAGCCACATCACGACAAAGCCTCCTTACACGGGTTTGAGACAACCCTTCTTCGGGCAGATTAACGGATATACCCTGGTTATTCCTCTCATTCATTTCGCCCAACACCAAAGGTAAACCCAGAACATAACCGTCCTAGGGAATTTCGAAAAGAATGAGGCGATTTGCTTGAACCAGCGGCAGCGACGACATCTGGTTCCAACTTCTTACAGGCGATCGAGCTGGAGTAGCCATCTGCGGCGGCGAAGATGACTCGTGAACCCTCTCAAACACCACCGATCTTGAGGGAAGCAAAATCGGGAAATTCAAGAACGGTTCCAACATTCGGG
>MSTRG.121993.11 Scaffold5767 622130-637543
TGAGATTATTCTATATATCTATCTATAGAGGAGGGTTTTTGCTTTCTCTCTCTTCACTCTTCCAGAGCCTCTCACTTTTTCCACCCAAGCCCCTCTCTCAATTCCAGAGGTTTCAACCTCATTCTCAACCGAGCAGCCACTACCTCAGCCATTAGGAGCCCCCTTCGTCTCACCACCACTGCAGCCCCTCCCTCTTCAAGTCTAATCACCATTGTTGTTGTGTGGAGGAGCGATTTTGGGGGGAAATTTCTTTATTTTGGTCTCATGTTTATTTTATTTTATTTTTTCCTTTTTTCTGATTTAACTGCAGTATGATGGGTGTGGTGTGATTTTGGCACAATCAGGTGGATTGGCCCCTCTTCTCTCTCCTCTTATTATATAACAGGTAAGCCATTCATATGACAATGGATGATTCACATCTTAGGTTGTTTTGTTTTGTTTCGTTTTATTTATTTATTTTCCATCCCCCAAACCAATCTTACCAATCTGTTAACAGTCCTTTTTTGTGAACATGATTGTATTATGATTTAAAAAAAAAAAAAAAAAACCAACCAGAGCAGAAATTGTTTGATCAAACAAGTGAAAAATTGTTGTAGTTGATTTTCATTATTATGATTGTAATTCATTAGATTTCATTACAAGAAATAGTGTAACGTATATTGTGTTTTTGATTTTTAGTATGTGTTGTATTTGATTGGGTTTGTGTATAGTGATTGGATATTTAAAATCTTGAAATTCTATTAACAGTCCATTTTTGTGAACATGATTGTATTATGGCTTTAGAAAGAAAAAAAAAAAAA
>MSTRG.34865.2 Scaffold1792 832301-833016
TCTGAATGAACAGAAACTAGATATGTCCATTTATCATCCTCATCTATGAATATTGTTTCATTAGCCTTTGTGATTTATGGTTTTTCTGATAGGATTTGTGAATAATGGAAATATGTCCAGGATAACCTCTTTCATAGGAAGGAAAATTAATGTTTAACAAACCTCTGCTAGTGATAGATTGAGATCGTCCGTGATGGCCGACTGAGTAGGTTCCAAATGCATAAGAACCACACACTGCGACAAAGGTACTAAGGTAAACCATCCATTCATGCTCTGTAGAACTGCTTTTGTGGCTCACATCTTTGGGACCATAGCCATCTTCTTCATCAGCTCGAGTCTTGTCTTCTGGTATAAGTGGCTCCCTTATCTCTTCTTGCAAGCTGTTCTCACCTTGCTCCAAAAATTAGAGAATTCAAATTTATGGTCAAGAATTTAGTGGAGAATTCTAACAAAAGGTAGGCCTTTCAACTCAATTTTTTCATTCTATACTCATGCTTCCCTAATGTGACAGAAAGCAGATTGGGCAAATTTCAT
>MSTRG.126343.22 Scaffold619 527836-528416
AAATGTATAAAATGTATCAATGGCTGAGATGATTCCTATATACTATCTAACGGTTGAGATCATTTTTATCCCCGCCCAAACACTCTCTGATGTCTCTCTCTCTTCTCCTACGTCTGCCCAAACACCTCTTCAACTCCCACGTCTGCCCAAACACCACCTCTTCAACTCCCATGCTCTCTCCTCAACTTCGTCTATGGTGGATCTCTCTCTCACGTTCGAAATTCTCTCTCTTCTGAAACTCATGACCAGAGGTAGCAGATCAGAGAAACTGAAGATAATCTTCCAACAGCGACGGTGGTCTCAACAGGGAAGAAATACCCTCGCCATTGATCAACATCAAGCTCCGCGATTGTCCACCTTCCCTCGGCTCCCACCCTCTCAACATTAGAGACGGTGGTCTCGCCATTGATCAACATCAAGCTCCGTGACTGTCCACCCTCCCTTAGCTCCCATCTTCCCTCGACTCCC
>MSTRG.150730.20 Scaffold920 411729-416604
TCGACCTAGTTTTCAAACCGCAAGTCCCACTCTAGTTCCGTAAGATTCCATAACTTAAATTGGTTTCTCCCGAGGTGTTGGAGGTGTTCCACGGGCCTTCTCGGAACTGTTACAGGATTTTTTTTTCTCCCGATGGCCTATTTTCAAACTTAAGTGCTTAGGAAGTGCGTTTTGTGACTTAGTTTCCAGACCGGGAGTCCCATGCGAGTTCCGTAAGTTTCCACAACTCACGTTGGTCCCTCCGTAGGTGTTTGAGGTGTTCCCCGGACGTTCTCTTGGCTGTCACCCGATTTTGGCCCCCCGATGGACTATTTTCAAGCTTAGGTGCGAGAAAAGCACCGTTTCGGACTTAGTTTTCAAACCGGGAGTCCCGTGCTAGTTCCGTAAGTTTTCAAAACTTACATCGGTCGCTCCCGGGGTGCTTGACGTGTTCCCTAGGCCTTCTCGTGACTGTTACACGATTTTGGCCC
>MSTRG.5526.1 Scaffold1104 2737181-2738441
CTTCTGTCTATGACAAGGAATTTGTAAACTATGTAATTCCAAATTAGTTTTTTTTGAGTGAATAAATTCCAAATTATTTGGTATGTCCAAGAAGGAAAGTCGAGTTTGGGACAATATATTAAGGAAAGAAAATACCGCTACTTGGAATACTCCTCATGTATTGATGAAATTTCTGTAGTTATCTGGTTTGAGTCTCATTGTCCTTGGTTCCCATACCATTTTCCCCCAAAAGCATCTTTCCCAATTGTTGAGGCTATCTGCATGGATTTCACCGATTGTTTTGAAGACATTCCTTTATATATGATCAAATTAGCTATTAATTCTAAGGAACTTGAAGTTGATGTAAGAAATCTTAGGCAAGCTATTTAGATGATTCTATTTTTTCAGGAGGAAGAACTCCTGAAAAGTTTCTCAATTTAATGCAGGGTTCTATATCTCCAAACAAGAGAGTTGGATATCATAATACCTCAAAAACATCTAGACCCTGATACTAGTGATGATTCAACAACATTTCATCCTAGTGTTTTGCATGACAATGACAGAAATGACCCAGTTTGTGAATAATCAAGTGGAGTCTGGTTTCATCAAGTAGTCGACAAAAATATTGGGAAGTGGCTAACTTATGTAAACAACTAATAAATAGAAAAAAAACAAAAGAAAGGGTGAATGAAAGACGTTCACTATTGGACGTGTATCTTTTCTCATTATGTTTAAAGGTTTCTTTTGTAACAAAGAAGGG
>MSTRG.43039.10 Scaffold2 477894-512074
CTCTCTACCTCCATCGGAGCCCATGTTGTGGGGATACCCAACCCCAGTAGCAATTCGTTTCTTCTTCCTCCCTTGCTCTGATTCAATCAATGCTCTTTCATTCTCTCTCTTCAATTCCTTGTCAGAGCCAAACCCTTGTCGAAGACTAACCCCGAACCCCCTATTACCCTCTTCATTTTCTCTCTTCCTCATTTCCTCTCTTTGCCATACCAATCTTCATCAACAGTGGTAGCCCAAACCCCCTATTCCACCACAATCGACATAACCTTTTCAGCCATAGGGGAGATTTTGAAAGGAGCCATTGCAAAAGGGGAAATTTCACTGGACCACCATTGTCTCCAAAGAGATCGGTACTTCGTCATTGTTAATATTCAAAGAGATCCCAAACAGCCTTTGAGGAGCTGTCTTGTTTTTCAATCTGAATTTGAAGAATCACGCAGGGGGTGGGAAAAGCATACAATGAATTGAAACAAGGAGAGCCAGCAATTGAACGCTTGTTTGATTTGACCAGGTTCCAATCTAAGTGAACAAGCCGAACGCTGTTTTGGAAACAACATCCCGATGTCTAAGAACAATTGGAGAAGCTATGGGAAGATACATTGTCTGGCGCTCGATTCATGTATATGTTACAATCTTATTTATTT
>MSTRG.31578.2 Scaffold1723 6570-7216
GCTGGAATGATTGGCAGGAGGAGTGCTAGGCCCCGGTTATCGCCCTCAGCGATGTCGGCAATTTGTTGGGGGTGATGGGTTAGAGATGGTGAGGCCTTTTGGGAGGTTTTGGATGGAGAGGAGGGAGGTGCAAGTGGTGGTGGTGGGTAGTTTTGTTGTTGGCTTAGATGGGTTGTGGGTTTTAGGGGTGGTGAAGCACTTGGCATTGAGCATGGCCATCGTTGCTATAGTTGCTGCCATTGGTGTCGTGTGTTCTTGTTGAGCTTAGTTTTAGCTTATTCTGTAGGTGGGATTGGAAGGCTTGTGAGATGAGAGAAAAGCTTAGGAGAGAGAATAGCTTCAAGGGTTGGCTGTGATGGAAAAATGCGATCCAATAGAATTGTGATATGTGGATTGCTTCTCTTATCCAAAGTGCTATTGGTGAGATATGGACCTCATATTTCATCCCCTAACAAAGCTTCTTATCACTTCATCACCACTTAGTATTTTTATCCCTCTCCCAATTAAGCAACGAATTCTCAATATTACTTATTTGTCTTCAAGGATTTCCTAGAGACCACTTCAATAGACAAACTTTTA
>MSTRG.4078.1 Scaffold1079 805958-813170
GGCGTTCTCACGGGCAAGTCTCTTGCTCTCCTCCACTGATAAATTTTTCCACATGCATTTCTCATCATCCGTCAACTGTATAACAAGAGGAACCTTAAAAGCATCTTGCAAATATCTGCAGCAATGTTACGCTATTTGTAAGATGAACCAGATGAAAATGAATTGATTCAAAAAAGAAGAAAACAACAAACCCACCCACACTAATCATAAATTAATGTCTAATGCATACAAATTCCTAACATAATCTGACCACTAGAGGCAGTCAATACAGAGTACAAAGGCTATTTTCCAACAGGTTCCAAAACCACTCAAATTGATCACACTAAAGATAAAACTAATGGGCATTACCGTAGAAAATTTCCTGCAAGAAAAAGCTTGACCTAAGCACTAGCTGATATACCTGAAAGATTGCCACTCGAAAACGCTACTTGATCAAGAGAGACAGCAGACAAACATACAGAGACTCAGAAATTAAATTATGCACAATAGTAACTAGCACTTTAAAGGTAATAAGTATTCTGGAAAAGTGCAGTGCAGCACTTTAATACATAGAATGAAGCATGCCATATATACTATATACATAAAATACAAGTACAACATTTATTTGTCAAAAATCACGAGGGCTCTGTTTGAATAGAAAGAAAAAAAAAAGGAAGTAAAAATGAAAGGAAGTGAAGTGATAATTAAAAATATATTTTCTTGCAAGCATTTGATTAGGATAAAAATTTTGCAAGAAAAAAGATTACAAATTTTAACTTTCCTTGTAGTTTCCATCAGTTTGATGCTAAACAAACTCACAAGAAGTTTCATTTTTTGATTCTTTATGCTTCAATTTCCACCCCTTACCTCCCAAACAAACTCAACCTAGAGAGAACATACCAACCATCACATGCCAGCTTTGCAGAATGAGCAACGGTCCAGTGTGGCAGTAGTTCAGCACTCAAACTAGTCTGCCAAAACACATCG
>MSTRG.35729.2 Scaffold1814 399891-406474
TGTTTGGAGCAGAAAGAGCAAAGCATGTCTCCGTCATTTTACACTCTTCCTCTCTTTGGCGGGGATGATGACCTAGACGACAGTGAGATCGCCAGCTTTATTAACAGTGAGACCCATTACCACTTCTATTTCGAATCAAAACCCATGGAAGATGAGGTCCAAGAAAGATCTTGACCGAAGATCTGCATCATCATGGCTTTAGGATCCCGATTGAAGATGGGGTACAAGGAAGATCTCCCTTGAAGATGAACTCTTCCGACAGTTTCACCAACAGAATCGCACGAGATATATTAGCAGAGTTACACAGGAGAGAGAAAGAAGCAAATATTAAACCTGATCCTGATATTGAAATCTTCATGAATGTAACAAACGAGTGCTACCAACTTTGAAGAATTTCCTAACAAATGATGTTTTGTGTTGATACTAGTTGTTTTCATAAACGATTGTATGAGTTCTCTTCTTATAACTTGAATGATAATAATAACATAGATAAAGCAAGAAATGTTTGAATTTGAATTCACTGGGTTCTGTTAAAAATGGAGTTTATAGTGTGCAGTTTCATCTTTATGTGAATTTTATGTTCCAAAATTATTAGTGTAGTTAAGGTGTTCTCTTCAACATTCAGACGCATTTCTGTTTTTAGATTCTTTTAAGTCCCCTTGGATTGAAGATTTTGTTGAAAACATGGGATCACTAAACTTCTGAATGTGGTGTTTATGCATGAAGTTAAGCTGTAGAAAAAGTATTGCGGTTTGAAAACCAAGTAGAAAAATGCATTTTTTCAATACTTAGGCTTAAAAATAGGTCATCGGGTGTCAAAATCATGAAACACCAATGAGAAGGCTATAAGAACACCCCGAACATCTCAAGAGGAACCAATGTAACTTGTGGAACTAGCACAAGACTCCCAGTTTGAAAATTAAGTAGAAAAATGCACTTTTCCAACACTTAGGCTTGAAAATAGGCCATTGGCG
>MSTRG.154583.1 Scaffold981 260541-307305
GGTAAAGATAAGACTCTTAGAGAGTTTATCCTAATCCCACTGGGAGTCCCAGATTAGCAGTAATCCTAAGTCCATTAGGGCCAGGCTCCTATTGGGACTAGGATTATATTGGCTATAAAAGAGAGGCACCCCCATGGGTCTATGGTATGCTTTTGATACTCAAGCTTGTGAGTTTAGTACTTGATTTATCTTTGAGAGATATACTGACTTGAT
>MSTRG.16668.1 Scaffold1354 83417-128070
GCCTTATTGAAGACTTGAACGGAAATTTCAAATTAAATAATGATCGTTGAGTTCCTGCTGCCCCAAAATTTCTAAACATAGCTAACAATTAGTCAGAGAGACAGACTTCAGCAATTATAATCTATCATTTGGCTAAGAATCCACACAACACACACAAAGTGGTCTGTTTGGATCCTGACAAGTTTTTAGGGAAAATAAGGGAAATGATATGAATTATTTTAACAAACTTTTTCAACAGTTGGAAATGATTTCACCATTTGTCGTCTGAATCCAATGCAACGGAAGTATTTAGTTTAGCTAAGAACCTGAGGTGATATTCTTTCTTCGAAAATGCAAAAGCATAAGGATTTGACATAAAGCTATATTTTTCTGCTCATTCCCCTTTGTTTCTCAGCAACCAAACAGAGCACACATCACATTAACACCGTGTTTGGATTGAGTGATTTGGAGAGAAAAGAAAAGAAACCAATCTCTCTTAATCTTAATCACTTGTTCGGATTAGTACACAGGAGATAAATAAGGAGAAATAAAAGAAAAGAAATTGAAAGATTACTAATTTTGTCTATTACCAACATTGCCCATCTAACTACAAAAGAAATAAAAACATAAAAGTTTATTTTGGTAACAAGATGCGAGAGAAATCACAATCATTTCTTTCCTTTTCTCCTCTCCTAAATGTCCAAACAGTGTGAAGTGTCCAAAAAATGAGTAAAGAGAGCATTTAAACAAGATATTCAGTGAAAGGGTGCTCACAAAGCCTTCAAAGCTGTGAGATAGCAAGCATGTGTCATTGACACTCTCAAGCCTCGCCTCCAGACTGTGATAAATTATTTTTTACAAAAAAAAAAACATAAATTACAATAGTTATTCCAATTGAGCAAGTTGAAGGATTAACAAACACATCTTTGGCACAGAAGACAAGCAATCTGAAAATAGAAGCTTTTTTAATTCGAAATACCTTTGGCTGATGAACAAATTAGGGTTTTCACTGGTTATAACACAGCTTCTGAAGCCATGAACAACTACAGTCAATTCTCACTACACCAACGCCATGAAAGCGAGGTTTGGGAGGAGAACAAGTTCGCCGGAGAAGATGATTGCCGCCGGTGAAATTCTCGTCGGATTAAGATTCAGAT
>MSTRG.114708.1 Scaffold507 1252587-1260045
GTGTATTTTCAACAAACTACTCTTTAATATTTTTCAAAATACAACTTCTGAAAATGAAACAAAACATTCTATTGAACAAGAACTGACTGGAAGACATATTAGCTTGATCATCCTGGTAGTTAAACATGCCAATCCCTATTCTTGGACGTTACACCATATTCTTAGAAGTTTTTAGTATTCTTTCAACCATAATGGAGGTTTGATAATATTAAAAATTTGGCACTGAATTTGTTTGCTG
>MSTRG.114226.1 Scaffold502 1833138-1840207
CTTGAATTCAACAATATAATTAAGGTTGAATCCAACAAAATGATTTAAACAGAGCATTTCCCTTTAGACTTCAGTTTCACATTCTGCAGTCATACTGCCATGCAACTAATATTCATTTATTTTCTGCATCAAAGATTTCATTTTTTTCTTTTAATCAAAACCACCTTTCTATTATTTGGTATCTAAATTTTACAAGGATGAAAATGTGAAAAAACATTAGCTCATGTCTTAGATGTTAAAATAACATTTAGTGTGATAATGTGCTATTGTGTGGCTTGGGATAAATGTTGGAGCATGTGTGAAGGTAAAGTCTCACATCAGATAAAGAGTAAAAGAGATAAGTCTTAATATATATTAGATGGGCTCTCCACTTATAGACTTGAGCTTTTAAGTGGGTACGAGTTCTAAAAAATGTATGTTGGGTCTTGATATGATATTTGTGGACTTTAAAGTTTCTCCATAATGCATTGGGCCGATATTGTTGTGCGCTTGTGGGCTCCCCGATTCCCTAACAACAATAAGTGATAAATGTCTCTTCTTCAAAATAAGTACTCCCTCCGTCCCAAAATAATGGTCCCTTTTGGGGAATCTAACTTTTTTTGGTAGTACAATTATTGCATTTGAAAAAAGTTGATTTTCCGAAATTACCCTTTTGATAGTATATTTTTTGAGAATATCAATGTCATAATTGTACTTTTTATATTGTTTCTT
>MSTRG.100987.2 Scaffold42 1438199-1439642
CCATTGCATTTTGTGGTAGGGCAGCTCAAGCTGATAATGATTGTACTGAAATGGGGTTGTTGAAGTTGGAACACAAAAGAAGGAAGTGTGATGTTATATGCATTCTCCATTGCAGCTATATATAGCCAATATGGATAAACTTCAAGGTTGAAGTTGGAATACAAAAGGAGGAAGTGATGTTATATACATTCTCTATTGCAGCTATATAGAGCCTACATGGATGAACTTCAAGTAAGTTTTGGTCATCTCTAATTTTTTTATTATTTATTTTTTATTATTTCTGACATACTTGTGGGGTTGGTTGTAGTGACCATTTTTGTTAAAATTAAGTATGTTGATTAATACATTAGTCACAAAATTCCTTTACGATAAAGTGAGATTGTTGAGTTCCCTCTACGACACTGCTGAGTTTGGCATCTGTTGTTGAATCTACTCGGACAGGATTATGTACGACTCGGGATTGTTTAGCTAGGTGAAAGCTTACATATGAGGTTTTGTAGACTAAGTTGCAAATTTATTAACATGTTCTTAGAATAACATGTTAGTCCCTGTCTCTGAGCTTGGCCTTGCTGATGTAGTTTGTCATTTATTGAAACTTCAGATGACAGCTGATCTTAACTGTTGACCTTCCAATGTATAAAAAATGATAATATAGTAATCAAAATGATGAAACATTTTAAATGTTCGAGAATCTTACTTTGTGTTAGCCTTCTTGTGAAGCCAACATTTACCTCTCCACTGTATTTTAATGTGAGAAAATGGAATTATATCTAGTCTTTGGAATGAAATTTATTGAATGG
>MSTRG.104436.1 Scaffold435 1567510-1571713
TGTGTGTGTATTTCCACCTTTTTAAAATCTTGCATAATTATTTTTTAAAATTCTATCATCACTCTTAACTTTTAAATTCATAATCACCCTGTATTGTGTGGTGCCAACAGATTTTGTCTTCCTGTGAAGGTCACCCATAACATAACCATAACAAACACTGATAGAAAGAGAAACAGTGATGAAGTTGTTGCCTTTTTTAGTGCATTATTATGGGACTTAAATCTTAGAATGACC
>MSTRG.5601.1 Scaffold11064 49275-50267
TGTCCCCCACGTATCATGCCCTACATGTTTTGAAAATTTACGCGTCGACATGTTCATATCATGTCATGTGTTCATGTCCGTGCTTCTTAGCAATTAACATCCAACTTCAATTGGCAAATTAGTTAAGGAAATATAAAGGTTTTGACTTTTCATTTTTTGAGGCTCCGTTTGGTTTCAGCTAAAAAAGCCAATTTTGGGTCAACTTCTACTTATAACTTATTAGGCAGAAATAACTTAAATAAGCTGAAAAAAAATGATTATTTAGAAATTGGGGAAGGGGTGCTAACTTCTGCTTTCTGATTATCTACTTTTAGCTAAAAAAAAGCTTCACCAAACAAATAAAACATTTTGGTTGTTTGGTTTCAGCTTGTTTAGCT
>MSTRG.113874.1 Scaffold5 2385776-2386964
GGTAATAGATATTATTATTTTGATAAAATATTAATTTTTTTTAAGAATATTTATATATATTGTATATATAATTGTATAATTAAAGTTTTAATTGTAACTTTAGTCTCATACGCAAATATGAATTTATAATTTTTTTGGCTCATTAAAGCTCGTGAACAAGCTCGAGTTCGAGTCAAGTCTAAGCCAACTTGGCTCGAGCTTGGTTTATTAAATTTTTATTGAGCTCGACCTCGAGCTTGAGTTCATTAAAATCTTAACAAGCCCAAACATATTAAAGTTCGTCTCGGCTCGACTCGTTCGCAGTCTTAATGCTATACTGAGCTTTTCAATGTAGTGCTGCTGGACTCTGGGATCATGGGTGTGGCTTGGTGGCTAGAGATAGAGAGGTGTTGCTCAGTTTGTCAATCTGTGAGTGAACACTATATTTGGTCAAGACCATTTGAGAGAGAGAGAGAGAGAGAGCACCATGAAACCTTTTGTGTGTGGATGCTGGGGATCGATATAAATCTTTTTAACTGATTGATACGGTGTGATACACATGAGCTGGTATATATCCTAATTGAGGAAAATTTGGTTATGGATCATATTAGGAGGTAAATTGTACTCTTTTGCACCACAAGAGTTTAGAGAGGTTATCCCATACCCTAAGGGTCCAAGCTCTGTCCTAACTTAGTGCTATACGAATACATATGCTGTTCATCTGCCTCTCTTGATCTCTCTCTCTCACACAATTGGCAATTGGAGGGATTGCTGTGTCTCATACTAGGACATTCCTTTTGGTTCCCGGTGTATGGTGTATGTGTCAAGTGTCAAGTGCTCCACATAGGCTATAGGCTAGAATCACAAACGTGTTTTGTTAATTTCTTATTAAGAGAAGCTTTACTGTGACAAGGGATTTTATGAGATATGGCCAAGTGGGGGTACTGCTACTACATTCTGTAAATGGAATGGAAACCATGCATGATGCGTGCATATTGTGTCTGTTTGTATGTCTGTCTCGAGTTTGCTCGTGTAATGTTGCTCTCTC
>MSTRG.44127.1 Scaffold204 339406-343996
ATTGTTTTAAATACGTACCATTTGAAAAAGTGATCTCGTATGTATATTTACTCAAATTATTCCAATTCAAGCAATTAGCCTTCATCTACAGACATTCAAATAGGTATATCATTTAAGCATTTAGCCTCATGAAAAATATGCTTGGTATAGCAACACAAACATTTAATGTAAGATGCTAAAGTAATAAATGCTCAAGTACTCCAAGGCAAGCCAAACAAGGCAAGGCAAAATAATTAGAAAATATGCATGTTCCTAAACAATGCAATGTGACTAATGCAACGCACATATGTGTACAATTTTGATAGGCTCGGCTATGAGCATGGTATATGACCCAATTCAAGGCATGCGATAAATCACGTTTTCAAGCAATAAATTTGAAATTGACATTGGTTAGTATGATGATCCGAACCCAAATGCATGTGATACGAGTGTATGCAAGCATGAGAATGCTAAGTAAACATGATGCTCTATACTACCATCATAAGTGGAGAAATAAAAGGGAGAAAGAAATGAGGGTTGGAAGACGTACAACATTATTACATATTTGTCCTTGTGCAAGAGGGTCCGAATCGATGTCCGAATGTTCGAAATAAACTATTTATTACAAATTTGAATGAATGAATTAAATAATTAGCTAGCTAAGTTATTTATAACAAGGGTGTTAGAATGGGCAACAAGCTAGTAATCTAAGTTAACTAGCTATGTAACTACAACAATAATGAGAGCATTAATTTACAATTTACAAAGGAAGCACAAGGATGGCATGCACATAACGGTTCTAGAAGCAACTCTTCCTGCCTTCCTTGGAATCTGCCCTGTTTCACCTTCAGCCACTGCCCTCTGTTTCTGCAAAAACACACTATGTACCAAACATTGAAGGCCGACCAGCCCCCAATGAGGCCCGACCGGGCCCAAATAAGGCCGACCGTGGCCCAATTTTGTGTAAAACCTTATTTTGGTGCTTTGAGGTGAAAATAGTGCAGGTAGAGTTTTCTGAATTCTGTTTGTCCCTCTTACACTTCTCTGTCATGGAAAGCCTCAAGAGAAAGACGAAGTCGTTTCCAAAACCATCAATGAGTAAGTTGCTTGCTTGATGATTTCGGCCACGAATTTGACAAAAATCAATGAATGCAATGAATAACAATCACCCTTCCCTCTTATCATGGAGTGAACTCAAAAGGAAAGTAGAGACGTTTCAAGGGATGTCAAAACACCATGAATTGATGTGTGACGACTCTTGACACAATGGACTCGGCATAACGTCCGAACTTGAGCAACCTTATTCATTTTCTCTATGTTATTAGTCTTGTCTATTTTTTAATCCATTTGTCCAAAGTAATGATTAAGTCCGCTAAATGAGAAGAACGTCAAGCGAGAGGAACTCCTAAATATGAAGAAGAGACCATGCCGTTGACGATGAACCTCCGTAGAGATTAAGCCATTGAGCATAGGTCTCTAGCTTATATTTTGAATATCCATCGATCGGTTGAAATAACTCTCAAACAAGAGAAGAAAAGAAGAAATGGGAGAAGGTTGCAGACAAGATTGCGAGATCGATTATTAAAATGAAACTCTTGACATGAAAGCCAAACAAAGAAGCTCCATGGACAATACAACACAACAAATAAGATATGAGGACTTACAATACAAGCAAATATTGAAAACATAAACTAATTTACTAAATTAGGACAGTCCTAAATAGTCCCAAAACATAAAAAACACAGTGGCTAAAAGTGTGTTAAAAGCACACAAAAAGATAAACAAAAGCAAGGAGACGCAAACTAGTAAACCAAGACAAGGAGAGGTGGCCAACCCTTCACTTTTTGAAACTTTAAATCATGTTTTCCAACCCTTTTTAACCTCTGAAAATCAGTTTGTGAGCTAAAGAAAAGAGTGTAGAAACAAGGGCTTGAGCTATGAAATAAGGTGCAAGAGAAGGTGTTAACCTTCTCTACCCTTTGGTAACTATCCAAACCCAAGTTTACACACTTGAAATGGACTCAAGATAGCACAAAGGTATAGGAAATAAATAGCAAGAGATAGAAAAAGAAGTAAAAGAGAAGGTGGTAAGTTTATACCTCTAAAACAAAGCAAGCTCTTATTTGTAACACAAACTTGGTTCAAGCACACTCTCAAGCTTGAATTGTGATGCACAAGCCTCAACCAAGGCTCTAAGGTTATGATCTAAGGTGGTATATGGTGTATAGATATTAGTCAAGAGAGATAGGCTTGCTCAAAGGTGACTTGTATAGGAAGAAGGAGCTTTCTCTTGTGTGTATAAGCCGTTTAAAAATTGTTCAACCCTCAAAACAGAGGTATAATCTCATTTTTATAGAATTTGAGCAAAACAAATCGAAAATATCTTCAAAAATGGACAACTGGCGAGCTCTTGCCCAGAATAGAGTTTATCGCCAGCAAGGCATAGCCGGGCCCAAATAGCCACGGCCTCTCAATGGGGTACGACCAGGCCCTAATGTGTTGCCCTATTCCCCTGTTTCAAGTTTAGTGTAAGGGGACACAATGCTAAAAAATGAACCTCTGAGGTAAGTAAGAAGGTTTGGGGATTACTTCGGGACTTGACCTTGGATTCCCTCGCTAAGAACTTGAATCACACAATGCAGTTTTCATCATCGAGTGCGTTGGACCAAGCACCTAAGTCTTACAGGTGGAAAAAATGGAATGTCTACAGTTACCTCTTTTTGACAGAGCTCGAAGTCAGAAAATGACGTGAGTAAATATCAAAGCCTAGAGACGACCCATTTGACGTAGCCGTAAGACTTGGGCAAGAAAATAAACCAAAATACAAATACCAAAGGTTGAACTCGAAGGTTGCCTATGTATCCTTTTCCAAGGAATCAAATCTGTGTATTTAATGGAAAATGATATGCAGGAAACATAACTTATTATCATGCAATAAAACATTCACACGTATGCTAATAAGCGATGAAGCAACGCAACAAGTGATAATCGGAATACAATACTTGAACAAAAGCATAAATCCAAGAAAAACAAACTAAGCAGCCGTGTCTCACACGGAAAGAAGTGAGTAAATAAACACATCTCACGTGAAAGGAAAAAGGGAGCACAAACCAAACTACGTCTCACATAGAAATGATATAAGAAAATGCAAACCTAACTACTGCTCACGTGAAAAAGAGTACAAACTAGACGACTACTTCTCACGTAGAGAAGGCGAAAAGCTTTATGCCAAACTACATCTCACACAGAGAGGGTGGATGATGGGGTGAACCCCAGGTGTACCTGACGTTTTAACCGAGTAATTGAGATCTTAACGTGTCTCATGCGAGAGGAGGAAATGTGGTATAAACAACAGGCACGCTTGCAGTTTTAACCATGGGAACAATCTTAACGCGTCTCACGCGAGAGGAGGAAAAGTGGTGTAAACAACAGGTGCACTTGCTGTTTTTAATCAAGTGGAACAATCCTAACGTGTCGCACATGAGAGGAGGAAAGTGGTGTGAACAACAGGCGCACCTGCTATATTTAACCAAGCAGAACAATCTTAATGCGTCGCATGCGAGAGGAGGAAAAGTGGTGTGAACAACAAGCGCACTTGCTATTTTTAACCAAGCGGAACAATCCTAACGTGTCACACGCAAGAGGAGGAAAAGTGGTGTGAACAACAGGCGCTGTTTTTAACCAAGTGAAACAATCCTAACTCGTCACACGCGAGATGAGGAAAAGTGCTGTGAACGACAGGCGCATTTGCTGTTTTTAACCAAACGGAACAATCCTAACGCATCGCATGCGAGAGCAGGAAAAGTGGTGTGAACAATAGGCGCACTTGCTGTTTTTACCAAATGGAACAATCCTAACATGTCATACGCGAGAGGAGGAAAGGTGGTGTGAACAACATGTGCACCTGCTATTTTTAACTGAGCGAAAACAATCCTAACGCGTCGCACGCGAGAAGAGGAAATTTTAGATCAATAAAAAGGGCAAACAATTCAAAACTTAACACAGCAAGATCGGAAGGCCTCGGAAAATAAAGCTCGCTGAGATAACCCAATTCAGTGTGCAAAATTGAAGCGAATTTACAAAGAGTTAAACATGAATTTAACAAACTTATAGAAAATCAAAGTAATTGAAGTGACACTCGAATAGGTTGTCGATTTTGCTTTTTGTTTTTTCTTCCACATACAAAATAACAACACAAATTACAGAACAAATAATGAAATAATGGACCAATTTATGAAACAAAGCAACAAAAACAACAAATAAGTATGGAACAAGTAACTACCCAAAGCAACAAAACAAAACAAGAATAAAACCTATTCCTTTTCTATTCTCTCCACTTAGTTATCTTCCCTTTTTCCTATTTTTTGCTTCTTCGTTTCTTCCTCTCTTTTTTGCTTTGTTTTTTTTTCTTCTTTTTACTGTTTTTCTT
>MSTRG.67867.1 Scaffold280 688756-689876
CCAGTTAGTTGTATTCACTTAAATATGGACCATGGAACCCAAGCATAGAAACAATAAAAGCTGAGACCAAAATGTTATCACATGAGCAAGTTAATTGATTAATTCTTAAGATCATGACTAGAATAAAGATATCATATATCATAAATCATAATCATAATCATATTGCATATGTAATATTTTTCCATATAACCAAAAACACAGTGGCCTTGCTTGGGAGTAGGACAGTAGGGCTTCCTTGGATAGGCATGTGTTCTGTTGGTGCTCTGTCCAAGGTTGCTCTCTTTATTTGGAATGCGACTCGCGAAAGGATCCTTAAAATTCATAATCTCATTAGAAAACAACAATTTTTTATCAATTGGCGTTGCCTTTGAAATGGCGACAGGAAGTCAATTTCTCACTTGCTTATTCATGTTATCTCTTGTGTGGCTAGGGATCTATGGGGATTGGTATTGGTTTATTTGGAATGGATTAGGTGTTCCACTGGGATGTAGTGGCCATTATGTTTGGTTGGTGGGGAGGTGGGCTGGGGTGGGAAGCAAACGTGGAAAGCATGGTGCTTGGCTCCTATGGGCTTGATTTGGCTTTTATGAAGGGAGATAAAACAGAAGACTTTTCAAGGAAAATAGCTACCTTTTGAATAAGATTACGAGTTGTTGTCGTTGTTGTTGTTTGTTATTTATTTATTTTTGTGTGTGTGTGTGTGTGGCCATTTTGTATAGTTCAAATTTAGGAAAAATTTGATAAATTATTTCCAACCTGGATCATATTGTGGATTTTGTAGATTCCCTTTACTTGTAAGAAGTTGTAGCATTTTTTGTCTTCTAGACTTTCATATATGGCTGCATCCCCTTCTGATGTCTCTTTTAATACAATTTGCTTTACTTATCAAAAAAAATATCATAGCTAACAGCGCAATACAAATGAACTTTGCAGTGAACCTATTTTAAAATAGTTTCCATACCAACAAGATAAAGATCCAGCTGAGATCAGTTCAGACTCATTTTGAAGCACAAAACCAATAGTATGCAAGTTGCCAACAAAGCAAGCCAAAAAAAATGAGAAGAACATAAAATAACATGTATATAAAAAAAGTGAAC
>MSTRG.50462.1 Scaffold2214 14574-14933
TGAAAATCTATGTAAGCAAAAATAGAAAACCATGATAAAATATATCAAATTTCTCCTCATTTGACGATAATCCCTCATTTATATATCATTTTCACACTCATGACGGCTTCATGATCTCATTCATGACTCCACGAACTAGAAAATAGACATTAGCTATTATTCTGGGGCCATTTGGGAATATTTTTTTTAAAAAAAAAAAGAAGTCAAAAATCAGTTTTTTAACACATTTTGGGTCCTATCATCTCTTATATAAAAAGTTAAAAAAGTCAAAAAAAATTTAAAAATTTAATTTTTAACCATCTTCTCAAAAT
>MSTRG.115436.1 Scaffold5126 461327-466490
CCCTCAATGGGTCCATATAAATCTTTACAAAATAATAGGTCCTCCATTTTAGTTTTCCAAGTTACCCAATTACTTCCATTGAAGCTAGACATACGACCCACATTCCCCTCCATTGATTTACACAAATAAATAGACCAAAATAAACCGTAAGCTCTGATACTAGTTGTTAGGGAAAATGTGTGATTCCCCACAAGTAAATCAATCAATGGGAATAAAAACTAATGCGGAAAAATTAAATCAAAGGCAACACAAGAATTTTTACGTGGTTCCCTCAATGTGAGGTACGTCCACGGGATCGAAATCCGATTCCACTATCAACCAAATAAGTTCCAAACGATTACAAACGAGACACTAATGGTCTCACAAAACCACCCTTAGGTGAATTCCAAATAATCACAAATAAACAAAGAGGAAAGACCTCACCAAATAGAAGAACCAAAATCTTCAGAACCAGAGTTGTAGAAGACCCAAAACAAT
>MSTRG.37267.1 Scaffold1846 1613895-1616362
AAGGTAACTGGTTCAATGGTCCATTTAATTGTCTCTTGAGATAATGAAAATGTTAGATATTCAACATTTAAGTCGATGGAGTAAGTGAGATCTTTTTATTGTAATCTAATTTACTAATCTCCTAATATCTTATCATATGAGAAAAAAATAAAAAAATTATCCATTGAACAATGGATGTGTGGGGCTATGAAATTACTCCATCATGTTTAAAGCTTGTTTGGGAAGCTGCTATTTTACTTATTTTTTTTATTAAATAACCTACAGAGGCATTGGGACTCAAAAAAATTAGGGTAGTGTTTTTCGAAACGAAAAATTGACTAAGACCGGCTTAGTTGTAAATTATTCATTGGCAAACAAGGTAACTGGTCCAATGGTCCATTTAATTGTCTCTTGAGATAATAAAAAGGTCAGATATTCAACATTTAAGTCGATGGAGTAAGTGAGATCTTTTTATTGTAATTTAATTTACTAATCTCCTAATATCTTGTCATATGAGAAAAAAATAAAAAAATTATTCATTGAACAATGGATGTGTGGGGCCATGAAATTACTCCATCATGTTTTGAACTTATTTGGGAAGTTGCTATTTTAATTATTTTTTTATTCAAAAACATATAGAGGCATTGGGACTCAAAAAAATTAGGGTAGTGTTTTTCGAAACGGAAAATTGATCAAAACCGGCTTAGTTGTTAATTATTCATTGGCCAACAAGGTAACTGGACCAATGGTCCATTTATTTGTCTCTTGAGATAATGAAAAGGTCAAATATTCAACCTTTAAGTCGATGGAGTAAGTGAGATCTTTTTATTGTAATTTAATTTACTAATCTCCTAATATCTTATCATATGACAAAAAAATAAAAAAATTATTCATTGAACAATGGATGTGTGGGGCCATGAAATTACTCCATTATGTTTAGAGCTTGTTTGGGAAGTTGCTATTTTAATTATTTTTTTTATTAAAAAACATACAGAGGCATTGGGACTCAAAAAAATTAGGGTAGTGTTTTTCGAAACGGAAAATTGACCAAAACCGTCTTAGTTGTAAATTATTCATTGGCGAACAAGGTAACTGGTCCAATGGTCCATTTAATTATCTGTTGAGATAATGAAAAGGTCAGATATCGTTTAATTAATTCATGATTCACAACTGAATCAACCCAAAACTATAAGAACCAGATTAGTACTATAATAAGCATGAATCTCAACAACCCATTAATATTTCTTCAAAAATCTGAACAATCAATAAAAAAAGGACCCAAAAATTACATATTAAAACCATTTTAACAATACTAATAAAAAGCAATGGAAACAAACTTACAGAAAAGGGAAGCTGAGGAGAAGCAAAAGTTGAAAACAAGTGAGGGTGGTGATGGTTGAGCGGCCTTCTAAGTAAGATTGGAGCTGAAAACAAGGGTGATGATGCCAGCCCCATAGCCATATCCCTTTACTCTTTTACTCTAAAAATGGTTGCAAAATTCAACTGCAGAATGGAAAAACAAGGAAAAAACAAGGAAGATGATGAATCATCATCATCCATTACAAATATCTAACGGATATTTATTGTGGTCATTTTTCAAGGATTTAAATCAATTAAATTTGGGCCTCAAAATCATATTCCCCCAAATCACCCCCATTGTGTGGTTGGGGGCCCTAGTTGGTCATAGGTTAACCCGACCCGCTCACTGTTTTTGTCTTATTTTTATTTATTTAGAAACTTTCAATTTTAGTTAAAAAAAGTGAAAAAAATCACTAAAAAAAAA
>MSTRG.39244.4 Scaffold1890 282108-290977
AATCACTTCAATCTGTTACCAGTTGGTGCATGTTCCATCATTCATTGGAAACTGATGAATCAGTGATCATATTATGAGTCGAAGGACTCACAGGCAATCGTCCTGAAAGAGAGAGGAAGATGCAAGAAATCTCTACTGCTTGTTTAATTTTGGGACGAAGATTAGCTCATAATTACCGAAAAGGTTTTGGCTGAAGCAAGTTACAACACTTGGCATGTCAAATAGACTAGGAGTTCCAGCAATTCCCATTCTATACAACTGAATGATACCAATGAAGAAGAAGGCCATACTGGAAAGAATGCGCAAATTCAAACTGCAACACGAGACCTGAAGTTCCTTGGCAGATCAGTGATGAGGAGAGATAGATTGCTAATTGTATTTATATGAATATACTGGGGGTTGGGTTGTTTGTAACTACAATATGACACATGAATGTTCGTGTTCGCATCCAGTCATCAAAGGCAGTTAGTTGTCTAAAACTTTGATACCTCAACATTTGATGTTGGATATGATAACTAGTTTTTGTTTTTGGGATAAGAATTCCATTTTCATAATGTACTGATCACTTATGAAGTTTTCGTGCTAATGCAGGCTAGAGTTCATGGCCTGAGCTCTTTTAAGTGCAGGCAGTGTTGCAGCAACAATTCAGAGGGAGAATGCTTTGGTCACTGTCTGATTGTGTTAGAAGGAATAACTGCACTGATTGTCTGTGCATCTGACTGTACTTTTGGGTAGATAAAGATTGCATTGTTGCAGGGTTGCTGGTGCTTGACTAGTGATTGTTATTGAGCGATGACCAATGATAATTTCCTCTACCGTATTGCCTTTCGTGGTATTTATCATGTACTTCTGGGACCTGAGTATTCACACTCCATTTTTTTTTTCTTTTAGCCTCTCACAAGAGGAGTGTGGCAGCCTAAAAGTGGTGTGTGAATTTAGCATTAATTACTGTGATATTGTCTTTATATGGGATCCCCAAGAATGCAAGAAGTATAGTTCATGTCTCTCTCTATGGTAACACCAATTGGTTTTATACACTCGAGAACATTGTGCTTTTGGACTTCTTTGGCCCTCACTTTTTCTCCAAGATTTTTAATCCTTTCAGACGTAGCATGTGGGTTTAAACTACTTTGGTCAAGATGTGATTGTGTGTTTTTTTGGAGCTGGACTGAATAGGCACAAAGGAAGTTCATTCTTTCAGTCAGGTTTGGCACTTGGCTGTGTAAGTATGGTCTCTTCAGTTTGGGGAAATCTTGATTATCAAGTCCACATGTATCCCATCTTCAAATGAACAATCCCTTGACTTCACGTCTTTCACACTGTTGTATCAGATTGTCATTTCTTTCTTATTCCCTTCCTGTACTTTTTATTATTATTATTTAGGTGTGGTCCTCATTAAACTCTTACAGCTTAATTACGTTAACATCCAAAATTGAAAATAGTTCCTCAGTTTTTTCTTTAGTTCCAACCAATTGGTGTTTGTTATTGATATGAAGCAAAACTCCTGGTATCAAATTCTGTTGTCTATTTGAAGGAGGGAAGGGGGCATTTGTATTTCAGATGGCGCTGATCGAAAAATTAGTTCTTCCTTCATAGTGAAACAATTTATTATGGCATTGACTCTAGAGTATCATCTTTAAGGGAAATTGGTGGTGGATTGATTGGGATATCAGGGCTTTTAGGTATTAATTCAAAGGCTGAAACGTAGGGAACATGCTGGTTTTAATTTTTGAGTTTTTGGATTTTCTATTACTACAGGATTTGAATTTGGATTGATGGTGTTGACCCTTGGAATGTGATGCCTTAAATTGGTTAGCAAGCATGACCAATGTTCTAATTATGGACTTTTTATGTACTAATAAGTGATTCCATGATCTATTGTGGTAACATATTTAAAGTGATTCATTAACATTTTGCAGGTAACATTTTGTTGCATGGCTCAGCTGTCTTCCTTATTTTGCAGCCACTCTGAACACCAAGATTTGGCTTCTTCAAGGTTCCACCAACTTCTCTACCTGTATTTCGTTTCTTTAGCTTGAGATCGATGGCCACAAATGAGGTGCAACCTTAGCTCATTGTTCGTATCCATTGTCTATGGTGTCAATGTTACTTTCTGGCACACTCCTTGGTTTTTTGGCAGCAACTTGAATTATTATCAACTCGGTAAGTTTTACTGCTTACTGGGCCTATTAAGTGGATTGAATTTTTTG
>MSTRG.55413.1 Scaffold236 779246-786823
CAATACAGGGGTGACGGAAATGGATTTTGACCGAACCCATGTAGTGAAAGATGGCTCATAATCACGAATACCCTCCATATTACAATAGAATTCTCGAACCCAATCGAGATTCTGACGCCCAGAAAACAATAAAACAAGGTCACCACCTAGAGGGTCGAACAAAGAACGAATGTGGATGGACTCAAATGTATCAGGTTGAACATTCCGTTCTAAATGAACTGTGCGATTCACAAAAGATTTGTGGAAGGACTTGGATTGTGTGGCCGACTGAAACCTAACAGGGTTATAGcctcccgctctctgccacggaaagccgcaaatcctcgtcctcgtctgtactgctttttctg
>MSTRG.137224.1 Scaffold740 333728-336991
CCCCCCAAACTCCCCATTGACGGCAGTTAATAGGTGTGTTTGGTTTCGAATTTGAAAAGTCAAGGGAAACATGAGTTAGGCGGCTTCACCTATCCCAATGTAAATGTCAGAACGCACACGCCTCTCGGTCATCATTATACGTTCCCGCCTCATTCGTGCATCTTTTGCATTTATTATGATTTGAAACTCCAGTCTCTTCGAATGCACGCTTTTTTGAATATTTGAGCCTCCTGGATTACCAGCCGGTATCTCTCCTCTGTCTCACGTCTTCT
>MSTRG.13348.1 Scaffold1274 214981-217193
AAAAAGTAGAGAGGAGATGTTGACTGATGTGACCCAAAAAAGATAAAAAGATGAAATAAGTGCACTTTTTTAGGTTAGCCAAACTTGGCCTAATTCAGTTGTTAGGTAAACGAGTAACTTTATTAACAGCCTTCAAGTTCCACAAGAATTATAGAGCCACAACGAAGGGCTAGAGCTCGCATTTACCTCCCACAGCCACCAACAAATACTGAAACCAAAAAAATGGGCCATAAAATTTTTTGTTTCCCTAGTGATATTGTCAATTCTGACTATTCTACAATAATGAGGATAGTTAAGAAACACACCAATAGTTAAAAAACAAGCATAAAATGTTGTGTCAAGTTACACTTAAAGAAACACATGCAACAATATCTCATTGCTTAAATTGACAACAAGTACAACGTGCTATGATAACATTTATTACCTCCCACAGCTACCAACAAATACTGAAACCTATGAAGCATGGACACCTCTCTGACGGCTACGTATCAGTGTCGGACGCGTATCGGACACGGACATGGACACGCAATGGACATGTGTTCGACACGTCGCAAAAGGTGCCCCCCCCTTTTTTTTTTTTTTTCTTTTTTTTTTTTGCAGCCGGACACGTTTCGAAATTAAAGCAATCAAACCAAGCCCTAACCTTGATTTCGAACAGAAAGAGAAGAGGTTCATTTGCTCTTGCGAAGGTATGTTCTTTTTCTTCTTCTGCTTTCCAATCTGTCTCTCAGTCGCTCTCTCTCTCTATCTGCTCTCTCTTTCTACTTTCAATATTCTTCTTCATTCGACTTCTCTCAGTCGCTCTCTCTCTCTCTCTCAGTCTCAGTCTCGCTGTCCCCATGTTTTGTTTCTTTCTTTTTCTTTTTTGTGCTGATTCACTCTCTTTCTCATTCACCCAAAAAAAAACACCTCTCTGCTTTTTTATTTTTTATGTTGTTATTTTTTTCTTCTTTTTTTTTTTTGGTGGCTTTTCTCAATCTCTAACTTTATCTCTGTTATTTATTTATTATTTATTTATATTCTTTTTTTTCAGCTAATTAGTTATTTATTTATTTATTTTCATTGCTTTCAATAATTTATTTTTTTTTTATAATTTTATGACATATCTTTTCATAAGGAATCCGAGCGACTTTCTTACGTGTCGGCTACCTAACACACAACCCTCCTCATTAACCCGGGCTTGGGACCGGCGGAGTTGTTAACAACCCCGGCGGAATTTTATGACATATAATAAATAAATTTAATTATATCGTGTCCGTGCTTCATTGACTGAAACCAAAAGAAGAGGCCTAACAATCATTGTTCCCCTAGTGACATTGTCACTTCCAATTCTATTGTACAAGTAATGAAAATAGCAAAGAAATACAAAAATGTTGGGTCAAGCTTCATTCTGAGCACCACATGCAGCAATATCTTGTTGCTTAACTTGACAAGTAGTAGTACTAAGTGCTATGATAACATATTTCTTTCATTTCTTACACACCGAAATCAAATCATCACTTAAAACTTCTCTAATTGAATGGCACAAACACAACCCTTATTCTCAGTTGGCCATTAACCCTTGGTCTCTCTCTTTTAGTGGACAAGCGAAGCTTAAAACTAATATGCATTTAAACCAAAACCTCAATTACACAATAGAAACTATAAACAAAATAATAAAAAAATTCCCGAGTGCAACATACATCAGCAGGCAGTAAAAAATTTTCTTTTATTTTGGGAAGGGGGATGGGGAGGGACAGCAACTTCTTTGGTTTTTGATAAATGGGGTAAGAATCAACTGCTAGACGATGAGAAGAGTTAAATAGATGTCATGACCACAACAATAATACATTAGAAGAATACAGCATCAGTATTTCACAGAATCTAGAGCAACAAAGCATGAATAACTCAATCCACCATATGCACAACAATGACACTTCAGACAGATCACTAGAGCTTTTTTCTACAACTAAAAAACAATGGTTAAGACAAAAATTCAACGGTGCAATAACTTACAGTTTTTCATGCGCCAAGGAAACTGTCTCCCAAGGAAGAAACGAATTGATTCCACGCATTAGAGACATGAAAGGTATCATAGAGAATAGCTGTTCAATAAATCCACATGTCTAAGAACACAAACTTCAAGAAGAGTCCATATGAAG
>MSTRG.52927.4 Scaffold2286 405254-406794
GTCTATCCTAAGGTGTTTGAGGTGTTCTTCGGACATTCTCGTGATTGCTACATTGTTTTCAAACCGGGAGTCCCGTGCTAGTTCTGTAAGTTTTCACAACTTACATTGGTCCCTCTCGAGGTGTTTGAGGGGTTTCGCTGGGGTTCTCGTGACTGTTACACAATTTTAGCCCCCCGATAGCCTATTCTCAAGATTAAGTGTGAAAAAAGTGCAATTTTTTACTTAGTTTTGAAGCGAGGAGTCCCGTGCAAGTTCCGTAAATTTTCACAACTTGCATTGGTCCCTCCGAGGTGTTTGAGGTGTTGCTTGGGCCTTC
>MSTRG.27957.1 Scaffold1629 1943733-1944626
AAAATGTAGAGCCAAAAGCAATGAGGCCATTGCAGAATCCCAACCAGGAGACTAAAATAGAAGTTCATATGATAAGCAACTCAGGCAGATGCCACAAACATTTGGTAAAAAACACCATTTTGCCAAGGCAAGAATCAAAGACTATAGCTTAGAAGCCAATGACGACATCTTCTTAGACCACTCCACAAATTTAATTGGAGGAAAACAACTTACAAGACAATGACTACATTTTCTTATCTCCCATGTATAGAATCGTCATCTCTAGTTCAGACTACTATAGTTGGGGAATGTATTCATATCCACTTTATAATTTATACTAACTAGAGGTTCAATGTCCTAGGAATCACATGTCCAGAAAGGGCATCAACGTCCCCTTCATAAAAGACGAGTCCTTCAAAGATACAAGATGACTAAAAAACACCAAAGTAATTACAAATCACATTATAACACTAGATATACTAACAACAGAAGGTTTATTTACTTATATTTTAATCAGAAAATACTATAGGTATAAGTGGTCCTACTACAATGTTACATTCACCAAATGCATTTGTGTTGGAGGTGCCCGCTACAGATACTGCAAGGGAATCATGTGAAAACTTATAAGTGGCTTCCTTATGAAATATGAACAGTTGTTATATGATTAACAAGAATGGCCGTGATGTTTTGAGTATATACTTAGATAACAAGCAACATGAATTGGCCTATGTCAAACCAAAACACTTCATGACTGAAACTTCAAACCAACATGAACAGCTGGTGTCTATCCCAAGTATCTAATTCCCGGGATATTAAAAGTTTGTAGACCTTAGAGAATATAAGTAGATTTAGCCTTCAAATTCT
>MSTRG.104937.1 Scaffold4364 1006890-1008744
GCAGGGTTATTGTCAAATCAATTTTAACGTATATAGAAATGTGTTATTCAGGAGAAGAGACATGAAGTCATTAGAAGTGAAAACAAGTACCCTTACAATGCATCTAAAATGACCAAAAAAAAGGGGAGGTGGTTTGTTGGGACTTGGAAGAGAGTAAGCCAAAAATTTCAACCTAATTGTTTAAATTTGTTCTCTAGTGCCTTGCATATGGAATCAAAGATGATTTTAATAAGAGCTACTTCTATTTTAATTATTCTTATGAATAAGCTGAATGTTCCAGCCCTCAAATATAATTCAAATCACCAGAATACAAATAAAAATGGTTCGTACCTAGCATTTTTATTAAATATTCAACTATTTCTGATTCTATTTTGGACCTTTTTTATATGGACAACAAAGTTCTATTCTTCTTTGCTATTTTTAACGGCGTTGTGCAAAAGTTTGTGCAGAAATGGGATCCTAGGCTTGAATTTCGAAATGCAAACAAGAATCGCATTGGAGTCCGATAAATGAGTGGAAATTTACTTCTGACTGACTTCCTGTGAATCAACATGTAAGTATAAACTTAAAGGAAACACATCATAATAGATCAACAATGTATATATATCAAATACCGTTAGGCAGGCAGGCAACCAAGGCAAGACCTGTTTATAATCACGAGCCCGCATTCATTAGAAACCAAACAGGAAGCAAATGAGACTAAGCTGTGATTCTGGTTCAACCAAGGGCAATACTGATGACTAAGGGTCCGTTTGGGATGATAGTATTTATTTAGCTAAAAATACACTTCCCAAACGAATCCTAAATATTGTGATGCGATGGCAACCAACAACAATGTCAATCTCATGGTTTCGTTGTGTGTCATTCTCTAGTTTACAAAAGTAAAAAATCTACTTACTAAAGATTTCTACAAACTGTTGGATTTATTTTCTAGTGTGGCCCAATAGCCTATATATTTTTACATGTTTTATTTTATTTGGACTCCACAATTAGATAAAGCCAATATTATATATAAAGTTCAGTAATTAGAATTTTAATATAATCACTCTTCTAAGATAAGAAGGAAACCTTGATGGATTAGGAATTCTTCTGATAGAGTTTATCTGGCCCTCTTCTCCCCTCTATATAAGGATGGGTGACTCCCCTTCTTTTGATATTATTCCATCACTCTAAGTTTTATAGTCATCCTAATGAAGTGAGAGACAGAGAGAAGAAGGTGAGCCAAGAATTAATGGTTTAACTATTAGGGGTATTTTCTCAACTTCTCTAATTCAATCGCTGACAAAGGTATGTTCGTTTTATTTTTGAGCTGTATTAAATTCAAGATCCTGTTAAGTTTAATTCCGCATTATTATTATGGTTACATGTATTATTAAATCTTACATGTGGTATCAGAGCTTTAGTTTGTGAATCAATACACCTTGGAATAATAATATATTTATGAATATTGTTATTATATTATAATTATAATTATTCATAAAATCATACTTTTGTTTATAAGGTTTGAACTCTGTTGGCATGTGATGTGCACTCCACTAAGTATGCACATCATGGACTCCCTCACTCATAAGACAACATGATCTGTTAGGTCCTAACCTAAATAAGAGCACAGTCCACTCACTTTGTTTTGTGATTTGCTAGGTGCAGGCTTTTATGTAATCCTATATGCTGTTCATATGCATGTTTTGATTTATTATCAATTTTAGTGATAATAATTTTTATAATCATCATAATATGATATTGAATTGAGTGTATTGCTTGCCGTCATGATAAAGTGCATAGATTAAATGCAATCTTAGAATTTTGTTGAATC
>MSTRG.37087.1 Scaffold1845 79980-207127
AGATAGTTGATAAGGTTCCAGGTTAAGAGAACTTGTCAAGTACATCTCAAATGGATAAGAAACATTTGGAGAGAAATAAGAGAAACTAGGACTCTTTAGCCGATACCCAATTCTCAGAGGTGCTGCACAAGCGCACGGCATTGGAGAAACTGGCATATATTCATAGTTACCATCCACAGGGCATGCCTGAATTAGACAAACCATAGTTGACTTCGTTAAGTTCTCTGGAATGTCA
>MSTRG.99335.2 Scaffold4118 948168-950555
TGGATGAGGCAAACTCTTACCAAGCATGATGCTTGGATTCGAGTCTCACTATTGCATGATGCAGCTTCCCCTTTCCCTATTCCTTCTTATGGCTTGGGAAAAAAATAATCTCCATGCACACCTCCAATACAAGGGCCAAAAAAACACAACAAACAAATTTGTGAGAGCTTGATATGCATTTTGGGCCCATACATTTAAAATATAAACTGTGGGCTTGGGGTATACTAGTAATCCTTATCTGTTCTCCTCTCCACATGCAAGCAAGCTGGCTTCCTTTCTATTTTTATATTATTTTTTATTTCCTCGATAAAAATTGAAGTTAATTGCATTAAAAATATATTGGGGGCTCTTTCAGTTGGATAATACAGACTAGATGGCCAACTCCAGGAGCCACATGATGAACCAAAAGAAAACAAAACGCTTCAACATAATACTCAACAGCAATCTAACTATCAAGAATTGTGCAAATCAAAATTCTCACAACCTTCCCAATGTCTGGCCAATGTCAAGAATGCCTCCATACCCATCAAATCAAGTTAACCTTCCACAAGCAAGTCCTTTTCACATATGCAAAGAATTTTATCACAAGCTTTCTCATTTATAAGCAAATCATATTCATGACTATACCTTGAATCATCAAAACGTTAAATAACAAATTGCTCAAAAAATGGAGGAGATCATGAAACTTTCAAGAGGAACATACACAAAACCCTAATAGTTAGGCCTTAGTTTTTTTCTCCCAAAAAGCCAACACTTTACTAAAGGCAAGTTTGGCAACCTACTAAAATAGCCAAAAACTCACTACCAAAAAGTTAACTATTCTCCCTACTTTTCTGTACATTTTTTTGCCAAAATCCAAAAAGCCAACTAAAATAGTTAGTTTCCAAAACAATCCTAAATCTTCACAAGCGTCTCTGGCAGCTTTGCTACAGACACACAAAATATATATATATATATATAACCCTACTACAGATACCACCATCCTTGCAAAGGCGGTGGCGGTGGCGGTGGCGGTAGCAGTAGCATGAGCAGAGTAGAAACATTTTCAAAAAAAAATAAAAAAATAAAAAAATTACAGAAAGTGCACAAAACTGTGCACTTTTTCTTGATTCCTAACTTTCACGTGTGTCTCTAGATGTCCTGTTGTGAAAAAAAAAGGAATGTAGTCTGATAAAAATAGACAATGTCATGTCATGGAAAAGTAAAACTTTCCAAGTCCTAGAGAGGTGAGTGATATTAATAGTTGGAAGCTTGAAGGACAAATATACAGTCTGCCGACTACTAATCTTGCATTTAAGTGCATGCTGCGCCAATATGTCACTTGGGGGGGGTGTTGGGACAAAGGCTTTATTGTTAGCCTTCACAAGGGGCGAAAAGAAAGAGGTACTATTGGACAAACTTTTCCAAAGTGAAGATGGTGGCCCTTCTTGTCCTAGTTGTACACTAGGCTTCCCACATATGGTGGTCGGGACTCACCATTGGACAATATTGATCATGGAGATATGATTAGCCAAAAGCGAACAGGTGAGGTGACCCTTAACCATTAGGAAATTGTCATCAGGCTCCAGCATACACAGGTGAGATATGTCCTACATGCAATATCATGGAGGGATCAGAACAAGAAGCATGATGATGAATTGTATTCTAGGATACATACCAGTGACAACCATCTCAATTCTAGTGTGTCTAGCTTCCAGGGTTTGAGCAATTATATTTTGGAAGTAAGTTCTAAAACTGAACGAAAGCTTTAAAAAGAAAATAGGCACAAACCGGGTACAAATCCAAGGCATGCTGAGATACAATCATCAAGCTCTGCCAACATCATGAACTCTGATGATGTAAACTCCCATTCCTAAATCTATAAACAACTTACATGCTCTCTATGATCTTAAATGTATACTGAACATCAAAGTTAGGATTCAAGACACCATTTATTAATTCCAATTATTTAGTCTGGTGAAACTTCAATTTTATTTGAGGAGAAAAGGGAGAAGCAATGAAATCACTACCCTTGATCTTGCTTGTTTCCTTGAAAGTAAAGAGTAGAGAAAATAATCTAGCAAAAGCTTCCCTAAGAGGAGGGTTAGCAACTGTAAACAGATAGCTTTAAGATACATGGGCGGTGAAAAACATTTTAGATGAGGCAATGAAAGCCTATTTGGAAGATGGAGATCAACGATGAGAACCCACAGTTCTAAGACAAATCAGCCAGTGCAGCAGGTCAGCTTCCAAGATATATTTCTTTGTGATGCCTAAATAAAATAGCAAATTTCTAGGCAGCTAGTGTCCAGTCAGTGAACAGTGTCAA
>MSTRG.114125.1 Scaffold502 230802-232316
TTTTCACTAAAAGACAAACTTTTTGCAAAACCAAAAAAAACACATCCAAACAAAATATCACATCCAACCCCATAATCATTTCACTTTTTCTCTCACAAACATCACATCCAACTACAAAAAAACCCAACTATCTTCCCAAACACTAAAATTTTTTTATCCAATAATATCCTAAAACTAAAAAAACCTACATAAAAACCCACTTCCCAAACACCCACATATGAATCTTATGTTCCAGGTTTGTTCTGCTCATTTATAAAGCAAACATACATTCAAGTTCAGATTGTTCACAAAAATTGATCACCCAAAATCTGAGAATTGATAATTTTGAGCATAGATCTAACACCCACCAAACTTCACTCACAGACCCACAGTCAGACCAACCAATTCGTGGCCAAATCCATTCCCTGACTCTGTGCAACTCCCTGATGGTTGTGCACGGTGGGTGGTGATGGTCGTTGTGGGATGTGATGATAGTGGATGATGTTTACAGTGGTGATGACTTGTGTGATTACGTGTTGTGGGGATGATTGGGTGAGTGATGATGGTGGTCATGTGCAGTGGTGGTGGCATGGTAGATGTTGATTTTGGGTGATTGGTTATGGAGAGCAAGAGGAAGCTGGGGATTAGGCAGAGAATCAAAGATGAAGAGTCAAAGAGGGGACTAATAAGTTTAGGTTAATCACATTTTTAATCCAATGGTCGACAGTTTTATATGTAATATGTTATAAATATATATATATATATATATATAGTATTACTTATGCTTCGGACTCCTGATGCCTTTGCTTAGGCATGGCCTAAACTGAATGCAGGCTTATAAAATCCTGCCCGAGCCCAACACAAGTTCTTAAAATAAACTTGTCCAGGACCAAAAAAATAAGGCTAGGTTTGGGTTGCTCCGGTTCAATTCAACCAACCCAATTTGCATCCCTAGCTCTTATCAATGCTAACTTATATACAGAGACAAATTTCTACGTGCATTTATGTTTTAGCATTTAGCAAGTTATACACACACTACTGTCTCAAATGAAAATTGCACCTTCCACCTCACTCCTTAGGAGTGGCAATTCCTATTAGATATGTTCCCTTAACAA
>MSTRG.17773.1 Scaffold13818 101352-103242
AGGTACATGAATTTGAAAAAGAGAAACAAAATTAGAAGGTTTGATTGATGCAGAGTAGTAGTAGGGGAGAGAGTTGGATGAGCGTGGGTGTTTTGAAATTTGAAAATTGTGAGTGAGACTAAAAGAAAAAAAAGATGAGAGTTTATAGAGAGAGTTCGATAAGCGTGGGTCTCTTTTTTGTAGGGAGTGGATGGGTGTGTTTTGAAATTTAAAATGTGGAAGGGTGAGGTGAGAGAGTTCAATGAGCGTGGGTCTCTTTTTTGTAGGGAGTGGATGGATGTGTTTTGAAATTT
>MSTRG.61858.2 Scaffold257 6207130-6207895
CAATATTGATCCAGAAAATTTCTCTGGACTGATCTAGAGAAAATTCGATCCAGAGAAAATTTTACACATCACAGAAAAAATTTCTCTGGACACATTACAAAGAAAAATTTACACATCTCCAACACCAAATTCTCTAGATACATCACAGAGAAAATGTTACACATCTGTAACATCAAATTTCTCTGGACATATTACAGAGAAAATTTTACGCATCACCAACACCAAATTTCTCTGGACACATTACAGAGAAAATTTTATAAATCACCAACACCAAATTTCTTTGGATATATCACAGAGACAAATTTACACATCACCAACACCAAATTTCTCTGGATACATCATAGAGAAAATTTTAAGCATCACCAACACCAAATTTCTCTGGATACATCACAGAGAAAATTTTATACATCTCCAACACCAAATTTCTATGGACACATCACAAAAAATTTTTTACACATCTCCAACATCAAATTTCTCTGGACACATCACAGAAAAAATTTGACACATCGTTAATACTAAATTTTTCTAGACATATCACAGAGAAAATTTTACACATCCCTAACACCAAACACCAAATTTCTATGGACATATCATAGAGAAAATTTTACACATTCCTAACACCAAATTTCTCTGGACACATCACAGAGAAAATTTTACACGTTTCCAACATCAAATTTCTCTGGATACATCACAGAGAAAGCTTTACACATCTTCGAC
>MSTRG.21998.1 Scaffold1492 111767-116358
AAGAAGAAGAAGAAGAAGAAGAAAGAAAACCAAGATTCAAGAAGAAAAGAATTTTCCAAGAGAAGAACATGGGCCACAGCCCTATACACAAAAGTCACAACTTTTCTCAACTCAAATTCACTAATCAACTCTAACAAATTACAATGTCAAAACCTTTATTTATAGGCTAAAAAAAACCCTTATAATTTTAAGGAAAGTAAAATTCTTGATGACTAAGAAACATACTAAAAGGAAACAAATCCTGAGAATCCTAATTAAAAATCCTTGATCACTAAGAAACATACTACAAGAAAACAAATCCTAGCAATCTTAATTAACTATAATTAAGACGTTAAAAGTGAATTTTCGGCATGAGATCTTCTGTACCCCTTCATTTGAAATCATGGCCTTGAAATTGCTGGGCTTGTGATTCAGTTCCACTCTGAAGAAGTGGTCAAAGTTCAACTTGTTTCAGAAGCTTCAGTATGGTCTAGTATTAATAAATAACAAGTTGGAGGTGAGTTAGTACTATAACCAACAAAAATTAGGTGTGGTAGGTGAGATATAACAGCTAGCAAATGGAACATACTCTAGGTGTAAATTAAGCTTCAATTACTGACAACAAAATGGTAATTTCCTGGCTCCATTTCAGCCATTTCTGGTGGAGTCTGGGCAAACTGAAATGCAATGTTATTTCATAGATACATACTTGGAGGTGGGTGTCTGGCAGTATAAATTAACAGAAGTAGGATGCTTTTTTCTGAACTGGGAAGACAGTTGTGTTTATTGGCCGCTTATTTTATTTTATTTTAATGTTTGTATTCTTATTTGCAACGTCTTTAACATGTAGATTTTTTGGAAAAGTGGAACTTCAAGGTGCTGATAATTTAAATAATAGATCTATGCTGCATCATAAATTTTGCAAAGCTCTGGGGTGTTTGCAAAGCTAAATGTACTAGAGTAATTAATTGATTGTAGAGTGGTATGTGTGAGAATAAACTTGTGGTAGTTATTTAGCTTGGGAGAAGAACAAAAAGAAAGACACATTAA
>MSTRG.92690.3 Scaffold3801 821784-828905
CCCTAGGTTTCGAGTTCATCTCTCTCTAAACTCTCTCTGTCTCTCTCACACTTAAACGGAGGCGACGAGAATCGATCGGTATCGGCGACTGTGGTCTGTGTTGGCGATGGCGACTGTTTTCTATGTCTTCTTTTCTCTTCGATGATCGGCTAGCGACAGATAAGATGTGTAACTACTTTGCGTGGGGAGCAGCTCCTACTGGAAATGCATCAAATATCTAAAGGAGAAGTAAAGTTATTCATATGAAGAATGAAGATGAGAGAGTGTATTCCTACTGGAAATGCATCAAATATCTAAAGGAGAAGTAAAGTTATTCATATGAAGAATGAAGATGAGAGAGTGTATGGTTATGATTTTGAGAGAAACAATAAAGTTAAGAATAGATTAGAATGACTTGAGGCAAACAAAGGAGCTATGAAATTCATTATGTTTACAACCATAGTGTAAGTTGGTTTTACCATGCTAATGGTGTTGCTCAAGTGAATGTAACCACTGTTAGTGAATGTAACCACTGCTTGTATAACTTGTATTTGGGTTGTAAAGCTTAAACACTGGATTTTTGATATGTACATGTAAAATCCCAACAATGCTTAATTAATGAAGTTACCTATGCTATGTCAATTGTGTTGATTCTATGACTCAATTATTTGAGTGATGTAGATTCGTAACAAAATCTAGATCAAGTTGGGTGTTATTCCGTACTATGCTTAATTAATGAAGTTACCTTTGCATGTGGGTGTGTAATTTATAATTCTTGTACTTTTGCTCTTCTCTATTTCCGCATTCTAATTGGGTGTTATAGATTCCTAACAAAATATGGATCAAATTGCCAG
>MSTRG.51245.2 Scaffold2245 1894933-1914120
GGGACAAGAAAAATCAGGATTTGTGAGAATCTTAAGTAAAGAAAAAGAAGAAATACCTTTCTGGAGAGATTATGAACACCTTTAAAAGCTTGCGAAACAAAGAGAATCCACTAGTGATGATGCCAAGAACACAGAGAGGATCAGAGGAATAAGTAATAGTAGTATCATTCAAGTATATGATATGAGAGAGAGAGAGAGAGAGAGAGGTATGAAGTCATCATTAATCACAGGAAGCAAAACCCAGAAAAGGGGAGATGCCTTAGTACAAGGAAAAGTT
>MSTRG.30953.2 Scaffold1708 278741-281430
GGGGAAAAACAGAAACAAAATTCAAACCAAATCAAATTTTTTCTGATATCCTGGGTCTCCCACCACAACAATTGAGGTCATCAAAACATCTCTAGGTTTAGCAATCTGTAATAAAGAGAGAACTAGGAAGAACTCATAATCCAAGTCTGTTCATCGGTACACTGGTATATGCAGCACTTAAAAAGGTGTAAACTTCATATAACAGGTCCAAACCAAACCAAACCAAACGCAAAATCCTAAATCACCTTAGATCCACTATTTCTGTGTCGAACTAAAGGATTTTCAGTCCCTACATATGTAATAATTGGGTAATATCCCGCTAGCAGTTTTTTATTTGTACGTAAAAGTCTATGCCGACAAAACCCTCCGGCAGCTGTGCCTGCATCATCAACCAATTTCAGAGAGTCAATTTATTATCACCATTTTAGATATACTTAGATGACTAAAATCAAATTCACACGCCATCAAAACTCAAAAGTTGGTGACAACACATAAAACTCAACATTTTCTGAGCACTCTAAACATTTTACACGAGGCACTGCAAATTCTTGTCTTTAT
>MSTRG.137561.1 Scaffold7413 626545-634614
CCCCTTAACACATCCATTGCACCACCACTCACTCTCTAAAATTAACAAACTCTTAACACACCTTAATACGTATTTTTTGGTCCACTTTTATCACATTTTGTCATATCACACACTTTTTTAGCTATTCCATTGTGGATGCCCTAAAAACTAAAATAACCTACTAAAATAGCAATTTCCTAAACACTCACTATATATATTATAGTAAAGGATCATTTTAAAGAAAATTTTTAAACTTATATATAAAATTTATTTAAGGGAGATAAAATATAAAAAAATAAATATAATTATTACATTTTTAATAAATAATATATTATTTTATTCCGTGTATAACACGGGTGATAGGTTAATTTAGAGGTTGTTTGGGGTGTCCTAAATAAGTGTACTTTTTGTCTTTTTAGATTAAAAAGTTGAGGAAAAAAAGATGGATATTTGAGTCAACTTTTTGACTTTTTACGAAAAAATGTGTATTAAAAAATTGTATAAATAAGTGTGTAGGAGAAGTATAGTGGAGTAGGTGTACAATTTGGGCAGGGTAGTGGGTTGGGTAAGAGATGGGAAATGATTGCCTCCTTTTTGGGCTTGAATTAGACGGTGTTATTCGGCCCGTGGGGGCCCACTACAGGTCCCGTTTTGCTAATCGAACCGTTCAATGTGTAGAACTCGTCGAGTACTATATGTTTGTAAAAAATCACATTGATTAGATATCGATAGCTATCTGATCGTGTTAGTTTTCTTTTGTCAACTGCTACCTATAACACCATCTTTTTTTATACAAAACTGATTTGATCATGTAGTTAGCGATATCCGATCAACGTGATTTTTTATAAGCATATAGTTTTGGATGAGTTCTACATATTGCACGGTTCGGATTATCAAAACGGGACCCGTGGTGAGCTCCCACGGGCCCAACATTATCGTCCAACTTAATAATTTTTTTCCCCTGTTACAGTACTAAAGGGGTCAAGTCAGTCTTGAAAACGGTGTAAAGTTAGTTTGATTAAAATATTATTTATATTAATTTTTTTATATTTTTTATTTGTAAATAGTGATAATTTTTTTTTTTTTAACTTTTGACTTTTTAATTTTTTTTTGGAAACAACTCAAACCAGGCCTTAATAAGAAAGAAAAGAAGAGATGAGGCGGGAGGAGAGAGAAGAAGACAAAAGAAAGAGAGAAAAGGGAGAGCAAGGGTGACGAGAGGATAGAGAGGACTATCCCATCATTATAAATACTCTTTCTCATTGACCCATACGTACACCAACCATGACCTAATCAAATACCAAACAGCTTAGTAGGTGTTTGGAAAATAAATTTTTATGTATATTTTTTTAATTATAGGATATTATTGGAGAAATTTTTTTTAGTATTTGAAAAGATAATTGAATTTTTTTGTGATTAAATATGATGTTTATGAAAGAAAAAGTGAAATAATTATGAGGTTAGATGTGATATTTTGTTTAAATTTGTTTTTTTAATTTTGTAAAAATTTTGCCTTTTAACGAAAAAAATAAAAAAAAACCCAAATTTTTTCCCCCAAACACCGCCTTAATCACATCATTACCATTATCTCTCTTCTCTCTCATCTGCACTTGCCAATTTTTCAAATTTCATAGTGAAACGTAAACCACTTTTTTATCACTATTTTTTTTAATAGAACTTAATTTAAATTTTGAACTCAATATATCAAAAATAAATAAACAATTTTTCACACAATCATTTTTTTTAGCAAAATCACTTTTTTTAATAGCGTTACACTAATAAATATAAAGATTTTTAATGATGTTAAGTC
>MSTRG.125276.1 Scaffold6055 357621-361262
cagtaacatcgtaaacaatttaactccttgaaaaatcccttagataatgtctactaaaaatcttaaaagtgagggattttatagatttttaactattattcGTATCTGTTAGGATGCTTTACAAGGCCTATTTAAGAACGGTTGTGATTGAGACCCCCTCAATCACCAACCCCCACCACTCCCCACACACACGTGGTGGGTGGTGATTGGAGGAAATGGAAAAAAAAGAAAAAAAAATTGGCCAATCAGGAAAAAGAGGAGGTCAAAGGGGGTGGAGGGAAAGGGGGTCTTAATCATTTTTCATTTAAGAATTGGCTATTTTAGTTGATTTTTTGATTTTTTATGAAAATATGTGCAAAAAGTAGAGAGAGTGATGCGACA
>MSTRG.115554.1 Scaffold5132 468231-470645
AGAGAGAGAGAGAGAACTCACGGTGCTGAAGAAGAACAAAGAAGAGAAGAGGAAGACTTCAAGTTTTGTGCTGAAAAATTGAAGGAAGAACTCAAGAGATTCAACAAATTAAAGTTCTAGTGTTTGAAGTAAAACAGAGTTTTTGGCCTGGCCTAATTGGCCAGCCGACCAGCTTACTTTTTGGTCGACCAGCTCATCTTTTGGCTGACCATCCACTTTCTCCTTGACAGAATCTAGCAATCCCTCGGATGTCGAGCAGAACAGTCTCCGATGGTCTCCGAGGCCCCCTGAAGCTTCTGTTTTTATTGTTTTTATTTAAATTAGAGAGAATTGTGAGGATTTAATTTTGTTGTATATTTTTATTCCTCTCCCCCCGTATTCTGATTTTTAATATTTAAAGTGATGTAATAATTTCCCATCCCCGCTTCTTCCTATCTTGTTCTTTTAGTCGTTTTCCGT
>MSTRG.27803.5 Scaffold1627 622109-629149
CCCAAAACCGCTAGGTTTCCAAAGAGTAGTTCACTCTCTGCTCTCAAATCACGGCCATGCACAGCGGCGGAAGCACCCATTCAACCAATTCCGACGGCGGCGGAGACGACGGAAATGGTGGCGGCGATTGTCGTCAGCTCACACTCTGCCTCACAAGCAATAATAGCCTTCCTTCTCAGACTGAGGTAATAATAATCTGAAGATGTGCCTTGCTTGTGCTAATGCAAAGATCTGCCGCTAGTCAGGCCATTATTCATTGCAGAGAAAAGAAAGTCTGCATCCTCCACAGGACCAGTACGATAATCTCACTCAAGCTATGACTATGGTGACATCAGTGCAAGCAGTTGGCATACTTTTCTCTTCTCGTCTATCCATATCCATAGAGATCGGTAACCTAATTATTCGACATATAAATAGTGTTTGTTTTTTATTTATTTTTTATTTTGCTTTTAATAATAGTGGCCTGCACTGAGATGGCTGCCAAGTGGGATTTCTGGTAAACTTTTAGGTAAAACAGGTGGGTTTGGTGGACTTATTACCATTTTATTTATCATATGTAGGATCATATCTTGAAAATCCAAGGAGTTTCTGACGAGGACGTTTGTTTGCACTATTGTGTTTTTTCTATAAGCGCATATGGAGATCCGGAGACTATTCAAAGGAACTTCACAACTCTTTACAGTTGTTGTTTCTTGTACCGAATGAGATGCCCAAATTGCTTAAACAGGTATATATTGGACGGAAAAAGCTTGAATTCTACATGAAGATCCAAATAAAGAAAGGAAAAGCTGGTGCTTCAAGATTCTTTTTGCCCTGAACTTTGTCTCGTAATTTATAATCTCGTTTTCCCCAATGTTCTTTCCTTTTTTTTCTTAAGACTAGGAGCTAAAGAGAAGATTGGTTGACTTGACAGTTATTGGAACATTTTATTTCGTACTGTTGAATGAAGCATTGTATCAAAATTATTTTTTGACTGAGC
>MSTRG.22537.2 Scaffold1502 162998-164064
AATCAATTTTAACAGTTACACCAAACGGGGCTTTTATATTATAACAACTAGTATATAGATTATAACCATTATCACATTAACTCATAACTTAGTTATATTTAGTTATTCATGTATACCATATTATTTCATAATTACCACATAACTAAATTATTTTAATAATTTAATTTTGAATTGAAAGAGGGCAAAGGAAATCAGAGTAATACAGGGGTCCCAACATCACATATCTTATAACCATTAGTCACATATCTCATAACCAACATTTTTTTTCATAATCAACATCACATATCTCATAATCACTAGTCACATATCTCATAACTAATACCATTTTGCTCATAACACTACTTTGTTCATAACTAATATCACATATCTCATAACTATTACCTACATGAATTATAACAACATCTCATAACCAACTTCTTTGAGTCATAACCAACGTCACATATTTCATAACCACTACTAGTCATATATCTCATAACTACTAACCTTTTTACTCATAACTACACCACTTTGATCATAACCAATATCTCATATCTCATAACCACTAATACATATAGCATAACCAAACACCATTCGACACTACTTAACTCATAACCAAAATCACATATGTTATAATTACTAATCAAATATCTCATAACCATTATCCGCATATCTCATAACTAATATCACATATATCATAACTATTAATCACATATCTCATAACTACACCACTTTGCTCATAACTAACATTACATATCTCATAACCACTAATCACATATCTCATAACCAAACACCATTTGATTTATAACTATATCACTCTGCTCATAACCAAAATCACATAACCAAAATCACATATCTAATAATCACTAATCATATATCTCGTAACCTTTACCCACATATGTCATAACCACATCTCATAACCAACACAATTTGCCTCATAACCAAAATCATATATCATAACCACTAATCACATATCTCATAACCATTACTCACATATAGGTGTGTAAATTTGGCCTATGAGCTCGAGGCACACCCCAAGTCCAGAAATTTCTCTCTCTCTCTCTCTCTC
>MSTRG.84748.1 Scaffold3463 582222-583000
GTTTTTGAGAGAAAACTAAATTCCATTTTTCTTGTTGAGGATTTTGTAAGAAACACCTTCTTGTTATTCATCATAAGGTGATCAAAAGAAAGCGCCCAAGTCTTAGGGCCGGTCAAAATGAGGTGTCTACAATTGTCTCTCTTTAACAGAGCTCGAAGTCATTTCATGACATAAGTGAATGTCAAAGTCCGAACACAACCCTTTTGACAAGGCCGTCAGACTTGGGCAAACAAACAAAATGCAATGCAAGTGGTTGAATTTGAAGGTTGCCTACGTATCCCATTGCAAGGAAT
>MSTRG.22107.3 Scaffold1492 2009569-2010580
TGAAAACAGTACAATGAGTGAGAAAAACAGAAAAGGTGTTAGGGTTTTACCTTCGCATATCGGTCCAGAGACTCGGTTAGGGTTTTGTGCCGAAACAGCAAGCAAAGAGCATGTATAAGGTGGTTCAAGCTGAAATTGAAGTGTCTGAGCCAGTTCTAGGGCTACAAATCACATGCATTGTGGCCGAGAATGGGTTCATTGTGGCGGGGACGATCAATTCAGCATCTTTTTGTTTGCGAAATTTGAGTGATTTCGATTGACGAAGCAGAGAATCATAGATAACAGGTGATAATCGTGATCGAATTGTGCGAATCCATTAGACTACACAGAACAACTCATCTCCTCTTCCTCTCTCTCTCTCTCTCTCATGTGCAGAGTGAGTCGCTATCGACTCCGTCAGGGTTCGATCTTCTCTCTCCTCCGGTGCGGTTGGTTTAGCCCTGGCTAGGGTCCGTACGTACACCACATATATATATGTGGGACTCGCAGGAGATATGTGATGGGCCCAACTCAGATCATAAAATTTCT
>MSTRG.128157.1 Scaffold6353 200194-200826
TGGTGCAACCGTTGGAACACTAAACAGTAATTTTTTCATCAAAATTTAAATTTGATATCAAGTTTGGTGAACCGTTAGAGATAGTCTAATGAAAGTGTTAGGGTTTTGTCACCTCTCTAACTCCCCAATTAGGTAGAATTGTTATTGACAAGAGGCGTGATAATTTCTCTAAAGAACAAGAATATTTTAGTTGTTCTACTGTATTAAAAGTTTTATTCCAAAATATGCTTAGTTATCATGAATTACAAAACGTGAACTAAAAAACAAGACAATTGTATTTTAAAATAAAATAATCGTATCTTGAACCCTTATCATGAATCATATGGGAAAGAATAAAAAGTCACTCCAATGAACCCAACTTCTATGGCTTCCACTATAAGAATAACTCATCTCCATACCATTCATTATCTTTCGCATTCCTCCATACTTCATTTTATGGATCAAAAATGTTAATTCT
>MSTRG.134142.1 Scaffold70 881899-916567
AAAAAACAAAATAGGGTTTTTTAGCCCAATAAGACAAAACATCACATTCAACCCATAATCATTACATTCTTTCTCTCACAAAAAAGTAAAAAAAGCCAAAAAAGCCAAAAGCCCTTCCCAAATCAGGCCTTTTAGCCTCAGGTTAAAATAGCCAAAAAGGCCAAAAAGCCAACTCACTTTCCAAATGGAGGCTAATTGTTGCTTCACTAGTAGCCCCCAAATCTTCTTCTAGTTGTGCGCGTGTGCATGCAAAAGAGAAGAAGAAAGGAAGGGTATAGACATCTTTTCATGGCTAATGTTGATGGAGTTGGTGTACATTTTAGCCCAAAACCTTGTGGTAGTAATTGGCTATTTTTAAAAGACAATGAGGTAAAGTGCTCTAGGCCCATACAGCTAGAGGGTAAAGTGGATTTTTCCCTATTAACATATTTTCTTGAGGGTAATGATTTATGGAAGTCCTTTGTCATATTATTGGAGAAGTGAATAATATTAGATTGTGTGAAAAATACACTCGACTGGTTTGATTTCTTTGTGAAAGCAATTTACTGATATAACTTACATTGTTAACCCA
>MSTRG.13360.5 Scaffold1274 257577-258621
GTCATATAAAATTATCGTACATATGTTTTTTTCTCTTCAAATTATATATGTCACAGCATACTTTATATCATTTTAAAATATTTTTGTCCTTTCAATTTCTAGAGATCTTTAATTGAAAAACAAATGGGAAAGCAGACTAAAGCCTCGTTTGGGAACATGCTAATTTAGTAACTTTTTAGCTATTTGGCTAAAAAGGTAGGTAAAAAAAACTTGTATGTTTGGGATGACTTTTTGGCTAATTACGAAAAGATGTGCAAAAAGTAGAGAGAAAAGAGAATCTTTGACTTTTTGGTATGGGTTGTTAGCTTTTGGCTAATTTAGTAACTTTTTGACTAATTGGCTAAAATAGCCTCTTGCCAAACGAGGCCTAAATATTCACAATTACTCTTTAAATGTAAGCTGCTACTATTCAATCATTATTCCTACAATTATATTTTTTCCTTCTAGGTTTATATGGTATTTTACTACTTTCTTTCTCAAAAGCATTGCTCGGGTGCACTGCTAGTTATCTGCTTAATTTCATCAAAATACAAGTCATTTAAAATTAGTGAATATGGTGAAATCTTGTTGAAATATAGAGCCTTGTATATATTTTCGTTATTGATCATGATTTTTTCATTTGCACCTGTGATAAAACCTTGCCAATGCACAGCTGGGCGCTTTAAAATGGATCTTACGCCCCGAAAGGCTTCGATAAAGTTCATGATCCAAGAAGAACTTACCAAACTAGCTGATGAGGCAGATGATGAAGAAGATGAAGGTGATACCGAGAAAGATAAGACCCAACCTTCCGGTCAAGGTGTTGAGGCTTGA
>MSTRG.120284.2 Scaffold5623 30443-35208
TACACTGTCTATACAGTTAAAGAAGAAAACAAAAACAAAAAAACCACCTTTCATTTCCATAACAACTTACAAAATCCATATTTGACCAAAAAGTCATCCCAGATGACCGCAAAATAAAGCTATCGCACTCAATCTTCACAAAAAGTACAACTAAAGGCGGCTCACGCTTATTCGAGGCCCAAAGAAAAAAATGTAAATGGGGCCTCTTATAATTTCTTACACTGTAATTTTATTTTTTATATTATAATTTTTATTTAAAATTCATATCAATATCCCTAAACTTCACAATCAAAATAATTTTCTTAAGCTTGACAATAGGGCTCGGCGGGCCGAAATCGTGTAACAATCACTAGAAGGCCCGGGAAACACCTCGAACATCTCAGGAGGGACCAATTTGAGTTGTGAAAACTTAAAGAACAGGCGCGGGACTCTCGATTTGAAAACTAGGTCAGAAAATACACTTTTCTAACGCTTAAGCTTGGAAGTAAGCCATCGGGGGGCCAAAATCATGTAACAGTCGCAAGGAGTGCCGGGAACACCTCAAACACCTCAGGTGTGACCAACGCAAGCTGTGAAAACTTAAGGAACTAGCACGGGACTCCCGGTTTGAAAACTAAGTTGGAAAGAGACAGTTTTTCCAAACTTAAGCTTGGAAATAGGACACC
>MSTRG.141987.1 Scaffold8043 160812-166551
AGGGATTTCCGTCGCAAGGATTTTGAAGGAAACACTGCTCTGCATCTTTCCACTCCAGCAAATACAAAACAACCCCAGGTAAATTACTTTTATGGGAAATTACAAAAAAAAAAAAAAAAAAAATCATCTTAAGTTTTTTATTTTATCAATTTAAATGTTAACGTTTTGATTTATTTTTATTCTAAATTATTTGTTTAATTTTTAGGTCAAATCCACAATATTTTTTTTTAAGTTATTAAAGTAAATGTAGATTTACATAAACAAAAAGCTAGATTAAGTTTATATTTAACTTAATCTAGGAAATGATAAATAGGTTTCCTCTAATTTTGTAGCAAGGCTAGAGAGGAATGTCTCAAATTTTGTGCCCTCATCTGTTGTCTTTAGACCATCTCCAAATTTAAATTTGGTGAAAATACAATTTTTAACTCTCAAATGATTTCAACGATATTAAATTGAGAATATCTTAAATCTTGCACCAAATGAGGATCTGGCTTAGCTCATCAAAACAATATCAAATTGAGACCATCTGCAATGCTTTACCAAACCTTGCATCAGATTTGAAATTTGGTGAAAAAGTTACTTTTTACGGCTTCAATAGTTTCATCAAATTGGTACCAAAACGAGAA
>MSTRG.25032.1 Scaffold1562 571188-576815
CTTGTAATGGCAGTACCAGTGCTGATGGTTTTCCATGTTAACCATTTGATGACACTTGATCTATCCACTTTCATCGTGATGCCACCAAATGCTCCATAACATGATAAAATTAAAAATGCCAAAGAGGGGCTGAAGCTATAACCTCTTATGGAGACTATAGACATATGGTGAAATCAAATTTCAATAAAATTTTAATTCACACCAAACCATAAAATGCTGCAGTTACCCAACATTGATGAATAAAATTCGTACCAAACATTGCCACTTATTGCATGAAATCCTGTATCAACAAAACTTACTTTTAGCTTACTCTGGATTTATCAAAAAATATGCAAATTTAGCCTAATAAAAAACGCAAATTCCACTAAACACCATGTTAGCTTGATATATATTTTTGGACCCATTTCCTAACATGACTTTTGGAACAATTATTGACTTAACATGGCTAGATCTCTAGTCCTTGAGGACCCTGGTTTCAAGTCTTGTTGCCCTGCTATCTCTATCATTGTGCAATCTGTTTCGCCTGTCTTTGTGCACCTTGTTTCTTGGGCTGCTTGTAGTGAAGCCTAAATACTAAAGTAATGTAAAGTATATGAGTGTGAGGTCACCCTCGCCTTAACGTTCTGTTTGGTTGATTGGAATGAGACAGAATGGAATGGAATGATCATTTTCTAAGCTCTTCTATGGAATGACATTTCCTTATAATGGTGAATGATGATTCCGTTTGCAATATAATTTTTTTAATCAACCAAAAATGGGAATGGACAATTTGAGGGAATGGCATTTCATTCCATTGAACCAATCACTACCTAACAGTTTGTTTTTGGTATTGAATTCTATGCAAGACCATGTAACACAGTAACAAAGCTCAAATACCTAGGATAGGTAGGGTGTGTGTCCCTGACCTGCACGCGGCAGGTGCTACCGAGTAAGCACGTTGTGCTTGAAGAAGTGTGTGAGTCTCACATCGCCTAAGTAGGCACCCAAGTAATGTGAACCACATAACCCAGAGGGCACCCTCACTGGTATCGCACATGAAGGAATATTAACTTGATATATTTGCACCAAATTCGCAACATTTTCAAGTTTTTAGAACAAATTGGTGACTTAACAAGCCATAAATGTAGCAATTACC
>MSTRG.114007.1 Scaffold5003 927158-928575
TTTTATTGTGCGTGTGATTCAAAGGGGGAGAGTCTTTCCTCATCATATATTTTTTTCATGATTATTATTATTTAAAAGTTTGGTAATTACACTTTAGTCTCTTAAAATTGTCCTGAAAATACATCGCCTCTTATTATTTGGATTGAGCATATGTTGGATTCATAAAATTCTCTAATGTGTTCTAGTCCAGCTGATCAAAACCAAAAAAAAATGTTCCAGTTCATAAAGTAACCAGAATCGCATGGTATTTTTGTTTGAAAGATTGGATTAGTTTTTTAATTTTTAGAGTGTCGACAAGTCATAAAAGTTTAACAAAGCATACACTGTGTTACTTGTATGATCCCTGTGAATGACCATAACCAGCATGAT
>MSTRG.48760.6 Scaffold216 595939-603635
AAAACAACTATTTGCAACAAGCAAAAACTTGTGAGCCTACTATTGGGAACCCACTCAGCCCAATTTACCTGTGAGCCGAAGCAAGAACTCTTATTTCCCCCGAATCTGATTGTGTAAAACTTGCCCTAGACTCAAACCAAACCAAATCTGATTTCGCTCTAGACTCACAAATCTGATTTCCCATGGTGGAAGTGTGCTGGGTTCTCCTCATCCATTCTCATTTCCCCCAAATCTGATTTCGCTCGATCGTGTCTGAGTAAGAGAATCGGATTTCCCTCTCTCGATTTCTCTCTATAGATCACCATGGTCTTCTGAAGAAGAGATCTCCAACGGTAGTCTGATTCTGGAAACAAGCTTTGGTTCGAATCAATCCTTCCTCATCTGCTACAGGTACAAGCTTAACCATTCAATTCTTAATTGACGAGTTTTACGTTTTATAGAATTGAGAAATCCGCAATTCTGTCAATACTATAGCCTCTTTCAATTTTAAGAATTTTACTGTAATTTGTGACTCAAACCAAACCAAATCTGATTTCGCTCTAGACTCACAAATCTGATTTCCCATGGTGGAAGTGTGCTGGGTTCTCCTCATCCATTCTCATTTCCCCCAAATCTGATTTCGCTCGATCGTGTCTGAGTAAGAGAATCGGATTTCCCTCTCTCGATTTCTCTCTATAGATCACCATGGTCTTCTGAAGAAGAGATCTCCAACGGTAGTCTGATTCTGGAAACAAGCTTTGGTTCGAATCAATCCTTCCTCATCTGCTACAGATTCCAACGCTTCACCCAAAAAATTTCAGAGAGAGAGAGAGAGGAAGAGAAAGGGGAAGGGGGAAAAAGAAGAGGAAGAAGAAATACCAACTGTTCGCAGTGTGCGGTGTGGTACTGTCGCTGATCAGAGATGGGTGCTCGTGTGCAACGGTGGCTGGTCGGAGATGGGTGCTCCTTGCGACGGTGGCAGATAGCTCTCTATGGAATGAGAGAAACAGAGAGATGAGTGAGGAGAGAGAAGAGTATGAGCGTGAGATATTTTATATGAATGGTTATTGGCAACTAAAATTTTTTAGTCGCTGAAAGTATTTTATAAATCCCTCCAACATATTTGAAATGTCTCCCTCAAAAAATTTTAGTTCTTTGGCAACTAAATTTTTTTTTGTTGCTGAAAATAAACTTTTGGTGACCAAACTTTTGGTCGCCAAAGCTAAAAAATAATTTTTTATTTTCCATTCGGCGACTAAATAGTTTTAGTAGCCAAAACTCAATATACGGCAACTAAAATTCTTTTTTGTCGCTGGCAACCAAGTTTTGGTCGCCAAAGGTAAAAAAATAATTTTTTATTTTCCATTCGGTGACTAAATGGTTTTAGTAGCCTAAACTCAATATACGGTGACTAAAATTCTTTTTTGTTGCTAATTCTGGCATTTTTAGTAACTAAATTTTTTTTAGTCGCCAATAACCAATATACCTTGACTTCAAAAAATTAGTAGCTAAATATTTTACTTTTGCCGACTAGAAAAATTTTTGGTCACCAATTCTGCAACTTTTGGCGACTAAATTTTTTTTAGTTGTCAATTTTGGTCGCCGAATGTGCATTTTGTTGTAGTTTTTTGAGTGCTGTTGATGAATTTTTACAAGAGAATCTTGCTTACAAATTTGTGAATTTCCGGAGGAACCCCTTCCACCCAAGCATGGAAATTATTCACATGGAGTGCTTTGCAAGCCAAACCAACCATATTGCCAGTCCTCAACACATGGGTGCATTTTGCAGCTGAAAAACCAGACAAATTTTCTCGCACATTAGCAGCCAATAGCCCAACATGAGAGAGGTGAAGATTAGTTGATTGAATTGCTTTAATCACATCGAGAGTCACCTTCTAAAATAATGTTAATAAGCCCTAGGGTTTTTGAAAGGGTTTTTTTAAGTAGTGTAATTTAGAATTTTTGATTTGTTTATTATTTGGATGTATCTTGAAGGGTAATTTAAGGAAAAAATATATGATATATTGAGTGTAAATTATAACCCTAAATAATTAAAAAGAATGTACTAACAAATTATGCGTACTTAATAATTTTTTGGGTGAAAATAAAAACCTCCTAATCTGTGGTGCAATGCGTTGGTCGGGAAAAATCTTATTCAAATTGGGAGCCA
>MSTRG.6328.1 Scaffold1128 2339221-2339847
TTCTATGAGTGATATAGTTATCAAAATACTTTTAACAAATTGGTGGAATCTGTCGAGGAGATGGATCAGCAAGATGAAGATAAGAAAGAGGAGTATAGACTCCTTTGGCTGAAGCAAAAGAAACCTTGCTAATGGGATAGAAGTTGCAGATAGATTTCGTTGATAGAGAAGACATCTTGCAAAAGGATTTTATCGAGTTGGAGATGAGCAAAAAGCCAAGAAGTGGGATGGTGTTTGTCCTGGGTGTGAAAAAGTCTTTGATTGATTAAAGTGAGTGGGGTAAGGGTTGTGTATAATATCATAAAATTCGTTAAAATGTGGGGTGCACTAAATAATTATTAGAAGGGTAATGGGATGTGATGGAAAGTAGGGGAATGGTGTTTGTCCTGTGTGTGAAAAAGTCTTTGATTGATTAAAGTGAGTGTTGTAAGGGTTGTGTATAATGTCGTA
>MSTRG.77497.1 Scaffold3140 282793-295111
TAATAATTCAAATAATTTTATAATTATATAGGAGAGTAGTTAGGGGTTTAATATTTTCAGTTAATTATATTAAATAAAAAATTCTAATAAAAGAATATTTGTAATTTTTTAAATTATAAGAAATTATCTGCATTTTAAGTAAATCTCGAAAGTGTATATGTAATTTGTCCTAATTTTTTTTATAAGAATAACTTTTATTTATATATGTTTATATCTATAAAAAGCTCTTACCTGTTTGAGGCTTGTTCTTTTTTCCTGATTTCCCCTCAGATTTATAGCCATTCTGAAGGAAGGTAAAATGTCCAAAGGCTATTAACTTTATTACAATGGATGCTAGGTATACCCGTTGTTACATATTTATTTTGTTTTATTGGAAAAGTTTATATGTTTTCAAAAATAATTTTAAAATAGTGATAAATTTTACTAATTTTAATAA
>MSTRG.142601.3 Scaffold814 522214-525400
ATTTGAAATAAATTCAAAAGATTAGGGTTTCAATTGATAAAATTAAAAGCTCAAAATTTATTTTGTTACAAGGCTTATACTTTTTTTTTGTAATTTCCCCAATAATAAATGAACAAGAACAAGTGGAGGTGGAGCTGGAACATTTGTGTTCAAAAAATATGATAGAATCGGTAAACCAATCCAATCAGGTCCAAATTACCAGTTTGGTCTTGGTTTTTTTTTAACTTCGGTTCTAGTTCTAGTTTGGAGATGATAGAACCATACCGAACTGTGATGTATTTGTTTATTAATTTCTACTATTTTTGTATTTGAAAATAAGATAGTAGAAGCAATTAGTGAGCTTCAAACACTAGTCTTGATTGTGAAATCAACTAGCTTCAACCAACTCAACCATGCTGGTTGTTTGTTTGTTTACTATTATAAAATATATATCATATCTCCTAATATATAAAAATTTGAGAACCATAGAACAGAATAGAACCGAACCAAACCGGTTTCTATGGTTTGGTGTTGCTCCGGTTACATAAGTTAATGGTTTGGTTGCGGTTCTACTTTCTTGGAACCGTAAGGATTGGTTTGGTTTTTGTCTGATCCATGAACACCCCTAATATAAAGGCAACCCACTTGTTTTGAATGGGTATTGAGCAGTCTATTTAGAAATTGGGTTGTACTAAGATTACAAGGGGTTTACAAGAATTTAATCTGATTAAAAGAAGGTTTGGGATTTGGCTCTGCAAAGTTGAACCAACAAATAATATTATTTTTAATCTGTTCTTACGTTTTACCAGTAGTAATAAATATGATTGGTTTTTCATATAAATTTGGGTAAATTACACTTTTCCCCCTTAAGTTTCACTATTTTTTTACTTTGGCCCTTGATATTTCTAATTTTTCCCAATTTTCTCTAAAAACAAATTCTCATCCAATTTTAAACAGAATTTATCTTTGGCAGCCATGTGATGCCTTGAGGCATAAAACGTACTTCACTACAATCCAAACCCAAAAATCCCAAACCCAAATCCAAATGCAAATCAAAACCCAAAATTCAAAACCCAACCCCAACCCATTTTCTCTCCACTTCCTAAGCTCTGCTATTCTTTCTCTTAACTCCTCTCCTCCTCCATCACCTGTTTCCAGAATCCCCCGCCACTACTCCCTTCCACCACCCTCCAGCCCTTGAACCCCATCCTGAGACCTCCCTCTGTCTTTCGCCCTCCAGGCGACATCCCTCTTCAGTTTCCTAGCCTACAACCTCCACGTACTACTGTCCCTCTCGGCCCTCCCCCCACCCCGCCTTGTTCTTCTTGTCTCATAGAAGCTCTCTCGCATTGTGGTGATGGTCTTGATCGCCGAGAAGCTTGTAGAAGCAATTGGTGTTGTGGATCTGGTGGTCGTGGATCTTCTTGCAGTCACTGCTTTGTGATCCAAACCCGAATTCCCCCGCAAATTCTGAAGCAGCTCATATGTTCAGGGAAAAAAAACCTGAATTGTGGGGCAGAGCTGGACTGCTGACTAAAAGTCCAATTAAAAGCATCACCCCCGCCCACCAAACCAAAAATAAAGTCAGGAAGTGGTGGTAGTGGTGGCTTCTGCAAACCTTTGTGCTTAATTATGTAACATGCTTTGTGTGTATTGCTTTTAGAGAATTGCTTTGAAGGAGTTGTTTCTGCTTTTAGAAAGCTCTGGTTGAAGTCTTGATACTCCACTCCTGATTCTTCTTTTTCATCAAGTTTCATGTGTCCATCCAGTTTGTAGCCATTTGTATAGGAAGTATTGTTGTGTCCTCTTGAACCATTGGCAGTGGACTTAGTACTTTGCTTGGGGGCAATCAGAAAGAGCTTTTCTAGTGTAATGATGATTTAAACAGTATTTGATCAATAAGAGAGCTTTTCTCCAATGATGAGGTTTGAAGATTGCTATTTCTAAATATTAGCATCAAGTTAAAATTTTCTTCTCTAATTGGCTGGTTAAAAGGCTTGCTATATTTTAGCAATGCTATACTTTGTGCCAGCTCAACAAAGTTGTCCAAAAACATTATTCATCTTCCCAACTCTATTTCAGAAACATGTTCATCTTCCCGCAACAAAAATTGTAGAAATTAACAGAAATTTTTTTGAAACAATTTCAGAAATCGGCAAATAACTCGACGAAACTCCAAAAATAGAATAAAATAAAATAAAAGGATCATCA
>MSTRG.62218.1 Scaffold2594 884502-887838
CCGGAGCATAAATTGAAGTAAAGCATCACATATAAAAAGGTCAAGAAGATTAATCAAAAGATTTTAGTTGAGAACAAAATAATCTCATACACAGAATAACAAAATATATAATAATTTTTACTTCTAAGCGCAGTATTGTTTTTTTATAACTAAATTTTATTTAAAGGTGGCACCAAGAGTGGTGCAACCTCTGTATACAGGATGTATACAAAGAAAGCCTAAAACCCATTACTAAAACAGAGCTCTCATATACTAAGCACAGTATTATCACTGAAAACAAGATGCACCTAAAAC
>MSTRG.96569.1 Scaffold3997 201367-254255
AACCGACCCAACTGGAGAAGAGCGAGAGACAGGGAAGAATTCTCTTTTATGGTTGTACAAGGTTATTGTTTGTATCATCTTCAGAGCCAGCTGAATAGTGGTCACATCTTACAACCTTCGTTCCAAGTTTTGTCTTTCTGCAATTATGGGCTGAGAGGAAGACAATTTCTTTGATCTCTAAAGTTATCAGAGGATGATCTTGCTGATCCTGACCCAGATCCTGACCCAGCTCCATTGTTTGTATCATCCTCTAAGCCAGTTGAATGTATTGCAATCTTTGCTCCATATATTGGCTTTCTGCGATCATGGACTTCAATGGGGAGAGATAATATCATCCAAGTCCAAAAAGCACATGAATGGTCAACCGTGACAAATTTTCAGAGACAAGCCTGAAGACCATAGTCAAATGAAGCAGTTAGTTGGCATGAGCATGGGCAGATCCATGATTCTAAATTGTCGTAAAACTTTAAAAGATAATATTAATGAGGAGATGTCTGTTCTTGTAATATTGTGATTCTGATTTAAAGCCTTCTCTTGATTGAGAAGGGCAATTTAGTTTTCAATTTCTATTTTTTTT
>MSTRG.36617.9 Scaffold183 661108-701121
TATAACATTGCCTGCCTCTTTGGATTCCTGCTCATGAATACCAATCACACCTCCCCCTATCTTTCACAGACGTCCTCCACTCTCTCTCTCTCTCTTCTTGGTTTACCTATGGCAACTTTGTTGAAATTCGAGTGCACTATTTGATCAAATACAAGGTAGATCAGTCGACACAACCAGCGAGAAAGAGAAAGCGCCATCAAGATCGGTATCCTCTTCAAATTTTTCCTCCCTTTCCTTGGCATATCTAGCGTTTCTTAGTTCATTGTTTGTTTATTTTTTTGTCGATTTTTCTTTTTGGGCATTTTTGTTTTGTTTGTGTCTCTTTGTATGCATACACTATGTTCTGTAAAATGCCTCACATGTCTTTACATTTTTTTTCTAAAATGAGTCTCCAAAATGCCTCAAAATTTTTATTTGGGTTTTCGTTGGGTGTCTAACATATGCAACATGAGAGTGTAATTTTTTGGGGGGTAATCCAATGGCCCCATCAGCATAAGACTCAAGAACAGAATGTTTACAAAAGAGATTAAAATTTGAATTATCAAAGCCCGTGTTTTCAGAAATAGAAGTATGGAAACTATTTCTTTCTCGTTGTAATCTACTGATTGAAAATTCGTCCTGATTACTATTTCTTTTGTTGGGTGGGTGGGTGAGGGGAAGGGGGATTCAATTTTCAAGATATTAGTCTCCTTTCCTTTTTGTTCTTTTTGGTGAATGATCGGTTAAGGCCGTTGATCTAATTACTGAACACGCATGCTGTCACCCCATCTGCAAAAATATGGGCTGATCTTATATTGAAGCAGCCAATTAAAATGTTGATCTAATGCTTCATACCACTCCTTACTTCCTCAAATCTTCAATTAGGGTATCAGATATCTAAATACAATTAAGGAAGTCTGCACTCATCTACTTATACTGACAGAATGGACTCTCAAATCTCTAATATTATAATAAATAAAAACCATAAAATTCTTAATACAGCATAACATTCTTTTAAAGTGTTCACATCCAAAAAACTATTTCTGAATTAATAAATTTATTGTAGCATATTCATACTAGTATATTACAGTCTCTCCTTGAGCAATCAATGTCAAGGTATGACATGTGACCGCTCAGATTTTACCAAAATATTAAGCAAACTTAATGGAAAAGTCTATATTTGGGGGAAATTATTAAGAACTGGACCAATTTGTAATAATTCTCTACAACTCTTTTTGTATGAAACTTTGTGTTTGCATGATGTTATGTTATTACATGATCAAACATGACAACAAATTTTGTTTATGGACTTGTTTAAATGAATTTACTCAACAAGTAGATTTATCTGCATCATGGCTCTTCATTCATAAGTATCTCAACCTTAAGTGGTGTTATGACCACCTTGAAATTTGGTAACTACAAGCTTTTTGGAATATAATGTGCCTATTACTACCAAAACATAAATAGAACATGTACTAGAAAATGTCTCTAGCTCTGTCAGCAAAGCTTGTTAGAGATGGAATAGAGACTTGGGTTCTAGTCAAGTCACCCTTTGAGCTTGAACATCATCTCGTGAACTGAGTTTATGTTGGCCTTCTATGACCTGAGTTTCTGGATCAGATATAGGGGGTTCTGAAATGGACAGTAGGAGAATTACTACCAGTCCTTGGCTGTGATGACCGAGAAAGGTTTGATTGTGTTTCTCATTTACATTATGTAATTTGTTTCTCATTTCCAGTCTAAATTGTTTCTCATTTACTTCTCACAACCAGGAATATTGCCTCAATTAAAATTTGTCTCTTTCCCCCTCTATATTTTGTGTCATCATGCATACACCATGTTAGGTAAAAGCCTTAATTAAAATAGTTTATTTTCTTTTGGTTAAACCAGTTGTTTATATAATTCTAACTTTTTGTTGTTCAAATAGTGAGTGAATCTATTATAACGGACCAAGTAAATGACTAAACAACCTTTCCAAAATGTAGTGTGGTGGTAAGTTTAGCAAAAATAGAGGTATATTCAAATGGGTAATGCAAACAGTGGGAGTTGGATATTATTTTTAGTAGGCAATTTTTAAGGAGTTGATTTTGGATAATGGATAATGGAGCTTGCTTACTTATATTTTCTACTCTTTAGAATAACATAGGCACAAATTTATTAAGATCATTTGAAACTTTCATTTGCCTCTAAGATTAAAAATTTAAAACTTCCACTCTCTCTATGTGATGCTTTTAATTTTATTTTTGGAGATGTAGGCCCCCAAAGTCCATCAAGGACCAAGGTTGAGAGCTGTGAGTTTTCTCTATTCCAACTGCGCCTTCTAGTAAGTTTCTCCTTTATCCTTTATTCCCAATTTTACTACTTTAAATTAAGTTCCATTTGGATACTCTCTCTCATGCTTTTGTGTTTTTGTGGGTATGCTTTCTTTCATATTTGTCAATTGATTTGGTAAGCAATTTCATCAAAAAAAAATTTTGTTAACCAATGCTTTTATCAATTGATGTCATGAAATGGTTATGTAATATATCTTTTTTTGTTTCAAATTAGAAGGTACTCCCTATGATTTTATTTTTCCTTTAAAATGAGCGGTTTCTTCGCTACATAGCCGTGGTGTGTCAACCTCTTAAGCAATTTCGGAGTTCATATTAATTCAAACCATGGACAATATCAATATCAACATCAATATTGAGGCCTAATTTTTACTTATTATTATATCTAATTTCTTCATAATAAAATGCTTTTGTATCATGTTTAACAGCTGTATAAACGGGTAATATTAGATCCATATACCAATTTTTTTTTTAATTTAATCTGCATTTTCTT
>MSTRG.135686.1 Scaffold7172 386234-386765
CTCCTAATACATTGTGGTTTGGTGAGAGGAGTTCGGAGGGAGGTGGGGTGGGAAAAAGGAAGAGGAAGACATCAGTTTTAGCTACCTTTAGGTGTTATGTTGATGATTTGGGAGAAGGATGTTCAGGGGACCGTTCGTACAAATTGACAAGTTCTTTCTTGGCTATATTCTATAGTTGCCCCTAACTTGGATCTATTTCTGGATTCTGCTGAAGCTGTTGCATCTCCTTTTGAAGCATTTTCT
>MSTRG.101070.1 Scaffold420 950247-966456
CATGCGTGCATTCATCCCTCTTCCCGATGCCTCTTTACTGCTTTTCTTAGCTTAATTGATTCGTTAGTTAGTTAAGTGTTGTAAATATTTAATTAGCTTGTAGGTTAATTAATTTGTATTATTCTTTCGGTCCCTCCGAAAGAGGGCATAATTGTGTAATAAGCGTGCGTGTGTGTGATGCATGTCTTCCAACCCCCACTTCTTTCTCCCTTTTACTTACCTGCTTACGATGGTTAGATTAGGGCTTGTTTCAATTAGCACACTGATGCTCGCATGTTTGCATTCATTCATATGTCTAGCATGCACCGGGCTCGGCGCATCATACTAATTGCATTGTATTTCAATTCCAAAATCGAATACGTGTATCAATTGTTGCATTTCATATGCCATCTTAGAAAAGCCGAGCCTATCTTAGTTGCATTCTTGCATGTGTTGCATTAGCCATCTCAGCATAGTTAGGATTCATTCATGTTTTCTAATTAGCTTCTTTCTTTGGCTCGGAGTACTCAGTAAGTGTTTATGCTTTAGCATCCTTCCATGTATGTGAGTGTTTGCCATGATAGCATGCTTACCATGAGGCTATTTGCTTATGTGATATAACTGCCTGAATGCCTGTGGGTGAAGGGTGAGTTACTTGAATTAGAACAATTCATTGATTGCGAGTTTTAAGCCCACTTGAGGGTGGCAAAAATCTACATTTCAGCCTACTTGCGAGTAACAAACCATTTTCAAAACAAACTTGAAGTGTTTTGTTCCAAATTCAAGCGACCCAGTCTATACTTGTATGCTGTGTGCATCACATAGTAAATCTAGGCTAATAACCGGAATAAGAGCACATAATGTTTTCAAAACTCGATATCATGGTTAGTAGAGGCCTATCTTCGGATTGGACGAGTGGGGGTGCTCATAGCTGACCTTCCCCAATCGTACCCAAGTTCCCGAGCCGAG
>MSTRG.2629.5 Scaffold1051 1525814-1528130
AATCTCTTCTAAACTGTTCTATATTTTCTCTTGTGTTGGTGTGAATAGGTGATGCTTTTGGTGTTGGGAGGACTATATTTTCTTTTAGGTAAGAAACATCCTTTTGTGTGTGTGTGTGTGTGTGTGTTTTTTTCCTACCCTTGATAAGCATGACACTGCTATGAAAAGAGTAGAGTTGCAATTCCTGGGATTGAGGTAACATGGATCCCTATGTCATCCTGACTAGTCGTACTCGGGAGCAAAAAAGCAATGTTGCATCAGGGGTCTAGGCAAAACCAATCTGATGTTTTCAAGGTTTCTACCCAGCTGAATGAGGTAAGCTACACATGTTTAAAGAATCTTTACACTTCACTTTCATCTCTTCTTTCTATTCTCCCTTTTGTATATTGATGTGGCCTTTTTGCTCAAATCTTTCCCCCACATCTAAGGTTACTACCAAGAAATCTTCAAATTCTGCAGCAGTTCCCAAGGCAAAGTCAGAGGAACCTACAAAAGAATCTCCTACTCAAAATACTGTTCCAGATGTGTCATCCATTTCAGCATTTATGACCCAAGTGGCATACATTGTTAAGTGCGTTAAAACAACC
>MSTRG.4031.1 Scaffold10780 116883-119022
AGAGAGAGAGAGAGGTGCTGGTGGTGGTGGGGTTTGGATGGGTGGCGGAGTGACAGGGTGAGGTTAGGTTGGGGAGGGAGATTCATTGAATGGTGGTGGGGAGGGGTTTGGAAACATCGGAGGTGGGAAGGGAATAGGTTTGTTGGGGAGGAAAAAGGGAGGCTAGAGAAGGAGGTCACCGGTGGAGAGAGTTATTATCAGGGGAGGAAGGTTGTAGTGGCGGGGTTGCAAGTGGTAGGGTTGGTATTATGGTGGGCTTTGAAAGAGAAAAGGAAAGGGAGCAATTTTGGTTGTGAGGTCTAAAGAAATAGGGGGTTCCATAGAAGAAATTGGG
>MSTRG.129324.1 Scaffold651 1141897-1142178
CCTGCAATTGCAAATTGTAAAAAGGCACAAGAAAGAAGGAGAGATCAGCGAAATGAATGTGATTCAGTGAAGAAACAAATAAATAAGAGGTGATGCAGTGAAGAAATAAATAAATAAGACTAATGCCCCAAAATGGATATGATTTAGTGAAGAAAAAAAATAAATAAGAGGTGATTCAGTGAAGAAATAAATAAATAAGAGGTGATTCAGTGAAGAAATAAATAAATA
>MSTRG.25340.1 Scaffold157 485028-485319
TGAAGAGTCAGTGTGATGAGAAAATGTTTGATTTTTGTCTTTTATCAGAAATTTCTTGGAGAAATGCAAAATATGGTCAAAGAATTCAACAACTTAGTTTTTTCAAGTTTTTATTTTTTATTTTTTAATATATGTAAGCACAGTTAAAAACTTTTTACTAATTCCTTTGTATATACTTTTTGAACATTTAACTTTTATTTATGAAATATATGAC
>MSTRG.30217.1 Scaffold1690 989690-992822
TGATTGTATTATTGATTGATATTAATGTTCTATTTATTACAATGATTCATGATTCCTATATATAGAAGAGGGTGAGTGTGTAGTAGGTAAGGAGTAGGTGAAGTGGAGGTGGTAGTGGTGTAGTGGGTTAGGTTTAGTGGAGTAGGTGAGGTGGTAGTGGTGTAGTGGGTTAGGTTTAGTGGAGTAGGTTTAAGTGGGTGAAGTAGGTGATAGGTTTTAACAGTATA
>MSTRG.15303.5 Scaffold1318 1167791-1168947
CCAACCGCCTATTCCAGTTGATCAAGTAAAACCATGGAATGAATATGACTATGAAGGAGGTAAAACAATATTATATAATTGTTGATTTCTATTTCCTTGAAATATGTTTATAATTAGGTTGTTCTTATGCGGAATTAGAGGGTTCTCCTAATATGCGTGGGAGAGGACGTGGTAGTCAAGGACGGAGTAGAGGCCGAGGCAGAGGTAACATAGTTTGTATTGTATTCCACCGGTTTTGCTTTGGGAAATAATGTTTATGGTGCCTTTAAATAACTTCGTTCTGTGCCGGCTTTTTCATGTGCTACAATCAAAAGATGAACAAGGAAAAGAGTTTTATCATGAATTATGAATTATTAAATTCTTTAACCACACACTAACACGCCTCACTTATTCACTCACACCTAAACTTATATAATACACTAGACACACTCTAAAAGTGCACTCAAACACTGACATCACTTTACACAACACTGAACACACTTATTTGTGATTGACTTACACACAAGACTTAAGACACCTTATACTAGATCCCTCTTGTATTGGATGATACTCAATACAAGGGCTATCATCACATTTATACTAGTTCAAGACTGTTAAGAAGTTTCTAGGAGCAAATCTCATCTACAAATTGAGTTAGGTAAAATTAGTAGTTGGCAAACACTGAAGTTTGAGTTGGTAAAGTGAGTGATGAGGAATTTGATGGTAAGTGATGGGTGGACTACATTGAAACAATGGTTGACATCTGATGACTTGTTGCAATTAGAAGATGAGGAACGAAAATGAAAGCTGGGTGATAAGTGTAATTTTACCCTTAATTTGATGTTTATAAAAATCCATAAGCTTATACACTTAACTAAGTAGGGCTGCCATTGTGTAGCACTTAGTACACATGGCACAATCAAACGGCTAATTCTATATTGCTTTGAAATGTATAAGATTTATTGGTTAACTAACAAGGCACTTGATCTACCAAATTGGTCAAATTTTTATTGAGATCAAATGTATAAGTTGTTTTGAAGTCAAGTTTTACTGTAGTTGATCTATGAAGTGGGGTCTTACCAGATCCTAGCATGAAGTGGGGGATCCATGCATTGGAAGACTTTCTTGTTTCTAAAAGCAATTCCAA
>MSTRG.150730.16 Scaffold920 410421-419605
CCTGTGCCCATTCGTTAAGTTTTCACAACTCAAATCGGCCCCTCCTGAGGTGTTCGAGGTGTTCCCCGGGCCTTCTCGTGACTGTTACGCGATTTCGGCCCGCCGAGGCATGTTTTCAAGCTTAAGTGTGAAAAAAGTACCTTTTCCGACCTAGTTTTCAAATCGCAAGTCCCACGCTAGTTCCGTAAGATTCCATAACTTAAATTGGTTTCTCCCGAGGTGTTGGAGGTGTTCCACGGGCCTTCTCGGTACTGTTACAGGATTTTTTTTTCTCCCGATGGCCTATTTTCAAACTTAAGTGTTTAGGAAGTGCATTT
>MSTRG.108567.1 Scaffold4609 621519-628432
CAAATTGAAGATATAAGGAGTTAAAGACACCCCTACCTCAAAATTGGAAGCAAGGAAGCTAGATCAGGAGCATTCTTTCAAAAATCCAAAATCTAATCGGTTGAAAATGTTGATCTTCCCTTGTTCTTCATATTTGATGCAAGATCCATGGTGGATTTTTGGTAAAAATGGATGAAATCAAAGTTTTGAGGGCTAGGTTTTTGGACATGGAGG
>MSTRG.136454.5 Scaffold7286 1297812-1308451
AGGCCTCGTTTGGCAAGAGGCTATTTTAGCCAATTAGTCAAAAAGTTACTAAATTAGCCAAAAAGCCAACAACCCATACCAAAAAGTCAAAGATTCTCTTTTCTCTCTACTTTTTGCACATCTTTTCATAATTAGCCAAAAAGTCATCCCAAACATACAAGTTTTTTTACCTACCTTTTTAGCCAAATAGCCAAAAAGTTACTAAATTAGCCTGTTCCCAAACGAGGCCTTGCAAACCCCAAGGGGTTGGCCTGGTGGCAAGGCCTTGGATCTTGGGAGTTTGCTCCTTCCAAGGTTTAGGGATCGAAATCTCTTAAGTGCTAACAATTCCTTGGGGCCATCAGATTGGTGGAAAATCTTTGAATTAACTGTGGTGCACTTGCGAAAAACTCCTTGCCGAGGGCTTGTGCGCCGCTGGGGATTGGTCGGGTTTTGATCCGGACACTCCAATGATAATAAAAAAAAAAAAAAAATTGGCCTTCTTGCAACTTAATCACAGTATGATTCCTTGCATTGTATTACTCCAGCCATTGCATAGGTCATCATAAGTATTACCAATACGAGTTGAGCTAGGCTTGTGAGCTTATGAAAGTGTCACAAACCAAGCCTGAATATGCATTGCTGTGCTCATCGTGAACACAATCTGAGGCCGAACATACATTAAACTGACTTAGCCAAGCTCAAACACCTTAGTGCTTGGCTCGGCTTGGCTCATTTGCAGCATTAATCCTCTGACACATCATGCAGTTTTCTCTTCATTGGGTTCAAGTTTGATGCCCAAAGCTTATCTTGACTCCATTATTTCTGCCCTTGAAATCCTTTGGATAAAATAAACTTAAAAGGGAACAAATGACAAAATCCACATTATGTCAAATTTGTATATTATTTGCATTTTTGTTCCACTATTATGTGTTTCTTTGTAAACAATGCACATCTTATTCCTTCAATGCGTAAATACATGATATGGTGTATCTTCTACTATGTCAGAAACTTAGAAACCCTAAACTATCCATATTGCTGCACATGCCTTAGTACTATGGATACTTTTTTTTTTTGAGCTATGTTTGTGAGAGAGGATTTTTGGAGGTTGTTTGAGGACTGTTCCTGCGTGACATCCACAATGGTGGAATGGCCTTGCTCCTATTGTCTACTTTTCCATTTGCTAAGTGACACCCACAATGGTGGAATGGGCCATAAGAACACCTTTCAACTGAGAAGTACAGGAGAAGGCCACCACCCATAAAGGCTTATAAGTGAAACGTAGAGAATCAGAGAATGATGTGTATTTTTTACCGTTCAAATAAATTCTGTTAGAAGTAAGCATAAATGATGATTTTAGGTAATTTTTTTTGGTAATACAACTTCCCATCAAAATGTATTCATTTCATTCCCAGATCTAGCTGTAAACTGGACGTGTTGTTAACATTTTTTAATGGCTGTTTGAAAGATCTAAAGATTTAGGTTGGTGAAAGAATATTAATTTATGAATGCAGTTAGACAACTGCCTGGTATTAACATCAAGGATGTGTTTAATATCCCACCCCCCTCTTCTAAAATGTCAGGATTGACCACTGTCTTTTAATGTTCAACAGGGGGATGAAGTTGGAATTCAGGCTTCAGCTTACTTTTGTGGAGTTGTATTTGTTACTTAATTTTCTCTGTTAGTAGAGTTCACTTTCAGTTATGTTTGTGATTTGATTTGATTGATTGTACTGTTGATCCTGCAGCAATAGCCAGCATATTATTTTTAAGGGAGACACGTGTGCTGTTTGAGAGACCTTCATTTGGCAGTTGCTTTACAGCCTTGTTCAGTGGTGCAATAGTTGTGTTCTATCTTTATAGGATCACACTGAGTGGTGGACAGACAAATGCAACAGACTACCGCGGGACTGAATAATAAGGCTCTTATGTATCACAACTTTTACAAAATGTAATTTTCCATGTTATAAATGAGGGAATGGATTATGCCTCTGTCTAGCAAGCACAACCATCCTGGTGGAAGAAGGCACGGCAATCTCTCCTATGTTCCAGATTTGAACTGAAGTGACGCATCTAGCTGTGTGGGTTGCAAGGTATTCGATCAGATCAGATTTAAGACCATCCTTCTTCTTCCTGTTCAAACTTTTGCAGACTAATCAAATTTGATCGACTGGAGAAGTCGTTATTGTTGACCTGGGTTTTCAATTGAGTTGTGAGAGAGTTAGGATTGTGGAGGGTTAAGAGGACAGACAGACCATTTGCTTGATAGGTTTTACGGTTGCTGCTGCTCTGTTTTTTATTCAAATGCTTTGATGGCGTATGCTCTGTTTTTCATTCAAATACTTTGATGGTGTATGAGCAAGATCTATTTACGCCACATTATTATCTGTACAC
>MSTRG.121721.2 Scaffold573 425639-435060
AAGACCGGCATCCGGCTCTAACTCTCAAACCAGGAACCCGATTCGAGCCCCGTCTTCTCTCACAACTCCCTTGTGCCTCGTGCGTGCCAAATTTCGTGCAAATCCAACCCAATTTGGTGATTTTGGGGCGTCAACACCTCGAATTGAAATTTCTTAAGGAACTAGTTTGCCTAGAGCAAAATCCTGCTCTAACTCCCAAATCGGGAACCCCATTGGAGTCCCGTCACCTCCCACAAGTTTCTCGTGCCTAGGCGGTCGTGTGTGCCAAGTTTCGTGCCAAACCGACGCCGTTTGATGATTTTGGGGCGTCAATACCTCGAATTCAAATTTCTTAAGGAACTAGTTTGCCTAGATTGAAATCCTGCTCTAACTCCCAAACTGAGAACCCGAGTGGAGTCCCGTCTTCTCCCACAAGTCCCTCGTGCCTAGGCAGTCGTGTGTGCCAAGTTTCGTCCCAAACCGACGTTGTTTGGTGATTTTGTGTCATCAACACCTCGAATTCAAATTTCTTAAGGAACTAGTTTGCCTAGACGAGAATCCGATTCTAACTCCCAAACCGGGAACCAAATTCGAGCCCCATCTTCTCCCACAAGTCTCTCCTGCCTAGGTGGTCGTCTGTGCCAAGTTTCGTGCCAATCCGACCCCGTTATGTGATTTTGGGGACTTAACACATCGAATTCAAGTTTCTTAAGAAACTATGCCTAGAGTGAAATCCAGCTCTAACTCCCAAACCGGGAACCTGGTTGGAGTCCTGTCT
>MSTRG.89020.5 Scaffold3636 1363566-1378972
CTCTCAGACACACAGTGACAGAGTTTGAAGAAGATGTTAAGAAGAAGAGTTTCTGTTTCTTCGATTATTGGACGAAGAAGAAGAAGAATTGCCGATCATAATTGTCAAAAAGTGCTCCACATATTTTGGTTGCTATGTGCGCACTTCAAGCGGGATGACTTGCTGATAGGAAAGGTTTTCTCATGCATAGAGGAGTAGATGGTCGATTGATTGAAGAGTTTGTTGCTAGATGATGTTGCTAGATGATGTTGCAGCTTTCGGATTTATGAATTTGAGGAATGTTAAAATGGAGATTTAATTTTAGGCTGGGGTTCACTTTGTTTTTTTGTAATGCTTATGATGTTGTTTGTCAGTTGGTCTGAGCCAATCGTGTTTTCCCCCTTTTGGATTTAATGACTAATAGAAGTGTTCTTTTCACCTTCGTTTTGTAAAATGTTATTACCTTACTGCTGGGAAAAAAAAAAATCATGATAATGAACTACTTACAATTGCCATGGCTAATTCTAATTTCAAGCTCAAATAATTGGTTGAA
>MSTRG.4015.4 Scaffold1078 248898-252570
CTTTATTCGAGGAGCTTTATGTGAAAGAGGGTAAAGGACCCCACACGCCATATAAGCCCTCTCCTCTGAAATATTCAAACAAAACCAGCAACAGGAACGGGGGTTTGATGTTCCTTCGTCAAACCCTTTTGGGTTTAAACCCAAGCCTCCAGATTTCCACATTTTTCCCTTTCTTTGACTTTGATTTTGCGTACAATTCAAGCACACCTCGACATTCTTAAAGTTTTTTGTTTTTTCTTTTTGTTTATATATTTTTTCTCCATAGGTTTTCATACAGATCTTTGGACTTCGTCTTCATTTCTTTTGAACACTTTTTGGTTTGGTAGATTGTTGTTTGTGTTGAAAGAAATAGAGGGTATGGTTGAGAATTTCTCTGTTCGACTGTAATTGTATTGTCTGAGGCTGCTTTTGGGCTGATTATCTGATCTGGCTCTTTTCTGCTTCCACCATTCCTGTTTGATGTGAGTCACTCATCAGATAAAAATGATTTCTTTATCTTTATATCTTTATTTTTAATCTGAAAAATGAATATCATGGGCACATTGAGCTTGTTTCTTTCTTTCTTCTTTTTTTTTTAATAAAATTTTTACTGGAATTGAGACATGTCAAGAAATTTTGTGATTGTTATTTGGAATTGAGACATGTAGGGCATCAGCAACATTGCGTCTGGTGCGTTTATGGGTTTTTCATTTTCCTATTTTGTTTATTGTTAATATGATGTTGTCTTGTCGCTCATTTGATGAAGAGTAAATTTGTTCGTTTGGGTTGAATTTGGATGCCTAGTTGTTCAAATTGAGATTCGCATGCCCATTTGTTGATTCTCCAGATGTAATCTGCATACAGTGAGTGGTGGTAGGTAGTCCATGCAGTATTCCTGATACCTATTCTGTTTTCTTGCAATGTTAATTTAAAACCAATTTTAATGATTGAATTGCATGAAATTTTTATGCATTCTTTTATTTTTATGGAAATCTTGGTTGAAGCTGCCATGTTAGAGAGATGAATTATTCCAACGGACCTGCAATTTCAAAGCTTGGGAGGTTATATGTAGGGACGGTCATTTTCTCCCGCCCCGCGGCGCCTGGGTTTTTCCCGCCCTGTTGAGGAAGTGGGGCGGGGACGGGTTTTGCTTCCCAACCCCGTTTTGCCTGTCCTCCACCCTGATTATATATATTAAATATATTTATATGTATATAATATCTATAATTAAAATTTTTTACTATAATAAATTTAAAATACTAAAATATTATACTTAATATTAATTTTTAGTCATTTAATTTTTATCTTATATTTTATAATTCTCATTATTTATAAATCATTATCCGTAATATACTGTATTATCTATAATTTTTATTAATATATTCATTCTTCAACTTGCAAAATTAACTCATCTCCCGCCCCGCCACCGCCACTGCCACCCCTGATTTGCTCCGCGCCCGATATGATACGGGATGGGGATGGATTACTACAAACCTGCCCCCAACCCGTCCCATGACAGTCCCTAGTTATGTGAATTGATAGTTGTCTTTCGAATATGCTTTACATTATGCAATCATTTAGGTTAGCAATGCAAACACATACAACTTAATTGTAAAAGTCATCTTTTCAACTGTGGCATTGGTTATGAAGTGTGGGGTAGACAATTCAAATTTGATGCAAAATTAAATTTCCATGATAGCCTTTCCTTTTAGCACCTGTTCTGTATAATTTAGTTGGAAATTAGTTGCAAATTGCAATGTTTTTCTTATCATATTTTGTTGATAATTCTTAACCATATAAGAGAAACAAAAAGAAGAACTGCTTACGAAGTAGTTCAGAATTGAAATGTAAACCTATTATGTTTTTTTGTATACAACTAAGGTTATTGGGAATTGGGATCAATGGGGTATCTAAAATAATCAAGCTTCTGTGAAGCGAAGTCCCACATTGCCTGAGTATTAAAGTAATATTAAACATATAACCGTGAGGGCACCCTCACCTTAAGAGCTGGCTTTTGGGGTGAGTTCTACCCAAGACCGTGTAACATGGTATCAGATCTGGAGTACTTAGGGAGCGGTAGGGTGCGTGTCCCTGGCCTGCATGCTGCAAGTGCTTCCGAGTGAGCACATTGGGCGTGAGGGAGGGTATGAAGCGAAGTCCCTTGTCACCTGAGCACTAAAGTAATATTAAGCATATAAGTGTGAGGGCACCCTTACCTTAAGAGCTAGCTTTTGGGGTAAAAGCTTCCTTGATCATGCACAGATAACAGTTTACATAATGGGTTGGCTTAGCAAAATTTTCAAGGGCTCAAGCCACAAAGTTTCAGAAGGAAAATATAATAGGAATGTGGGATATGGAGAAGACACACTCGGGTGTGAACCTTCAAGTTCAGGGGTAAATTGGTTGCTTGTTCTTGCCATCTCTTTCTTCTATTGCTACTTATGAGCTACTATAAAGTTGCGTGACATAATTTCCTAATTTCAAGTTAATTGAAAAGGTTTGAGGAGATAGGCCTAATCATTCTTTCCCTTATGATATTTTTGGTCTTTTTAACCCTTCGTGAAATGGTGGAAATATTTGTCAATTGTCTACCAGATTTCTTTTTAGCTCAATCATTGTTGACCTACTTTATTAGGATGCATGGGCAGAGATTGAAGATATTGATCATGCTATTGCACTATCCCTTTCAGAAGAAGATCGAAAAAGTAAAAACATTGTTGGTGAGTGATTTTGTCCTTGGTGATATCCATGAACACTTGACAACAAATGTATGCTATACTATGAGTTTGATTTGTACTTTGGGCTTAACAGGTAATTTTAAAAGCTGACTTGGTAGGGTTTAGCCAGTGGTCATTGTAGTATTAAAAGCTTACAAGATTGGGAATTTTTTGCCATAGTAATATCTTGTGAAATCAGTTTAGTTTGAGGCACACCATCGCTGTACTTTCCTCTCAGGCTGAGATTAATTTTTTTTCTATCAGAACCACATGCTCGCATAATATAGGGATACACAATACAGGACAGCTGTTTAGCAATCACAATGCTACTTTTGATCTCCTTTTTTAAATCCTTTCATTCCTGTTAGACCCTTAATTCATACTATTATGTGGAAACTTACACATTTTTTGAAATAAAGATATATACAAATTGACAAGAAAAATACAATAGTCTAATGGAGAATTAAATCTACTTGGAAATGGGTCTGAAGCAATCATTCATAATGTTGGTATTATATATTTTAGTAATTAATATAAAATTAGGCATAGATTATAGTTTATATATCTGATGCACATTACAAAAATACCCTAATCACTGGCATGAGAAAATTCTTTGACCAATTAATTGTAAGCCATGAAGTATCAACACTTCAAAATAAGTGCCGTAGCTGTGTTGGACACGAGGACACGGAGGGGACACATATGGGACATGCCATGTGGTGTATCCCTTTTATTTAATTAATTAATTAATTAATTTTTTTTTCAGGAGACACATTGGGGACTCTTCAGGGACACACATGCGGCGTGCCCCTTTTGATAGATGTTGGATATTGAATATTTATTCCTTTTCGCTTAGATTTAATATTTAATAGATCATCC
>MSTRG.146572.3 Scaffold866 295747-296926
CCACCACCTTTGAAATGTTCCTTTGGCTAAGATGTAGTCAAGACAATCTTGTCCATAGCTCCCAATAAATAGAAAAATGTACAAGAAAAACCAGTTATCCGAGACCTCAGACCAAAAGGAAGCAGATCCAGCCAACAAACAAACAAACAAAATTGCCCCTACATCAAAGACAAGAGAGTTTAATTATGTCAAAAGGGATATTAGCTTTAGTCATTTAAACCTTACTATAAAGAAGATAAGTGTAATTATGTTAAAATTATTAAACTTGTATTTTCTCTCAACGTTAGTGGAGGTTAGTGCAATGTACCCAAACAAAAATGTGCTAGTATGTTTTGTTCCCAAATATCCGTATCCCTTAATCTCAATTCACTCACCGTCGTTAAATATGTATTAAAATTTTCATATCTCAAAATTCTTGCATGATCTAACAATTATGAATGGATTAGGAGAGAGGAACATAGATATTTGGGGATAGAGAGTACTTAACCTATTATCCTTATTATTTTTACCCAATGTGGGCTTAACATGCAATAATGCTATGTAAACCCTAAAAAAATGTTATGAATTTGAAATATGTGAATTAGAGGGTTTGGCTCACCATACACAAAGTTTAAATCAATCCTATATATTCAAATTTTAAGTGCTTAAATTTTCTTAATATTTTTTTCTATAT
>MSTRG.56282.1 Scaffold2376 659143-680506
CCCAAACCCAAAATCCTCAATCTCAAAATCCCTAATCTCTTCTTACGTCTCTCTCTCTTTCTCTCCGTCTCAATTTGTTTCAGATGCTGATTCGGATGATTCACGGTCGAGGAGGAAGAGGAAGAGCAGGAGTTCTAGGCGTAGAAGTAGGAAATCAAAATCAGTCGGTGATAGTGAATCGGATTCTCTCCAAGTGAGACAAATCTTGAGAGGAAGAAGATGGAAAATAAGGTAATGTGCTAAGTGGCTCATGTATTCTCTCCACTTTTTGGCTAGTAACCCACTTTTTTTTTTTTTTTTTTTTTTTTTTTTTT
>MSTRG.55660.1 Scaffold2365 525487-527300
CCTGATTCTTCTAAACATGAGTAGAATGGGATTTGATATTTACTTTTTCGATGCAAATAACCAGAGTGAGTTTCTTTGTTTGATTGTTATGGTGATCCTTAATGCCATACTTCTATTCAAATTGTCCAAAATATAAGATTTTGTGTTGGGTTTATTTGAATCTCATAGGTTATGTGAAGACATTGGTCAATATTTGAAGGGGTTTTTTTTTTTTTTTTGGGTGTGTATTGGTAGATTCATCGGGTTTATTTGATCTTCACGATCTCATACGTTATGTAAATACATTGGTCAATATTATAAGGGGTTTTTTGTGTGTGTGGGTGTGGGTGTTGGTGTGGGTGTGGGTAATTGCTAGATTCATCAATTTGTGTTATTTGCTTTGTTCTTGGCACCTATGTTGTTGAGTTTTTATTTCAGACTAGTAGTCCTAAATGTTTTGAACCATCACACTCATCTCCTCGTCTCCGCCCCTCCCCTTGGTAGTGGTGATCCGGTAAAAAATTAATGTGCATTTTTGAATTTTGAAAATTGTTTCTGATTTTAAATATTTATTTTTGTGATGGGTTCTCTCCCCATGCTACCTAGCCCGCTTATGTTCTTATATATATTATTCAGATTCTGCAACATGAAGAACTTTTAAAAAGTAGGCTAATGGCTGGAAACCTCAAGTGGCTCTGTTACTTGTTATCAACTAGTGTATACAGTAATTGTGGTGGTATGTGGGTGGATGAGGAGTAAGTCTAGTAGTTTTATCATGCATTGTCATTTGGTTTGAGATACTTAAGAGTGCATTTGATGCATGTGAATCTCTTCTTGACACTACAAGGCGACTTTGGAAAAAAAAAAGTATGATGAATGTCATGGCTTGGATTCAGAGGTTAGATATGGATATACTGAGTCAACGGAATTGGATTCAGAGGTTTTGTATCTAAAGAAAAATGTTTTGCTATGTTTTGTATATAAATTTTAGTTTAAATTGAATATAAATGCTAGGTTTTGTTTGTGGTTAGAAATTTATTGGTTAAAGAACTTTATACCCGGTTAGATAGAGCAGCTCCAATACTAATGCATGATTTAAAATGTTGACAATATGATAACTCTTATATTTTTTGTCACTTTAGTGTTCATTAAAGAACATAAAACAAGGGGGAAAATGTTGACAATATGAGGACTCTAATATAGAATTTTTTTTGTTTTTTTTTTTTTTGGTAACAGGCTCAAAATTGAAATCTTGTTAGAAGTTTAGACAAAAAAATGTGAGAAAAAAATTTGATATGCAAATATTTTCATAAAAAAATTTCCTGACATTATTTCTCTTTTTCTTTGGTACAGATGGATGAACTCATGCATGAAGCTAAATTGTACAGGACTAGTTGGCACTTGTTACATTTTTTTGAAGAATTATATATTTTTGGATAGATATGTATGGAAAATATATGGGTAGACTAGTAGTTATATTTTTGGATGGTGTGTATGGAAAATATTTGGGTAGATTATTAGTTATATTTTTTGATAGATGCGCATGGATAAAAATTTAAAACATAAAAACAAGTACTTGTCATTTTTAAATTTTTATGCTAGATGGGTGTGACTTGGATGATCATATAGATTACAAGTGAATTTTTAATTGGAGGAATATGTAGTTTGGAATTACTTGTGGATG
>MSTRG.106629.2 Scaffold4478 878761-884436
TGACTTTTAGACAACTTCTCTTTCTAATATTTTGACTTGTTCAGTTAAAAAATAACTTTTTTATTTGCTTTCTAAACATCACATGAGTCTAAATAGAAGCTAATCTGATTTTTCAAACTAACCTTGGGAGGAGTTCTATTATTTTGCTTTCTTGTGAAGTTAATATACAAAACACATATGCCAAGTAGTGAACAAAGAAAGTTATTATTGTCAAAGTTATGGAGTTGGACTTGTGACTAAGTTGACCTCACACTCACAAGTGTATCGGTAGGTTTTTTTTTACCAAAGTTTAAATCATAAGTAGTACACAAGCAAATTGGCTTTGACCTCTACGCATGTGTTGGTGATGGTGCTACTCTTCTCTTAAAATGGACAATTGACCATGTGTAACATAGCTTTCTTCCAAAATATAAAAATTATCCACATTAGTCTTGAGAAATACACCATTTTGTCATTGATTTTAGTGTGAATCAATACTTGCACAAACCATGACTCATCCAAACAAGTCATTATATTCCATCCTCAAACAAATATATGCTTATTTGTTCCAATATACTTTTAATCACAATTGTATCTTGAGATTTTTACTTTATCAATCAATTGAAAATATATTGATAATCGGGAGATATAAATTTTAGAGCGAGAAGATCTCTCAACCACCCATTTTGCCCATCTGTCCTCTATCTCAACTTAACAAAGTCTTCCTTATAGAATTTTAATTTGTTTTGCATATAGTATTTATTTAATTATTTTGTTGTGGTACAAATGGGTCGCACCTGATAGTGATAATAATATATAAGAAAACTACAAATTGTAGTAAAAAAAAAAACTACAATATACCAACACTGTTAGGTAGCCCTCCTTAGATACAACTGTACACACTACAAGAAAAGTAAGATTTAACGGCGTTTAAAAAAACGCCTTTGTTTCTAATATTTTACGGCGTTTTCTTAAACGTTGCATTCTTATTGACCAATACGACACCGTTTTAACTTCCGAAAATGCCTTCAAATGTTTTTCTCTTTTTTCTTTTTTTTTAATGTAAACTTAGGCCAAGTTTGGCATGATTGAAAAAAAGACAAAAAGTCAAAAAGTCACTATCCTATTTAAGTCACATCATCTTATTTAAGTCACATCACCTCTCTAACACATCACTTCAAACCCAACCCATATTTCATAAAAAGTCAAAAAGTGCACTTATTTAGTCTTCCCAAACTAGGCCTTACTAGGCCTTAAATAGCCTATGCTCTCTCTCTCTCGCTCTCACTATACCCTGGAATTCACTCTCTCTTGCTTCACCCCCTTTCGTTTCTCTTGATTCAAACCCCTTCATTTATTAATCGATTAATCTGCAACCCTTCTCTTCAAGTATTCGATTCACCCCTTCGTTTATTCGATTCAAGTATTCATAGATCATCGATTTATCATGATGTGCCTTCTCAAGTTCTTGTTCGAGTTCACAGGTCTTTTTTCATGGTAAGTGTTGATCAGTCTCATCTCTATCTTCTCACATTCAAGTTCAATTGAAGATAATACTTACTGATGGAATCATTCGATTCAGGTATGCTAGGGTTTATCTACTTTATCATTCTTAGATCAGATTGATTGAAGATCTGTTGATCGATTGAAGGTGATTTCGAAGTTCAACCTTCTTCAGCTCCGTGATTCAATCTCAGATTCATTCGGCGATTTCGAAGTTCTGTCTCGATTTCAAAGCTCGGTGATTCAACCTCAGATTCGTCCGGCGAGGAGAGTGAGCACCATCATCTACTAAGGTGAGCACCATCGCTTCAGAAAATCTCAAGCTCTCTCTCTCTCTCTCAAGTTCTTCCTTCCCGTCGATTCTTCTCCTAAGGTTTTCAGTCAATGTTTTGAAGAATTTTAATCTCTGTTTTTTATTGATCAGTTTGGATTGATCAATCAGTGTTTTACACATCTCATTTATTTTTCCCCAGATCACCAGAACTGATTTTTCAACCAGTGTTCTTTATTTTTCACTCTTTGTTTTTTTATTACCCTGTTTTAAACCCTAAATTAGCATCAACAATATTAGCATGTTTTTTTCCTATGCTGATCTGGTTTTTGGTCCCAATTCTGATGTATGCACATATTATAATTTTCTTAATGGCATTGTTGTTAGGGTTGCAAGGTTTAATGGCTCTAGCTGATTTTTAGGAGTTAAGTTTGTGAATCTTTTGTACTTATTCCAGTTACAAGATTAGGGGCTTTAAGCAGGAAATAAGAGTGAAAGATGCGACTGTAAACAGAACTTACTGTCTACATACAAATAAATATGGAAGTCAATTGTTCCAATGAGTAATAGATAAAAAGATTATGAATAATGAATGATAGAATGCTGCCAAGCTTACAAATTAATATATTTACTGATTCTCATTACTAAAGAGGTATTTCTCTTCAAGTAAGGCTTTCAAGCTGGTATAAGCCCTTCCCGAATAAGAGTTGTTCTTATAGTACTTGACATTAATGACTCTCGATCTCAAAAACTCTTTTTCACTAGACGCTGTCCTTTTCCAGAAAAATGAAAATGCTTTAACAGCATCAAGGACTAAAGAGGAATTCTGGAATGATAAAAGGAACATCATTCGTGTGAACTAGGTGAATATAAGCAATTAAAGTCTTTAAACAGGAACAATGTTGAATACTTCACATCAAATGTATATATACAGCAGTAGAAGAGTATTCATACAATCATATTGAACAACCGCAATGATAATATTTTTCAGTCGCACTGAAGGCAACAGGGTATCATCTTATGTCAACAATAATAGGTATGCCTTCATTGTGCCTCACCCTCAGGTATTTGTTATAGTTATTTAACCGATAATGGTATGCATTCATCTTATATATTTATAATGCTGAATGATGGATAGCCAAATACCTTCTATGGTGGTTCAAATTCTGTACACATTTAACGACATCTAGTATTTAAGAAATTTTTGTTGCATGTTCTTGTCCGTAACTTTGATGAACTTGCACAACTAACTAGTTATCTTGATTATTGTCCTCTCATCCATGGCTGTGGTGGTTGTTTTTGCTGAAGTTTATCATTGATACTGTATTCTTTGTTCAGTCTTGTACAGGGAAAACCTTTGTTCAGTTGTTTCGAGCATGGATGCTTTGCCATTTTGCTTCATTTGTTGTGAATTGAGATCTGTGTATGCAGGTAGTGTTGAGTATAATACATCATTACTATCGGTGGTATCTCCTGTCTTTTTCTTATTCACTCTCTAGTTGAAATAACTTACAAATCCTCATGCTTTTTGTGAACCCATTACATAGGCAGCAGCAGGTATTTTCATTATTTTTATTAGTTATTACTTTAAGTTGCGCAGAGCTACTATACAACTTAAACCTCTTATTGAATGATAGGTTGTTGATTCACTTAGTAGTCTTCCCACTGTTCGGTCAATGTTACATCAACAACAATCTCATGCATTTTCATCCCAAGATGTTCACCTTTCAAAGAAAGAGAAGAAGAAAAAGAACTAACAAGGACTGCTGGAAAAAAGTTGATCTCTTTAATTGCTCTCGCTTTAAACTTGGATGAAGACTTCTTCGAGAAAGATGGGGCTTTCAATCCACCAATGCCATTTCTTCGTCTTCTACACTATCCTGGTTGAATCAAAATTTGACTTTATCTGCTTTGTCTGTTAAGTCTTTCTTTTCATTATCTGGGTTCATACATGGACAGATTCAGGAATCTGTATGATGTGTGGTTTATGAAAGGAGCATAGCATTCTATTTGTATGTCTTACTGTCATGAGTACAATTACAACACTTTGGGATGGCAGGATGTTATCCAGAAAATTGAGGATGCATATGAAAATGTAATTGGAAATTAACCAAGGCTCTTTTGCCTCTCAA
>MSTRG.17266.2 Scaffold1366 3308984-3319644
CATGATTTTGGCACCTCGATGGCCTACTTCCAAGCTTAAGTGCTAAAAAAGTGTATTTTTCGACCTAGTTTTCAAATCGGGAGTCTCGTGCCTGTTCGTTAAGTTTTCACAACTCAAATTGGTCCCTCCTGAGATGTTCGAGGCGTTCCCCAGGCCTTCTCGTGACTGTTACACGGTTTCGGCCCGCCGAGGACTATTCTCAAACTAAAGTGTGAAAATAGAACCTTTTCCGACCTAGTTTTCAAACCCTGAGTCCCGCGCTAGTTCCATAAGTTTCCCCAACTTACATCGGTTTCTCCCGAGGTGTTGGAGGTGTTCCACGGGCCTTCTCGGGACTGTTAGAGGATTTTAGGGCTCCCCCGGTGGCCTATTTTCAAACTAAAGTGTTTAGGAAGTGCATTTTTTTACTTAGTTT
>MSTRG.93943.1 Scaffold3876 514939-516165
GCCCATTTCATGAACAAATGTTCCTTGAAGAAGTAACTCACAGTTAGGCCCTATTACTTTAGGTCATGCCATTGATCAGTTTCATTGATTAAATGTTAAATAGCCTTAAGTCAACATAGCATAACATGACATGAAGTTCTTAAGCTATACACATTATTTAACTTACCTTGTCTCCTTCAATGTGGTCCATCTCCAATATTGAGGAT
>MSTRG.92115.1 Scaffold3772 141527-142033
TAAACTTTTGTATCAGGGTAATAATGTCACCGTTGTTGAGTGGCTCCATTAGAACTGGTGGCGGAGGAGGTGGTGCAAAGGGTTGTCTCGATTGTTGTCTTAGTGCTTCCATCAATAACTCCACCATTCACTCTAACCAATCCATTCTTGCGTCAGAAGTTTCAGATGTCTCTGCAGGTCTTCTTTCTTCCATTGGCTATATATAAAAAAAGTGATAATAAACATAGAACACATAAGGTTTATACATGCATTATTACCACATAGGCA
>MSTRG.145386.1 Scaffold8529 94361-106452
CCTAACACTCCCTCTCACTCTCTCCCGCTCTCCTCTCTCTTTATCTCTTCTGCCTCCTACGTCGTCGCCTCTGGTGCCGCCCCCGGCGACCACCACTGCCGCCGCCACACCTCCTCCCTCACCGCCCTCTCTCTCTCTCTCTCTCTTCTCCTATTCTCTTCACCGATCTTCACCGGTCGTCTACTTCGTCTTCACCAGTCACTAGTGTTACAGATGATCCTCCCAAGGTACACACACTCTTGCCCTCAACTCCTACACAACTTGTCAATTCAAACAATGGGAAACATCCAAATTTGATTCTTATAGTTGGAATTGGTGCTAGCATGCTGATCATTGCTATCATTGCTGTCCTTATAAGTTATAATATGTTCATGTTCTTCTCGTCGAGGGAATAAAAAAGCATCTGCCAAAGAGACTGATATTTCCCGAGTAGGAGTTTGCTTCTTGTGGAATGTATGTCTGTGAAGAATGCGACTAACTTTTGTTTTTGTTACTCACGGAG
>MSTRG.2917.1 Scaffold1059 1236566-1238967
AATATTCAGCTTTATGGATATATTGTAGTATATATATTTTGTATATATTAGGGATTCTTCTTTCCTTTTTCAATCCTAGGTTAGATTGTTATATAAACTGAGGTACTCTTGTATTATATATACAATTGAATATACATAAATTATTCACAAAACTTACAAAACCATGTTCATGTCTTATGTGGAGCTTATGGATGGAGAGACGTATATGTATCTTTGTGAATCAAAGTTAGGAATCCATAATAAGCTATGAAGATGGGTCTTTTTACATGCTTCTCATTTTTTGTGTGAAGGATCTTTTTGTGAATCCTCTTCTTCGTCTCGTAGATGTTTTGACAGAGCTCAATTTTTCTAGTGAGATCTTATATAACTCCTTTTGTATACCT
>MSTRG.13888.1 Scaffold129 223023-227857
GTGCCAATGTTGCCTCTAGATTTGTTTTCTGGTCCGAGCGCCCTTTTTGGCATCGAACAATTTGCTCACCTCTGCTCTGCGTCTGCGCCATTGTGTTGTGCCTCTGCAATTCTCGAGTTTTTAAGCCTCCTGAATTCCCATCTTCGCTGTGGACCTTCGCGGCAGCATCCTTCAGGCCTTCCATTCTCCGGCAAACCTTATTCCCTTCTTCTCCTTCCATAAGACTTTTCACAACCATTGCAATCTCTTCTCGCC
>MSTRG.30784.1 Scaffold17 365805-366769
TTTCCGGTGAATTGAAGTGACCAATTTCAGCCCGTAGGCAAAATAGGTAAAAGAGTTTGGCAACCCTTAGACACGGGGTCTTTTTCCATGTAGAAAGAAAGATATGTCGCTGAAATCAATCTGGCAAGTGATCCTTGATATCAATCTAGCAAGTGATTTTTCTCGGATTTCTTGATTGAAGGGACTGCAAACCATAATTGTGGGATAAAAAATGAAGAATATTATCTAACAACTTCAACAAAAATTTAATGAACTACGACATAGATAGAGATTAAAATCAAAGATAACAAAAGAATGTGGCTTAAGTGCTTAACTCATCCGGCAAATTAATTTGAGCTAGTTCATGGGCCACAACTGTTTCCATAATGCCGTTATGTAACTGTATGGGTGGTTACCACCACATCTCATGGTCGTGTGATTGAAAATCACAGCCATAAAGGCCACCACCATTATGTAACATCAATTACGACCGTTACACCTTCGTTTTTAGCAGAATAAGCACTGTTACAAAAATGTTAAATCTACATCCTTTTTAGTGTCCAATCTTTAAGTTATAGAAGATTTGAGTTGCTATCAAAATTAGATGAGATTAGTCCTCCCGCTTTTGATTTCTCAAAGAAATTTTTTTACTTTTTTACTTGACTCTTAGATTATTAACTTAGATCTATTTGGCTTTAGGTTAGATTTACTGAACAAAGCGTGGATATCATGTTTTGTACTTTTACATTAGTATGTTGTTGACATATTGCACTATGAATTTTTGTTTCTGACTTCAGGAATATTAATATTAAACATGCTTTGTGTGTGTGTGTGTGTGTGTGTGCGTTTTTTTTTTTTTTTTTCGCATAACAATGAAAAGTTATT
>MSTRG.12278.1 Scaffold1248 1107186-1108105
CTAGCTTGATTTGAAGATTTGAACAAGATTTTCAATGTTTGGGAGTTGTAGAGTGTTTAAATACTGATTTAGGGGCTGGAATATAGATGATTTCAGAGGTTTGAGAAGATATTTACACAAGACTTTAGCAAGATGAAAAGAATTGAGATCTCCTTCCCTTACCAATTCTTAGCTCTAGTGTTTCTCAAAGCTTTCTCTATGATTCCTCTCTCCTCCCAACTAAAAAGAGGCCTCTATTTATAGAGTCAAAGGTCAGAGATGGTGGGGAAAGTCAACTAGACAAATCTTGGACCGATGTGCAAGGACATGCAAGTACAGTTGCAG
>MSTRG.63620.1 Scaffold263 875766-876375
CTCCCCACTCTGTATTGATAATCTGAATCAAGAACATTCATCAAAATATAGCCTTGAAAAAAACCCCTTGGTTATTGATCTAGGTAGGAATTTTACAAACCGTCCTTCCAGATGTGGAATTGTGGCCCTGTAACTTAGGTATAGCATCTATGCATTCTATATAGCATGCATTGGTTCTAGTCCACAGAATGACAGTAACTGAGACATCATCATCCCAGTATCTTGCTCCAGCTAGTGTTCCCATAGTATCATTGACCTACGTTGTCCCAAATTAATAACAATAACACACCATTCAACAGACCAGATAAATACAAATAATAACTTCATTGTTCT
>MSTRG.136581.2 Scaffold73 296259-297601
TGTGATACAATCATACAGGAGGACATCAATAACCAATGAAACTAACAATGATGGTACGTACTAAAATCCTAAAATATCTTTATGCTATTTTATGTTTTATTTTTACTGGTCAAAAAGGGTAAGAGGGAAAAGACCAAGTGGTGTCCCTGGATGGAGAATGGGCCTCTATCCAATCATAGTTGGACTAGCACTAGTAGATTATTGTTATTTAAAATCCTGTGCAAAATAAAGTAATATAAGCAGATGACTTATAAAAGAGAAACACATAGGCTTATTTCTTATTATCTCGTCAAGGGATGCTACTATTTGTTCAGTATCATCATGTTTAGCCATGGAATTGATTGAAAGTGTCAGCCACTAGGCTATCCCCAGTTAATGTTTTCAAGGACAACTGAACATTGTAACCTAAATCTTTTTGGCACGAGGAAAAAGAAAAGAAAATAAAGAAAAATGGGGAGGCGTTATGGATCAGTTTCATAGGATAATAAAACATATACCTTAGTTTTTTATTCGAGAATTTGTAGTCTGCATTGTGGGATTCCTGCAAGAAAATGCCTGCATTATAATTTCTGATATTGTTTCTGAATGGTGATTAATAGGGAAGAACTAATACAGAAAAAAAATTGACCTGGATAGGTTAATGCATCATATGATTGTTCAGGTCTCTTCTGAACAGGAAACTTTTGCATGAGGAATTGGTGCGGTGTCACCACCACCACCACCAAAATATGGTGTGGGATTCCAGTACCCATAATCTTCTTCTACAATCATAGCTTGATTGGCACGAAATTCGAGGTGTTGACGTCCCAAAATCACCCAACGGGGTCGGATTGACACGAAACTTGGCACACACGACCGCCTAGGCACAAGAGACTTGTGGGAGAAGACGGGACTCCAATCGGGTTCCCGGATCAAGAGTTAGAGACGGATTTCACTCTAGGCAAACTAGTTCTTTAAGAAACTTGAATTCGAAGTGTTAACGTCCCA
>MSTRG.120739.1 Scaffold5668 148177-151618
GTCTTAGATAGGTTTTGGAAGTCATATTTTTAGAAGCTTCCTATTTTGGAATCCCAGCTAATAAAAGAAGTTTCTAAAGTCGATATAAAGTCATGCAATACTTCTAATTAATGGAGTTGATATTTTAGAGAATTCCAATAGCTCTGCAACTTTCTTATGGATTGTGTGATGGAATTAAACCCCAAGTGTGATGCCTAAGAGAGTCTAGGAGTGATTCACAAAACTATCTTATTCTCTTTCTTTCCCAATTGTATTTTCTACACTTTAACATTCCCTAAACAATAATAAAATCTCATATTTTCATGCTTAAATTCTTACCCCTTTATTACCCCATACAAACCCTTAAACCCCTATACTCTGATTGTAATTTTCAGCTGTAAAACCCAACTAAAATCAGCCCCAAAAGCCTACTGTTGCTGTTGTCCCTACTTGTCCTACATCACCAGCCCTAGGCATAGGCGAGCTAGGCCGCCACTACCTAGGGCCCTGAAAAAAATATGGCCCTTGTACCAAATGCAAAAAGAAAATTTTGTTTACTTCTTTAGGCCTCAAATAAAAAAGTGCCCAATTCCAGATTATACAAGATTAATTAATAATTTTGCAGCTAAAAATGCAAGGAAAGTAATCTTTGTGTGAGATTTTTCTATAATTTGTTCAATTTTTTTTTTTTTTGTTTGGTATTATAATTTTAGATTGTTTTAGTATTTTGTCCTTATTGTGAACTAGACTTTGCTATTTATGCAAGTAAATTTTGGTATGTAACTTCTATTTTATTTATTTTTTTATTAAACATTTTAGTATTTCAAAATTTTCTATGGAAGCATTTTTTAAATGAATATATAAAGGACCCCATATTAGGACTTCACTTAGGCCCCAAAAACTCAGTGCTAGCCCTGCTTGACAGTACTTTTACTTTCCTTTAATGTGATTCTTTCTCTTCTTATACTCACTGATAACAAAATTATTCACTTCTAATATCTAGTAAAGACACAGATTTCACTAATGAATTATGAAACTGTCCTTTACTCAACAGTGTCCTAGCTATCTTGCCGTGTTAATAGAACAAGAGTCCAGAGAACTCAGAAATGATGGAGTCATTTGGTGAGAAATGCTGAGAAGAGTCCAGAGAACTCAGAAATGATGGAGTCATTTGGTGAGAAATGCTGAGAAATATCTCTTTTCTCATGTTTGGTTTGTAGGTTAGAGTGAGCAAGGGTGAGAAAGAGAACTCTCTCTTACTAAGCCTATTTCACTTGATTGGTATAAAATAATTATAATACTATGATTCCCTTAATATATAAAGAAAAAGAAAAAAATCCCACTCATATCCCTCTCTCATATACTTTATTTTCTTACTCATCCAAACATTGATGGCAAGAAAAACCATTTCTTTTCTTTTTTTCACCGTACAATCCAAAGTGTGAAGTAAAAAAGGGGTGAGTAGTAGCATATTGATAACTTGTAGTAACTAGGCCCCCTTTGTATATCATTTGGGAAAGTACTTAATTTGGTTTCAAAAGCAAAGATTGATGTAAATTGACTCTCAATAGCTGGATGGCCT
>MSTRG.62171.3 Scaffold2594 394640-434517
CTCGCAAGGTAAGTCTTTTTTCCCGCTTCAGTGTTTTGGTTATTTTAGGGCTTTGTTAAGAATCTAGATGTTTGATGGGTTCTATTTTTTTGAACTGTCACAGGTTTCTAATTCAACCCATCTCTGCCAATAGCAAGGTTAGGGTTTTGGTTCTCTCTTCAAAATTCGTCTTCTATTTTGCTTCGTACATCCAATTTTGTATGTTGCTCAATTTTGTTTACTTCGGCCATGTTTGGTAATGTTCGTTGTTGACCACCGCACAACAACCCATCTCTGCCAATACCAAGGCCACGGCTTTGCTCTTCTCTCTTCAAAATTCTTCTTCTATTTTGCTATCTGTATTTGTTTTTGGCTGTCTAGAAAATGTAATTTGTTTACATTTTCTGGAGAGTATGTAATTTGTTTACATTTTCTGGAATTGGATTGTTTTACTATGAAGTTTTTGAGAGGGGTTCAAGTGCCAATTAATTGAGGGTTATTGCCAATTAATTTGTTTCTTTGCTTCTGTTTAAATTTTGAATTCCTAAAGTAAGTAGTAATCTATTTTCTCTTTTAAAAGGGCATATATGGGAAGAAGTGAGGGAATTCAAGAACACAGTTTATAAGCAAAACCATGTGAACATAGTTTACATGTCATCCATAACTTCTCTAGAATGTTTCTTCTTCTTTTTTTGTTTGATAGTTTTATAGTTTTTTTTCACTATTAAGTTGATAGTGTAAATTTCTTGGTAATGTTCTTAATCTTTACATCTTAGAGATTGTTGAGTTTATGTAAGATTGATGCTGAGCTAAGAAGCACGGGTGCGGGTACGAGTACGGTACGGGTGCAGGTACGAGTACGCCGATATGGCAAGATCCCAAAAAGGTATGATACGGGTACGGGTACGGTTGCGGTACCCCGATATTTTTTTTATAATTATGGTTAAAGGATCCAACCTACAAATTAAAATTAAATATCAAAACTAAAAAGAGAACAACAAAACTAAAAGACAAATATGACAAGATATTTTTTTATAATATTTGTGAAATCTCACTTGACATGTTATGCACTGTGAATCTGTGATCATAATTTATTTCAGTGACAAGTATGACAAGAACAAGGACACTGCAACACCTTTCAATCTAACTCCCATATTGACCTACAAAGTATCTCTCAATTTTAGTTCATGAAAGACAATGAAACAATAACCAATCATATCCACCCACAACATCAAGCATTGCAAGGAAATTAACCAATGTGGAAACAGATAGATAACTTAACTTAACTCAAAACCAATGGTTATGCATCACAAATTAATGCCCTGTTTTTCAGTTACAAAACCCCCATCCCTCCCCCTCAAAATAAACTGCTACAAAAGAGAATTTAAG
>MSTRG.64441.1 Scaffold2672 310304-312445
CTTGCTTTGTAAATAGGACTTGAAAATCAAATAAGAAGATCACATAATAGAATTATCAACAATGACCCCAATCAGTACCATCCTTGAATACTTAAAACTCAAGAGAAAAGACCACGATTAAGCTAGACCAAGTCTAACTTATAAAACAGAAAAGAGAGATACCCTAAAGATGGTACTAATTTTCAGAACTATCTATAGACATCCTTCTGTTTTAGTATTCAAGGATGGTACTGATTTTCAGAACTATCTAAAGACATAAAGAGAGATATCAATGCAGCACACCAAGAACGTAGAACTCAGAAGTTAGAACAACTTAAGTCCATAGTTTTACCCATAAATATGACAAAAAATGACCAAACCAAAACAGAATTCAGCTCCAAAACTGCAGTATAACCTTGAAACATAATCTCTATCCAACAGGAGGGAGACCAGCATGCTGATAAGACATTCAAAGATGCAAGTAACAAGATTTTCCTCCGAGAAAAAACAGTACTCTTAACTAATTAACACAAGCAACCACCAATATTCACATTCAATTAAATGTTTTTCACACCCAATCAAAATGAGGACCACTGTGGGCAAAAAAGAAGGGGAAAAAAAAAATGTAATCGATGTACGTTTCATTCAGTCAATCACTACCAGATGAGTGTTGCATAAGGACCTAGGAAATTTCCCATATCAATAATAACCAATGCAATCAACGACAGTTCCACTAACAAGGAGCCTATACTTCACTTTCTTTTTCCTTTTTTCATACAAAGACGCAAAGAACACTAGATGTTAGCTAAAATGTGATTAGATGTTTAGAGATTACATCATTCAGAACCTTGTGTAATATCATGGCAATGACTGTAGTTGGTCTATGTGACCTTGGTGTAGAGGCTAGTAATACTATATGCTAAAATATTTTTAACCAACTGAGGTTAGTAATACTGTTATCTTCAGTCATTTTAAATACTTAACCATATTGCAAATTAGTTATCCCATCAAATTCCCCGGTCCTCTAGCAGTTGGAATTACTAGCTCAAAGATCAATAATCAACCTAGAAATTCCATCAACTCACAATCTACTGAATTAAAATAGCTCAAAGATCAATAATCAAAGTAAGGATTCAATTGTCAAATTGCACTATTAGCTAAAAATCTAGGTGCAACATTGGGTGATGAAGGGTTGGTGTGTTGGGAAAGATGGACAGCTTAATTGAACAGAAAACTAGTTTTGGGGCTTAATCAAAAAAACAAAAAAAAAGATGCAAAGTTTGGCGGCTTCTGGAGTACATTCAAATCTCCATCTCTATCCTTATAAGCTTTCATGTTCAAAGCAAAACAGATTGGTAAAAGAAGCTTCAATATTTATGAAACAATGATATCAAAAAGTGTATGTATAGCCTACTAGACCCAGAGCAATTTTCAAGGTAAATAAAGATTGCTTAATGCTTCACTCTAATGATAAATGTAAGGTTGCCTATCCATGTTTACCAATTTTCAAGATGTAAAAGAATTATGATATGCAATACAAAAAAAAATAAAAAATAAAATAAGAAAGGGCACGCAACACGACACATTATTTGACAACTTGGTCTCCATCATTAGAAAGGTACAGTTGCTTCCATTCAGCCAATCCAGTTATGTGAATGGACGTAGTAACTTTCTTCTAAAGTTTTTACACACTGAATTGTTGAATACATTGAGAATAATGACAATATAAAGTTTTATGAGACAAAATAACTATAAGTGAATAAGTGAATGCATGCGACAAATTGATTAGCATTAAACATGATTACTACTTTACTAACTCATTCTTTTGATATCCAGCAGAAACAATAGATAGACAACCAATGACTATGTTTAACAGTTCCCATTGTGACAAAACATCATATTTAAGTACTAAAAAAAAGTAAAAGCAAAAATTATTCAAATAAGAATAGCAATTAAGAAGCATCAG
>MSTRG.49574.2 Scaffold2181 1078636-1082232
TCTCTCTCTCTCTCTCTCTCTCTATACCTCCATTAGAGCCCATCTCGTGTGGGATACTCAACCCCAGTCCCTATTCGTTTCTTCTTCCTCTCTTGCTCTGATTCAGTCAATACTCTTGCATACTCTTGATTCAGTCAATTCCCTATCAAAGCCCAACCCTTGCCAAAAACTCAACCCCGAACCCCCTATTACTCTCTTCATTTTCTCTTTTCCTTCCACCCTCTTTCTGCCATCTCAATCTTCATCAACAGTGGCAGGCCAAATTCCCTATTCCACCACAATTGACACAACCTTTTCAGCCATAGGAGAGATTTCGAAAAGTGCCATTACAAAAGGGGAGATTTCGTTGGACCACCACAGTCTCTAGAGAGATCGATACTCCGTCGTTGTCAATATTCAAAGAGATCCCAAACAGTCTCACACTCAAATTTTAGTTGGTTTTGCTGAAAGGAAAGCATTAGTTACAATAATTGAGAAGACCCATGGCGGTAATGGACCCATGGTAATCAGGTCCCCGATGGATACATTGTTAAGCTTACTCATTTTCGTTGTTATTTTTTTTCATTTGACAATGTCATTGTGTATTAAAAAGAGAAACCATTGTGTGATAGTGTATGTTTGCAGACAAGTGGAGTGAGATCAACCGACAACGCTAAGCTAGGATAAGTTCTATAGTAATTTCTAATTTTGCTTCTTTTTTTTTCTTTTTTTCTTTTTTCTTTTTCAACTCTCCATTTCCAACCATACGCACTATCAATCTAATTTGTCATTACATACATAAATGAGGGATTTTAATCTCTAATTTGATCATTCTCTTCCATGTGATGTTTGTTATTTCTTTATGATTTTGGGGTTCTCATCTAGAGAGTTGTACTAAATATAATATTTATGTGGCCAATTGGCAGCTTGACAATAGGATGGAGTCAGTTGCTTGAAGTTAATTGCTTTTGTTGAGTCGATTTTTGGATTCTAAGATTTTGTTTACTCCAAGATGGTAGATCAAGTACTACTACGAGCACATCCTCCTTATTGTTCCTTTGCTAGGAGAAAATGTTTTAAACTTGATCCCTAAACATAATGATAATCTCTTTGTTCTTTGTGCTATTTATTCTAATTTTATATTTCTATTATGGTTTCAATATCTTAGTTTTCGCAGGACATACCACTAGAATAATATTTTCTAATTTTATATTTCTATTATGGTTTCAACATTATGGTTTCAAGACATAGCATTAGAACAATCAAACCTAGCCTCAAAATTAAATTATATTGCCAATGTGTTTAGTGGCAAAACCAATATTTTGGCTTAGGGGCAACATTAAGCAAAAACCTAAGTTTATATCGCCAATGGGGTATGGTGACAGAACAAATATTTTGGCTTGAGAGCAACATTAAGAAAAACCTAAGTTTTGTCCAGTTTCACAAGCTTATTTCTCTCCCAGTTGTGTAGTTACGGACTATAATTTTTAAAAAATCACATATCTATCCGTACGATTAATTTTACATATGATCAATTAACAGTTTAAGGATTTCCAGTAGCAGAGAATATATTAGGGGAATTGCGTACATATCAATTTGCTTCTTTCCTTTTCTTTCTTGGAAGTTTTCTATTTAATTGTCGATTGCAACCATCTGATTGGTGGTTTGATTGGATAAGGGTGGGTGCTGATTTGAATGCAATGTCTACTTACCAAACACAATTCATACACATTCTTGCACAAACTATAATGCCTCTCTTAATGTTTATGTTTGTGATTAGGTAACGGTTTTCAATTTACGTATAATGTCTATCTTGATCCTTTCGTTAATTGTTAATATGATAATGAAAGAGTTGTTTTCATTTGGAAAAATTGACTTAAC
>MSTRG.131962.1 Scaffold671 1259595-1261466
ATGGACATACAGAGAAAAATAGTAAATAAAAAAACAGCATCCCTTCGAATTATGCATGACATTCAATACATATTTCATATAAGTGGTGCAGTTCTCACACACAAGTGGCCCTTTTATCCCATCTCTTTGATAATTCTAATATCTTTAATTAAAATTCCTATATTTTCATACCATATACAGTCACAAAAAGTACCATGCTATTTGGTGTCTAAGAACCAAAAATTTATTGTGGTTCATGTATGTGTGAAAGAACAAGTGCCATGTGTGAAAGAACAAGTACCACCCATTATGAAAAGCGAACATGTTCTGTAACTGTTCTAAAGGTCATTCCACAATACATGCCCATGCTCACTTAAATCAAATCAGTTGTATAAAATAATTCAGATACAAAATTTATCAAAAAAATAAAAAATAAAATCAGATACAAAGTTTTCTATATATATATATATATATAAACCTTTGAATTCCTCCTTTTTGTGTGCCAAATCATGATGGTAAGTCTGGCACAGTGCCTCATAAACATCACCCTTTCAAATTTAGGGCTTAGATCCATCCACAACATTATCAACCACATCAATTGTCAAGAATTTTTTTACTTGCCTTCATACCTTGTTTGAGGTCTAATTAACCAGCACTGTGACTTGTAACTTTAAGATGAAAAATGGTCAAATTTTTATAG
>MSTRG.88776.1 Scaffold3629 243790-250950
CTACAATTGGACACCTCCAATTGTGATAAAAAAAACCACGGCCAACAGCCACAAAACAATCCACTAAGAAGATATAAAGGAATTACACAGGTATACTCTCAATTATCTAGCGAATCCACGCCCGAATTGAACCAACCTCTATGTGCCTCTTCCAACCCCGTCTTCACCTCGGAATTGTCTTGACGATGAGCTACTCCGGAATCCACCAAAGCTTCAGGCTCGAATTCTTCAGAATCCACCGAAGAACAACTCTCTCTTTTGTGTAGAAC
>MSTRG.8737.1 Scaffold1175 852831-854743
ATACAGGAGATTGAAGCAGATAGGTGGTCTTGCGAATCAAACTTATCCAAACTGAGCAATTTGATATTGCTGAGTGGAGTGGAGGTGAGTTCATCATCTCACTTGTGCCTGCAATATAGAAGATCATGAGGTTTCTCAACGTGAGAGGTGTGTAAAAAAAATACAAAGAAGATGCTCAATTGGTGGAGAAGCCCAATTTCTTTACTTTTCATACCCCCTATTCCTCTTTATACATGCTTTTTTACAAAGGAGTACTCCAAAACAGAACTTAACAGATGATTAACTAACTACCTTGAACAACTTCATAACAAATTAACTGTCTTCATCACAAACTAACATCTCAGCTACAGTCTTCACTTCTGATTGGTTCTCTCCTGCCACAAGTTCAGTTGCAATAGATTCATACCCTAGTCTTTTGATTAGTCATGTC
>MSTRG.87828.1 Scaffold3595 406179-414318
TGCCATCCCACCATAGAAGTCACTCTGCACAGCATTCGGTATTTTGAACATATCTCTCTCATCTGATATCGGATTAAGGTGAATCAAGAAGCATTGGAAAGCTAACTTAAAGGGCTACACTTTTATGTGAAATAAGAATTCTCCAATTCTGACATTTACTAGGTCAAAATGGGCCCGCAAGATGAGTCAAAAAATCTGGAAATAATTCTATCCAAATTTCTTTTTATTTTGGAGAATTCTAGCCTCTTGGGTATTATTTAGATGTGTCCTATGTCTAAAAATAGAGAAGCCTATTGATCATTAGGATTATTGAGGATTCCAGAGAAAAAGTAACGGAGGCAAGGAGAAGAGGTTTTCTACCTCAACCATGAGCGGCTACTCTTCTTATTCGGGATTGAGACGAAACCC
>MSTRG.58891.1 Scaffold2466 94904-97838
GCACTTCTGAGAAGCCAAGAAGTAGTATCTTAATGAAAAGCAGTATTCCAAATCTATCACCTTTAAAAGTGTTTCATGGCCACCTGTATTAGTGAAAAATTAAAAATCTTTATTCTTCCCTAATTTGATTTTATACAGTACCTTATGGGAAGAAGATGGAAATCCAAGAAACTAGCTATAACCATGTTTTTACATGTCACACATTCAGCATTCAAATGAATCGATTTGGGGACAGAGACAGTATCAAAGTTGAGATGAAGTTTGAGGTTCAAGTGAATACTTACAGGAGAGATTGATTTTCACTGAGATTATTCAATGCATTGAACATCTCAACAACAACAAGCACTGTCATTGACTAGTACAAAATGTTAGTGTAGAAAAAGGATAATTTATGGGCATGCACAACCAATAATTCTGTTGAACAGAAAAATCAAACCATTGTCAATGCAGATCATGGGATCAACAATAAAATGCCGAATGCTTATTGTTGAAAAAAAGACATATGCAGTGTTAGCAGAGTCCTTTTAATAATAATAATAATAATAATTAAGTTCAAACATATTGTACCTGTACCACGTATTGTACCTGTACCACGTATCTCTTCAATATATCTTCATAGTTTGGCGAAAATGACGTCGTTTCATGCATTATGTAAACAAAAATAAAAATAGAACTGAATCGTAGTGAATCAAAATGAATCATAGTGAATCGTAAATTGAATCGTACGATTCAATCAATTTCTGATTCAACAGCACAATTCGAATCTTTTTTTTTTTTGAAACTTGTATCTAATCGTATGAATCGAATCGTGAATCATATGATTCTGTCAACCATGGGTATTTGTACTTCGTATGGTACTTCTTCATGCATATTGTACACGAAAAATGTACCAAATTTTTTTTTCTTAGTTTTTGCTGTACCCCAGACACACCTAGTATGTACTGAAGCCATACCATACCTTAATCAAAACAATATTTTGTTCTATATAGAGGTAAAATTAGTTTCATTAGACATTATTTATTTGTTCTTTTTTTAAGCTTAGCATGATTTTAAAACTAAGTTATGACTTGTAAGTTATTTAATATAATGACATGTAATTTTTGTTTATACCTTTACTTTTTGCCATTAAGTATGAATTGTAAGTTGGATCTTCTTAACAAACTAAAGCATTAAACTAATTTTTGTATTACATTACTCAAAATTAAAAATAAAAATATGTTTTTATAACCGGACCTAACAGTACTTGTACCCTACTTTTTTTAGATTTTACCCTATCGACTCTCACCGGTATCGTACCAATACACATACCCGTACACACGCTTCGTAGCTCTGCATGGTTGCTTATTGTATAATTTGGTTCTGAATAGAAACTGAAAGACACACAACCCAGACGGCAGCTAGAATATTTTCACAGCTAGATGTAAAGTTATAGCAATTTCAAAGATCAAATACAAATATATTGACAATTAGAAATGGGCAAATTACATATTCCCCTTGAGGTTTAGCAAAATTATAATACCTCCTGAGGTTTGAAAAATTACAGATACCCCCCTGAAGGTTTTGCATAACAAATTAGGGGGCAAATTGTTATGAAAATATAAACCTCAGGGGGCAATTTGTTATGAAAATATAAACCTCAGGGGGGTATCTGTAATTTTCGAAACCTTAGGGGGTATCTATAATTTAGGTAAACCTCGAGGGAGGTATATGTAATTTGCCCATTAGAAATTATATAAAGGGAAGCCAAAAAGAAGAAAGTGAAGCAATTCCATTTACAATATGTCAAGCCAAGTGTGAACATAAACTTGTCCTCAAATTTGTAGACCATCGCTTTAATATGTGTATAACCGATAAATCAACTCATAATAGGGACACTGATGCAAGGTTAACCACATTTTTCCAGTCAACTTGTAACAAATTTGGAGACATCTAACTCAAAATTAATTAATTATAGGTGAAGAAACCTCTAGGCCACATGAACCAAGCTTGGATGGCTTAGAGAAGCAACGTGGGACAAGTCTCTAACATAGCCAATTTTGAAATCAATCATAATCTGATATTTACTGAATTTCCAACTTTATGGATTAAAGTGGGAATTAAATGCTTAAATATCTTTAGCTGAATTTTCTATTGGATTTAGCCTGAATTTAAATAAGAATAAAATAAAACTCAAGACATTTCTGTCTAAATTCTACGTCTGGATTTTCCGAAATTTGGTCAAATATTTCACTATTCTTCCAAAATGTATTTCTTTGAATTTGGATCT
>MSTRG.59207.1 Scaffold248 447483-449804
ACAGCTGCCTCAGCAGCCACGGCAGTGGCAATGGCAACAGAATAAGCATGTTTGTTTTGCTCATTTTCGGCTTCTGTTAATTTCACATCCTCTATTGGAGTTATGGCCAATACAGTTTCTTTAGGTGGAGAGCCCGGATAGGGGCTCTTGCGTTTCCCAATCCATTTGTTCTTCGATTTATGGGTTTTCTGTTTAGAGAATTGCACATTGATCAATCACAGTTCTATTACACACACACACATAGAGC
>MSTRG.141698.3 Scaffold8009 558991-559695
AAACTATTGCAGATTGAAGCCTTCTCTCTCTCTCTCTCTCTCTCTCTCTCTCTATGAGCAAACGAAGTGGTTGCTGGGAAACCCTAGCCGCATACAGAGAATAAAGAGTAGGAGAACCAAAGCAATTGCTGCGGAAACCCCAAGCATTTTCAGGTAATTCCACTTTCTCTCTCCTCTTTCCCCAGCCATCCCACCGTAACCCTACAGTATTTGTGAACAATAAAAGCAATAATATGTTATTGTTCTTCCATTTCGCGATCTCAAGAAAAAAAGAGAGGGGTTTCGTGATCTGCACAAAATCATCAAAAAAAGTAATCTTTTACGGTTAATAGTTTTGCCTATCTCATAAGCATACATATATAGTGTCAATGTCCGTATATGTATGAAGTACCTGTTCTTTTTCTAGGGCAGAGGGGCTGTTGTTGGCAGCCATTGAAATCCGAAGGAACTGAAAGATCAATCAGAAAAAATATTCAGAAACAAGAAGTCACTCACCAATCAGAAAAAATATTCCGAAATTATTTACTTGATATCAGAGTAGTTTATGGAAGCAATGGATAGAGTGTAACAATGGAGTGTAGCAAGTAATGGAAA
>MSTRG.20678.1 Scaffold1465 394926-395670
CGGAGGAAGAAAACATACAGACCAGTGACATAAAACATGTTCCCAACAAATTCGATAAGGTAAGTTGACAACTGCTTCTCTCATTCATGCACATGATACCATTAACGACACTAATGAATAAACCGAGTGTAATGAGTCCAATTTCTGCATCCCTAGGAAAGGCAAAGAAGGTAAATGAACCAGAAAGGCCTTACACTTATGCATATATTCAACTAATTTTAAACTAGGAGAACAGCTTTCATATATCTAGCAGTTTTCCCTTGTTTAGGAGGAAGGGTTGGGGGGAGGAGATAAAATTTCAAATGCAAAAGGTAATTATCAATTGAAAGTTTGGTCTTGGTCAAAAGCGAGCAACTATTGCATTCCTGATGATCAAGAAACCACAATGAAGGTGGTTGTGTTTGAAGTCCCTGAACTACTTATGCATGTTCTGTTTTGATAGATAATATGGGAATTTTGGCATTTAACTTGCTTTGCCATTGTGTGCATGCATGTTTGTGTGTAGTGTGTTTTTTAAAGCTAGGAAGAGTAACATACTGAATAAATAAAAAAATGTGTACAAGCCAAAAAGAGAATATAAAAAATCCAAGAATACATTTGAAAAACAATGAACAATGAGCATCAAGCAATTTATTCAGCCATTCATGCTTCCAAACAATAAGATAACGAGAAAAAGGGGTATCACTTT
>MSTRG.88794.3 Scaffold3629 511248-512269
GTTAAATTGAGTTTCTTTTTGCTGTTTATTGTACCCGGCATGTATTTGGCGTACCCGGTAAGTGTACCGCTGTATCGGTATGTGTGCCCGCACTTGGTAAGTATCCGATACTTATACGGCATTATTTTTGGAGTACCCGTGTTTCATAGCTTATATAGATGACCCCGTGTAGACTCAAGTTTGGGAAACCAGGAAACTTGGGACATAAACTAAGTGAATTTGGAAGCAAGCAATAGCTAAAACTTAAAAGGCTTAACATAGTTGATACTATGAGGCCTAGTTGTGTGTACTCTATATTCAGCTCAGCTAAGGAAAAATTCTGTGCTGGTGATGTGTACGAAGACAGGAACTCACGAGAGGTCCTTTGAAGCTAATAGCTACTATTCACTGTGTGATTACATTCTTATTTTGGAATGTGTAATTACACCACCTCTTAGATGACTAGGGCTCTATATGTGATTTTATTTTATTTTTGTGGTGATGGTCAAGACCATATATATGATTTCGTCAGCCTTTCCTCCCAACTTTCTTCTTTTTCTACCTCTAGGCTCTTAACATTGTGTTTGGGACCAAATCTTTTTAGAATTGTAGATTTCAAAATGGGAAAGGAAAAGAAAACGTTTCTAAGGAATTCCTTTTGTGTGTGTGTGTGTGTGTATGTGTTTGTGTTTAGAACTAATTGGAATTAGAAGGAAACTATTCCATTCTTTTGTTTGGTTTGATCAGGAATTGGAAAGGAGTTTTTTTGTTTGTTGAAGATCATGCCCTTATTAGCTAGTAGGGAACTTATAAGAAGAGAGTGTATTATGGGTATATGGGATTAGATAAGATTTTATAATTCTAATTCCCTTTAAATTCAGCCATTTCATTGGATTTCAAGACTCCTTTATTTTGCTTTCCCCCTTCCCCATTTTAGATTCCGTTCATTCCAAACATATTGAATTCCATTTTGAAATGCCAATGCCATCAAATTCTGTCAAATCCCACAATTCCAAACACAC
>MSTRG.114559.1 Scaffold5051 464814-469281
TCTTTGCAAAATGCAGTGGTTTCCTTCACAAACCCACGCACACTCACTTCCTAATTATGGTTCACTCTTAGTAATTTATCATGCTGGATAACCTTAATGCAAGAATTCAAGTGACAAGTAGCTGGGTTTCAACTTTAGCAAAGAGTATGTCCCCTAAGCTTTGAACTAGAGGCTACATTGAAGTTGGCAATATTTCTGTATAGGTAG
>MSTRG.136209.1 Scaffold7256 25420-30944
TAAAAAACCAACAATTGGTTCTGATGCTTTGAACAGTGTTTCTTATACTCAGAGAATATTAGGGTTTGCTCCGAAGGTTGTTACTTTGATTCATAATCCCTAAACAGGTCTTTAAACCCTTTGAAATAGACCAATAATCAAGCAATTTAGCACCTTTACGCATATGATGGGCTTCGAAGCCGGCTTATGTATTTCGAAGCCGTTGTTATTTGATTTTTTGGCGCCAACATCTTGTCTTCGAAGCCAAATATTTCATTTCGAAGCTGGCCCCAATCCCGGAAAAAGCTCTTCCCTTCAAAACTATCAATATTGGAAGAGATTCCTCGCATTCGTACTTTTAGTACTTAACGACTC
>MSTRG.56609.1 Scaffold2384 622206-624162
AAGAAAACAAAGCTAAAAGGAAGAGAAATAGATAGAAGATTGTGTTACCGTGAAAAACAGAGTTTCGTGATTCCAATTTCTACAAAATCCTTGCTCATCTCCTTAATCGTTCACTATATGTTTTTCGTTTTAGCCGAATACAGTCATAATTTGATGTAAATTTTGAGACGAAATGTGTATAAGCAGGAAATGGAGTGATTTTCCTTCTTTGCCCTTAGTTCGTATTCATATGTTTGTCACAGTATTGACTTCTGTTAAAGACTTATACAGTAAAGTAACAAAAAACGAGACATTGACACTTGACCAGAAGAGAAGGGGGGGTTGACTATCACAATTTGATGTGTCCGTATCAAAGCCCGACTAATCTCCAATAGTGCTTAGACCCTCGGCAAGGAGTTTCCCACAAGTGCATCATAGTCAATTTAAGGATTTTCTCCCAATCCGATAGCCCCCCAAGGAATTGTTAGCACCCAAGAGGTTTTGATCCTTGAACCTTGGAGGAAGCATACCTCAAGACCCAAGGCCTTGCCACCAGGCCAACACCTTGGGGTTGAAAAGTGAAAGAGATTGCTATGATCTTATAGGCTCTGTCAAACTATATGATCTAATATGTAAGAGTTCTAATGATCACGGCTCCACTATTTCCTACCATGCTAAAAACTTAATTAAGTATTCTTGATCACCATATAAGCATTCCTTTTTACTTTTGACTCAATCCTCTTTACACTATGGGGTTAAGTACACTCTTTGATGAACTCAAATCCATTTTAACTAGATTTTACTCATAGAAAATATGTAATATCATATGACTAAGGCCTTGTTTGGGGTTGGGCTTTCATAGTAACTTTGACTTTTTTAGCGAAAGAAAAAAAGTTAATGTGTTTGGAAATGACTTTTTTTAGTTGTATGGAAAAACGTGAATGACCAATGAGTATAATTTGACTTTTTAATAGCTTTTTGGCTTTTTATCCAAAAAGCCAACTTGCCTAACAAGTTCTAAATTGTCTTCAATACCTTTCTTATTTTTTTGCCCCTTAGACTAGGGGTGACTCAGTTCCTTCCAAAGCATGTGCACAACCTAGAGTTCTATGAGTTTTATATGTATGTATGTTGGTAAATGCGCACATTTGCATTTCTATACACAAGCATGCAAGTATATCTTACATTTTTACTAGTGTGTACATATATATACATATGATACGCATCATATGAGCCAATATGTATTTTTGTGCACAAAATCTGTTTTTGCTTTTGCTTAATGTGCTTCACATTTGTGTACTTATAACAGGTAATAAAACTTTTTAAGGAAGATAATAAAAGTAAAATTCAAGCACATCAACCAAGTCTACGTGTAATTAAGGGTCAAGGGCTAACAGATTGGTATATGGAAATAGTCACCAAGTTCAATTCCCACTAACCACATATACCTGAAGCCGTTTAAGGAAGATCTCAGCTCACCCAAAGTGATCCCAGCTCACGAGCCAAACCCATCCTGGTAACACAGACTTGCTTAAGTGTCTATTAATGAACACTAGAAGGGTGGCAATCACAATATGAGTGCACACAAGCATGAGCAGTGTTTTTAAAGGCTCAAGGCGCACCAAGGTGCCAAAGGTCTCTTAGGGCCTAGGCGTAAGGCAAGGCGCAGGCTTTATTGAAGCAATGCGCACAATCTTAATAAAAAATAAATAAATTAACATAGACTAATGATTCATAGCATGTTTGTACTAAGACAATTTAAAAATAATAATAATAAGGCAAATTATAGAATAATTCTCAAAGTCATGAAAATGCATATTACATAGAATTCCAATTTTCAAAGATAAAATAAT
>MSTRG.16261.1 Scaffold1343 1108123-1156713
CATCCTTAAATTTATCCACATGTGGTAGGAGGTTAGATCTTAGTTGATTGATTTCTAAGACTATATTTGGATTAAGAATTTGACGAGGAATTTATAAAAGGAAATGAAATAGGAAGGACTAAAAGTAAAATGAAATAGAAACTAATTTTGTTGTCCCATTTTCATTTTCCTTTTCAAATTCCTCATCAAATCATTGATTCAAACACAACCTAAAATAAATCAACGGCTTATAATAACAACCCATGTTGGGAATAAACTATTCTAAACATTTTAGGGGGGTCTTAAACATTTTTTTCATTAATTTTGTCTACATTTGTCATAAGGCTAGTTAGATCTTGAAAGTTGTGTTGCATACACTACTAGAAATTGGTGAAATACTACTTAGGATGGCATATGAACATGTCCGTGGACAACTGGACAATAGTTAAGGTTCCATTCGTTTTGATGTAAAATATTTTATACTCGAAAATATTTTTCTTCTAAATTGAAATAAATAAAAAAAAATGGTTGACACTTTAAAACCAAAAATTTCTCGTCACGTGGATAGAAATCAATGAAGAGTCACCATTTTATCTTTGAAAAGATTAATGTGCTTGAAGGGCCTAGTTGGAAGTAAACTTCCTAAAAATCAACTTACAAATTCTTTAATGGCAAATCATTTTGGGAGATTATGACCAAAAATATTTTTCCTAAAAAATGTTTTACTTACTTTTGGTTCAATGAAACAATGGAAAATATGTAAAATATTTATGTCAAAACAAATAGAGCCTAATGAAAATTGTATTTAAAAAAGTATGAAATTTTGTTGCGTGGTAGTAAAATCTTGTTGGGGGTGGGAAATAAAAATTAGATTTGTCCGATACTTAGACTAATATCCACACCCAACAAATGTATCCAAATTCTTGTAACAGATAGCATTATTGTGAACCAATTCTTCTTCAACAATAGTGAGTTCTAAACATTTTTTTTTTCCACGAAACCTCTATGTTTTTTTTTTTTTTTTAATTGGAAAAAGGTGAAATTTTATTGATGCGGCAAAAGATGACAAACTTATATCAATAAAAAGCTAAGCTCATTAGCATCATTAGAACATACCACCTGCCAATTACAATAACCAAGGCCAAGAGAACAAACAAAAGCTAGTTGGCCTGACACCAACTAAAACTCCCTCTATAAAACACAAAATCCCCAAGATAATACTAACTAAACAAACACCCCCAGTACATAGCAACCCAAAATAAACAGGAAACAGCTCCTCTAGATATTCAACAACTATAAAGCTGTTGGAAGAAAAACACTACTGTTTGTGTGTTGTTGTAATGTTTAAAACAAAATTAAAACAAATCAGAAATACAACTGTGTTTTGTATAAACCAGAAACCAAAACACAAAAACTCTTTGAAGCAGAAAACTGAAAACCAAAATCTGTATTAGAAAGAAAAACACAAACATTATTTTGTGATTCTATGACAGTGTTGAAACAGAACAGAAACAAATATCCAAAAAACAACTCTGTATAAATCAAACGGAAACAGGAAAATCTTACAGTTTGTATGAGTGCAGAAAATCAGGTTGATCAAAGCTTAGTGTTTGACACTATGCACAAAATTTCGTCCCTTGCATTGGTTCTTACGAACTTCTTGGACGCATCAACATGGCATGCAATATGTCGCCAGCCGTAACTGAAGATTTCTGTTACAAGAAGAAGAAAAGATGTTCTGGTGCAGTATAAGTTCCTTCTTTGTGACATATAGTTTGATTGCAATCAGCCTCTTCTAGTAATAAAAAAGATTGTAAGTGGTTTCTGATCACTATTACAAGCTTACTTGTAAAATTCATGGAGGGCACTGTAAATTTTCCCTAGTATTATATTTTTTAGATGAGCACACTGGCATGCGTAAATTTTAATTTGTGCAGCTTTATGGATTGTGTTCTTGTTCTATCGAATTGCTATTCAGATTTTCTTCATGACTATTTATGTCTTGATGTTTCCTACCAGCAATTGCTTCGATTACAGAAAAAT
>MSTRG.129244.1 Scaffold650 578090-579406
AAAAAAAAAATTATAATTTTAAATATCAACATTTATAAACTTTATCATTGATTTGTAATTAACTTTTAAAATACCCACTGAAATTGTTATCTTCCCAACTTCTGATCCTTTTGATGCTCAAAAGTATTTCTTCTCCATACCTTTTATGAAAAAACAAATGCAATTGAAAGAACATTTTAGCTCACAGATTGGGCTGTCAAAACATTTGTATCACAACACAAACTTCTACTATTTTCATTTTTTTTTTCCCCAAAGGCAAATGAAATCAAATTATGAATCAGATATATGACATAGCAGTTGATTTCACGAAGGAATTATCTCATTCCTGATCGACATATAATCCAAGCAGCAACAGGAAGTTGCATATTCTTTTCCAACCTTCTCAAATCAATTTCACATGTAATCATCAAATGCTATAACAATATATACAATACAGACCTCACTATCTGCTTCTCTCAACTCTGCAGCAGTATTTGTGTATCTTCTTTCACATTATATTTTCTACAAAATGGTATAGCCAAGCCAAGCAAACCAAGCTTCACATCTCATCAGACCAATCGCTTGGTTCGCCACCATCGTAGAACAATCCATCAACAATTTGGTCGATCAATGAGTCGATAAAACTGTTACAACCGACGGTGAATATTCGCCCCACTCTGTTCCGAGCGCTGGAGAACCATGCAAAAGTAGCAGCGCAGGTCACGGCTGCAAAACACACCCCTGCTGCCTCAGCAATCCCTTGTAATTCCATTTTCCTAAACAAGGAGTTTCCTGTCACCACCTCTGTTGTCAATGTCACTGCAAACACAATCTTCACACAAATTGTTTCGTAATTTTAGTGCATTTCTTTTGAAATAACCTGTTTAATAACGCACTTGGCGAGTTGGTAAAACAGTGCTATTGATCTTGTGTTCTTTTTGTTTTTTTAATGATTGAGTGTCCGGACTAACTTTATTGATCTTCTCTTCTCTTCTAA
>MSTRG.138104.1 Scaffold7475 206001-217153
TCAAGAACGTCGTTGGAGAATTCGAAGACCTTCGAAGATCCTTGAAGAACAACTTCGAATTCTTTAAAAGATGATGAGAGGCTTAGATTCTTCAATAGTCTCAACTCAAGAACACAAGAGTAAAGGAGATGATGGAGATAAGAGATTGGGTGAAGAAGAAGGCAAAATGGCTAGAGAGAGAATAATGGCAAGGCTCTCCCATGGATCTCCCACTTTCACTCTCAAGGTTGATAATGGAGATGGGAAATTAGTTCTTTCCCAAGAGTTAACT
>MSTRG.17266.7 Scaffold1366 3317819-3330742
CAAAAACCTCGGGAGTGACCAACGCGAGTTGTGAAAACTTACGGAACTAGCACGGGACTCCTGGTTTGAAAACTAAGTTGGAAAGACACACTTTTTCCACACTTAAGCTTGGAAATCGGACCATCGGGGGTGCCAAAACCGTGCAACAGTCACGAGAAGGACCGGGAAATGCCCCAAACACCTCGGGAGGGTCCAAGGTAATTTTCGGAGACTTACGGAACTAGCACAGGACTCTCGGTTTGACAACTAAATCAAAAAATGCACTTTTTTCACACTTAAGCTTGAATAATCCCGTGCCTATTCGTTAAGTTTTCATAACTCAAATTGGTCCCTCCTGATATGTTCGAGGTGTTCCCCTGGCCTTCTCGTGACTGTTACACGATTTTGGCCCGCCGAGGACTATTCTAAAACTTAAGTGTGAAAATAATTCCTTTTCCGACTTAGTTTTCAAACCCGAAGTCCTGCGCTAATTCCGTAAGTTTCCAACACTTACATTGGTTTCTCCCGAGGTGTTGAAGATGTTCCACGGGCCAAAATCCTGACTGTTTACAGGATTTTGGGGGCCCTCCGATGGCCTATTTTCAAACTTAAGTGTTTAGGAAGTGCATTTTTTGACTTAGTTTTCAAAACGGGTGTCCCATGCGAGTTCCATAAGTTTCCACAACTCGCGTTGGCCCCTCCCTAGGTGTTTGCGGTGTTCCCCGGACCGTCTCTTGACTGTCACATGATTTTGGCCCCCCGATGGACTATTTTCATGCTTAAATGCGAGAAAAGTGTCGTTTCGGACTTAGTTTTCAATCCGGGAGTCCCGTGCTAGTTCTGTAAGTTTTCACAACTTACATTGGTCCCTCCTGGGGTGTTTGACGTGTTCCGCGGGCCTTCTCGTGACTGTTACACGATTTTGGCTCCCGACGGCTTATTTTCGGGCTTAAGTTTGTAAAAAGTGCATTTATTGATTTAGTTCTCAAACCGAGAGTCCCG
>MSTRG.83669.1 Scaffold3418 223251-223627
AATGAACCAAAGCTTCAATCATGAATTTCTGATTTCAATTATAAGGCTCTACAACAACTTGCAAAAATACATTTTTTAATATGAATAGCAAAAATACATTTTTTAGTATGAATAGAAGATTTAAGTGCCCTAATCTACCGATTACAAACATGTCATAAATCACTTGTTTGCAAAGAGAGCCATATGCAATAGAAAATCTCATTCATCCAATTAATTAGCTATCAATAAACAACACAAATAGTACGTCTCACATCATAATCCAATACATTAACGAGCTATATCCCTTGTTTGGTTAATCAGAAAAACATGCCAGAAAGAAAAAAGAAAAGACAAAACTTTCCACTTTGTC
>MSTRG.121484.2 Scaffold572 16320-19718
ATTACCAAGTAATTCATAGAAAATAGATTTAAACCACACGATGTAATTAGACTAGGGAGTACTGAAATATACAACACACAGAAATAAACCCAAGAAACATCTGATTTTTGGAAATCGTCTTACTTTGACTTAAACTAAGTTAACCTTTTAGAGAAGAAAAAGTTACATTCATGCAGTCATTATCCATAGTGGCTGTCCAGTGATTTTAAATGCTCAAGGCACACCAAGGCGCCAGATTCAGGCGTAGGCGCAAGGTGAGGCGCACCTTTTTGGTAAGAAATAGATAAACTAATAATTCAAACTTGAACAAAAGCAAAATGAAAGAACACAGGTAAATTGTAGAAGAATTCTCAAAGCCATAAAAGCCACATATCATTCCAAATGCAAAATAGTCAACATTCAACAAAACTAATAATTACTAAGCTTTACTCTAATAGTCATTCTGTATCAAATTTTATTGTCCTTAGATAATTTATTGCTTGTACCAGAATAACCTAAACATTAATAATCACAACATTATTTTAGCTAACAGTTTTTAAAGTTAGAACTTTAATTTTGAAGTTAGTAATATTAATTTCACTATTTGACTTATAAAAATATGTCTATTATATGAAAAGTATAGTGATACGGCATGCAAAACTAATACTTGATGGAGAGGATTATTTCATCGTTGGCGACATCTACTGACCATAAGAACAATTCAGCCCACCATAAAACAAACTACAGCTTGATGGTAGTTAAATTTTCAAAATTCA
>MSTRG.117480.2 Scaffold5350 60098-61809
CATATGTCTGCTTAGAATTTGCTAGGATTCAAAAAGTCAATTTGGGTACTTCTCTTGATTTATATGCAAACATGGAAGAAATTCTAAAAAGTAATAGATTCTCAACAAAGTTTGAATTCATCTACCACCAGACCTGCAGTTTTACAAAGGTTGAAGGTTACAAGGAAATCATTGCATTAATGGTTACAGAGTAAGTACTATTAGAAGGTGATAGTATTTAGTATTTAGCAACACAAAATTTTGTGCATAATGTTCTTCTTACCTTTGCCATACTTCTGTTTAATTGTTTCTGAAACAGAATATAAAGGCAACTGATGCCATATACCATATTGGAAATGCAACTGATGCCATATTCCATATTGGAAATGCCATATACCATTTGTAGATTGCAATGTTTTTTTTGATATTCGGGTGTCCGGGCCACGTTTGTAGATTGCAATATTATAAATTTGAAAATGCTCTTTCTATTTGTTCCTTGCTCATTTTTTGGTATGTTGTTCTGTTATTTTGCCCTTAATTGATTTAAATCTCATGTTTTTTCTTGTGATTGCAACTATGACAACAAATATCTAAGATTGGTAAAGGTTTTTGGTAATTTGAGGATGAAAATTTAACCGTTGATCTGTAAGCATATAATATGACAGTAGGGAAACATGCAGTTTTTAGTTTTTGAGTTTCTGGCTTTCTATTACAACAGGGTTTGAATTTGGACTGATGGGATTGACCTTTTGAATGCGATACCTTAAATTGGTTAGCAAGCATTACCGATGTTCTAATTATGGACTTTTTATGTACTAATAAGTGATTCCAGGATCTATTGTGGTAACAAATTTATAGTGATTGATTAACATTTTGCAGGTAACATTTCGCTGCCTCGCTCAGCTTCTCTACCTGTATTTCGTTTCTTTAGCATGAGATCGTTGGCCACAAATGAGGTGTAACCTTAGCTCATTGCTCATATCCAATGTCTATGGTGTCAGTGTTACTTTTTGGCACACTCCTTGACTTTTTGGCAGCAACTTGAGTTTTTCTCAACTCGATACGTTTTACTGCTTACTGGGCCTATTAAGTGGTGTGAATTTTTTGCATTACCTCCTCTGGGCTAGACTGCTACAAGTACAGATCAACATGGCGACAACAATGATAGTGAAATTCAAACAGTGAAGTAACTACAATATGACAATTCTCTAGTCTGTTCATGTTCTCATCCAGTGGTCGAAGGCAATTCTCTAGAACTTTGACCTCGACATTTGATATCCTATATGACGACTAGTTTTTGTTTTGAACTTGTTTTGGCAAAGATGCATTTTGTGTTTTAACATTCATGCAATATATGGGCATCATTAATTCCATTCATCAAAAAAATCTCCCCTCATCTCACAATTAACCGACAATTCTGGC
>MSTRG.14124.1 Scaffold1290 3267750-3268868
CTTTCGTATGGATTGTGTAATGCAATCAAACCCTAAGTGTGATGCCTAAGAGATTCTAGGAGTAATTCCTAGACCTATCTCCTTCTCCTCCTTTCTTTCTTTCTTAAATTTCAGCACTTTCAGCCCCAGAACAGCCCTTACAGCACTGTCCTGCATCAGTTCTATTCTAGTGTTACTAGAAAACATTGATAGCCTAGCAAATTACATTAAGCATGATACACTTTCGTTCCAAAACTATAAACTTAGCAATCCAAAGCGATCCCATAGGTTTTTCCCAATATATTTCCTTATAATTCCGTTACGAGTTTAAAAAATAAATAATAAATAAATAAAATATAATAAATTAAACTATAAGGTGGGTGAAATTTTGAAATGACAAAACGTCAAACATAGGTTATAATGCTCATAGAAATGTGTTGCTATATGATTATTTATTTATGTATTTATTTTTAAAAAAACTACATTTCATTAGATGTTTAAAAGTTAAAAAAAATTCTCTAGACTGAAGTACCTTAAATTCTTAGTGTAAAGGAGTCTACTCCTATCATATCACAATTTAGAGTATGTGACATACTGCGTTCCCCTTCCCCGTTCCAGATACCGGAGAGATCCACGTTCCAGTAAATATAGCTCTATTCCTTCTCTTTCTCTGTGTGTAAAAGGATGTCTCTCCACTCCAGTCTCCACATATTTATATATGGTTAATTAAGAAAGTATAAAGCTGAAAGCTGAAAGGGGTGTCTTGTGTAAAAGGAAAAATTGTAAGAATAACTCCTAGCAGTATTTCCACTTAGGCAAAAGCCACTGCCACCATCTACATCTACATCTACACCTAGATCTACATCTACATCTAGAAGCAATCAACATAGTATAATAATCCATATAAAAAGCCATTTAAAACTTAAAATAAAAGCTCTAATCATGAATTAATCATAAATCACACACAAACAATTCAAACTCGGCTAATTAAATGAAAAACAGTCAAGAAAAGGAGAAACAGAAACAACAGAAAGATACCTGAATCACCAGAGACGAGATAGAGAAAATCAATTGCAGAAGAAATTAATGATCTCCCAATATTAAACAAAAGCTGAG
>MSTRG.119877.1 Scaffold559 562753-563041
CTCATCAGTCTCTTTCTCACTCTCATTTTCATCTGCATAGATCGACTCCACACCGATCAAACTCGCAAGATCGACTCCTCACCGATCGACCTCACTCTCTCATTGCACCGATCGATCTCATAGATCGACCTCGCAAGATCAACTCCTCACCGATCAACCTCGCAAGATCGACTCCTCACCGATCGACTTCACGGATAAGCCTCTCTCTCTCTCTCTCT
>MSTRG.90060.9 Scaffold368 2486769-2488581
AAAAAAATAAATGCTTCATATCTTTTTGTATCCGTATCCTGTTTCTCTATCCATGCTTCATAGCTTTTATCATTTCCCTTACGTTTCCAAAACGTTTCTATTCCCAAGTTAACCGAGACAACATACCGAAATAAAATTTTGATTCTTGTCCATTATTTGACTAAATAATCTTGCACATTTTAATCTTTCTGCGTTTGGCAGGTTTTGGTGGAAGAAAACTCTCATGGGATAAAAGTTTTGTTAAACAGGCCTAACCAATTGAATGCACTTTCATTTCAAATGGTATGATAATGATTATTAGATTAGTACCTTTTGTTATTCCGTTGTCATATGGTTGAACTATCTAATGCATTTGTGTTTGGCAGCTACTGCCTTCAATGACTGTTGGTACTACTTCATTTTATTTTTCTTTTGGCACTTCTTGATTCTATACATCATAATTTGTTATTTTTAAATCTTTTAAATAATTAATTTACTCTGGTTATCATAAGTATACTTTCATCTCAACTTTCTTGAATACCTTTTAATCCTTTCATGACACTAATTTTTGCCATATTTCTATTCATCTACTTTAAAATTCCTTGTGTCTTTTTAGCATAATCTTTTAATTTAAGAATGCAGGAGGTAGAGAGAATTTGTTTTGATGTAGGAAGGATTAAGAAACTAGGCCATAAGGTAGTCTACAAGGGAATTGTGGTGGATGTTGGTTTTGGAAGCTTCCAAGGTTAGGGTTGTAAGAAGTGAAGGAAGGCTTGTAGGATTTCTAGATGGAAAATGTAAGATTTAGTTTGATTTTCAAAAGTGGTAGCATATTGGATTTTTAGAACAAAGGCTATTTGAAGCTCAAAGCAATAAGTAATTTAGGGATTTAATTATAAATTTGAGGTTAATAGGTGGGGTATGGGGTTAGGGTTGATTTGGGCGTGATTGGGTGAGGTTTTGGAGATAAAAACATGATTTCTCTAGGGCTGTGCTTTGTAACCCGAGAATAATAACTTTGTCGAACAAAAGAGGAAGAACACTCTAGGAATCCCACCTAGACTTTCATAGGAGTTAACCCCTAAGGTAAGTGATGTGGAACGCGACATGGAAATTTTATTTATTTTTTAATTTTATATTTATATTTATTTATTGATAATTTAATTAGGATTTTAGTATATTTAGTTACTTATTTATTTTTTAATTTTATATTTATGTTTATTTATTGATAATTTAATTAGGATCTTAGTATATTTAGTTATTTATTTTATTAGAGATTAAGTTTCCAAATAATATTATGATTTAGTTTCTTATTTTATATTAGGATTTCTTCCCTATAGATATTGGGTTTTATTGTTTAATAGTTAGCTTTGAATTATTGATACTGAATAGAAGGTTGTGGCCATTTTGTGAGATTAGGGTTTTGACCCTTGTGTTCTTCTCTTTTCTTCTTAAGTCTTTTTATTTATTCTTTGGATCAATTCTCCACAT
>MSTRG.43194.1 Scaffold2002 507605-510838
GCAGATTAAAAGAGTGGCACACAAAATTTGTACTCTACAACAAACACAATAATTTATGTACATTAATTTAGGAAGAAGAAACGTAGCAAGCCATTGAAACAGCAAATGGGTCTCGCAAATGCGCATTACAATGTAGTGATTCTATCAATTAGGTGTCACTGGTGTGTAGATATAGCCATATATGGGGCTAATATTGTGTCCAGAAATGAATTACCTAACACGACCTGAACCCTAAGAGAAATCTAGACGGCCAGTGATGAAGTAGAGTCCAGACAAAAACCAATAATAGAGCAGTGTCATAGGCTTTCTTTAGGAAGGGCATGGAACAAGTACTCCCAGGGGACTAGAACAGGTTCAGAGGCAACAAAGAAATAGAGCAGCAGTGCCATAGGCTTTCTTTCAGACGGGGCAAGGAGTAAATACTTCCAGGGGACTGGGATTTTCATCTCCGTAACTGTGATTTTCTCTGCCCAGACCTATTCATCACCAGTGCTAACCCAGGATCTGACACCTAAAACGGTAAAAGATAGCTTATCCAACAGAATCTTGCCATGCGAGTAAGACAAGTAATTGCTGTACAAGGGGCACATGAAAATGTTCATCAAACTACCCATAACAGGGACATTTTTTTCCCCTCTTCGTACGCACGAAGTTCCTATCGAGTAATGAAAAGAAAAAATGAAAAAATAAATTATTTCACGCTAATAGACATACCACCACAAATAAAACTTCATAAATCCTGAATAGCACAGTGATGCCTTCTAGATTTCAATTGAAATTTTCAAGTGGCTGTCCAAGGCAGGGGCTTCCTAAAGCAGTTAGCAGAAGTTAGGTGAAGGCCTGGCAAAAAGCTTAAGCAAGCTCTGGGCAATGATGTTCCCGAACAAGGGAAAAGAAAATAAACCACCTAAAATAGTCAAAAAGCCAAAAAAGTCACTACCAAAAAGTACTTTCTACACGTCTTTTCGTAAAAAGCCAAAAAGCTAACTAAATTAACTAGTTCCCAAAATTTCATCCAAAGTACCTTGCCACATGAGAAATTGAGATCCATACAATAAAATGGTTAAATTTTCCTCTCTTTCACATAGTTGGTTTTCAGGGATGATTGTCCCATCCCATCCTTTAATCAAATTCTGGATTTGTTGAGACTTAGGTAGTGTTTGGTGTATAGATCCTTTCCTCTTTGTACACGAGCTGCACCCCCTTGATGCAATTTTTTCTATAGAACCTTGTGTGTATAAAAATTAAAAAGGGATTCACTTACCTGATGTTGGGCATAATAAGAAACATAAAATAATGATGGCTGGAATTGAATTCATGGTGGATCTTAGTCATAAAAAGCAAGTAGGCTTATAGTTTTAAAAGGTGAAAAAGTAGTATTAGGCTATGTGATGCAGGACAAAGTCAACAAAGGATGCCCCATGACCAAATATGATGGGGCTCGGGCTTTAATGTTTATAGTTTTGAACCAAGAAGGTTGAGTTTAGGTTTAGAAGGTTGAGTTTAGGTTTAAAAGCTTGAATTTGGTAGAAGTTTAGGCTGGATTTGGGTATGAAATCAAAAAAATAAAGACCACTAGAAATTCTGGAAAAAGGGTATTGTTAAGATATTTAAGCTTGCTAATAATTAGGGATGGCAGTTTAATATGAAATAAGGGCTGATTCCCGTTATGCATATTTTTTGAAAACAATCGAAGAAGATAGAAACGCGTACTATGTGTGGTAGGGAGTTAAGAAAGTAGGAGGGAAGGAAAGTTTCATAAACGAGAAGGCAAATCTTGCTACCTAGAATGAATGCTCCATATCAACAGGGTGAAGAGCACATTACCTACAAAATTCACAAGGGAAGTCTAGTGGATTCATCTACAATTAGTGGGTGTGACAAATTAAAGAGATACAATATAAGATGCCTATATGGCCACCCATGTTTAATTAAATGTAGCTAAGCTTCTAACAGTTAACATGCCCAAATAACCCTGAAGTAACCGTTACCAGAGTGAGTGTGACGAGATGGACGAATCGCATGATGAAATAATAAAATAAGGGGAAATAAATTTACGAAACTTAAGGGTCACAAGTCCAAAAGGACTGGAGAAGAAATATTGTTTTTAAGTCAAAGGAACTATAAAGATAGGAGAAATTGACAACAGAAAAAAGTATGACAAGCTTCAATTGAACAAAATACATCCCCCATGCTAAAGGTAATAGTAAATAAAAAAAATTCAGGCCACACCCATTAAAAAAATGTTAAATTGAGATTATATATTAAATTGTTATGTTTCTTAAAACATAAATATGTTTACAACAGTAGACGACACATTTTACTTATCAACCTTTTGTCATAATGAACTAAATTCTGTGTCAGAAGTCACAATTTATGTGAATCAGCACAACGATTTAC
>MSTRG.49314.1 Scaffold2170 679869-680199
GTTATTAAAAAATACCTTCAACATCACAATCCCAAACTTATTGAAGGTAACAAGTTTCATGAAGAAACAAAAATTGCAATGAATTGTCCCCAACAAGTTGATCTTTCACTTGATTGTGGTGTCATAGTTTGTTGCCTCATGAGAGAATATGTCTGTAACAAAGACATCTTTCCCAATTTAACAAAAGAGCAGTGCCAGCAAATCAGAGCAGATATCATAGATGCTTTGTTGACTAACCAACAGACAG
>MSTRG.26361.2 Scaffold1598 1275632-1276226
TGCCGATCGAATGAAGTACTTTCTCGTTGTATTCGAGGCCTAGGGTTTGGAAGATCGGGGGAGTTGAGAGACCTCGGGGCGAGAGAGGACACGGAGGGTTAGGTTAACCGTTTGGAGGTCCTTGGTGCCGGAGATGGAGGAGAAGGTGTGGGGGCGAGTTCGGATGTCGAAGATGAAGGGCTTTTGGAGCCATAGAATGAGGGTTTGAGAGAGAGAGATAGATGTGAATAAGAACGAATTAACTAGGGCTTTGTTTCAAAAAGAAAACGCAGAGCAAATTATTAGAGAAGAGACCCCGTTTAGTAAATTCAATCTAGG
>MSTRG.1913.2 Scaffold1044 233184-234337
CATTTATTAATGTCAAAAATAAATATAAATCCTTTTTCTTAAAGGATAATGTTAGTAATAAAAATATTTATTATGTGAAATAAAATGGTGCTATGTGTAACATAAAAAAGTATTGCATAGCAACTATACGGTATTAATATATATATAAGATAAGTTCAACATAAATATATAAGAAGTGTCCGATGGAAAGTGTTGAGCACATATCCCACACCCTTGTCCAAGTGTCTGGTATTTGACATGGGTATTTGATTTATTCTGGAGAGTCCATGCAACATAGTTGTCTATTACTAATTGTAGATTATAGACCCGTCATTGTATGGCCCTTACAGACCCGAGGGAGTGGGAGTTCAATGTTGATCATTATATGATTATAGAAAATATTGGGTAGTGGAAAAACTTTAAGTGACAAAAGCAGCCTACTGCAACAAATTGAACATCAGGAAAGTTGAAGAAAAGATTTATATCACACCTAATTTAAAAAGTAATAATTGAGGTTAAGAGTCTACTCTCTCTCTCTCTCTCTCTCTCTCTCTCTCTCTGTGTTTTTGGTGGGGGGAGGGGGGATTAGTAGACCCGTAGTGGTATCAGCAGCTTATCACTCATATTGAGCATATTTCAATTGAAAGGTACCATGTAATTTAAATTAAACTACTGTTAAAGATTATCATTTGTACATTCAAATAATCTACTAGAAAACCTTATTTAGAGTGATTAGGGATGGAGACTTGGGAGTATATACTTGCATTCACTGAAATAGTGTTCAGCATATTTTAGGCGTTGCATCACCTTTTCACAGAGGACAACGTACATGAATATTCTTTGGAGCAGTTGAACCTATACTTCAGTTGGTATTCCTGAGAGTTGAATACTTTATGTCGATATAGTCACTAGCACAATGTTGTTTGACAGTCATTTTCGATAAAATTTCTTTACCTAAATG
>MSTRG.65197.4 Scaffold27 488684-489397
TAGAAACTAACCGGAATCTATGTCGGGACAGTTTACAGAGTCTTGTCGGACCCTTAAAAAGTCGCACCCTCAAAAGGCGTGCCCAATCCATAAAAAGGCGTGCCATCAAAAGGCGTGCCCAATCCATAAAAAGACGTGCCATCAAAAGGTGCGCCAGACACGCGGCGATGCACGTGATCGACAGTGCGCGTGTCGGCCTCTTCGTCATGTGCTATATAAATGAAGGCGGAGGCTGAGAGAACATGTGGAAATCAAACCAGTCTGAAACCTCTGAAAAACTCTTCGTGGGCTGAGAGAGATACACTGGTAACACTCTGTAAACACTCTGTAACCAACCCATCTCTGAAACACTCAGCAACCATAACATGGCCTCTTCTTCCCGTCCAGCTACCCAGAACATGGCCTCCTCTTCCCGTGGTCTGCTTACGCTCTTTCCAGAACTGAACGAGTCCACAAGAGAAATAACTGGTGCGGTGGCCAGTGAACCCCAACTAAACACTTCTGGGTTTGCTCCTTTGAACTTTCCGATGCGG
>MSTRG.37968.1 Scaffold1857 2386625-2389201
TTTTTTGTCTTTTTGTTTATTTGGGGAAAAATATATGTTTGTAGTAATCCAGTATATAGACTTGGTTGTCCGTTGAATAATGTGAAATTGCTGCTTTTGTTGCTAGTTTTTGTATAAGTTTGTCAATTATCATTCCTCATGCTGATTAAATCTATATCACTTGCGAGCTTAGTGGATTAGTGAAAATAATCATTGATTGTTCTTTTACTTAATTGTATTTTCATATTGTCTAAATTTCACCTTTTAATTTACAATTTTATTTATCCATAGCAGAAAATTGTAAAAATTATCGAATGTAACTTGGTATAAATCACTAGCACATAAGATATATAATACCAGTCAAATAGATATTTACAAAAAGTTATACAAAATGAAAAGATACACTCCATATGTGTATAGTAATATACATATAACATAAGATACAAATTGGTAATCTGTATCTATTTTCCCCTGAACATATTAAAGTATAAGATACATATCGCGAATTGTGAGATACTAACAACACTGATTTTTAGCAATCCAATGAATTGACTTGTAGCCTTGTTGTCTAGTGAACAATGTGAACCTGCTGCTTTCGTTGCAATCATTTGCATTAGTTTTTCAATTTGCATTCCTGACGCTGATTAAAATTTGGATCACTTATGAGCTTCTTGG
>MSTRG.3415.1 Scaffold1067 1546098-1550714
AAAAAGATTAGTACTGTAGATAATCCGGCCGATATGCTCACAAAAGTGGTTTCTGGGATCCAGTTCCAACATTGTTTGGACTTGGTCAACATCTCTCGGAACTAAGCACCTTTGGGTGCAAGGCAGTGTTGATCGATCACTATGTTGGATAAGAGAATCCTCGCCAAGGTGGAGATTGTTGAATATTGGCTACAGATTCTAGCCATGTGGTGGAAAGTGGCAGCCAGCTACATGATGGGGAAGCCATGAGGCCATGTGAGTTGGCCATGAGGCCATGTGAGTTGGCCATGAGGCCATGTGAGTTGGCCATGAGGCCATGAGAAGCCATGTGAAGCTTCAATCTGTAAAGCCACCGAAAGCACAACAATGGGCTGGCAGCCAGCTCATTTCAAAG
>MSTRG.8796.5 Scaffold1175 1723037-1723440
ATGCCCTTTGGGTCGTGAGTTATTCTTCCTCTGAATTTTCCGATTGTGCGGATGGCCTTTTGGAGTATCGGTGATATCGGTGGTGGTGGGGGAGGTGGCAGCGGCGGCGGTGGTGGTGGGGGAGGTGGTGGTGGTGATGCTAGTGGAGGGAGGCTACAACCGCAGTCATTTTGGTAGACAGGTGGGCTAGTGCCACCACCTAATGTGGGTTGTGGTGCTTCAGTGTTGTTTTGAGTGACTGAAGAATT
>MSTRG.100045.1 Scaffold4138 3033700-3039283
CAAAGAACGAATGCTATAGAAACCGTGAAAAATTTGGCGCTCTAAATTTGTTGCTATTTTTCCATTTAGTTTCCATCTCTTGCATGACCCCCTCTCTTGCGTTGTATTTCTTCTAAGTAAAATCACAAATCGAGCATAAAAAAAAACCCTAGAAAACACTTGAAATTCGTTTTAGGTTTTTGCCTTTGATTTGGCAAGTTTGTGTCTCCGATTGGACGAGTTGGTCGATTTACTGGATTTGAGCTGTAGAGAGTTGAGGCTCTGTTCTTTATCGTTGAAGTTTATCAGGAAAAGATGTGGTGATTCCGCCTAACTGAAGGCGTGGAAGTGTGTGCAGAGAGCATAATGTGCTCATTTGCTGTGACTCTGATTGTAAGCCAAGGGCTTTGTATGTGTGGGTTTGAATAACCGTTTTGTGTAACCAGGCTCAAGCCTTGGAAACTTGTAAACCATTGGGGGTATTTGTTGTTTAATTAATTGTTGTTGGATTAATTGTATTACTGCATGAAGACTATTTACATCATGTAATGCAAGTATGAGGATTTATTACCAGTTTTACTTTAAAAGGGCATGACTATTGTATTATTATTTGGACATGAAAATTGGGGCGTTACAAAAACCACTATATTTGAAATTTATCATGTTATTATATATGAGAACTCACCAAGGAATGAAAAGTTTGGTGAAACAAAAATGTTGTATATAACATCC
>MSTRG.30800.1 Scaffold17 603748-604454
ATGTTATTGCATTGCATGATTGAAAATGATTTGTAAGCCATGCATCGTTTTGAAGCTCGATTTTAGAAAGAGAAAATGACATTCATGTGTTCTTCAAGAAAATCTTGTTTTGATCCGAAAGCTTTTCGACTAGACTCATGTTTTGTGTTTGTTCTTGCATGATTTTCAACTATGGGTACCCAGGTCCATGTTTTCAAACTTGTAACATGAAAATCCCAGATTTGTGATGACAGATTGGTATCATCGAACATTCATATTTTCCATGTTT
>MSTRG.154505.3 Scaffold98 2450698-2452765
TGTGCAATGTTTTTATCAAACTTCTTTAGCTGCTTGATGTTTTACATGCTGGTTTCTTTTGGCGCATTATCAGATCAATAGGGCATGGTTGTTTCTTTCTGATTTGTATATGAAGGGAAGCTTCTCTTAAGGCCGACTGCAACCAGCTGTTGTGTTGCCGAGATGAATATCATCACTATTACACCATGTTGAGTATGAGCGGATTGACTAAACTTAAAAAGTTGTCTTTTAACAGGTGTGCTGTGATATGGTGGATTGAGAGCTGATATTGTGGTTCCCGACATGGGTTAATGCATACAGCAAAAAGTGGATGTCACTCCCATTTTGTTTTTGTTTTTTTCCCCTTTTTTTCCCCTTTTTTTCTTTTGGTTTTCTTTTTTCTCTCTTTTCCTTTTGTTTCTTTTTCTGTTCCTCTACTCCCCCACCTTTTCTTTAGGTTTTCTGTACAAAGAATAGACAAGGGAAACAGACACCAATCTGACTGATAGATTTGAAAGTCACAGGCAAGAATTGCTTTCTTTCACATGATCTGATGTAGTTGCTTGAACTATTGGTTGTTTTGTGGTGATCTTCTCAAATACCTTTGATTGTGAGGTCAGAAGATACTTTTAGTAATGGTAAGATGTTTGGTGTAATTTGTCGAATTTCACATCTATCAAA
>MSTRG.136445.1 Scaffold7286 929755-1209356
AAAAACAAAAAATAAAATAGAACTATTAGCTTGTGAAGTGAATGTGGAAGTACGTACAGTGTACCAGGTAGAGAATCCATTGCTGGACGAAGAGTGAGTTGCTCAAAGATCACTTCACCATCCATGTGTACAACAGGGACACAAGCAATCTTATGCCAGTCCTGTCCTTTCCCCTTGAGGTAATGAGGTTTTAGCATTGGACAGCCAAAGAATTCCAGCATAAAGAGAGAGGTGGGAAGCCCCTCTTCGAGCAAGGATTGGAGCTGAG
>MSTRG.23061.1 Scaffold1509 224576-225048
GTTCATTCTTGTTCAATATTATTTGAGAAATCTGTTTTGTTCATTCTTGTTCAATTTTTGATGAATTATTTGAGAAATCTGTTTTGTTCATTTTTTGATGAATTATTATTTGAGAAATCTGTTTTGTTCATTTTTTGATGAATTATTATTTGAGAAATCTGTTTTGTTCATTCTTGTTCAATATTTTTATATAAAACTTCATGCATTCTGGAAAATCCCAACTGAAAGGGAAGGAGGGAAGGAGGGAAGAAAGAAAACAGTTTCATTTTTGGTGACTTGGCAGATTTGGCAGCTGCCAAAGTAGTTGTCAAGTTTGGCACTTGATTTGGCAGCTACTATAGCATGCCATTGGAGAAGCAATTTTTGCTCAAGCTGCCATATTATGACTTTAGCAGCTGTTATAGCAATACATTGGAGATGCTCGCT
>MSTRG.50623.1 Scaffold2220 358783-363576
AGATAGGAGAGTAGCTCAATTTATAGAAGATGAAACTTGGTGGACAAGTTTCTTGGAGGATCCTTCTTGGAAGTTGCTTGGAGGCTCCTTGGAAGATGCTTGGAGGATAGGTATGAAGACTTGACTCTTGGAAGACTTGAAGGAGACTTGACTTGGCAAAGACTTGGAGGATAAGAATAAGAAAGGAAATTAGTAGGCAACTTCCTTGGAAGACTTGGAGACTTGTAGAGAAAGACAATG
>MSTRG.118574.2 Scaffold546 1258540-1266500
CATGACCATGGGTTTAAGTACGAGAACTCATATCACTTAAGCTAAGTACACATTATAATATTAATTTCATTATTATTATTTTTTATTCCTACTTATTTAAATTGCATACACATCGTGTGTGCCACCCACTAGTTTCTATATAAACGAAACTCTGTCCAGATCTTCTCTATCTCTTCCAAACAACTTCCAGATCTGGTGAATCGACCGTAAGCTACGTCCGGTTTACCTCAGATTCGCTGTCGCAGGCTCCCATTCGTCTTCCGTCGTCATTCGTCGTCCATCGTCTCGTCGTTCTTCGTACTTCTTCAAGAGACAGGTGAGAGAAACGAGAGTGAAGAGATAGAGAGGGATGAGGCGAGAGTGAGAGAGAGGTGAGAGTGCTGATTTCTTGCAATTTGTTGAGAGGCGAGAGTGAAGAGATATAGTGAACTACTAGGCGGAGAGAGAA
>MSTRG.138883.1 Scaffold760 225464-250654
CATAAATTCGAACATAATTCTATTTGCTATGTTAATATTTGATGTGACAATATAATATCATGTCGATTAATAAGACAACTAAACCATTTGACATTTTTGACTTGTCAATAATATATGCCAACACCAGACAAAAATTTCCTGCCCAGTGTCAATATTGAATGATTGCTATAGAAGCAACTTTTCAATGAAATAACAATATACTAGTATATGCAACAATCCCACTATTGGAGGTAAAATCTTGTGTAACAGACACACCACGTTGATATATTTCTATTATGTAAATAGACCATCATGATGTACCCGTTACACAAGATACAAAATCACATTGTCGGATAACTTTATTACATAAGGCTAAAACTTTTGATTTTTTCACCACATGGAATGAAAGAACACAACTTTGAGCTCAAAGCCATGATTTCAAAACACAACTATTAAAACATAATATCAATCGTGTTTTGAACGCACGACTTTGGCCTCAAAATGATGTTTTCATTCCAGACCAATCAAGTTTGGTAATGAGCTTCTAAAACTTGCGTAATAAAACAATTTTGTTGCACCAGAAGTGACTTTAAAACACATGCTTTTTTTTTTTTTTTTTGATTGGCGAAAGTTAGTTGTTAATTGTTACATTAGCACCTATAGACATTAGCATCTCCACCCATTGAAAAGCACCAAGGGAAAATTGAACCCATGACCTAGTTAAAACACATGCTACTAATAAAAACTCCAAAATTATAGGCCTGGTTTGGGAACTTTAAAAAAAAAACCAAAAAGTTACCAAAAAAGTT
>MSTRG.40212.1 Scaffold1918 2496757-2497880
ATATATTTTGCAATTAAAGGTCAAGGTTTTGAAGTATTTTCAAATTTTAGAATATATAATTCTATTATATTTTGGAAGCTTCAATAGCAGAATGAAATGCTTTTGTCCATTGCAGAAGAGACTTTAACAAAGTTTCTTTCAAAGGCCACTGGAACCGCTGTAGAGTGGGTCCAAATGCCTGGAATGAAGGTATGGCTGTAACTTTGGAATAATATACGATCTTTTATTTGAAATACCTGCATTATTATTTTATTTTGTATTTCAAACAAATTAATCAGTATTGGTGAAATTGAGAGCTAAAAATAATTAAATTGATCTTTTCATGTCAAGTAAAGTACAAAACACAGTGATAACATTTGAGACACCTATAGCTGTTGGAAATGTTATCACTGTGTTGGAAATGATAACATTCGGTAGCTATAGCTATTAGAATGAAAATGTAATGTCTATATTTTTTTTTGTTATTTAATTATTTAAATCCGTGGTCCTAAACCGATCCAATCCGTGTTTCAACGGATTGGTTCGGATTGGTTCCACAATTTAAACGGATTGGATTGGTTCCAATTTTTCAAAAACCGTAGATAGCGGATTGGTCCTGGTTTTCTCCCAATCCGGACCAATCCGGTCCATGCTCACCCCTAGGT
>MSTRG.121741.1 Scaffold573 449135-458680
GGTGTTGACGCCCCAAAATCATCAAACGGGGTTCGATTTGCACGAAACTTGACACACACGACCGCCTAGGCACTAAAGACTTGTGGTAGAAGACGAGACTCGAATCAGGTTCCCAGTTTGGGAGTTCGAGCCAGATTTCGGTCTGGGCAAACTAGTTCCCTCAGAAATTTGAATTCGAGATGTTGACGCCCCAAAATCACCAAACGGCATTGGTATGGCTCAAAACTTTGCACACACGACCGCCTAGGATAGAGACTTGTGGGACGGGGCTCAAATCGGGTTCCTGGTTTGGGAGTTAGAGCCGAGTTTCGGACTAGGCAAACTAGTTTCTCAAAAAATTTGAATTTGAGGTGTTGACGCCGCAAAATCACCAAACGGCGTCGGTTTGGCACGAAACATGGCACACACGACCGCCTGGGCAGGAGAGACTTGTAAGAGAAGACGGGACTCCAATCGGGTTCTCG
>MSTRG.71855.1 Scaffold293 1356662-1358630
AAAGCTTTAAGTTAAGTAAAGGAATTGCTTAAATTTATTTTTGAATTGATCCAACATCCTTAAACTGTATTTTCTTCTCGAAATGAGTCAATAACCAATTTGTTTTTTAATATCCTTACACTGTCTAACCAATTTGTTTTTCAAAACACTAATCTATGTCTGGCAGTCTTTCCAGGTCAAATTTCCTATGAATTTCTAGCCTATCCAGCAACAGTTACAGGCTAATCATCATCCTCCAAGGGTGTGAATTGGTTGACATTGCAAAATCTAAAACATTACACAAAACTTCCTTTTTATTTTCATCTTATTTAATTTTCACTCTCAGGGATTTCACTCGAGCATTCAATCATAATAGGGTAAAAAGAAAATATGTTTACATGAGATAAGAATAAGCAATGAATCGCCTCAAGTTCTGGCTCTGGTCGATTGACATACCAAATCCAGTTGATCTTTTTGTGCAAAAGCTCAAAAAGCATGGTATGTGTTCTGTAACCTAGGTTGAAGTATAAGCATTTCCCAAGATCTGGATATGCCTCCCTAATGCGTATCATGGTTTCTGAATGCTCATTATCTGAAAATTTTAATACGCCTCTCCATGGACAGTAACCTGAGTACCTGCACAAGTTAATTATAATGGCTAATTAAATTTATATATCACAGAGTACTTCACAGCCATAAGCATTTTTGTGTCATTCTACAAACCTCAACTTGAATTCCGTAAAAAAACTTCTTCGGATTGAAGAAAGACACCCATCTGCTGCAATGAGCAAATCACCAACTATTTCGATGATTTCACCAGTTTGAAGGATTTTAGTCTTCACTTTAACATTAGACTTGTCATTAGAAACACAGAAAGAGAGGTACAAGTGGCCTCAGAGAGAAATATCTGTTGGTAGCGCATTGTACAGAGGACTGTGGAGATCAGCCCAGTGTGCCGCTATAAAATTTAAGTTTTCATCTCTTGCAAGTGTCCATATGATATTCTTGTCACCATCTGTTGCTTCATTCTATAGGCAAACAGAAACTTAAAATGAAAAAGAGAAATGAGGGAAAAGTTACTGATCCTGTTGTGTTTAAATTTAACGAGGACTGTCTACAAACCTGTGGCATGCCGCATTGTCTGTAGGTCACATGAGTAGCTTGTAAAATGAAGAGAAACTCTTAGAAGAAAAAGGAAACTTAAAATTTGACTGTTTGATAATACGGTCAAAAAGCCATTTCGATGACCATCTCATAAGGAGCCAAGACCACAAAGATCTCACGCAGGTGATGCCATTTTTTTACAGTTTACTTGATATAGAGGTGTACACAGAGGTTCAAATTTGGTAAAAGTATTTTTTAAGGGGCCTTGGGTGCAGATCAGGAAGCCACAACTCGTTTAAACTGTTCGAGTATATCCTCAACACGCTCCCACACATCAGACATAAAAATGTGAAAATATTATAATTCTCATATAGATAACGATGTTCGAATACATGACATATTACATGCTCTGATCTTGATTATGTTAAAATTTTGGAGACATCCAACCCAAGCTTGAGTGATTTAGGGCATCTCCAGCCCTTACCCTTTACCCATATCAAATTTATTAAATTCGAGTAAAAAACTACCAAAACTCAAATCAAATGACATTCAAATGTTTACTCAATTTTCAAAGCTATTTTGTGACTTTGAAATTTATCACTTAGCCATTACTAAAGCTTTTACATAGATATATGCTTAAACAAGCTTGTCTCTTGGGGTGATTCATATCAAATAAACATTTTATTCAAAAATTTTACTCAAGCATAGTTTTGAATAATATACTACTATATTTATCTAAATAATCCTCTATATCCTACAGTTACTTCTGATAACATCATACACATAGGTTGTTAGTATGTAGTAGATTTTGCCCCAAATAGCAATTACCAAAAGCTAATGCTACAAAAAGTATAAACAAACCCTAG
>MSTRG.83220.1 Scaffold339 236566-237377
GGGGAAGAGAGAGAATGCTAAAATTGTGTTAGAATTTGAGAGAAAAGAAAGTCTTAAAAACAAGAGAGTTGTCTTGCCAAATTAGCGAAGTTACATACCCTCTTACAACTTATCTTCCCTTGTCAAACCCACTCAAAACCTTAATCAAGGAAAGAGTATTCTTACCAAAAAAAGAGTGATCATAAATTTGTTCAAAACCGTCATTCTAAGCTCAAATTCCAAGCTCTTGAATTAAGGATTGAGATCATAATTCACAACCTTTAGGGTGATCAAGAGGAAGTTTGAAAATCAAGAAGTTCAATATTTTCTTTGGAAGGCTTTGCTAGGCCTAGTTGGCCTGTCGGTTAACTTCTTTTGGACAAGACATCATTGTCTTCCAATGTTGACCAACTTCTGATGGTTTCCAAAGCACATGAAACTTTTTCTTTTGTTTATTTTATTTTGAGTGTTTTGTAAGGTTTTTATTTTGCTGTAATGTTCTCCTTATCTCTTTCTAATTTGGTTTGTAATTATTTTTTCAAGTGTTATAATAATTTCT
>MSTRG.147380.1 Scaffold874 104073-107100
TTACAATTCTCTGACAATCTAAAACATACATACCAAAGTACTTACAAACTACTAACATCAAACCCATAAATACATTACCAAATCCTATGTCAAAATATTTTCAAAAACACAAAACTAAATATTTTGATGCTAAACATCAAATCTATAAATCATTTACCAAAATCCTATGTCAAAATATCCAAAAACACAATCAAATCTTCTGATGCAGCCCGAACTGTTTTCCACCATTGCCAATCTATCACATGAAAAAAGAAAACAATATTAGATTGACAAAAAAAAAAAAAATCAATATGAATTTCACAATTTTGATTTTAATTTTGTAACGGAAAGTCCAATTGGGTGTTGTTTGCTCATACAAGTCTATTTAGGCTTAAACAAGTTGCCCGTGCCAAGTTTCGGTGGTTTCAGTAGTCATTTTGCAATTTCGGCCCCCGAACGCGCCTTTTAAGTCTTGTGTTTTACATTTTTTCTTGTAATTTTCTAACCGGAAATCCAATCGAGATTTCGTTTGTTCCTACAAATCTATTTAAGTTTGAACAAGCTGTCCATGCCAAGTTTTGGTGGTTTCGGTGGTCATTTCGCAATTTCAGCACTCGAACACGCCTTTTAAGTTTGTGTTTTACAATTTTCCTTCTAATTTCCTAACAAGAGATTCAATAGAGGTCCCGTTTGTTCCTACAAGTCTATTTAGGCTTCAAAAGGCTGTCCGTGCCAAGTTTCAGTGGTCATTTCGAAATTTCGGCCCCCGAACGGGTATTTTAAGTCTTCTGTTATACATTTTTTCTTGCAATTTTCTAACCGGAAATCCAATTGAGGTCCCGTTTGTTCCTACAAGTCTATTTAGGTTTGAACAAGTTGTCCGTGCCAAGTTTCAGTGGTTTCGGTGGTCATTTCGCAATTTCGGCCCCCGAACGGGACTTCTAAGTCTTGTATTTTACAATTTTCCTTCTAATTTTCAAACCGGGGATCCAATCAAGGTCCCGTTTGTTCCTACAAGTCTATTTAGGCTTGAACAAGCTGTCCGTGCCAAGTTTCGGAGGTTTCAGTGGTCATTTCGCAATTTCGGCCCCCCAACGAGCATTTTAAGTCTGGTGTTTTACAATTTTCCTTTTAATTTTCTAACCGAAGATCCAATCGAGGTCCTGTTTGTTCCTACAAGTCTATACAGGCTTGAACAAGCTGTCCGTGCCAAGTTTCGATGGTCATTTCGCAATTTTGGCCCCCGAACGGGCATTTTAAGTCTTCTGTTTTACAATTTTCCTTCTAATTTTCTAACCGGGGATCCAATCGAGGTCCCGTTTGTTCCTCCAAGTTGATTTACGCTTGAAAAAGCTGTCCATGCCAAGTCTCGGTAGTTTCGGTGGTCATTTCGCAATTTCGACCCCAAACGGGCCGGGCCTTTTTAGTATTGTGTTTTACAATTTTCCTTCTAATTTTCTAACCGGAGATCCAATAGAGGTCCCGTTTGTTCCTACAAGTCTATTTAGGCTTTAAAAGGCTATCCGTGTCAAGTTTCAGTGGTCATTTTGAAATTTCGACCCCTGAACGGGCCTTTTAAGCCTTGTGTTTTACATTTTTCCATATAATTTTTTAACCGGAAATGCAATCAAGGTCCCGTTTGTTCCTACAAGTCTGTTTAGGATTGAAAAAGCTGTCCATGCCAAGTTTCGGTGGTTTCGGTGGTCATTTCGCAATTTCGGCCCCCGAACGGGCCTTTTTAGTCTTGTGTTTTACAACTTTCCTTCTAATTTTCTAATCGGAGATCCAATAGAGGTCTATTTGTTCCTACAAGTTTGTTTAGGCTTCAAAAGGTTGTCCGTGCCAAGTTTCGGTGGTCATTTCGAAATTTCGGCCCCTGAATAGGCCTTTTAAGTCTTGTGTTTTACATTTTTTCTTGTAATTTTCTAACCGGAAATCCAATCGAGGTCCCGTTTGTTCCTACAAGTCTATTTAGTTTTGAACAAGCTGTTCGTGCCAAGTTTCGGTGGTCATTTCGTAATTTTGGCCCCCGAACGAGACTTTAAAGTCTTCTGTTTTACAATTTTCCTTCTAATTTTCTAACCGGAGATCCATTAGAAGTCCTGTTTGTTCCTACAAGTCTATTTAGGCTTTAAAAGGCTATCCGTGCCAAGTTTCAGTGGTTTCGGTGGTCATTTCGAAATTTCGACCCCTGAACGGGCCTTTTAAGCCTTGTGTTTTACATTTTTCCTCATAATTTTTTAACCGGAAATGCAATAAAAGTCCCGTTTGTTCCTTCAAGTCTGTTTAGGCTTGAAAAAGCTGTTCGTGCCAAGTTTCAGTGGTCATTTCGCAATTTCAGCCCCTGAACGGGCCTTTTTAGTCTTGTGTTTTACAACTTTCCTTCTAATTTTCTAACCGGAGATCCAATAGAGGTCCGTTTGTTCTTACAAGTCTATTTAGGCTTCAAAAGGCTGTCCGTGCCAAGTTTCTGTGATTTCGGTGGTCATTTCAAAATTTTGGCCCCTGAACGGGCATTTTAAGTCTTGTGTTTTACAATTTTCCTCCTAATTTTCTAACCGGAGATCCAATAGAGGTCCGGTTTGTTCCTACAAGTCTATTTACTAACATTGCAGCACAGCCTTACTATGATTAAAACAAGTGATTAAAATATGAGATTTCTCATATATAGTTCTAAGAGCATACCAACATCAACATAGATCCTCTTTGCTGCAGCCTTGATCTGTTATGTAGATGGAAAAAAG
>MSTRG.80847.1 Scaffold3291 96835-97856
TGGGCTTCAACCCTATCCCCCTTGATGTATTCCAGACTCTATCTCTTGCTAAGGCCTTAGTTAATGGATCTGCAAGATTATCACCAGATTTAATATAATCCACATTTATGATGCCATTATTCATATAAGATCTCACAGTACTGTGTTTTCTTCTGATAGATCTGGATTTACCGTTATAATAACGGTTATTAACTCGACCAATTGTTGCGGTGCTATCACAATGAATCAATATAGGTGGAATCGATTTTTCCCA
>MSTRG.117757.1 Scaffold5364 1087784-1089546
AAGTGTTAGAAAAGTGCATTTCTTTACATAGTTTTCAAACCGGGAGTGCCGTGCTAGTTCCGTAAGTTTCCGTAACTTATATTGGTCCCTCCTGAGGTGTTTGAGGTGTTTCCCGGGCCTTCTCGTGACTGTTACACAATTTTAGCCCCAGATGGCCTATTTTCAAGCTTAAGTGTGGAACAAGTGCATTTTTTGACTTAGTTTTCAAACCAGGAGTCCCGGGCTAGTTCCGTTAGTTTTCACAACTTACATTATTTCCCCCCCGAGGTGTTTGAGGTGTTCCCTGGGCCTTCTCGTGATTGTTACAAGATTTTGGCCCCTGATGGACAATTTTCAAACTTAAGTATAAAAAAAGTACATTTATTGACATAGTTTTCAAACTGGGAGTCCCCTGTAAGTTTCG
>MSTRG.110115.2 Scaffold474 229641-232318
CCTCTCCTGAAGCACACCATAACATGCTTCTACCCTTCATAATAGTGAAGAATTTTGGGTTCAGACTCTGCTTTTTACCAAGTCTCTTTAGAGAACTTAGAATCTGGTTCTTCCTTGCAAGGTTTTTACTTTTTCTTCCTACCTTTCTCACCTTTTTTCTGATTTTTTAATTTTTGTTTTTTTGCTTGGGTTGATCATATCATATCATGGTATGAAATATCATGGTCTGAAATGGAGAGAGAGAGAGAGAGAGAGAGAGAGAGAGAGAAGGGTTGGCTACTTTGTCACTCAAGATTGGCCAACAACAACAAACTTTACTTGAATGGGAAGACTATTTTAGACAGCAATTCCCCACTTATTTGTATACGGTTAGGTTAGGTTGCTCTCTATTTCTCTTTTTCTATCTGTGTTTTTTT
>MSTRG.50688.1 Scaffold2223 395867-397229
CTCTTTCTGGGTTCTTGCCCTCTAAAATAGTTGTAAATGAAGGGGACGAGCCCCCATGACATTCACGCTCACTGGGTATCATCATTTCATGTGATTCCATCATACCAGCATGTTTGCTTTCCGTGAATACTCACCATCTTTGCTTTGAAAAAGTGTGTTATCCACAGCATCAATTGTAGCCAATTCATCACCAACTCCATCCATACTATCTGAGCAAACTTTATTCAATCATATTTTTGATTGCTGCAAAAATAATTTGCCAGCCAAAAACTGCAGAACAAGAGTAATCAAAATGGAATATGGTAAATTTTAAAAAATCATACAGTTCAAGAGGACGTTATAGCTATGCCATATTACAAATTTTCCAAGGGTAGAGCACCCAATCCAGTTCAAAGTTTTAAAAAACACAACACCAACATACAAAGCAATTCACAGTAATGACAAGAAATCAAGAAAGAATGTCAACACATATATGGTGTGTTTACATTCATATAGACAGAGGGAGGGAATTCAAAAATTAAAACACATAAATCAAAATTGCCATATTAAAATCTCACAGTAAAATTATCTATTAAACTAACACACTTCAGTGAAGAAGAAGAAGAAGAAGAAGAAGAAAGAATACAGCAAAAAATGCATCAACCTAGCTTTGGTGACAGCTTCCTAATCAGGTCAGACAATTTTCTTTCCCTTTTTCTTTTGGTTCTTTTCTAATCAATCACTGAGCATGCCAAAAATGAAAT
>MSTRG.47929.1 Scaffold2145 117685-336178
CTTATTTTGTAACGTGCTTCAGAAACTTTAATAATTTCTTTTAATGATCCATGAAAGTCCAGTTTATAACTATTCCTTGGTTAAAAGGCCAGCATGTAAAATCAGTTGTCAAATTCTTCACTGTATTATCTTTCCATTTCTGTTTTTGCAGATTGTCTTCAAATTTTTATTTAGGAAATATAACAGAGACTGTGTTGTGAGGTACCTTGAATTTTTACTATACACTTAAATTTACTGTACGGGGTTTTTTGAAGGAGGTGGGATTCCAAGTGCAACAGGCTTGGCCTGAAGTTTTTGCAATATTTATTGTTATTGTATTTTTCAGCTAGGGTTTAGTGTGAGATTGTGACAGCACTGTAGAGTGATAGAAGTGAGATTCAAATTTCTGTAATCTTTATTATGCATAGTGGATTTGATCTCCTCCCCTTTGTAGACTTAGACACATTGCCAAACCACATATATCTTGTATTTAGTGTAATTATTTGTTTATGTTAATTGTTTTTTAATTGGAACCG
>MSTRG.100028.6 Scaffold4138 2917821-2919515
CCCGAAACCCTCCTTACCACCTAACCAGATCATCTACTTTTTGACTATTTTCCTCATTTTTCTTTGTTGTCATTGCCCGAGTAAAAAAAACACAAAAAAAAAGACATTATACATGAATTACAAGAGAACCCAAATTCGGATTGTTCTCAATTCTGATCCCCCACCTCACCCATATAATCAACCAATCAATCTTTCCTGAATCTTGAGTTTTTGTTTTGTTTTGTTTTGATTTCTTTCAAACATTCCCTAAATACCAACATTCCAATATCTGTTTCAACATAAAATTGATTTCATCAATCTAAGGTCTGTATCCTGCCCTCTTATTTCAATTTTCATGGAAAATTGTAATGTTGTTTTCATATGCTCTCTCTTTCTTTGAATCATTTATCATTGTGGGAGTCAATTAGTTTGAATTTTCTTCAATACCCATTATGCTTAAATGCAGAATTGAAGACACAAACATGATTACATTATAAGTACCAGCTTTTCTTGTACTGGGTTTGAAATTCTTGACCTAAACATGTCTATCCAGCAACAAAATACCCACAATATTTCTGAATTGAAGATACAAACATGGTTACAATTATGGTTGTAGTAGCAGCCTTTCTTGAACTGGGTTTGAAATTCAGGACATAAACATGTCTCTCCAGCAACAAAATACGGATTCCAACAAAGTTTGTGGTAATCTTTGGTTCTCTGTTGATGAAAATTTATGCTTGTTTGTTTTGTTCTTTAAATATTACAAATATTATTTTGTCTTTCTTACTGGTAACGTAACTCATGGGTAATTTTGCATATATGTGATATTAGGATTGTTACAAGAGTAAACAAGGACTGGAACTGATTGGACATTTGTTTTATAATTTATTTTGTGAATTGTGAATTAAATATATATATATATATATACATATATCTAGGTTTGGAATGGTAGAAATCAAACAAAAGTAGCTTGGATTGGAATTTTTATTTTGAATTTTGAATTTTGAAAATACTCCAGCTCCCATTAATCAATTTAGACAGCATTGAGAGTCAGGAACCATTTAAACTCACTTTTGTAGTTTGGAGACTCAATTGAGAAAATTAACAGATTGAGGTGAGGACTAAGTTCAACAAAGCACATGGTTTATGGACCATTGGTGTAATTACTCCTATTTGTTAATGCTTCCATGAGTCCAACTACAAACTACGAACATTTTTTATTCATTAGCATCTTTTCCCCCATTTAGAAGGCCGAATTTCATCATTTCTCTTAACCTATTTCGCTACAATTTTGTTGATCAATCTGATCTGCCAAGGGATTTGTTTACTGATTTCTAGCTGATTATTTGAAATATATCAATGTAGACAGTGGTAACCCTTTCCACTCATGTTTACTCTATTAATAAATTCCACCAAGGATTGGTACCTTTAGGTATTTCTGATGCAGAGTATTCTTCTTTGTTAGTTCATTTGTGTTGAATTGCCACCGCTTTAGGGGTTTTTCAGGTATTCTCATTATCATTCTAGTAATTCCTATGCCATTGACTCATTGAGATATATTTATTTGGGTCGATCATGCAAGCAATTACAAGTCTTACATTATG
>MSTRG.54687.1 Scaffold2329 267728-274176
CGAAATTTTTTTATAGGGAAATCACGCGCCCACCCCTGTTCTCTGTTCATAGCTTTCACACAACATTTTTTTCAAATTCTCCTCCACCGCCAAACCTCACCCCATCGCTACAGATCGCCACATCTACATCGTCGATGATCCTCCTCCTTCTCCTCCGCCTGTGCCTCTGCTGAATCCGAGAAGATCGTCGAGATCTGAATCAGATTTGAGTCCTAGATCTGACCGTCGTGAGCGATCCACAGCAACACAATGGCTTCCAAATCCTACAACAAGATCATCGATATCTACGATACGACAACCTCATCCTTCAGATTGGTTCTCTCTTCAACCGTGCTTCTGGATTGATGCAATAACGTGAACAGTTTCAGCCATGACAGGCCGAGAAATCCTCCTCAAGATGAAGGTAC
>MSTRG.41015.1 Scaffold1941 321868-350901
ATTAATTTATACATGTTTTAAAAAATCCAACATGTTTAAAATATGAAAGAAATAAATGTTATATACTTAAAGTCAATTTTGTTGTTTAACTAGCTAATCCGGAGGTTGACTCAACCCGGCCATTTCTATCCCACAACCCCCCATGGGATTGAGATATTCCACATATGAGGGACTATTACGCTGACTTCTACTTTTCTAACCAAAAGTTGGACTAATTATTCTATTGGACATGGAGTCCAATCCCATTGCTCTATCCCACCAAACAAACACCCTGCACACAAAAATCCTTCATGCCATTTTACATCCCTAGAAAGAATTCAAGAATTTTGACCTCACTTAGTATATAGAAAGAGGGATCAACCATGAGTTTTCCACACCACATACCACACAAAATGGGGTTGTAGAGGGGAACAATAAGTTATCTAGGAGAGACGACCTATGTCATGCTGAATGCCAAGAATATACCTAGGAATTTGAGGGTTGAAGCAATTAACATTGCTTGTTATACCTCATATAGAAGGTGTACCTTACATGGAACCTCTAATAGGCCAACATAGACTGTAGCATGGCAAGAAGTATTTTTAAATCTTTAGGACTAAGTGCTACATTCTTAGGGATATAAGAGCCTCATGAAATTAATTCCAAGAGTAATCTTGGGTCATTCAACTAACAATATGGACTATGGACTACTGGTTTGTTATCTATTTGAAGATACTAAAACTGCTAGGCTTGGGGAGTTTAAGGTGAATCTAAAAGGTTCGCAATTTCAATTATCATGCTTTATTTCGTAATTGAAAAATCACGCTCACTTGAACCAACAACTTTATCTTGCATATATTTTGGCCACTAGTGTTCGAAGCCACTTTTTGGAGATCAAAGTTTTCCATGAGGTGTGATCCAAAGTCAAGAAACATCAGGAGCCACCTGCCATACAAAGATCGAACGAAATACCCGGTAAAAGATTAAGTGCCAAGTGCATACTGGGTTGGGTTAGGTAATAAAGCATCAATTTTTCTATTAGCATTATAAATCATCGATTTAATTCTTGTAATATCTATTGCGATAGAGAATTGTTCAACTGGTACGGTTTGTGTGGTTTTACCTATGAGATAGTATTATTCAATGGTTTCCACATAAAACTGTGTTCATTGTGTGATTGAGATTTGTGCAGTTTACTCTTTAGATGCAATTTAAATTTTAATTGGTTGTGTTTGTTTAAGTTTGGTCCATTCACCCTCCTCTAGGAACAAACATAGTTCTCCTCTGATCTTTCAAAATTAATTTTTCAAGTTCTATGGATGGATTCAGGAATTAACAGCACAAAGCAACCCAAAGGGAATCGTCAAACAACTGCAAACTCAATTTCCTCAAGTACTAAAAGTTGCCCATGAACACAA
>MSTRG.115400.2 Scaffold5124 132949-133635
ATGCATGAACATTCATGAAAAGAATGTGAATTACAGAGCCATAATTAACAACTTTTACTTACTTTTTGGGACCAGCTTTGAATGGAAAAACGAATTAAAGAAACGATTTTTAGGTGGGTAGGATTAGAAGGAAAAGTGGGTGGGGCCAGAAATCAACCGGGTGGACCGGTGAGAGTCGGTGAATGAATGGTAGAGGGTGACCGGAAGGTGGATCGCATCAGAGCGATTCAGAAGAGAAGGTGTAGCTAAAAAACCGTCTCTGTAGACATTACGTACATGTTATATGTATGCCCTAATAATAAAGGTGGAAGAGAGAGATGAACAGAGAGAGAGAGAGAGAGAGAGAGAGAGAGAGATAGAGAGAGAGATGTTTGAGTTTGTTGGTTGTTTGTGAGTTGGGATCTTTTGGTGTGGCGTTGCTGGGGACTTCTGGAGTTTTGTG
>MSTRG.14096.2 Scaffold1290 2832336-2838553
ACATGACAATACAATTCAAGGTCAAGTGAGCATTCTACATGATTAAGTCTTTACGTCCTAATTTAGTCGACATTTCATAATGATACCCTATGGTACACAGACTCGGGTGCAGGTATAGGGTGTGGGTGTGTATCTAAGAGTTGGACACTAAAAAAAATTGAGGATACATGGATATGAATCCAAATTTGGATAGGAATACAGGGATACATTAAATAGTTATTTTTAAATATATTTGTTATAGGAAGGTGAGTTAAAAAAAGTTGACCCATATAACAGCCCATGTAATTAATAGAGATGTGGGAAAACACCAAAAGGCCTAAGTTTTTATTGTTGAACAAAGTTTATAAGTAGGCCCAAACTATTATTTTATTTATTGGGTCTGGCCAACTAGCCAAACCTAGCAAAAATGCTCACCAGTTGAATAACATGTAATCCCTCCAACTGCATTGCAGTCTCATAAAGACTGAAACCAGCCGATCAAACTCTCTCTCTCACACACGCGCGTAGCACGATCGACACTCAATAACCCAAAATCTCATGCTCCCTCTTGGTTCAAACCCTAGATTATGACTCTCTCTCTCTCTCTCTCTCTCTCTCTCTCTCTCTCTCTCTCTCTCTCTCTCTCGATTCGAACTCTATATTATGTCATTAATGTAGCCGACATTCAATCGTCGATAAAGCTATGATTCAAAAAATCTAGATCTCGAACCCAATACATATCGAAGTATCTCGACCTTCTTCTTTCTTTTCGATTAGCCATGTCCGAGAGAGAGGAGGCAAATCCGACACAGATCCCACACCCGCATCCATGTCATGTCATGTTGACACAGATACTTCCCCAAACAGTCGAGTCCATGTAACGGAAAGATGATACCAACAACTGATATCAAAATGCAGATGGTTCAACACCCCCTTATGTCAACTCACTTAGTCATCTTGTTTTACTTGGTTGTCTTCAAAGAAGCCGATAGATCAACTGGGAAAGCTACCATAGTTCATTCCTAATACAGTTGTTATTTGTTAGTGTTATCATTACAGATATGAAGTTCTTTACCACATTCAACAGCCCAAATCTGCTTCAAATATTAAAACAATGTGATTTTCAGGTTGAAACACAATACAGCACTTTTAAGTGATAACTGTGGATGTGCTCCAGTTGCTTTGTCTTACAAAAATTCAAATCTCATTGGTCAACCAAGTAAAAGCATTTGACCTAATAGCTTTCTTCTTCTCGACTGTCTAAATCACATCTACCAGTCCGGAAAGAGGGTAATATCTCAACAAAACCCCTATGTATGCACCAATCCAATTAGGGCAACAAAATCAAACCCCTTTCATGCCAACAAAGATCAATCCAAACTAGGTAGAGATGTAATATTATCAAGAAGCCCTCACTAATTAGCATAGTATATATGATTCTCTACCCGTTACTTAGCAAGTAGCAACTGGGTTTCATGGGTTTGGACTGATTAAAGAGAAACCCAAAAAATAACCAATCAAAATTCTTGCAATCCAATTATTTTACTTGATGAAAAAAAAAA
>MSTRG.71320.1 Scaffold2907 79760-107214
ATCTTGAAAAAAACTTGCTAATGGCCCAGCCCAATAGTATAATGCAGAGCTTACAACTAGCCCGGCCCACGATTTAGTTTCCAGTTGGTTTTTAATGGGGTGGTCCAGGCCCATTTTAATTTTCTTCGTTCAACTCTATTGTACAAACAAAATTCCAAAAATCTAACTTGAGGATAAGATCTAAGTTCTCGAGTTCGAGTCACTGCAAGGGCACTCGGGGTTTGCTCGGTCGTTAACTTCAGGACGCTGTGATTAGTCGAGGTGCGTGTAAGTTATCACAAAATTAGGTTCTTCAAGTGATTCTAAATGCAGTTCATTGGAAAATCTAGGACCCAATACCAAATTATGGCCTTTCTATGCGGACAAATCCAAAACTTACCACAATCCAATT
>MSTRG.39774.7 Scaffold1911 375281-378217
TATTTTCCACGATGTTGTTTGCTTCATTTCCAACTCTTTCCTCACAGATTTTGGGCTGGGCACGTGGGTTCCTAGAATTTCCCAAACCAGTGCTCTGCTGTTTGGCTATTTCCCAAAGCTCCTACCTGCAAGGTGTGTATTCAAATCATCCACACCGACTATGAGGAAGAAAACAAATTTTGCCCCTTTGAAGAGCAGTCTTCACCGACCCACAGGTCCACGAAAAAGCCCCCAACTTGAATTTGTGGAAGTGCGCAATTGCCACTGTTGCTGTCGCCTATTACATCTTAATCCTATGGTAGTGTATCGGTTGCTGTTGAGTTGAGAAAATGTTGAGGTGTCTTCATAGGGTGTAGCAGCGAAGCGGCAGAACTCTACATTTTTCGGAAGTGCTGAAACCAAGAACAACAAGTGCACAACCAGACAACCAGGAGAGAGAAGCCCTTGAAGCTAAATACCAGAAGGTTTATGGATCACTATACGATAAGAAGTTGAAGGAGTTACAAGTGAAGCCACATGGACCTTGAGGATGATAACTCTACAAAAGGTAACTCACTTCTTTGAAAATTGCTGAATTCTTCTTCTCTCTTTTGTTGGGAAACGTTTTTTCACACCATTGGATCTCATCTTCACAAGTGACAAAAACTTCCATTTCTACTCTCTATGTCCTGAAATCTGTTTCTCTACAAGTCAAATGGTTTTGAAATTATTTGATTTCGGTTATGAAACTGTTTGATTTCTATACAATCTCTTCTCTTCTCTTCAATGATTGAAGTGGGTTTTCAAATGGTCTCTACCCCAGCTACGGGGAAAAAATGCATATTCCAAAAAATAGAGAACGAGGTGCCAGGTTAGCATATCTTGTCATACTTATTGGTTCTATTTGATTGACAACAGTTACTTTTCTTAGGGAAATAGACAATTAGTTTGTTTTACTTGTGGCTTTTGATTCCTTTGTACATTTCTTTGTAGGTTTAAGTTTTGTGTATGAAATTTAATTTTGTTTGTATTGTATTTTGTGTGTACATGGATTCAGCCTTTTTTTGGCAGTTTTGTAAAAAATCTTGAAGTTTGTAGTTCTCTAGGGGAGTTTGAAAGTAGGGATGGCAAGCTTATTATCCTGTGATCTGCTTGATGGTTTACTAAATTGGTTTTGACTTTTTGGTATGGACCTTAGGACATTGGCATACCAGGTCTTCACCTTAGTGAACTGTTGTCGTTGGCATTCACTTTTTGAGAAGGATTATTTATAAAGGTTCCAAGTTATGGGATATTTATGACCTGGAAAATTAGCAGATGAATTGGTTAGTTCCTACAGTTTAAGAATATAGTGGTTTGTTTGGGTCTAGGCTTGACCTTTAACTTTAAGTCATATGGAACTGGGGGTATCTTCTTAATAGAGCCACCACACTATCATTCCATACTTCGACTGATTTAGAAAATTATGGGCTTATGAATACATATTAATTACCAACAAAATAAATCTTCACATGATGATGTTTTAAAATATTAAAAATGGGA
>MSTRG.41741.1 Scaffold1968 800995-837815
AATATTTTGAGATAATAAAAAATGAAATAAGAGACTAATATATTGGGAGGAGAGAGTAGTATTATTGAAATCCTTTAATAACAATTCTACCGAATTTTTTATTGCTGCCTTATCATTATATATATATATATATATATATATTTGACTACATGCGAGCCTAAAATGGATAAGCACGTAGAAATTAAACAAAATAAATAAATATATTGAGAGAACTTGAGTGCTCTGTGGAGGTTACAACGTATCTCGTTTTGATCTAAAAAAATAGATTGATTTGATAATCATAACAATTTTATTTTATTATATCGATGTTTTGGGAGACAAACACAATAAAATAAAATTGTTACGATTATCGGAACAATCTATTTTTTTCAAGAACTTTACAAAAGAAAAGATTTGAATTATCGAAACGCAACTCATGGTGAGCCCCATGATCCCCTCAAATTCTCATGGTTGTCTGAATAACTTCAGTAATATTATTGCTGATCAAAAATAAAATGAAAAATGCTATTTACATGGAATATTTATTTGAAATATTATTCCGAAAGTAAAGTATACATTCGAAATTTGTATGATGTAGACCAAACTATCATAAGAGTCAGGTGTATGGAATTAATGTTCTAGAGGAGTCTTTATCTAGTTTTGCATCAAAACTACACTGCAATTTCAAGGCATTTCCTCTAAAGTACATGGGTATGCCTTTGGTGGCTAATCCAAATAACAAGTCAACTTGGAAACCAGTTCTTCATAAAGTCATAAACAGACTAGCATGATGGAAAAGGA
>MSTRG.11863.1 Scaffold1236 667114-668185
CTTAAAGTTTCAATGTGGGACAAGCCTTACAATACAAGGAAACCCACATTTTATTCTTTAATTGTCCAATTCCACGAACCCGAAAACGACGTCAACTTCCCATTCACTCATAAATGATTATGACAAACCGTCTTTACCATGTGACTTGTCATGCGACAAATAACACGTTACCTCTTTAGACCCAACCAAAAGAAGTGTAGGACCCATTCAAATTTGGGCTCAAAGTTGGCCCAAAATAAACCTGTAAAACCATAATTCCAACAAATACATGGTTGGGATGCCTTCTTTGTTCTAGGGAAGGCCCACTAGTCCCGAGAATAACCTCGTAGCTAGAAAGAGCCTTGTGGGTCATGCCGCCTTCCTTACATTAGGATTGGGATGCCCTTCTCGTACTCTTATGGCTAGAAAGGGTTACCTTATTACTTTATATATAATATGCTTGGTTCCAATGATTAGATCTCCTTGGCCGTCTGTAAGGTGCAGGTCCAATCTATCTAGCTAGGGCGGAAGGGTCGGGTCAAACCCGCTTGACTCAAAAAGCAAATCCCAATCCATAACCCAATACTAAGATGGAAAAGAGGAAATAAGAGCCGCTCTCTTCAACTTGTTTCGTCGTTGCCCGTCTTGCATCGTTTCCACCGTTCAGGCTTGCTAATCCACTTCTCTACCCTCTGGACTTTATAAGCTTATCGACACCCTCCTAGGTACCGGTTAGTTATTAGCCGGCCTAAAAGGGAGACTTGGAACTTATAGGCAACTATGCTTAGGTTGAGCCCGGTTCATGCAGGCGGCAAGAACGCAATGGCAATGGGGTAAATAGGGATTTGGTGCACAAGCATTGTCTGCCGCTTTGGGAAGAATTATGAGAACGTAGCCAATTCCTTATGATGATTCTAGCTTAGTAATTAGAGGTAACCCTCTGTCTTAGGTTTTCTAGTCCGAATCCAGCCTCCGGCCCTGTGCACATGTTTTTTCTCCAATGCCTACCTAGTTGAGTTAATTTCCCACCAGCTTCTATTATACCATGAGGAACCATCTCATTTATCACTCAG
>MSTRG.130881.1 Scaffold663 1275209-1304238
CTACGCATTTAGTAATGCACAAGAAGTTTGCTCCAGAAGCCTCCGGACCAACTGAAATATGGGTGAGAAGCCATCTAAGGAGAAGCTTATTAAAAAGAAAATAGGCCATCCAAGAATCAAACACTATGGTCATTTTCCCTTTTTAGACGCTTTCTCTTCTCTTCTTACCCAGGGAGGGAGTTCAGAACAGGACAGAAACTCCAAAGATATTATTGGATTCTAAGGATATCATTTCATCAAAGGTTGGACACACAGAAACTATCTTTAAAAAATAAGAGCTAATATTCACAAATTAGTAATAAGGAATTTCAATATCCTTCTCTAAAGAGTTGGTAGTTTTGCTTTTAGGTATCTGCATGATGCAAACTAACATATGCTCCAACTTCCAGAAAA
>MSTRG.81087.1 Scaffold3313 561071-561556
GATTGATTTAGCAATGTTTGGTGGTGAACTATTGTGCCAAATGGAGATTATGTTCTTGCTCAAGTGCTAATTGGAAATGAGAAGAGGCTTGTTCACAAGCATTTGCATATTGTCAATGGTGATGCTATAGTTGCATTAAATACATCGTTTCAATTGTGATTGACTTGATTTTATTTATTTTGTACTTGGTTTAACTTTAGGTATTGTTAACTTAAATTTTGGATTGTAAGAACACATGGGCTA
>MSTRG.114217.1 Scaffold502 1767577-1772160
CTTGTTTCTTTCTTCTTATCAGAGTATGTTAACCTTATCATATTCTGTAGTTAGAAACAAAATCACAAAAATGAACAGTACTTCTTTACAAAACTAATTGTAAATGATGCTCTGTCTCATCATGGTTAATCATCAGTTCTTTTATATTTCACAAATTCACTGGTTACGTGATCAGTGCCTAAGTGTTGAAAGAGCATCTAGCGGTATTTGAACTTGGAACGTCCAACTTGAGATTAAATGACTGATATATACCCAACCAGCCACCTAATAATTTTATATTTTATTATTTATTCATTTAAGTAGGGTTGAACAGAAAATGTGATCTGCAATGAAAAAACAAAATAGTGTGCAAATGAAAAGAAAAGCCAACTCATGTATTCAAATCCAAGTTATTGTTATTTAAAATATATTGTGTGATTGTTTCTGAAATTCAATTTTAAAAATACTGTACTAAATATTGTGCTTATCCTTTGATAATTTTGTGCACTTCCAGCTATTATGCTTAAATTGAAAACTTCTGGTTCATTTGAATGGAAGCATGAATGTTAAACTGAATATGATTTCCGTCTTTGTTAATTTGTAATGCTGTATTTATTTGCAGACAAGGCAGGTGGTAAGAAACAGATCCAGTCAATTGCACAAAATCCTGTCAACCATTACAATTGCAAATTTTATGCTAAATGCTGATTTCACAACCAAAAGTACAATGGAAAGAAAGGATCTATGCAATGCAACCCACATAGCTGGGAGATTTGATAGGCATGCTCAGTTTGCTGCTCATCTAATCCATCATGGTGGTAAATCCTTTATTCTGATCTAATCTTGGATTTTTCTTCTTCTTTTGTAATCAACAAAAAGAAGGCAGATTATCCCCACCAAACTTCATGCAGTGCTATCCAGAAAGCAAGTTACATAAGAAGAAGGCCTTGGTTGAGGGAAGTATTGTTGATCCGCTAAGATCTTAGAAACATGCATAATTATGCAGTGATTGCTGTTGTTGTTGGATTGCTTCAATGGATTCAATTGCAAACTCAACGACATTGTGATGAAGAGGAATTTGCAAACCCATCAGCCTCAGCTGCACG
>MSTRG.12613.1 Scaffold12568 589961-592770
CTCATGCTCAACTAGCAAGAAAGTTGTGGTACCTACATCTCCAACTTTCCCATTAGGATATATTTTCTCTCAAAACTGATCCTGCAAAAGATTTTGCGGGAAACTTAACAATAACTTCTCTTTTCCTAACAAGTGAACACACAAGCAGAATTTTTTTTTATTTTTCCTTCACTTCACTCTAAGAAGCACGGACACTTCTAAAAAGTAGCGTACACTGACACTCGTCAGACACTCATCCAAATGTGTTTTATTTTTTAAAAATAAATTTAGGCTTGGACACTCGGAGGACATAAATATCAATTGCTTATACACACATGTCCATTGATTAGGTATACACAAAAACTATTTATAAGTTTGAACAAAGGAAAAGACTATGTACATACCCCTCAAAAAGGTGTGTGCCTTATATAA
>MSTRG.109268.2 Scaffold4669 732829-735388
CCATTATATATTTATAGATACACTTGTATCCTAAAATCTTTTTTTAAAACATCTTATTTTACAAATTCCAACAATTGTACAAATATATATATATATATATATATAACAAGTCCATCAATTCACTATCACATGGCTAGCCATCACCATTGTAGGTGTAATGAATGTACTATGAGACAATTTTCCATGATTTATGGAAGAAAAATCTTTGACTTGATACAAACTTTTATATACATGTATATAAACAACTAGGTTGGTTTGATTAGGAGGAAAACCCTAACTAGATCATATTTACGAACCTAATTAAGACCTTTAATCCTCCACTATTCCATTGAATTCAAACTAAATCCAAATTATCCAATCCAATTCCAACCAAGGGGCATTTAGGACCTTTTGCACCAAATTCATTACATAAACGACCCCTCCCCTAGCATTTTACATACAAGAATAACACTTGTACAAACTATACTCAGTTGAGAGAGAAGAAAGGAAGGAGGGTGAACTTGGTAGAAGAGAAGAGAGGAAGAAAAAATTTGCTAGCAATTCCAACAACCTTCAAGTATCGAAGAAACGTACGAAGCCAACGAAGAGTCAAAGACATTTGAAGACTTAAGTTTTCCTTAGAGAAAGTTTGGAACCATTTCGCTCATTAGTCTAATTGTGCTTTTATTTATTCTTTTTGGATTGTAATAGTAATGGAACTCGTTTTGTAAATTTAAAATTTGAGACACTATAATTATTATTTAATTTGTAATCCTATGCCTATCTTTGCGTTGCTTATGAGACCTTGCGTCAATGCCTTTGAAGATCTGTCAAAAGGGTGGTGCACTGCCTAAGAAAGCTGGACTTAGAAGAGAGGCTAACTTGACTCCTCTGGCGATCTGGGATCTTACTCGGTTATTGGCCATAGGACTCATTAGTGTCGTTTCCTAGACTCCTAACATTAGATAAACCCTGTATTTAATTGATAATATATTCTCTGAAGTTCGCGATTTTTGGGGGCGTCACAGGCCAGGTACTTAGGGGCA
>MSTRG.150724.6 Scaffold920 387919-389930
TGAAAAGATGAATATTATCAGAATTTGATATGGAAAAACAAAACCATGGTGTATTAATTTGTTAATCTACTCTCAGAAAGACACAGCAGCGTGGGGATCAAAGGGCTGAACCTGTCAAACTTTGAGCAGTCAATGGCACCAACAACAAGTGTAATTCAAGATTTCCGGTATATATATGAACTATCGTTTTTATTCCGTTTTTATTATGTCCATGTTATCTTAGGTTAACAACAATGTGATTTGGGATTGCAGGATTCAAAACAAAGATAAAAGATACTTGCAAAC
>MSTRG.79627.1 Scaffold3231 1403903-1508561
ATAAGAATCAATCAAAAAAGAGGTCAATCTTACTTCCTATTTGCACTTTTCTGGTGGTGCATCATTTAAGTTAATATTCCAACAAAAGGTGAATCACAGCAAATTTTTCTGGTGAACCAATGATAAAACCCATCGAAAAGTCTATGAGCAGTTAGGATTCAGAGGTTCCAAACCAATCAACATGCTGTGAAGCATGTTAGCATATTCAAGAAAATCAATTTAAT
>MSTRG.73019.1 Scaffold297 810838-811143
TGGGATTGTGGACAAAAGTTTGACAGGGATCAATGAATGGACCGAAGGTCGTTTTAATGTATATGAATGGACCAAAGGTCGTTTAGATGAATATGAATGGACCGAAGGTCGTTTTGATAAGAATGAATGGACCGAAGGTCGTTTTGATGTATATGAATGGACCAAAGGTCGTTTAGATGAATATGAATGGACCGAAGGTCGTTTTGTCATGAATGAGTGGGCC
>MSTRG.121526.4 Scaffold572 473618-489492
AAACTTACGGTACTGGCACAGGACTCCCGGTTTGAAAACTAGGTCAAAAAATGCACTTTTTTCACACTTAAGGTTAAAAATAAGCCATCGGGGGCCAAAATCGTGTAGCATTCAGTAGAACACGCGGGGAACACCTTGGGAGGGATCAATGTATGTTATTAAAACTTACAGAACTAGCACGGGACTGCCGGTTTGAAAACTAAGCCGAAAAAGGCACGTTTCTCACACTTAAGCTTGAAAATTGGCCATCAGAGGGCCAAAATTGTGTAATAGTCACGAGAAGGCCCATGGAACACATCAAACAACTTGGTAGGGACCAATGTAAGTTGTGGAAACTTACGGAACTAGCCTGGGACTTCCGGTTTGAAAACTAATTTGAAAAAGACATTTTTCTCACACTTAAGCTACAAAATAGGCCATCGGGGACCAAAATCGTGTAACAGTCACGAGTAGGCCCGTGGAACACCTCAAACACCTCGGGAGGGACCGATGTAAGTTGAGAAAACTTACGGAACTAGTACGAGACTCCTGGTTTTAAAACTGTATCAAAAAATTCACTTTTTTCACATTTAAGCTTGTAAATAGGCCATCGGGGGCCAAAATCGTGTAACTATCACGAGAAGGCCCGGGGAACACTGCAAACACCTCGGGATGGACTAATGCAAGTTGTGAAAGCTTACGGAACTTGCACGGGACTCCTGGTTTGAAAATTAAGTTAAAAAATGCACTGTTTCCCACTTAATCATGAAAATAGGCCATTGGGCGCCAAAGTTGTGTAACAATCACGAGAAAGCCCAGAGAATACCTTGAATACCTCCAGGGGGACCAATATAAGTTGTGGAAACTTACAGAACTAGCACAGGACTACCGGTTTGAAAACTAAGTCGAAAAAGACACTTTTTTCACACTTAAGCTTGAAAATAGGCATCGGGGGCCAAAATCGTGTAACAGTCATCAGATGGCCCGGGGAACACATCAAACACCTTAGGACGGACCAATGTAAGTTGTGAAAATTTACGGAACTAGCACGACACTTCCGGTTTGAAAACTAAGTCGAAAAAGCCACTTTTTTCACACTTAAGCTTGAAAATAGGCCATCGGGGGCCAAATTTTTGTAACAGTCACGAGAAGGCTCGGGGAACACCTCACACCTCGAGAGCGACCAATGTAAGTTGTGGGAACTCACCGAACTAGCATGGGGCTCCCGGTTTGAAAACTATGTCGGAAAAGTCACTTTTTTCACACTTAAGCTTAAAAATAGGAAATCCGGAGCCAAAATCGTGTAACAGTCACGGGAAGGCCCAGGAAATGCGTCAAACACCTCGGGAAGGACCA
>MSTRG.65331.1 Scaffold2704 502214-503493
CCCCTGTAGATGCATTCAAATATCGAGTAATCAATCCATGCAGCTTGAAAGGTATAGAAGTGATAAAATATAAATTTTTAACATGTCCCGCACAATATTGTGTCCTACGTCTTTCGAAAATTGCCATGTCGACGACGTGTATGTGTCTGCGCTACTTAGGTGGTTACACTACATACATTTGTATATATAAAGATAAAAAATGAAAAGAGAAAAGCCATCCTCTTCGTCTCAACAAGCCAAATGAAGAAGATAATGCATATGGTGTTTAGTTTTATATGAGCACAAATCATAATTCACTGCATCAATCACAAACCACCGTTTTCCGGTCTAAAAAGAAGTAAGACGTTAACAACCCGGTTTCACATATCCAAGGAACTGCAAAAACTAGGCTTGTTTGGAATGTTTTTGTTTTTTGTTTCCATTTACTGGAAAACATAGATGCTTAAATGGATGCATGAGTCCGTAAACTAATAACTAGAAAGAATTACCGCAACATGCTAAATTGAACAGAAGAGTGGAAAAGTTGTATAATACACACCTTGCTACAACCAGTAAAAATGACTTCATCTCCATCTTCTAGAAATTTACGATTTGTT
>MSTRG.98581.1 Scaffold41 3977624-3978504
GGCAGTATTTTTTATTTTTTTAAAAAAAAGTTAAACAAAAAGGTGAGGAAGGCTTAATGGGTATAGGTTTAAGTACGAGGACTTAACTTTTTTATTCTTACTTATTTAAATTGCACACGCATCGTGTGTGCCACTCACTAGTGTGTGTATATATATATATATATATATATGACAAGAACACCATAGATCAGAGACAGAAAGCTAGAAGATTGAGCAGAGAAATTAAATTACCACGGCCGAGATCAGAGACTCCTCGATCGGGTTCGAATATCAACAGCTCTAATACAGCCCGAACAGAATCGAACCCGCATTGCCGAAACCACCAAGGAACCCTTCTCCACTATGAACTCCATTAGAGATGAAGACGAGCTTGGTTGAATTTTGAGTGAGGATGAACATGGGTGCTGAACAACTTGGGAATTCTCTGACTAAATTTAACTGGTGAGACTATCTATCCTCTCTTGAATCAGAATCTTCATGGTTCTTGGAGGCATTTCCCTAATTTTGCAGCTGTGAAGAAGATCAGAGAGTTGGGTCGACTCCTTTTGAGAGCGAGAGGGAGAGTGACAGGTGGGTAACGTGTATTTTTGTGAGATTTAGGTATGGTTTGGGAGGTGGGTTGCCT
>MSTRG.145195.1 Scaffold8479 835605-845824
GGTTATAGGACAGAGCATATTGTTATTGAAGAGTTATTGGCTGAAACTTTCTCAGGTTCTTTGGGTTTCAAAGAGCAAGGTTTGCTTTTGGCTGCTCTTCTGGGTCTCTCTGCATTTTTTCCTATGGCTGAAACTTCATTTACCACTCTTTAGCCTTGGAAGGTAATGGAACAATATTGTTAATGAGTTGGACACTTATTGTTGGAAGCCGAAACTGGGGATGTTGCTCCCACATTCTTCTAGGAGTTGATTCAAGATTCAAGTGTTTGTCACTTTGCAATTCAAGACTCACATCGCAAGCCTAAAACAATCCTGCTGGCAGTCACGTAGGTGGTCCTTCAAATGACGTGTTGAGGCGATGAAAGATACAATGTTTTGGTTTAGTTAGATGTTATTTTAGTTGGATGTTGTTTTGGTGATTTTAGCCTTATGTTCAAATTAAAAGCCTTGATATGAACAAAATTGATTGAATGTTAATTGATTT
>MSTRG.3339.1 Scaffold1067 100768-162215
GAATCAATATAATAAATGGAAAAAAAAAATTGTAGAAGAATTATTAAAATTTGAATATTGTAAGGCAGTGAATTTTATTTTTATTTTTTAAAATTCTTTTAATGGTTCTCATCCATGTAAGAGTTTAGGTTGATTAGGAGTTTGCTATTTCAATCCTTTCATATAATCAGTAGCTAAGAGAAAAATTCATAAACAAAGAGAATGATGTGACAATGGTCTCCTTTGGTAAAGAGCTTAAAAGCTACTTTTTGGCTTTTAACTTCTTTTGATCACATCACTTCTCTATTTTTTTACACGTTTTTTTAAAAATACTAAAAAAACCAAAATAAATAGCTTTTAACCTATTTCTCAAAACAAGCCAAGGTATATTGTTCCTTTCAAAATGTGATTTTTAGTTAAAAAGTCATTATAAATTGTCATATCATTCTCTTCATATTTTTACATATTTTTTTTTTATAGAAAGTAAAATAGTTAAATTAAGCAATTCTCAAAGGGATGGGCTTCTTTCATGTTGCA
>MSTRG.51395.1 Scaffold225 1341676-1367954
TGCTCATCCACTTCAGCAACCTCATTGCATCTGGAGTGAGAGAGAGAGAGGGGCATGAATAGTATTTGACTTTACCGAGGCGAACAGACACAAGTAAACGGAGTGAGAAGAGGGATGGATACATACAGATATAGGTACACACTGCACTACAGCCACACACTACTCTCTCTCTCTCTTTCTCTGCCAAGAAAGTAAAAGAAAGCGGCGCTCTCAGTAAGAAAGGACTCCGCTGCCTCTCTGCTCTTTGGTCTCTGTCTCTGTTGTTTTGATTGAGAATCCCT
>MSTRG.154998.1 Scaffold985 250889-251603
CTTTGATTGGTTTAGGAGCATACATTAAACATGCACATCCACCAGAAAATGAATAGATAAACCCCACTTTTCTCATAAAAATCACGACTGGTCCATATGTAGAAGGCACCTTCCTTTTTTCTTGTAGTACCTTCAAACTCGGCAATGTCAGCATCCTCTGCAGAAAAGATCTCTCCTCTAGGACCAATCATGCCTCTCCTCAAACCACGTAAGTTTATGAGGTTTTCAAGAAAACCCAGATGGGCAGTGCCTGAAATTGCAACATATCTGAGTCGGCTTTGTTGACAAAGAAAGCCAAACATTGCTCCCGAAAGTCAGTGATAGACAAAATCAACAGAGGCTAGAGCTAGCGAAGCAAGAACTCAACTAGTTTGAGGGGCAAAATCTGGGTAGCTTCTCCTTCGCTCGCTCCACCGAGATTCGCCCGGTCGATTCGCCATATCTCTCTCTCTCTCTCTCTCTCTCTCCAACTTTCCTGTGTCAATGCGTTACTGGCTCCATCTGCGTGGGACCATAGTGTTGATTTACCCGACCCGAAAGGAAATGAAACCCTGATGCGGATATTATTTCCTTTTTTATTGGGTTAGAAAAAAATTTGTAAATAAATGAATATATATTT
>MSTRG.65855.1 Scaffold273 1292032-1300226
AAAAAAAAAAAAAGTACAAGTTCTGCAAGTGGGTGGAATTTACCCATAATTTTGATGTGTTTTTGTGCAGGTAAGTAGTAGCAACATCCCTTTCATGTGAGTGAGAGAATGATATGACAATTTCAAGCCCAAAAATACTCCAAAACAGCGTGGAACATTGTGCACCTCATCTCACTCTCTTCTCTCAATCAAGTAATTTTGCAATTCTGACACACACTACACTCGTTCCTTCCACACCTTATTTGCACAAACAAACCTAGAGAGAGAGAGAAAGAGAGGATGAACATGGTAATGTCTATATTGCTTCGATTTATATATCCACTGCCGCCTCCATTGTTCATAACCGCCATGTCTGTGATCAATGCAGCGTCTTTGGCCAATGTCGGAATTTCGAAAATCATAGGCAAACACATGTATATACCTAGGGGCAAATTTGTCCAGAAAAAGAAGGAAAATATTAGTTTGGCTAAATTTCCCTCCCTTTATAGACCACTGGCAGATACTTGCCTAGGGATTCAGCATGTCAGTAATTGGATCGGATTATAAATTGAGAAATTGAGTTTTGTTAAATTATTCATGTTTTGAGTTTTTCAAAGAGAAAATGGGAACTTGATGATCATGATTGTCATTCAAAGTCTACATCTACTTGTGACATGTGCATTCATGATCATATTCATTGATAGAGCATATTTCTTAAGTTTAAGAATTTCTCTACTAGACGTTTTCGTTCATCCCCTCTGTTGTTAACTCTTTCTAGGTATGGATGGTGTACCACTGCCTCAACAATGGTCCATGTGGACGGAAGAGCATGACGGGTCCATTTTGTTTACTTTGTTGCGGCCTTGGGCCTTGTTTTGTACGACCAAGTGCCTATTCTTTTGTAAGGGGGCTTTGCCCTCTTTTGTTGTGTAAGCCGTAGAGCATTTTCATATAATATAACAGAATATTGTAATGTTTCACATGCTTTACATTCATGCCATGTAGCAATTAAATGTAGGATGCATGTGTCTCTTGAATCATCATGACTTGAAAAAAATATGTATGCCAGGGCGAGAGAGTTTTACTTCATTCTCTTTTGGTCCTATGGTCTCATGTTTGCGTCCATTGTACTCTTATTATTCTTTATCTATCTACTTTCCTCTTATTTTAGGCTATAACCATGTTCTTTATCATGGGTTTGGACCTTGTAAATCCGGGGCGTGACACGATTTGAAGATGGGGTTGGTCGACAGCTAACTATTCTCGATGCAATCAGAGTGAAACTTGAAGGAAAGGATCGTGATGAAGACTAGCCCACGACGGAGGGAGGTGGTGACGTTTGACAATGGTTTTCAATAACTTCCAAAAAAGTAGGCTTCAACCACCTACCTTAGAGCACAAATGAAGAGGAACGAAGAGAGGAATGTAATTGGGATTGAGTCTGTGGATCTGATACCAATTGATGTGGAACATCTTAAAAAAAGAGAAGAAATAAGAAAGAGAACCGGGCCACAACCCTAACACAATAGCCATACCTAAAACAATCAAATTCTCATTATTCAAAGCTAAATAATACAATGTAGTCTGCAGAGCCTAACATTTGTAAGTCAAGAAACCTAAACAAACAAGGAAACCGAATCCTAATAGAATAGGGAAACAAATATTATTGAAATCCTAACCAAACTCAAACTATAATTAAAAATAAAATACAATAATAAATTAGACAATAAATATTAAAGACAATAATAAAATATCCACAGCACACGCACGTTCTGCATCATGCCCTTCCTAAAAAACCAACAACACTACAATATATATATATATATATAATTGCAAATATATTCTTGCTCCTTGTGAGTCATCAGCCTCCGTGTTTACCAAGTCAAGAGTCCATGTCATAATTGCCTTTGAGGACTTAAACATGTCAACCATCTAGTGCACCATAGGCACAAATTCCACATATCTTGCTACCAAATTTGGCTCAACCAAGTAGTACAAAATAAACCTACCTCAATCAAGAAGTTAATGTCTTCTCTAAACCATTGAAAATAGTATGGTTTCCCATAGGAAGATTGCACGTTGCAAAGAACCTTTTCCTGATAAACTCTAAAGGCCACAGATAATACTACTATTGACATTACCTCTGAACCTATAACCCATTAAAATTACGTCCCAAAGAAACAACCATCACCTTAAAATATAACGTGCCTCATTTGTGTGTAGTAACAATCACCAAACCAAGGGCGAAAACCATGAGTGACCATGTGCCACCAAAATCAATCACTGACTCAATGATAAAAGGGATGCTGAATCATGTTGTACTTGTGTGTAAAGGATATGCTAAATAGAAGTAGACAATCTCAATTAATAAGAATTCAGAAGGAAAAGGGATAGAAAATCAAGAAACGAGAAGCCACATCCACACCCACACCCACGCCGATCTCTAAACAAAATGAGAATAGATAAAAGTCCCCGATAGACAATCTCAACATGGGCAACGGTCTCTCTTAAAAAACTCACCGGGTAGCCCCTTTCTACACTATTTAGTCAGCCTTGCAGTTACCTAGAGGGTGCTCACCACAACTTCCAAATGGATTTTTCAGACCCAAAAGTCCTCCACAAAAAATGTTTGGTTGGTTAGATTCATAGAAAAAGGACTTCTAACAGAAGTGCAACCACTACAAGTCGATTTTGCCAAAGCCGATAAGAGTAGCTTTTGGAACAACTTTGTGAGAAGTCTTTATGTCACAAATGATAATTATTAAAATCCCAATTTTACCTTCAAACTTTATTATATTTTGCCACTCCTAACCCTTGTTATTGTTATATTAACAAACTTGGATCAAATAAAAATGATTAGAATGTAACGACCCCAAAATGCGTATATGGAATTATCTTTATTTACCTATAGGTTAATGTGCTTTAATGTGATTATATCTATTTGAATTGAGGAATTATCTGTTGAGTCACGACTTTAAAACTGAAATTGCCGACCTTTACGGGTTCAGAAATCAAAATTTAGTACTTGGATATGTTAATGAGAATATTTAGAGCTATTTGGGAAAGTTAATTGGAAATTTATTTCGTCTGCTTCGTTAAGGTGTGTTTAGGTGGCTAATTTTGCACTGTAAATTGAAGGCCTTAGTGGCTTCAGAAACCAGAACGAAGTACAAAATTATGATCAGCATAATTTTTAGAATGATCAGCATAATTTTTAGAGTCATCTGAGAAGTTTAATTGGAATTGTATTCGTACGATTCGTAAGAGCGCGTTTGGCTCCCCCTAATTGTGTTAAGCTTTTATATATATATATATATGATATGAGTTGTTGAACTCATCAATTGGAGTCCAAAAATATCTAAGGGAGAGGGAGAGAACCGTGAGAGAGAGAGAGGGGAGAGACAAAGCTTCTCTAAGAGAGAGAGCTCAACATTCATGGGGGTTTGAAGATAAATTGAAGAGATTGAAGAGAGGGGAAGAAGATCAACCATGGAAGCTTGGGAAATTGAAGAGAGCTAAGAGAGAGGCAAAGATTGAACTAAGGTATGGAAGTTTATCTTGAATCCTTATGTTTAATGCATCAATTTCATGCAATCCTAATGATATTGGAAAATTTTAAACCCATTTGAGTTAGGGTCTTATGTATGTATTTAATTGAGCTCAATTTAAGAAATTAGAACTTGAATCCTATGATTTTGTTTATGATTGGAGCTCAACCTTATGAATGCCATATAAAATGAACTCTCGATTGTCCATAAAACAAGATTATGCAAGAATCAAGTGTGTTTGTGGGTTTTGTTTTGAGAACTTTAAGGAGTATGAAAGATGAAACATTGACCTTTAACTTGAGGCAAAGATTGATTTGTTTGGAATGAAATTACACTTGAATGATGTTAGTCTATCATGTTGTGGGGTAATTTTACATGTTTTTTGGTGATTAAAGTTGGAACCAAGCTTAGAAAATAGAAAAACAAAGGTTAGAGCAAACAAACATTTTCGAACAGTGGAATTTGCCCAGAGCCGCACGTGCGGCGGGGCTTCCCGCACGTGCGGCAGTCCCCTTCCAGCACCAAAAATGAATCTGAAATAAAAGCACCTTGTCCCACACGTGCGGCTCAATTCGCGCACATGCGGCCTTGTTTCCCGCAGGTGCAGGACAGCTCTATTTCAACCAACTTCAAATAAGCATATCTCTTGCATCCGGACTCCGTTTTAAGTGATTCTTGAGCCTAAATTCAAGCCCCGGAAGTCTAGTTTCCAATGGTGGTGGTCTTACTCCCAAATTCTAAGTACACAAATAGATATGCTCAAATTAGTGAAGATTATTCACTTTCTGTCTACCGATTTTATACCATTTCTTCTTCTAAACCATTTTCCTTTCGATTCCTCCTATTTTCCTAGACACGGATTATGATCTGTTGAGGACTGATGAGTTTAGAACCAACCTAACTAATTGATTAAAGAACAAGTAAGGGATTGGTTATATTCTTATATTATGCTATGTGCAATGTGTTTGTAGGTCAAGACAAGGACATCGTCCCATCGCTACTAGAAGCCCATCACTGTGAGTAATAGTAGCGTAACGATATGTTTTACTTACTTCCCGTGATTATAATTTATATATTGTTGTTTGTGAATGGCATATACTATTGACATTGTGCTTTGATTGAATTAATGGACATAATTAAATGATGGCATTGATATGGACCTAAGGTCGTTTTGTTCCTATTAATAAAAATGGGCCCGAGGCCGTTATGATGTGAATTGTTTATGACTCATGGCCCTAAGGCCGGGGGAGATGGAGATCTGTCGATGTTCCGTCTACCCTATAATGATATGAACTGTATATGACTAATGGCTCTTACGCCAAGGGAAATGGAGACATGCCGATGTTCTATCTTCCCTATATTGCTCTGGACAGCTGTTGTAATGTTGGGCCTAGGGCCGTTTCGTATCATACATGGGCCCAAGGCCGTTCTGTATTACATGTGGGCCTTAGGCCATTTTGACATATGGTTATGGATAAGACCTGTATATGATTTACTTTATGTAGATTTATGTTCTCCAAGGCCATGCGTAATCACCTAACCTCCTTACATTGCTATTATTCACTAAGCCTTGCTCACTCCGTTTTTATGTATATTTATGTAGGTGAGCCATCAGGGACTAACACTAGAGTTGTATTGAGATCCACCTCTCTGTCAAGCCGCCCGGGTTACGCCTCAGCGTCGAGGCTTTAATTTTGTATTGGAGAGTTATGTCTTTTATTGAGTCTTATGTATTTGTGTGCGAGATCTATATAAGTTCTGTGATTATGTGTGTAAATATGGAAGTATATTTAAATGTTTAAATTAATCTAAGTCTTCATGTATGCACAAGCTCAATAGGTGTTGTCTTTATGTTGTTATTTGCTTCCACTTAATGCCCCGTATTCGAATAAATATTCGTGAAATTTTGTTTTGAGGCCTATGTACAGGCCGGTCATGGACCAAACTTTTAGGGGCGGGTTTGGGTCGTGACATAGAAACTGTTTGATATGTTTGACCAAGCAAATGGGTGTGATACACTTCTTGTGGATGATGTCATGTAGATAACCAATGTGCGCACTCTACGAAGGCGGGTTTGGGTCGTGACATAGAAACTGTTTGATATGTTTGACCAAGCAAATGGGTGTGATACACTTCTTGTGGATGATGTCATGTAGATAACCAATGTGCGCACTCTACGAAGGGCCCCAATCTTCTAAGCAATACAATTGTTTTTTAGAATTACATCATGTTTGGTTTCATTTTCAAAATTTATTTTTTTAATTATTCATTTATTTATTTTTGAAAAAATAGAAACTAGTTTGGCAAAATGTGCATTGCCAAACACAAATTTTATTTAGAAAGCTTTTTCTTGAAAGACTTTGGATAAAATCCATTCTTAGGAAGTCGTTACTTAGAGGAGAAGTCACGGGAAACAAGCCTAACCTATGGATCAAAAGCAAAAAAGCGTTGTAAGTCAAACTAACAACACCAAACATATCTTTCCATGACAAAACTTCCCAGTTATGTATAAGGTAGGTTGAAAGCCTATTTCACTTTTTTTTCTTGTTCTTCTTTTGAAGGGGGGTGGAAGCAAGATGAGAGTAAGATAAAATTTTTAAAACTCTTAATACAAAAAGAAAGTGATTATTACCCTGCAATGGCTAAAATGAAACGGCCAGATGTCTTTCTGATGTGACATGTGCTAAAACCATGCAAATAAAATATAACACAGAAAATTCATTCCACCAATTGTTTCACAAAAGCATACGAAACCAAGATGGCACAAATAAAGAACAAAGAAGAAAATGACAGAAATTTTTTCAAAAGAGTACGAATCTAGGATATTGCACTCAAGAGACTAGATAAATAACACAAAAGAAAAGAAAGAAATCAATGCAAGCAAGCTGAAAACTTCCATCTTTTTCCAACAAGAGATGGATGGAGTAAAGACTCAAATGCTCAACTTTTAGAACCCCAAGAACTTTTGATGCAGAGTATAAGAAGCTCAAGGAAAAGTGAATTCAAAAAAGCGATGATATTTGGAAATTGGAATGGTTTCAAAGAGGAATTGATAGGAACCGTATATAATCATGTTTCTAGTATTATTATAGTCCTATTTCATGACTATTTTTATGTTTCTAGAATTTTTAGGTCATGGGTATTTCGGTAATTTTATATTTGCTGACATCGGCTGTAGGGGTCGCCCATGGGTTATCTTATGAGTCAAGTTATTTAATTAGTTTTTATTTTGTTTCTTATCTGGTCTTTAATTAGTTTTAGAAGTCAAAGATATTTTAGTAGTTTCCTTTTTTGGTTCTAGTTTATTTAGAAAGTCTCCTAGTCCTATATAAAGTCATGTAATGCTTATAAATTAATGGAGTTGATATTTAATAGAATTTTCAGAGATTTGAAGCCTCTTTTGAGTTTGTGTGATGCAACCCTAACCCTAGGTGTAATGCCTATGAAGGTGCGATGCCTAGACCTATCTTCTTCTCTTCTTTCTTCTTTTTTTCTGTTTCAGTATACTGTTCACGAGCTGTTGTTCACAGGTCCTAAACAGCCCCTGTTTTGATCTCTTTCACCCGGTTTATTAATCCTAAACCTAGTTCATTCCATTCATTAATTGAAATCCTAAAATTCATATTGATTTTCAGCTTTAAGCAACCATAAAAACCACAGAAAGTCAGTTTTACAGTCCTTGCAGCCTCGTCCCTAATCGTCCTGCATCAACTTCCCTATATAAAATATAAAAAAAAAAATGAAATTAAAGTATTTAAACCCAAAACAATTTTTTATAGGTAAAATTAAAACTCGAAATGATTTGAGCTACTAAATTAAGTCCCAGGCATTGGAATTCTGCACCCAAACCTTCAAACATTTGGGATTTTCACACAATCCTCAACGAACACATGATCAAATGGCCATGCTACTAGAATGTACCAATAACTGATATATCATATGCAAACAACTCTATATGATGCATCACCACAACCTGCTCAATGGGTGACAATGAAAACACAGTTCACTTCATCCAATTTAATTTTGTTGCACCAAATGGAACTTATTTATTATACAGAAAGAAGCTAGCAGGAATGTTCAAATATGTTCACAGAACATTTATTCTCTTGAAAGTATATTGACATAACATTGTCTTTTGAAACTTTTTTGTCTACTTATACAGAAAGAAACTTTTTTGCGTAACTTTTTTTTGACATAACATCATCCAATTTAATTTTTGTCTTTGGACTTGAACAAAACTACATCAATTTATCAAAACCTAGCAGCAGCAAGTATAATGGATGGCATGTGTAAGCTAAGAAAGAAGAGGCAAGAACTCTGAAATTAATCAAAATTATGTATGCATTTCCATTTGTAATAAAATATGTTCAATTCAAATGAAAAACATAATGGGATCACAACAACAATCTATCAAGTTTTAATGGTGAAATTATCATATGCAGAATACAACAAACCGCCTAATGGACTATAAACACACAACTTGTACACCCAAACATCAGTAGGATCTTGCATGAACAAGATCGAATCAACAATCTTAACAGCATGATATGCTAAGATACATATACCATAAAATATTGCTCAACCTGTTAGATGCAAAGATGTCCAACATAAAAAGAAAACAAATCCAAATAGCAATGCAGCATAATCT
>MSTRG.7021.1 Scaffold1141 99069-100638
CAGCAAACAGAGCAAGAGAAAAGGCACATGGGGTAAAAATTGACTTATAACATTGTCCAATTATTTCAAGATGGTATACAGCATCTTGGACGTGGACTAATGGGAATTTGTGCTCCAATTCAACATTCTAGTGTAAGTTGTAGAAATGTTTTTATTTTAATTTTTAGCCAAAGCCTTTTGGATTCCATTTTAAAATAGTATTTTGTATGCATTGAACGTTGAAAGCATATGGCTTTTTTTGAAATGTGCCTTCTGGATTTTTTGAAATCTCCAAGCAGTCAATGTTGTATGCTACATTCTAATCGTGCTTTATTTATATATTTTGTTATATCTATCTTTCTAGAGAAAAAAAAAAGGCATAAATTGTAGTGCAAGTTTTTTTTAAGAAGAAAACAAATTGATAGGTACTATTGTTCCCGTTTACTTCTTGAAGGTGAACATATAATTTTTTCCTTAGCTGCTATGTTTGTTGTAATCTTCTTCACTTTGGTATAGTTTTCTCTCTTGCAATTGAAGGTTGTTCATTGTGGCTTGCCATACGTAAGTGTTCCATGGGAGCTAATTTTAATTTAATTTAATTTTTTTTTTATTTAAATGGATGGCTTTTCTAAGCTAATATTTGGTTTAAAATTTGTATGGGTGCTTTAAGTTTTCCATTGTCCCATGTCTCCATGTTGATGCTAGAGATAAGAATGTCATAGTACCACTTGACATAAACAAACACACACCAGCCCCAGAATTTTTGTTCAAGAGTTGTATGGTTATTCTAGATTGCATGTGTGCACACATACTAGCACGGTGGGTAAGTTCAAGGTTAGGTGGGTGTGTGATTTGGGACTTTCTCTTGCCAAAGTACTCCTGGCTTTTGCCAACTCAAATGACTATGAATGGAAACAAAAAAATGTCCTCCTAAGATTCAATTAGGA
>MSTRG.140049.1 Scaffold776 253143-253565
TGAGGAGGGGCGGGGGAGGCTGACCGAAGCTCGGGGGTGTATGGGTGCTGTGGCGGCAACTGGGGTGGACGATGATGGTAGTTGCCACCAGAGTGGGGGTTGAGAAAAGGTAGGTGTCCAAAAATTTTAGGGTTTTTGTACTTCATTGAAATTATACATGATGGTGTAATGGTATTTATAAAAATCATTAAATGTGGATTGTCTAACCAAAATTTTAGGGTGCATTAAGAGGCTCCCAATTTTCCCAATTTTTCATAGCAACATGTTATTCATTTATTATCTTGAATCTGTAGCCCAGTTTCCATGTACATACTTTTAACCATTTCCATGCTGTCTTGCGCCCTTCTAAGCTTAATCCGGGTAATATATACAATCT
>MSTRG.105256.1 Scaffold4381 147587-148945
CACTGGAACTGATGTATGTTTCTGAACAGGTTACATGCACTTTGCAAGTACTACAAAAGTTGCTGCAAATCAAGTGCAGGCTTTGCAACGATCTATTTAGAACCTCTTGAAAAGGTTGTGAGAGGACACTCTTATCTTAGTGACCCACTCAATCAAACAAATAGGCATAGATGTGGTAGTGGTACACAGATAATTGGGCGTAGCTGATCTCTCCAAACCCAAGTTTCAGGGAGAGGCTGGTCCATGCCGCTTGACAATTTATTTCAAATTACATTGTTTCCTTTGGGGATATATGAGAAATGGATTTTACTTTGCCAAAAAAACATGGACTCTAAACCGAACTCTCTCTCCTTACTATTTTTTTGTTGGGTGGTGGAGGGGAGGTGGGGAGTGAAATTTCCAATAGTTTCTGAAGCGGCAAATGGAAAAAGCAGGATACACCATGAGGATATGATGTCCAATGATGATGTAAAAATGTCACCACAGAAAACATTAAATAAAAGCAATGGAGTCATGAAAAAGAGAGATCAAATATGTTATAAAATGCGATATGAGAATTAAAATTCACATGAATAACTTAGCTAATCGACAAATATTAGTAATAGCAGGGGGTTCCACAATCAATTCAACAAAATGACACACGTAGAAACACAATAGCATAGTTCTAATATCATGTCATTGTAAATCCTTATTTCTAAGGGTGCAAAATCTTAGAAAGACAAGGTCATTTCACCATCTATTCTAGCCTTTCTAGGCGTCAAGTATCTCATGACTCATGAGATAAGGGCATTATATCAACTCCAGCAGTTATAATGTTCTGAGTGGTTAGCATTCACCTGAAGCCACATAGGCAAATGTCAAATATTCAAACTTGTTATGCATAATATTTTTATAATTCATATTCAATCAACAAATATCAGTGCATACATTCCAACCAATCAATAAGGAAAAGTCAACTTTGATTGCAGAGAAAATGGAAAGAGAAAAAAACAGCAAAAAAAACACAGTGATAGTTAAC
>MSTRG.84198.3 Scaffold344 3834981-3856597
CCCAATTTATTTTCAAGACTGTGTGATCAAATCTCAACTTCAATTTTTTTTTTAAAACCCTTTTTCAAAATAAAATGCCTTTTATTTATTTAAATTCTGAAAGTTTTCCATCCCTCTTACTTTTCAAATGTTTTGAGGAGTTCGGATTTTATTCCAAGGAATCAATCAAACGATCATCCACCGGCCAAATATCTTATAAAGGAACCAAAATTTTATTCAGAATGAAAGACTTGGTCATCACTTCCTTGTCTAACATTTCTCCATAAAATTAAGGTTCCCTCAAAGTCAGTGGCCCAAGGATTTTCACTCGACGAAAAGAACTTTCCATAATTTCCGAACTCTACTCAAATTTTATTTTCAAAAAATTTCCAAAGAATTTAACGTCTTATTCGAAGAAATCAATCAAACAGTTGCCTTATAGTCAAATGTCTTCTAAGGAAATTCCAAATTTCATTTCGAAGTGAAAGACTCGGTCATTACCTCCTCATCAAACACTTTTCCACAAAATCAAATTCCCTTTCAAGTCAAAAAACCTAAAGATTTCTGTCTGATCAAAAACTTTTCATAATTTCTAAAGTTCTACTCGCGTTTTCTTTCAAAATTATTTCCTCCCTAGGAGCTTCCGATTTTATTCCAAGTATCTAATCAAACAATCGTCTCCTTAGTTAATGATCTTTTGGGGGATTTGGAGTTTTATTCAAAGTGGAAGATTTGGTCACCACTTCCTTATCTACCATTTTTCATAAAAGCTTAAATTCCCTTTAAAGTCAATGACTTAAAGATTCTTATTCAATCAAACACCTTCCATAACCTCCAAGGCTCTACTTAAGTTGGAAACTTTCTTTTTCCCAGAAGTTTTTCTTTCAAAACATGTTCTATTGGGGATTTAAATTTTAAAAAGGCAAAAATTCTTCTCTTTTGATCACTAAGGTAAGAACCCAAATTCAAACTCAAATTCTTTAAAATTGGGAGACAACCCCCCTAATCTACTACTGATTACTCAAATCATTATCAGAATACGAATCACTGCCTAAATTAACACCCAAATCTCTTAAATTGGATCATTGCCCCAAATAACTCGGATTGCAGCAGAATCAAATCACTGCCATATCAAAGTCCCCAGATTTTCGGAAAGAAATCACCGTCTTTCTCGTTCTTGATCTCAAGAATCAAATCAAATCAGTTTCAAAATATCACACAAGCCCCCATTCGTGCCTATCGGGGGTTAGGGTTGCCCTGTCCTAATTGAGAAATGAGATCTACGATTCACTAAATCATTCAAAGAGACAATAACAAAATCCTAGAAAGGAGGGCATCCTGTCCTAGTTTGGACGGCGCTAATGCTCTCTACATGCAAGAGGTAAGTTTGGTCACAAAAAGCCACATCAGTTATTACTGTCAATGTACCACTCCTTCCGCAAGGGAATGATCAAACAGCACTAGCAGCATAATCTGATGCTTGCCTCGTTCACATAACATAACCCACGAATAGTGTCCGGGATATTATGCAGCAAACCTGAGGATAGGTGAATGGACCCAATCAAATTTGTTTAACACTTGCCATTGGATCTCGAAGTCATCATCATCACCCATTGGGTGATAGTTGCTCAACCAAGGCAATTTTGAGGAATTTTAATGATTCCTACCAAAGTGATCAATCTAAACAATTGTCTTTTCGTTATTTATTGTTTCCCGAAATTTGACCCAATTTATTTTCAAGAGTGTGTGATCAAATCTCAACTTCAATTTTTTTTTTTTTTTTCAAAACCCTTTTTCAAAATAAAGTGCCTTTTTTTTATTTAAATTCTCAAAGTTTTCCTTCCCGCTTTTTTTTCAAATGTTTTGAGGAGTTCGGATTTTGTTTAAAGGAATCAATCAAACAATCATCCTCTAGCCAAATATCTTATAGAGGAACCAAAATTTTATTCAGAATGAGAGACTTGGTCATCACTTCCTTGTCTAACATTTCACCATAAAATTAAGGTTCCCCCAAAGTCAGTGGCCCAAGGACTTTCACTGGACGAAAAGAACTTTCCATAATTTCCGAACTCTACTCAAATTTCATTTTCAAAAAATTTCAAAGGAATTTAATATCTTATTCGAAGAAATCAATCAAACAGTTACCTAAAAGTCAAATGTCTTCTAAGGAAATTCAAAATTTCATTTCGAAGTGAAAGACTCGGTCATTACC
>MSTRG.45609.1 Scaffold209 1585326-1586053
TTTGGATTTGTCTAAACGATCTCATTGTGCTAAAAACTATGGCTTCAATGAAGATTTTGATACTTTTTTTTGAGTCTCTGTTGATTGTTATGCTTTTGCTAGCATTTCAAGTGGCTTCAAGAGAATTTGTTGGAATTTCTCGTCCTCGCGAAACAGCAGCAGATGCTCCATGGGGTCACAATTACAAGAACAGCTATTATCGTGCTCCTCAGAAACCATGATGATAATTGTTGTCATTCAAACAAATTTCAC
>MSTRG.22037.2 Scaffold1492 829806-833674
CAAGAACGACAGAGAGGCGAGACGCCTCACTGCCTGTAGATCGGTTCGAGAGGCTTGAGAAAGCTTTGGTATGCTGGTCTTTTTTTCTTGTTTGCTGCATGTCTATAAATCTCTCGATTTGTATCCAGTCATGGCTATGATTACAAAGAGAGTGGCTTGAGTGGGTTTTCAGATCCGATTCGATGTATGGCGAGAGAGAAAGTCATGATGTTGAAGATCGAGTGACTAAGGTGCCGCCTTAGGGCTCTTGGGGTCTGAAATCACAAAAATCTCTTTTGATTTTCTCTCTCTTCATCTTCGATTTGGGGTTTCTCCCACAATGACAGACTTCCAAAATTTACGGTTGATATGAGCCCTAAATTGGCAATACAAAAGAATTTGTGTTTGTGTTTGTGTTTTGCATTTGTTGGGTTAATTATGGAGAGAGAAAGGACTTTTTTGTTCTTGTGTTCTCTATCTGAAACAACAGTGCATACATTGAAAGTCTGATTTTACTTTGAATTTACGCCAAACAAAACCCAAATCTGATACATTGAAAATCTGATTTCACTTTCACTTCTTCTTAGTCTGTTTCGTATTTGGGCTTCATTCTTGGTTCAGATGAGAGCTCACAAACCTTTGAGAGGTCAGGGGAAAACAAAAAAAAACAAAAATGATCTTATATATATACATATGTATACATATGTGTGTGTATATATATATAGATGATTGGGTGTGAAGGGTGGGTTTGTTTTGTTCTGTTTTACACTTGGTCAAAATGAGTTCAGGCCTTTTCAAATGAGAGAAGAAAACAGGTGCAAAAGGAAAAGGAAGAAAGAGAGAGAAAAAAAAAAACAGAGGTGTTCTTCCTCTTAGATTTGGTTGTTTGAATGTTTGAATGGGTGTTTGAATCTCACTTTTTGGAGATTACATGATAATATCTAGAGgtgttcttccgcttaaaaaaaacgtctcttattgcctctagaatggaaatcacggctttaaaacatgttcttcctcttagatttggttcttcctttggtt
>MSTRG.116859.1 Scaffold528 379011-526609
GCCACTGCTAATGCCACTGGCTGAAGACTGAAATCAAGAGACTGCTTCACGGGTAGTGATGAAGTGAAATTGAATGAAGATGAAATCAAGAGACTGCGGCAATAATGCTTCTTGGTGCATTCTCAATTTCACTCTTCGCCAATGTAAAGGTAACAGGTTAGGTAATCTTAGACATTTAGGAATCATAGATTTGTTAATTTTTGTTCGATTATGATTTTGCACATTCAAATCTGCATATGAAGAGTAATTGTTTTTGGTAAAATCAATGTTATTATAAAGTAATCCTCATTTTCCTACTCTGAATTTGAAAATTGTGCACACAAACAAATTTACCAGgtgaaagtatattctactaaaaaaattgaactgtttaggcttgaatttgagatacaatgccaatttctatgtaactaaggtgcaatgtttgctctacacatttgtggtaccaattgcggccttgatgctatcagagac
>MSTRG.126079.1 Scaffold6164 397258-703444
ATCTGCATTTTTTGAAAGAAATAAACAGTGTTAGAGACCAAAGCATTACTATTCCGTGGAATGTAGAAACTTGTGAAAATTAACTACTAAGAGATAAAAGGTCAATCCCAAAGCCTGATTTCTCCTTTAATTTTACAAACTAGTGTTCCATTTGGCTTCTTGTTTTTCAATTTGTACAATAAGAATTTTTTACTTTCAAAATGATCTTGCGGATTAACTGCATACCATATTTTTTTATTTAAAAAAACAATCCCCAATGTATATTCCAGGGTAATTACACTCTCATAGTTTCACTTTGTTCTTGGGGCTGGACTATCTTTCTGTCCAGA
>MSTRG.108767.4 Scaffold4631 801870-818829
AAAAAAAAAAACCGACTAAACTACATCAAAAGACTAGAGCAGCTGTGGGACAAAATTGATTTTGGTGAAGCAATCCAATTCACGAATCCAACAAATTTAAGTTCGTTAACCCAATCCATAATAAATCTGAAATTGATAAAGCAAAATCGATTTTGGCGGGACAAAGAGGCAAGAGCGAAATAATGAGCTCAACATCTAGTCCTCATCATCGATACAAGATGCCTCTCTTGCACAGATCCATCTACAGAAGTAGAAGGGAAAGAACTAGGACCTGACTATTGGGAGGTACATGTTCAAGTGCCAGTCAAACCTAATAAGGGCTTGATCCAAACATATGGACTTGTCAAAATAATTGGACAAGCTATTGGAGCTCATGTTGCTTGGTCTGCTCTATTTGTGATTTCGTAAGTTATAGATGCTAATCAAGAATACTTATACAAGCGAGGTTGAGAATTTGGAGACTGAATTTGTTTTGGTAATTTGTTTCTATAAAAGATAGATATAACTATGGTTTTTGAGAACTTATAGTTGGAATTTTTATTTATTTATTTTTAAGCTTTGACTTTGTTGGTGTGGTAG
>MSTRG.70254.1 Scaffold288 554255-568106
CTATCTGGTTCTCTCCATCTTGGCTCAAAGCTCTCGATCAGTCCGATTTGAAGATTAATTTTAGTCACAGAACCACCATCACAACCATACTGTGTCAATCTTTGCAGCAGCAATGTCTCTCTTCCTCACAATGGGTTTTGTGCACCACAGACACCTGATTTCGACTCTGTGCTGTTTTTGGAGCAACAAAGTTGTGGCAGCTGCAAAAAGTCCTGGATGCATGCAAGATGGAGCTTAATCCTGAAATCATTGCAGATATTGACAAGCATTTGTCGCTAGTTCATGGAGGCTAATGTTGACTGAGCATTGTCTGGAGTTTGCTTGATGGTCTAACCAGCAGCATATATGGAGTCAAATGTTGATTGAGGCTCTCTCTGTGATTCTTGGAAGTTTCTGTTGAATAGCATGTAAAAGAGAGAACGCTGTCATCTAGAACGCGAAGCTACTATGGCAAAGGGATCTGAATCAACCTAAATGGATCTCCCCATGTTAAGAGGTACAGATGAGATGCCGCCTCCAAGAGTGTAGCTTAGGAGGTTTAGAAGCTGAAGGCTTATTTTGTAGTTATCCTTGTATTACATGTAAATCAAGCCAAGGGCTTAATATGTTTAGAGTTAGAACTCTCTTTTGTTGAATCCAAGTGTTGACTTGGAAAGTTGTAAGCCCGTAGGGCATTTACTTTTGCTGTCAACATGTAATACTTTTGTACTAAATACTATGATAAATAGAAATATGTTTTATTCTCTTATGCCTATGGATGCCATAAATGTTGGGTTTATATCTATTATTTTGAGGGCGTTACGAATACTCCTCATGAGTTTGGTATTCTAGGCCTTAGACACTATCTCGTTTGAGTTGATAGCATTTATTTACGCTTTTCTCACTCATTTTCAGCACTTAATCATCTCTACAATCTCCCTTCTTTCTTCACTTTTATTTTGCTTTGAAAGTGATTCAAACAATTTGTTTGTTTAAAGCATGAAATTGAG
>MSTRG.92784.8 Scaffold3809 786101-802054
CTCTCTCTCTCTCTCTCTCGTCTCTGTTCTGCAGCTCTACTGTCTCGCCTTCGCTTGTGCCGTCGCCGTCTCGCACCAAACCCCCATCTCTCTTTTCTCCTTCTACCGACACACCACCACCAATAGACCATCGTACGTCCTTCCGCCGCTGGCGGCGACAGATGCAGCAACGGTTGTGTGGTTCCGGTACCGGTGGAGGTTGTTGACTAGTCGTCGGCTCCTCCGGCTTACTTCGGATGACTGGCCTTAAGATCTACAACATCTTCTCTCCTCAGATCTACAACCTCTTCACTCTAGTCCGAGTTCTCCTCATTCTCATCAACAGTCGATCAATCCAAGGAACATTGGATGGAAAGGAACTAAGAAGAATGGACGCGAACACGGATACAGACACCTGACAAGACATGAACACGGGTTTGCGGACACGCAAATTTAAAAAAAATACTGGATACGACACGTTGGGGATACGTGCAAAATATATTTCCTCCGTCTCAAAATATTAGTCCCTTATTCCATTTTTCATTGCCTCAAAATATTAGTCACTTTTCAAAAATTAAGAACTAAAATAATGTGAATTTCCTATTTTGTCCTTCTTTTAAATTTATTAACACAAAAAGTACAATTATGACAATTGATATTTCTCAAAAAATGTACTATCAAAGGGTAATTGGAAAATCAATTTTTTTATAGTGCAATAATTGTACTATAAAAAAAAGTTAGATTATTCAAAAGGGACTATTATTTTGAGATAGAGGGAGTATAATTTTATATATTTATTATATTTCATATTTTTAAATATTTAATATTTATTTTATTTCAAATATTAAATTTTATCAAATTTATCAATCTTAAGTATGTTATTTTAGTAAAAAAATTAAAAATTTAATTTTTTTGAAAAAAATGGTCCTCTGTGTGTCCTCAACGTGTCCTCGGCGTGTCCCCAACGTCTCCTTAGCTTATCCCAGCGTGCCCATGCTTCATTGGAAAGTTACCTTTGCCAAAAGACATATCAGCTGAGGGAACACCAATATGTTGTACAAAGGCTGCATAATCTGATCCCCCACCTCCTAACCTTCCAATCTTCATACATGGAGTTCAGCCACTGTCACTATTGTTTTTGGTAATTCTTTGGGGTTACCTGTTGGGCGGCTTGTTTGAGTAGTTCATCAAGCTGTGGAGTTGCAGAGGCGTAGAAACCTGCATCATCTACTGCAGAATCAACATTCAAATAAGCAACTACTCTTGAAGCTATCATTTCCC
>MSTRG.62597.1 Scaffold2606 971700-974957
TGACAACAGACGGAATGTAAATAGCACGCTTAGGTTAGGAGTTAAGAGCCAAAAACGCTTTAAACTTAGTCGAAAAATGGCGTTTCAGGGGCGAAAATTCAAAACAGTCCCCGAACCACCATGTGGCTGTCAGGGACAGCTTCCCCGTGACAAATATGACCTGTGACAATAGACGGAATGTAATTTGGACCCGTAGATTAGGAGTTAGAGTTGAAAACGCCTTAAACTTAATCGAAAAATGGCGTTCCGGGGGCGAAAATCTAAAACAGCCCCGAGTCATCGTGTGGTTGTCACGGACAGCTTCCCTGTGACAAATATGAAATTTCAGCTATAATAAAGCAAATACAAAAAGTAGAGATGGTGTAGATCTCCTTAATAGAACAATTGGATAATAAAAAAAATTGGGAAAAGAAAATCTTGGGAACATTCCTTCTCTTTTTTTTTCATGGTCATATTAGGACTTGAAAACTTGTTTATTTTGATGGGCAAATTACATACACCCCACTTGAAGTTTAGCTAAATTACATATTACCTTTGAGGTTTCAAAAATTACATCCTGCCCCACCGCTGGGTTGGCACCAATGGGGCTCTCTGATAAATAGACTACCAATGTGACTTCCTTGCTAACATGGGCTTCCTCCCAAAATTTCACCTTGGGCATCCATAGGACTCCTTCCAATGGATTTCTTATAACATTCTTGCTGAGATATTGCAAATTGCTACCCCTAAAAGCTTTTGACTCCATATGAGCCTAATCACCATTGTTTCTGTTTTTGTTTAGTTTCTAATTACTTAAAAAATAATATGATTTTGTAATTGATTCCATGAAAATAATAACTTTCAAGTTGTATCTAATTTATTTATTTATTTATTTATTATATAATTGTAAATGCGAATGTTATTCAATAAAATGTTAATGGATATTA
>MSTRG.9638.1 Scaffold1188 232852-264352
TTTGTACTGTCCAACCTCTTGGTGGGGATTCCATTCCAGTTACTCCTCCAAGGAAAACTGAAGGAGAAACAAGAAATAAACAAAAACAACAAGTAGTTCTTCATTAAGAATGACACTTCTTGTTAGAGTGGAGTTGAAGCATCAAGTATTGAGTTAGTTAGGGAATCAATATAGAGTTACTTAGGACTTTGTACATGTTAGCAATTGTTAGTTAGCTGAACTTGTTTCAAGTTGTTGCAAGTAGGGGTGTTCACTTGTCAGTTTGGGTTGGGTTCACCCTTGGCCTGTCAACCAAATAGAACACTTCGTATTAGGGAATCATTCATTCAATACTCAACCGTCCTACTGTTCAAATATGACTGAGCCAAATTGATGGTTTTGCAGTCGGTTTGGTATACACATGAAAAGCAATATTTCTCGGTTGGGTCAGGTTAATTGGTTGGGGTGTATTCAGATCCGAGACCCATCCGCCAATCCGAAAATATCTTGTCCTTACAAT
>MSTRG.74371.4 Scaffold3000 358690-361744
AACAGATCCAGCAATCACTACATACCAGAATGTTAGCACCAATACTAGTTCCAACAGCAAATAGAGGAGCCTTGGCATATTCATGATGAAGATAATGAATAACTTCACTTTTATGAATCCAACAAGTTAAAGTAGAGTTTTTCCCCTTTAAAATAATCCCACAAGATGTATAAATAGGTCCCTTACTAATCCTAGTTTAATCCTTAAAGTAAACCTTCAATCCAAATTCAACAAAAAGTAAGACAAACAATCCCAACCATACAAAAAAATTCAGATTATTTAATATGAGATTATATAGGTGTAGGAGTGATTGACACAAAGTTTAAAATAACTAAAGCCTAAATGGGTATCGAAACATGGAATTAGGAAATGGTACAAAAGATTGTATAGCAAAAACAAGTAATGTCAGCACAAACCTAAAGCAAAATCACCAGCCTAAATACTTTACCCCAGGCCTGCTAACCAATCCCCCTAATGCAAACTTTGACTTTTTGCAAGTTGAAAATAATATCATTAATTGAAAAATCCAAGGAGGGGCAAGATACTTTGATCCACATTGCAATCCTTAATTTAATAGTCTCACACAGCTCCCCAATTTACCAACAATTCCATTTTAAATTAATGAGCTCGTCAAAACAACTCAAGAGGAGCACAAGGACATTGCAGAAACAGAGTGCAACCAGTGTAATTTTTCAAAACAAAGTTGTGATTGACTTT
>MSTRG.21381.1 Scaffold14782 97332-109394
CTAAACTAGAGTGAAAAGGAAACCACATGATATAAATCCTTTTATAAATAAATTAAATAAAGAAGAAAAAAATTAAGAAGTCAATAACAGACCCGCTTTGAGGGGAAAGACTTCTTGTTAGTTCAATAAAAAAAAAAAAAAAAACTAGACCTCCATAACTTCACCAAGAAGTCGATACAAAATATTCCAGCCTCCCTTTCTATATATTGATTGAATACAACCTATTTAAATAGAATAAATTAGATACCTACTTAGTAAACCTACTAATATCCTAACACATACAATCAAAATTCCTAATTACTAGATAACTGCTACTGTGGGGATATATTTTCTAAGTACCAACACATGGCAAGGTGACGCCGACGTGTCAGCCGAGGTGCCACGTGTCCTGGTCGTTATGGCCGAGATTATCTCCAAAGATATCGGAATCTGAGATAAACGGATAAGGCACAAGAGTCCTAGGATGATGAGGGGACTCAGCTTGGATAAGGATAAAGCTCTTAGGGAGTTTATCTCTATCTATGGAAGAGTCCTGGATAAACATTGAGCAAAAGTCCATTGAAGCTAGGCTTCTGTTGGGACAATGATTGAGTTTACTATAAAAGAGAGGCACCCCCGATGGGTCTAAGGTACACAATTTATATTCTGAATAGTGAGTTTAGCACTATTGATTATCTTTGAGAGATATACT
>MSTRG.54315.2 Scaffold2323 1210662-1212118
ATGCGAATAAAAATAAATAAATAATTATGAGCTAAACAAACCACTAGGATTATAACAACATACTATGAAATATAAAGTAAGAAAATAAATATGAGATAAACAACTACTTGGATTATAACAAAACACAATGAAATAAGAAGTAAGAAAATAAATATAAGATACAAAATATAAGAAAATGAAAGATTAAAAATTCACCTTCCAAAGAAAGATTGAACTTCTTGATTTCCAAACTTCCTCTTGATTACCCTCAAGTGTAGGAAATGTGTTCTCAAATCCTTAATTCGAAATTATGGAGTTTATGGAGTTTGTGATATGAAAAGTGGTTAACTCTCTAGTTTTTTTTCACTTTCAATCACTAAACATTCTTCCTTATGGTCGAGGCAATTGATCTTTGGCTATATCAGAATTTTTGGAGTGGTTTTGGTGTATGGAAATGAGGAATTTCAGCAGCTATGGAAGGTATGAGGTGTATATGGAAGATAAGAATATTTTTGGTTCAAAAACTCAATTTTTCTCACTTTTTTCACCCTTTTCTCACTCCTTTCTCTTCAATTTCGTGGTTCTCCTCCTCTCTTACAATATGATCATTCTATATAGGCAATGAGGGAGAGTAAAGGTCAAAAAGAAGGTGGGAGACAAGGTGGGAGACAAGAATGTGATAGGAGGGCAAATTTTCAAGGTGGTTGCATGGGATACTCCTTTATGGATGCAAACAAAACCTCTTTTTGACAATGGAGGATGATTAGGTATAATGGAGGATGAGTGGATGCACTTGAATGGCTCAAAAAATAGGTAAATGGGTTGCCCCAACCGAACCAAAACCAAGAAAAATGGGCTATTGTTGTTTTGGGTCGAATCAACAAAATCTGCTTTTAAGCCCAACTTCAAATGGACATATCTCCGCCATATGGACTTGGTTTTAGGCAGTTCTTGGGTCTAAATTGAAGCCCCAGAAGTCTACTTTCCAATGGTGGTGGCCTCACATTTAAATTCCAAGTGTACAAAGAGATATGCCTAATTTAGTGAAGGCTGTCTCGGGCTGGGTCAACAAAATCTGCTCTTAAGCTTAACTTCAAATGGGCATATCTCCCTTATTTAGACTTGGTCTAAGGTGGTTCTTGGGTCTAAATTGAAGCCCCAGAAGTCTACTTTCCAATGGTGGTGGCCTCACATTTAAATTCCAAGTGTACAAAGAGAAATGCCTAATTTAGTGAAGGCTGCTCATTTCCTTCTTAATGATTTGATACTCATCCTTTTCCTAAACCAGCT
>MSTRG.15689.2 Scaffold1332 591373-596347
AGCTCTCTCTGTCTCTCCACCTTCCTCACAAACCCTCACTCTCTTCATATCTCCACCATGAGTTTGTGAGCAGCGACCACTTCATCTCCCTCCTCACAACTACCGTCGCAACATAGTAGTAAGGCTTCGGCGATTGAGACTTCAGATCGAGGTCGACGATGAAGTGATGATGGGCCGAGAACGGATTGAGGCCACAAATCCAGTAAAAAATTGCTTGGAGAGATACAAAATATGGTCATAGAATTCAAGAACTTTGTATTTCAAGTTTTTTTATTTTTTAATATATGTAATCACAGTTAAAAACTTTTTATTGATTCTTTTGTATATACTTTTGAACATTTAACTTTTATTTATGAAATATGTGAC
>MSTRG.107758.1 Scaffold4554 748478-750427
TTCATAGGATAGGTAAAATTCATTTGATTGACTCTTATGATTTACGATTTTTTTCATCCATTTTTGTCGTTGATCTGTCATTCCATAAAATGAGTAGTATTTGAATGAATAATTAAAATAAAAAGTAAGGTTAAAGTGAAAATATAAAAAAGTGAATAGACAAAATAAATTATATACATTATAGTAACTTTTTCGATAAGTGAAATGTCTAATAACAACTAACATGAAAAAGTCCTCAAAATCAAATTGGACACACAAAAAAAAATAAAAATAAATAAAGTATTCCGACCTTAAAGTTGGGCTATGATGGAGTAATATTTTAGACCCGGTTATTTTTTGAGCTGAAATTGAGATTCAAGTTTGTAACCCAGCCCAGCCCAGTTCAATTTTAATATATTTATTTTATTTTATTTATTGATGTAATATATTAAAAATTATATAAGTCCTTTTTAGGGTTCAATTTAATTATTCAATTCTTCAGTATAGTAGTGTTCCCATTACAAGTTGGTTTATGATTTTCGACACTCTGCTTAATAATAAATTAATTTTATTATGATCTAATGATGTTTGTTGTGTATCTCAGCAAATTGGAAGTAATTGATACTTGGGCTTTCAAATTCACCAGTGGATTAATAGAGATCAGTGGAAGATGAGTATAGATATTCTGCTTCTTTCATGGTCCCAAGAATCTGAAATGTTCTGCTTTGTTATACAGGTAAACTCGATCGGCAGCTTGGAAATTATATTTACTTTAGGGTTGAGGTTAGGAAAATTCTATTTGCACACCAGAAAAAATCTCAATTTACAC
>MSTRG.39793.2 Scaffold1911 571915-572341
CCCAAATCAAAACAACCAGATTCACATGCTCCGTCTCCTTCAAACTGGGGACAATTTGGGGAAAGTTCATCACTTCACGCCAATGCTCCGAGGGCAGAGAATCCAATCTGTGAGTAGGCTAAGGCTATTAAACAAACATCGGATTGGATAATAACAGGTCAGCGCAATCAAACTAAAACCCCATGGCTCTGCGTTTTGTTCTTGAGAGGACGGTGAGAATCAAAACTGGGTATGTCAATCCAAAGCTTGGATTTTGGTTTGCCAGCAGCGCTTTCAAACCCCAGTTGTATTCCTCTTTGCCGCGTACTGACCATTATCCTCTGTTTGAG
>MSTRG.46701.1 Scaffold212 1864146-1867453
AACATTAACACCACATAAAACATCATGTATACATCATTGTTACTATACATCAGGCGTTAGTCCAGTCGTCAAGAGTTAATGTCTAATCCTACTAATAGAAAAATATAAGGATTAGACTAGTCATTGTCAGCTCCAAAAAAAAAGATCAGTGACATCTCTCGGTCATGCTCCTAGAATAGGTCACTGAGCCCCCACGAAAACTGGCTTTGGAAGACTGGGTCGTTGAACAGCCATGGGAACTTCTGCTACACGAGGGACTCAAACTCCCATCCACTGAGCTCAATCCCAAGACAGCGCTAAACTACCTGGGCCATGTAGGTCAGTACACTGTGGACATATCCACAAAACTGCCGCCCAGTTAGCCGTACAGGTATCTCTAAGTATGTGGTACTGTTAGCGTAGTCCACAGCTAGGGTCTGGACAATGTGTTGTGGAGGAGGTGTCGTAGTGCGAATGTGGCTGCTAGGGTATGTATTCCCTCTCCTCTAGGCAAAGCCTGGGGGTAAGGGAGCAACTAATAAATGCGGATGTACCAATCCGACGACGTACGTCGGCCCAATGTATATCTCTCAGGTGCTAGCCCGGCTAAGTCTCCAAAACAGGTAGTGCTCGTCACGGTCAGCTTGCAAATATACTAGCCTCCCCATGAGTCGGTCAAGGTCGGGGTGGGTCTATCTGATAGTGCTTTCTGAGTCTCCTCATCCCTCTAATAAGTTAGGGGTGGGGCTAGATGCGCTCCTTGAGGCTCGAACCAAATCAATTCTTCCTGATGTACCA
>MSTRG.139787.2 Scaffold773 329031-386150
CGGCCGTGGCATGACATGCTGGCCAAGGCCGGGGCATGGCAAGCTGCTGGCCAAGGCTTTGGCATGCCATGTTGCTGGCCAAGGCTGTGGCATGGCATGCTGCTGGCCAAGGCCGTGGCATGGCATGCTGCTGGCCAAGGCCGTGGCATGACATGCTGGCCAAGGCCGGGGCATGGCATGCTGCTGGCCAAGGCCGTGGCATGACATGCTGCTGGCCAAGGCCGTGGCATGACATGCTG
>MSTRG.7214.1 Scaffold115 586428-587574
ACATTATGCAAGACAAAGAAAATAAATAAAATAAAATAAAAAAACTATGTCGTATACATCATCTTAATTCTTCATAGCATCCATAAGAGATGAAAAAAACTAGATCCCACCTATTGAACCAAATAAAAACAACTTGGATTTGGTTAATGATACAACAACAGATATCTTCCTCTCTTTTTTTCGATTGGAAGCAAAAATAAATATTTCGTACTGTACGTTAGGTGGACATATCTTTTCAAAAATCATTCAAGTCTCCCATGATTCAAGCACCAAAACTCATCTTTCCTTAAACAACCATTAGAAACATCATATACAGGTCAGCATAGAAAACCATGTCAATGCTGTTGTCACAAAGACCATATTTATACACGGCAGTCAAGGATAAAACAGTGGCTTTTTGACACATTCATTGTAATCTGGCAATTTATCTTCATTAGTGCATGGGATTGCCATTCAATTGGAGAAACTATGAAGTGCTGATATAAATCTTTGGTTACAAAATAAAATCCATAACTCAGTCTAATTATCATGTTAAAACATTCTTGCATCATGTAAAAATCTATGAAATGCTACAATACTGTTAATCTTTTTCTGCCCTTCCTGTTTTGAGTAGGCCTCATTTAGCTTTGTTGGTCTGTTTGTGTATTAGTTAGAATGAACATTATTGCTAAAAATCAAAGTCAAAGTTTACTCATTCATTTCTTCAAAGTTCAGCTGGTAATGATGATTTATCATGACAATTATTTCTATACTTCATGATAGACACTTCGATTTAATTATGAACATGTCAGTACCTAATTGTAAAAGTATTACCTCACACTTGAATTATATCTA
>MSTRG.88269.1 Scaffold3611 672653-674046
ACTACGTGAATTGAAATAAACATTTTTTAAGTACTAAATAGATACAATTAATAACTTATAGATCAAATAGAAAATAATTTTATTTTTTGATAATTTAATAAGTAAAAATGAAATTAATATTTGTTTTATGCATTATAAAATGGATTCAAATGATATTCATCCATTTTGCTTTCTCTCCATCTGTGGGAAAATTATAACTAGATGTTTTAGTGCAGCACCACATAACCAAAAAAGCCCATACTACTCTCATTAGTTAGGCCTCTGTTGATGGGATTTTGTCCGGATAATATTGTCAATTTGTCAGCCCATCAACTAATAAAAATCCCATTGACCACTCATTAGCCTTGATTTTCGACCACAAAATAACTTCTCCATCTTTGGCCCCTTGTTATAACCCTAGGCTACATGGGAATTTCTCTTGGATTCCCCTAATGTCCTTGTCTCAAGTTATCTCTAACATCGTCATAGGGTGAGACAATCACTTGTGTTTGTTTTCAACCCTCTCCATGGGGAAAATTTAGGCTTCGTTTGGGAACAGGTTAATTTAGTAATTTTTTAATTATTTGGTTAAAATATGAGCTAAAAAAATTAATATGTTTGGGATGACTTTTTGACTTTTTACGAAAAGATGTGCAAAAAGTAGAGAGAAAAGAGAATTTTTGACTTTTTAATATAGGTTATTAGTTTTTTGGTTAATTTAGTAATTTTTTGACTTTTTAACTAAAAAAAGGTTCTCAAACGAAGCCTTAGTATTAACATTTTCCAAAAAATACGTAAGTTTTTTAAATCGTAAAAAATAATATTTTAACATATACATAACAATAAACAAAACAGAGATAATAGATTAAACAAATATTTTTCTTTAGACTGTGATACAAGAAAGAAAGTGACAAGGAAGCATATGAAACGTAGCAAGATTAACAATCTAAAAACTTAGTGTTAATTGGGACTTATTAACATTAATGTAGGATCAAGTGGCT
>MSTRG.100455.1 Scaffold4160 1227837-1284992
GGCAGGGATCCATCCAACTCGCACAAACAAAACACAACTCACGCGCCACGACGTACACTACGCACCAGCCGCCCGAAACGAATCACCCCCCGAAGGACTAAGAAGCCCGACGAACGCGCGAAAACATTTAGAGAGGCCGAGCAAGCACCGGTTAGCGCGAATGCAAATAACAAACGCAACAGGCAACTTTCGAGGGACATACTTCTCGCAACAAGCTTCCACAAGGAAAGCACAGGCAACTCGTTCGCACGTCAAAGCCAACCAAATGGCAATTTAACTGAGGGACATGC
>MSTRG.69527.2 Scaffold2844 145218-146429
TGGCGATCACCTTTTATTGGGATTTGATTTGTTTATATCAAAGTGCTAGTAATGCCATGTCTTCATTCATAAAAAATTCTTTGGAGATATTTTATGATGATGGTTTGGTCATTCTTTATCTGTTACTCTGTTTCAGGTTGAACACTGACTTAATGAACTTTGTGAAGAATTGAGTGAACGTCTTCATTCTAACCTGGAGTAGAATAAGCAAATTGCACATACACTCACTTTGCATGCTAGAGCTTTCAAGGTAGTTACTTTTTCTTCTGATCCTCTCTTTCACATCTTAGATAAGCTTTCTGTTAACATTCATTCATGGCTCTGTTAACATTTGTTGTTATGCATAAGGGGTTTTGCCTAGTTCTACTCCATGATGTCTATTCCCATTTTTTTTATTTGTTACCTTCCCCAAGTTAGTATGTGAGATTTAGTTAACTAACTCCAAAATCCTATTTGTTCAGAATGATGAATAAATTACAGGCTCCTTTTATAGAGTATAGACCTTAATCTTGTTTGAGAATTTTCATCAGTGTTGGATATCACAGCTTTTATCTTATTTTTTAATTGACTTTATTGTATTTTTCTGGACAGATGATGATCATTATTCAGAATATGTCATTTCTAGCATTTGAATATCTAATGATTATGAGATGGATGGTCCCTTATTTTATTTAATTGCGCCTCGTGATCATGTTTATTCTATGTCCTAGGTATATGGCATATATTATGAACACTAATGATGAGGAGAAAGTTAAGGATTTTCATCCTTTCTCTATGGCTATAGACGGTGATAAGCTTTTGTGATCGTGGAACAACTAGGGCATGTTGCTCTTGTAACTGAACTTGTGAAGAGGTGGGTACGAGAGAAAGACAAAGTTGAAGTCGTCATAGAGTTCTAACTCATACAATGTTGAACTATTTTGATCTTATTTTGGGATTTAACTCATATAATGAACTATGTTGAAGTGAATTTGGATACTTAAAGTTTTGATTTTTGTAATTTGTTTTTTGTATATACATGAATAGATTTGATCTTGTGAGTTTTTTTTATCTTTCTTTCTTTCTTTCTTCTTTT
>MSTRG.86600.1 Scaffold3528 1203148-1203574
CCTCTTCCGTGGTGATCTATTTAGACCCCGTTTGGAATGGTGGTTTTTTAGTTCAGATCTCATATATTTAGGTCACATTATTTATCTATTTTTTTATACGTTTTTTTGTAATAAATTAAAAAAAAACAAATTATAAGTCATTCAAAACAATATTAAAATAATTAAAAAGTCAAAACACCCAATTATATCACTCTATCTATTTTTATGTCTTTTTGTAAAAAATTAAAAAATAAACTAAATAGTCACTTTCAAAACACCCTATAGGATATTGGCCTTGGTTATTGCTGAATTGCTTTATATATCACTAGAATTGGTGGCACACACC
>MSTRG.44992.1 Scaffold2067 715057-764302
GGCAATTGTTCTTGGGCCAGTTTTTCCAGGATTTTTTAATTAATAAATAATTATTAAGCATGAAAATAAGATTATGAAGAAAGGGATTTTAATCCTGTTTATTTACCATGTCAATTCTTCCTCCAATTACATAATCCAGGTGGCTAGTAATCACACCAAATATGCATTTTAGGTGCATGACATCATGAATACAAGTAAAATATATACTTTTTACTTGGAGCTTAAACCAAGTTATATAGAAGCCACATAAAGAATTTGCAATTAGGATATAAGTTGACATTTTAGGGAGGGGAAGGACAAAAAGTAATATTTACCATCCATAGCTTAGCTCACATTGGATACATATATCTTTCAACAATTTGTATGCTAAGTCAAATATCAATATTTATATATTCAAGAGTATCGGTATGGCGCAATGAATCTCATTCAATTGCGTCAAATATATAGAGGGTATTGCGTGATGGATCTCTTTCAATTGCGTCAAATATATAGAGAGATAGCGATATCTATATTCATTTTTTATTAGTATCAGTATCAATGGAAAGATTGACCTCCTTCATCAATATCTTCAATTGAGAGAGATAGATACCTATATTCAAGTATTTGTATCAATATCAGTGGATTTGCATCACACACACACAGAATGGTAAGAACATCCAAAAAAAGATTATAACAAATCAATAACCTAAAAGGTATAGTACACCCAAAGAAAGAATAACCCAACAATATGCTTGCAGAATCGCCAATGCAAGACCTTAAGGCCTTCCAAACAAAGCTACTTCTAAAAAT
>MSTRG.123401.1 Scaffold5946 355217-355912
GATGCTACTCCGAACAAGTTTGCCCCTTTAGTTCCATTTCTTTATTTTCAGTATTGTATTACTTTAAACATTTATTCTTTGCACATGTAAATAAATAGCCATCTCCTTTTGTCCACACCTTTAGTTCCATTTCGTTATTTTCAGTATTGTATTACTTTAAACATTTATTCTTTGCACATGTAAATAAATAGCCATCTCCTTTTGTCCACATAAGAAGTGTTGGCTCTCATACTCTCTTCAACATTCTAATGTTTCATTTATACATAACAAGAAGGATAAAATATATGCAGTAAAAAATAAGATTTTGCAAGTAAATCCATCTTTCAGTCTCATTGCCCTTCTTGGATCATTGAACTTAGAAGTTAACATGTTTAAAGACAAGTCAATAATGCTTTTCGTACTATGAAGATATCAAACCAAACACAATTTCAACGATTTAAACCACCACCACTCCCAAGAAAATGAAGTGCTCACATCAGTGATGGAGGTAACATGATTACTCAAAGGTAGTGATGTTAACTTTATTGATTTGTACCAAGTGGAGTACTGAAGACATTCTATTCTGT
>MSTRG.114807.1 Scaffold509 717982-718412
TTGGAAGTTGAAAACTCTCTCTTTTTCTTTGATATTGGTAATAAGTTCAAGTCTCTACTTGGAAACTTTGTTGATGCTTGTGAAAGATTCTTTGGAGCTCTAGAAGAACCACAGTTGTTTTCATTCATTGTTAATTGGGCTCGTTCTGGAAAAACAGTAACAATGGTGTTGTTGGCATTTTGCAACTCTGTAGATAAGTGGTCATATCGTTCAGCTAAGGCAC
>MSTRG.121196.1 Scaffold57 209711-212662
CCCAGAAAAGTAGCACAAGAAAGAAGAATAGAGAGTTGGTGGTTGGAGGGAGGGAGGAGGGAATTGGGAATTGGGAATGGGAGAGGCAGTGGTGTGCAGTACTTGTAGGAACTGGTCTCCTCATTGCTTTCCATATGTCTACTTATATATTTACAGGCTACAATGTGTGATACTATAACAAAAAGGGATTGTATACACAATACTTAATTTGATTGATGAGGCATGTGAAGCGAGAGAGAGAGAGAGAGAGAGAAAGAGAGAAACAAAAGATACGTATTCTGTTCAATAAAAATTTGTTGAATCAGTGGGTTAATATTGAAAAAACAAAAAATAAAAATGAAATTGCAATTTGGTTCTATATGGATAAAAGTATATCTGTATGTATTTTTGTATTTCTAACATGCGGTTGGCTTTGGAATTTTCGAAGGGCTGCAAAAAGAAGAAGACAACAAGGCTCCCTCACTCCCTCCTCATGGTTGTAGTCTGTCTGTACCACTCACACTCCACAATTGCATTGGATTCCAAATTCAACAAACACTCCTTTTTTTTTTCTTTCATTTTCTATGTTTTACAATAGTTAAAAGGGATATTGAAAACTAAGAAGCACGAACAACACAGGAACACGACACGGACACGTGAACACATAAATTTTCAAAAAATGCAGGACATAACAAGTTGGGAACACGTGCAAAATATATTTTTTTATGTATTTATTATGCCATATTTTTAAGTATTTAATATGTATTTTATGTCATATATTTAATTTTATCAAATTTATCAACTTTAAGTGTGTTGTTTTTATATAAATTTTTTTTTAAAAAAAAAATAGTCCCCAGTGTGTCTCTACATGTCTGTAGCTTGTCCCGAGTGTCCAACACGTGTCCAGAGCGTGCCTAACACGTGTCCATGTCTGACATGTGTCAAACACTCGTACGTGACCTCCGAAAAGGTGTCCGTGCTTCATAGATTGAAAATATTGGATATCACATGATGTGTTTATTCACCAAACCAACATTGTTCTCAATGTTTCTCCAGTGCACGCTTTTCATTCTCTTGAATAACAATTGTAATTTTGGAGGTTTATTTTTCAAGAACATATAAAATAAAATCAAGGATTAATTACACTTGTAACCTTTGTAGTTTGATTTAAATTTCACTTTAGTCCCTATAGTTTGTAATTGAACAATTTGGTCCCTACACTTTAAGTGTAGTTTCAATTTGGTATTTCCATCTAAATTTCTATTAATTTTCTCTTCATGTATACCTTAAAAAATTGACAAATGTCTCAAA
>MSTRG.130813.2 Scaffold662 387704-394530
GGGGAGGGAGAGAGAGAGCGAGATCTGCTAACTTGGAACTTGTCTTTGGCATCGTTGAGGCGTTCGCCGTACTCGTAGAGCTTTTCGACGTCCGGCGAATCATCGGAGGTTTCGGCCATTGAAGGTGAGAAAGAACAAAGAGGTTTGTGCAATATCGAACGATGACGAAAACGGAAAAAATGGGGGGAGGAAAGTAGGGTTTGGCGAAGAGGTTACAAGTTTGTTAGGGAAGAGAGAGAGAGAGAGAGAGAGAGAGCGCTCTGAGGTAAAGTTTTGAAGCGGAGACTGTAGACTGTTCTGTCTCAATCTACG
>MSTRG.55312.1 Scaffold2358 1007946-1010468
CGAGGCCCAATATCCTCGACATAAGGCTTTTTTGTGAACTGAAGGGTTTCTTGGGGTTTGTTCGCCATCTCTAATAGAAACTGAACACGATCAAATATAAATAAAAGGTATATACAGAGACAGAGAAAAAGACTCTTGAATCAAGCTGTGGGGTTTAAGGCTTCAAGCAAGCAGGTTTTGGATTGTGAAAAGTGTGCTCTCTCGGTGTGAAGGATACGCGCACAGAGAGAGAGAGGGTGAAGCCGCAGGAAACCAAAACAAAATATATTTGAAAAACCCTAAGCCCTTCTTGTTTCACTGACATAAAAGGGAGGATAGAGATGGTGTTTGGGAAGTGAGTTTTTATGTAGATTTTATTAGATGTAGGTTTTTATGAGATAAAAAATTTTTGGTGTTTGGGAAGATAGTTGGGTTTTTATGTGGTTGGATGTGATGTTTGTGAGAGAAAAAGTGAAATGATTATGGGGTTGGATGTGATATTTTGTTTGGATGTGTTTTTTTTGGTTTTGCAAAACTTTTGTCTTTTAGTGGAAAAAATGAGAAAAAAATTTGGGAACTTGCTTCCCAAACACCACCT
>MSTRG.28430.1 Scaffold1644 867779-869491
GATTTTTCTCAAGTTCTGGATTGGGCCTTCAATGGAGTCTCCCAGATAGATTTTAATGTTGTTTTGATGATGATGTTTGATGTTGATCATGGCCTTGATGTTGATGATGTCTACTAATAATGTTGATGATGGATCGATGTGGATCAGAACTAATGTTGATGATGTTGATCATAGCCCTGATGTTTATGATGTCTAGCATTGATTTGATGATGATTTCCTAGTTTGTTGATCTCTGCTTGGGTTTTTTCTTTGTAAAAAACACAAAATCATTACTGGATTCAGAGAGAGATGGCTAATGTTGGTGATGGCTAATGTTGTAAAAAACACAAAATCATTACTGGATGTTGATGATTAATATTGGTGATGTTCAATGGTTGATGATGTTTATTTAAAGTTTGATATTGTTGATGTTTTTTGATGATATTTTGTTGATATTTGATGTTGATGTTTGATGATATTTTTATGACGTTTTTTGATGAAATTTTTTTTAGTGATGTTGGTGATGTAGTTGACGATGTTTGATGATATTTTTATGATATTGATGATTTTTTATGATGTTTTATTTGTGATGTTGGTGATGTAGTTGAT
>MSTRG.102613.2 Scaffold4273 879001-879838
CATGCCTCTCACTCTCATCTCAGGTCTCTATATCGATGGTGTCTCTTTCTCTTCTCTTTCCCATCTCAGACTGAGTTCTCTCTCAGACTCTCACACTCTCATCCATCTCAGTTCAGATCGGTGTGCTACTGCTCGCCTCTCTCTCTCTCTCTCTCTCTCTCTCTCTCTCTCTCTCTCTCTCGGTGTTCTCATCTCTCATCTCTCTCTCACTCTCTCTCGGATCGGTGACTATTTTTGTTCATTTGTATGCTTGTGTGTTTTTATTAATTTGTTGCTTTGTGATATGGCTCATATCAGTGGTATTGTTGCTGCTCAGTTAAAGGTCAAGGTTTTGAAGTATTTTCAAATTTTAGAATATATAATTCTATTATATTTTGGAAGCTTCAACAGCAGAATGAAATGTAAGTTCTAAGCCACTTCTTTTCGAAAGATCTG
>MSTRG.154549.1 Scaffold980 258842-261626
AACCGTTTTAAAAATAATAACAATAAAAATTTTACAAGTCACAGGTATCCCCTTCCAATTTCTTTTTCTCAATATCAATCTTTCCAGTCAAGGCAAAACTTCCTTTGCTGCCTCTAATGATACAATTGTGAAATACTACTGTAAGTGTGTGGTAGGTAAAGTTGAGTGTGTTAGGTGAGAGTTGAGTGTGGCAGGTAGATGTAAGTGTGTTAGGTGAGAGTTGAGTGTGGTAGGTGAATATGTTTTTCTCTTCTATATATAGGAGAGTCATTGTATACACAACAATATATCAATCAATAATACATATATTTTTACAACTACATCCACAATTTGAAGGATCTTTATTAACATAGAAAAAAATGATGCAGGATGCATTTTATGTAGCCTGAGACTGAGTCATGCATTTTCAAAGGACCAAGTATGGTTATCTAGTCAGTGCTTGGATCACTATCCAGCCACATATTGAGCACATAATTTAGGTGTATAGCAATATCATAGATTATCAGATGAAAAAACACAATATATAATCAAAATATGTTAATAAAAATTCTTCGTTGCCAACCAAAAAATATATTGACATATAGCAATGCCAATTTTCCAATCTATACCCTACACATTTCTTTTTTCGTATAGAAATGAATTCTAGATGCAGAGCATAGAAAAACAATAAAGGAATGGCATTTCACCTAGAGCACAACTTGGGTAATTGCGTAATCATGTTTCAGTTCAACCATTTTAAGTCTTAAATTTGTGATTTTCATGAGCAACATCCTGCTAGACAATTGTCTTTATATTTTATTAGGTTTTTAATAGTTAAGGCTATTTCATTAATTTTTGAATTGGCAGATATGGGTCGTAGTTTTCATCCATGTGTTTTAATATTGCTAAGTTATGTTTCTAGGTACTATATGTGGGTTTTATTAGGTCAATGTTAACATCAATTAGTTAAAATTTCAGTTGATGCAAAGATGGCTCTTTGTACATCAGGGGCAAAAAAGGAATACAAAAAGGAAAAATTCACGCATCCCCAACACTCGAGCGTTGGTTGTGCAACTCTCAAGACTTCTAGAGCTCAAGCCCCCTGTCGAGCGTTACTCAAGCGCAACTTGCAGTAATTTGTGCGCTCAAGTGCCTATAGGGCAGGCCTCGTAGGAAAACCAAAGCTCTTGCCAAGCACCTGTTGAGCGAACCTAGCAAGAGTTTCAAAGCTCAAGAACCTATCGAGTGAACCTTCCAAGAGTGTCAGAACTCAAGTGCTTGACGAGCCCTGGTTAGGTAGGAACCAAAAACTTTTAAAAACTCAAATTTTTTTCCCTTGAAAACCCAAATTTCAAAGTCATATGATGGGTGGTGCCTAAATATAAGTGTGGAGTGTTGTGCAAGGGCTCATATAAACATATACCTGAGGGTAACAAAACCACGAACTTGCATCAACATCCTAGAAGGTTGATCACATTTTGAACTCCACCATACTCTTTCAATTACGAAGATACGAAGTCCAAATCCCCAGATTACAAATTCCAAAAGTTTTGTTCAACAGAAATAGCCAACCTAACTAAACCTATCCTAACAATAGCAATTCCAGAAGCTAGCCTACATCAAACAATGGGAGAGAGAGGGGAAGGGGCAATTAACACAACTATCAAGTTTGTGGCGTACAACACAAAAGTATGACAAACGTAATTTAATACTTAAGCCAAGATAATCTTGTTTTGTCATGGAACCACTAATTTGTTAGTTTCCAGCTGTTGAAACAAAACTTCTCAGATAAACTAATGCTCGCCACGCATTATTATAAATAATGATTAAGACATGAACTTGTCTTATAGTTAAAAATAAAGAACGAAGAAAATGACAATATTGATCACCTACAACACGATAACCTGTCCATCAATTAAGCAAACACTTTGCCGCATATGACAAGTTGTCAATCCAAAGAATCTCAAGGGGGTGGGAAACATGAAATAAAATTAATGTAAAATTCAACATTGCATGGAATCAGTTATGTCTTTTTATTTGATCCTATATACCAACGACAGAACACCTCCCTTTAAACCAGTTCCGAATTTTGAATCTGACAAGCTTGATTACAGTGAAAGTGCGGGAAACCACTGAAACTGACATTGTGTATATATATGTAATTTTTTATTTTTT
>MSTRG.116796.1 Scaffold5276 689952-693591
GTTAGCTGCTACAACGGTCCGACACGACCATACAATGTCTTCACCAACGGTCTGATTCGACCATACAATGTTTCTTATCTTATTTTATTTTATGTATTAGTTTATTTTCTTATTTTATTACTCTTTCCAAACTCAAGTTGGTTTGTGCCTATCCTCCTTAAGTTTGAGGGGGGCTGTTAGTGTTAATTTAGTGTAGTGATAATTTAGTGTATTATTCATAGCAACCAACTGTCCTCCCATTATGTACAGTCACGACCTATTAGCCTAGACATTTGTTAGTGTACACCACTTTAACTTTATGCTTTCGGTGCCTCGCATCCAATGTACATCACAGGCTATAAGAAGAGAGCTAAGCTCCCTTTGTAAATTAACAAAGTATATACACATCTCATTTATTCACTTGCTCTCTCTCTCTATCAATTTATCTTTCACATACCAAGATTTGAAGTTTTAAACAATCTTTTTCTACCTTTACCTGTTGAATAAGCAATAATATATATATCTATATATATATATTCTGAAAAGGGAATTCTAGACATGAAAACGAAACAGCGATTAGCGTTTGCTCGCAGTTACTAATGGATTTCGATTGATTTTCTTTTCTTTAGCTACTCTGATGTTTTAATTCGCTAATTTGACTATTCTTTCTCCCCTTTGTACAAAGCTTCTCTTTAGTTACTTTGATATTTTAATTCACTAAACTTGACTATTCTTTCTCCATCGTATAAAGACGTGGCAATAGCTTTTGGAGAGGAATAAATCCTTCTTTGCACAACTGTTGAAGAGAAGGATATATTTAGATTTAAATTTGTTAAGTGATTTGTGAAAGAAAAAGAAAATGAAAAAAATAAAGTGAGAAAATAAAAAGATAAACTTCTGATTTATTCACTTTTCCCACCTCTTTCCTTTTTCTTTTATTTCCTAAATCATTATCCCTAACATGACAGACAAAAATATGATTTTACAATTCAAACGACCTAAAGCATATAACCAGACACCCATCTTCTTCACTCATATCAAAATAATGAGTAACAAAAATGAGTGTTTAGTTGTACAGTTTAAATTATTTAAATTTTAAAATAACCACTTTGCCCATCAGACTAGACTCTAAGGGTAACTGATTTAGACAATTATCCCCAAACCTTAATATCTTTAGAAAATCACACAAGTTACATGTGCATATTATGGATGTGATTTACTAGCATGAAGATCTATGCTCTCTGTAACTTTGCAGGTAATGCACTTCTGAGCTTCTTATTGAACACTGCTCGAATAGCTGCTCCGACCAATGGCCAAGTTGATACGATGGCAATATAACCGAGCAACCACATAGATGTTCTATTTTGTCGAGAAAGGTGGTTTAAGCATCTTCTAATCGGATTAGTTATATCGAAAGAGAGGCCATCCTTGATTCCTCCGGCAGCTTGTTTGGATGTCTGGCCCGTGTTGGCCGTGTGACTGGGCTTTGCTTCAGTAA
>MSTRG.29422.1 Scaffold1671 2000387-2000840
CTCTAATTTCTAAAACAATGTTTATGGGTATGTATGTGTTATTTATGGAAATAGGAATCAAATAAAGGGTATGTAGTGGAAGAAGAGAAGGGTATTTAAAGAAGGAAAACAAAAGGGTAGACCTCGATTGATGTTGAGGACCACAAAAGAGCTTCTTAACTGTGGGAATCAGGTATAGAGAGAGAGAGAGAGAGAGAAGAGTGTTATATTGGGATCTGAGACACAAGACTTTCTGCACCAGTTCTGTGAAATTGCAGATTTTTACATATATAGAGAAAAAGAAGATGCTAGTATGCAGGCTAAAAACAGGTATGATATGAGAAGCTTTACAACTTATTGATTGCTTTGGTTTTGTTTGGTTTTGGGTCCTTGACAACAGAGTTCATGCAAAATAGAGAGAGAGAGAGAGAGCTATGGAATCATTACTATGAAG
>MSTRG.64365.1 Scaffold267 2373724-2376360
TGATGCTTAGTATTACTCTTCAATAGTTGTAAGAGGAATGGGTGAAACTATTAATCCAGTGATGCATGTCATGACTCGTGGATGGAGACTTCATGGGTTGCAATGGGTGAAACTGTTATTATAAACGTTATTGCTTAGAATGCAAATTCGTGATTACAATGATGATCATTGAAGTTCTCGTGTGAAAGATAAAAACAGTTTTACTGCCATGTCCACATCTATGGTTGTCATGCCATGCAAAATTTAGCCCTTTTTTTAAATTTTATTTTATGTATATAGCATTCTTCTTTTGAAAATTGGTTAAATTAGTTTGAATGGCTAGCCAAAGTGAAGAATCTTGTTTGAGTACACACTATATGCAAAATAGAGTGTTTTTACTTTTACTTTTGCTTGGCAAAATGGCTACCTATTAGTGTTGGAGATGCTGGTATAGTCGAGATCTGCACTCCACCTCCTTCTTCTCCTCCTCCTAGGGTCTCTCTCTCTCTCTGCCCTTATCTTGGTATTTCTTTTATTTTGTAATGATTGTTTAAACTTACTATTCACAACAATAAATGTACTAAATTTTTTTTGATTAATTTCTAGTCAATGTGTGATTTTGTTTGATAGTAGTGGACCTCTTAGTTTTAGGGTTTATTAATTTTTCCAATTAATCTGGGCATTTTGGGTTTGATGTTGTTGAGGTTGTATTTTTGGACCATTATGTGCCTAAACTGTGGAATATTTAGACTAATGCTTTCTATGTTTTTAGATATAGAGATATACATGCTCACTCATTTATGTATCTACAAGTGTTATGGATATGAATATTCTCACTTAAAATTGCTGAGTTTGTGATTGTATTAAATTAGTACTTGTATAATTCACGAGGACTGGTGTTTTGGTTAATCCTTCTATATGGAGATTTTAAATTTAAAGAACTACAGTGATGGAGAAGCATATATTGATTTTTTAAAATAGACTCTTGTATTATTAGACTTGAGTTTTGCTCAATATTTTTTATGGTATCTGGTATGGGTTTGATTTCTGGTGATGCTCTGTTGTTTGAAAAAGTAAATTTTGAAACAGTTATTGGAAATATATACTTGTTGCATGCTTAAATAAAAAGCTTATGCACTTGTCAATGATGCTAAAGAATGGCAGAACGTGGATCCTTTTCAATTTGTGCTTATTTCATTTATTGAAAAAAAACCACCCAAGAGTTGAGTTTTAGTCGGTAAGAGTGTGGCTTTTTTAGATTGTAAGCTTGTTGTGCAAATACATAAACTAAATGCTATCATGTGCTACTTGAAGCTAAGCAAGGTTTGTGTCCACCATACTTGTTGGACACAAACACAACTGCTGCACTTTGACGTTGTGACATTGCTTTCATTTAGTAGAAAGAAAAGTACCTAGTATAGAAACATTGAAAGAGGGTTTCCGTAAAAAAATGTAAAAAAGTTGGATATAATATATATTTAAAATTAATTCCCATGACACAATGCAGGTTTTGTTCAAAGAAGTGGGGTTGTGAATTAGGGAGAAGTGATAATGATTACTCCCTATTGAGTATATAGCCCTATACATATTCTTGCATACAAAACATATGCTGTTTCATTGATCTGTGTTTTGCAAATGCATTATTTCAAACTTGTGGTTTCTTGCCCGGTGTTGTCTATGCAACATAGCTCCAGCTTGTTAACTTGGAATCTGGTGTCCCATGTAATAACTTAGGCATGCAACATTGTTTTGAAGAACTGTGGTATTGTTATTGACACAGACCTGAAATAGTGTAATGTTTGAAAAAGTTACCTGGTGTTGTCTAAGTAATTTTAAACTAATAGTATTACAAAATTCTAGAGGACTTTTAGAGTGACAATTCCCCTGAACTAGGCTGCATGTCCTTATTTGTTGCTAAGGTTTGCTAAGTTTTTAGGGACATAATCTAAAATATTTCGCTCTCAATGATAAGTAGTCCCATTTAACTGCATGATGCACTTCTTTGCTGATGTTGTTTTCGTTGATCAATAGAAACTTAGACTAGAGGGTGGATTTACGTTGGGGCAAGTCAGGGCAATTGCTCCCATTGAGTTTGGAAAACTTCACTTTTATTCACAGTTTTAGAATTTATTTCTAAAATTGCCCCAATGATATTTTAAAATTGCTCGCACTGAATTTTAAGAACTTTTTTCACCCATGGTTTTAGGATTTGTTTATTGATTTTTCATTAAATTTTAAAATTATTTTTTTTACCTTTGATTTTAATTATTTTTTCAATTTTCTTCTTTGATACTTTATTTAACCTCCCCACTTATTTTAGGGAGGTGATATTTGC
>MSTRG.98058.1 Scaffold409 1588348-1589580
TCCCTTATATATGTTGCAACATTTATGAGATCAATTGGATATTTTTATTATCACCCAACTTTAAAATGAACAAAACATATTATCGTGACCTTAAAAAGCCCAATAGGTCCAATTGAATTGTCTGCTCGAGATAATCCAATCCCCTAATTATATTTAAGGTCGTTCTCCTCTGTTCGATTATCCAGTCCACTGGAGAAATGGCAAATTCATATATATATTGAATCCGTACGTACATGAAATGTATGTGCATGTATGTATTATGTATAGGTGAAAATGTTTACTAATGAATACAAAAAGGTTTTGGGGGACTCACGAGGAAATTTGCAAAGAATTTTCTTGATCTTCTTGTAGCAGCTAGAGCACTGAAGATCAACCTTCAACACCATTGTTAGGCCTTATGTATGTTAATCGAATTGGGTTGAGAAGTCAAAACTGAGTCTGGATCCTCTGCTGCCGCCTTTCTCTGCTGACCGACATCATTTTGGGGCAAAATTTAAATAATAAAAAAAAAAAAAAATCAACAGAATCAGAAATCAAAGAAGAGAAAGAGGGGAAGAAGAGCCAAGCACATAGGAGGAGAGAGAGAGAGAGGAGAAAAACACCTCTTCAAACCCAAAACAAGAAAAAAGTTAGAAACGTGAAAAGGTGTTCTTCTTTTTGAAGCCCAAAACAAGAAAAAAGTTAGAAACCTGAATGCATCCTCTGTTCTTCTTCCTTTCATTTCTGTTGATTTGCAGAGAAACAAAAGGTACCTAGAAGCCAAAACCGGCTTATTTTGAATGA
>MSTRG.64456.2 Scaffold2673 8236-9495
TTTTAATTAAGTAGGATGTTCCAAGAGCTGGAGTAAAAGAAAATTTATTTAAGTGAAGCACATTGAATCTGAGGGTAATGTCGATTCCCTCATTAGCTTTGTACAGGCTGGAAACTTGAAGGGGAAAATAACCAGGTACAGTTGAAAATATAAATGCTGAATTTTTTTTCCTTATTGTCATAAATGTATCAACTTGTGTCTTGTATTTAGCCTATCATTTTTGTGCATTAGTGTTTCTCTTAATTCTAGAGTTTCCATATAAAATGAGCCTTCACTAGCCTTCACTGGATTGTTCTTTGAGGAAAACGGCCCCATTAAGCTTGTAGTGGACAAGTATAACATAAGTGGTGACTGGTTGCCATGTGTCAAAATATTAGTTGTTGGACTTCGATGACTGGAAGGATAAGTTTGTGGTATCATGTAGAGGAGTATGTTCCAGGTATCTCAATTGTATGAGGTCTCTTGTCCATTAAGCTAGTAATGTCATCAATTAGCACTAGGTGTATTGTGGTTTAGACCATATAGCATCAATGGTGCCTGTTCCTTAAACTGTGATTCCTACTATTTTCATAAATTCAAGCCATTGCAAGAGACCTGAACCCCAAGCTTTAGAGCTTGTTGGAGCAATAATTGTGCCTTCAAGCTGAAAAGTGAAAATACATGATTGATATGCCTCAGAAACCATACTAGTTTTAGAGTCACATTTTTAGGGATTTCTAAACAGCTCTAAACCAGACTAATGGGCTTTTGGGGATTATTTTTTAATAAGGAGTCAGTCCTAGTCCTGGTAATGGTAGCTAAACTTTGATTGCCTAATCATTTTAATGTTTTTGATAAAAATTTGTGTTATCCCTTTGGTTGGTTGTAGGTCAACCGCATTCTTCAAGATGTTCAATTTAAAGACCAGAAGCAGTTTAAGCAGTTTGTTTCCCAAAGCAAGGCTAGAATGGAGGAGTGATTAAGAGGCAGTGGTGATGATATTGCTGCCGCAAGGATGGGTGCAAAGTTAAATGTTGCAGGGTGGATTTCTAAACAAATGGGTGGCGTTAGGTTAGCTATCTGGACTGTTATCTATTGATTTAAATTGCTTGTTTTCACAATACAGTCGTGCAACCACCTTAAGTCTCAAGTCTGCAGTTAAATTCTGTTTTGGTTTTTGTTGTTTTTA
>MSTRG.138749.1 Scaffold7573 243672-243920
CTCTCTCTCGACCATACCATGACTCACACATCTCTCTCTCTCTTGATCTCTTTTCATAAGGACATTTTTCTCGAGGCACAAATTAACAACGGCAGCTTCGAACCAACCACTGTCGCCACCATCATCCATCATCCTTCTCCACATTTGCCACGTCGATGGTGCCGCCGCTGCCTGTCCTCAACCGCAAGACCCAGATGCAAATCCACCA
>MSTRG.41476.1 Scaffold1959 225063-225605
GGCTTAATGTAAAGAAATTCATGGCACGAGAGATATTCACCACTATTCCCACTACCAGGACATAGCATGAATAATAATGCTTTTTCAGAATAGTAATGCTGGTTTAAGAATTGACAACAGTACTAGATAATGTAAAGCAACTCCTGATCCATTCAATTGTTACAAGTTTTCAACAACCATAAATGCAACACCTCACCATCTATGGTCGGACAGATCATACAACGAAACCATTTTTTTTTTTTTTGGGAGGTCTTATGCACTAGGCTTCAAGGAGATGAGCAATCAAAGAAGAGTTATTAATTATTACCTAGACTAATCTCTTAAAAAGATAGCAACCAAGTAATTCAGACAAAGATCATCCGGTTCTGGATCCAGTAGACGTAGAAAAATCACATTTTGTGGAAAAGAGAACATTTGAAGTTTGAACTAGTAGCAAAACATAAGTGAAATGCAAACAATGAAGATGCACTCAAGGGATAATCATAATGTTT
>MSTRG.65490.2 Scaffold271 1903298-1915873
TGAGAGCCTGATAAAGAATCGCGTAAGGGGAGAGAGCGTCCCTTCGGGGACATCCGATAAAATTGGAACGATACAGAGAAGATTAGCATGGTCCCTGCGCAAGGATGACACGCACAAATCGAGAAATGGTTCAATTTTTTTTTATTTTTTTGCCCTCATTCTCATACGTTAATTTACGGATATGCCCCTCTCAGATTCGAACCATTCCTGGACCAGCAAGACCGTCAGGGAAAGTATCGGATGGGAAGTTTTGTGATTTCTGGTTCGATTTAATCATCATTGCCTTTGGATTCAAGTATTTGATGAGAAGATCTGTAGTTATGGTTTCTGGGTTTTTGGTGAGGTTTGATTGTCTGGTTTCGGTGGTGTCAGTTTAAGGATTCTGGCTTTATGTGCAATACCGTGTTTGATTAGCAAATTCAACAAGGATCCCAGCGTGTGGAGCTTGTAAAGAACACTTTCCTCTTTGGAATCCAATGAAATCAGGGCCCCAACCCCTGATCTGCCTCGCTCACCGTCGCCACCACTAGTGCGGGATAGGAATTGTGGCAGTTGGGATGATTGGAGGTGGCAGAGACTGGTGGTAATGGTGGTGTGAAGAATGAATGAGATTAGGGCATTTTTGGTATAATAAGTTGTGTATTGAGTAAAAAGTGAGATTTCAAATTTATGAAGTGTGTGCTTTGAGAAATGATGTACAGAAAGAGGATGTGATGTATGGAAATAGAATTTCTCAAACCCTAACATAACTCAATAAATACCCCCCTTCTCTCTCTCTCTCTCTCTCTCTCCGCCTTTGTAACTATTCCTCTGAAACAACCTCTCAGATCTACGTCATCCGCCAGAGCATCATCGCCAAAGAAGTACGTCGACGAACAGTCCAAGAAGGAGATCAATGATATTCTTGTTACGTATGATCGTACTCTCTTCGTCGCGGTGCTCGTGCTAGGTTCTAGAAATCCTACTGTTAAGAGCGATTTCATCAGTATGCTTCTTCTATTATTAATCTGTTTTGGTTTATGTTTGGAATTGTGTTTTTGAGAGATTTTTGCTAATGATTGTTATATGCATTTCAGTTGATTGAAACTTCGATGTTAGGAGTTTTGAATTTGAATATGAACTGCTTTAGTTGTTTTTATGTCTTTA
>MSTRG.54295.2 Scaffold2323 697767-698221
GGAAAAGGCATTAGTTTTGGCAAGAAAAAGAAAAAAATTTCGTCAGGCTGTACAAATACCTCCAAACGTGCTCCCATATTTAATGTCACAATGTGGTAACGTACCCAATTCAATGCCTTGGATATGGAATGGAATGCCTCAATATACCAATTTCCAAGCATTATGTCAAGGACCTTTTGTTAATTATGTGATTCAGCCATCCCAACGCTCAGTTAGCACACATTGTAGTCAGGTATGTAATATGAATCATAGTTTATAATCTTTATTTATGTACTTGTTAACATCTTCTTTTGTTGGTACTTGTCAAAGGTTGTCAATCTAAATATTGGTGATAATCGGCATACACCTGCAAATTCTGAACACCTCGGAGACAAG
>MSTRG.53068.1 Scaffold2290 509360-511956
TCAATAGATATGGATAGATGGATAGATTGATATATATGTGGTTATATATCAGATTATATGGTTAATCTATGAGATACATATATCAGATATATGTTATGTGATTTTTTACCCATAACCATTTTTCCCATACTCTCTCTCTCTCTGACTCTCTCCTATAAAACAACAATCAAGTCATTTTGCACTGTGACTTGTGTGGGTGATACTCATTTTGTAGTATCACTCCACTGCTGGGTTCGTTGTTCAGATTTTGGAAGTACGTAATTTACCCACGAGGTTCTTCGCTACAAGGTATGATTCTGATATTTTTTCCCGTTGTAATATAATACTTTGATTTACAGTTCCTAAAAGTGCACATATACATGGGTGCCGATTCCCACCGACGAAATATCCGTAAAATGGCAATAGTAGCGCTTGTATAGGCTACTTTTACATAGGTGTCGTTTGACGGTTTCCTGCGGACGAAATATCTGTGAAAGATCATACTGGTTTGAGATTTCTCCCTTGTTTTCTATTGTAAAGGACATGACTTGAGAATTGTGATATAAACTGAGCATGGTATGGTTTTTGGGAAAGAATTGTAAAACGTTTTGATATGAGCATTGAATATGCATTTCACCCTTATAACTTTATTAAGATTCATATATTGTGTTGGATTATTTCTACTGAGTTTTGACTCACCCTATATGGGAAAACTATTTTTAGATATTGGTGAGATACCTCCGCCAAGGCAGTAGCTTGGAAGGAGCTAGAGCTTTATTTTGCGTGTTTGTTGTAATTATTTTAGACAAGCCTAAGGTTTTATCTGTATTGGATTTAAATTCATTTTGACGTAACCAAGTATAGTCTTGGAAAGTTGTAACCTTCAGGGTATTTCTATTATCTGTTAAACTTCTATTTCATATCTTTGTTGTTGACACATGCTATAGATTCAATGTTAGGACTTATGAATATATATTCGCATGTGTCACCCTTTTGTACAACTGAGCCTTACGTAATGGAAGGATATTATATTCTGATTCATATTGTTATTTACTTATCATCGTGGATAGTTTATTGTATTTATTTCAGAGTATTACAAAAGATGTCATGTTAAAGAGTAAGAAATATTTGTAAACATTGTTAGTTTATGTATCATTACTCATATTATACATTTATTTTAGTAAGTAAAGAAATTACTAAAAAAAAATTGTTTATATAATATTACTTTTTTTAAATTACAATTTTAGACATTCTTTCTTAATGGGTGGAGCTTTTTTTTTCTTAACAAAACAATGATAAAATTATATAAGCCTTAATTATAATTTTCAAAAATTTGGGACCTTGGTTATATTTGTGGCCTAAAGCATTGGCTTAATGGTTTAAGGGTTAAGCCGGCTCCGTAAATCGGATATTTAACTAGATCGGATCGAATTTATTCAAAGCAACCTGTTAACAATCGGACTAATTGGTTCAGGTTTAGTCAAATTATCAGATCGGATCGGATTCAAGTCAAATCTAATCCGTTGACAGTCCTATTTTAAACTGTAGGGTTTAGGATTTATGTTTCACTTTCTCAATGGCAGAAGTGCTTCTCTTTGCCTCATAAGCAGAAGGAGAAGAAAGATATCAGTGGTTCTACATTCATGGATGTTTCTCCTTCAGGGGAAGGGCCACTAATAATGAAGTGCTTAAACGTGATGTAGTGTATGTATCGCTAAAATTACACTGCCTAATAGGCTCTCAACCTCCCGCTTTTGGGCTACGGGTAGATAGTTATTAGGGAGTTCCTGACCTCTGAACTACCTACGTTAGGTCAGTCGCTTACTCCCTATTAGCACAACTATATGAGAAATAAAACTGAACAAAAAATCAGAAGCAAATTATGTTATAACGCTCAAACCCAATCTCATTAAGATAGATTCAAAGAGGGATATCACAAAAAAATATTGTATTTTGTATAACTAACTTATTTTCATAAAAACCATAAACAAAATATGTATTTATATAAACCAAAT
>MSTRG.68680.1 Scaffold2819 537790-538196
ACATTCAAATCTTCCTCAAATTCACAACAACAATTACAAGTCAAATTCCAAATCATCAAAACGCATTAACAATACATTGACAATAAATTTTCCCATTTTTTATAGTGTCAATTTAATCCAATTGATAAATCAGAAATTGGACATAAATAAATGACAAAAATGGTCCATTTAAAGGCAGAGTGGACAGTTTCAAATTGGAAGCCAATCTCTCAATCCCTTTGAGGAGAGTGAATAAACTATTTCGCCTCTTGATCTCACTCCAATTTCTAAAAGAGCTTTATTAATTGGACTACAATGACCAAATTAACACGAGGCAAATAACATGAACTAACTAACCATTGATGAAGAAGGTTGCTGCTGAAATTGCTGTGTCC
>MSTRG.71000.1 Scaffold2902 696554-831030
CAAGTGCTCTAAGTTTGGCAATACTGCACTGTCCACTGCACCCACTATGGTTTCAATTTCATCACAACTTTCAATTAGACAACCTCGGACCTTGTTCATGCTTGCAATTCCAAAGTCGGACAGCTGCTTGATGTCTTTGTGGTTCACTAATTCAAATCCATCAGCTTCAGCAAGGACTCTGAGAATTGGAGAATTGCTACCCACACTATTGGAGTATTTGAC
>MSTRG.38099.2 Scaffold1858 1462985-1526178
GATACAAAATTGCACCTACAAACAACGGTCTTCTCTGTGGGTCGTCGTCTCCGTCAACTGGATGAGAGAGGAGAGAGAACCATACCATGGAAGCTCTGCTTAGGCTTCTTCGAGTAGCTCTAGTTGTCTCAGTCGTGGCTCACTTCTCTCTCCTCGCCAAATCTTCTTCTTTCTCCTCGCAGGAGTTTCAGATCGTCAATGTCGAAAGCAGAAATTGGAAATAAAGCCGCGGTATGCCTTTATTTGGGGGGTCACTGGATATGGAATACCGTTGCAAGACTTCCTTTTTTGAGTCATCTCATGTAGCCCCCTCACTTCACTTCAGCTTTTGGATATCCTCTTGTTGAGGCAGTGGCAGACGAGTTGACCATGAAAGTGGGTGGTTCTGCCAGAGAGATCAAAACACCCTTCTGCTGTGGTTCCTTTTCCACTACAATATCTAGAGGTAGTTGTTATGGCATATCACTTTTGTCATCTTCAGAGACATTTGAAATAAATTTTATTATGTATGGATGTGTACTGTGTTCCTTCCCTTGATGTTGTTTTACTCATATTCCAAAACACCTGATTCATTTGATTGTGGCAACGAAATTTCATGAGTACAGACTAGTTGTTCATATCTTGATGTCATTGGAAACATTATAGCAGCGTTGGTTCCTGGACACAAAGTCTCCTTTCCAGAGACACTGATGGTGGGTTCTAATCACAAGTAACATAGAAGAAAAAGAGGGAGAAGAAAGACAGTGACTTGGTTAGAAG
>MSTRG.33958.6 Scaffold1775 405605-419069
AAAAAAGAAGATTTTTTGCCTTTTTAAAAATGAAATCCCCAATAAAACATGTGATTAAGGAATAACTTCTAAGAAAAAGAAGCTTTCCGACTTAAGTAGAGCCTTGGAGGTTATGGAAGGTGTTGGATTGAATAAGAATCTTCAGGTCATTAACTTTAGGGGGAATTTCAACTTTTATGAAAAATGCTAGATAAGGAAGTGGTGATCAAATCTTCCATTTTGAATAAAACTCCAAATCCCCGAAAAGACAATTGACTAAGGAGACAATTGTTTGATTTGATACTTGGAATAAAATCCAAAGCTCCTTGGGAGGGAAGAATTTTGAAAGAAAACTCGAGTAGAATTTTAGAAATTACAAAAAATTTTTAATCAGACAGAAATCTTTAGGTTTTTTGACTTTAGAGGGAATTTGATTTTATGGAAAAGTGTTAGATGAGGAGGTAATGACCAAGTCTTTCAATTTGAAATGAAATTTTGAATTTCCTTAGAAGACATTTGACTATAAGATAATTGTTTGATTGATTTCTTGGAATAAGATCTTAAATTCCTTTGAAATTTTTTAAAAATAAATATTTAGTTGAGTTCAAAAATTATGGAAAGTTCTTTTCATCGAGCAAAAATGCTTGGGCCACTGACTTTGAGGGAATCTTAATTTTATGGAGAAATGTTAGGCAAGGAAGTGATGACCAAGTCCCTCATTTTGAATAAAATTGTGGTTCTTGTATAAGATATTTGGCTAAAGGATGATTGTTTGGTTGATTCCTTGGAATAAAATCCGAACTCAAAACATTTGAAAAAAAAGAGGAAAGGAAAACTTTGAAAATTTAAATTAAATAAGGCACTTGTTTTTGAAAAAGGATTTTGAAAAAAAATTGAAGTTGAAATTTGATCATCCACTTTTGAAAGTAATTTGGGGCACATTTCAGGAAACAGTAAATAATGGAAAGACAATTGTTTGGATTGATCACTCTGGTAGGAATCATTAAAATTCCTCAAAATTGCCTTGGTTGGGCAACTATCACCCAATGGGTGATGACGATGACTTCGAGATCCGACGGTAATTGTTAAACCAAATTGACTGGGTCCACTGTCCTCAGGCTTGCTGCATAATGTCCAGGACACTGTTCGTGGGTTATGTTATGCCAACAAGGCAAGCATCGGATTGTGCTGCTAGTACTGTTTGATCATTCCCTTGTGGAAGGAGTGGTATATTGATAGTAATAGCTGATGTACCTTTTTGTGACTAAACTTACCTTTGCATGTAGAGAGCATTAGCACTTTCCAAACTGGGGCGAGATACCCTCCTTTCTAGAATCGTATCATTGTGTCTTTGAATGATCTAGTGAATCGTAAATCTCATTTCTAAATTAGGACACGGCAACCCTATCCCCCGATAAGCATGCATCCAAATTATGTGCTTATGTGATATTTTTAAACTGATCTGATTTGTTTCCAGGGATCAACTATCAGAAAGACAGTGATTTCTTTACCAAATCTGGGGAGTCTGATGTGGCAGTGATTTTATTCTGTTGCAGTCTGAGTTATTTGGGGCACTGATCCAATAACATAGATTTGGGGGTTCAAGTTAGGCTGTGATTCGTATTTTGATAATGATTTGAGTAATCAGTAGTAAATTAGGCGTTGGGGGGAGGGGGGGGGTTGTTTCCCAATTTTAAAGAATTTGAGTTTGAATTTGGGTCCTTACCTTAGTGATCAAAAAAGATGAATTTTCGCCTTTTTAAAATTGAAATCCCCAATAAAACATGTGATTACGGAATAACTTCTAAGAAAAAGAAACTTTCCGACTAAAGTAGAGCCGTGGAAGTTATGGAAGGTGTTTGATTGACTAAGAATCTTCAGGTCATTGACTTTAAGGGGTATTTCAACTTTTATGAAAAATGGTAGATAAGGAAGTGGTGACCAAATCTTCCATTTTGAATAAAATTCCAAATCTCCAAAAAGACAATTGACTAAGGAGACAAATTTTTGATTAGTTACTAGGAATAATATCCGAAGCTCCTTGAG
>MSTRG.108721.5 Scaffold463 1289252-1295491
CGTCTGCCCTTCGATTCTCTCTCTCGCTTTTGTCTCCATCGCCGTCAATACAGGAGCACCATTGGCGCCGAAGCTCGTCGCACACGAGGACCATCACAAACCAGCAGCCTATATCGTCTTATCTCGGAGTCACGATCCATCATTGGAGCACTACCCTAGGTATGTCCTCTCTCTCTCTCTCTCTCTCTCTCTCTCTATATATATATATATATATCTGTATCTCAGACTTTGTTCCCCTAATTTCGGCCTCTAGGGTTTTTTTCTTCTTCCATCCGCATACCTTCTTCACGCAAACCTACCCCGAAATCGACCCAGCCACCGCCATTCATATAGTGGGCAAATGGTTTCTTCAACTCTTCCCGTCTCCACCTCCATATCTGCGAAATCCATTTTTGAAACCCTTCTTCAAACCTTCCTTTCCTAGATAATCGAAAACACCAAGTGTTTATTTTAAATGTGGAATAAAAAGCATGATCTGAGATTAAACATTTTGATTTTAATTGCCTTGTATTTGTATGAAGTTGGGTTTGCTCTGAAATGTCCACAAATAGACCATTTCGTAAAAAAGAAGAAGATCAAAATTGTCAAGTTAAGTTCTGAAATAGTAGCATCTATCAACTGTTCATGGCTTTAGAGTATAAATTTTTACCCAATAAAAACAATTCAGACTTTAAGAGCCAAAATATTTGCGTAATGCTATTTTGTATCTCGTAGGCCAATCTAGAACCTTCTTGTTCGTCGACTTCCATTGGCACATGAGCTGAATTATGAGAGGGGCAATTGTTGAGCAATCCAAGTTAAGAAGACTGAGGATGTTGATAAGGATAAGAAGAAGAAGCGTTAATCCAATCCACGATCCAAACAAAATTCCTCTGTTTCAGCATTTCTGACTGCAGCAGGTGCATATAATAAAAGGCCCCCAAATATTCAGTCTAGTTGCCGTGTTGACCGCTCTGGGATCCTTGAAGGCGCTTCTTGTTTTATACAGGTTGCTTTTGCGTGGGTTATTGTGAATATTTATTGTTGTGTACGAAGAGCATTTGTTCTGTGTATGGAAGACATTTATTTTTGTACAATCGTCTGTTTTGAAAATCTAGTGTTTTTGTATGTAATATTTAATTTAGATAAATTATACTT
>MSTRG.22753.1 Scaffold1504 1002846-1003462
CTCTCTCTCTCTCTCTCTTCCCATTGTATATCCCAATTATCTAATCTTACACATGAATTTACTCATTTCCGATCCTTGGGAAGAAAAAAAATAACTTAATTTAGGCTAAAATTCACAAAAAGACAAAATATACTAAAATAGCTAATAAGACAAAATATCACATCAAACCCATAATCATTTCACTTTTTCTCTCACAAACATCACATCCAACCATAAAAAATCCAATCATCTTCCCAACAAAAATTTTAGCCTACTAAAATAACTAAAAACTAAAATAGCCTACTAAAATAGCAACTTCCCAAACGAAGCCAAGGTCTCCATTTAGTTTTCTACTGCCAATTCTAAAAGGGCCTCCACCAAACAAAACTTACATACATGTAAAGGGCACTGACTAAAAAAAAATGTATCAGTTCAACCCTAACTTCAAAACATGATTCTATTCTTATTTCATCTCAATTTCCCTTAAGAAAATCATACATAGAAAATCTGCCCCACGTTCAAGAGACTTTCATGAGGAACATTGAAAATGACACTATTTTCCCTGCAAATCTT
>MSTRG.103069.2 Scaffold4295 771729-792853
ACATATTAGACATACAAGAAAAAAAAATCAAAATACACAACTGTTCGGGTTCTAAGACTTCTAATCATAAAGGAACATAGAAATCGTGCAGAGAGACGTTTTGAGGTCGAAAGAGAGGGAGAAGAGAGAGGGTTCGAAGACAAATTTTAGGCACTTCGATCTGGAAGAGTTTCAATCTCTCTCTTTGGAGACTTCGACCTGGTTCGGAGGCGACAACAATCGACAATACAATCTCATCTTTTCTCTTCTCTTCTCTTCTCTCCTCTCTGCGTTTCTTTGCTTTTGGTTTGGTTTTGGTTCGTCGTCTTCAACTTGATTCGTTTGCTTAATTTGATCTCCATGGTTTTCACAAAG
>MSTRG.57282.1 Scaffold2417 1147780-1157983
AGTGACGTGTAGTTTTCATATTGGTTCAGGGCACTAGTTGGACTTTCATACTCTATTCGAGGATTATATTATTTCGTTTCCAGGTGAGTAGTTTCATGCTACATATTTTTATAAATGTTCCCCTACCCTGAACTGTTGGAAAAATTAAATTGTTGTTTCATGATTAAACTGTTTTGATAAATTATTATATTATCAATTGAATCAAATTATTTCTGAAACATGTGTGAACTTGGCATACTGTAAACTATTTGTTTTGGTCTCATGTTTATAATGATGAACTACCATGTTTTGCGAAACTGATGTGTATTGATTATTGGGACCATGTGTGTATTTAGTCCAGGGAAATTATTCCACTGTGTGTGGTGACTCTGGCCACTAGGAAACAGATCCGGGTTGGGCCGTGATGACTCTAGTGCTCAACGATTGTAAGGAAAAGACCTTTAAAAACAACTAGGTGACCTTCAATCGGATCGTCTTTGAGAAAAGGCCCCGGTGCCACCCTG
>MSTRG.21387.1 Scaffold14782 132380-132744
TCTGAGATTAACCAATTCTTCTATACCTTGGGGTACTTCTTCAATCTGACTATGAGTCAGCACAAAACATTCCAACGCCTTCAGTTTCTCCAGTGACGGCACATATTTTAGGTTGCGATTCTCGCAGAGTGTAAGCCCTCTGAGATTAACCAATTCTTCTATACCTTGGGGTGCTTCTTCAATCTGACTCTGACCTAGTTCAAAATGTTCCAACGCCTTCAGTTTCT
>MSTRG.41724.2 Scaffold1968 532713-535682
ATTATCCTCATAGTCATCTCTATATCTCTCCTAAATTCCTCCAAAATTCAGCCGGAGCTCCAAAGCTTCTGCTTACTAAAACCAGACTCTCACTTTCACAACCAAATTAGCAAACATTTTCAGAGGGACAAAGCTCATCAATGATCGTCTTTTCATCTCAGACTCTCTCTGTCACTGCTATTTCAGTTCTCTCTTCGGTAATTTCACTATTGATTCTGTGTTTTTTTGTTGTTTTGATCTCAATCTCTACTTATTTTCACAAGTATAGATTGATTAGGTCGTATTTTTCAATATCAGCATTATCTTCAATTCTTGATTCCTTCAATTCCGTCTCCAATTTTATTTCAATGTTCTTAATTCACTCTCTCTCTCTCTCGCTCTCTCTTAATCAAGAATTGATTCCGAGCCACAGTGATGTTAGTTACACGAGCACCAATCGATTGATTCCGAGCTTGGAGTTCGATTCTGATTCTGAGCCCCTTCCACGGATTTGATTTCTTTGGGGGTAGCACAATGCTATTCTTTGCAGGAAGCAGTTGTTGCTGATCAACTATTTCAAAGTGCTGAACATTCTTCAGATGATCTTCTTGTCTTCTTTAGTGAAGAACTAAGGGACTTATTAGAGAGCCAGTTGAATTAGAAATTAGTGAATTTTATCATTTGGATACTTTTTGGATGTTTACAGTCGTATTTTAGAGATTAGTGAATCTTATGATTTGGATTTTTGTTTAGTTTGTATGTTTGAGGTTGTTATCAGCTTGATATGATAGAAGTTGAGGATGAAAGTTAGTATGCAGGTTATTTGGTGTATGGATATTAAATTTTTTTTGCTTGCTTCATAGTTGCTGCTCTTGC
>MSTRG.76723.1 Scaffold3113 977769-978626
AACATACGTAAACTTGTGAACATTCATTAAGTCATAACGTAACATATCATAACTAGAGCATTTCTTGATTATTTAGAGTTGTTGGCCTTTAGCTCTTACATGTATTGGCATTAAACTTATTGGCATTTAGCCCAAACATTATCATAGCAAACTTATTTCAGAGTCTTACAAAATTCCAGAATCATAGAAGGGTTGTTTCATTCTTTCTCTTACTTATGTACCTTCCTTGAATCATTTACATAAACATATAACATTTATCTTCCTTGAACCATTTATATACATATGACATTTATCTTCCTTGAATCATTTACATACATATGACATTTATCTTCCTTGAATCCTTTACATACATAAGTAACGAAATTAACAGAATACTAATGACAAGCATTAGCGGTGGTAAAGCGTACTACTACTCACAGTGTTTAGATGCTAGGTCCGTCCCTGCAAATAACCCTACACAATTCAATTCAACAACATTTAACACAATTCGACATAATCGACATAACCCCACATAATTATCACTATCCAAGATAATCCACACTATTTAACATTATTCAACTCAATACTACCAAATATAATTCCACATAATTCAAATTAAATTGCTAAGACTCAATTCAATATTCCGTAGCCAAGTTTACATCATCCACATCATCAACAAACCCTTCCCCCCAATCTCCTTTCTCATTAAGACATGATTCACAGTGCTCATAACAAAGTT
>MSTRG.48198.1 Scaffold2148 820276-821001
CCCATAACAAATTCTTAGATCAAAATCAAAGAAATCTTATATGAGATTATACAAATGTGTCACACCAGAAATTAAAAAAACACAAACAACATTAAACATAAACTGAAATTTTTGAAGTGAAATAAAATAAATCCCACCAGCACTCCATGAATCCAAATCAAATCAGAGAGACTCTCTAGAAGTATTACTCTCTCTCTCTCTAAAAGTATGACCCTCTCTAGATGAATCTAGAAAGAGACAGAGTGGCACAAACATGTATGAAATACCATAGGAAATTATCAGAATAGCTAGCTAGCTCTATCAAAAACCTCCAAACAATCGATTCCAAGCTGTGGATGGCGAAACACTTTCAATGTCTAAGCAAAGAGATTTTGATCTCTTCTTCCTCCCAAATATTTGTGGCCCAAATCAGTAACAGTCAAAAACAGAGCAACCCAACTCTTGAAATCTCTTTTGTTTCCTGAGAGTTGAAGAAGAGAGAGAGTCGATTGCGAGGGTCGATCAGTGCTCTCAGTGCTGCAAAGATGAAAAACGAGGGAGAGTGTGATGAGAGAGCGAGATGAGAAGATAGTGCTCTCAAATGTTTTGATTTGAGAGATTTTTCTCAACTGGTTTTGTTTTGGCAAAAATATCTGCATAATAGATGGAATAGATGAACGGTC
>MSTRG.73769.1 Scaffold2987 1160149-1160768
TTTTGTGAGGTCAAATTCATCCAGTGAAATTTGTCAATAGTAGAGAAATTTGTGAGGTCAAATTCATCCAAAGAAATTTACTATGTGCATTGTGGCAAATTTATCCAGAGAAATTTGCCAGTAACAGAGAAAATTACTTTGTGCACTATGTTTTGTAAGGTCAAATTCATCTAGAGAAATTTGTGAGGTGAAATTCATCCAGAGAAATTTACTATGTGCATTGTGGC
>MSTRG.65935.1 Scaffold273 3353046-3355229
AAATGGAGCTACAAATTGCGCGTGTTATTACTTTCTGTCTATGTAGGCGGAAAATCTAATAGTTGAGAATTAGTCCAAAAATCACGGAGAATGGTCCACCCATATTTAAACCAAAGGGTAAATCCTCAAACCAGAAGAGAGTAAAATGCATATGAATTTCGCCTATGATTGGATTGAATAGGTACATTATTCATTTGTCTCTGTTTTACTTTCTGTTAGCTCAAATCCTCTCCACCATAATATTTTTTTTAATTGAGAGTTGGCTCACTGTAGGGTAGAGAAGTTTTTGGGACAGGAAAATATGGATCCCTGTTCCTTCTGTTATGTTTGGCTGCG
>MSTRG.111957.1 Scaffold4860 327730-345088
CGATCCTTTTGCTCACACTTTCATTTTCTTTTTGTATATATGTCTCTCTCTCTCTACCTCTCTCTCTTCTCCTGCTGTCTCCTTTCTCTCCATCGACATCTCACACAAACACACGAGCACCACCAGAGACAACCACCAGAGACAACCACCAGCCACTGCCAATTGATTGATTCCGAGCTTGGCATTTGATTCGTTTCATTTCAACTTTACGATCTCAACCAGCAAGGATTCATAGAGAGACAGGAGCTAATGAGGTCTTTCCCATAAAGTTGATGGCAAACGAAAGCGAGGGGAATCCCGTGCCAAAACCAAGCCTGATCAAACATCTATTCCTGAAGAAGTGAACATGAAAAAAGTTAACTACCGATCAAATATAACTTGATTGGTCAAACTGTTAAAGGATACAAAATTTACAAGTGGCCAATTGAAGTGCCTTAGAAAAACACCGTTCTGGCCATTATTTGATTGCTTGATCAGTAATGAAATTGACCTCAACCACTGCATGAAATATGATGATGTCATTGTACGTATAATACAGACATTCAAGCAATCTAGTGGGAGGTTTTACATTGGAGATAAGAACATCTAGATTTTTAGAAGCAACGTATCACTGATTTTTGGGGTGGATTGTTAAACTTAAATGATACACACACGTGAACATTCACATCAGTAATATAACTCACATTAACAGATGTGAACATTCACATCAGTAGTGTCACTCACATTAACAGATGTGAACATTCACATCAGTAACATCACTCACCATTAGTAAATGGGAACATTCACATCAGTAATAACATTGACATTAACAGATGTGAATATTTACATCAGTAATATCACTGACATTAACAGATGTGAACATTCACATCAGTAGTATCACTCACCATTAGGAAATGTGAACATTCACATCAGTAGTATCACTCACCAATACGAAATGTAAATATTCACATCAGTAATATCACTGACATTAACAGATGTGAACATTCACATTAGTAGTATCACTCACCAATACGAAATGTGAACATTCACATCAGTAGTATCACTCACATTAACAGATATGAACATTCACATCAGTAGTATCACTCACCATTACGTAATGTGAACATTCACATCAGTAGTATCACTCACTATTACGAAATGTGAACATTCACATCAGTAACATGACTCCCCATTAGCAGATGTGAACATTCACATCTGTAACATCAAACATTGATATAAATACTTGGTACATCATTGTATGCCCTTTGTGTGCAGAAAATCATGCAAGAGTACCCCCCCACAAGAGGAATAAACTGATTGATGTACACATTAAGGAGTGTCAAGGCCAGAGATTCTTAATCTTTCCAATACACGACAACTTCCACTGGACAATTGTTGTGTACGACGTGAAAGAGAATGTATGGAGGCATTATAACTCACTACGCCCAAGAGAAGGCATACATGACCCACATATTGACAAAGCACAAATACTTAGGGACTACATCACAGCTTTGGTGCACAACATTGGACCATAATCACCATTATGGACCAATTTATCAAGCCAAAATACTTCGAAAACAATCATATCAGTGGACATCTGTCCTCAGCAAGCATCAAATTCGGTGGATTGTGGGCCTGCAGTTTGTTACATCATGAGGGCACATGTATATCGTGAAGACATTGTTGCTAGCCTAGATCGCTTTGAATGGTGTCAAATAAGAGACTCATTAGTACACATTTTTCTGAACCACAGAAAGACAGTGCAATGTGAAAACCTATAGGCGGGGAGTGTCCACCTATCACTGTTACCCAAATCTGTTATCCACATTTAAGACAATTTAGTGTCAATAGATTTTTCATATTGGAGTAGACTAGCTTAATTGTAAATCAAGTCTATATCACTGCTTGTACTGATATTTTTCAGTTAATATATGTATATGCATTTTT
>MSTRG.131399.1 Scaffold6681 77079-140846
TCTCTCTCCCCTCCTTCTCTCTCCTCTGATCCGGAGGCCGGAGACCACCACCAACCGCCGACCACCACCACTACTCATCTACTTCACCACCCACACTAGTCCTCTCTCTGTCTCTCTGTCTCTCTCTCTCTCTCTCTGTGTAATCATCGATTGAAAAACACTTCGCATTCTCACAGAGTTACAGTCACCGGATGCTTCGAGGTCGCATTTCGTAGGGGTTTTTGACTCACCGTTGTCTGTCGCCGAAAAAGGAAACCGAGGAAGGGTTTTTTTCTTTTTTCTTTTTTGCGCAGAGCAACAGAGGTAGGATTTTGAACTAGTGCTGAAAATTTTTCATCTTTTGTTGGATTTTTTGTGGAAATTTGTTAATTTTTGAACATGCGGAGG
>MSTRG.136043.4 Scaffold720 2506876-2513125
CCGGGAGTCCCCGTGCTAGTTCCGTAAGCTTTCACGACTCGCGTCTGTCACTCCCGAGGTGTTTGAGGTGCTCCCGGCCCTTGTTGCGACTGTTACATGATTTTAGGCCCCCGATGGCCTACTGCCAAGCTTAAGTGTTAGAAAAGTGTGCTTTCCGACCTAGTTTTCAAATCGGGAGTCCCCGTGCCTGTTCGTTATGTTTTCACGGCTCAAATTGGTCCCTCCTGAGATGTTCGGGGTGCTCCCCGGGCCTTCTCGTGATTGTTACACGATTCCAGCCCGCCGAGGCCTGTTTTCAAGCTTCGTTGTGAAGAGAGTACCTTTTCCGACCTAGTTTTCAAACCGGAAGTCGCGCGCTAGTTTCCACAACTTACTTTGGTTTCTCTCGAGGTGTTGGAGGTGTTCCACGGGCCTTCTCGGGACTGGTACAGGATTTTTTTGGCGCCCGATGGCCTATTTTAAAACTTAAGTGTTTAGGAAGTGCATTTTTTGACGAAGTTTCCAAACCGGGAGTCCCATGCGAGTTTCGTTAGTTTCCACAACCCACGTTTGTCCATCCCTAGGTGTTTTGAGGTGTTTCCCGGACCTTCTCTTGGCTGTCACCCGATTTT
>MSTRG.130874.1 Scaffold663 1108645-1110503
AGAGAGTCGAACCTGCGAATCACAGAGCTGAAGTCAATCTGCGAAGTTGATCGAAGTAGAACCTGCGAATCGAATCTGCGAACCCTAATCGAACGTGCGAAGTTGATCGAAGTTGATCGTAGTCGCAGAGGAAGAGGAAGACAGGAAGAGGCGACTTCGATTAGGGTTATCTGAGCCCTATTTGGCTCATATGGTCCATGAGTCGTAATCCTCTATGATTACGAGGCCTTCGATTAGGTCGATTAGGTTCATCTGAGTCGTTAGATGGGATCAACGACTTGAACACTCAGTCG
>MSTRG.38584.1 Scaffold1877 43865-44221
TAAACCAACACCCTTCCTAAGCCCAGGATAAGGATCTAGGCTGCAGGACGTTTGGTCGAAATAACCAAACATTATTCTAAGTTGGCTGAAAAAACTAACTTAGAGGTTGGCTGGATTAAACCAACTCTTTGTACTCTTCAGCTGAAGTAAGGGTATGGCTGAAGAGTGGTTGGCTGGATTAAACCAACTCTTTGTTCTCTTCAGCCGAAGTAAGGGTATGGCTGAAGAGTGGTTGGCT
>MSTRG.53847.1 Scaffold2309 122762-125080
GTTGGAGTAAAAAATTACATAAAGCACATGAAGCCCTCGCCTTGCGTCTTAGAACCAGGCGCGCGCCTCAGCACCTCTTGTGTGACTTCCATGTGTTGCCTCACCTTGACTTGTTTGAAGCATAGGGTTGCACCTCATTGCGCCTTGCGCTTAAGCACACCTAAGCATGCTCTTTAAAACACTACTCTCACCCCTGCCCCTTGCTCCTACTCACAACCTTAAATTCTTCTTTTTGACTACAATGAAAGGCAATGAAATTTTAAAACCAATAGGGGAGGTCCCTGTAATTGTCATGTGATTAACCCAAATATAAAAACCCAAAAGTGAAAAAAATTAGAAAGGATGTGAAAGTGAAAACTATAAACCTAACAGCTTTAATTCTATTTCTGATGTATCCAAAAAAACAAAAGCTTTAATTCTATTTCAAAATGTGTTAAAAAAATAAAAATAAATAAATAAACGAATGATTGTTTAATTAAGTCAGCAGATAGACCCCACCCAAGAACTTGCATACCTGTTTGGTTACAGACCCAAGTGAAGCAAACAAGAAGTTAAGTATATTTTGTTTCTAAATAATCCATATATATGACTACATCATCAGATTTAACGAGTCCTTTTTTAACTTCATTCTCTCTCTTCGATCAACATGAAGCTCAAGCAGGAGGAACAACGTGATCAAAGTTGAGGCACCACTAATGACATTTTGTTAGCATCAAATCAAATCAACACCATGAACTCTAATCACATAAAGCATGGTGATGGTTCTCTCACTCTTCACAAAAAACACGGAGACAAGTCACTACCTCTTCGCAAAAAGCATGGAGATGGGTCATGATGATGTGCAGATATATATTTAGATCTAAGAAGCACGGACACTCCTAAAAATGTGACGTATCCATG
>MSTRG.140978.1 Scaffold790 1117066-1119389
TCCTTCTCTCAAAAAACACGCCCAAATCCAAACTTCTCTCTAAGATTAGCTCAAATCTTTAAGAATTTGAGAGAGCTTTTTACACCAAATCGAAGAGGGCGACGAACGCTATATTTACACCGATTGAATCGAGTTTTCATCAACGTTGAACTTTAGGGTTTTCATCTCCTTCCTCTTCCAAGTTTGAGGTAGGGATAATCTTTGAGTCGTATATATATTTTTGTAAGTCTATGATTGTTTGGAGTATTTCTTACATATTTAGATCATGATTTTGGGTTGATGAACCCTAGATGATACTAAAAGTGGATTTTCTCTATTTTTTTCCAAAGTTTTTGAAAGTATGGGCTAAACTGTGAGTGTTGTTTTAGAAAAATCTTTTCAAAGATGGAGCAAAAACCTAGTTTTTGTGGAAACCCTAGAATTTGGAAATTTTGAAAAAAAGTTGAGATGTTGTGAAATTTATGCTTGATGCATTGTTATGTGAGTAATTGATGAAAGAAATTTTGCATAGTTGTATCAAATGAGGAAATTCCATGAGAAGATGAGAATTGTTGATTTGGGAAGCTTGAGTAATAGCTTATTGTTGGTTTGTCTTGGAAAACCTAGTTTAGAATATGATTATTAATATGTGGAGAATACATGTATGTTGATATTGTTATATTATCTCCTGGAAATATATTATGGTGTTATGTTGATAAAAGATGTGAAAATTTTATCACAATGGAGGATTGTGTGGTAGAATTGAAAAATGGAACTACATTAATGCATCGTTACATTTTGCATTGCCATTCCATTTAATCGTTGTTACAATTGATTTTGAATCTTTCGTTGAAAAATTATTGCTTTGAGAAAGGTATTGTTTTGCGAAACAAAAACATCTTGAATTGTTTTGAGGTAAATACATTGATAAGTCCAGATAGGGGTTGCAGTTTAGTATTGGTTAAGTTGGCCTAAGTGTCCATGATGAAAGACCGAAAATATGTGCGGAGGAGGTGTCACGTGCCTTCTGGTTAGCAACCGGTAAAGTGGTGATTGATAGTGCTTGATATGCCTATTAGCAGACACCAATCTATGGATTACTTGAGTCGTATTTACCACCTTTTGAACTAAATTGAAGTTATTAAATTGTTGTGTTTTCAAATTGCATTGAGTACAAGGTTTTTGAAAGATAGAGATATATGTTTTGAGTATGATATGACACATGCAATCATCTTAGGAGACTGTATAAAATGTATATACTTTGTTAAGATTTTTTCTTACTGGGTTTTGTGCTCAGCCTATGAAATTTTGTGTAGGAAAGGATATGGTGATCCTGCCGAGTTAAAGGCGTGGAATGTATTTTGAGAGCATAAGGTTCTTTTCCTTTTGTTGTAATTTTGTTGACAAGCCAAATGCTTTACTTGTATGGGTTTCAAAACCATTATTTTGTGTAACCAAGCATAAGTCTTGGAAATTGTAGCCCTTAAGGGCATTGAATTGTAAATGTCATATTATGTCACTTGTTATAGATTCATATTCTAGGAATATTGAATGTATAACCGCATGTTGAATATTTTTTGTAAATCTCTTGAGTTTTAATGAATACAAATGTTGGAGATTTGATGATGATGTTAATATTGAAGCTTTATTTTTTGTTTATATTAAACAATGGAAGTTATTGATTTGAAAATAAGATTATATAATTGAAAGTTGATGAGTCTATATTGTGTTATTTTTTTGGGACATTACAGAAGGATTAGATTAATAATTTATACACTCCATATAAATCATGTTTGATTGTGAAAACCCAAATGACAAAATTAGCATTCTCATAGAAAGGGTACCCTACACTATGAGATTGGAGATTGAAAGATTATTTTGTTACTGCTTAACAAAAGTAATAAAGTACTTTTATATAATGTGATTTTTTTAAAGTAAGTTTATGAATTTAATTTCAATTAACTAATATTATCATAGTAATCTATAAATAAATATAATTAACCTTACATCTTCCAACACAAAAGTAATTTTATTAGCTAATTAATCCTACGCGTACTCGCAGTTGACCTAACTCAGATATCAAACATGGCC
>MSTRG.116952.6 Scaffold5289 773059-774712
GGGAAATGAGAATGAGACACATGAGTATATAATTAGATCTTATATTTTTGATAAATGAATGGTATTACCATGAGCTGATGCATTTATATTCTTAGGTTGAACCATCTGCCCAAGGGAAAAAATTCCCATTTTTGGTTCACAAACATTGTGTTTAGATTTTGTATTTAGCGTTTGTTCACAAACAGAAATCAAGGTTCAAAGGTGGCTGATATTGATATTTGTTTTTCTCTGCAATGACTCAGGTTTATTGTTGTTGATCTAATCGTGGGAGTGTATGAGGGCTAGGATTTGGGGCATTACCATCTAAGGTAGACGCACAAGTACACCAAAATGAGCACATGAGAAAACTTGAAAGCAAGGTGCTGGACTTAGAACAACAACTCGATGAGATAAGAGCCATGCTTATCAAAGAAAGAAGGGTACCAATCCCTCCCAAAGAAGCTCCAATCTACTCCTCATGACAACCTTCCAACTTCAGTGAGTGAAAATAGTATTTTCAAAACATTTTTATCTACTTTTCATGTCTTTAATTGTTGGAATTATGTGGTAGCTATATGCTTAATGAAGTGTTTTTATGGTTTTTTAGGTGAATGAAGTTGGTTATGTTACTGAAAACATTGAAGCTATGAAATTATCTAAATGTGGTGGTTCTTCAATTGCAAACCTTCCAACTGGTTTAGATATGGTAAGTTATGCTGTTTTTCGAAGTGCCTTTTTTTTCTTTCTTCAAAGTCCATTTTGCAATTTACTACTGGTCTTGTAGTAATGAAATTATAAACTGCATTGTTGATTTGCTGGAGATTGAACTTCAAGCCAAATAGGCACTGCTGCATATTCTCTACTCATTAGAATAACCAAGTTTTGTGGTTTGGCAGATTTACTAATTTCAAAGCATGACAACTTTTCGTTTTTTCTTCTTTTTTTTTGGTCAACATAAAGCATGTCGACTTGATATGGCATTTTCATTGGATTTAGCTCACTGTTTCTCTCATGGTACAGAAAATAATTGTCAATTGACATAATTCTTGGTTGATAGAGTTCTTTTAGGGTTTTGTTGATATTTGTGGGGTTTACTATTGGAACTAGCATATAAGCAGAATCTGTAGTCGGAATTTCATCAAGGTAAATGTCAGGAGTACCAGTAGAGAAAAACAAAGTATTATAATAGTTTCATGTAAATATGAGGTGTTTGATTCTCAAAACAATTAAAAGAAATGAAAGGTGATGTGTTGAATACAATCCAAAGATATACTCGGTCCTCTATTTCTTGCAGCTGCTCCCAGTACCACCACAAGCTAACGGTCTCATAGAGTGCATTAGATACCTATTATGTGCCAAAGGAGTGTATTAGATACCTGTATTAAAATAATTCTACAATAGTGTGAACACTGTAGTTGAAATAAAAATTAAAAAAAAAAGGGTCATGTGAACACTGGATGGTACCTTTTCCACGACGTGGGGTTGTTCTTGGGGTCTACATCACATGGTGTGAACACTGGATGGTACCCTTAGCAGTGCATTTGCTTTGCCAAGAA
>MSTRG.122863.1 Scaffold584 768181-769116
CTCTCTCCATCATTTGTTTCACCTGGGTCTGGTGGTTCCTGATCTGGGTGTAAAGGATGAATAGGGTTGGAAGCTGGGTTTGTAACTGGTGGGTAAGAAAAAGTAGAGATTGGGTTAACTTCAACCATAGTAGAGTCTGCTGGACTTGGGGTGGTTTCCAATGTAATGAACATGTCAGAGGTGTTCTGTTGAAATTGATTCGCAGTGAGATGTGTTGTCATCTTGGTTTGATCACGAGAAGTGCCCTCTGCTTGCAGAACAATGGCGTGTGAGGCTGAACTTTCCCCCATTTGCTGCCAGACAACTTGCTGGTTGCTACGGGTGCCTATCTCCTTAGCTCTATTATGCTGGAGCCCTTGTTGATGTTTACCCTTGGAAGCTGGATTTTGTATTGGACCACTTAAGGGGCTGGGTTCTCCTTGGGCTTTTCCCCCTGTATGTTGAGTAGTCTGCCTACCCGTTTGAGCAGAACCAAGTCCATCTTGGCCCTCTTCCAAATACCGAAACGGATTGGTGTTAGTAACTGTGCTAGTGGGGTTTTGGGCCCTTTTGTGTTGGGCTGGTCTCTTAGGGCGTTTAGTCACTAACATCCATGGGCCAAAAGCAACATCTTCTTCAGGAGGCTGGTGCAGGTGGCCGTTATCAATCACAGGTGAATGCTCAGATGTAGCAGTACCAGAAACGGCTATATTTTCCACCGCCGGTGGAGCACTGGTGGATTTGAAACGACATGCCTCCTTACGGTGATCAATTC
>MSTRG.16954.1 Scaffold1364 551638-555847
CTGCAATCACAACCAAATGTTACCGTGAGGTTACAAATATTACCCTACAATCCAAGAAATATATAGACTTGGCCATAGCATCAGACTTAAGTTTTCGGCATGAATTGTTGCCCATATATATATATATACATTTATCCATTGACCATCAAATATTAATTATCCATATTAGAATAAGCAGAAGACAAAAATCACCAGTCTCATAATATTCTAGCATTATAGTTTAAGAAGTGAGTCCAGTACAAGGTCAGTTGGCAGATAAATGCTAAAATGCTCAATAAATAATGTTATCGTGATAACAATCTCAAAATCAAACAAGATAAGCCTTCCTTTTTCTTTTTTCTTTTTTTTT
>MSTRG.103071.1 Scaffold4295 802919-1053448
CTCTTCAATGACCTTGTCATGCTTCCCTTCCAAAACTCCCTGCAGAGTTATAACTGCATCTTTTGTTTTTGTGAGAATATTGCTCTCATCTGCAATTTCCAACTGTATAAGGTCATTCTGCGACGAAGTGAGGCTGACAGCAAGAGCATACTGGGCAGCTGCAGCCCAACGAGAAGAGGCAAGCCATCTTCTCTGCCCATCTAATTGCCAGCTCTCTTCTCTCTC
>MSTRG.15525.1 Scaffold1326 273073-290353
TCTTGTTCTTCTTCTCCTCCTCTTGTCCCCCTTCCCGGCGGCCGTAACTCTGAAAAGGCATCTCTCCATCTCAGCCTCTGCAACGTTTGTTCTTGCTCTGCGCAAACCAGGTTGTTGAAGCTCACTCTGTGGGGAAGCTTAGGAGGGAGGCGAAGATGCTGCATCCTATAGGGAGACATTGATGACGAGAACAACAAGCTCAAGAAGTTCACCATCATCGTCTTCACCACCATTGCGTCGATCACGTTCAAGATTCCAAATTCATCATCATCATTGCAACGGCAACGGTCATGGTCTCCACGATCTGCATCATCATCACCATCGGGCGGTCGACGATTATGGTCTCGGTCATGGTCCCCAGTAGCCTCCTCATGGTCTCAATCATGGCAGTTTGTTCGATTATCTCTGATTAGCTCGTGAAATACATCTCATATAAAGAGCAGTTTTTCCGATTCCTCACGTTTGGTA
>MSTRG.29950.1 Scaffold1688 200526-216311
GTCCCTCCTGAGATGTTCGGGGTGTTTCCCGTGCTTTCTCGTGATTGTTACACGATTCCGGCCCGCTGAGGCCTGTTTTCAAGCTTCAGTGTGAAAAAAGTACCTTTTCCGACCTAGTTTTCAAACCGGAAGTCCCGCGCTAGTTTCCACAACTTACATTGGTTTCTCCCGAGGTGTTGAAGGTGTTCCGCGGGCCTTCTCGGGACTGTTACAGGATTTTTTTGGGCCCCCGATGGCCTATTTTCAAACTTAAGTGTTTAGGAAGTGCATTTTTTGACTTAGTTTCCAAACCGGGAGTCCCATGCGAGTTTCGTAAGTTTACACAACTCACGTTGGTCCCTCCCTCGGTGTTTTGAGGTGTTCCCCGGACCTTCTCTTGGC
>MSTRG.66657.1 Scaffold276 28553-28917
AGGGGTTGTGGCATTGTGGTAAAGCCTTGGGGTTTAAGCCCCAAGGTCACAAGTTCAATTCCCCCCCTTGGGCCAATCTCCTGGGCGAAGCACTGTTGGTTAGGAGGTTGGACCTCAAGGATGCCTAATCAGCTACTTGGTGTGGGTTTAATGCTCCCCCGCTGTGCGAGTCCTGACTTAATCGGAGCTTGCCTTGGGAGGTCGGGACAAGCTTCCAGGTTATAGTCTCTTACTCGGAACGGACAACAGGAC
>MSTRG.98285.1 Scaffold4094 1120770-1122425
TGGACCTTATCCTTGAGAGATAGACTCCTAGCGTGAAGCGGTGAAAAGGAATTATAATCACACTAGGACTCTATTATGCCAAAGTAGATATAAGCCTCAGAGTAAACCTATGAGAGGACAAGTGATACCACTCGCAGAGGTTTTTTCTTGATCACAAGGTAATAACGTGAGGGATAAATTCTGCGTCTGCACAATATATAAGCTTGATTATATGCAGATAGAAATATTCGAATGACTTTGATGAGATTGTCTTGTTGATTGTGAGCCAATGAATTAAATCAAATTTCATCAAATTTTGACCTAATTTTTCCAAACTTTGTTAAAGGCATTTTGTCATCAAAAACTCATTTCTCCTTCCTCCAAAGAGCCCAAAACCGTTCTCTTTTTCAAGTTTCTTGTGTTTTCGGTTCAAAAACTCAATTGTTGGAGCTTAAAAGGTGAGTTAGGCCACTCCCATTGGCCTAGGACATTCCTTGAGTGAGTAGAAACTGCAGAAAGTGTTCTAGAGAGTGTTCTTGACTAATCTTTGGAAACCATTGTTGGAGCTTGATGCTTGCTTGAACCTTTCTCTCCATTGTTTCTCTATTTCCCAGCTCTAAGAACTTTAATGCGGGGATTTCTTTTACTATGTGTATATAGGATTATGTTAGGGTTTAATTTATTACATAATCCATGTTTAAGCTTGTAATTGATTTTATGCTTATCTCCATGATTTTCCATCTTGTTCCTATCTTTTTTCATGATTTGTAGCTCTCTTGAATATTTGGCTTGAAATTCCTAGAAAGAGCATATTAAGGCTTATTTTCTCAAAATATGATTTCATATTATAAATGGATGTTTGTGTTTAGAACCTTAAAGTGTGCTCTAGGAAGCTCGATAATTGTTTTGATATACCTGTACTTTTGGGCTAATTTTGATAAAAAGGAAAAAAGATCAAAGAAAGTGTAGATAAAAATAAAAATAAAAAAATGTGATTTTTTGACAGATGGCAATTGTTTAGAGTAGAGATAGCATGATTTGGATGTGTATTGAAATTTTTATGAATTCTCGAACGTATATTTGCTTATTAGTTTTGCTAGTTAGAGGTATTATGATGATGTTTCATACCCTACATGCTTATAAGCATGTTTAGTATATTAAAATATGATTTTTGCTGGGATTAAAATGGTCCTTTTGACACATAGAGTTAATATGGAAATTTGAAAGGATGGATAAATTGGTAATTTGATCCATAGGGGTAAGGGTAATTCATAATTCTATTTACACAACAAAGAATTCTCTTTACACTCAATTTCTCATTACACAACATACAAAAATTCAATTCTTTCTTTATAATCCCCATAATACCCATCATAGCCTTCATCCTTTCACTTCCAACCTAACAAACCCTAACTTTATCCCACCCCCTAAACACCACCTTCGGCAACCACAATTACCATTTTCAACTCCAACATCTAGACCCACCCCACTAGCGACCTCCCTCATTCGCCATCTCCGATCATCCTTCCCAACTCCCCAGATCTGAC
>MSTRG.75488.1 Scaffold305 2390394-2396736
TGCCAGAGAAAGGATTCAGAAAATTCAAAATCTTCTTTAGTTAAAAATGAGATTAACAAAGTGTCAAAAGCCTAGTACAAAATTGCTGCCCATAAAGATTGAGAAGCTAATGGATGGCATTTATAATGTGTTTATTGAGATCTCTCCAAAAAAAGCTTTTTCCACTGGAAAAATGCCATAGTTGGAGATTCTAATTCAATTATGTGAGAACTTGCGCAGACAAGTTTTAGGAAAATTCTCTTGAAAATGTTGTCTATATTTTTAATGGTTTCTTCATTTTTAAAATAAAAAGTAAAGAAGATATGGACAAATTTTCAGAGATGATCCTAATTATGTTGAGGTTAGATTAATTGTTGTTAAAAAAAATAAATAAATAACAACCTGAGCTAAAACTAGCAAAATGTGACTTCTTAGTTGTTCCATTGTGGGTGAAGTTGTACAATGATCCATGTGACTTCTTAGTTGTTCCACTGTTGGTGAAGTTGTACAATGATCCTTCGGACCGAAGATGGTTTCGGTATGCTGCTAGTATCATTGAAACTCCTCTCTACTTGAATCAACCTACTTTTAATAGAAGCAAACTTACTTTTGTTATAGTACGTATTCAAATGCCAACAAATAGAAAAAATCTTGAGTCTTGCAAAATATATCTAGAGATTATAGTGATCCGTATGATATTAGAGTTAAGGTAAACTCCCGAGTCTTCAAAAATAAATCTAGATTATGGTAATCCATATGAGATTAGAGTTGAAGTTCCATGGAAATCACAAAAGTGTGATGTTTGCAAGGGCCTGGTCTCATAAACAAAAGACATTTAATCCTCCCTCTTATACAAACAATAGTGGAGAGTCAAGAAAACTAAAACACAAAATCTAACAAAGAAAAAGTGGTGAAGAAGAAGAGGAAAGATGGTATGCAAGTTTCTTTAACAAATATAAATGAAGAGGGGGGACAAGGTCCTCCGCCACTTGGTGAAGAGGTGAAGAGACAAAATCCGACAAAGTGGGAAGTGGTGAAGGAAAAAAAAGGAGATAATGTGCAAGTTTCAGTACCTGATATAAAGTAAGAGAGAGGGACAAGATCCTCCATCTCTTCTTGTTAGGACTATGGGACACCAGAAATCAATTCCACACAATAACACAAGAATATTTACATGGTTCGGCAATTGCCTACGTCCACGGAGAGGTATCCACTATAGAATTATTCCGGAGGGAGATTACAGAACTCACACCTCACAACTCTCTATAGAACTCTTACTCACAGATTATACTCTCCTCTGTGTATTCTCAGCTCAGTGTGTCACTCCCATATGTCTCTCTACAACCCCTCCTCACTCATGTCAATTTATAACCGAGTGAA
>MSTRG.48226.2 Scaffold2148 1282738-1285354
CATAACCTTACAATCAGACGGTTGATATGCCATTACAAGGAGAGAGAGAGAGACATGATGATGAAAAAGAGAGAATTAGAGAGATAGAGATAAATATACATTATACATAGATACATGTATAGAGAGAGAGAGAGAGAGAGAGAGAGAGAGAGAGAATGTGCATGGGTTCGTGGTCATTTCTGGAACCCAGCTGGTAGGTTTAAAGGTTCTCTTCCCTGTAGCTTTTGTCTTTTTACGTGGGCTTCCCACTCTCTCTTTTACCCTTCTTATAATCCCCCCAAAACAAATCATTCTCTTCATCGTCACCATCTCTCTCTTCTCTCCCCCTTGAAGAAAGGCGAGACTCTTGGGGGACTTGCAGATGACAGAGATAGAGAGAGAGAGAAGCATGAATGGGAGCTGAAGAAAGATGATCAAGAAAAGGGGTTGTCTCTTTTGAGGGGAATGTTGTCTGGCTCGAGGACCCTTTCTTGATCAGTATCTATTGTAGATCTGAGGTATTCATAGATCTGTATACATTTATACAAGAGAAAGAGATAGTGTTGTCGGACCAGGCTTCATTCCCCCCAATTATTGCTTCCACCTTGATTTCCAGATGATCTTGCCCTTGATCTGAAGTTTTGGGGGAAAATTGGCAGTTTCGGAAGATGGGTTATTGTTTTCAAGAGCTATATTGGTGTTTAGTTATGTTGCAGATTGGTGTAATGATGAGTATCTTGACTCTATATTTTGCATCTTTTCTCAGAAAGTTGTTCATCATTACACTCTTTTTGTGTTCTCTGGGCGATTCTCTCAACCATGTTATGATGGTGTTTCTTGTGTCAGCCAAGCACTTTTCTGGGTCATCATTTTTCAGATTTTCCTCATCATCAACTCCACAACCTAAATCTGTTTTTTATGCTTCTTTTATTATCAGATCTGGCTCTTTTAACTTCGGTAGAACTCTCTCTCCTTTTTCTCTTCTTTGATGCCTCTTCTGAGGGTTTCCTGGGTAGATTTAGCACTATGAACAATCAAAGAAGCCTTTCTCTTAAATTAATTAAAATTTCTATTTTCAATTCGCATATCATCTCTGATTTACTCAGATTTTGATTTCTTTCACTGACTTTTCACTCACTATACTATGATCCTTTAGCCATCTCTATAATCCTTGTTTGTTATTGTAGTTTTTCTTCTTCCCAACCCACCAAGTTGTGTTTTTTATATGTTTCAATCATCTTTTTTTTTTTACAGATCCTATCAGATTGTGTCTACTTGTATATTTATTTATTTGTAGTGGCTGAACAGATGGAGTTGCATCAAAAGCTTTGAACTTACCAGATAACATAGTGCCCGACGTTACTGATCCAATCCATTCTATTACTGCCATTTGTTTCTTATAATGGCTGTCTTTTATTCAATTCAAAACTTATTTCTTTTATTTTCTTACATGTTTTATGCATATTGAGTGATATTAATATATTTGATAACAAGACAAAAGCTACTTCTGGTCTGAGGCAACCCACTTGCCTTGGCTTGGTTATTACTTATTATTGCACTCAACTGAAACTTAAGTTTATTTTTGTGTCCTGTCTTTTCTTTTACTTTAGTTTCACGATTTTAGCCATTAAATTAGTTGATTTTCAGGATTAACAAGTTTCTCTTTTGGTCTCTTCTAAATTTTTGCTCAATGTTAACTGGTTATTTCATGTAGATTCAATTATATTAGTAATTCTTCAATGGATATCGGCCAATATTTATTATCAGTTCACCCGCATCAGATTTTAGACTTTTAATACCAACATATCAATCGATATAGGATTGTATTACAAATATTTGTAAATTGTAAGTATCCTAGTACGACTCTATGGCTCAATGTTGCAATGTATCTTGGGGTTTAAATAATTAGGTGCAATATGGAGGTAAATCTGATTCTCTTGATGTACTTTGCAGAAGCATAGCTAGTTCTGTGACAAGTTTCTTTTGTGTTCTTCATTTTACTTTGTTTGTTGTGATTATTGTTAATCAAAACTTTTTACGTTGTGCTTTGAATCATTGACAAAAGGTAAAATGGGTTTTAATTTGACATTTTGATTGTTTGTGTTCCTATCATTCTTGTCCTTTACTTCGCTTTTGGATCAAAGCTTAGGAAGAGTAAATGAATACGATTGAAAGTAGGTAAAAGAAAACCTATATCTAGGCCTTTGGGACCTAAACAACACGTGTGATGACTCTCTCTTTTCTCATATAGGCCTTTAATCAGCCGGTGATTGTTTCTCTTTTTTTTCTCTCACATACATTTAGGCCCTATTTAGTTGAAATTTTTGTTTCTTTGTTTTCAAATTTATGTTTTTGAAAACGAAAACAATGAGAACCTGAGAAATACCTACTGTTCTTATTTTGGACAAATGAAGTCACTTTCTTTTTAAAAAAAAAATGAAAAAAATATAATAAATTTCACAATTTTAATATAATTATATTGTTTTTATCTTTAAGGTTTTAATTTTTATAACACTTACTCTCATTGAAAAAAT
>MSTRG.136447.3 Scaffold7286 1073740-1212133
CCATAATTTGATTACCATTTACCACATGGCCATTTAGAATGAAGATGTGTAGCTAAATCATGGACCGACATAATTTGAAAGGTTATCTTCTCTTAAATTTGTTTTCTATTCTCCACTGGAAATGGAGCTGCATCGGAAACTATGACGGAATGATCGTTGTGTTGCGATGTGAATACCCAGTGGCAGTTTAGATAATAAATAAATAAAGAGAAAAAGAAAAGGTAGAAGAGAAAGAGGTAAACGTAGGAGAAGATATCCAAGAGGGAAAGAAAATAGTAAAAATTTTGTATCAATGTAAAATTTAAA
>MSTRG.96243.5 Scaffold3986 37135-37604
ATCGACCAAAACTAGCGCCGATTGACCACAACCAGCGCCGATCTGTCTCAGTCTCTAGCTCCGGTAATTCTCAAGTAAGGCTCTCTCTGTTTCATCTTCTCTCTCATTCTTCCATCCCTCTCTTTCTCTCTCTCCTCGATCGACCAGAACTAGCGCCGATCGACCAGAACCAATGCCGATTTGTCTCTGTCCCTGTCTCCGACAACTCTTAGTTAACTCTCATCTCATCTTCTCGCTCATTCTTGATCTTCTATCTCTCTTATTCTTCCATCTCTCTCCCCGATCGACCAAAACTAGCACCGACTGACCATACCAGTATCGATCTATCTCAGTCTCTCCGGCAACTCTAAGGTAAGC
>MSTRG.85169.5 Scaffold348 1034627-1039882
AAAGAACACAAATTCCATTATTTATCTATTTTATTTTATTAAAACAATCCTCTTTTCTATTCAAATCGCACTGTTAGGGTTTCTTCTCTTCTCTGGAATCTCTCACTGCGGCTGCGTCTCTTTATCTCTCTCTAGGCCCTCAGTCCTCAGGGCCATTCTTGACTCGAAATCAATTTTGGGGCTGGTCGAATAGCTCATACGTACTAACAGAAAGTACAGGAAGAGAAAAGTGTGAAATTGCTCCTTCCATATCTCATTTTGAAATACTCCAAGACTGAAGAACTTCGAAGGTGCTAGGGTTCCATGTCTATTCAATCATCTCCTTCCAGAAATACTCCCAAGAGAGTCTGAAGAACACTTCGAAGGTGCGATTGAAAGGTTTAATCGAATGTACTGGTGATTGATTCTCTCCTTCGAAGGTGCGATTGAAGAGATAAGTTCATCTTTGATTCTTTCCCCTTTTCTTCTTCGATTCTTTATCCTCTTTCTTTCATTTTTTCTTTCTAGATTTTTGTGCTGTTTCTTCGCTGCAAACGATCGATTCTTCCTCTTTGGTTTTCTCTTTCT
>MSTRG.88133.1 Scaffold3601 189917-194557
GGTGTTTTTTGTCTGAATTTTATGTATGAATGGCATTTTCCTACAAGTAAATATAAAATGCAAGAGATTACAAACACAAACAGGTGACAAAAGCATTTTCATTGTTTTGATCAGTAATGTAAGGAGACTAAAACTTGAGTCTCTGATCTCTTTTTGCTGATGATACCATCATATCGTGTGGAGCTGAGCTGAGGAAGAGTTATTGAGGTTATCTCCACAGTATATTGGAATGCTTTGAGGTGGTGTTGGGTTTGAAGGTCAATTTGGCTACAAATGATCGCATTATTGGCAATCTAGCGCTGCAGGGGAAAATGTTGCCAAATCATTTTTGCATCATTGTATGCGTAAAAATGTCAAGTAAACCTGAAACCACCTTTTGATTCACTATGCAATGAGAAAAGCAAGCAAGCCCTTTGACTGTTGAGATTTTACATGATTTTTG
>MSTRG.25319.1 Scaffold157 36829-88075
CCAACCAAAGCCAGCAGCATGCCATGCCACGGCGAAGGCAGCCCAGCCAAAGCCAGCAGCATGCGATGCCAAGGCCAGCAGCATGCCATGCCACGGCCAAGGCAGGCCAGCCAAAGCCAGCAGCATGCCATGCCAAGCCAAGGCTAGCAGCATGCCATGCCAAGGCCAAGGCAGCCCAGCCAAAGCCAGCAGCATGCCATGCCAAG
>MSTRG.24407.2 Scaffold154 1334243-1334918
GTTTGAGCTTGGGAACAAAGATCACAAGAGAGAGAGATAAGGAATGAAATAAAAGATACTCAAAGAAAATGGGTTGGAAAGTTGAAGCCTTGATGGAAGGGGAATGAAGAGGGGCAAGGTGAGATTATGTCATGAGTGCCTTATGATTTGCATGTGTAGAGAGAGAGAGAGAGAGAGAGGGGTGAAGGAATTGCAGAGGCTACTAGTAGTCAGCAAAATAATGCAGGAAAAAGAGGGAAGTAAACAGAGTTTTTCTTGGGATGAAGGCTTGAAGGAAAAGTTAGTGAAAAGGGGAAGCTGTGTATTTAAGCAGGCAGAGAGATCAGACTTTCTCTCTTTCCTTCTTTCTAGAGAGAGAGAGAGAGAGAGAGAGAGAGAGTGAGTGGGGGATAGGAGGTCTGATTTCCTTATCTTTGCAATTACTACTAGCTTCTAAATGGGGAATGAAAAAGGAGGTTGCAGAGATGTAATGGTGGTTGTGCAGAGAAAGGTTGGAATTCGAGAAAACAAAAGGAGTACTGTTCAATGGAATATTGGAATTGGAATGGAATTGAGTCTCTCTCTCTCT
>MSTRG.97763.1 Scaffold4078 370086-370926
AATAATATCACTCCATTATCACTCCGTGAGCGCTCCTAATCTATAACTCCTCTAAGTGGCAACGTTCCCCCGCTCCCGCTTTGTGCAACTAAGTGTAGATCCCTATCACTTCACCTGGGTTGGATCCTTGGGCTTAATGCACAGGGTATGCAATACCACTTGTGAAGCCGGTTTCTCGGGAGGATGATAATTGCCCAGTCCGTGACAAGTGAAGGGAGAGATTTTTAGTTGGAAGTGGGAAGTTTAAACAGAAAGACTGACAATTGTTTTCGTTATCCAAAGACTTGGATAGCCATGCATTATATGTATGATTATGTCCCTTGAAGAGGTGATGCATAAACCTGGAGGATTAGACATCCAAAGTACCATATGAGGTTTTAACACATTCAAATGCTAGATTGGATATAGATATTGTATCAGGTTCGTTTTAGCCCATCTAAACACAATCAGTGCCTGTAACGTAAACAGGCTATTGTTTATTTACTTGGTTTCTTTGTGGAGAAATTACAGGAAAAGAAAGAGACTTGGAATTTCATATATTTCTCTCAGATCTGAACTTGTGATATTTTCTTAATCAACTTTCCTGTGTTTTTTCTGCTTTCAAATGTTAATGTCTTTAGATTCGTTTTTGATGGGAGCATTGGAAAACAAGTTTTAGAATGTGCTGCCTATTTATCTGTAGTCCATAGTTCACTCTCCTGCAATCCTCTTATCCTGTTTGTAACATGGGTTGACAAGGACTTATAAGGGGGTTGAAGATGTTGGCAGTATATTATATATATATGTA
>MSTRG.58350.1 Scaffold2449 96215-98435
CTCCTGAAAACATGCATCAAAATGTATGTAGTCAGTTAATACAAATTGGCATGAAGGAATATTCAATTAACAGAAAGCATGAAAGAGTAAAATAATTCACAAACTGAAGTGGTGGTAGGTCAGAAGTGCGCGTGACACAAACACACTAACACAACAATTTTAGAAAAATGCAGGACACAGCATGTAAACACTTGACTATCCTCTGTAAAATATAAACCATTTATCAGCGGCTTAATCAGAGCATGGGCCAGATAGCACTCAGGCCACTGCTAGAAACAATTGACCATCTTTTAACTCAGATATCAAAAGTTATGCTTTAGCCTTTATACTTCTTTAAGATGATGTTTTGTTAAGCATAATAATAAGTTTAGTCCGGTTACTAACAGAAAAGTTAGATATATAAGCAAGCATGTTGAGTTAATGTTGAGTCATTTGTAGCATTTTTGGAGTAGCCATCTGTTCGAATTAACCTACATCTTTTTCTTTTCTTTTCTTTTCTGATTGAATTAAGCATAAAAAGCTCCTACAAGAGCTACAACTGAAACTGGAATGGGCATTGAACAAAGGGTTTGCACACACACACACACACAGAGGTAATTTCAGGGGTGATGGCTGCCTTACAATAAGAGTGGGCGCGCTTGGAAACTAATTGCTCTATAATTCAAAGGATATCATATGACCATGTTTACTTAGAAAATGAGAAAAACTATTAGCTAGTAAATATAGGAGTGATGATCTGTTTCTATAATTTAAGGGGTGATTGCCTTACATGTATTGTTTCTAATTCTTAATGGCTTGCATATATACATATATATATATATATATATTCTAACAACTAAGGGTGTAATACTAATCCATCATGGAAACTTATTGGTATCATAGAAAGTGTTTATAACTGAGAGAAATTTAACTAAATAATTATTAGTTATTAAGTCTAGAAGATCCATAAGCACGTGTTTCTTTTTTTGTTTGTGATATTCTTGTCAGCCACCAGTGCATCACCTAGCCTGAAAATCACCAAGCTATAGAAGTTTGAAGTTAGCAGTACTGCAACAAGATCATTTCAAACTCAACTCAACAAGCCCTTAGTAGCAATTAATTGGGAATAGCTACACAGATCTGTTTCATCCAATTGGCTCTACTACAAAGACAATTCAACAAGGTTAAACTATTGATTAAAAAGAACTAGCTCAGTTATCCTAGTTTAATTCCTATCTTAGCAGAAGCTACTTATAAGTTTAAATTCATAAATCTCTGCAGCAAGGTAGCCAAGTCAGAATTTTGATAGCAGTCCTTGGTTGGTTTCATGAGACACACAGAAAAGTGTTTTGTTTGATAACTTCATGCTAGATAACATAGCACTTACCCATCTTGGAATCATTTCAAAAAATTTCCTTATTTTCTTTTTCCGGATTTAGTCCTATGCTGTGCACTTTTTTAAAATTAATACATAGGTTATATGCATCTCTCTCTTCTTTTAGATGTATTTCTAATTGATACCAATGGCAAGGTGCGTGCAAGTTGATTAAAGTTTATGATATTCCACAGCTAGACATGAATTAGATCATTTCATTTTTCAAAATTGAGCATTTGCTTAGTTTATTCCAGCAAGTTGGCATAAGTTAGGGTAAGTAATGCTTTGACCGCAGATAAGATTTTGCACTAGGACAGGTAGTGATGTTGCATCTACTGTTGGTATGCTGCTAATGTTGATGCTTCTCTATCAACATAAAACTACTACTGATAAATAAAAATCAGAAGGACTACTACCATTTCTCTACTCTTGCTGCCTTTGATAATGGCATGGCAATCAGCAGAAATAAGGTCCTATTAGTAGACACTATATTACTTGTTTGAAATGCACTTTAA
>MSTRG.12968.2 Scaffold1268 1452247-1458450
TCATGATTCCTATATATAGAAGAGGGTGAGTGTGTAGTAGGTAAGGAGTAGGTGAAGTGGAGGTGGTAGTGGTAGTGGTAGTGGTGTAGTGGGTTAGGTTTAGTGGAGTAGGTGAGGTGGTAGTGGTGTAGTGGGTTAGGTTTAGTGGAGTAGGTTTAAGTGGGTGAAGTAGGTGATAGGTTTTAACAGTAATCATTAAAAGAACCCTATGCCCATTTTAGT
>MSTRG.3667.1 Scaffold1076 266689-323411
CACATCAAATAAAAGATTTGCAATTTCAAGTAAATCAAGTCTCTAATAAATTAAACATATTTCCACTTATGAACTTGGTGTACTCTCAATGTACCAATCTCATACCCATAAAGTACTCATGGAGTACCCAACTGTCAAAGAATGAATAAAAAGTACCCGATACGTATTTTGAGTACCCAGTACGCATGCAACCCTAATGGTACCAGTACCCGATACAAGTATGGCAACATTTTCGAAATATCTGTGCTTCATAGGTTTCTACATGATTAATTTGAAAAAACAGTAAAAATACAACTATATTTTATTGGATGCCTAATTGTTAAAAGAAAATTATTCTCGAATACCCCTATCATACCACATTTTAGAGCATGTGTTGTACCACATTCCCGTTCCCGTTCAACATACTAGAATGATCTGCATTCCAGGTAACATAGGTACAAACTTTTACCCTTTCGCATGAATAGTGCAAAGTGGCCACCTAAGATTTGAACTTAGTGGTCCAATTTTTTTTTTCTTTTGATAAGTAAATTTATTAAACTGGCAGTCAAACTTTGACCATAAAACCAACAATAGCCCCTAGTTTTAACCGATAACTCAACCAAAAACTTTCCTACTATGATCACCCAACTTCAGGAACACAAGGCATTCACAAAGGTCCAGAAGTACGTTTTGTAATTATGTTTATGAGATTTGCAAGTTTTCAAAGCTGCAGTAGCAGTATTAATATGGATGCTTGTCCTCACACTTATAACACAATTGATATTAAACCAATTTTTTGCATGAATAGGTGCAGCAAATCTCTCTCTCACATTACACATTTTTGTTTGGCCAACTTCCCAAATTTCTTATAATTTCTGCTGCATTCGTCAAGTAAGCACGTTTATCATTAACAAGGTTCTTAAAAAATGCACTCAACCCCAAAATCATTGCCCAATATAGCAACATTAAGTAGAGATAACATTCCTGATGCAACCATTTAGGAATGAAATTTCTTAGAGAGAGAAAATCTCTAAACTGAGATACAAGAGCTCTAAGCTCAACCATACAATGGCAAAATATGATAAAACTCCATTTCCAAGATACTAACTAACCGTTTATAGGCCAAGAGACCCAACTAACTTTTATGAGGCTAAAATCATAACTACACCACTAATTCTAACAACATCAACTCCTTTCATTTTCTTTACATTTTTCCATTTTTCTTTGTTT
>MSTRG.151311.3 Scaffold932 750212-757416
ATTTCGCAATCGAGTTATCTACTTCGCAACGCACCCCCATTGACGTCGATAAACTTTCTCCACCATCACCATCACCATCACCATCACCGCCTTCGACCGCCCGGTCCATCTTCTCCGGCGATCTGTCCCGGCCGGTTCATCCGATCGGTGCAAGCGTGAATTGCTCTCAAGGATTCGAATTTTAGGAGCTAGAGTTGATGCACGGAGTCTAGATACAGATTAGAGCAGCTCTTCCAAAGTTGTGTCATCGACATTCTCGGCCCTCGGGTGAAGTGGACAAGCGTATTAGAAATTTGTATATCCCAGTGTTCTGGCCTATTGTCAAGTGACGTAAATGTCAGCAAATTGCGTGGGGGACGGGGATTGGGAACTTTCCGCCAATGAAGACTCTTTCTCTAATAGATGTTTCCGCCATTGATGATGGCTTTTGGTTGTTGCAGGAAACTTCCCAGTAATGATTTACTCGACGAACTTTATAACATGAACCGTTCAAATTATCGAAAGAGGCTCAAGATGACACTCCACAAAGGAGGACAACAGCCATCTGCGCCAAAAGGCACAATAGTATCCTCAAATCCCGAAAATACAGGTGTAAGTTACACATTTTACCATATGGATAGTGTTTGAGACCCTCTCCAAAAGAGGACTCCCACAACCTCCAACCATCCATGTGTTTGAATTTTTTTTTTGCATCTTTGATAGTGACGTGAATGTTTCAAATTATTTTGGAGACTGTGAGAGTTGTGTTTTATAAGAATCTCTATCATTACTATTTACTGTACCTCTCGTGTAGATGGAGCACCTGCCAGTGCCAACCCATCCCAAAAAAGATGAAACAGTTGATTTTCCGTGAAATGCATGCATTCTTGGATTACAGCAATACATAGGATTTTTGTATAGAAAT
>MSTRG.46984.1 Scaffold2123 122856-179897
ATAATAATAATAACACCACACCTTATTGTAAATAACCTTCATCTCAAATTCAAAGTTCAGATTGAACACCGATTTAAACAATATTCGTAATAACTAATATTAGTTTTCTCACTACTAGCAGATTGTGCCCCAAAAAATAAAATAAAAACCTGTATCCTTGAAGACCCAGTATACAAGTAGATATGAGCCAAGAGGTTCATAAATCGTTATTATCTCAACACCAATTTTGTCCCAAAGGGTAATCTTGTTTCCAAGTGCTGCCTGGCATGAGTTCTAGCCAGCTGTTGCTTGTCAGGATCTTCAGGTGCCCATTTATTTGGATGGCTGGGATCAATGATTATCTCCTGAAGTGACACAGTACTGCCAAGTATGTATGAGGCAATCTGCAGATCAGCTTTGCATCCAATAAATCCATTCA
>MSTRG.76561.1 Scaffold3106 102471-102925
TGAGGATCGTTCAAATCTTACAAGACATAGCTGAGGGCCACAGGTTGTACAAATCATCAGCAAATCACCTATACAATGAGAGAACACATGAAGTAAATTATATGCTTATTTTAAACATCTGAGCGTAAACAACACATGGAGTAAACCATATGGGGTAAAGTAAATTTTGCCCTTTTTTCATTAACTTTTTTTTTAGTACTCTTTTAGGACTAAATGAAGGGCTTGGGTGTTTGTTTGAGCAGGGAAGAAATGACTTTGAGATATATGACTCAGAGAGAACAGTGGGTCACACAGGTCAG
>MSTRG.149964.1 Scaffold91 540065-540814
AAACAGGATAGGAGACACGGTATGGTCGTGTCAGACTGTTGTAGCAGACAGTTTACGGGGTCATGTCGGACCGATGTAGCAGACACTGTGTGGTCGTGTCAGACCGTTGTAGAAGACAGTTTATGGGGTCATGTTGGACCGATGTAGCAGGACAGTTTACGGGGTCATGTCGGACCGTTGTAGCAGACACTGTGTGGTCGTGTCAGACCGTTGTAGAAGACAGTTTATGGGGTCATGTCGGACCGTTGGAGCAGGACAGTTTACGGGGTCATGTCGCACCGTTGTAGAAGACAGTTTACGGGGTCATGTCGGACCGGTGTAGCAGAGGTTGTGGTGATGCACAGTGCGCCATGAGCGACTTATACATGATACTGTGTATAACCCCCCCTCAAACTCAAATAGGTGTGAAGATAAAAACCTATTTGAGGTTGAAAAGGGATTGATAAA
>MSTRG.58248.1 Scaffold2445 1138635-1140541
AAAAAATTTATTTGGTTATGAGTTTTGAAATTTTTTGATTGGAATTATAATTCCAATACACAACAAAATGCTGCCGAAATCTCTCCACAGAAGATTCTAGGACTTTCGTTTTACCTAATTCCCCTAGTAATAGCTAAAAGTGTTGAACTTCAAAAGCAATTGGCCATTTTCTGGAGGTAACTCCTTGATTTTTGCTAACCCAAGGAAGGGTCCCTTAATTATGTGGGACACCACAAACCAAAGCACATAAACAACCAGAGAAAAAAAACAATGGTCAAGAACAGTTATACTGTTGATTCTTTGAATATTTTTATAATTAATAATATTCACTAAAACCGTCAAAAGGGCCGCAACCTTTATACGCTAGATTTATACAAGTCATTACAAAAAGGCATCAACAAAACTAAGATCAGCTATAAAATCTACAAAAGCAAAGGAGGATTCACAAAGCTTTTCTTTAAGCCAAAAATGAGAACCATGAATCAATGACATCTTTTTCCTATGTAAGTCCATCCCTACATAGCCTCAAAAAGGTGCTGCTTCCTCTTCTTCCACAAATACCACGTTAGGCACATAGTGATGCAAATGATAAGGCAACTCCTTTTGAAAAATAATACAAAAGAAGAGGGAAACCAAATTCAAAAGCCTACATTATTATTTGGCAAGATTCTACCCTAAAATTAGCCTAATAATGATGTCTACTACATTCAGCCATTTTTCAGCATGACAATGTTGAAAGTTTAGCCACCAGCCACCAATAAAGTTCAATTTTCAGCATGATAATGCTGAAAGTTTAACCACCAGCCACCAAGATTTTCCAAGCATTATCATTACTTTGAAAATCTCATTAAAGTGTATCTTTTACTTTGAATTTTGCATTTCAACTATTTGTCTTCTATTGTATTGAGAGGCCTATAAATATGTAAGCTCACAATGTATTGAGGACAACTTGAAGAAATAAGAAAGCTTTTCTATATCTCTAGATGTGTGATACATCTCTCTTTGGGTTTGTGTGATGCAACCCTAACCCTTGGGTATGATTGTTCTTGAACCTAGGTGTGATTGCCTAGTTTTCTTGTTTTATCTACCATTTCATTTCATTATTTTTACTACAATTTTCTGTCTAAAATCCGGCCTGTTTGTCTGTCTCTAAACCCAAATTTAAGCTCTCCAAACTCTACCTTAGAACACCAAAACCTAGTCCCAATCTGTCCTAAACCTCCCATAACATTCAGCCTATCTTCTCACTTCATTTAACCCTATTTTGGTACTGAAATTTTAAAGATCCTGCATCACATAGGTGGTGCCATTTTTATCCTATGTAGTTAATACAGACAAAACGTGTAATAATTAGGCTCATACTATAATTAAGCTGGTCCACAGTGAGGATATTATATAATATGGCAGTCCATGAAAAAAATAGTTTTGCAAGGCATTTGAGAGCACCACATGCTCACAACAAAGGACAACGAAGGATACATTAAGAGGGGGATGAAAAATAGAGGACCTGTGTAGTCACTACTAAAGATTTTGTTTTATATTAGGGTACATGTGCTTCCTCTCTCATGCAATGAGCACACTAGCAAGTAGCTCTAAGACTTAAATGATATCGTAGTTGTTCTGGTTTATTCCAAT
>MSTRG.102646.1 Scaffold4273 1412528-1443715
CATGAAATAATAATTGAAGAAAGTGTGAGAAGATAGAGATGAGAGGATAGAGAGAGAGAGAGAGAGAGAGGCACAAATGTTTCTGTTAATTGTACATTTATTACATAGAGAAGGCACTCTATTTATAGAGGATGCCTTGGATGATTACCCACCGAAAGGTGCTAACACTAACAATTAAATATACAAGACCCACCGAAAGGTGCTAACACTAACAATTAAATATACAAGACTAAAGCTAACACTAACAATTAAATATTAACACAATGCTAAT
>MSTRG.16667.1 Scaffold1354 81125-81834
GACTTTTCAGTTACCCTGGCTGCTGTTTTACTTGGTGGACACATATGTGCACACACAAAGGAAACTAATAAATAGACTCTTCATTTATATAATATGATAACACAAAAATCAGTCTTAAATAGATGACCTCAACAGCTTAATCAACAATAATCTTATATTTTACCATATGGAATGAGGAAGGAGTGATCAATTGACCAAGGATCATCGCATACTGGACCAAGAGTCCCCTAACTATGTAGCCAATTAAAGTGCCTTACACAACATCAACCAATGACAAAGTAAGTTAAATTTATCATCAAGGACTAAATTAGCCATCAGACAAGCAGGACTTGTTGAGAAAGAGAGTGGAAAACTACTCAATCTGCAAGGTTCAAGACATGGTTGTGATCTTTGATGTCATGGTACCTTAACTTCAACAACAAACTTGATAATAGAACAAATTACCTCTGGTGGTATGTCAAGATATAATACCAAATCTGGAGC
>MSTRG.123587.1 Scaffold596 590201-608326
tacaattttaccacggtttggttcggttgttctgttcgtattcgtacgttaatctccaggttttgagttccgttcgatttctcGTATTGAACTACCCTTAGCAAAACCAAACATGGCATGAATTAAATGACCAAAAACAGAGTTTTAGCATATTAAAACAAAGCCTAAAGACCACTTAGATGGCATCTAAATGACTTAAATTCAAGGGCATGCACAACGACCAAACATGGAGCATAAGGCACA
>MSTRG.95381.1 Scaffold395 1063700-1065515
GATGCCACTTCCCTGATGACTTGCCAGAGGTAGTTGGCCGACCGTGTTCCCCTGAAAGCAATGAGGGTTCTATCTTGTTGTTGACTCCCTTATTTTCAAGGTTTATTTTGCAACTTTAGCTCTAGCCTCAAGAATTCGTCACAGGTATCACAATCAGGGCTTGGTTTGTAGTGTTTTACAGCCCTAGTCGAAGAATTACTAATCAATTCTTGACCTAAGTTGCAATATATTATTTGCTAAAAGCAACTAATAGATAACATATGA
>MSTRG.141555.1 Scaffold7994 274060-316202
AAGACGACCACGATGATAATGAAGAACATGTGGTAATAACTACTATTTGAGAAAACAAGAGAAACACCAGAAGAAATTGATAAAGAAACATTAGCCAATTCATTTTATTTTCTTATAGGTAGGATTCAGAGAGATATGAAAAGGAGAGTAAGAAGGATAGTGGTTTGATGATGGAGGAGAAAATGTATTATTATTCATTCTTGTGTACAAAGCTAAGTCTTTCTATGGTGGTGGTGCAACAGCCCAGCCCAGCCCAACCAGTCAAGCACGGCAACTATGTAATTGTATCCATCAGCCATCATGCCAAACAAAGCTGGACTTCCTCCATCAGCCATAACTTCCAAGTTGGCAACAGTGATTCTTTGTCTTTAGTTCCAGTGGTCCCAAAGCTATTAGTAATGGTTTTCCATAAACCAATGAGCAAATTACATCGGCAGTCCCTACATAATACCCCTTGTGTCATTTTGGTTTGAGTAATTTCAAGTAACTTGATTTTTTGAACCCTGAATTTTAGATTGTGTTAATTTAGTCCGATTGATAACTCTGATTAGAGTTCTTGACAGAAAAATGTTGCTGAGCTAGTTGAGGTTAACTTTTTAAATTGAACAAGTTTATAGCTTTTTGTCTATAAAAGCATGACACTTGCCGCTCATCATGTTCCCATTTTTCATCAAAAAGAACTAAAAATTGTAATTAATTGGGCCAAATTGAGACAAAATCATAAGTTCAGGTCAAAATTGAGTCCATTGAAATTATAAAGACAAAAGTGACACGAGCAAAAATATAAAAACTACTAACGTAATTTGCCTGAATCAATTAAAAGTTGGTAATGCCTTGGCTATTCACAAAGCCAGTAATGGAACATTTTGATACTACTTTGCTATTTTTATTGAACTTTGCATAAGCTTTAGATTTATCATTTTTTGTTGTCTCACAGTTTGAAATATATATATATATATATATGAATTTACCAAGATATTATTTTTCACAATTTCTTTAATGAAATATTAAAAAAAATAGACTATTTGGATTGTTTACTAAATATATTTTTTAGAGTACAAGGCAATAGAAAATGATGAATCCTATGACATAGTTCTTTTAATCAAATTGTTGAGTTTGATTTTGTATGACGTAGTTTGTTCAATTTTTGCAAGTAAAAAATATATTTTTTAAAGTAAATTAAAATTGTTTAAAAAAATGTTGTTCATATTTTAATAAGAATGGTAAAATTAGAATAAAAGATATTATTAAGGAAAAGTAAACTTTTTTAGAATAAATTTTTAAAAAAATAAGATTTAATT
>MSTRG.65399.1 Scaffold271 536397-555875
GGGTGAGAAGCTGCCACGTGTGTTCTACGTGTGATGTCCTTTGCTTGGGCCTCACACATTGGGTGGGTATGAATAATGAGGTGAAGTCGATAATGAAGCACCAAAACGAAGTAAAGGAGAAGGAGCGTAGCAAGTAAGGTTTGGGAGAACAGTGATAATAAGAGTAATTTATATGGGTGAATTATATTATACCTTGAGCTACCATATCATGTTTTAAATATGTCTTGAGTTACCATAATATATTTTACGAATGTTTTGAGTTACCACAATTTATTTTATATAATTTATGTTTTATGGTTACGTTAATGTTTCAATTACGTAGATTATTTTCTGAACTCTATTTACTTAAATTGAAACCCATGGATATGTCTGTTTAGCTTTTAATAATTATTTGACAATGATTTTGTAAATAATTATTTTCTATAAGTACCACCACGGGAGTTCC
>MSTRG.63082.1 Scaffold2613 2816715-2819112
ATTATTTTTATATGACCTTTTGTTTGTCCCATGTTAACAGGTTGTATACTAATAGATAATCATAAAATCCAAAATATTCGGTTGGAAAGTTTAAGGAGCCATGTTGGGCTGGTCTCTCAGGATACGGGAAACTTGTCAAAGAGATCATTCCATAGTAATGCAAAGAAGTTTGAATTTCAAGCTGAGGTGTCTCGGCTTATGGACATCATTGTCAACTCACTTT
>MSTRG.87569.1 Scaffold3580 1142301-1154452
GTAGGATAAGCAGTAGATATATATTTCGGATAAAGAGAACCATAAGATTGCAATGTTCTTAAATAGTATTTCTCCCAACAAAAAAGAGAAAAATCATTGAACAAATAAAAGAGAAGATTTTATAGTAAATAGAGAGAGGGGTGAAGATGTTGAAACTGTTTAAAACTGCATAGCAGTTTGAAAACGTGGGAGGTGAGATTGGTTG
>MSTRG.57582.1 Scaffold2423 485127-486228
ATAGCACTATAAAATACATATGGACTATCAATCATCTCTCTCAAGGTTAGACGACCATCTTTATCTGCATCCGCCTGTACAAATGTAAAATGAACTTTGAATTAGTCCAGTAAGGCACACATTCATTTCCTACCAATATAAAGAATGTCTTTAGAACAGATTTGATAACATTATGTTGGTATAATGAAAAAGCAGCAATGAGTCCATGCCAATCCAGAACTGCAGCTAAATGAAATGTCATTGAAATTATATGATCTCCTTAATCCCATGTGGCTGAACAGTGACAGCATCCAACATTGACAAGAGATGGAAAAATAAACAAATGTTGGAAAAGTAGCATGCCCTTGAGGGCATTTCTTTATTCCTAGATGGCACAAATGGTATGAAGAAGTGCAACAGGTTGCATTGAGCGTTCCTATTTACACATTTTTAAATAAGGTTTTTCAGTTTTCTTGAGTAAAGCATACTAGTGTATGATATAAGCACGTTTTGTCATTTTTTTAACTTTAATTTCTTTTATTAGTTAGGTTTTCTAATTGGTCAGGATCACATAAATAAAACGAGCATGCTATTTCCCATAACAAGTGTAACTGTATAAAGATAAGTAATACAATGTTTTAAAGCCTTTTCTACGCTCATCCTGCCCCTTCCCAATAGCCTCGAACAACTACATCAAATAAAGCTCAAGCCTCCTAGGGAACGAAATGGATAAATCCACTGGAGAGCTGATGTGTATGCCCTTGGGCCTAGGTTGATTTTAACATAAAGCAACCAAAAGAATAAGAATAACAGGGGAAGATCAGGTTATGATAGTGATATCTACCATGAAAACATCTTCAATGCAGACTTGTTTAGGAGATAGTTG
>MSTRG.14465.1 Scaffold1298 911104-931898
GCGCGGCTCTCTCTCCCTCTCTCTGTTCTCTATTATTGCTTAATCTTTGAGTTTCAAATGGGAGTCCTTAGAGTGTGATTTTGCAAAAGTTTTCTAAATGAAAGTCGGAGAGCTCGTTATGATCTTCGCAATGGTGGTCTCGGATTCATGATCGGGTGACGTTTGCATTTTCAGATTTGCTTTTCTTCATATTTGAGGGCTTACCAATGCTACCAAAACGATTGGCGCAGTCATCTCTTCAACCTTCACACGAG
>MSTRG.44128.2 Scaffold204 346227-367614
CACAGTTTGTTGGTAAGGTGGAACAGAGGTGTTCTGGAAGTGGGCAGCATTGTCAGTGCTCAAATGTGCAAACAGAGGCTTGCAGCAGCAAAACAGCGGCTTTTTGAGTGGAAACCGAGCACGTGTATGAGCCTCCCTTGCATTTTCAAGCTTATTTAACGTTTAAATATCTAGCTTAAATATGTATTGTAATTAATTAGTTGTAACTAATTAAGAGTTGTAAATAATTAGTTAGTTTAACTAGTTATTCGGTTTCGGTTTGTAATAATTAGTTAACTAGAATAGTTCATTAGTTTTGAGTTTTGTAATAATTAGTTAGCTTAATTAGTAAAGCTAGTTGGGTAGCTTATTTATTCGGACCCTCATTCGCAAGGGTGTAATGTTGTAATAAGTGTGCGTGCACGGGTGTATGTCTTCTAACGCCACGTCTTCTCCTTTTTATTTAATCGCTTTTCATGGTTAGATTAGGAGCGTCATGTTTCAATAAGCATATCGCATGTTTGCATCCATTCATTCGTATTGCATGCACCAAGGCTCAGCGCATCATTCAAACCGCATTATCATTTCAATACTTATTTGAATACGTGTTTAACTGCATGTTATTTAATCGATCCATATGTCATATTAGTAACCGAGCCTATTAATTGTATTCTTCGCATGTGTTGCATTAGGCATCTTAACATAGTTAGGATCATGCATCTTTCTAACTAGTTTCTGTTTTAACTTTGAGTACTAGGTGAGTTTTTACGCTTTGGCATACTTGCATAAACGTGAATGTTGCCATGATTAGCATGCTTGCCATGAGATTATGTGCTTAAATGCTAAACTGCATGGATGCTTGTGAATGAAGGTTTGTTGTTTGAATTGGAACGATTCAACAAATGTGCGTTTTAAGCCCACTTTGTTGTGTAGCAAATCAGTTTTAAGCCCACTATGTTTGGTGGCAAATCCGCAAACTTTAAGCCCACTTGAGGTGGCAAATTCAAACCATTTTCGCAAACAAATATGAAGTTAAATTGTTCAAATTCTTGCAATTTTAGTCTATACTTGCTTGTGCGCATCACATAGTAAAGCTAGCTTAATAACCAGAATAAGAACACATAATGTTTACAAAAAATCATATCATGATTAGTAGAGGCCGATTATTGATCGGGCGAGCGGAGATGCTTAATTCATGACCTTCCCCTCTCGTACACAAGTTCCCGAACTGAGACAACTTTGGTGATGACGGACACGTGGCCTTTGACACGAGTCAGGGTTTCCTAAATTTTTCAAAAAATAATATATTTAGGTGATGACTCTGTATCTAGCAAAGTAATCCAATTTTGACACTTTTTAATTCAAAATCAATTTTCCAAAATGATTTGCCGAATTTGGACTCTTTGGTGTTTATCAGTTTCACATTGCACTTGTGAGATTAGATTCAAAACCACGGGAGTCCGAACTGTGAG
>MSTRG.154867.1 Scaffold982 1771701-1772918
ACCACGCCGATCGCCCATCGTCGCCTCTATTAGTCTTGTCGATCGTCACCGCCAGTAGTAGCCTTGCCGGTAACCGCCACATCTTCTTCGCTTGATGATTTGCCACATTGTGCACCAAACCTGTTCGACGAAAGTCCTCTCTGAAAATTCTTTACTATCTATCTAGTTTGGGAGCTTTTTAAAGATGTATGTTGTGAAAGGAGATGGGC
>MSTRG.30162.1 Scaffold1689 2328516-2339546
CTGTTGTGTACCATGGTATGTCACTCTCTTTTTATTTCGTTTCATAGTATTTCGTGGTACTCTTTGTAACATAAATAATGTGTACACAACAAGTTAACATAAATAATGTGTACATAACAAGCTAAGCAGTGCACATTATCTGCCGGACCTGCCAACAATTCATGGTTTGTAGATATAATGGAACAGAATAAACATCAAGACTCTGCGCAGGATCCAAGAAGCACTGTCCACAGTTGATAACGATCAGCCGTCGTCGCTAGTGGCTGTTGCACTGAAGGAAAAGCGGTTGACATTTACCTGGCTTGATGGGGAAGCCCAACAAGTGAGTGTCATCTTTTGTTTGTCTGGCATGTCAATGTTTTCCAAGTTTAGTTGTAGTTGAATTCACATTTGTAGTAGTGAATGGATTAATTACTTTGAGGGTAGTGTATGTGATGCTGTATGTATGGTACTTGGTAGGAATTTATTCTGAAATTTAATCTCTTTGTCGAACTTAGTTGGGATCACTATTGGCATTGGAAGATTTTTGCCAAAGTGCCAGTATCTTAATCCAAATGGTGGCCTAAGTTGGAAAAGGTGGTCAGTGATTATTGCTGTTATAAATTCTGATAGTGTTATACTGCCATAAAATGATGTGAAATTATTTACATTACAAATCATTCAATCTAATAGCAGGA
>MSTRG.18936.1 Scaffold14141 16667-17321
AGCGCCCGCGAGAAAAAAACATGCGAGTCTGGAGTAAACAAGCATCCCGAGCGCTTTACAGCATCGTTGCGACTTCACCATCATCATTCGCTTCTTCATCTTCATCTTCATCTTGTTCTTTGATAGCAAGAGCCCTCACCACTTGGCGGCGATCACACCCTCTGATCCAATCTCCCCATCATGCATTCGGGGCCGTCCTCGAGTGTCCATGGTCCGCCACGCAGCTCCGCGGTGCCAAGTTCCGCGGCTCCGATGTCAAACCCGGAAACGTCATTGAAAGAAAAGGTTTGCTTTTCATTTTCCTTCTACTTTTTATTTATGTATTTATTTATTATTGTTATTATTGGTAACGAGGGAGGGCATCTGGGGCTTTACTTCGATTACCCCCCTTCTAGTATCACG
>MSTRG.145731.1 Scaffold856 1603053-1610412
GCTGGCTAAAGGCTTCCTATTGAGCTACTCCAAGGGAAGAGGCATATTGATCGTGTAAGCTATTTTAGCTGATATTATCCTGATATTCCTACTCCAATGAACTGGCTAAATGGCTTCCTATTTTACCTCTTCCGTTCTCCGCTGGCTACAATTGGAGGGTGATTGAAGGCTCTCCAAACTCTACAGTGAAGTCTCTTCCACGAAATCGATCCTCTACATCAGCGCGAAATCGATCTTCGCCTTCAGCGTTGTCTGCAACTCCCTCCATCTGACCTCTTCCTCAAGGAAGAGAATTTCAGATTCATTAGTTGAAGAGTATGGATTCCATGTACCTTGTGTATAATTTTAGCATAGATGTTAAAGGAATGAAAAATGTATCATGTGGTTTGTAATTATTTATTTGTAGCTTCACGACTGAAGCTTGGCATGTATTATTGCATTGTTGTTTTCAATGAGAGAGAGAATATGTATTATTGTATTTCTATTACTTAAGGGTAATAGATATATATATATATAATTATAATAAAAAAAAATGGATCTAAATTACAGGCTTTAGTAATGTTTTCGATTAATCAAAATGCCGGGGCGTGACAGAACTGACAAGCTATCTGTACTCAGCTGGAGGTTCCTAAGTGGAACTGACAAGTTTACAAGTTCTCAGTCCGGAGGTTCCTATATGGGACTGACAAGTTATCCTTACCCAGCCGGAGGTTCTTCTATAGAACGGACAAGTATGATTTAAGTCACTCTGTGTGCGATCTATAGCACTAATGGATGTAATATGCAAGATTAAGTATGGACTTTGACTTTTGTATACATGCTCAGAACGAAAATATGAATGTGAATTGTTTTATTTCAGCTACGACTATAGGACATCATTCATATACTCCTTTACTTTGTTATTATTCACTGGGCCTCCGTTCACTAGTTATTTATTATGTATGTAGGTGAGCAGGTGCGTGACCAGGCTTAAGTTAATGTCTAGGGTATTTT
>MSTRG.3666.24 Scaffold1076 318212-321188
GTTATCTTTTAAATTGCCTTTTGTCCACATGATCAAACATGGAAAACTTGAAACTTCTATTTAAATATTTTGATATGTAATGCTGATTTTTTGTGCGTGCATTAAACGTGTTCTATTATTGTTTCGACTCTAGAACAAGCAAATTTGTTCTATGATTTATTTAAATGTGTTGTATTAGAAACGTTCTGGAGTATTATCTGGCCACTGTCAAGATAAATATCTTGCTACAAATTCTCTCCTCCACCCTGTAAACTACCCTCTCACACCACCTAGTAAGTGTTGACATATGAATGCTTTAGAAAATTTATAATTTATTAAGGCCCCTTGTGGTTGATTTCATGTAGGTTTAGGTTTATGAAAGCTTCTAGTTTAGGGTCCCAAAAGTTAAGAAGAAACAATCTAAGGCTTGTAAAAAAAAAAGAAAGGTGGGAGATTTGGCTTTATTTACGAAAAGGTGGTCGTGGCTAATTTACAAAGAGCTAGCTATAGCTAGAAAGCTTGTAAATAAAGCCAAATCTCCTACCTTTTTTAATTTATAATTTATATTAAGGCCCCTTGCGGTTGATTTCATGTAGATTTAGGTTTACGAAAGCTTCTAGTTTAGGGTTCCAAAAGTTAAGATGAAAGATTCGAAGGCTTGTTAAAAAAAAAAAAGTTGAGAAATTTGACTTTTACGAAAAAGTGGACATGGCTAATTTACAAACAATGGTGGCTAGCTATAGCTAGAAATCTTGGGACAATATATCCTTTTTCAGATATTTTAGTGCTAATTCAAATGTCAATAGATATATGAGGATGCATTATTTAGGAATCAATATACTAAGGTTTTGGGGCTGAAAGGACTGTCAAACAAAGCTTCAAAAAGTGTCACTAATTCTTGAGATCCAGCTCTTTTAATTGAATTTGTACCATTACATATATTTTTATAGGCTTTTACTTCTGTCTGTACAAGGGCTAAGACTCCAAAGTAGGGAACTAGGAAACTTTGACCAACTATAATATTCGGGACCTAATAAATACTATAAAAATACAGAAATATAAGTTAACTCGTGTTTCAATCCATGGATAGAAACAAGGAATCCTTTATGAGTGGGGTGGTCATGCCTTTTGGCTTGTCTAGTGTGCAGAATACCTTCATGTGACTGATGAACCAAGGTCTGACTCCATTTTTCAATAAGTTTGTGGCTGATGTACTTCAATGATATTCTAATCTATAGTCACTGTAGAATTGCATGTGCAACATTGTTAGGAGGTTCTTACATTTTTACAGAAAGAGAAGCTATTTGGGGCGGTCAAAAAGTGTGCATGACAAATAGGGTGATTTCCTTGGATATGTACTTTCCAAGGATCAGATTTCTATGTCAAGGCAATCAAACAGTGGCCTCAACCGAGGAACTTGTTTGAGGTGCACATCTTCCATAAGTTAGCAACTTTCTGTTAGTGGTTTTTATGTTGAAATATATATTTTTCATTGTTTATCTCTGTGTTTTCACACTGTCTACATTAGTTCTGATCCCTTCAACCTTACTACAAGGGAGGTTGGTGTAATTATGCCAAAACCATGAGGCTTCTTGTGTTTTCTCCAAACCTCAGTAGTGTAATTTACCCTTTATTTATTCAGTAATCGCTTCAAATCGTAAGGAAACAACTATGTTTTCTTATTCCTGGTTGCTTTAGGAGTTCTATTGATAAATAAGTTAAAACTTGGGGCTATTTGTTTTTGTGTTATTAAGAAAATTTATGAGATAGAGTTTACTTAATTTGTTCATAATATTCTAGTAATATTAGGATTCAAGAGAATTGTAGAAGAGTTGGGTGATCTTGTTGTGCGGATTATGCTTCCTACACACTTCCTTTGCATCAATGTGATTCTTCGGATGTTTTCTGCAGTTTTGTATATGCTCATTTCCACTTCACTTAACGTAGCTTACTGTGCATTATCATTGCATGCTCTTGACTTACCATTTGTGGATGAAATAATTTGTTATTCCTCATCATACTTGGAAGATTTTTTTTTCCCTCAATCGTGTCACAATGCATAATTGGCTTTCATTTTTCAGTA
>MSTRG.103512.8 Scaffold4311 188319-194708
TGCAGCGACGGGTTAAGGTCAACAGTGGTGGTAGATGAAGACGACCGAGACGGTGGTGTATGGGAGGACAACAGTGAGAGGAGGGGCAGTGGTGGTGGACTCGAAGAAATTTCAAGGTATGTGTAGAAAATTCTAGCAGATTAGGTTGAGGTCCGGCGGGCGGCCAAGGCGAGGTTGCCGCCCGCCGGTGAAGCGAAAAAGACTAAGTGCTTAACCTTGCTCTGATACCATGTTAAAATTGTAGTATTATTGATTGATTGTGTATATTACAAGATTGATGTGTTGTTGATATTACAAGGCTTCCTATTATATAGGAGAGGATTTGGGAGTAGGTGAGTGTGTGTGGTAGGTGTAGGAAAGTAGGTGAAGTAGGTGAGTGTGTGTGGTAGTGGAGGTGGTGGGTGGAGTGGGTT
>MSTRG.142498.1 Scaffold810 2745690-2749433
CTTTAATATCTTATTAAACTATTACATCATTAAATTAAAAAAATAAATTTAATTTTTGTTCTTCAAATAAGAAGCTTCATTTAAAAAACGGAGGTGTATGAGGAAGGGAGGGAAGAGAGAGCGGCAAAGTTGAGGAAGAGACTGCTAAGCCCCATTTAAATAAGAAGCTTCATTTAAGGCCCCGTTTGTTTTGGGGTATGAGAGGGGGATTGGGATTAGGATAGCTGTGGGTCCCATTTAATGTGCTGTTTGTTTACAGAGTTAAGGAAAGGACTGCTAAGCCGAAGGAATTAGGATA
>MSTRG.108452.2 Scaffold4603 938487-1071274
GCAGTAATTCCCCAAACGCAGCTCCCAAAGCAGCACCTCCAACCAGTGAACCAGCCATCGATGTCTTCCAAAACCCACTCTAGTTCCAGAGAATTGGGATTGGGTTTGgtgttgttatagtgaaggctatggaacttgcaagtgaagcagttgtgaacgcgagagcagtgaagaagtagtgatggaatttctgccaagtttcttcgat
>MSTRG.19305.2 Scaffold143 211609-213895
TGTAGTGGAGGTGATAGTGGGTTAGGTGAAGTGGAGTGTGTGGTGAAGTGGAGGTAGGTGAAGTGGAGTGTGTAGTGGAGTAGGTGAAGGTAAAGATGGGAAATTCTAACAATTCAATACTAATTCAATTTAAGAAAATTCATATATGACTCTCTGTACATCTGACCTCTCCATCGATGCTGCAGATTACGCTGTTCAAAGTATCAATTGCTAACAAGATCGATCTTGGAACTGTCCTCAAGTTAAATCTTCATTCTTCTAATCAATCCTACTACCATAATAGCAAAGGAAAATACACTTGTTGACTATATAAGAAATGTGGCATTTTGTTTGGTAATTAGTTACTTTTCTTTTTTCCAGGTTCAGATAGTTACGCTGTGTTTGGATCATAGATTTGAATATGGATTTGGAAAAAGGAAAGGGGGAGAAGAAAAAAAAGTCAAGGAAATGTGAATGAGATATAAGCTAAATTTTTTCTCCATTTCTTTTTCTTTTTCCAAATCTCTATCCAAATTCATGATCCAAACCCAGTGTTCATGTTTTGGCAATTGTCTGACAGCTACCTGAAGGAATATTTGGAATGGAACTCTTCAAACTATTCTTACTTCAATATGCAACTGCTGTGATAAGGGAGATGGTTTGCTGACCCATTGAAAGTCCAGTGTTAATATAAGCTTCAACTCTGTGTTCATGTCATGATTTGCCAGTGGAGGTGATTTACATACGCGGTCAAGTTATTACCCATGAATTCCAGCTTCAATGGTTTAAAAATTTTCAAGACTATATGTCAGTTTCTTGTATATTGAAATATCGTAGAAGCACCATGTACGGTGTGATGAGGGTACTGATATTGAATGTAAATATAGTTAATTATTAGATTATGGAGAAAAAAAGTTCATTATGTAGCAAGGGCAGCAATATTTCATTCACACTTTGTGGTTGTACATTTGTTCTGCTGCATTCATCAGTTGGTTGTACTAATGAAGTGAATTATTTTTCCACAAAGTAGCAAATGATTATTTTGAAGTGCTGTTTGTTTCTGTCAAAATTGACCAAATGTTATTGTTTAACTGCAACAGACATTCAGTACTTGGTGGAAAACCAAAATAAGATTTGCAAGTTTCTGTCAAAACAAGGTTTAGGGTGTTTGAAATAAACATTAGATTTTTTAAGTTCTTAAAAAGGATTCTCAGCAGAAGTAAAAGGCAACTTTAATTTACAAAGAATGCTCTCACTTGTATTAAGTAGTTTCCAACCATCGACTTAGCAAACTGGCATGATGTTCCAGACGAATAAGAACAGCAATAGTTGCGAGACGAGTGGAATGAAACTAACCTGATCCACTTAATTAGTTGTCGGGGGACAGAAAGTTTTATCCATCCCCTTTATTACTTGCTCCAAATTGGTTTAAAAACTAAAAGATTTTTTAAATCAACAATGATTCATCCCCCTCAAAAGTCCCACCCTCACCACCCC
>MSTRG.71267.1 Scaffold2905 1455450-1457806
AACCATGATATCGAGTTTTGAAAATATTATGTGCTCTTATTCCGATTATTAGCCTAGATTTACTACGTGATGCACACAGCATACAAGTATAGATTGGATTGCCTGAATTGGAACAAAACACCTCATGTTTTCTTTTGAAACGGTTTGCTACTCGCAAGTAGGCTAAAATGCGAATTTGCCACCCTCAGGTGGGCTTAGACAACAAGATGATTTGCCACTCTCAAGTGGGCTTAAAACTCACAGTCAATGCATTATTCCAATTCAGATAATCCAACCTTCACCCACAGGCATTCAGACAGGTATATCACATATGCAGTTAGCCTCATGGTAAAC
>MSTRG.148780.1 Scaffold890 515972-536179
ATCCAAACGCCATCCATGGCTTCTATATCTTTCCTGAATTGCCCCAACTTTGGTACCTAATTGCAGAGGTCAGGGACTTTATTCAAAGCCAATCTGCTAGAAATGCCTAGAACCCAACGGCTACTGCAGACTTGTTAAGGCTTGGGTATATAAACTCGAACTTTCCTCGGGCTAGTTATTCTGGTTACACTACATGCGGTAGCAGGCACGGAACGTAGTGTAGGTCTACAGGGACCGTGGCCCCCCTTTTGTGAAAGAAGCTTGGTTGTGATGCATAGAATTGGTTTAACATGAGTAACTTCTTCTCTTACGTAGACTCCTCTCTCATTTAATTCTCATGTTCTTAATATTTTTGTTAACATAACATCACTTTATAATATAATAGACTAATAGTAGAATGCTATATAAATTTTTGTAATGAAAAGTTAAAATACTTGTAGTATTATTTTGTGATAAAGTTGAATTTATAATGGGTAGGGGTGTAAATTGGGTTCGACCCATGTCAGGCCATCTGGTTCCAACCAAAATTCAAGACACGAGCCAAAAAATTATACACATGCCCACGGATATTCGAGTCTTGGGCGGGACGGGCCAGAACATTTTAAAATTTTTTTTTTTCTGTTTTTCTATCAAAATTTTATTCTTTTCTAGTAAAAATTACACTAGGTCTTGAGTGAGCCGATG
>MSTRG.134232.2 Scaffold7026 133379-140254
CAGAATCATTATTGCAATTTCACAATTTCACTAAAGAAAAAAGGACAAATTTTAAAAAATGTTGAAAACAAAATTAGGGTCGAAATATGTGGCGTCCCAAGACCTATATTAGAAAACAAAAACATGAAAATTACAAAAGAGAACATTTGAATGCCCCAGTGGTAACAAGCTTTAATAGAAGAATTCAATCAAACTAATCTACCTCCCTCCCTGATGCTTTATCCATGACCAAGAAACAAACAATACATAACCTTCTTCTCCACCCCCTTTTTTTTTTATCCTTTGTTTGCAGCGAAGCCCTCTATTCTTTTTTCGCCTTTATAACTTGTGACCTTCATTAAATCTAGTGTACCCTGAATCAAGCCGAGCCATCAACAGTTTATGGAATGAATTAGGTGGCTGTTTTCAACCTCCCAGTTTTTTTGTTTTTTTTTTTTTTTTTTTTTTTAT
>MSTRG.125324.2 Scaffold607 322625-325384
AGGCCCTACACCATATTCTGTCCAGATTTGACACACTTTTAGGAAAATGAGCTTTTGCATCAAAGTAAAGGGAGCATTTAATGCCAGAAATCAAACCTTTTGCATCAAAGAAAAGAGCTTGAAGTCACTTCTTGGGACTCCATATGCCAGATGGATCTAGTGGCATTCACCAGGCTTCTCCACAAACACATCAGAGATCCTCTTTGGGAAGTCATGAAATGCAACCTTTTAATCGGGGTTAGAAATTTTTTGGAGAGATGCAAAATATGGTC
>MSTRG.130308.1 Scaffold660 288879-289211
AGTGTGTATCATATGCGATACATACAGCTGTGGGATGCCCGTTGCGACAGTATTGTACACGCTGACTGGAGCGATGGGGTCCTCCCCTCTCTCGATCCTTACATGTTGTGGTATCGACGACATACACATCTACTAGTCGGTAATCCGAGCCACCTGTCTGAGTTCGGATATCAGGGAGTTGGGCCTTCTCTCGAGGCATTGGTGGTTCGAGCTGGGAGGTCATATCACTTGGCTAAGGAC
>MSTRG.48944.1 Scaffold2166 392543-393663
CCAATGGGAGCTGCTATATCAGTTGCCAAAGCTAAAAAATGACAGGAATGGCAAAGAGTTGTCTCCAACGGTCTGCTATTTCACTTGCCAAAGATGGCAGATGCCATATGTGTTCTCAAATTTGGCAACCGAAATAGCAGATGCCAAGCTTGCCAGATCAGCAAAAATCAACACGAATTTGGCACCAAATTCAGTTAAAAACAACAGAATTAATCCAGTAGGGAACCCATACCAGATTAAGAAAAAAAATTGATTGGAGGTGAACAAAAATTGGAGATCCGATTTTAAATTGAATTAAACAACATACCAGATTGAATTAAATTGAACAAAAATTGAATTAAACAACACGAATTTGGATGAACAAAAATTGATCAAAAAAAATAATTAAGAAAATTTGAAAAAAAAAATACCACATTTAAATATGTAGTGAAGATCCGGTTTGAATGGATCCACAATTTTGAGTTTCAAAAATCGCGATCACCTCAGATCCACATCAACAACCAGAAATCAAAACATATATATATATATATATATGAGTATGTATATAGATAGAGATCGTACCAGAGACACAGAGTTTGAAGATCGGAGGTGAACATTGAGAGGGAGACAGAGTGAAACCAGAGAGAGGGGGTTCCGATCATGGAGGAGAAGAGGTTCCGATCATGGAGGAGAAGAGGGAGTGGTTTGAGAAGAGGGAGAGAGAGTGAGAGACTGGAAGGGAGGGAGAGTGAGAGACTGAGAGAGGGTGGATCATTCTAGATGTCTGGCTTTGTTTGGTTTGTTTAATGGGAGACAGAGTGAGAAGAGCCGTGTATGGCTCTGTTTGGATCATTCTAGAGTGGATCATTCTAGTGTAATAAAGAGCCGTTGGGCTCTGTTTGGTTTGTTTAACACAGAAAAAAAAAATTAAAAATTATTTTTTACAACAGCTCTTTCAAAATTTAAATTATTATTTTTTTT
>MSTRG.109067.1 Scaffold466 180852-207595
TGTAAGTTGTGATTAAAAAAAAAAAAATTTCAGCCTTGCTAGTTATTTTGCAAGACTATAAACGATGCTGAGATTGACTCAATGAGGTCTAGAAAGAATTTGTAAAAGAAAAACAGTAAAGAGGTCTAGATTAAAAAAAGCCAGTTTTAAGCCAATTGGTTTCTTTTTTTTTTTCAAATATTTGGTTTTGGAACTAAATTAATTCAGTAGACCATCTATGTTATTAGTTAGTCATCCTGGAGTAATGAGTGATGGCATAAACTTACTTTATGCTTGAAGTAGTTTAAACATACTTTATACTTTTAATTGGATGATTATGCATTTTATGCTTGAAGTAGTTTAAACCTACTTTATACTTTTAATTGGACGATTATGCATAATGGTTACCTCATAAGTGAAAAAGAAGGTGGTTTCACTTTCAACCCTTAATGTTGGGGAAGTGTCCTCTTAAATGTTGTTG
>MSTRG.29218.1 Scaffold1668 315688-319172
CGACGACTGTACTTCACTCTCACTCTCACTCTCACTCTCACGGCAGAGGTATGCCTTCTCTTCCTCTCCCTCTTGCCCTCTTGCTCTCTTGTGCCGCCGACTACACGCCCTCGAACGGTGATGCCTCTTCGTGTCCCTCTTTCGCACAGTGAATCATGAGCAGCGCCGATCATGACCCTCTCTTTGGTCGCTACCCTCTGCCCTCTCTCTGTTGGTCGATTTTCAAGCTGTGGCCTTTCTATCTTAGATTCAAGTATGATTTTCTTGAAAGAAGGCACGGAAGGGTTTCTTCTTGCGAGTCTTTGATTCGATTCAATCAGTTTCTAGAACAAGGGATGTGGAAGTTACTGAACCCCTGCTTCATAGACCTCAACCTCCTCCTGCAGGATATTTCCCATGTAGGAGTGTGCTTGTGGAATGCATGCCTGTGGAGAATGTGGCCAACTTTTGTTTTTGTTATCTACGGAGAATGATGAGAAAAACATTTAATTTTGGTTTATGTTATTTTGAATTATGAACAAAATCATGTATTTAAACATTAAACATGTATTATGGAACATTATGTAGTTGGATAATTTTGTTGATGTG
>MSTRG.74370.17 Scaffold3000 357785-364824
TTCGCCATTGAAGAACTCTCTCTCGAAAGCCCCTCTCTCTTTGTTTCTTCTCTTCCTTCTTTTCTTCTTATTTTACAATCTTAATCTGCTCCTAGGGTTTGGATTAAGGCCATAGAGTTTGGATCGATGGATTCATTATACATCCCCTGCGTTGAGCATGCGAAGCAATGGCTTTCCAATTCCAATCATCCAATCGATTCCGATCCGAATGTTACTTATGCCCGTGCATGGCTCCATGGTGCCGGTCCAAGTGGAAGGTTCGGATGAGCAATACCAGCAGGAATACTGTGTAAAGATCACAATTATTATTCAATGCATGTTATGAGAAAGTTGTGTATCATGCGTGTTTACTTGTCGAGATGATTCAAGTTATGTCTTTTCTTTTTTATATTAAAATATTCATACACACACACACACATACACACATATATATATCTGTTTTATGCTTTGTCTCCATGCTTGGCATTTAGCCATGATGTTAACAAGTTTGGGATTTATGCCCATGAAGCATTGAAATCTTTTTGACTGCTTTATGTTGTACTTGTTTTGAAGTCATTATTGAGAAGTAGATTCTTGCAAAGTAGAAGATTGGTCCAAGACAAGAGACCCTCCTCTTCTGTGGCAGCAAGTGAATTGGGTTTTTTGAGGCAAAGACACACACAGTGGTTTAAGATTGATGATGTTGGCATGGATACAGTGATGTTTTTGGGACAGATTGATGATGTTTGTACGGGCGTAATTTACATTATATTTTTGTTTATGGAAAACATGTACACCTG
>MSTRG.25405.3 Scaffold157 1184796-1204195
AACACAGTGAAAACAAAATCTGTTTTTAATGCATCCATTATAAGATAGTGATGAGCAAGCACTCAAAAGATGTGAAAGAACTTCTCCAGAGCTTGTTTTTTTCCGTGGATCATCAAATGGCATGCACTATCTGTTGTAGCCTTTGCAAGGTTGACATTGCATCCAAATGATATTGCTGCTACTGTCTGAAATGCCAAATGCTTGAATCAAAGAGATGTCGATGCTGAAGTTCATGACAATCTTTGTTTATTGGGGCTTTTGCGAGTTTCATAGACAATTCAACCTTCATGAGTTGGTAAGGTAAAGGTGCTTATTGCAAAGTATGGATTTTTTTATTTTAATTGTCATCTCCTTACAAATACAATACAAGGATTGTTGGAGAGAGATTCAGAAAGAGGTGCGATGGACGAATATCTTTCTCTGGATAAGGAGAGAAGGGAAAGGAAGAGCTGACTCACTCAGGACTCAAGAAAATAAATAGAGAGAAAGATGAAATTCCATGAGAATTGCATTACTGCAGTGATTATAAATGGATTCGGGTCATATTTAGTAGCACTTGCTGAAAATGGCCTGAATATATATTAGGTGAGCTGACCTATGGGTCATTGTTGCGACAAAGATAAAAGTCCCATGTCATGCAAGACTGAAAAAGTAAAATAAAGGAAGATAAGCTTGGATGTGATATACATCAACAGCCAAGAAGTTTGCCTTCCTGCTGTTTAGCTCCTAATTAAACAATGATTATGATGAGAACAGAGCTGGGACAACAGATAATTATTCTCAGTCTATGTTTGGGACCCGCTCAATCATCTCAAAAATCTGAGCAGCTGCAACATTTGCATCCATAAAGTGCTTGACATTTATTAGACAACTCCCAAGAGCACTGCATGACCGTTCTGACTGATGACAGTGCTTGCTCCGCTATCCCACCAGCAACTCCGGATTCCAACAATGGCGAGTCTCCAACAGAGGTACAAAGCAGCCATTTGAGCTGTGATGAACATTGCTATGTTCATCATGAAGTTTGGAATCTGTTACAAATGTCGATGCTACATCAACTTAGTAAAGCTTCAAATGAGATTTTCTTGGGGTGGTACTTGGAATACAACTTAGTCTCCTAGTTTGAGAGCCTACTTGAGAACAATTTACTGACAAGCCAAAAGAAACACATATAAAGTGATCTTTCAGAAGGGGAAAAGAATTTGAAAAAGCTTCTTCCCAGATTGTTGATGCAAGGAATCAGGAAAGGGAGCATCCCAGAGAGACAACATTATTTAAGTGAGAGAAGTAGCAGCAGCATAACCATTCATGAGGTTGGCTAGAACTAGCATGATTGCAGACATGCATGCTCCATCCGCAACACATCCAATTGTTCCCAGTGCCATCAACAACATGTCCAACCCATCTGAGTGCTTCAAAACTGGTTACAAGGATTGGATGCACATTATGTAATCAACATTTTTAAGGCCAATATTATATTAGTTTTTGCGATTGGCGCCGCAAGAAGTGAAAATCTAAACAAGAGAAGGCTGACAACGATGTCAAAACTACTTGCAAGTCGAGTTCAAATTTACAAGCTTGAAGGGAAAGACATTCAAGGTTAGGTTTTAGTCTCTTTGCAATAAACTTTTGATCTAGTTGATTTTTGACTGGC
>MSTRG.95182.3 Scaffold393 1229874-1237766
GCTAAAATAGTGAAAAAAAATCATATGCCAAACGAAGCCATTTCATTAGTTGCTAGTGAATTATGATGATGATGTTCACTTGCATTGGTTATGCAATTGTGGAACGACTCTGATCTATATTTTGGGCACTGAATGCTAAAGATTAGAAGAAGAATTTCAAGATGAATGGCAAATTTGATTTTGTTGGGGATGACTTTTGTCACATGGTGCTGCTTTTCCTAACTTTTAATTTGATGTAGCAGTGTGATTAGCCTTTGTTTGTTTATTATTTGATTTCATTATTGTAAGGTTTTTTTTTAGTGTTTGGGATTCACAAATTTGTATTATTGCTTGGCAGATTTGATGTAGGGATGGAGGACAAAAATGCCTGTAAATTTTGAATTAGTCATGCCTGGTTTGCTCGTCTTCCCCTCCTATGTTTGTATCTCAAAATTAACACTCTCCTTTGTCCTCTTTTGCAATCATGCTCGTATCTTTTTTATTTTTCATTTTGTTCACATTTTGCTTTCCTATTAGTTGGACATAGAAGTTCTAGCCGGACCTGCTGATAAACTGGTAGCCGTGTATGCTAATTCACTTTTGTTGTTGATATTTGTTTTTGGGTTTTTTGGTGGTGTTTTCACCCCCCACCCCCTACCCCCCTACTTCCCCTTCTGTGTTCTCTGAGTTTTATTAGGCAGGTGAGATGTACTGCCATCCACACTCGTATGCAATTTTGTTAGCAATTTGCTGAAGGTATGCCCAATTATATCCCATTCAAGTCATGGATTGCGAATCATTGTGTAGATACAATTTCAGGCTGATTTAGAGGATCATCAAAGATATCATAATTTGGAATATGAATTCAAGAATTCGAGATTTTCTTCTTGAAATATGGTTTTTGGATTTTTCATGGAAGATTACTCGCTCTAATACAGTGCCTTTGGTGAGGTGTTTTGTTGGATTCTGGTCACTTTTCTCTGACAATTATTATCCAAATTTTTCCTAAGCCCTAAATTGCAGTTTGTGAATTATTACGGTAAAAATTCCACTTGACGATGCATTCAAGTCGGTAATAAGCTATTTGTTCTCTTGGATTTAGGGTTTGTAGTATATATAGGGTTTTGTCCTGGATATTTTAGGCTTTGACCATGTGTTCTATATTCAGGTTCAGGTATAAAGAGTTTAATTGGTTTTTGGGTTAGTAAGCTTTCTGTTTATTAATTTGATTGATGATTGATTCAATGTAGGGAGG
>MSTRG.60364.15 Scaffold2524 769002-770058
TGCTCTTACTCTTCAATTATGCGCTATTCATAGTTTTGGAATACAGTAAAATCTAAAATTTCAGTCCACTGCTTTAAGATGCCACTTCATCACAGAAGCTTTAAGACGCCACTTCATCACAGAAGCAGAAGAAGAATAGAGTCTTATCCTAGAGACAAAGCACGACATCAATGAGATGGTAGAGGAAATCCTTGAAAAATTCCCTAATGCTGCCTCATTTGATGAGAATGGAAGAAATATACTACACACATAGCGGCACAGCTGAAAGATCGAATTCTCTATGACCACTTAAAGAAGACTCTTAATCACACAGATAGAATGATGACTGATGTTGATAATCATGGGAACACTATTTTGCATCTTGCAGCCTACTAGTACGAAAAAGATCATTTTCCTCAAAATCTTTTCGGAACCCCGTAAACCGAATGACATCGAATGTGTTTTGGTTTAAGGTACTCTCCCTGAGCTTTATATATTAACTTGCAATACTAGTGGTAGAGAGCTAAGGATCCTCTACAGTAATTTTTCTACAATGATTTTGTGCTTTCAATTATAGCAAAATACACTATAACAGCTTGAGTTTAAATTAAAGTAAAATGACATTGTATCACATTTTTTTAAACCAC
>MSTRG.58383.1 Scaffold2449 882670-885295
AGCCGATTCAATTTCCAACCCAAAGCATCGTGCAAACTTTCTCTCTCTAGAACTCTCTCGTTGTCTCTCTCATCACATACGATTCCTCATTTCCTCTCTGGCATTTTTCTTCAGATCTCAGACGCATTGAATTGATCAGAATCATACAATTTTGATACATCTGATCTCAATTTTGGCCGATCGGGATTCAATTTTGTGTGTGAATTTACATGCATAGAGATAGAGAGAGATAGAGAGATTGATTTTGATTGAAGAAAGCAAAATTGCTTTTTGAGAGAGACAGAGAGTGTGTGTGTGAGTTAGGTATAGAAAAATAGGCGCATGAGCTGTTTGGTCAATCTGGAGTTCTCTTCTTCGAATTCAAACCACTTCATAACGTGCCTTCTCGTTTTTATTCTTCATTACTCACCTCAATTGCCTCCTCTTACCTTGTTTAATTTTGAGAAACCCTTGGAACCTAGAGCGAACTTCTCATTAATATCGTTATTATTGCTGTTGTTAAGTAATTTTAATCACAGTAATCTCTTTAATCATTGCCGATCGTCGTCTAATCATGGAGTCGCGAGAACAGAGTAATCGCCAATTAACCAAGGTTCCTTGCTATTCAAATGTTGAGAGGAGACATGGTGCCTCACCCTCAGTCA
>MSTRG.96453.1 Scaffold399 3717645-3731209
GGGATGTTGAACTCTGAAAATTCTACAAAAGATTAAGCCGGCTACAAAAATACCTCTCCTAACAAAAAGGTCAACAATGCCAAAATCATGCCTTTCAAAGGTGCTTGAGAATTCTTTCCGCTCAAATGGAGATGCAATTCTTCTGTCTAAATGCACCACATAATGCATGAAAGAACTACAATCCAAGCCTTTTTATTCCCATTCCTCAAGACAATCTCTATGTCAACGAGCAAGAATATCACTCACAACAACTCACCAACCTTGGCATCACTCCCGCTATAGTCTATACCAAACACCAAGATAACACACCCCAAACCTGAGATGCCACTAGACAGTGCAACAAAGGTGATTCACGACTCTTCTCAAAACATGTAACCTGGAATTTTGGAAAATTAAACCAAAGTTTATCTTTTCCGTCTATGATTCTTATAAGCCTGCTTCTGT
>MSTRG.149769.1 Scaffold9064 425508-426868
ATGAAGATTTTATAGCATAAAAAACACTCAATATTTTCATAATATCTAAGGTCACTTAATATCAATCCAGAGAAAATTCGATCCAGAGAATTTCTCTGGACAAATCACAGAGAAAATTCCAAATTTCTCTAGACGAACACCAAATTTCTCTGAACATATCACCAACACCAAATTTCTTTGGACACATCACAGAGAAATTTTACACATCTCCAACACCAAATTTCTCTGGAAGAGAATTTAAGAAAGAGCACAGATTATGATATATTACCACCACAGAAGAAGAGTTGACGAAAAACCTAACCCATCAAGTAAATTGAGAGAGAAAGAATTCTTCCAAAACAGCTTTCAAAAAGTACCCATAGATATCTAGGAAAGCTCTGATCAACAATGGCCTTTTTTAATTGAAAAATGTTTCAAACCCCCTTTCCCTCCCACCCTCCTTGACCCATTTCCCTCCCATTGGCCAGTTTTTCTTTTTTTCCTTCTCCTCCAATCATCAACCGCCACGTGTGTGTAGGGGGTGGTGGGGGTGGTGATTGAAGGGGGTCTCTATCAATGCTGTTTTTAATTTTCCTTTCAACAAAAGAATACATGCAGAACAATTGTAAATTTGAATGTAAACAGCGAAAGAATTGAAAATTTAAATTTTAAAATAAAAGAATTGGACAGTTATATAGAAACAATAAGGGTATTAAAAAAATGCATGACATAAGTTCACACCAAGTGAGCTGTGTGCTTTATATAATGGTATAAACGTATAGATAATAATATAGCTATTCACACCTCCCGTGAGTGTTTTAATTTTCAAAAAGTGCTTTAATTTTCAAAAATACTCTTCACATCCCATAAGTGCTGCATCCATTAATTATTGAACAATTTTCCTCATTTATCAAACTGCCCAAAATAATTAAATAATTTTCCCCATTCATCAAATTACCCCTCAATCATCAAAGAATTCAAAATTTACAATACAAAATTACAAACACGTAGCATTTACACCAGTCACTAGTTCATACATTACACATGTATGTATTTTCAACACTTGGCAACACGCTTTCTACATAAGCCTGTTCTGTCCCTCTTCCTCAGCTGCCTTGACAACTCATCATGTATATATATTCATCCC
>MSTRG.93273.4 Scaffold3831 301258-301974
AAGCCTAGGAGGGCAAGAACAAGTTCGTGGCAGTCGAATTTGATACCAGAAGAATCGATTCACTCTTCGATTGGATTGGACATCGAAAGCCTCTCAGCAGAAATCCAAACAGAGTGTCAGAATTTGGAAACAAAACATGGCGTGAAACAATGGCCACATCGGGTAGTTTTTGGGAAAGATCTGTTGTAACAAGGAAAAACCACAGATTGACAAGGCTAGAACAGTATATGAATTAGGAGAACATCCTTTCATG
>MSTRG.103712.1 Scaffold4319 823460-824692
CAAAATCATTCAAACAGATCCAGTAGGTAATCCATAAAGTAAACCACGCAGCAATAATGTATAACAAATGTAAGTACATCCAATTTGAGAGAGTAAAGTTCGTACGATCGGAATTAAATAAATAAACTTGAACAAAAGAAAGTTCTAAGGTTGAGAATTAGAACAAAAATAAATAAATAAATAAAAATAAAAAATACACATACAACAG
>MSTRG.104552.2 Scaffold435 2644362-2644918
GTAGCATGTCACGTACCGACTCATTGGGGATACGAGTTCTACACCAAGCACCTTGCAAGCGCATTAGTTTGTGAGCGGCAAGGCAGGCAGGGTAGATCCCTATCGCATCTCCTGGGTTGGTCCTTGGGCATAATGCACGGGGGTACGCAGTACCACTCGTGGAGCCGGCTTCTCGGGAGGATGACAAGCGCCCAGTCCGTGACAAGTGGTATCAGAGCTAGCCTAGGGGCACTGTGATGGGGACGGTACGTGGGACTTACACCAAGCACCTTCATTGTGGGGTCCACACCAAGGGTGGTGTCCGCACGGGGCGGGTTTCCCGTGGGTAGGGGAAC
>MSTRG.29847.12 Scaffold1685 120843-123146
AACAGAACGAAAAAACCCACCCTCTCTGTCACAACTGTTCTTCTTCTCACACTTTGCGTCACCTTCTCTTCATCGACAACCACCCTCTTCGTCCTTCGTCACGCTCCTCTTCATCAACCCTTCAACCCTTCGATTTCAATTTATAGCTCGCAAGGTAAGATTTCAATTTGTCAATTTCCTCCTTCCCTTACAACCCTTCTCGATTTCAGTATTTTCCTTAAACCTATTAGAAATTAAACCTATTTTCCTTAACCTTTTGCAGTTTCTTCATTGCAATTTCCTGGGGAATGAAACTGCAATGCCTTGATGTGCTTGAATTCTTCTTTCCTGGTATTGTCGTGTGAAGTAAAATTATAAAGGCATCAATTTTAAACTGATGTATAGCTCGCAAGGTCTCCATTATTTATTGACGTTTTCATTTGATTCATTGCTTTATTGGTTCATATATTTTCCATTTCGAATAAGATGGCCTCATGCCTTGTGCCTTGATCACACAACTACAAGAGATGGAGCAAAGTTCAACTGTATTGTTCTTGCCAAAGTCCAAGTTGTTTGGTCTCTCTTGTAGTCACTCTTTGCAAGCTGGATAGATATTTAGAAAGGTATGTTTGCCATCTTCATTCAATATTTGCCTTTTAAATATGCATGTTAGAAATTTTCTAGAGTATTGAGTACATGCTCAGAGCAAAGTACCCTGTTTGTAGGCCCAATGCTATATATATATATAGGTACTTGACCTATCCTTTTAGTAGTGATTAGCATTACCCTGTGACTTATTTTTCTGGAGCTCTATTTTGCAATTGGGAATCATTTAAGAGGACATTGAACGGTATGTGGCTTCAAAGTGATTAGTATTAACCATTTTAATGTGCTTTTATGTATTTGTTAACCATTGTATGTACTTGATAATTCTCTTCTCAACACTGTCATCACATAATTGGTTAGATTAATCACCAAGTCTTGCTCATATAAGAATGTCATCTTGCTATTTCATTGATATTTATCATTGTCAATTTAACTTAAAAGATTATGCCCAATGCCCT
>MSTRG.93016.1 Scaffold382 1287969-1289120
TTGTTGGGTTTGTCTGAGAGGAAATGAAGGATAGTTTCTGAAATTGGGTGTGTTCTTCTTGATTGGATTGTAGATTAATCCGATCAGAGATCTGCATCGGCTTGGTTGATTAAACATTGAACAGGTTTGGACCCATGAATCTACCAGATTCATCGATCTCATCTTTTTCTGTTGAGAGAGAGAGAGAGAGATTGAAAGGGCTGCTTATATACAACAAAGCAATAGATACATGCGTGTGTAATAGTATCTTTCCAGTGTAGTGATTTACTAATGGGGGGACATGTTGTGTTGGGGAGTCGAAGTCTGCGAAGTTTCATAAAGCATTTATACGAGAG
>MSTRG.8123.1 Scaffold1166 171134-216863
AGAAAATTTAGGGGAAAATGCTATATAGTTGAGTATGAGACTGAGGAGAGACATTGTCATTTTTTAAGGCAGCTAAGCTGAGAACAATTACGATGTTATTAATGAAATCATTAAACCAATGATGTGTATTGATCCATCACTATAGCCAAACTTTATGTTAGGAACAAAAGCAATTACTAACAATTAACAATAGACTACTTAAATTAGTACTGAGAAAAAAAATCACTGTAAATAAACTAATCCCTCACGGCAAGAGGAGCTATATAGGTGTGTCATATGAGAGGAGGGAGAGGAATGATATAGGACAGACCATGGGACAAGAAAGGAAAGAACGGGAAGAAAAACAAAAGAAAAGAGTCCCATCTAACACTCTATTGTTGACCTTGAACTATGTTTTTTGAAGAATTAAACAAAAATCAAGTTGGATTTTCTTCAGTGAGTCTACAAGTCAACAGTTAACATTCAACATATTCTATTAGTTAGCAATATCAT
>MSTRG.116456.1 Scaffold5226 97171-100710
GTACAAATAATTTTTAAAAATTCAAAGATAATTTTTTTGACATTTATTTTTGTTGAAGAGTAGACCTGGCGTAGCGGTAAAGCTACCCCTTGGTAACCTGATGGTCACAGGTTCGAGTCGCCGAAACAGCCTCTCCGTTTGCGGAGGTAAGGCAACATACATCAACCCTTCCCCAAACCCCGCTTAAGCGGGAGCTTCGTGCACTGGGTACACCCTTTATTTTTGTTAAACTAGTTTATATTTTCTCAAATTGATGACTTTACCCTTGAAATAGAGCAACAGTGTCTTCAATTATCCTTATTTAGAACGAGATTCAAAATTCATAGTCAAATGTATCACAACCTATGTTACATGGACTCGGCACTTTGGGGGGAAGTACCCGTGTCGACACGACACGACATGACACGGGTGCGGGTGTGGGATCTGTGTCGGATTCGCCTCTTCTCTCTCGAACACGGCTAAGCAAAAAGGAAGAAGAAGGTTGAGACACTTACATTGATGTATGGGTTCAAGATCTTGATCGTATCTTTCAATCTTCTCCGTCTTGATCTCCTTTTCTCTCTCTATCACTATCTCCTTCTCTCCCTCCATATCTCTCTCGATCGTTTTGTGCGTGTGTGAGAGAAGAGAAGAGAAAAGACAGACCCATTGTGTTGCTGTGCGTGTGAGAGAGAAGCGAAGAGGAGAAGGGCAAACTCATCGTGTTGCTATTGCTGCTTTTGTTTGTATCAAACCCTAATGGGTTGGACCAAATAAATAAATAAAAAGCTTGCTACTATAGATCTTAATGGGCTAGACCCAAACAAATAAATAGAAAGTTTGGGCACTGGTTTGTATCATAATAATTAATACTATAAATTATAATGGGCTAGACCCAAAAAAATAACAAAAAAAATTGGACCTATTGGCTGGCTTGTATCATAATAAACCCTAATGAGTTGGATCCAAATAAATAAATAAATAAAATATGTGGGCCTATTTATAAACTCTATTCAATAATAACATGGGTTATTCTATGACTTATCCACATGTTTGATCCTATTTATAAAAAAAATTGTTGGGTCAACTTTTTTTAACTCATCTTCATATAATAAATATATTTTAAAAATAACTATTTAACGTATTCCCGTACCCGTATCTACATTTGGATCCATATCCACGTATCCTCAATTTTTAATTTTAAAGTGTCCGACCTTCAGATACGCATCCGCACCCGATACCCACACCCGAGTCTGTGTAACATAGATCACAATTGAAAGGTCGGGAACTAAAATAACACAAGTCCCAAATTACAGGAACCATTAGTGTAATTCGCCCATAATTTCTTCTTGTTGATTAAAAAAAAAAAAAAAAAATTGGGGGCTACTTGCAATTTACCCCATTAAACTATCATCCTGTATCACTTTATCCCCTTGATCTAAACAACCACACATTTTAACCCCTTGATGTATTGAAAATCAAAATGGCACTAACTTGTGTGAATGGGGATGTGTTAAATTACATTTATAACCTCAATATTCAGTCACTACAGAGACATTGCTAACTACTAAGCTTTTTTTCCTTGGCTTGAGATACTGTTATCTTCTTCATGAAGCCATCATTTATTTTCCTCATCTCATCATTTCTCTTGGACAACTCATGCACCTGAGAAATCACTCTTCCATTGCTTCTTTTCAGCTCGCTATTTTGTGATTGAACTACCATGTATTTCTTTAAAAGTACTTTCCCAAGCTCCATGCTCTAATAAAAGTGAGAGGATCGAACCAAGCAAAATACCCACAACCTATCTCTGCAACCATAAAATTCACATAAGAGGACCAAATAAAGGGGGGCACTTTCATGTAACTGTGCACAAAATGGTTTGGGCTTGAATCGCTTGATTGGTGGCTGTTGCAACTACAGCTACTATTGGTTGACATCTTAATGCCACCGCAAAGAGCCTTGTTTCCAGAGAGGGGGAAATGGTGAAGTGAAAGAGACAATAAGATAGGGAGAGATAGAGATATGAAGAGAGTAAGGTAGAGAGATGGTGTTAGAGAGCACTTCAAATTCCTCTTTGGGTGAGGAAATCTGTGCAATGAGATGCATATATATATATACCATATCTTTGGCATTCCGATTTTAAAATTGCTTATTTTTTTTTCAATACAAGGCTATTTTAGGGATATCACAATATTTATTGACCATGTGCAACTCACATGTAATTTGACTTCCAAAAGTGTGAAGGCCGAGTAACAGAAGGATTTAAATGATACAAATTTACACATCAGGGGGGTAAAGGGTAATTTTTTTCAAGTCAAGGGAGTAAAGTGATAACAAATGATAGTTTAAGGGGGTAAACTGTAATTAACCCAGAAAAAAAATGGTTGCTCAGCTTTTGGGGCTGTGAAATCTTTACTATCCCCAACAAAATAACCTTTGTTAACACACAACCAGTCCTTCTGATCCAGTAACATTAGGAAGCAACCCTCAGAAGTAAAATATTTAAATAGAAATGATAAGCACACGCTTTTAGCAGTTTAGCACAAGTGGTATCCGGACAAAACTCTCATGCTTGAGGTGTGGAGGTGGGGTCCCATCATAATAGGCGATATCCCATATCTATCTTCTTATCTATACTATACAATAACAACTATGACAAACATGACCAAATGAT
>MSTRG.16.2 Scaffold1001 363448-368850
ATACCACGTTAGTTGCAATACTAGTGGTAGAAAATACCAATATAGTGAACATGGCATGTGTATCAAATGTGCAACATCACTAATTTTTGCATAGTCAAATTTCTTTCTAATAATTCACCCTCTCGCTATGTATCACAAAAAGTTTTTGGAAACCATCTCTAGCCCTTTTGACTTGTTTCACTAAATACACACCAGCTTCAACCCCACGCACATCCTCTTCAAAGAACCCTTGAACACTTGTAGGGCAAAATTTATTAAGGTTCTAGCAACAAGTCAAGCCAAATGTAGCTCTCCATTTCACCTCAACATCAACCTCTGCTTTGATTTCTTCGTATAGTGAAGGTCAAAAGAAT
>MSTRG.34393.1 Scaffold1785 24512-25363
TGCAAATCAATGGGACAGTAAGGAAATGATTGCACTATTTGTGGAAATTTTTTCCAGTGTAATTTTGACACGTATAAAAGAGTTGAACCGGACACAAAGACTTGCACGTAAGATATTGGTACCATCACAAAAATATAAATATTCTTTTACTATTCTAATGATTTGTAATTTTTTTATTTTGTCTGATTTATTATCAAGGAGGTGTATATTATAATCAAATATGATTTAGACTTGTACTATGCACATAAGATATTTGTACTATCATAAAAATATAAATATTCTTTAACTATTCTATTGATTTGTAATTTTTAATTTTTTTGTGT
>MSTRG.136467.1 Scaffold729 139560-144275
AACGGAACTTTATTTTGAAAGAGGATTTTGAAAAAAATAGACGCTGAAATTTGATGACGTACTTTTGAAAATAAATTGGGGCACATTTCGGGAAACAATAAATAACGGAAAGACAATTGTTTAGATTGATCACTCTGGTAGGAATCCTCTAAATTCCTCAGAATGCCCTTGGTCGGGCAACTATCACCCAATGGGTGATGACGATGACTTCGAGATCCAATGGTAAGTGTTGAACAAAATTGACTGGTTCCATTCACCTATCCTCGGATTTGTTGCATAGTATTCCAGAAACTATTCGTGGGTTATGTTATGTCAACAAGGCAAGCATGAGACTATGCTACTAGTGCTGTTTGATCATTCCCTTGTGGAAGGAGTGGTATATTGATAGTAATAACTGATGTACCCTCTTGTGACCAAACTCAACCCCTTTTGCATGGAGGGAGCATTAGCAGCTTCCGAACTAGGGCAGGATACCCTCCTTTCCAGGATTGTATTATTGCCTCTTTGAATGATTTAGTGAATCCTAGGTCTTGACTTCTAAATTAGGAGAGGGCGGCCCTACCCGCCCAATAGGCATGAATGCAAATTATGTGCTTATGTGATATTTTGGAAATGATTTGATTTGATTCCAGCGATCTAACAACGAGAAAGACAGTGATTTCATTCCCAAAATCTGGGGAGTTTGACGTGGCAGTGATTTGATTCTATTTCAATCCGAGTTATTTGGGGGCAATGATGAAGTTACAAAGATTTGGAAGTTCAATTTAGGCTGTGATTCCTATTTGGATCATGATTTGAGTAATCAGTAGTAATTTAGGGGGGGTGGTTTCCCAATTTTAAAGAATTTGAGTCTGAATTTGGGTTGTTACCTTAGTGATCAAAGAAGAAGTGGAAAGAGAAAGGAATGATTGCGTTTTTAAAATTTAAATCCCCAGAAAACATGTTATTAAAGAATAACTTCTAAAAAAAAAAGGAACTTTCCAGCCTAAGTAGAGCCTCGGAGATTATGGAAGGTGTTTGATCGAATAAGAATCTTTAAGTCATTGACTTTAGGGGGAATTTCGAGTTTTATAAAAAATGGGAGATAAGGAAGTGGTGACCAAATCTTCAATTTTGAATAAAATTCGAAATCCCGTAGAAAAACATTTGACTAAGGGGACAATTGTTTGATTAGATACTTGGAATTAGATCGAGAGCTCCTTGGGAGGAAAGAATTGTGAAAGAAAACCCGAGTAGAATTTTAGA
>MSTRG.119297.3 Scaffold552 322405-323804
GTAACTTAAATTAAACAAGATGAATAAGGACACATAACCAGAGCTGGGGAAACAAGGCATCGACACACAAGGCGTGAACAAATTCCGAAACCACCGATGAAAATAGCCGGCGAAGGTCAAAGGAAAGGTATCGGTGCTCCGACAAACACCCCCACTGCAGAACTTCTTAACACAACAAAAGATGACTATAACAAAAGTGTCACACCCATTGATCTGTGATTGTTGTTCTTCTCATGTCCCGAAAAAAGGTCATGAAAGACATCATGGCCTCGTTTATGTCATCAGCCACATCAACACAACCAACCCCTATTTGTGCTTGTGGCTATGGGTACTGTATTATCAAGATTTCTAGTTCTGCGAAAAAACCCAAGTCATGGGTACTACCAATGCCCTCGTGGAGTGGTGAGTACAACACCTTCAATGTTTAATTTGCTTTTAAAACTGTCACTAATACAATTTTTAACCTAAGCCATGTGTCATGCGTCAATCCTACCATTATCCTATTAAAAATTGTGACCATTTTGTTTTGTGGGCAATACACTTCTATGTTATGCTTATAAACGTCTATTTATCATATG
>MSTRG.63305.6 Scaffold2616 382394-384281
ATTTTTTGAAATTATTTTGATGTTATTGTTTCATTGAATTTACAGTTTCATTGGAAAGAGACATCAGTACTTTTGCATATTCAATGATATGCTTTGTGCATGGGTTTATTTGTGTCAATTATAGCACTTTTTGGGGCTTTTTGGCAAGTGGTTTCAATAGAGCTTTTCAAATTAAGGAACCAATTCCTGTCACTCAACTTGTAAAGGAAACTGCTGCTATTATGCAGGAGTTCACACAGTCAGAATTGTAACATGTGAGGTGCATTTGCCTAACAGATGGTTCAGATGATGAGTATGAGCCCAATAGTAGCAGTGACGATGATCTGGTGATAGCTAGTTTTTGAGGACTTTGATGAATAGATTTCTATAATCTTTGAATAGTTTTGGATTTTGTTTACAAACTTATATATGATATAGTTTTGGATGGTTTATAACTTTTGGATAATTTAGAACTTAAGGATAGTCCTTTTGGATGGTTTTGAACTTACGGTTAGTTTTTGGATGTTTGGAATGTATTAACAATTTTTGAATGTTCATAATTTATG
>MSTRG.62849.1 Scaffold2611 180446-274545
ATCACTCCATGCATCTAGTATCCAAAAGGCTAATTTACTTGATCCATTAACTTGTGAGCAGTTTCTAAAATTTTGAACTTGAAATGAATATCTGCTTTTAGAAATTCTCACTAGTATACTTCTTCTTCTCTTCTCTCTCTCTTTCTTTTTTTCAATTAAACAACATGCCAGGGTTCCAAATGTCACTCCAGTGGGAAATTACACTACCTTGGTAACAAGATAACATCACAAGGTAACTTTTCACTGGAAGAAATATTTGCAAATATAACCCTTGACATTTTGATTTTAGGTGAAATTATTTTGCAATGTAAGTTTCATTCCTAGAAGAATCATGTGCAGTAGCTATACATATTAAGGGG
>MSTRG.14337.1 Scaffold1295 1297946-1298447
ACGTCCGAGGCCTTATATCGACTTAACCCACTGTGAGTAGTAACTTTATAAAGATATGTTCAAATTATATTTATTTTCGAAACTGTTATTGTCCTCGAAATCGATATATGAATGATTGAATAATTTATTGAAGTAATACTTAACCTTAATGAATGAAGTTCCATTTGAATTTGTAATCGTGGCATCCTTTAGTGAGAGCCTTGCCTGGAGGAGATTAATACCATGGCCCATTGACCCTTGCCTGGGGGAGATTAATACAATGGCCCACTGACCCTTGCTTGGGGCAAATTAATGCCATGGCCCATTGGCCCTCGCCCGAGGAAAACTATACCGTGGCCCATTGGATAATTGAAACACAGAGATCTCTGCTGTTAGACCTTAATGGTCACATTGGATATGATATATTGATTGACCAATTGTGGTCCCATGATTGACCTATTGCCGTCCCATTGTTATTGATACATTGTTACACTATTGGAT
>MSTRG.98173.1 Scaffold4093 279328-284234
GGTAATCTCTCAAATTCTCTTCTCTCTCAAAATCTCACAAATCATACTAGTAATCTCTCAAATTCTCCTCTCTCAAACTCAACTCTCCACTCTCTCTCTCGCTCAAATCTCACTGTCCACTCTCCACTCTCTCTCGCTCGACTCTCTCTTTGATAAAAATATGAAGATTTTGATCAATTGTTGATGAAGATTTGAAGATTTCAATCTGCTGTTGATGAAGATTTGGATTGATTCATAATCGGTGCAGAAGCAACGTTCTTCAGAAAGGACATATTGGCCCTTGAAAGAG
>MSTRG.49711.1 Scaffold2184 770732-776984
CAAGATTATAGAATTCTCTCTCTCTCTCTCTCTCTCTCAAGTTTGTGTGTATGCTTGTGGGTGGGGGAGTTGGGAGAGAGGGATGGTGAATAATGAGTTTGATGAGAGCACGCCCAATTATTGTGTCCCCTATAGGATTGACATTGTTTGATTTCAGTTCAACCCAAGTAAACTCATGCCTCAGCTCAGGTCAACAACATTCTAAGAACAACATGATTTCTTGCTCCTTAGTTCTACTATCAGTAATAACGACAGTGAAGCTTTGAATCTCTTTTATTGGGTATTTAAAAGCCATTCGAATTTTCCAAACATACTTCACTGTCTTTTAGAGAGTTCTGGTTCATTGTGCTTCTCAGCTCTGGCTTTCCAGTTTCAGGTTTCGTACCAGGTTAAAAAAAATTGGAGATGCACAACCAACTTATTAAACTTATGGGAGAAATAGGCACGCGCTCGTGCGCGCAAACACACACACACACACTACTGAAGAAGCTTCTGGCAGTCTATTTCCACATCTTAAATTCATTTTCTTATGCAGATCAATTGGGCAAGTAGAGGTGGATACTGACGCAAAATCTGAAACGACATCTTGGCTCTTGGAATCATTGACTA
>MSTRG.88753.5 Scaffold3626 90027-91533
AGAAAATGTTTACCGAATTTTTTTCTCACTGAGGTGATTTTAGTGAACGAAAATTTTGGTAATTGTAGAAGCACTGTTATTTATATACCCTTTTGCTACTTCCAAATGCTTTTGGGAGTAGATAAAAGAATTTGAACAAAAAAAGTGATGCTATAGGAACAAAATAAAAACATATTTAGATTTTGTAGGGAATGATGTAACGGCATTGTAGGCCTATATCACTTCAAAACAAAGATCATGCC
>MSTRG.29778.1 Scaffold1682 279809-282339
CACCAGAGGTGGAGAGGAGGAGGTCAAGGCAAGCTTGGAGAGGGAGAGGTTGGCAGTGATAGACCTTTGAACACTAATGTAAAGTATGAGAGAGTGTTTTAGCATGAGACTTGGTTGTATTGTTGTTGTTGTGTCTCGCTGCATATACGATACGTTATATAGGCCGCAGGAGTATTGGAGCCCAAGCAAACTGTTGGACAGGTGGCTCGTTCTCCTCAACTCTGCCAGAAG
>MSTRG.58872.1 Scaffold2459 2401321-2405746
CCCATTTGTAGATTTTGGCTCAATCAATAAGTCCTACTTGTTTCATGTTAGTGGTGAAGCTTGTGCATGCTCACCTTATTGCTTTACTTCGGATCTGTGCGGTCGTCTCTGATTGAATGCCTTGGGAGTGGAGACTTTCTACTAGTTTCCTTTCTGATACATGCATGATGAGCTAATTCATTGCAAGGTATCCATTGTTGAACCAGGAGAGTAACAAGAGTTGCTGAGGTCATATTCGAATCATTGATATGATTAGCATATACCCCACACTGAAGCTCCTCATGAAGCTCCAATCCTTTCAAGTGGTTATGGTTGAGAAAATGGGACTTCCTGATGGATTGGATTCTGGTACATCTAAAGGTTATGGTGATGTTCTACGTAAGTTACAATTATAACTTATGTTTTTGTTGTTTACTAAACGTGTTTACGTGGCTGCTAATGTGTACCATTTAATTTTATGTAATTGAAGGTTGTCGGACGTGGAGTAAGATTGAAAGACGGATTGCCACTCTTGAGTTTGACCGTGATAGGAAATTGATGGGAGTTATAGTGAGTTCTAGCTCAAGAAGAAAGTCATTGCTTGTAAAGGCCCTACACCATATTCTGTCCAGATTTGACACACTTTTAGGAAAATGAGCTTTTGCATCAAAGTAAAGGGAGCATTTAATGCCAGAAATCAAACCTTTTGCATCAAAGAAAAGAGCTTCAAGTCACTTCTTGGGACTCCATATGCCAGGT
>MSTRG.143618.1 Scaffold822 131467-136984
TGCCTGCTGTCATTGGTAATTTAAAGAATTAAGAATGTTGTACACTTGCTATATAACATCTGTAAAACTCACAATATGCTACACTGGAAATATTAATTCAACACCGGCAAAAAAAAGACATGCAAGAAAGTGGCTGTTGTGTTTTGACCGACCAGTAAAAGGTGATCTTAATCAGGCTGAGCTGACATTTCCATGTTCTTTTAGTTCGCAACTGACATCCTTTGATCTTGAAAAGGCATCTGAAGGGATGTTAATGCCTGCAAAGCCAACCATAACAGCTGCG
>MSTRG.136274.1 Scaffold7261 23190-25698
GTCCTGTATGTTTTAAAAATTGGCACTCTAGCTTGTATGTGTCATGTCGTGTGTACGTACCCATGTTTCTTAGGTTCAAAACTAAATTATCTAAGGTTATCAACTCAATTTAAATCGAACCCTACTAGCCTAGCATTAGATAAAAAGCCACTAAATGACGCAAATGCAATACATCTTACCTTCTCAACAAAGTCTGTCTGTGTTTTCTAATTATAGTTTTAGTCTTCAACTTCAATCTTCT
>MSTRG.134713.5 Scaffold7081 131061-131543
GGTGGTGGTGGTGGAGGGGGTGGTGGTGTATGCTGTGTTCGTGTATCTGGTGTCACTCATGCCTTGTGGGTCAGACTCAGTCACATAACCATCCTTGTTGTTGTAGTAGTTGTTGTTGTTCTTGGTGTAGGGTTCTTCAGATTGGGTTTTGTATGGGCTGTTGTTGTTGGTGGTGGTGGTGGTGGTGGAGGGTGAAACAGTGGTGGGGGTGGTGGTGGAGGGTGAAGCAGTGGTGGTGGAGGGGGGGAGTTGGCCAGACTCATGGCCATAGAGGCCATAGCCAGTTTGATTGTCTGGGATGAAGCTTGGCTGTTGTTCTTGTTGTTTGTTGGGGACTTCTACTACTGTCTCTTTGGC
>MSTRG.44120.1 Scaffold204 262687-276782
AAAAAGATGATTGAGTGGGCAATCAAAGTAACCATTAATTTACCTCTTTTCCTATACTTTGAAAAGGAAGTTTAAAAAATAAATCTAAGTTAAATCTACTCCTGAGATAAGAGAAAAGACAAGAAAGATAAGTAAATTGTCTTTACTTTGTGTTGGAAGGATTTACAATATAGCCATATAAGGCTATTTATAGGTAAAAATATGTAGGAAAAAACTACCCACTAACTACCCTATTCTCCCATCTTCATTCTTGTCTTACCATGTATCCTTCCATGATCTCCTATCTCCTCCACTTTAGGCTCCATATGCTCCACGTTCTTCCACTTCCTCCATCATCTTTTCCACATTTTTTCACACTTCATAACTTCTTATAACTTTCAAATGAATAGGAGAGTGACACATGTCCTGCAATTACATAAATAATAATAAAATTTATTTATGGTGCCAATAGTTACATAAATTTATGTTAGGATGGCAATTTCTGTGGAACAAAAAAATTGAGTCCATGTATTTGTGTGTTGGGCATGCTATTTGGGTTGTCAATTTGTTGATTCCATTTGAAGATTGGATTGTGACTTGTGCAAAGTTGTCACTCCATTACAATCAAATAAAAAAAATAATAAAAAAAAGGAGGAGCATTTGCATTAACTATGGGGCACGGTTCTTTTTATCGGCACCAAAATAAGTTTGGATTTCACTGAAAATTTTGTTTTGGGAAAATACAATACTTTTGGAGTCCACAGGAGAGCCTACCTAATAGGCTACTCAAGTGCGAGTGTGCAGACCTACAAAAACCTACAAAAGTAATATGAGTTCTACTCTCTACAAGCTCAAGCAGGATCCTATCTACAAAACTACTACAAGCTTCGATCGATAGCCCACTTAAGGTCCCGTTTCGGGATAGGCTATTTTAGCCTAAAAGCCAACAAACCACTACAAGTTGTCAGATCAATCACTCTACTTTTCTGTCCGTCTTTTTTTAAAAAGCAAATTCCCAAACCACTCCTAAGTAGGCGTACGGAACTTTGGCCAAATCATGTTTCCTGATTCCAAAACCTATTTATTTATTTATTTTTATTTATTAGAGCTTAACCGACCTCATTTGATGGGACTTAAGGCTTGGTTTGGTTTAGAGTTTATGCAGAACTTGAGCAGCCCTTGAATGTTCATGACAGATCTATTCATTTTCTTAGAGGAGATCTTTTGAAACCTATCACTTACCTGATCTGGAAACAAAAAATTTCACATGCTACGTCGATTGTTTTCAACTAAAAAATGCTTGACAAATTTAACCCTCGATCGTTGGTAATAGAGTCATTCTATACAAATATAAGGGCGAGGAGCTTCGTAGAATACTATTCAATCAGAAGACACCAGGAGGATCAAAATGATGAGGATGGCTGTGGAAAAAGGGTTAGGCTAACCGTGTAAGGGTTACAAATCCGAACGTCATTGAGGCTCGTAATTTTTCATTCAATAATGGATGTAGTGACTTGGTGTGTCCATTGTTTTTCTCCTTTCGGAGATTTTTCCTCGAGATTCCTACATTTTCATGTATTGAAGACTTTGCAGGACACACTACATCACTGAATTCCGATCAATTAACAACTTTGAATTGTCCAACTCAGTTTTTCATACAATTCTACTTCTCTTACCTCAAAATTAACCTAAAAACACAGACACCATAACAGAAAAGCTCAATTTTGACATGGTAATTTCTTATTAATGCATTCTTCCTTTCATATATTTTTCCTTGACATTTCTATATTTTCATGGATTGAAGACTTTGCAGGACACACTACATCACGGAATTCTGAACAATTAACAACTTTGAATTGTCCGACTCAGCTTTTTCGTACAATTCCACTTCTCTTACCTCAAAATTAACCTAAAAACACAGACACCATAACAGAAAAGCTCAATTTCAACATACTAATTTTCTTATTAATGCATTCTTCCTTTCG
>MSTRG.103362.1 Scaffold4306 751904-752219
ATTTAATATAGAGTTAGTCACACTCAAAATAAATTTGATATAAACTGGCACTTTTCTAGGTATATAACATTGTTTAATTATAGGTATTATGAGACTTGTATAGTGCAAACTGAAGGACTTTATATCAAGAGTCCTGTTTGGACCCACAGATATAAAATTCAGTGAATCCCCTCTTACCTCTATAAACTAACATTACCTTGTAGCTTAATCTTGAGGCTTCGAATCCCCTGTCCTTGTTCTCTATCCCAACTGCCTGTCCTGCTCTCATATTGTTCTGGTGTCCTCACAATTTGAAT
>MSTRG.47323.1 Scaffold21357 201088-217795
CCTCGATGCATGAAAGAAATCATTAGTCAAACAATTGCAATGTAAACTAAAATTTCACAATGCAGATCCTAGTGTTGTTGATTATTAACTCAACCACTGAAAAAAAAAAAAAAAAAAAAAAAAAAAAAAAAGCAGCTATGATAAGACAATAACTTGTTGATTATTAATTCAACTACTGTAAAAAAAATACTGTTAAGACAATGACTAGGATCAGCAGATTCAGCATTCTATGGATATCCTCTAATGCAAAAAGAGTTGATAGCTCCTTGACATGTTAAAAGACTTGGTGTTTCACCTCATCAACCCGAACACTGTATATTTGAATAGTAGAATCCTCCATTCCTACGGCACAGAAATTGTTGTCATGTGGATCAAACGCCAAGCAGGTTGCTGCTGGAGGTGGAGGCATGAAAGTCGTC
>MSTRG.83212.17 Scaffold339 28201-128220
TACTTGGAATTCAGTTTCAAATTGATAATGAGCCATTCAAGGTATTCCCTCTCACTTTGTCCTGCTATTAAATTTTAAATTGATGGCCTAAATATGCTCATTGTTCTTCTGTTTTAGGTGGAAATGAAGCAATTTACAGCCAAGGTTGTGGACATGATAAAGCAAGAAAACTCTATGCATCCTAAGGCGGACCCATTATCTTATTCGACGTTAGTTTTTATGTAGATTTGCCATATATATGCAAGCATTGTATAATTTTGGGTGCAGCATCCTATTTCACATTTTTACTTTGACAAATAGTATGCCACTTTAACTTTCTTTGTGAGTCTCAAATTAGGTGGATGTCATTGTCTTGTTTAAGGTTTGTGTGGCTTGGTTGGTGAAAGCAATTAATTCTTCATTAACAAGTGAAGTTATTGATTTTGTGTTTTGATCTTTGAAACTTGGATGATGGATTGGTGATTTTCTAAAAAATGTGATCACAAGGTTGAAGGTTCATTGGGTTTTTGTTTGTTTTTCTGGTTCTTTGGCTTTTGGTGACTATAGTTGTTGTGGCAACTTCTTACGAGAATGATATTCTTACATTATATTGATCAATTCTTCTGCTCTAATGGCTAGAATAGGGCATCAGCTTATGCCATCTTTTAAAAATCTTAACTTTCAAAAAATCAGTCTAAACCAAACAAGGTGGCTAGTTCTGCAAAAATTGAACTAAAATATTTAGATTTTGAAATATCTTTTGTATATGTAAAGCATATCCATGATCACACCAGAAAATGAAATCCACTACCCTAGTATTGGATTTGGATGGT
>MSTRG.44384.1 Scaffold205 332507-334208
CCATGTCTCAAGTTAAAGCAATGGGTTTCTCTGAGGTATTTGGTTGTTATGAAGGGATGACCTTGTAGAAGTTAAGGTTCTTTCCCCATATGCTCAGGCTCTTAGTGTCATTATTTGGCGGCATAATGAGGTTGATTGGCTCTTTACAGCCCTATACGCTAGCCCTAATCCTAGATCCTGTTTGGAGCTATGGGATTACCTAGCTAGTGTCGCTCGGGGACTCCCTTTACCTTGGCT
>MSTRG.144415.2 Scaffold838 2382822-2387209
GCCGCATACAGAGAATAAAGAGTAAGAGAACCAAAGCAATTGCTGCGAAAACCCCAAGCATTTTCAGAGAAAAAAGTGTGGAAATAAAATTTCCCATAATAAACCGAGACTAGATCACAAGGCCGAGAGACATGCCCCCTCAGTCTTCAGGTTGTTTACTTGGAAGTTTTGATGGCATGAGTGGAGTCGGAAAAAAATAAAATAAAGGAAACCCTGATGTAGACGTCCCCGAACGCCTCGGGAGGATGAGTCCCGTTCTGTTCATTTGGGCTCACTACAGTTCGGACTCTCGAATTGTCACGGTTCTTAATCTGAACCAAAGAGTCTAAATCCGGCAAAACGTTTTGAGAAAAAACAGATTTTTGAAAGAAGTGCCAAACATGGACTGCTTTGCCAGATACAGAGTCTCCATCTAAATATTTTTTAATGGGAAAATTTAGGAAACCCTGACTCGGTGCCAAAGGCCACGTGTCCGTCATCACCAAAGTTGCCTTGGCTCGGGAGCTTGGGTACGATCGGGGAAGGTCAGCTATGAGCACCCCCTCTCGCCCGGTCTGAAGACCGGCCTCTACTAACCGTGATATCCAATTTCGAAAACATTATGTGTTCTTATTCCATTTATTAGCTTAGAATTACTATGTTATGCGCACAGCATACAAGTATAGACTAGATTGCCTAATTTGGAAATAAGCGCTGCACATCCGTTTATTTTGGAAAATGTTTTGGAATTTGCTACCCGCAAGTAGGCTAAAATACGGAT
>MSTRG.58830.1 Scaffold2459 1727867-1734692
ATATGACCCTAAAATTAAAAACAGAAGTAGAATTTCATTTTACAGACCAGTAGAATCTTTACGTGGTGTTCTAGATCTAGTAGATGATTTCTAGGGCTCGGGAATCCGAAGCATTTCTTGTTGATTTCAGGAGGGGGCACACAGGGATACGAACCTGAAAACAATCACAGTTTTAAAGCCGAAGTCTATTTTGAACTTCCAGAGGCCATATTCTTCTCATCTTCTTTCCATTGCTTTTGGATATGTAAGATCTCTCTAATGGGTCCCTTGAAGAATAATAATTGATGAGAAGGCAACTTTGTTTAAAATGACTTTTGATTCACTGGACCTTCTTCGGCTACTACTACTGACCTAAAAATACCAGGGGGTCGTTTGGCATCATCCTAGAATCTCCTTTACTTGTTATGGAACATATTAAAGCGTGAAAGGAGCTTCAAGTACATCAAGATGGTTAAAGAGAAAGCAGACCAGCTGAATGCATGGCATGGCACTGAGACGGTAATTCTTTGGAGATCAATCATTGGATTTTTATTCCAAGCAATCAAACTCTTGCCCGCAATCCAAGAAATCCAAAGATCAATCTGATTTAATTGACTTTTATGATTTGTTGGTCGCCATTGTGGCCTTCCCTTTTCTTTTCTTTTTTTCTTTTCTTTTTTAATCTTTGGTGAAATTTTCTTTCTTCAGTTCCTCATGGATGTGGATTACAGACTTATTAAAAGGCTGACCCTTTGGAATATGTTTTGTTGCAGAACTTTTATGCAGAGTAGGTCCTGTGGATTGCTTTCATTTCATATCAGAAGAAAGCACAGTGCCATTAAACTATGTGGACCTTTTTTTTTCTTGTCATGCCCTAAAATTCATTGTGTGCTCAAGAGAAAAGCTTCAACAATTATTTGTATTTGCTTTTGTATTATTGTACCACTGTGCTTCCATAGGATGCCAGATCATTCTGAGTATGTGATTCATGTAATCTACTGCAATGTGATGTGTAATCTTGTTTATGTTATAAAATTCAACTTCACATCCCTTCATTTGAAATCAATCTATTCAAACGGAGCGTTAGTGTCTATTTACAATTCATAGTATCATCATCCTAATTTTCCCTGTTTTCAGACATATGATGAGGTTGGTTGGTGTAGCTTATGGAGTTGTTTATGAGTGTTTTTTGGGAAAATCTGTGCTAGATTATTTAGTTACAATTATGTTTACAACTTATGAGACAAAAATAAATCAAATAAATTGTAAAAAAATGATTATTGAAAGTTGAGGGGGAG
>MSTRG.140721.1 Scaffold786 596475-596976
ATTTAGATTAGTACTTAATGGTAGTTTAGTCTTGGCATAGGCAATTAAGATTTTAGAGTTTCTTATGTGCCTATTTAACTTGTACCTTGCATTCAATAATGAAATAATAATAATCTGATTACCTTTGCAATTGTTTCACATATCGTACTTAAAATTTCTTTGCGACAAAACTGTGTCCATGCAATAATGTTAGAAGATTATATAGGTAAGCCGGTGCCTAAAAAGGGCTGGCCTGCTCTACCTCAACTTGCATTGCTCATCTCCCCCTACATATCTCAAACCTGCAGACGGAGCAACAGGTTGTAGAATTTGAAGCTATGATGAAATAATGTAGGTTCCACATTAGAGTTGGCATAATGAA
>MSTRG.40849.3 Scaffold1939 308321-309637
GGGAGAAGACAGGGCTCGAATTGGGTTCCCGGTTTGGGTGTTAGAGCCGGTTTTCGGTCTAGCCAAGCTAGTTCATTAAGAAACTTGAAGTCGAGGTGCTGATACCCCAAAATCACCAAACGGCGTCGGTCTGGCTCGAAACTTGGCACACACGACCGCCTAGGCACGAGAAACTTGTGGGAGAAGACAGAACTCCAATTAGGTTTCCGATTTGGGAGTTAGTGCCAGATTTCACTCTAGGCAAAAGTAGTTCCTTAAGAAATTTGAATTCGAGGATTTGACACCTTAAAATCACCAAACGGGGTTCGATTGGCATGAAACCTGGCACACACTACCGCCTAGGCACGAGCGACTTCTGGGAGAAGACGGTACTCCAATCGGGTTCCCGGTTTGGGAGTCAGAGCCGGATTTCACTCTAGGAAAACTAGTTCCTTAAGAAACTTGAATTCGAGGTGTAGACACCCCAAAATCGCCAAAAGGCGTCAGTTTCGCACGAAACTTGGCACACACGACCGCTTAGGCACGAGAAACTTGTGGGAGAAGATAGGACTCCAATTTGGTTCCCGGTTTGGGAGTTAGAGCCGGATTTCACTCTAGGCAAAAGTAGTTACTTAAGAAATTTGAATCGAGGTGTTGACGCCCCAAAATACCAAACGCCGTCGGTTTGGCCCAAAACTTGGCACACATGACCGCCTAAACACGAGAGACTTGTGGGAGAAGACGGGGCTCTAGTCGGGCTCCCGATTTGGGAGTTAGAGCCAGATTTCACTCTAGGCAACCTAGGC
>MSTRG.101181.1 Scaffold4206 1082043-1087545
AGAATATTAGATATCATGCTTGAACTCCTGATGTAGAATTCATCGTAGGACTTGTTGATATGATGAAATACCTCGTTGAATAATAAAGATGATATATTGTGGTTTGTTTAACTTGTGGATGCTTGGGAAATACATAGCTGATGCCAAAATTTTGTGTGACCGTTGTAGCTTTACGTCGGCTTGAGAGGAATCGGCCCGGAGAGACAAAAACTTGATTGTTGCATTTTCATAAACTTGCTTAGAGTAATAAAATTGTTGTAACTTAAATAGATCATTATTATTTGTTGATATTGCCCCATTCCGATAATGCCTGAATCAGGATATGAAATTGATATTGCTCATCTCATTTGTCAGTTTTACTATTTCAGACAAATAAATTCTTGATTGAGATCCACGACCTCGGGGCCCTTAGAACCCGCACTAATGAGAGCAAGGGCTGTTCCTCGGAAGTCCGAACAAAAGCAAGACTGTCCCTCGGGAGTCCGAAGGTAGCACACACCCTACTTTGGCAAGAAAGATTCCTCTGGAAGATAACCGAGTCTACCAAG
>MSTRG.74671.3 Scaffold303 70469-76153
CTAAAACTCAAAATTTGTTTCCCACAAATGTGTTACTACACTGGATTCAAAAGCTCCAGTTTCAATGGGTGGCCGTTCAGGGGGATTTAGAGGTGCAGAACAATTATATAGATATAACAGGAGCAATATACAGAAAACCTACAGAGTGGACTAACCGGGCGGGAGAGATGGGCTCTGTATACCGGTGGGAGTGTTAAAATCTTATTGGAAGAATATGAAGTTTCTATCCGTTATGCTATGAACTTGCAACGAAAATACAGACATGTTTTGACTTAGCCCTCAGCCTGGTATGCCATCCTTCATTGCAGAAATGTGTATCACTAACGGAAGATTAATAGGATTCCGCTGGGAGTCTGAGGAGAACGACAGTTTCATTATGGTATTGGTGTTCAAAGTTTTGCAATAATCAAGAAAAGAATCAGATTACATTCACTCATTATTTTAAATATTGTATTTTGAAGTATCTTAAAGCCATGTCTGAATAAAAAGTTTCTTCAACTTTCAAGAGAAAGTTCAAGCAGGATAACAAGTACTACTAAATAAAGATGGGTAATAAACTAGTAAAGCATCAACGATCACCTACTGGTTTTAGACAGGTTGTTTAGTGGGATGCTTCGAATAATGTTTAGCATACACATGCTCACCTCTTGAACATTAATTGAGTTTCTATAATCCTAATTCCTATTCTTGGCTAAAGAGGATGTGCACTCTGTAAGGTTTTCTGCATATTGGTAAAGCTGTTATATGATGTAAATTTGATGTCACAAATACCATTCGACAAGATAAACTTCAATACCCAACTCCCCCCCCCC
>MSTRG.70790.1 Scaffold2894 899619-900791
AATTCAAAGACCAACATGAAAGTGTATAGTAATGTGTGAGACTCTAAAGAAAACAAATCACAAATTCAAATTAAGACTTATCTTGAAGCTCAGGTCGGCATATCTCACTAAAGATTGATATAAAGACATTGATAACAGCAAAAGAGAAATCAACAGCACAGGAAACTAGGAACAAATGTAAAGGATATTCAAATTGATTATCTGCCGAATATCCACAAAAGTAGAC
>MSTRG.12884.1 Scaffold1268 287822-364752
CCTAGATAATTTTATTTATGCATAATTATAATGCTAATTGTTTAATTTTTCTACACGAATTAGTTTATCGGTTTGCAAGAATGGTCTTCCATTTCAATTTGAGATTTGAGAGATACGCCCGGTAGATAATTTCTTTTATGTTAAAATATTGAGTTTAATTATTTTGTCAATATTTTGGAGATTAAAATAATTATTTACGCATTTGGGCTCCTAAAACTGTAGTATTTATACATAATGGAGATATTTTTCGAAAGGCATAGCAACCACTGTTATGCAACCGTTTGGGCCCAATTTGGGACCTATTTTGATGATCCGAACCGTTCAATTTTTAGAGTACATCATGTGGAATATATCTATAAAAAATCAAGTTGATCAGACATCATTAACCCTTTTATGGAATGACATTTGTATTCAATTTTACACTTTAATTCACATTTACCATTTATTTTTTTAGATACGAATGTAATTTGATGAAAGGACTATCGATGTCCAATCAACTTGATTTCTTTTACAGGCATATTATACTAAGGGGTTGTTTGGGATAATCTAAATAAGTGCACTTTTTACTTTTTATGAAATATGGGTTGGATTTGAGTTGGGTTGGATTTGAAGTGATGTGTTAGAGAGGTGATGTGACTTAAATAAGTTGATGTGATTTTTTGACTTTTTTAAAACTTGCCAAACCAGCCCTAAATGTATCCTAAAAATTGAATGATTCGGGTCATCAAAATTGGCCCAAAGGGAGGTGGTTAATGATCTTTCATTCATTGGCAATGAAACTTGCCTAATAGAACAACAGATAACAAGATATTTCACCATTGTTAGAAAGTAAACGCTTTAATGGCTATACTAAATAGAGATACTATACGTTATAAGATGACCATGCATG
>MSTRG.58576.1 Scaffold2450 971430-1084056
CTTTGCTCGAGCGAGCTTTCTTGCGCTCGAGCGAGCCCTGTGTTATGTGTTTCTTTGCTCGAGCGACACTTCTTGCGCTCGAGCGAGGTTCTTTTGTGTCTGGTCGCTCGAGCGACAACTCCTTCGCTCGAGCAAGATCCGTATATCTCAGTTCGCAGCAGTGTGATTTTTATCACTTTTTCATCTCCTTTCACTCCAAACCCTAAATCCAG
>MSTRG.113755.1 Scaffold5 795021-795578
CATTTTCCAACTTAACCTTGATGGAGGACTTGTGAGCATTAACTCTTTCAACAGCTTTTGTTCATATTAGCATATCAATAAAGCTAGTCTTCTCTTTTATAATATGCCCATGCTCATCTAGGAGAATAAGTGATTTATCTAATGGACATTCTTCATTGGCGTTTCTTAAGGATATGAAGTCTTTGAATCTCTTAATTCTGAGGAATAACAATATTTCTGGATCTATCTCATCCAATATTGGAGATTATCAAAGATTGTTACAACTGTAAGTTATTGCTATAAATTTCAGGTCAGCTCCCATATACTTCAACCTGAAATTTTGCCAGTTTAGAGCCAGATGGGGGAAGATGGAGTCAAAACCAGACAGCCAACTCTATGAAGCAAATACTTTTACTGTATTTACGTTATTATATAATGAATTTAATTGACCATGGTTTGTATAATTTTTCAGGGATTTTAGCTTCAAC
>MSTRG.101668.1 Scaffold423 2429974-2430447
CCCCCATTCAAGAAATTATATTTCTTGTCAGTTTGAAGAACAGCAGTTAATAATCAAACAGCCTAGCCTACTACAAAGATGCACTAATGTTTTGTTGTTTCAGCAGAAAACATTTTCTATGAAAAACTTTTTCCAACAAATATTTTTCCTAGAAAACTGTTTCCTAGGTTTGGTTGCATTCTTAAAATTAATGTACTAATGGTTATATTGATGGTGGTGGTGGCAGCGGGCCAGAGGTGGAGGTGGAGGTGGAAGTGGCGGCAGTGATGGTAATGGCGGAAGTAATGGTAGTGATGATAATGTCGTGGCATTGGTAAAACTTTAGTTGGAAAAACATTTTTCACATTTTAAAAGTGGCCAACATTTTCCACTCAAATAAATTTGTTTTTCGTTGACCATAGAAAACACTGTCTGTTATTTTCCAATAAATGGTTTTCGTTCAGACAAGCG
>MSTRG.129477.1 Scaffold6541 245925-289337
CTACAACTGATCATCAATCAAATTAACATAAATGAAATTTTATTTAGTACTAAAACTAAAACAAGATATAAATTCAAGTAAGAAGTTTGTAACAATAAAGGCAGACCAAAAGGCAATGCTGAATTTGTGACGTATGGTTCCACAATTAAACATATTTAGCAAAAGAGAATAAATATCAATTGCATTCAATCTCATAATCTTCGTGATTATTGAACTTAGAAACAAGTGCCATGTTTTCACACAAACACTGGTTGCTGAATATAAGTATCTCGGTAAAACTCTACATGACCAGAAGTGTATTAATAGTTTGAACTATAGCTAAAAGAAAACTAAATCATTTTAATCTAATTGGTTCGGACCATCAAATCAAAAAGCATGCACATATTTATTGAAGATCAAATTTGTCTGGTCCTGAGCTGATCCACCAATCTTGCAAAAGAAGTAGTGAGTCTTTAGTGACACCACTGTGGTGTCATCCAAAAGCCCTCCAATGGTTCAATCGGTACTCATTTTGATGGAGCAGACTAAGAGTAGAGAGAGAGAGATTGAGAGGAGAGATTTAGGGTTGCTGAATATTGCCTGCCTTGTGTTTGTCTTACCTTAAGTCTTTTATAGAGAAACTCTAATATGAGTTAGATTAGTGAGATAAATAATTCCCTAATGTCTACTTTTGTTTTGCAATGGATATGGAAATATATAATCTCAATCATATGTTTGTTTTGCATTATTAGTTGTAGGATTAAAAAATTCACCAATTTTTTTTTGGATAGAATGTGCATCGAAATCTAATCCGTATAACAAAAATTGCAACCAAACAATGAAATGTGAGTCTCATAGATTAATAATCTCAACCATATGGTACAATCCACTCAATCAAACAAGCCCTTACGGTATAATCACACTCGGTGAAATTTAAAGAAAAACGCCAAAGAATATGATATCATGAAATTAGTTTCATTTAGATGGAAAATATAAACTCTTTCGGGTGAAAAATCAAATAATTGAGCATATAGCTCTTCATAGAGTGGAATGAGGAAATACATATTCATGTAATTGACCCCACCAAATTGGAACAAAAGGGTCTATTTGTTTGGTTTAAGTGAAGATTGAAAGTTCCTTTCCTTCTTTTTAAACATTGCACTTCCTCATATTTAGGTGGACCTAACACAGCTGAATCCCATGCTATCAATTCCATTTCAATTTGACACACTTAGCTACAGATTTTCAAGACCCCTTTCCCAAAAAAAAAAAAAGCTGGTCAAAAAATCCAGGCGCGACAGATTGTAATTTGTAATTACTTTGCACATAATTTTTGGTAAAGATTTTCAATCCGTAACACGTAAGAACCAAGTTTTAACCACGAAAGGCATAATAAGAAAATACCAACCAACCCAATACTTGAGTTACACAATGAATCAAAAGAATTTG
>MSTRG.103059.6 Scaffold4295 541390-544127
ACATTTGTTGAAAAATAAAAAGGAAGGGGAAGAAAGAGATCTATATTCAGACGTTAATGATATTTGAGGTTTTTTTGGGAACTAAGTGAAACTCAGGCTCTTTCCGAGGACTTAAAATTTCTTGGGAGAAGTTTTTGGAGGTTTTATCTTTCTTTTATTTTGACTGTGCAATCTAACCCCTTCCAGACCCCCATCAAATAGAAACTAAATTGGTTGTAGTTTTTATTCTCTTCCACAATTTATTAATTCTGTCCTTATATTTATGTTGTTGAATATTGAAGTCACATTCCACAGTTTTCTGATGAGAGCAAAAAGTTCTAGGACTGCATATTCTTGAATATGTTATTTTGAATGTTCTCTATGCTGAACATTAAACTGTCGTTGTTAATCCTTGTTACTAAAAGATTTAAGAAGTTGCTTTCTATAAGCATTCTTTTCTAAGATAATTTATGCCTGGAGTACAACTGATCATGGAAGTTGTACTTGTAGTTTGCGATCATTGCATTGACTAGATGATTTTCCATGGTTCAGTCAGTTGGAGTGCTTTGTGAAGCTCAGTATTATCAAAATGTTTTACGTGTTGGTTTCAGGCTAAGATCAACTTTGGTAACCATAGTTTTTCCTGCTGCTTTGAAGCTGCATAAAGGTTTTGTCTTAATGGTGTGTTGCATGTGATGATCTTTTTCTTTCAAGTCTTGTCATTACTTATTAATGTTGTTTCTGAC
>MSTRG.114492.1 Scaffold505 2527-16991
CGCTCTCTCTCTCTCTTCAAAGCCTTTCTCTCACTAAAAAAAATATTTTTTCAACGGCCGACACGTGCAGACGTCCCAGAAACTCTTCCTCCTGTTTTATCTCTTCCCCAATTATCAGCGCGCGCGCAAACACACACAATACAAAGAGAGAGAGGGAGAGAGAGCAAAATCTCCGATCTGAAGGACCTGTTTCTACGGTTTCTTCTTCGAAAAATGGCCGCTCCACCTGTTAGAGCTCGAGCCGATTACGATTACCTTATAAAACTCCTCTTGATCGGCGACAGCGGAAGAGAAATTCGGATTGATTAGTCGAAGAGTTATTGAGTCTATGTATCTTTTATGTAGAATTTCATCATAGATGTGAAAGGAGTGAATAATGTATCCTGTTGTTTGTAATTATTTATTTGTAGTTTCGCAGCAGAAGCTTGGCATTAATTATTGTTATTATTGTATTCATTGAGAGAAAGAAAACATGTATTATTATGAGATTCTATTACTCAAGGGTAATGGATATTTGTTAATAAAAAAAAAAATGGAACTAAATTACAGGCTTTGGTAATGTTTCCGAATAATTAAAATTTGGGGTGTGACAGATACCGATAGCTATTTCATAAGATTAGATTTCTATCAACTGTTTATTTTTTTACTATCCATTTTTATTTTTAATACAAAACTGATTTGATCATATAGATATTGATATCCAATCAACATGACTTTTACAGGTGTATAGTATTCGATGAGTTGTACACATTAAATGATTCAGATTATCAAAACGAAACCCGTTATGAATTCCATGGATCTAACAGGACCCTCCAGTTCGATCTTGGAGGACTGGAGGGAAGGCAGACCCTTATCTATACATACATTGCATGTGGACTATTAAGAGAATTGTGAATTAGTGCACATTCTCACCATTCCTCAAAGGTTTTTACTTGTTCAAGCAAAGCCAAACCAACCTACTCTGGTTTTGTCCAGTATTTTTATTTTTTATTTTTTGGTATATGGATCAATTTATTTTTCAATTTACCTTAAACTCTGTATTTAAATCATGTTTTTCTTAAAAATATTATTATTAATCACATTTTTTTTTACTTTAATGTAATAATTTAAAAAGAATGATTCTAGTTGAGGTTCAATTGGTGAAACTAGAAGGTGTTGTTGGTTTTAATAGACTCATTTTGATACTCACCTCAAATGATTTAAATTGTACATTTTTTAAAATTCATCGAGAAGGGTATTCATGAAAAAAATATATTGATTAGATATCGATAACTAATTTATTTTAAAAATCATATTAACCAATCAATTTTATAAAACGAATATAATTCGAACCTGCAACTATTGATATCCAATTAACTTGATTTGTATATGAATTATTATCTTGATGAGCTATACAAAATGAATAGTTTGGATCACTAATGTGATCCCTAAAATAGGCCCCCCAAATTGATCA
>MSTRG.142291.1 Scaffold81 1206799-1217514
ATCAATTTCATCATCGGCGAAAGAGAGGTAGTGGGAGGGAGGCGGGTGTAGGTGGTGGCGTCACTGCCGGAGACGAAGAAGGGAGGCGGCGGAGAAGGGAAGTCATGGGAGATGGTGCGATTAATGCAATAGTGATGGTTAGGGTTAGGGTTAGGGTTAGATTTGGAGAGCTTTTTGGGAAGGGGATTGAGAGGGTTTGGAGTGTTGCGAGCTAACACTACAAGGGGAAGAGAGAGAGAGACTAAAGAGAGAGA
>MSTRG.2760.10 Scaffold1055 215847-221731
GGTGATTCCGGCGGCGTTTGCAAATCAAGTCTCACGGCGCCGGACTACGCCGTGTTCTGGTGCTCGCCATTTGCATCGCCGGCATTTGGTCGGCTTATATTTACCAAGGAGTCCTTCAAGAGACTGTGTATTATCTGGATATCACCACCACCGCAGCCACCGTCATCGTCTGTGCTTCGAACCCCCTCCGGTACCTCTTTTCCTCTCTCTCAAACCCTGTGTCTCTGAGGTTTAAATTGATGTTCTTTGTGGCTGTGTCTGTTCAAACCAGTGAGAGAGAATGTCTTTGTTATAGTTCTCTCTCAAACCCTGTGTCTCTGAGGTTTAAATTGATGTTCTTTGTGGCTATGTTTGTTCAAACCAGTGAGAAAGAATGTCTTTGCTATAGTGACAAATCTCTTTGATCCATGTTTAAGAATTTCAATATTTATTGGATCTTAAAGTATACGTACTCAAAATAATGAACACCTACATGACAGTGGCTAACCAACCTAATTGGGGAAAAACTTAAAAAAAGAAAAGAAAAAAGAAAAAAGGAAAAGGCAACATATAATAATTCTTGCAAAATAAAATTATGAAAGGGTTGGATAGTGCATGAAAAAGAAATAAGTGTAGTACCAAGCAAGAAACACATTTACATAACTTCAAGAACATTTCAACAGAATTCAGAGGTTAAGGAAATAATAAAAGGTGTAGTTGCCTTGCTGCTGCGCAACTCACCTACTGCCACTGCTCTATCCCTCTCTATCTCTGCTTTTTAGCAATCAAAGCTTATTTTAGGAAGTTTGTTGAAAATTAATTTTTTAATTTTTTTAAGAAAACATATATAAGAATAAATAAAAAATTAATGTGACTGAAAATAAATTTGAAGTCAAAAATTAATTTTTATTCAAATTCCCAAAACACCCCGAATTCATCACTCATGAAACGTTTCTCACTATGTGTCATCTTTCACATGAATTATACAGCTTTGATTTTCTGGCAGCAATTGCCGACCATCTATATATGATATCTACTTTGATAAGTACTGCACTTTGTGATAGGTTGGTATAGAGGATTCACAATTTATATGACCCCACCTCATTTATGTTTCTTTAATGTTATTGGATTTTTTTATATTTCATATCATGATATGTGATCAGATTATTTGATTTGTGTATTTTATATTTTAAAAAAATAATAATTCACAAATAATTTTTGTTTAAGAATTTCAATATTTATTGGATCTTAAAGTATACGTGGTGATTAAAAAAGAAGATTTAACCCATACTCAAAATAATGAACACCTATATGACAATGGCTAACCAACCTAACTGGGAAAAAACTTAAACAAGGAAAAGAAGAAAGAAAAAAGGAAAAGGCAACATATAATAATTCTTGCAAAATAAAATTATGAAAGGGTTGGATAATGCATGAAAAAGAAATAAGTGTAATACTAACCAAGAAACACATTTACATAACTTCAACAACATTTCAAGAGAATTCAGAGGTTAAGGAAATAATAGGCTCATATCGCATCTCTTCTGTAATTGGTGGTATAAGAGATTCCGGAACCCATTCATCGCATAGCTCATCTATTTCCTAGAAAAACCAAGCAAACACTTGAAAAATGTTAGGTTGTCAAATTGTTTATGGTACAAGAGCTACTATCTTCAAACAAGGGCACATAAAAGACTCATAATAGTTGTTTGGGCCCTTCAATCTTAGTTTTACAACCATTCATGTATACATAGTTTGAGCCTCATTTACCTCATTGCCTTTGGAAGTCAGCAAGTTCTCCTAAACTTCAGCTCAGTATCTATTTTCAATAATTTACGAATATAACTCCACTATTATTAACACTCTCAAATCCAAGGCAGAGTTGTTTTGCAATTTTCAAATTGGACAGACCCTATGTGAATGGATCAATAATTATCAATTTATCATCATACTTGCATTTGCAAGCAAGTAAACCTTGAACAGCTGCAAATCTATCTATATATGCCTTCCAAAGGCACCTCAATTGAGAACAACCAGTTTTCTTTCTATTCTGAGGTGG
>MSTRG.38820.1 Scaffold188 75559-75847
GTGTGTTTGCTTGCAGAGATTGAAGAGAGACTCGGCTTGAGAGCGCTGGTCGTTGGCGGTGGACATGAGATGGGATATTAGGGTTTCGAACTGAGTCGGATCGGAAGCCATGGATGTGGAGGAGAAAGAAAGAATTAGGGTTTTTCAGAGACTGTCACAGGAGAGAGAAAATGGAAGGAGGCGGCTCTTCTCTGCTCTCTGGGTTTTTTCTTTCTTTCTCTCTCCTCTTTCCCCTTCTCGC
>MSTRG.126343.20 Scaffold619 524190-527189
AGAGAGATTTCTTTTCTTCTTTTTCTTTTTTCCTTCAATTTGTGTAGTGGATTACAAATATTTACTTTTAGATTTGTGGATTATGCTGATTAAGTTATACAACTATTTCTCTTTTGGTCTACAAAACATGCTGATGCACACAGATTTCTCCACCATGACCACAGTAGCAGATTTGCCTCTTCCTTTTCGCAGACACCCACACTCCTCACAACCATCTCTGCTCCTCCCTCCTTAGCGACCCTTTGTCGACATCTTGATCGCAACAACTATAGCAACCCCACTCCCCATCTCAACCATCGTACAACTACCATCTTAGCCTCATGCAACATTGCGAAGGAAAAACTAAAAACTGCTTTGAGAAGTACATGACTTGGAGGCTGAACTCCAAATTGAGATTGCCAGAGAAATCCGCAGAAATTCAAAGTCGTTTCGCTTGAGACATCACCCTCGGGAACAAGTTTTCCGGCTTCGGCGCTTTCTGGCACATCCCCATGAGTTTACTCTCTTTATCTCTCCTAGAAATGTTTATAGATATATGAATATATAAACATGTGAATTTGTGAGCAAAAATGGTATGCTCTCTCTGTCTTTCTCTTATTTTGCTTTCTATGGATATCTATGAAAAGTCATGATATTATTGTTGTATTTTTCTTATCAAAATCATAC
>MSTRG.126267.1 Scaffold618 94473-95197
CAGGCCCCATTGCATTTAGTCCAACTATGTCCCCTGGGGCTCCTTCTCTAAGTCCTACAGGTTCTACTGTGCCCACACCAGTGTCACCGGCATTGGCACCGGGAACTGATACAACTTCTGACCTCACTCCATCTCCTCCAACCGTGGCATCAGATGCTCCAACTTCAAATTCAGGGATTCGGCCAGTTGTCACCCCGTCAGCCACCGAGCCATCTCACAGTTTTTCACTTTCCCTGCTGATGGCTCTGTTTGGAGCTATGGCTCTGAAGTACTTCTACTAGTTTGCCATTTTTAGTTGCTCTATATGTGTAGTAGTTATGCAATTGAGATATATTCTTTTGGGGTGTGAAAGTATTGTTTGGGTTTGTTCAGACAGTTGAGAGATATTGATGAATTATTTGTTGAATTAGCTTTGTAATATTAATGTCCTAGTG
>MSTRG.55860.1 Scaffold237 1281002-1281650
GAATAAGAAAGAAAATTTTCACTAACCGGGTCAAAGCTCTTATTGCCAGCTGGGAAGAAAAGAATTGTCGGGAATCCATCAGACTGCAAAAGCAAATTCAAACATAAAAAGATCTACCCATGTAGGATTTCCATGTTATTACAGATATAAATTGCTCTTACAGTGCATCAATATCCTTAAAATGCTACTCAGAACATAACAACGGTGCATTTAAAAGTGACGATGGCTAGCACGTGTCATTTGCTTGAGACATCACTTGAGAAGGGATACAAGGAAGGGAAAAGAAAACAAAAATTAAGGTGAAAATTAAAGGCCAGTTTACAGACTAAGAAATCGCAGAGGAAATTCCATTGCTATCACTAATTCCATAATTAAAGCCAATCGTAAAGCCCTATCTCAAATCAAATATTCTCAAGCCCTGCAAATCAAGGTTTATTATTGGCCTATCTTATCTTCTAACGTTAGGGAAAACTGTTATGGAATCAAGCTATCCTATTTTTCCTCTTTTAAGGTACAGAAAATGAGCAGCTAGAGAATGAACTAGAAAGAGGAGAACAAAAAAATTATAATGGAAGGAGGTGTTTCTACTTATAATGTTATTATGAAAAAAA
>MSTRG.21488.1 Scaffold1480 356031-356576
AGTTGATGTTAAGTGACCGCTCTGTAAGGAATGCACCATTTTTCTCATGCTCAATACCTGGATTGATATTCTCAGAAATAGCATTGACAGGCTTCTTGACCTCTGCAGATCTCACTCCTTCAGTGCTCAACCCAGCACCACGAAGTTCAAGAATCCATGTATCAAATCCTTGGCTGGACATGTAACGTGCAAATGATGACTGCAAACAGCC
>MSTRG.81309.1 Scaffold3317 1221759-1226953
GCCATTGGTAGCCGAGATAATGTTGCCCGGCTGCCGAGCTCCTAGAAGAGTGGGCTGGCAATTGAGTTAGGTGATGCTCAGCAAGATTTGTGCTGACAGATGGGATAGCAGCTCCACATGTCGAGAGACGAATGTGAGTGGATTTGGGGCGCAGAAGgtatataagcaagtctgcccccccatacttacacggatgatatttggtgagacatacactaaacaaaactca
>MSTRG.28854.1 Scaffold1659 668894-672505
catcaaaatctcctccattcaattctacttcgatatcatcactcagGTATGTCATTCAACATCAGACCTTAGAAGATTTAGATTATAATTGGGTCTCCATTAAAAAGCAGGGAAGAAAAATTATAATTCCAACACTATTTTATTAATTTTTTCATTTGTTTTATTTTTTTATGACTACTTTAATCACAAAAAATAATCAACCCAACCCAACCCAATTATCAAAAAATCAACCTACCAAAACTTCCACCCCCTCTCTCTCTCTCACTACCACCATCCTCTCCATCCTCTGATATATTGTTTCTAACATATGTACCGATATATATACATATTTGGATTGTTGTAGATCAATGGAAAAAAAATGATTCAAGAGCTATTAAGAGGTGGTGCTGGACTAATAGGAGGAGTGAGAAAAATCTCCATTACCGGTGTTCTAGAGGGTTCCTCCCCTTCTCCATCTCCTTCCTTCTTCACCGCCACTACTCCGGCGAGCTCTTCAACCTCTGCGGAGAACCAAAACCTTCAGTGTCTGCATGATGGAGATGAACAGTTAATTTCTAAACCCATTTCAAGAGATGAACAGTGTCTGTAAACAATATATTCATGAGAAATCAAAACCCATTTCATATGTTAGAAACAATTTATTCAATAGAAATAGAAACCCATTTGAAGAGTGAAATAGAAACCCTTTTGTTGGAGGTTGTACAACAAAAACTATGTAACTATGTAAGGAAGTGAGTTTAAAATCAAAGAGTGAGAGATGG
>MSTRG.19336.2 Scaffold1430 134595-137214
CAAGTATGAAAACAGGACCACAGCTCACTTTGATAGAGCTAGCTCACCTAGAGCTCTCCATGGCCCTTCATGACACAAAAGAAATATATTCTCTACCCACTCACCCCAGCTCCATAGCAACATAGTTGGACCCTTAGCTCACCTATGTTTACTTACCTGCTCAGGATGAGCCATTGGCTCAACCATGCACTCACCCCCTTGGCTACCTAGGTTGGGAGCAGGACCTAGGCACTCACTTGGGATCATTAGAGGATTGTGGATTGGAAGCTAAGACCTCTGGATCATCAAGGTCGTGTAACTGTCTCCTTGCAGTGATAGTTCCACCTTGACCTAGTTTAGAGAAAAAGGGCGTTGACCTGACACTTACACATGTTACATATATGATACGCCTCTCAAGATATCATACCT
>MSTRG.150730.6 Scaffold920 403831-416604
TTCCGATCTAGTTTTCAAATCGGGAGTCCTGTGCCTGTTCATTAAGTTTTCACAACTCAAATTGGTCCCTCCTGAGACGTTCGAGGTGTTCGCTGGGCTTTCTCGTGATTGTTACGCGATTTCGGCCCGCCGAGGCCTGTTTTCAAGCTTAAGAGTGAGAAAAGTACCTTTTCTAACCTAGTTTTCAAACCAGAAGTCCCGTGCTAGTTCCGTAAGTTTCCACAACTTATATTGGTTTCTCCCGAGGTGTTGGAGGTGTTCCACAGGCCTTCTCGGGACTATTACAGGATTTTTTTTTTCTCCCGATGGCCTATTTTCAAACTTAAGTGTTTAGGAAGTGCGTTTTGTGACTTAGTTTCCAAACCGGGAGTCCCATGCGAGTTCCGTAAGTTTCCACAACTCACGTTGGTCCCTCCGTAGGTGTTTGAGGTGTTCCCCGGACGTTCTCTTGGCTGTCACCCGATTTTGGCCCCCCGATGGACTATTTTCAAGCTTAGGTGCGAGAAAAGCGCCGTTTCGGACTTAGTTTTCAAACCGGGAGTCCCGTGCTATTTCCGTAAGTTTTCAAAACTTACATCGGTCGCTCCCGGGGTGCTTGACGTGTTCCCTAGGCCTTCTCGTGACTGTTACACGATTTTGGCCC
>MSTRG.6134.1 Scaffold1125 580328-583937
TCCACGTTGACAAAGCAAAAACTTCTAGTATCCGAAAATCGTCCATGTTGACAAAGCAAAACCACCTCTAGTATATTCTTTTGAACCCGGCTTCCCCACCATGCACGTGTTAAAAAGTTCATTTCTCTATTGTTTTGTTCTATGCTTTGCAACTCTTTTCACGTTGTACATTTTTCAACCAAACGGCAACTTCTCTCTTTCACTTCTTTCTAGGATTTAACTCTTCATTTACCAATTGTGCGTTAACATCGTCCTCTAGAGAGTGCAATGTTTCCATCTATTTTGTGAAAGTCTGGACAATTTCATCAAGGTGATTGTGATAGTTTAGCCACTCAGGGCACTCAACAATGAACATCCATATATTATGCTCTGTAGGAAGTTTGCATCTACAAGACTACCTATTGTAAAAAATGTTAAGAATTTCATCACCATTGAACAATCTAACGTAAAGAATGACAGTGTGGTGATTAGCACACCAATTACCAGAACACGTAACGTAATAAAACTTCAAGAAAAAGTCTTTACAAATAATCAACGAAGTTTTATAAACCTAATATTTGAGTGAAGAAATTACTTAAGTAAATAAAATACCAAATATTACATTGGAATTAGAGGATACATAATCATCCATAACATATAATAACTAAAGCTTGCTATTCAAACTTTCAGAATTAGTTTCAGTAGGTGGAATTATAGATTGAAAATTGAAGAACATAACCAGTATTGCTAGGACCAATAAGTATGTTAATATTTCATGCATGAATGAATATGAGGTTTGTAGTACCATATTTAGCACGCCAATATTCTTCAATAGTCAAATAAATAAAATTAATTAGTTGATAATTATTTATCAATAATATATTACTTTTCAAAACTACCGCTTAACCGGTAACATCAAAGGACCTAGAGTTCTAATAAATTAAGTTCTAACAAAATGTGAAATTAGTCCTAGAAAATGCTCTCGAGTTTTTGTATGTTGATTCAGCCCATGCTTGTCTCACATTGTCTCTCTATATAAGCCACCTAAACTTGATCCAAATAATCTAAAGGTCTCTCCACTTATTGTCAATTTGAGTTAGATGCCTGCAAAATTCTAAATTTTCATCAGAGCTAAGTGTCCTAGTGCCCTAAGTCTATGTACACAGGTTTATCTCCTGTCTCATCTCTGATCTCTCTATCACCTCTACTCTAGGCCACCCAAACTTGGTCCATGTCAAAGTTTAAGTTATCACCTCTACTATAAAGGGTATACCCAAAATCTTCCTATGTGAATTTTCAGCTTAAACTGACAAAATTTTAGCCTTTGGATTTCCAAGTATTCCGAATTTCAATCACTAACACATATATCTCGAAAAGTAGATCCTGCAATTATAAGAATGCAATCTTGATGCATAAGGGCAACCCAACACAAGCCAAATCATAGATT
>MSTRG.15844.1 Scaffold1336 962785-964677
CTCTCCCCCCTTGAATACTGTTTCGTGAGCTCATTTCAGTTCATAGAGATACACATTTGATATTGGGTGAGATGAGACTTTCTGGGTGGATTTTCTTGGCAATTTCCTGGGCATTGGTGAGCCTTGAAGGTGCAGCTTCTCATCGAGATCAGCCTCTTCCTAGAATTGCTATTGATAGAGCAGTAGTTGCTCCAGAGGATCAGGCTTTTGTTAAAGCCTCGCCTTCAATTCTTGGATTAGGAGTAAGCTTCCAACGCCCTCTGACAGACTTCAGATGACCGGGCTTTTGCCATTGATAGACTTCATTCGTCAAAGTTTAGTTCACTGATGGAGAAAGAAAGACATGGTTGCAATAAATTTTTCTAGTGATGCACTTATTGTGCCTCTTTTTCCTAATTCACAGTGGTTAAATTTTTTTATAGATCCTGAATTTTCATTTTCTACCTAGGACTATTGGATGCAAGGTTCACACAAAGAAAGCTAGAAAAAAGAAAAAGAAAAAAAGAGGGGCTAATTTTATACTAATACGATGATTCTTCTCTGTTCTAGGGCCAAAACACTGAATGGGTG
>MSTRG.40394.1 Scaffold1925 119630-147187
AAAAATGGAGAATTTACACTGTTTGGTGTGAGGAGTGGGAGAGAGCCTTTAAATGAGGGTAGTTTTGAAAGAAAATAAAAAATGGAAATTCAGGTACAACTTCTAGCACTTCCCAAATTGTTATGGCATTTTTTTAATATGGTTTAGTTTTGATTTGAGTTTGTATGCTAATCAAACAACATATCTATGCTTCTCATGGAACCTATTATTTCAGAAAAGTGTATTTGCAGTTGGCATGATCTGCTGTGAAGAAGAAGGCCGTTTGAAGGAGAAGCCTGTCTTGCTGCAAAGCAGATTATTGCAGCAGGTCCTT
>MSTRG.136973.1 Scaffold736 443440-443818
TTAGACTCAACTAGTCAGAGAAAATTCGATCTAGAGACTCTAGACGAATTTTCTCTGGACTTCACAGAGAAATTCTAGTTTACAGAGATTTTCTCTGGTCCAATTTTCTCTGAACTTCACATTTCACAGAGAATTTCTCTGGTCCAATTTTCTCTGAACTTCACATTTCACAGAGAATTTCTCTGGTCGAATTTTCTCTGGAC
>MSTRG.48563.2 Scaffold2153 2978115-2980189
AAAAGAATGAGTATATATGGGTGAGGAGAGATTCAGTAGAAGGGAAAGAAGAGGGGAAGGTTAAGGAAGCAAAATTTTTCTACCACTTCATCACCCATTTGAATCCTATTATTAAATTATGTCGAAGAAGGAACTGAGGCTGAAATTGGAGCTGCTGCTAATATCGAACCTTGGCTAACTTAGAGTCAAGATTTTATCAAAATAAAATCCTGTTATTTCTTGAATTCGTGTTTAACTATGTTGTGACGTTGTGTATGAACTTGTAGTTTTATTTTGTTGTTGGACTTGACTATGTAAAAATTTAAAATTTCCTAATTAGTAGTTAAAATTTTATCTAGCAAGTTATTGTTATTTAAATTTTATGATGTTTCAAAAAAAAATTTGGGGC
>MSTRG.114711.1 Scaffold507 1312745-1313085
CGTCAATCCTTCAAAAATTAAAGTTATTTGCAAGAATTGAACAACAATGTTTAAGAAGGATGCGATTGAGTTACTTGTTCTTATTAAAGGTCATTCAAAATTGAAAATATTTGCAAGCTTGCAAATAAATTTTATCCCAGTTACTTCATAGAGCAAGAAAACTGCATTTGAAATTATAATTGCAAAACTATATTGGGTTTCAAAAGTTGTCAAAATTTCTGAGTTGTGCCAAGTGTTGTTGAAAACATGATGTACGGTGATCTTCTATTCTAGCAAGTGATCTGGGCACATCCTATTGTATTTTGATCATATTTTTTCAAT
>MSTRG.43248.1 Scaffold20036 209415-210711
CGTTGTCTTTCCTTTGATTGTTAGAAGATTTTAATGTTTAGGATGTGTTTGGAAGCAAACTGCAGGTGAAGAATGCTTTGAATGCTCATTTGAATAGTTTCTAATAACATACTAGCCATTTCAGATGCAGAAGGTTTTTGTGTTTTGAACAAAAACAAAACAAAATGAAAGAAGTAAACACAATCTACAAACATATCACATGGGACTTTTTAAAGGCTCA
>MSTRG.153451.1 Scaffold968 216700-217143
AGTTGATACTGCAGAGAAAGATTCAAGCTCGGCATCATTATTTTGCAGAGTCAAAAAATCTGATGATGAAAGATGGGATGGTCAAGAGGATTTGTCAACACCAGTATCACTAGATGGATATCACTCTTGAGTGAAGGAAGCGGAAACGACTAACCATGTAAATGCCATAACTGACAAGTCAAATGTCCTGCCATCAGCTAATTTAGCATTTTAGTTGAGTCCTGCAAATGTAGAGTTTCTGATACTGTACTTGCTTTAGGTGATGCAATATCAAATGATTCTGTTGGCTTGGGATTGAGCTATCCAATAAAGTTTCTGAATCAGAAGATTAT
>MSTRG.32561.1 Scaffold1755 224564-224893
TAGTTGAAGTTTCTGAGGCCATTCCTTCAAATGGTTGTATACATGAAGAAGTGAAAACTACAGATGAAAATTTGAGAAGATCAAGAGAACCTTGAGGAATTATTAAATGAAATGGCATTACTGAAGGAGAGGAACAAATCAATGGAAGGTGAACTAAAAGAAATGCAAGAGAGGTATTCAGAGATAAGTTTCAAGTTTGCAGAGGTAGAAGGTGAG
>MSTRG.42574.1 Scaffold1987 856102-856935
GAGTACCACTTGCCGTAGAAAAAATGAGTAACAAAAAAGAGAAAAAGAAATCAGGTCGTACATAGACACTGATTAATTACATTCTTATATTCCAATTTAAAATTTATATTCTTATATATTTCCACACAAAAAGAAAAGTTTTTATTTTTATTATTTATTTATTTTTTTTTAGATTGAACTAGGGCCGGCCCGAGCTAAGGCTAGTAAGGCCTGTGCCTAGGGTCCCAAAAATTAGGCCCAAAAAAAGGCCTC
>MSTRG.24255.6 Scaffold1538 950073-956144
CGATCATCTCTGCTGCTTCCATATCTCATTCCGAAATACTCCAAGACTGAAGAACTTCGAAGGTGCTAGGGTTCCATGTCTATTCGATCATCTCCTTCCAGAAATACTCCCAAGAGAGTCTGAAGAACACTTCGAAGGTGCGATTGAAAGGTTTAATCGAAGGTGCTGCTGATTGATTCTCTCCTTCGAAGGTGCGATTGAAGAGGCGATTGAAGTTGGTTCTGTTACTAAAAGCATTGAAGCTGTGAAAATATCTAAACGTGCTGGTTCTTCAATTGCAGACCTTCCAACTGGTTTAGATACGGCAAGTTATGCTCTTTTTAGAAGTCTCAATTGTTATGATTGAAGTCATAGTTTGAGAACAAAACTTTAGTGAAATCATATTTTCAAAAAATGGGTTTGGAAAACAAATTCCAAGAAAACCAGTAGCAGAACCATCATTTTGTTTTGTAATCTACATACTGTATGGTTCTGCAAATAAACAAAACAAACTCCATATGAGACTGTATGTAGACTGCATGGTTCAATCATCAGAAACATGGGTTTGGAAAACAAACTCCATCATCCATCATTTTTCAATCTTTGTGCCACAAAAAGATCCATCAAACCAGTAGCAGAACCATACTTTTGTTTTGTAATCTGTCAAGGAGGTATCTTATAAAAACCTATTTATTCAGCATTCCTTTCTTATCAGAGATACTTTTCCTAAATGAATCAGGAAATCCTGTTGTGCTATATATGTTTATTAAGAAACCCACACAATTTCATGTGGGAATCCTTACACGTGGTTAACTTAGATTGTGATTTTACATTGTGTTGGGCCATTTGTGTTAACATAGAATTTCCACTTTTTGTCTCTCGGTTGGTAGCTTGCTAATTGTTTGCTAACTCTGAGACTTCAATAGAAACAAGGGTAGAACCAAGAATTCCTAGAACAGCCAAATGTAAAACTAATTACATAATTCACCATCCTTGATAATTGTGTATTTATTCTGAATGCACATCCTGCCTTAGTCCATGAAAAGAAAGTGCACTATCTAATTTTAGATTTCAATCAATCATGTTAATGACACTAATTTCTTTATTTAACATATGGGTTCTGAATTTTGATGCCTATTTTTGGAGATTTATGAATATGACTATTGAATTGAAGGGGATCTGTGATTTGCTTCTCCAGCATTTGATGAAAGATGACTTCATTCTCTGTTATACCTTTATTAGCATGCTTCATTAGTTTACAAGTAGTAATGACATTAACAGTATAGCGATCCCGATTTTCCTCTCCTTGTTTACTATATTCCGGACTTAGGTTCCGTGGAGTTGGTTGTTGGTTATATATTGTTGTCATCCTTTAATTCCCTATGTTTGAGTTTTAGGATGTGTTGGGCGCGTTTCGAATAGGTTGGTTGGGCCTTGGTCTCATTCCTTGTTGCCCAGACTATTGGTGGTGCGCTCGAGCGGGTCCTTTTGCGCTCGAGCGGAGTTTGCTTTTGTTGTTGGTACGCTCGAGCGAGTCCCTTTGCGCTCGAGCGGAATTTTCACACTTCCAGTATCTGTGACTCTGCAAAACTTCTGCAAACATGATTTTCACGCTCGAGCGGGTTTCCTTACGCTCGAGCAGGTAGCGCTCGAGCGGAGTGTTCATTTTTTGTGAAAATACTGGGAGGGGAGAATCTACGCTCGAGCGGACTGGTTTTCGCGCTCGAGCGGATATATTTCATTTTTGTGTCTGATGCTCGAG
>MSTRG.138278.2 Scaffold751 83662-85260
AAATGACAATAGTGTAACCAACAGGCGTATCTCAACGTATTTTATACGGAGAGAGGGAAGGTTTTAACCAGAGAAAATGACAATGGTGTAACCAACAGGCATATCTCAACGTATTTTATACGAAAAGAGGGAAGATTTTAACCAAAGAGAATGACAATGGTGTAACCAACAGGCGTACCTAACCGTATTTTATACGGAGAGGGGGAAGGTTTTAACCAGAGAAAATGACAATGGTGTAACCAACAGGCGTATCTCAACGTATTTTATACGAAGAGAGGGAAGGTTTTAACCAATGAGAATGACAATGGTGTAACCAACAGGCGTA
>MSTRG.45064.2 Scaffold2069 91499-108048
TCTCTGTGTAAGACCTTCAAGTGAGAATATTATTGTGAAAGTTCAACAATTACAACCAAGATTTGTAGAAAAAAAACTATAGAGAGAGAAGAATTAGAAACTAATTGTTGGAAGATAATAGTAGAATAATGATGATGGTTCAGTTAGATTTGGAGTTAAGTTAGGTTTTGGTTGGAGAGATTAGCAGACAGAGAGAGAGAGAGAGAGAGAAATTGAAAGAATCGAACCTGCAAGGCTTTGACGAAGCTCTTGCTACGCTCCATGGAGACCTCGTCAAACGTCATCGATGCTGGATTGTTGTAGTGCTGTGGTTGCTCCAATTCCATCTCTCTCTCTCTCTCTCTCTCTCTCTGTGTAAGACCTTCAAGTGAGAATATTATTGTGAAAGTTCAACAATTACAACCAAGATTTGTAGAAAAAAAACTATAGAGAGAGAAGAATTAGAAACTAATTGTTGGAAGATAATAGTAGAATAATGATGATGGTTCAGTTAGATTTGGAGTTAAGTTAGGTTTTGGTTGGAGAGATTAGCACAGACAGAGAGAGAGAGAGACAGAGAAATGTGTGTAGAAGAAGCAACCCCGGGAAGC
>MSTRG.58573.2 Scaffold2450 936943-1184288
GTTTGTATAGTCTTACCAAAAAATATAGAATGGACGAAAAAGTCTACATGAACTATCAGTAGCGGAGTCAGAAATTCAAGGCAGAAGGGGCACATATTACACATCATTGAAAAGAAAAGAAAAAATCCACAATATAAGGGAAATGGTGTAAATATGAAAAACTCAGGGGGCATGCGACCTCCCTGGCCTCAAGGATTTGAGGTTTGGAATTGAAACCTCAATGTGTTGCAAGTTTTTACAGAACTCAACACACAAGTACTCAATCAATGGGCAGCTTTTGAATTAGTTTCTTGAAAACATTGTCTCTGATCTTGGATTCACTCAGAGTCAGTTTTTTTAAACAAGGTAGGTTTATAGAACAACTGGGTTGGATGTTACAGTACTCCAAATACAATACAGTGGTTGATTGAGCAACAATCACTGTATTGTCAACACAAGCGTTAAATTCAGTTAAAGCATTAAAGTCTATCACAACAGTTAAGTTCAGATCATCAGATCGACAACACAAGCGTAATCATAATGTCAATCTTCAGCAAGGAATATCAAATTCAACATCAATTCATTCTACTAAACCACCGCAAAATCATAGAAATCTCGAAATGCAAGCGAAAATCAGCATGTAAAAACCAGAAAGCAAGAGCTAGAGAGAGAGAAAAGGTACCGTGAAAACGTTCTTCGAAGTAGACTTTGACTGAAGCGATCGCAAAGAGGTCCTTTTTGTTCAATCCCAAAACGAGCAATCACAGAAGTGAAAACACATTCAATAAGGGCATGAAAACCCTAGAAATCAAAATCAAAGAGAGATGAGAGAGGAGAATCGGAACACATAAATTCAAGGCTTAGAATCGAAT
>MSTRG.120942.2 Scaffold5689 11199-14128
AAAAGAAGCAAACTTGAGTCTAACAATAGTTCATCTAACAAAGAGGAAATTGTGAAATCACCCTCGGTGAAGATTGCTGGGGAAGCTACGATGACACCAGCTAACCTCTATGCGGTGCTCCTCCAACAAGCTCTTCATCAATTCGAGCCACCTGTGCTGCTACAGATTAGTTTGCATTTGGGCTGAACTCTATATGCATTTTTCTTTCACAAACCAGTTGCAAATCCAAACAATCTGCTGCATGAGCATCTTCTGGCCACTGTGAATTCTGAAAAGTTCTCAACGCAGCTTAAATCCCTCTATGATGAATCTATTGATGGAATTGGCTCCGAATTTCCTTTTTAAGGAGGCCTCAGATGCTACCCTTTTGAGTATGTGATGATATCTTCGCATATCAATATTAGACCTTGCTGTTGATAATAAAACAAGCTATAATATGTATATATAAATATATTTTTATTTGTATTGTCAATAATTTTGTTTTGTTTTAAATATATTTTTGTATTGTTGGAGGATGTTTTATATATTTCTGTAAAGAATATTTGGTTGACACTGTATTGTTACAGGGTAC
>MSTRG.100251.1 Scaffold4154 431036-439552
TTTCTGAATACCAACACGTGGCATGGTGACGCCGACGTGTCAGCCGAGGTGCCACGTGCCCTGGTAGTTAAGCCGAGGTAATCTCGGAGAAGCCGAGGTCATCTCCGAAGATATCGGAATCCGAGATAAGGGGCAAGAGTCCTAAGGCACAAAGGGGACTGAATCAAGATAAGGATAAAACTCTCAAGGAGTTATCTTTATCACTTAAAAGAGTCCAGAGTAAACAGTGAATTAGAATTCATAGAAGTCATACTTCTAGTGGGACTTGGATTGAGTATATTATAAAAGAGAGGCACCCCCATGGGTCTAAGGTATGTAATTTATACTTTGAGTATTCAATTTAGTACTTGATTATCTTTGAGAGATATACTGACTTGATCGTCGGAGTGCCCCCGGGTGGAAGAACCACCGCCGGAGCTTTTTTCTTTCTGTTTCAGGTTGCTTAAGCCATCTATTCTGCTTGTGCTCTCCAGCTGATCACTAAACGGGCAGT
>MSTRG.90355.2 Scaffold3690 3542970-3545996
CAGATGTCTTGCTTTATTGACAAGTGCATTGAGCGAGTTTCGAAAAGGTGAATTTTGATTCGAATCTGATCGCGGCTAGACAAGAAATCAAAGCACACTCTGTAGATTCTGTACGCATTGGTAATGTAGCCTTGGAGTAATTTGGATTTTTCAAATCGTAGATGGCTCTAATTCCACTGATTCAACACCCGTGTATTGTTGAATTTAAGGAAGCATGTGTAGAGAAGGATATGACAGGATTAATAATTAAAATACACCGATTGTCCATTGGTCCTTTACCTTGACCGAACCGAAGAGATGGCTTTTATACCGAAATGAGACTGTACTCGGAAAAAGTCCGCCATCGTTCATCCCCCTCCTTGTCAATCATCGGCGAACTCTGGGTTGATTTATTTGGGTGGCTGGGCAACAGAGGACCGAGTCTATTGTAATGCTCCGATTTGTGGAACTGCTCTCAAATCATTGAGTTGAAGCTCATTTTCAATTTGATCTTTAAATAATCTTTGTACATGGACAATGTCATTTATAAGTTCTCAATAAATC
>MSTRG.146247.6 Scaffold8614 249258-301869
GTTGTGTTTAAAATTGTTTTGGCAGCGATTATTGCTTGGTGCTTAGAGTAACAATACACAGATTGTTTTGCATACATCTTATCATCCATTTAATTAATCTGAACTTTGCTGCCTCATTTATATTTAATTGTTAGTGTCTTTTGTATGACTATTTTTTATTTTTATTACTTTTATTTATTTATTTTTGGGGGTGTTTGCAAAGGATTTTAAGGAATTATTCTTAGTTCACTTCATAGAATATCAAGTCAGTGGGTTTAAGAAATTAGATTATCAAAATTAGTTGGAATGAAAAGGATGTCCTTTTGTATGTAACTTCCAATAGGATTGTAGACTTTGACAATAGGATGTCTTTTTGTCTTATGTTGAGAGCCGATTGCTACAGAGATTTTTCTTTTTATATTTGTGATTGATGATTTTAAAAAGTTCACAATTGTGGTAATCTAATTCCCAATACCAATCCCTCTATAGTCTTGATACCGTTATACTGCAGCAAATAACAAAATGTTACACAATACCTCTACTTAAAACCATGATTATTGCCGTTTAGAATTTTTATTTTTTAATTTTCCAAGGCTCCTTTTCAATTATATATATTTAATTTAGTAGAATGTTTAAATTTTTTTTGGCAGCAATTATTGCTTGGTGCTTAGGGGAACATACACAGATTCTTTAGCAAACACCTTATCATCCAGCAGTTATTGCTTGTTGCTTAGGAGAACAATAAACAGATTCTTTAGCAAACACCTAATCATCCAGTTTGGCTGGGGCAGGTGTGGCCCGCACCTACAATTTTTTGAAAATTCAAATAAGGGCAGGCAAAAAATTTCCACACGTGCGGGACCAAATCCGCACGTGTAGTTCTGGGTTTCAGGAACGTATCTGTTCAAGGGTAGGAAGTGTTCTAGCTAATTTATTCCATTTTTCTTGGCTTGGAACTTATGGAAACTCACCTAAAACATGCAAAATCACTAGGGAATATGAAAATACAATTGTTTTACAAATCAAAACTCCAAAACACAATGAAACTCTAAGCTTGAAAGATCAAATTCATGACTTAAGTTATGAAATCCTTTGTACGTGGTTCCCTTTTCAAAGCCTTCCTTCCTTCCTTCCTAGAACATGGATTTAAATATGAAAACTTCTTGAAAAACAAGAGAAGATATGGGGATTAAGATTCATATGCATCGGAAATATGAAAAATTACATCAAAAGGTTGAAATTTCTAAGCCATATGCGGCGTTCTTCATTTTAGCTAAACTTCCTCCATTCCTTCACTCAAATCTTCATTCTTAAACCAAATTGATCCTAACTTTTCCTTGATTCCTGATGTAAGGAGGGTTTACTAGAGGATTTGGGATAGAAATCTTACCTTAGAACACTTCTAGGATGGATTTTGTTGAAGTTCTTTGAGTTCCTCCCTTTTCTCTTTTGTTTCTCTTTTCTCCTCCTCTTTTCTGTTAGCATATTATATTAGCCGAAAGTGTTAGCATATTATATTAGCCGAAAGTTACACTAGGGTCTGTAATCATTTTATGCCCTCAGGAATCATCTTGTAATTGTATTTCTTGTAAACCCTAATCTTCATTTATAAATAGGGGGTGATATTCTATCATACCCTAAGCTGGTTACCTAAGCTTCATGGTATCAGAGCTACACCTCTAGGGTTAGGGTTCAAAACGTACCTAGTTGGATCATCTGCTGGGTCGATCTTCAGTCACCGTCGTCACTCCGTTTCGTCTTCATCAGCCATTGGATCATCTGC
>MSTRG.137817.1 Scaffold7452 823943-830619
TAAGGAAGCTAGAGAAGAAGAAGATTTAAAGGGGAAATCAAATCTAATTGCTGAAATTAAAATTTGAGGTATGAAATTCAAGCTTGATTTATGTAGGATCTTCTTTTTATGCTTGAGATTGAGAAGGGTTTGGAATCATGTTCATGAAATTAGAGAGAAATTTGGGTTTGAGCAAGAAATGAGTTACATACATAATTATGGAAAATTATGTTAAGTTTCATCATTTTAATTTAATTTTGGAAATTGCATGCATAAGAAACTCATCAATCAAGTGCTCTAGATGAGG
>MSTRG.120286.1 Scaffold5623 64002-76049
TCGGGACTGTTACAGGATTTTGGGGGGCCCCCGATGGCCTGTTTTCAATCTTAAGTGTTTAGGAAGTGAATCTTTTGACTTAGTTTTCGAACCGGGAGTCCTATGCGAGTTCCGTAAGTTTCCATAGCTCACGTTGGTCATTCCCTTGGTGTTCGAGGTGTTCCCCGGACTTTCTCTTGACTGTCACACGATTTTGGCCCCCCGATGGACTTTTTTCAAGCTCAGGTGCGAGAAAAGTGCCGTTTCGGACTTAGTTTTCAAACCGGGAGTCCCGT
>MSTRG.11807.2 Scaffold1235 177811-188918
TGATGAACTGATGCAACAAACAGAGTAAACTCAGATGCGGTGAGCAGATGGGTCAAATCCCAACGAACCAATGATGGGTCGTAGGATGGGTTGAACAAACAGAGGTTGCTTGTTCAAACTCAGATGAGTACGACCTCAACAAACCAGAAATCAGGACCAGAGGTCTGATACCATGTAAGATTTCTAAATGGTTTTGTATATTCAATGTGTAAACATTACATAGGGTACATCAATTTATATAACCCTAAACCTATAAATGAAAAAGGAAATACAATCAATTGAAATATTTACAGGGCTATAATCATCCCTAATTCCAAATATAGAAGATACGTACAATATATGCAATATATTCTCATAAGTGGTAGGGAAATGTTTTACACAATCATTCAATTCTACAAATAGAGGCCTTGTTCTCAAGCACATGTCCATGAATCTAAAAAGAATAAAAACACCCTTTCTAAGATGGCAACGAAGAAAAAAAACGGTCATCAAATTGGAGCCCTAGGCAAAAGTATATAAACTATTTAATTCATCAAAGCATCCCAATGAAGAGAAAAAAAGGGCTCACATCCCACCCCATTACCTACATTGGCATTCTCCTTGCCCTAGAACAAGTAGAGGCTGCGCCAAGCAATGGAAGGTCTATCAAATTTATTTCTCTTAACAAACTCAGCTGAGAGCCTCATCCATCTAGTAAGCCAAAAAAACCAATTATCTTAATGTGATTGGCTAAATTAAAGCTTCCACACAAGTTCAAAACTTTAGAGGCCAAAACTTCCTTAATGAGCTGGAAGCTGGATTTAGGTAAGTCCTCACTCTTCCTAAGAAATTGAATCTATAAAAACAAACACCACTAATATAAGACATGAGAGCTATGAAACTAGCCCATTCTTGGATATTTTTTCAAGAAGATTATGCAAAAATAAATTAATAAATAAAAATTAAAATACAAGCATATCCTTGGAATTGTAAATCACGGTATTTTAGAAGGTTACGTAACTTAGAAGTCTTTATTATTTTGTCATTAGATGCAGATTGTTATACGGTTTTGGGTAGAACTCACCCCAAAAGCTAACTATTAAGATGAGAATGCCCTCACGCTTATATGCTTAATATTACTTTAGTACTCATGCAATGTGGGACTTTGCGTTATCCCAAAAGACGAGTCTATGTAAAATACAATTGTATGACATCTATTTCCAAAATGCTAATTGTGGCAGATAAGAGCACTTCAGGTTTTGAAAATGATACTAGGGTTCAAGTATAAGAGAACCATATAACATAAAGGCATATGTCATAGGAAGATTTTGCGTATAAATAAAAACAACATTTGTGCTCACTTCCAACCCTCCAAATATTAATGACCATAAAGGTGCTATTGTCGACAAAAAATTTTGCCACAAATGATGATTTAGAAGTTAATAAGGGTTTGTTTGGGAAATGGGTATTTTAGTGGCTTTTTGGTTTTGTGGCTAAAATATAAGGTGGGAAAAAAAATGAAGTGTTTGGGAATGGCTTTTTGGTTTATTACAAAAAAATGTGCAAAAGTAAAAATAATGGGAATGAATCTTTTACTTTTTTATGAGTTGAAAACTTTTTGGCATTTTGATTATTTTAGTTGCTTTTTTACTAAAATTTTCTCATCCCGAACGGACCTAAGAAAATTTAATGAAAGACAATCATATCACAAAATTTGGGTTCTTTTACAATGGTTTAGAAATATGCATCATTCCACCTCATGATGTTAAAATACCCAACATGCAGGACTGTCAGATAGAATTGGAAACAATTATTTATACACTAAATCACTCCATAATAAGCGCTCCGAACAATATGATTAGGAAAGCTCTTCACAGCTGATCCAGAAATTATTACTGGAAGAATCGATTTTGAACACAAATTAAATCACACTATATATGGAGCGCAACCAATAATTAGAGATTGGCCACCAAAAATTTATCATTTGCAGTTTAGCAATAAGTCAAAAATGATGAGGGGTTGCAATCAATGGGTGTTCAAAATGTAATGCAGATATTTGGAGGATGTATCAACAAGTTAACATAATGAATGTAAAATATGAATTAGACACGCAACAAAACACAAGCATTCATAAATGTAACAAGACATAAAATTATCATATATTCTCTCTCTTCTCATCACAACCAGGAGAGAGAGAGAGAAAGAGAGAGAGAGAGAGAATTTTGAAGGGACTCACAAGGTGATTCCATGATCTCTGTGTGGCGATAAATTTGATTTGGTAGTTAACGAGAGAGAGAGAGAGGGGTTGACGATTGGTGATGAAGAATTACCAAGCAATCAAGCTTTATGTTTGTTATGTATTGTGAAGGAAAATAGAGAAATTTTTATATCGATTGATTCATCGCCAGATTCATATGGTATTTATTCATTCATGGTGTCTCACTCATCTCCACACTGCTTTTGCGGGGCACTTGGATTGGAAGATATGGATTAATAATATCC
>MSTRG.82477.2 Scaffold3355 1355850-1359253
ACTCCGAAAAAGGAATATCTAGTAAACATGCCGCAAATGCAATGGAAATAGCAAAAAAAACTTTGAAAGACAGGTGAACACTTGAAGCACAGAAAAAGATTTATTAATGCATATTAAAATAATTTCCAACAACGCTATTATGGCAAAAGCACACTTAGAACAGTTTCAAAGCTGATATTCTTTTGTACTATAAAATAATCATAGACAAAATATAACATTGTCATATGAACTCAACATTTTAACACAAGTAAAACAATTCAAAATAAAGGTCATAGCAATTAGAAACTAATATTCCAAAAGATCTTCCAGTTATTCTGATATTGGTTCACCTCTTCTCCTTATCTACTTATTCTCAAAGAAATTCGAGAATTTTTTATGCATATGCTTTTGGGTTCTAAAAACTCAACAATATGGCTAAAAGAATAATAACCTTTTGTTCTTTTTAGACTATATTGCTGCCGGCAATAAATTCAAAATAATAATAATAATAACCATCCCAAACATTTTACGAGCAGTTTTCAGTTTTTTATGAAAAGTTTACTTTTATGAATATCAGCATTTTGGTTTTGCAACCAAGCTTTATTGTACTAGAAAGCAAAGACATTCAGCTAATTCCATGCAAAGAGAATTTTCATTTCTGTGCAGATAAAATAGATTCAAAGAAACTTTGATATCAAATGCGTTGTCTAATTCCCCTGCTAAAATGAATATAGAGACCATCACTCTGGTCCACTACTGCCATATATGACCAAGCTTTGAAACCATACTGTTTAAAGTCTCATTTTCAAAAGAGATACCTACAAAATTAGGGCCACATTATACAGAAGCTCCAACAACACAAGGAACTAGACTATCTAAACCAGTAAAGATCATGTTATTGCCCATAAGCTACGCATGATACGAACATGCCGACACAGGAAATTTCCAAAATATCAAGACATAACACAATAGTAATCCAAAAAAGGGCTCAATATCAAATGTTTCGACTCCAAAATAAAAACTACACCTCCATTAAAGATTCTCCTATTGTGCTCCTAGATGCATCACCAAAAACAAATCACTAAAGACTCCGGCCCATTTCTTTTTTCTTCCCTTTTTTTTTTTGACAAGTAAATATATTAGAAAGGTGCCAAAAAAAGGAGCACAGTCACCACTTTACACCGGCTATGTTTGATTTCGGCTTGGACTAGGCAGATAAGATACCCCCGAATGTGTAAGCCAGGCAAAGGCATTTTAGTCATTCACATGCAAAAGAGTTATCCCCGGTTTAACTGTCCCACCCCTAGGACAAAATAATCCCTCATATGTAGGTAAGGG
>MSTRG.114899.2 Scaffold509 2232215-2236529
CTGCCTTCTCCAAATTCAGATTCTGAGAAATTATGATCCTTTGCCAATAAAAAATTAAGAAAACAAAAATAAAAATTCCAATCCTGTGCACAAAATAACAAGAGAAGAAACAACTGTGCCAGGTTTGAAACCAATGTGGCCCCAAAGACAAACAATGATAATAACAATTACTAAAAACAGACAAGGGAGGACAACATTTCCAACTTGACAATTGGGACAACAGACAAACCATATGTGGGGGCTCCAATGGTGCACTTCACCAGGGTATGCCGTCATCCTCAGAGAGAGAGAGAGAGAGAGAGAGAGAGAGAGAGAGTACAACCAAGCAGGTTAGCCTCATGACTTGATACAACACATGATTGCCAACTTTACAGCTATGACAAGAAGCGATCCCACATGGGTAGTTCCTCCTGCCCAATTTTGCCTCCATTTTGCCTTCTCAGCCTCATCTTTCCT
>MSTRG.60222.1 Scaffold2513 1080052-1085080
GATTGAGTATTCAACTCATGTTTTAAAGAGTATACATCAAAGGTTTTGTTTGTTCTACAAAAAGAGAGAGTTGTTCTTCGGTGGATTCTGAAGAATTCGAGCCTGAAGCTTTGGTGGATTCCAGGGTGGCTCATCGTAAAGACAATTCCGAGGTGAAGACGGGTTGGAAGAGGCACATAGAGGTTGGTTTAATTAGGCGTGGATTCGCTAGGTAATTGAGAGTATACCTGTGTAATTC
>MSTRG.61326.1 Scaffold2555 1381059-1381456
TACAAAATATCCAGGACGATTATCCTGATGCTACCCTCACTCTGGCCAACAGCCATGATCTTCTTCAAGATATATTGGCAGACACTGAAAAATATGGGTTTACAGATGTAAAAGATCCGTGTTGCAGAGGCTATGTAAATGGGAAACTAGCTTGCATCCCAAACTCTACACCATGTGACAACAGATGTCACTTAAGAAGATACACATTTCACCACACCAGTGAATTTGCAAATTGTATCTTTGTTCGACACATGCTTATTAAGGATTGAGGGTTCAACAAGTTTGCTAGTTTAATTTTAATTATGAGTGGTGTGGTAGTAAGAG
>MSTRG.136558.1 Scaffold7293 588995-589342
TGGCCGGCCATGAACTTTTAGGGGCCTCCCAGGTGTGTAGATCACAGATATGTGGTTGAAAGTTGGCAACATTAACTCCAAGGTGTTCAACATTAGCCCGGAAGTTGGAAAAACGAGCGCCGGGAGGCTCCGGAGGAGAGATAACTGGTTGCTGCAACAATTGCTGGCCTCCCACCCTTCAGTGACCTTCCTGGTGATAAAACAGAGGTACCTG
>MSTRG.152780.3 Scaffold957 1113134-1113434
ATTGCAGGTTAGTGGTTGCTCCCGGCGTCGAGTGTCTGGAGGGTATGTTGATGACCTCCTTCAAACGGTTGACCGACTGCTTCTCATGGTACGGAGGAGACAAATTGCTCTAGTCACTCACGGGATCGAGGTATACTCTGTCCACAGTTGTTACAAACTTGTCCATAATCCTGTTGCATCTATTCTAATATCTGTACTCTTTTTAGCTTGAGCTGG
>MSTRG.58601.1 Scaffold2450 1738179-1743518
GTTCTTGTTACTATGTGCATGCCAGATGTTATAATGAGAGGAAACAAAAGAGGTTAGCCCTCACATCTTCAGCCTATGTCTCACTTATGAAAAAAACTTCTGTATTTTCCTGTGAATTACTAAATGCAATTTCAGCTATAGCATATAGAGCAACAACTTTTAAGTGCTGCATAAAATTGGCTATTATCATATAGTTGCAGGAAAAAGAAAACCAATACACATGAACTAAAAATTATGCACACATGCACATGCAAACAAGCACATAACATATATATAAGTTTTAAGACAGGCCAATACCAACTG
>MSTRG.15332.1 Scaffold132 658262-660618
AAAGATTTAGATTTTATGACCAATTTTTATTTTTTATATTTATTGTAACGAATTTATTTGATGTAAAAACGTGTAGAGATATGAGACGACTAGCGATTCCTTTGTGTTTTTCAGCTATGTTAATTCACAATTTTATTATTCTTTTTCGTTTTCCTCAAAGACGTTTGGTTCATACTTGGCAAGGTAAGATTGTTTGTTTGTTTTGATTTCTGTTGTTTTTGGTTGGGTTTGTTTTTGGCTCATGGTTGTGTTAGCATTTTTAGGTTCAAACGACGCTGCTCCTCCTTCGGCTCCCTCCGAACTAGTGGGTGTACGATTCTTTTGGTTGTCTATCTGTCTTGGCTTGAAAATGGGGCAAGTAAGACTCTTTTGGGTTGTCTCTTTATTAGTTCCACTTTAGATTTCTTTTGCTGTGTTTCTTTACATGTTTGTACCAACTGTTTTTTTATTATATTATAAATCTTGCAGCTTTCTTGCTATTTTGAGGTTATAAAAATATATAAACCTTTGGTTGGATTGGAAGGGGTGAGAAAAGAAAGGAAATGACGCAACACAACACAACACAACACAGCACAACACATCACATCACATCACACTGGTTTACTGCATGTAAAGGCATTACTGTCATGGATATAAACTGTAAGTTATGAGATTTGAGGCCCGTGATTGTAGACATATATTTTAAAACATGAAGTGTTTCAACACATTTCAAAATTTTATGTTACAAATGTCCACTGTTTAGTTTTTTGGACTAAACAGTGTTGATTATTTGAATAGCAGGTTCCTATTTCTGATCTGTATTCTAGATCGTTAATTACACATTTTATATAAATGAAACCTCTGATTCATGAAGAACAAAATAAATAACATAAGACAATTTAAGAAAAATAAATATTTTATTGAAATTGTTATGGGCTTTGAACCCTCGAATACAAAGTATAATTCTTGGGTTTGGAACTCTTTACCTATTCATCGCCATTCTGCGTTTGTAGCGTAGGCTCTTGAGTTCTCTGGGCTTCTCTTCTCCTTTCTTGTAACGACTTTTTTAGCTCTTAATTTCTTTCTCTCTCTCTGATCTTCTCACCTCTGATTTTCTGATCCCCATCTTGTGTGATGGTCCTCGTATTTATAGAGGGCCATCCAGGTGATAAGAATGCCTCATCCTCAATTTGAATTTCAAACTGAACGATAGCGCCATTTGAATTTTGAATAATAGCGCTATATGATTAATCGTATATCTGATTAACCGGATTAATCTTTGGGATTTCATCTGTATGGTATCCTTGCTGTAGGCTCTATAGGTGTCATATTTTGTAGGCTCCACGTATCACTTGAGCATTTTGAATAACGTCGTTGAGATACAACGTCGTTTTATTTGTGCATTTCAACCGATCATATTGTTCTTTTTAGGAAGTGATTACCTACAACTTTCCTATCGTAGGCTCTATACGTGTCATAATTTTAGTTGAAATTTATGTGCCAACAGTGATCACCCATTTTGATTGATTTTAATTCATTTTGGACCATAATGCATCTTGAGG
>MSTRG.140204.1 Scaffold7778 471379-598862
AAATATTAATATCAAACTCTTGCCCCACTTTTCTCTTGATCCAAATATTCTTTAATCAAGTAGGTATATGGTTTAGTTTATAATTTATTTGTATGTTGTTCTTTACTTATCTTATTTTTGGTACTAATTTTCTTAGCTAGTTCATAGGCACATATGCCAAAAGATAAGGAATCTATCTATTACTATAATTTACCCTACTCTATCAATATTCTTCCAAACAGAATCTGAGTTTAGAAGGTCCCCGGCATCACCCATGAGGAAGTGATTATCA
>MSTRG.62355.11 Scaffold26 941589-943204
CAAAAAACAGGCTGCAGCCCCCAAACCCAATAGCAGCCACCAAAAAATAGGAAAATAAAACAGAGCTGCCACCATCATAGGTCAATTGGAGATCAGGCTGCAGCCCCAAAATCCAGAATAGAACACACTCAGAGCTCCACATTTCCACCTAAACACCTTCTGATCTGGCTAAGGAGGAGAAGATGAAGGGAAAAAACAAAGAGGTGGTGACTAGGGAGTACACCATCAACCTCCACAAGCACTTACACAGCTGGAATCTCTTGACAACGTGCT
>MSTRG.127342.3 Scaffold626 1494664-1495259
GGGGTAAGAAAAACAATGGACCAGGTTGAATCATCCCAAATCAAAACAACCAGATTCACATGCTCCGCCTCCTTCAAACTGGGGAAAATTTGGGGAAAGTTCATCACTTCACGCCAATGCTCCTAGGGCAGAGGATCCAGTCTGTGAGCAGGCTAAGGCTATTAAACAAACATCGGATTGGATAATAACAGGGTATATCCACAGCGCAATCAAACTAAAACCCCATGGCTCTGCGTTTTGTTCTTGAGAGGACGGTGAGAATCAAAACTGGGTATGTCAATCCAAAGCTTGGATTTTGGTTTGCCAGCAGCGCTTTCAAACCCCAGTTGTATTCCTCTTTGCCGCGTACTGACCATTATCCTCTGTTTGAGGTCTCTCTATCTCTAGACTCTAACCCACACACACTCACACTCCCTTGCCCAATATTATTGTTTGTTATTATTGTATCGTATTGTATGTGATTGATTAATTGATTGTGAGCTTTTTTTTAATACAGCCGTGCTGGG
>MSTRG.61123.1 Scaffold255 767022-767780
CACTTTCCAGGCTCACATGCAGCCATTCCCCTCTCTCTTTCTCTCTCTAAAAACCTCCTCCTTTCTCTCTCCACACTCCTTCTCATTCAACAATTCCAACTTTGTGTGTTGTGTTAGAAAAAGGTAAAATGGAACCTCTACTCTTCTTCCTTCAACTTCAACCTTACTCTCAAATTAACCCTTCCCATTATTTTCTCTCTCTCTCTTCCTTTTGCACTCTAGAACTGGAGGTGGTGGGGTTCTCTGACTCAGTCCTTTTTGGCAGCAATCTTGGTCCTCTTTGAGGGAAGGTTTCACAGGAGCAAAAGAAAGGAGAAAAAGAAGAGGTGAGATTTCTTGACAAATTGTGAATTGGGTCTGGTTGTTTTGGTAAATTGAATTAGAAGTTGGTGTTGGTTGAAATCTACTAATTGGTCTTATT
>MSTRG.67585.1 Scaffold2790 621085-622140
GGAAAAACTTAGAGGAATTCAAAGAAGTTGGGAGTGGGAATTCCAGTTCCTCTGTTTGTTTCTCACACAAGGTTGGAGATGTGCTCTGTATCAAGCTTGATTCGCAGAATGATTGGATTTCTGGACCTTCGACGCAATCAACCCCTTCCACAGACGCACCAACTACAGTGATGTCAGAGGTGGGTTTTGAAGGCTGAGCCACCAGTACAAGTGGCTGAGCAACCAAAGATGCAAGAACAAC
>MSTRG.4637.2 Scaffold1092 668414-675862
CCAAATTAGTGGCCATAATGCTAAAATAAAGGCATGAAATGCAAAACAAAGCAGACACATGCATTGGCCCATCAACTAGGCCTAAGAGCACAACTCTCAAGAGTGCTCAAAGAGTGACAAATGTTGAAGTGTAACAGCACCATAAGCTCTGAAATAAGGTATGAAATGATGCCAAATCATTCAAACAACACAAGTAAAGCATGCAAGAGGGCCTAAGACACAAAGCCATTAAAGGGACTATACAAAGGGCATGCAATACATGGCACAAATGATTGAACCAATCATGGACAGAGCTTAAATAGGTCTAAACAAAGACCAAAACATGCTACGATAGAGGCTCAAAGACCTAGGCATGCAAGCATACACATTAGGCCATAAACAAGGCAACAATACATAACACTCAAAGGCACTTAAAGAGTGAATGAAGTGGGAACATGGAAATGCTATATGCTCTGAAATGTCATGTTAAGTGATGCTAAATCATATACATAACACAAATGAAGCATGCTATGGTACTCAAAACTCAAAGCTAGCATATGCATTTGTACTATAACTATGCAAAACATGAAGCATATGGCCAAGGCAACCCAAAATAGTCCTAGAATATGTCAAAATGAGTCTAAAACATGTATGGAAGGAAGCCAAAACAAGCTAGCATGAAGGGCATAAAGCATGGATCATGCAAGGCAAATAAGGTGGATTGCACTACACCTATCAAGACCAAGCATGAGATGACTTAACCAACAAAAATCAGAGTTACATCATGGCAAAATAACCCCAAAAACACATTAAAATGATAGCTCGCAAGCTTAGGCATGAAGGCATACGCAATGGCTCATGTTTAAGGCATAAACGGCAAACCCTCCAACGCATTGAATAAGTGAAAGATGCAAGTGTGTTGCCACACTACATGGACTGAAATCACATTTCAAATGATGCCAAATCAGGAAAATAGGCCAAGCAATGCATGCTATTGGACTTGATACACAAAGCTAACAAGCTAGAATGCACTATAGCTATACAAAGCAAGGCATGCATGACCCATACAACACAAATCAGAGCTAGAGCATGCTAAAACATGGACAAAAGCTTCTTAGAGTTAAGCCAAAAACATGCTAGAATGGTAGTCTAAAGCATGGTACATATGAGGCTACTTCATGGAATTGTACTACAAGTGCATGGAGCATGCAAGGGGCCATCAAACCCACCCAAAACAGAGTCATGGCATGCTAAAACAACACCAAAAACCTACTGAAATGGAGTCAACATAAGCTAGACAGACATGCTACTTCATGAAGCATACAAGACTAGTTTATGAAATTTACACTACAAGTGTATTAAGCATGCATGAGGTGATCAAGCCAACCAAAAACAGTGGCATTCCATCTCAAAATAACCCCAAATACATGCTAAGAACAAGCCAACACAAGCTTAATAAACATACTCAAACATGAGGCGTATGAAGCAAGTATTCAAGACACAAGGAGAGGGGATGACCCTCTCCTATTTGGGACCCCAAAACCACCTTTCCACCACTGAAAATCCTCTGGATTTCAATGGTAGAAAGGTCATGCAAAGGCTAGAACAAGAGCCAAAAGGGATGGCTCAAAACAAGGCCTAACAAGGCCTAAGAGGGGGTAGACCAACCCCAAGACAAAAGTGACCTTAAACAAACATGTTAAGGGCTGGAAAACAGAACTTTTTACAGTTAAGAGTTAAGCTTAAATCAGGATGCAAATGGGTCTAAAAGCTTAAGCAAAACAAGGGGTTAAAGGGCTAGAAACTCACCCTTGATGAACACCTTCAAGGCTGCAACTCCAACACACTTTTTGAACCAAAACCAGTCCAAAAACTTCAAAAACAACTTCAAGGGACCTCATCTCCAAGAGCATGGTGTTTGAGTGTGTGTTTGTGTGTTAGAGTATGAAGAATATGCACTTTTGAATACAAATATGAAGAGGAATGGAGATGTATAGATATAGATGATATGTATAGCTTCAATACAAAAATCTGAACCTAAAGCATGAGGGAGAAGCTTCTCCTTTTTAGAGAACAAAGCTCAAGCTTGTTGGACAAGCTTGGGGTCTAAGGCCATCCCTCCATACACGTGTATGAAGGATGGTTCTAGTGCCTTCTAGCTGTGACAGCTGGATTGAAAATATCTCTAAAAAGGGGAAGAAAAGCAGTCGACCACTTGAAGTGGTCGGCCAGCTACTTGAAGTGGTCGGCTGACCACCACAAGTGGTCTCCCAAGATGAAAACTGGTCGGCCATGGTGGGAGAGGGTCTAAAGCATGAAAAC
>MSTRG.125853.1 Scaffold611 227650-274092
AATCTGTATTTTTTTTTTTTGAAAATAAGACTGATTTATAATTTTCAAAAAACTAAAAAGCAATCCTCCTATAACCATATGCCACGTGGTGAGCCGCGGTTGAAATTATGCGCTTTCCCCTCTCAATGAGACATTTTCATTTAAAATAGAATCTAGTATTTTCTTTGCTGCCACACATTCTCCTCTACAAAACTTAAGAGTTTAGTTTTTTACGCCTCTGTAAAAGAACTGTAAAACTCAAAAATCAAACCCTCTCTCTCTCTCTCTCTACAATGTCGGACTACCTACCTAACAAGGTACTGATTGAAAT
>MSTRG.42492.2 Scaffold1983 1692536-1698323
CCACTATCACCTCCACTACACCTACTACCACATTTTCTTCTATATATAGATTGTATAGGAATTGTAATTTATCAATCTCGTAATACAACAATCTTGTAACATCAATCAATAATACATAAATTCTTACAACAACTACTATTCCACAATTGTCATAGTTGAGCATTAAAATGACAGCAATCTTTCGATGTAGGAGGCCTTGTTGTGCAATACCTATGACATTAGCAAATTCCTCCAGGCATGAACAAGTTGAGTTGGTAGAAGGTAGAGCCTTATTGAATGCTTGACAAGTTGATAAACAACGCCTACTGTAGGTACAAGGTATATTTTCCATGTGACAAGCCACATACATTGCCACATCATCACCTCCATGAATATTGGTACCACATGTTAGCCTCATGAGGTGTCACGTGTACCAATGATACACTGCCATGTCTTCGCACTCCCTCCATTGTTTAGCTATGTGGGTCGAGACTAACAGATGCTATGCCTTAATCTTGACCTTTGGAATTTATAGGAACAATCTCCAAGAAACACCATAGATAATCTCACCCAAATGCACTCAGATTCTCCTAGGACCAAACTGTGCAATTCTCCACCTCAATACATTTTTTCCTCCCCATGGGCTGAGTAACCCTCCGCTTAAATGGGTCTTTCCATTGCCTCACAGAACAATGGCACCCAATGCTTCCAAGCCATCCTAGGGCAAGGCATAAGGCTAGGGACCACCTTGGGGTTGTTGCCTGGCTCATGGGGCGCCCGAGGAATACCTTATGAGCATCATGTGAGATCTCTTAGGTAATGTGGCTTTGTGGTTTGAGTTGAGGGTTAATCAAGGTGTCCCCCACTCTCCCTTGACAAACTTGAGCATTGACCGATCTTGGAGAAAATGAAGGTGTTCTCCAAAATATAGATGGTGTGCTTTGTGTGTTCCCCGCACTTGAGGAGGATGCTCTACCACCTTTGTAGTCTATAGCCTTCAAATATTTTGGCGGTTTGGCAGTGCCAAACGAAAAATATGAATATAATAATTAACTAGTAAAATATAGTGGAATTATTTTTTTACTATTAGAGAAGTTCTACTTGAAAAAGGAAATCAACCAAGACCCCATTAGTAGCAACGAGCGAGAGTGGGTTGGGTGTTTGAAGAGAAACAAACACAAAGCTTCGTTCCTTAGCATAGTTTTCACTTCTTTTTCGCCAAGTTTCATTCGATTTGTTGTGGATTGGACGATGGAAAAACCAGCAAGCTACGGCTTCAAAGCTTACCTTTTTATTAAAAAGAGAAATCACCCCAAGGATGCCTTCGGCATCTAGGGGTCACGGGCCAACCACAGAACCATGCTCAATAAGTTGAACACATTAGCTGTCCGCTTTCAAGTTGGGCAGTAAGTGTAGCACTCTAGAAAAAATAAATAAATAAATAAAAATAAAAATTCCTTCTCATCACTCGAGCGATGGAATGATCGCTCGAGCGGTTTTGCGAAGCTTCCAGTATTTTTGCAAGTCTGAAATTCTGGAAGTTGTTGATTTTCACTCGAGCTCAGGGTTGATCGCTCAAGCAATGTGATGTCTCTAACACACGAGTGCAGGAGTGGCCGCTCAAGCGGTCTGTTCAGGATTCAGCATCTATAAAAGCCCTTTTGGTTCACTTTTCTTCATTCTTTCATGCTCTTTCTCTCTCCTCTTCCTCCATTCCGCCATTTTTGAGGGTTTCAAGCTTTCAAGATTGATTTTCATCTCTTTTTATTCATTTTTTAACCCATGTTCCTTTTATAAAAATGTAGAGCATGCCGAGGGCTATCCATCCATCCAAGTGGATCGCATTTTCATCAAAGTTGGAATTTCGGGTTTCTTCTCTCTTGCTACAGGTAGGGATTTCCTTACTTCTTTACAATATTTTCTTATAGATAGATGGGTGGTAGTTTGTGTATTGCATAAAAACCTCTTATTAAGGATATTTTCTCAAAAGCATGAAAAGGGAGTTAGGGTTTTCAAAATAATGGAATTAAATGTAAAATTGAGGTGGGTTATGGAAGTGTTGGGTTGTTAAAATATGATTTTGTGCCTCAAGGTAAAAAGCCCTAACTTTGGTCTAACCCTAATTATGGACTTACTTTAAAAATGAGTATTTGTTATAATTGACTTCAATTTCTTGAAATCAAGTGCGCGATTGGAAAAGACGAGTATAAGTAATGTAAAAATTTATGTATTATTGATTGATGTTTATTGATATATTACAATGATTCATGATTCCTATATATAGAAGAGGGTGAGTGTGTAGTAGGTAAGGAGTAGGTGAAGTGGAGGTGGTAGTGGTGTAGTGGGTTAGGTTTAGTGGAGTAGGTGAGGTGGTAGTGGTGTAGTGGGTTAGGTTTAGTGGAGTAGGTTTAAGTGGGTGAAGTAGGTGATAGGTTTTAACAAGTAATGAGACTTAATTGTTGTGAAAATAATATTGGTATGTGAGGGTTATGTTTGGGAAGAATTGATTGTTAGAAATTGAATTAATAATGTTAGGGGAAGTGTAGGATTCTAATTGTGTTTTATAAGTGAATATAACGAATTGGTGTTAATTGTAGAGAAGTAAAGAATATTGTGGAAAAACAAATTGTAATTGTTTCTAAAAATAACTCCTGTGTTTGTTATGGAATGCGTTGTTGGTGAATTGTATAACGTAATCAATGAACAATGTTGGTGGTTATCCATGAGTTGTAAGAACGAATAACATAATGAATTGATGGATTATGATATTGAAATAAGGGTCCGTTTCCTTCCGGCTTGTGACCGGTAAAGCATGGCGCTTGACAAAGGTTCCGCATTCCTTCCGGAGTAGCACCCGGAAAAGCGTGTGGTCTGTTGAGATGTGTTAAGGTTCCGCGATCGAGAAAAAAAAGCTAGCAGCAGATCAAGTAATGCCAGTGGAAACATCTATATAGTGAGTAGTTTTGTGGTTTTTCATCATCTTTGGCCTTTACACAACGAGAGAGAGAGAGAGAGACAAGAAGTAGGCACTTTTCAACACTAGAATTTGGGTAACACATCTTTTGGAATGCGAGACAGAGAGACAACAAGTAGGCACTTTTCAACACTAGAATTTGGGTAACACATCTTTTGGAATGCAATTTTGGTTCTGTACAAAAATGGAGATAGAGGAAGCTTCCAAATAAGGAAGACAATGCAGTACGTTTTCGAATTAGTATTTTTAGATCAAGCCACAGTAAATAAGATAGTTTTTATCGTCTGCTCTTTTTGTCATGATCTTTAACAACTGCCCCCAAGCTCAATTGACAGAAGGTGACTAAGACTCTAGGGCACCGACAAAGGTGAAAGAGAACCTGAAATATTTCTTAACATTAGTTGTAAGGGAATTTTACTAATCGTAATTTATCTATATTTCGGTAAATACTGATCCACACAAGTTATAACTCTATTTAGGTCAGTCTTGCAAACTATTTTAAGAAACACGCCCGTGAAAAACATTCATCAAGTGGAAAGCCTTCATCACTGCAAAGAACTTTAAATTGGTTCTGCCATTGGTCTTGGCATTTTTCTGTAAATATTCAAATCCAATTATATTCCTATTACCCTATTATAGATAGGAGTCCTTTGCTTTGAACAGAAAGAGCTATTCTAGGCATCTTAACCAATATTCCATTAGGTATTCAGGGCCCATTGGGGGATAGGCTTATGGTTATGCAAAATTGATTGTTAAGCATTGGTAAAGACATATATGTTCATAATCAATTTAGTGTTTGGATGTGGAATTCTAAAAGCATTAAAATTATAAAAAGCGATTATTTGACCATTTGGCTAAAATCCTTCAATTATGTAGATGCCAAAATGCCAACTTCACCCTTGGGTCAATTTAACATTGATTTATGAATCATTGATATCTATTGGTAAATATAAAATAATTATTAAAAACAAGAACCAAATAGAAAATTTAATTAAAAAAATATGCATGTGCTTTCACTGTACAAACATGATTAAATAAGCATTGGTTTCAAACATATATGTGTAGGCTTTTTCTGCATGTATTACCACCATCTATGTAATAATCCACATAAGTTCCCAAAAAAAAAAAAAAAACACTAACTGAATAAACAAATAAGATATCATTCATGTAAATACATTTCATTAAAAAAAATTGTATATTAATGATTTGTTTAAATGTTTAAGTTGATAAAAAACCTTAAAATTGGGCTTACTGGTTGTTGAAGCTTAATTCCACATATTGGCTAGAGACTAGAGTTCAAGTCTTGGTAACTCTTCATCCTTCCTCATTTTACCATTTAATGTGGGGTTGAAGTATAATATGGAATAAGGTAAAGGGAATAATTGGTATCATAGTGAAAAAATTCAAATTTGAAAAATCATGTTTGCCACCAAAAAGCAGCTTGGGAACTGCTTATGCCAAAATGTGGGTTTCCACACTTGGATCACATTTGGACAATGCTTAATTGGCGGTTGGGCCTCAAACCTGCTTCAAGGCTACCAATTATGGTTCCCAAGCAGAGCCTCACCTCAGCTAGACAGCCAAAATAAGTCGAGGCAACATTTTTTATATTGGGAGCTAAAAAAATAACAGTATAGCAAATAATGGGAGGAGAAATCAATATTGG
>MSTRG.5376.6 Scaffold1102 808158-808390
TGGTGGTTGGTTTTTTTGATGTGGATTTTTGTGGGATTGGTTTTGAAATTTGAGGTGTTCTTGTAGGGGGGGTGGTGGTGTTGGTGGTTTTTCTTCTATTCGGACAGCGGAGATGTGGAGGAGAGGAGGATTTGATGGTTGTGGTTGTGGTGGTGGTGGTGGTGGTGTTAGAGAGACATTCGAGAATGAAAATGTAGAGAGG
>MSTRG.84192.1 Scaffold344 3710026-3713633
GCCCTAATCTCCTACTGATTACTCAAATCATTATCAAATACAAATCACTGCCGAAATTTAACACCCAAATCTCTGGAATTGGATCATTGCCCCCCAAATAACTCGTATTGCAGCAGAATCCAATCACTGCCCTGACAGACTCCCCAGATTTTCATAAATAAATCACCGTCTTTCTCATTGTTGATCTCAGGAATCAAATCAAATTAGTTTCAAAATATCACACAAGCACATAATTTGCATTCGTGCCTATCGGGGGGCAGGGTTGCCCTGTCCTAATTTAGAAATGAGATCTACGATTCACTAAATCATTCAAAGAGACAAATAATAAAATCCTAGAAAGGAGGGTATCCCGCCCTAGTTTGGAAGGTGCTAATGCTCTCTACATGCAGAAGGTAAGTTTGGTCACAAAAAGCTACATCAGTTATTACTGTCAATATACCACGCCTTCCGAAGGGGAATGATCAAACAGTACTAGCAGCATAATTTGAAGCTTGCCTCGTTCACATTACATAACCCACGAATAGTGTCCGGGATATTATGCAGCAAACCTGAGGATAGGTGAATCGACCCAGTCAATTTGGTTTAACACTTGCCATCGGATCTCGAAGTCATCATCATCACCCATTGGGTGATAGTTACCCAACCAAGGCAATTTTGAGGAATTTTAATGATTCCTACCAGAGTGATCAATCTAAACAATTGTCTTTCCATAATTTATTGTTTCCCGAAATGTGACCCAATTTATTTTCAAGAGTGTGTAATCAAATCTCAACTTCAATTTTTTTTTTTTTCAAAACCCTTTTTAAAAAATAAAGTGCCTTTTTTTTATTTAAATTCTCAAAGTTTTCCTTCCCTCTTTTTTTTTTCAAATGTTTTGAGGAGTTCGGATTTTATTCCAAGGAATCAATCAAACAGTCATCCTCTAGCCAAATATCTCATAGAGGAACTAGAATTTTATTCAGAATGAGAGGCTTGGTCATCACTTCCTTGTCTAACATTTCTCCATAAAATTAAGGTTCCCTCAAAGTCAGTGGCCCAAAGATTTTCACTCGACGGACAGATCTTTCCATAATTTCTGAACTCACTCAAATTTTATTTTCAAAAAATTTCCAAGGAATTTAACATCTTATTCGAAGAAATCAATTAAACAATTACCTTATAGTCAAATTTCTTCTAAGGAAATTCAAAATTTCATTTCAAAGTGAAAGACACAGTCATTACCTCCTCATCAAACACTTTTCCATAAAATCAAATTCCCTCTAAAGTCGAAAAACCTAAAGATTTTTGTCTGATCAAAAGCATTTCATAATTTCTAAAATTCTACTCGGGTTTTCTTTCAAAATTCTTTCCTCCCAAGGAGCTTTGGATTTTACTCCATGTATCTAATCAAACAATTGTCTCCTTAGTCAATTATCTTTTGGGGGATTTGGAGTTTTTTTCAAAACGGAAGATGCGGTCACCACTTCCTTATCCACCATTTTTCATAAAAGTGGAAATTCCCCAAAAAGTCAATGACTTAAAGATTCTTATTCAATCAAACACCTTCCATAACCTCCAAGGCTCTACTTAAGTTGGAAAGTTTCTTTTTCCTTGAAATTTTTCTTTCAAAACATGTTTTACTGGGGATTTAAATTTTAAAAAGGCAAAAATTCTTCTCTATTGATCACTAAGGTAAGAACCCAAATACAAATTCAAATTCTTTAAAATTGGGAAATAATCCCCCTAATCTACTACTGATTACTCAAATCATTATTAGAATACGAATCACTACCTAAATTGAACACCCAAATCTCTGTAATTGGGTCATTGCCCCAAATAACTCGGATTGCAGCAGAATCAAATCACTGCCATATCAGACTTCCCAGATTTTCGGAAAGAAATCACTGTCTTTCTC
>MSTRG.60223.1 Scaffold2513 1131491-1132821
TGCAAAGGTTTTTCTAATAGGTCAGAGATACTAGCAATTTTTAGAAGCCCCTCTTGCGCACTTACAGCTATGCCATAAAGAAGAAAGATGAGACCAACTGCAGATTTATTTGAATCATTGCTGGCTTTGGTGGTTGACATGCCTTCCTCACTTTAGATGGTATGAACAATAGATCTTGCAATGCACTTGCTAACCTCTTTAGTTGCTTTAGCGGCAGGCCTGAGACATGCATCCTCAAGCACAAGG
>MSTRG.37875.1 Scaffold1857 895409-895814
TTTCAAGCTCTGTTATGGGTTTGAAAGGGTTTTTTTTTTGGGTGATTTATAGAGTTGTTTTTTGTGTTTTTTGCTTGAAATCTCTAAAATTGTTTTGGGAAAGTTTCCGCTCTGTGTTGTAGCTGTGGCTTCTCTGACATTTAGGCAATTTTCTATTTCTTATAATATGGGGTTTTGTTGACTTGTATGACCCTTTTCTGATCTGATGTGTTCACTTGGGTTTGTTTCTGGAAATTCTTCTGCCATTTCTGTTTGAAAGTAGTCGTCTTGCTGCATTCTTTATTTATTTGTTTTTCTTTT
>MSTRG.21997.1 Scaffold1492 95329-112445
AAAAAAAAAAGCTTAGAAGAGAGAAACGAGTTCTAGGAGAGGTAGAATTCTGCCGGAGCAAAATAGAGAGGAGAGGAGAGAAGAAGAGAGACAGAAGAAGGAAGAGGAAGCAGAAGAACCAAGAGAGAGAGCTCAAATCCTAACTCAAAAATCAACTAAAAATCACACCAAGACCATACTGAAGCTTCTGAAACAAGTTGAACTTTGACCACTTCTTCAGAGTGGAACTGAATCACAAGCCCAGCAATTTCAAGGCCATGATTTCAAATGAAGGGGTACAGAAGATCTCAT
>MSTRG.99061.1 Scaffold411 3211340-3211952
TAGTTAGTTCAGTTAGTCAGAACTCTTTCACCTCGTTAGGAGATTAAGAGCACAAAAAAAGAAGAAAAAGAAAAAAAGAAGACTGATGTGCAGATGTTTGTTATATTTGTTTCAGCAAAAGGGCAACCAGATGATGGACAAGGCCAGCAATGCTGCCCAATCTGCCAAGGAAAGCATGCAAGAGGCTGGTCAGCAAATGAAGGCTAAAGCACAGGATGCAGCTGATGCAGTTAAGAATGCAACTGGCACGAACAAATGAATGCTTCAGGGATG
>MSTRG.62332.2 Scaffold26 662664-664643
[truncated: 13,831,182 more chars]
